# Supplementary material
Source: PubMed Central journal article supplement (PMC6579958)

# <5y Without comorbidity Serotype 1

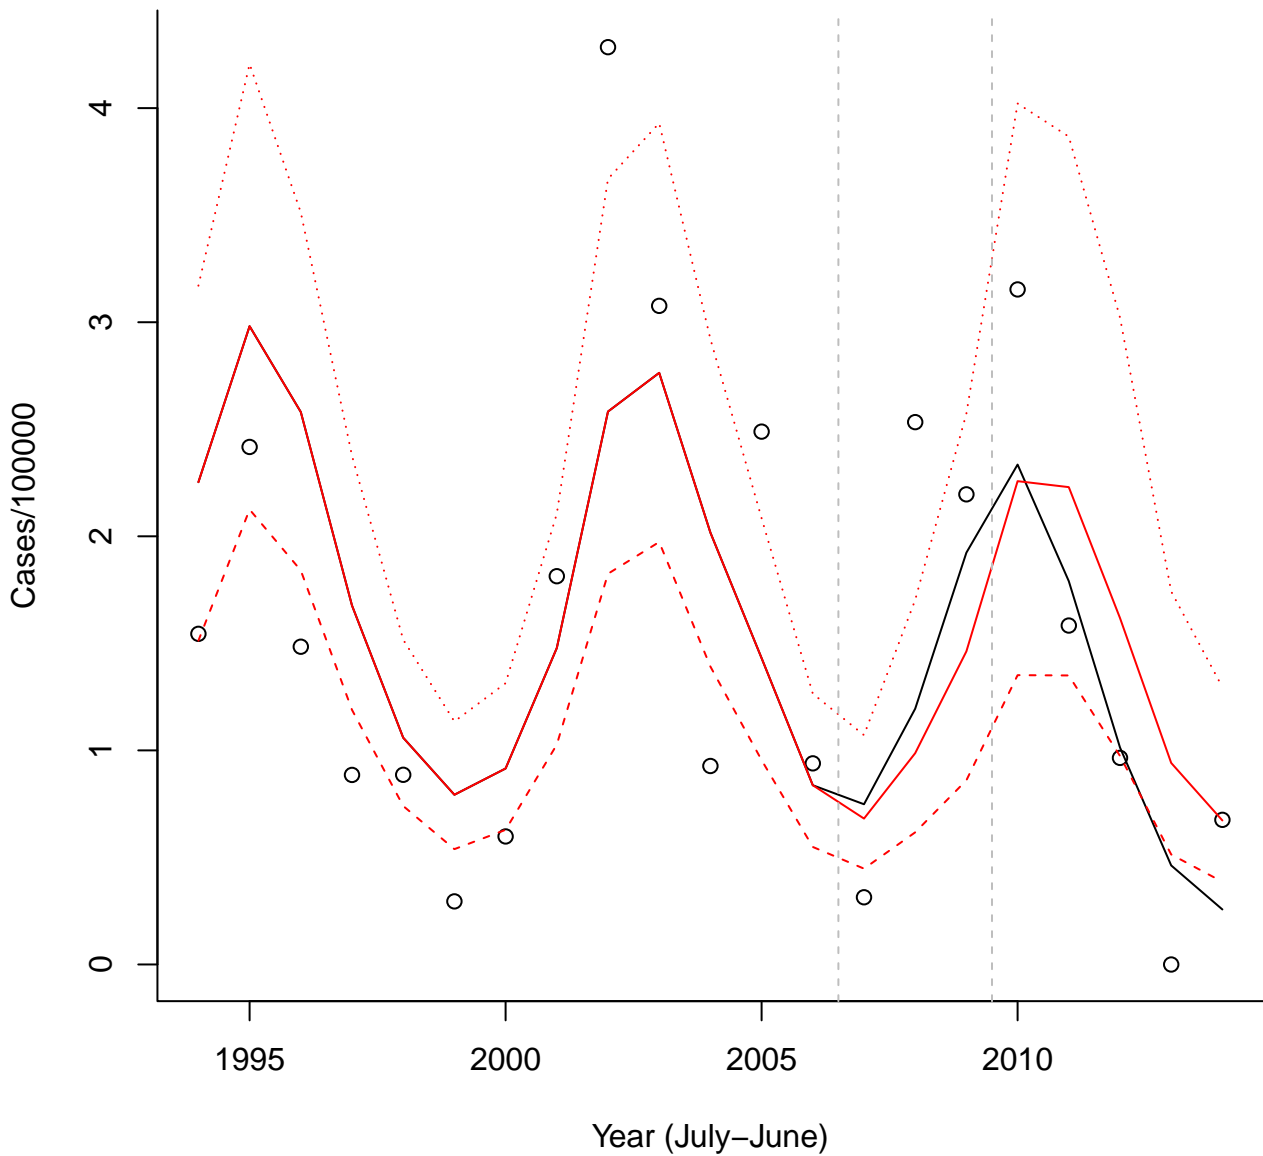

# <5y Without comorbidity Serotype 10A

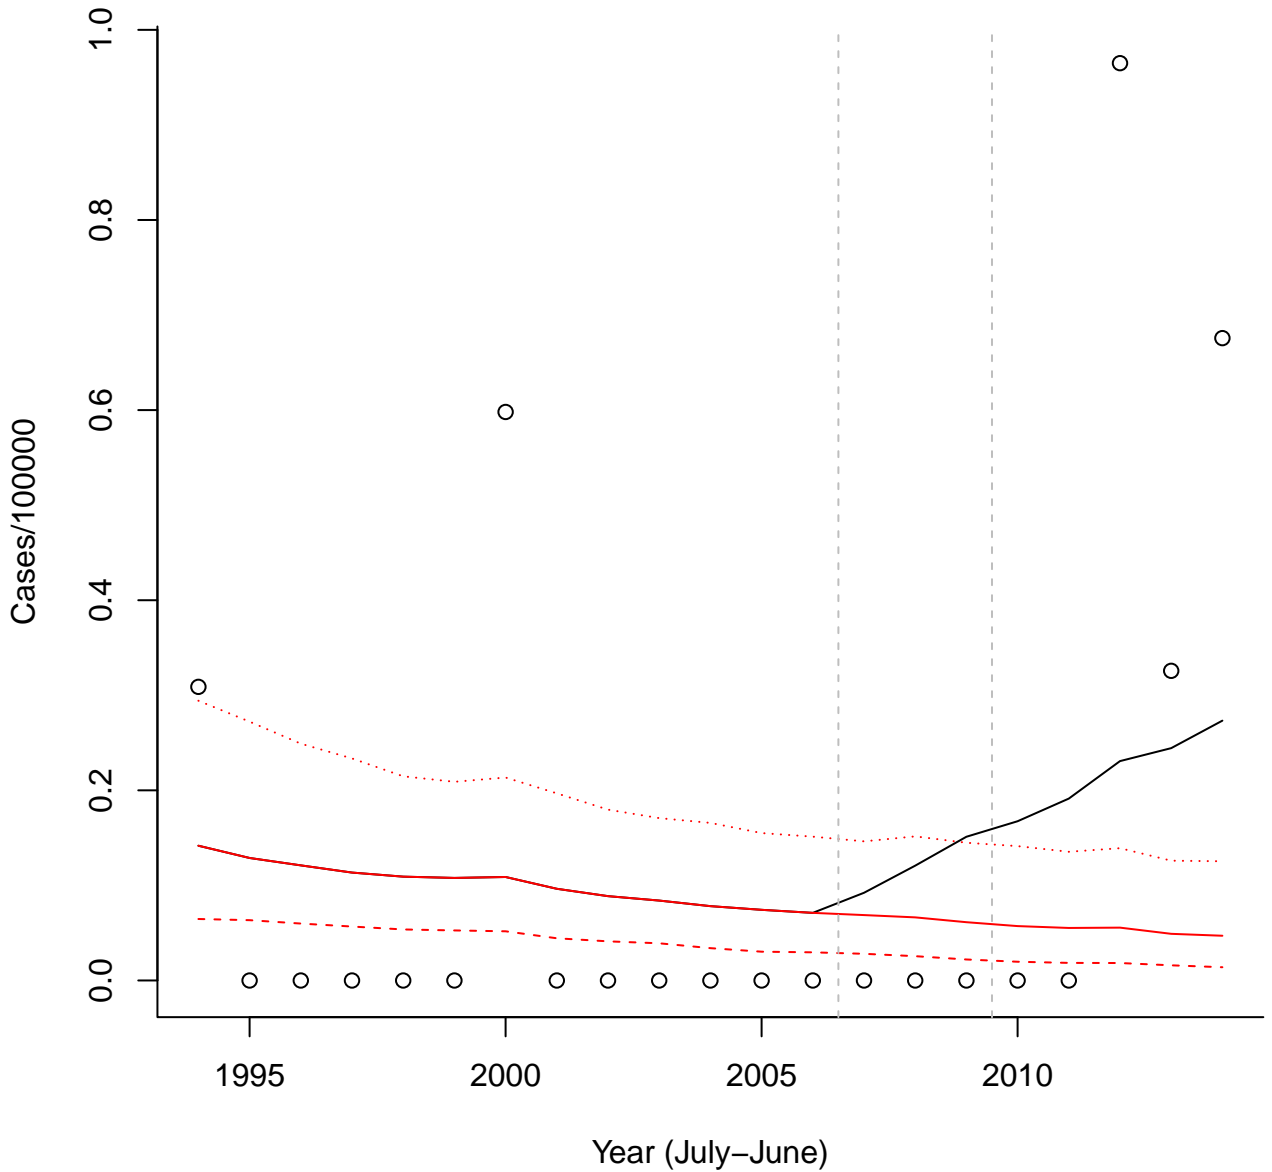

# <5y Without comorbidity Serotype 10B

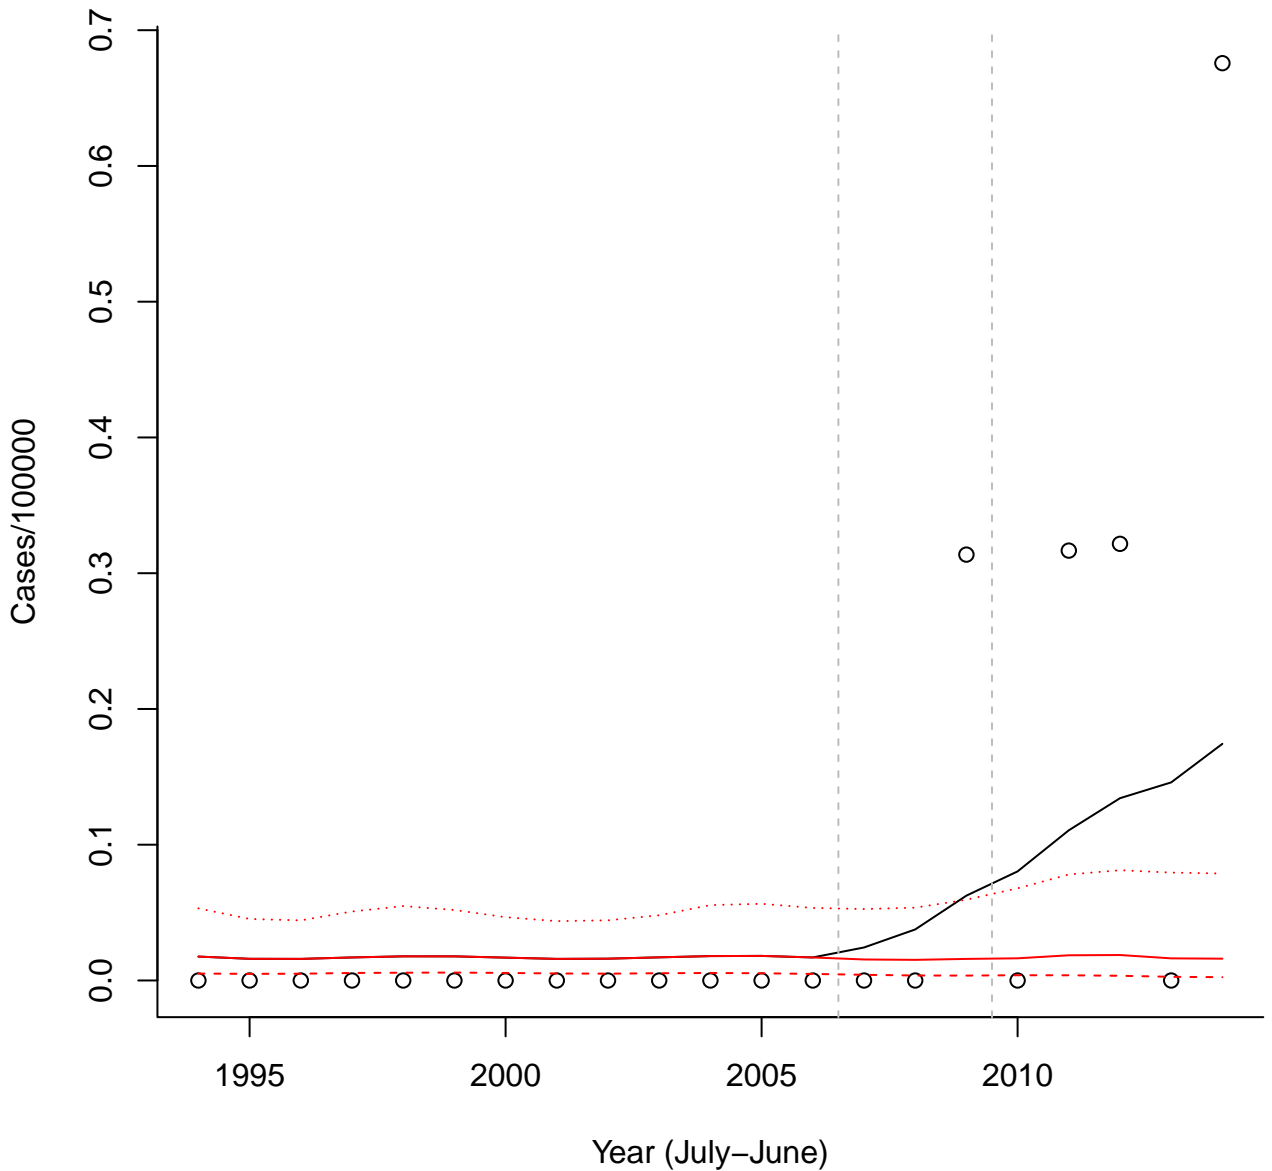

# <5y Without comorbidity Serotype 10F

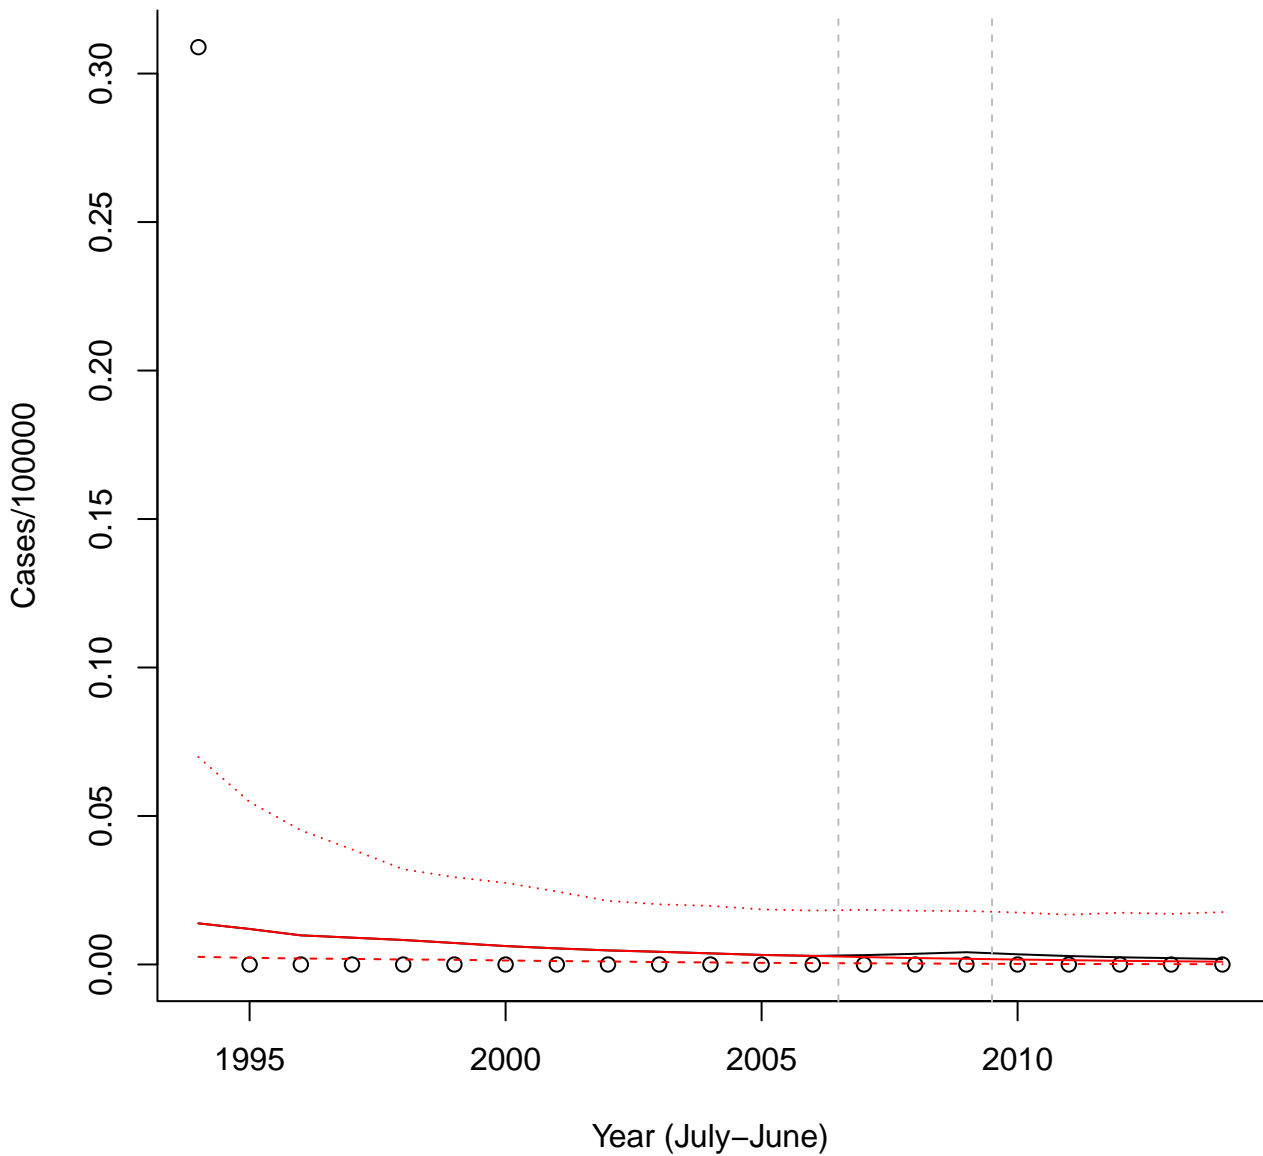

# <5y Without comorbidity Serotype 11A

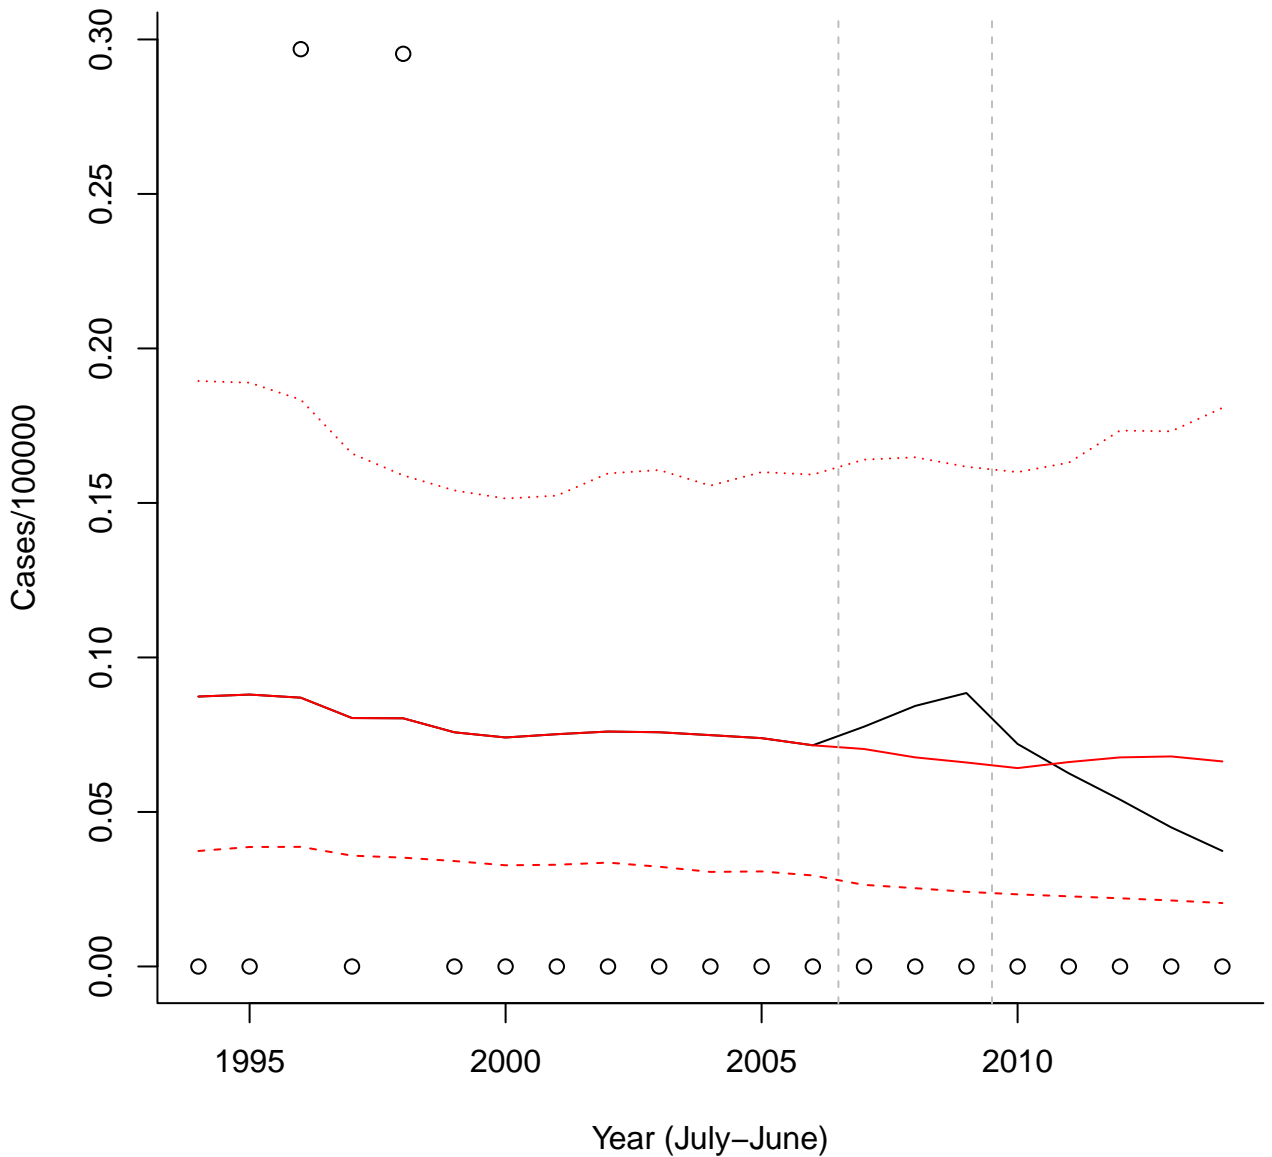

# <5y Without comorbidity Serotype 12A

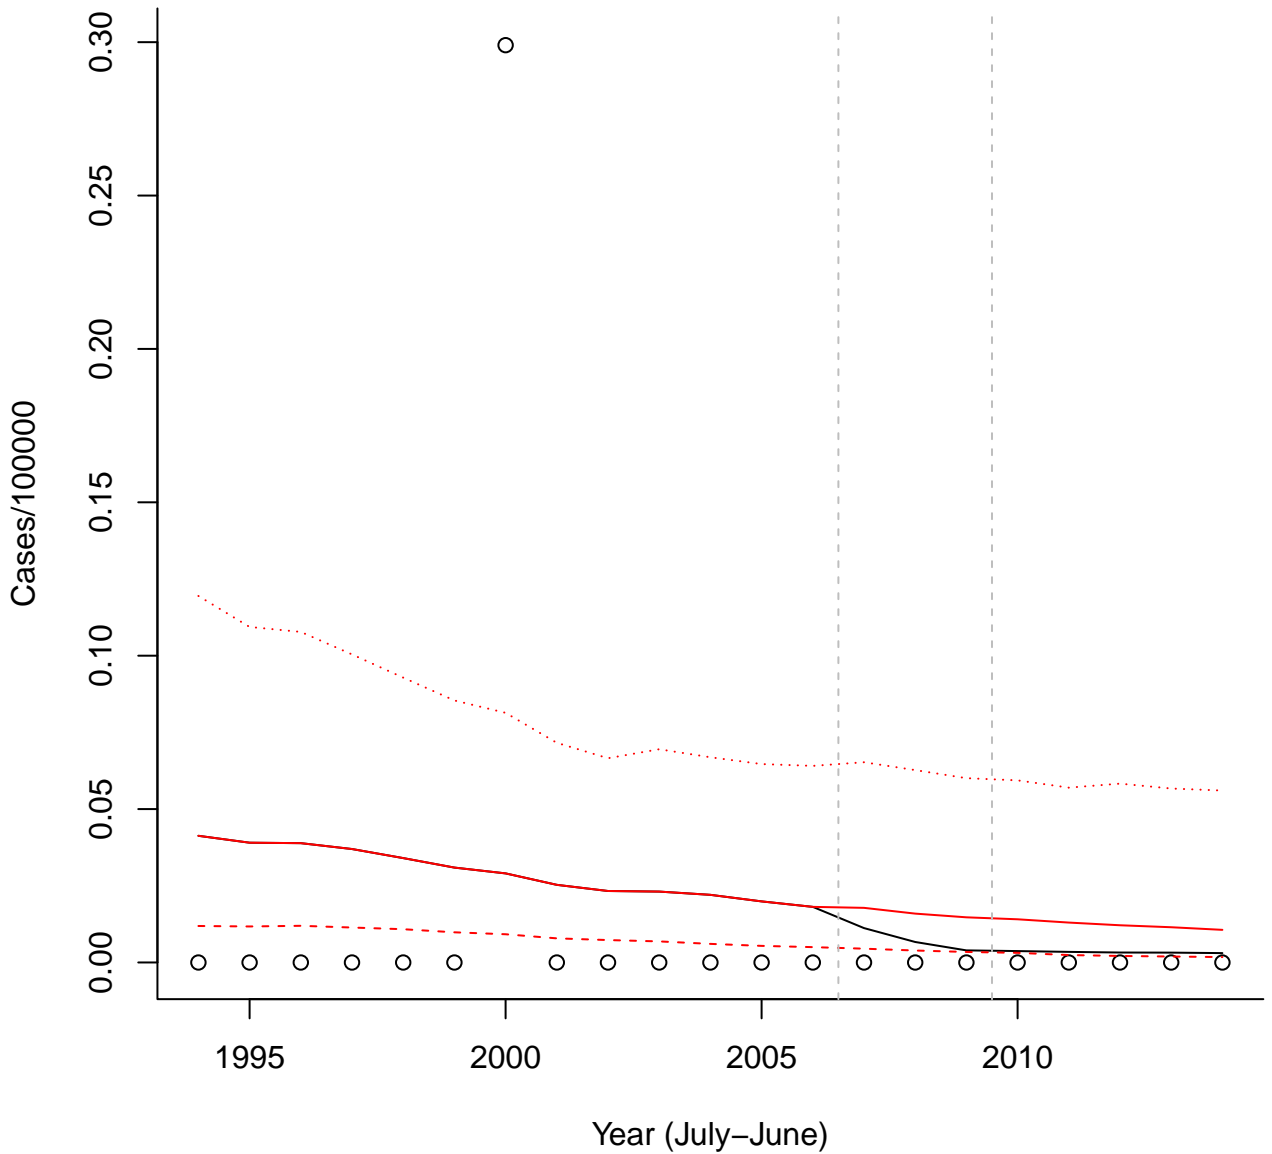

# <5y Without comorbidity Serotype 12F

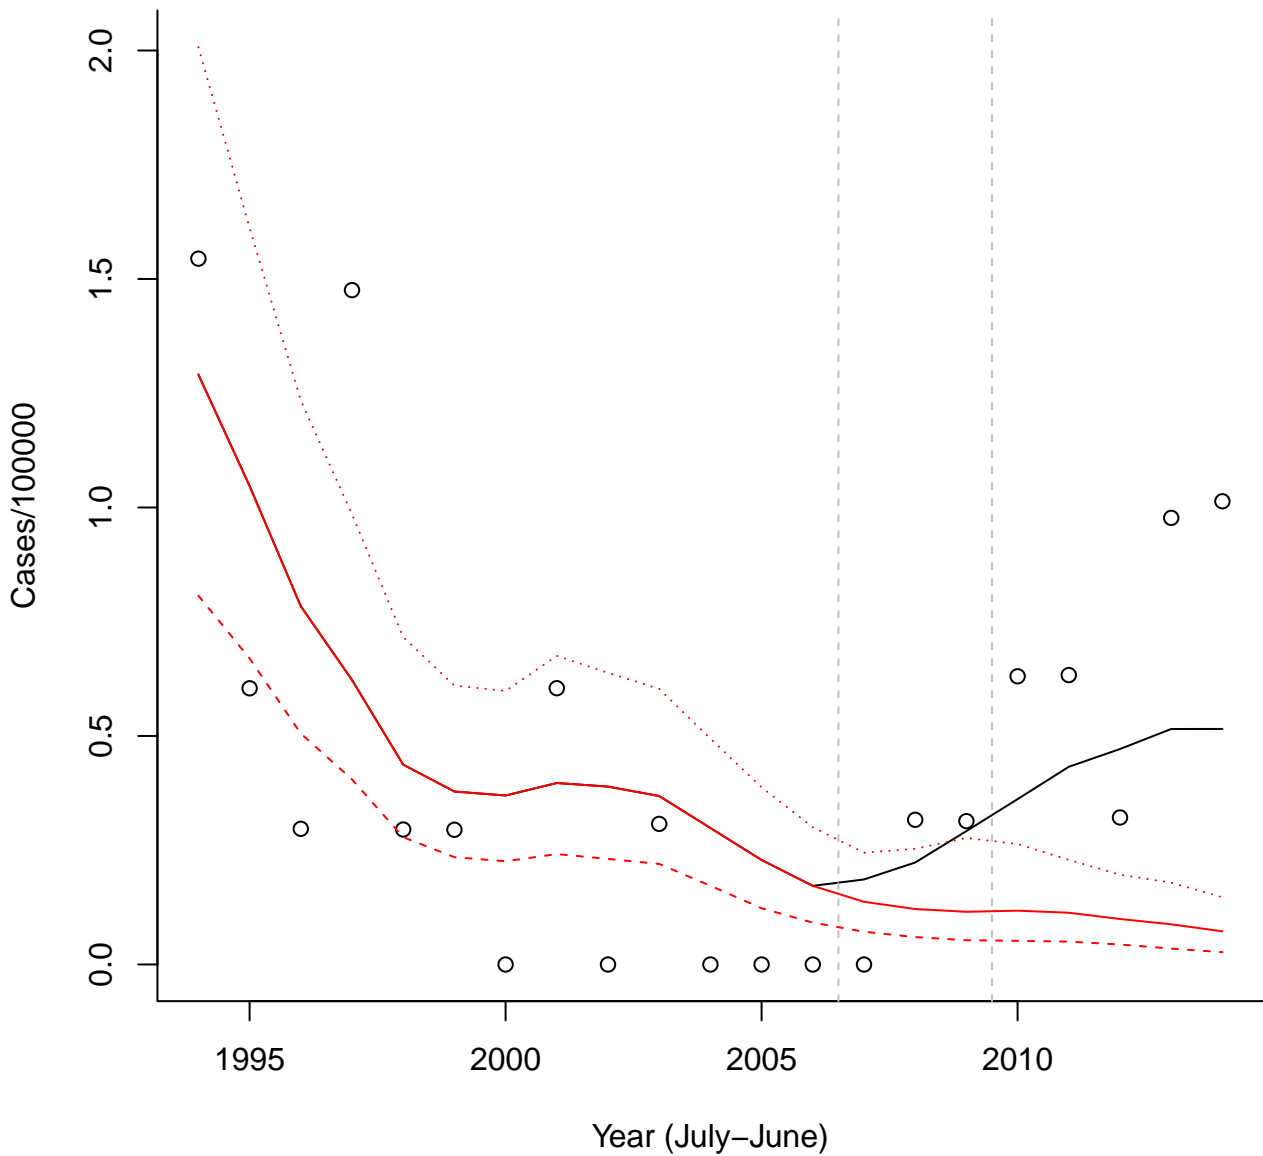

# <5y Without comorbidity Serotype 14

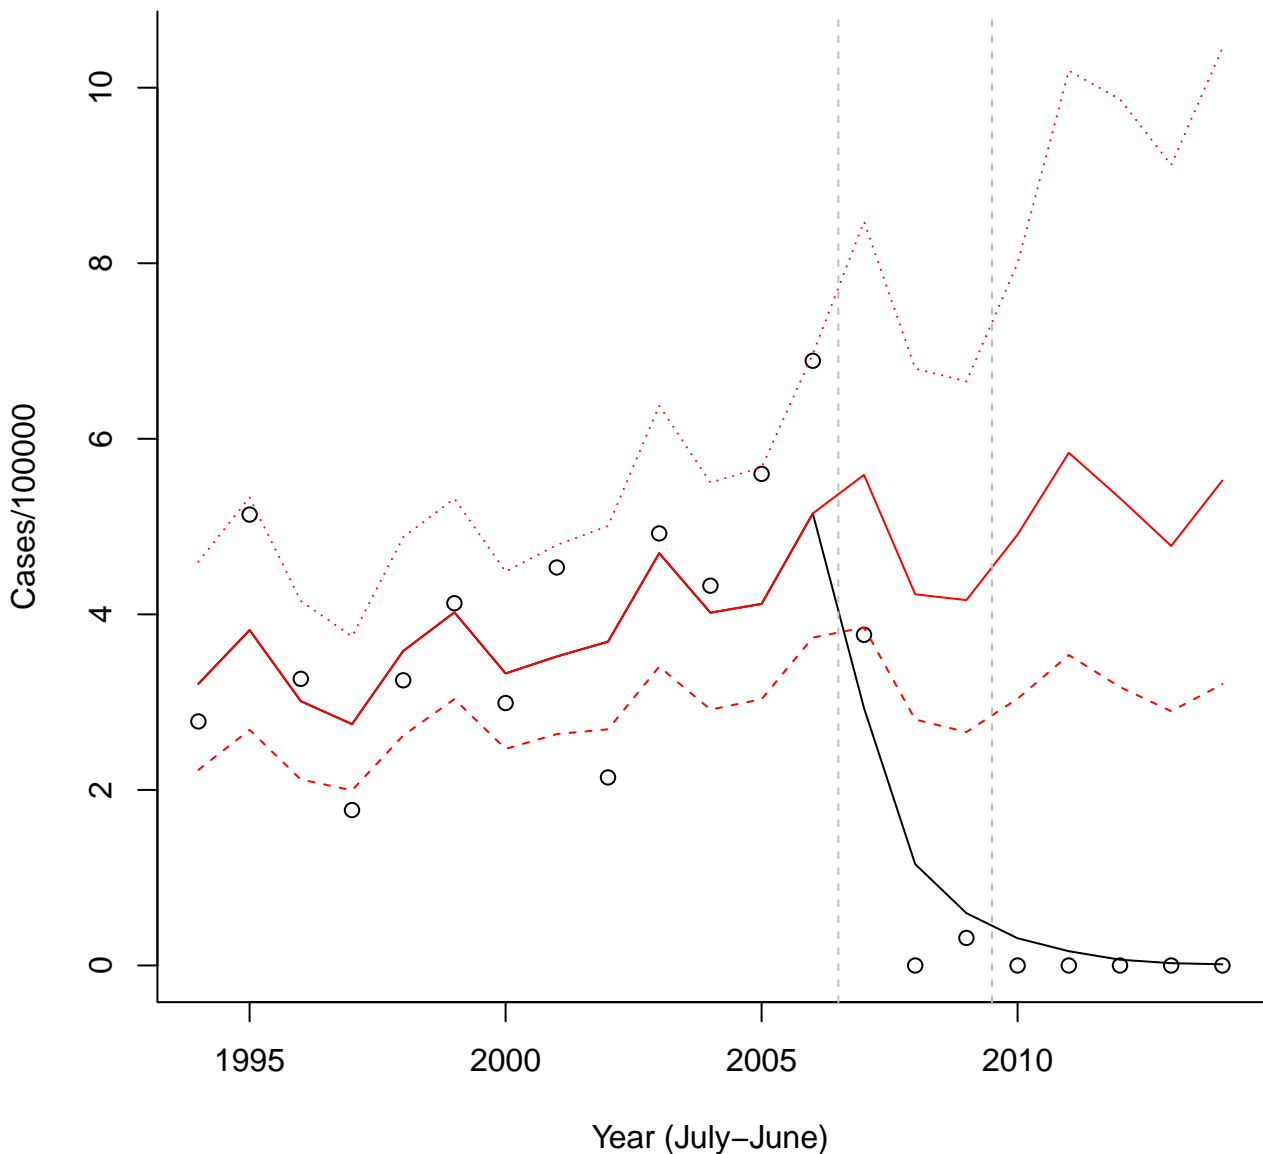



# <5y Without comorbidity Serotype 15A

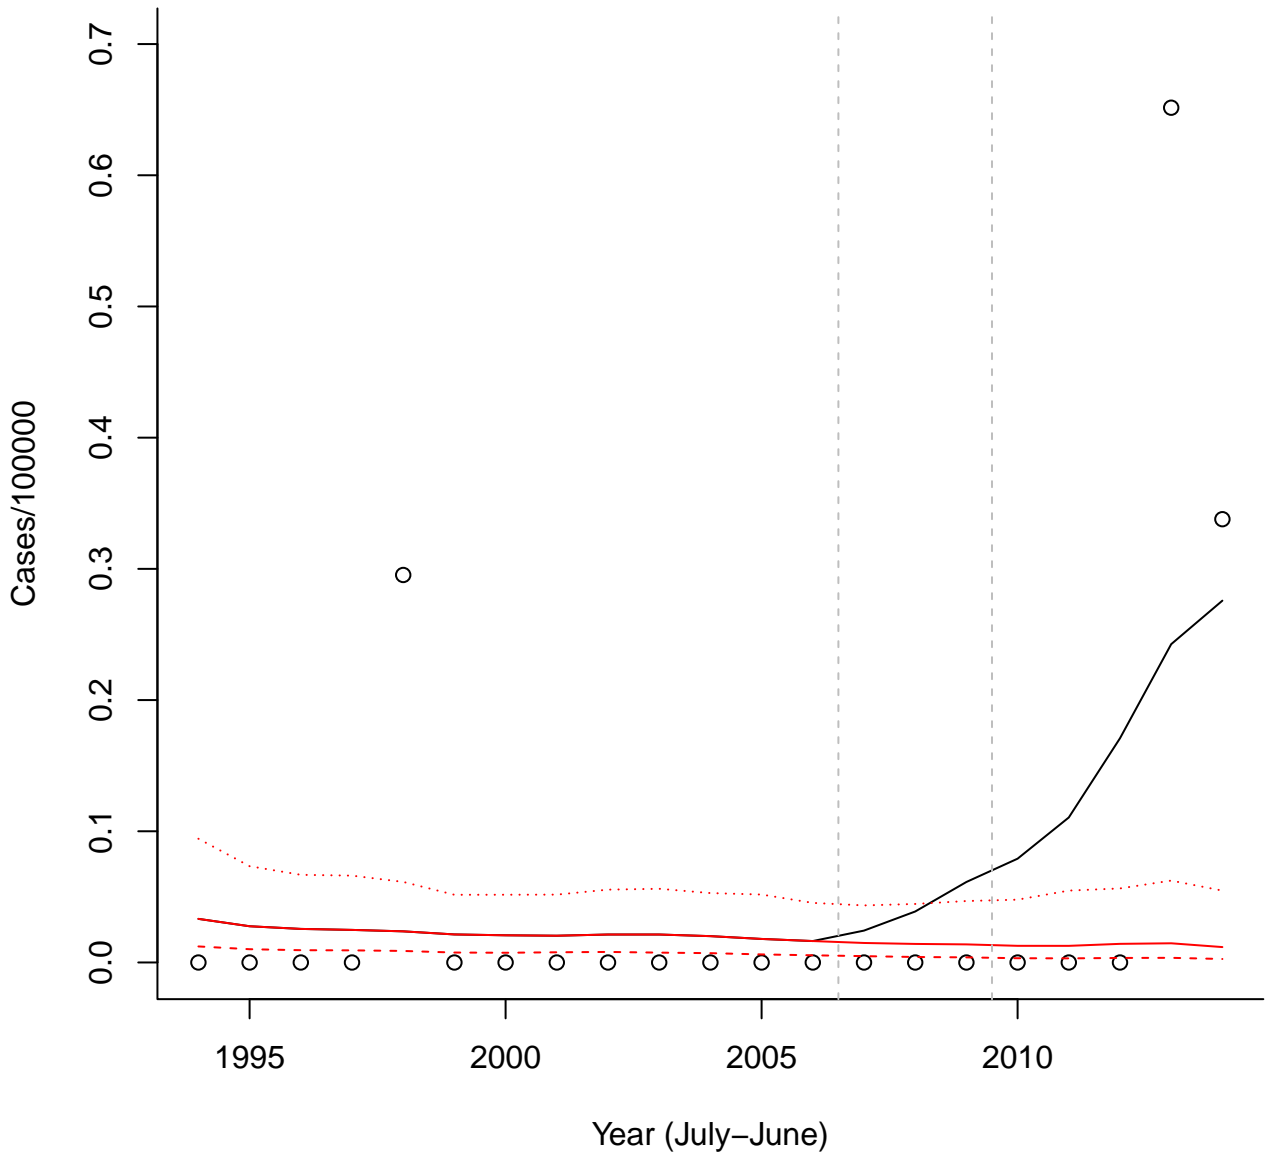

# <5y Without comorbidity Serotype 15BC

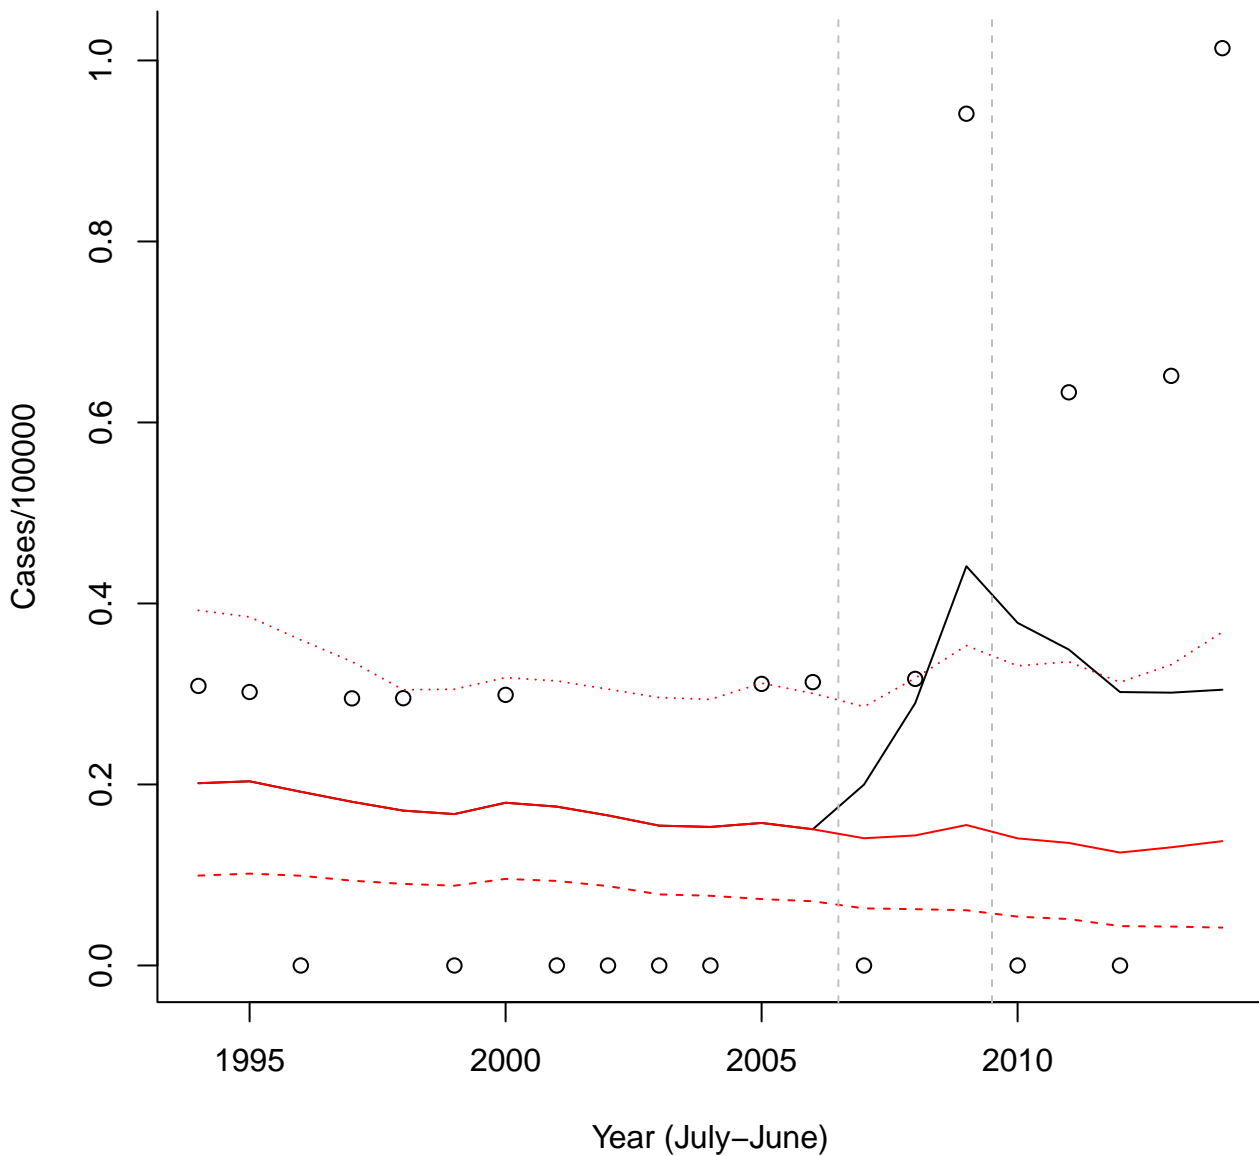

# <5y Without comorbidity Serotype 16F

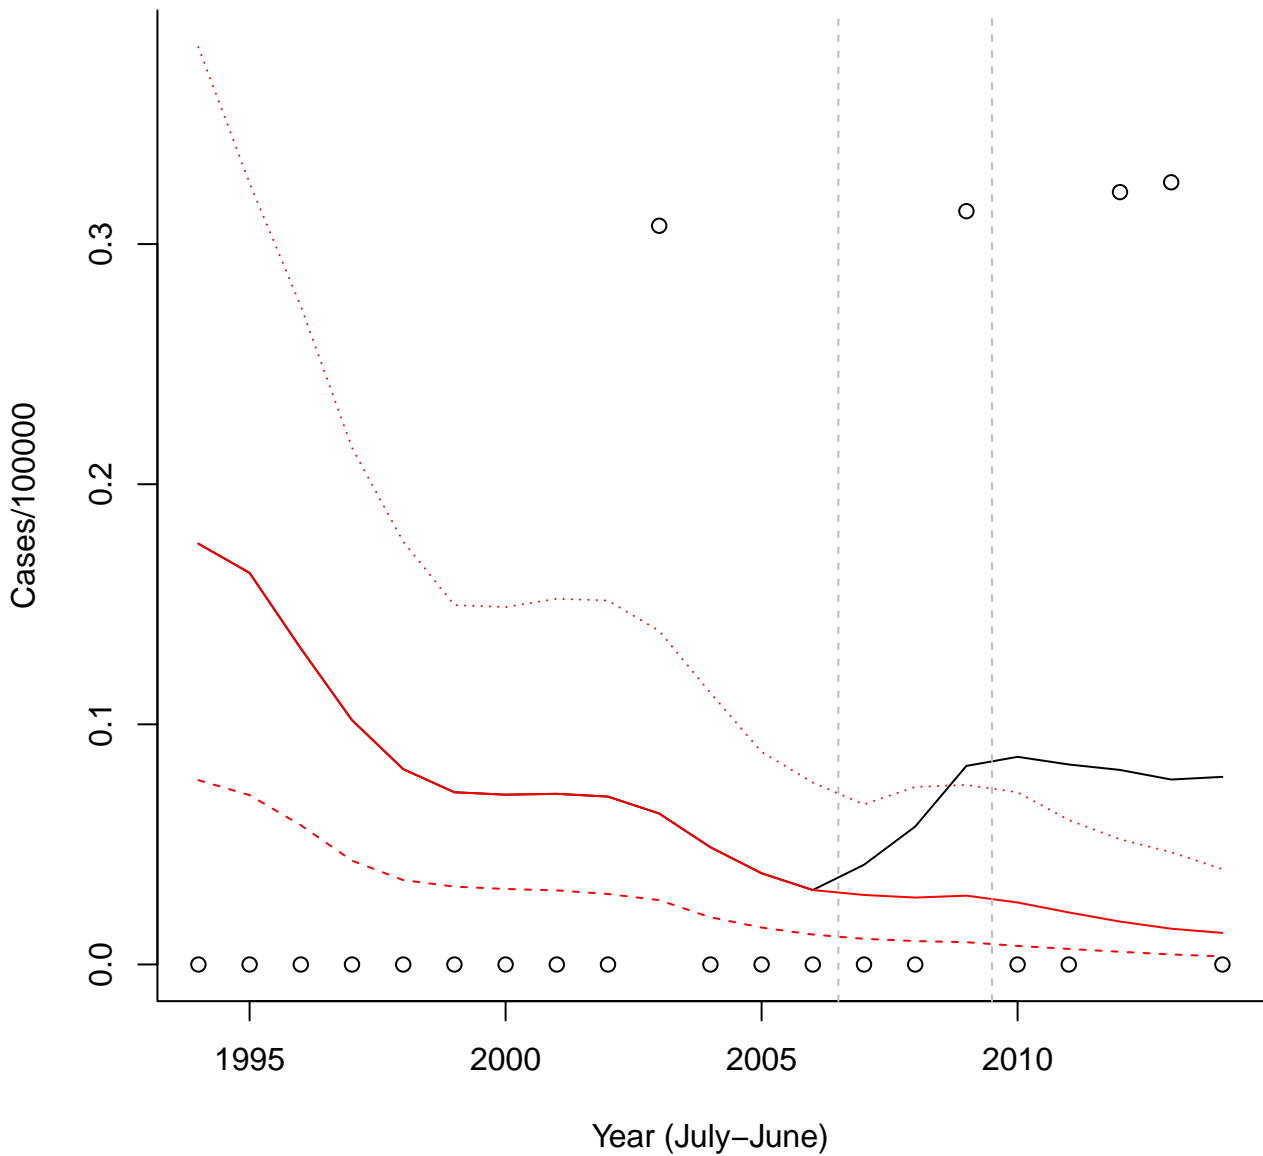

# <5y Without comorbidity Serotype 17F

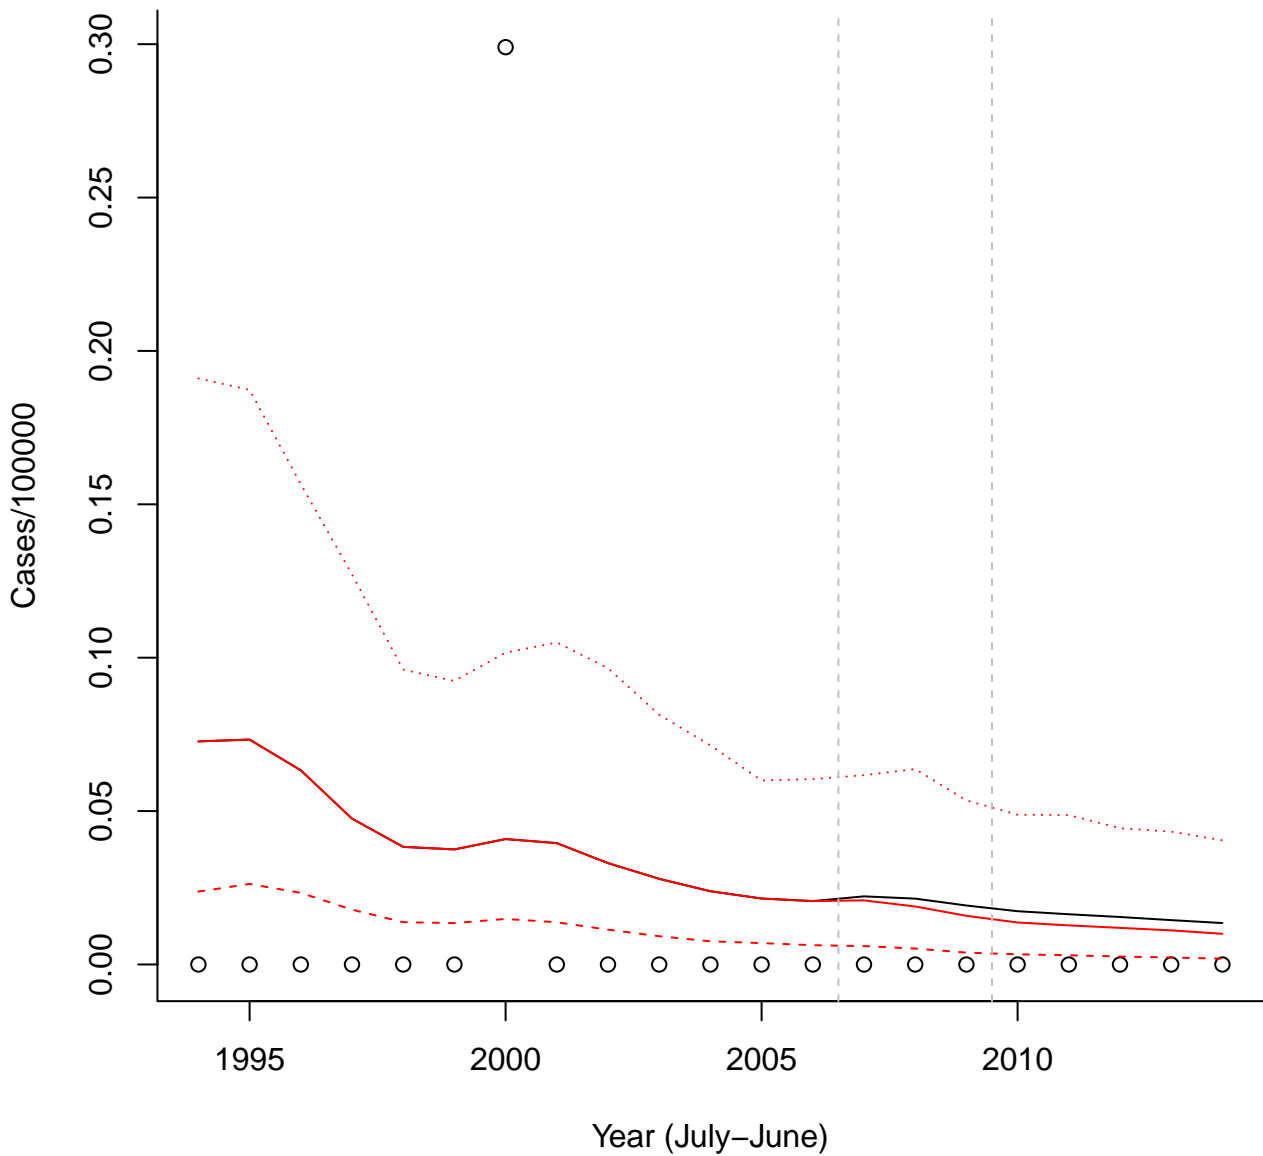

# <5y Without comorbidity Serotype 18B

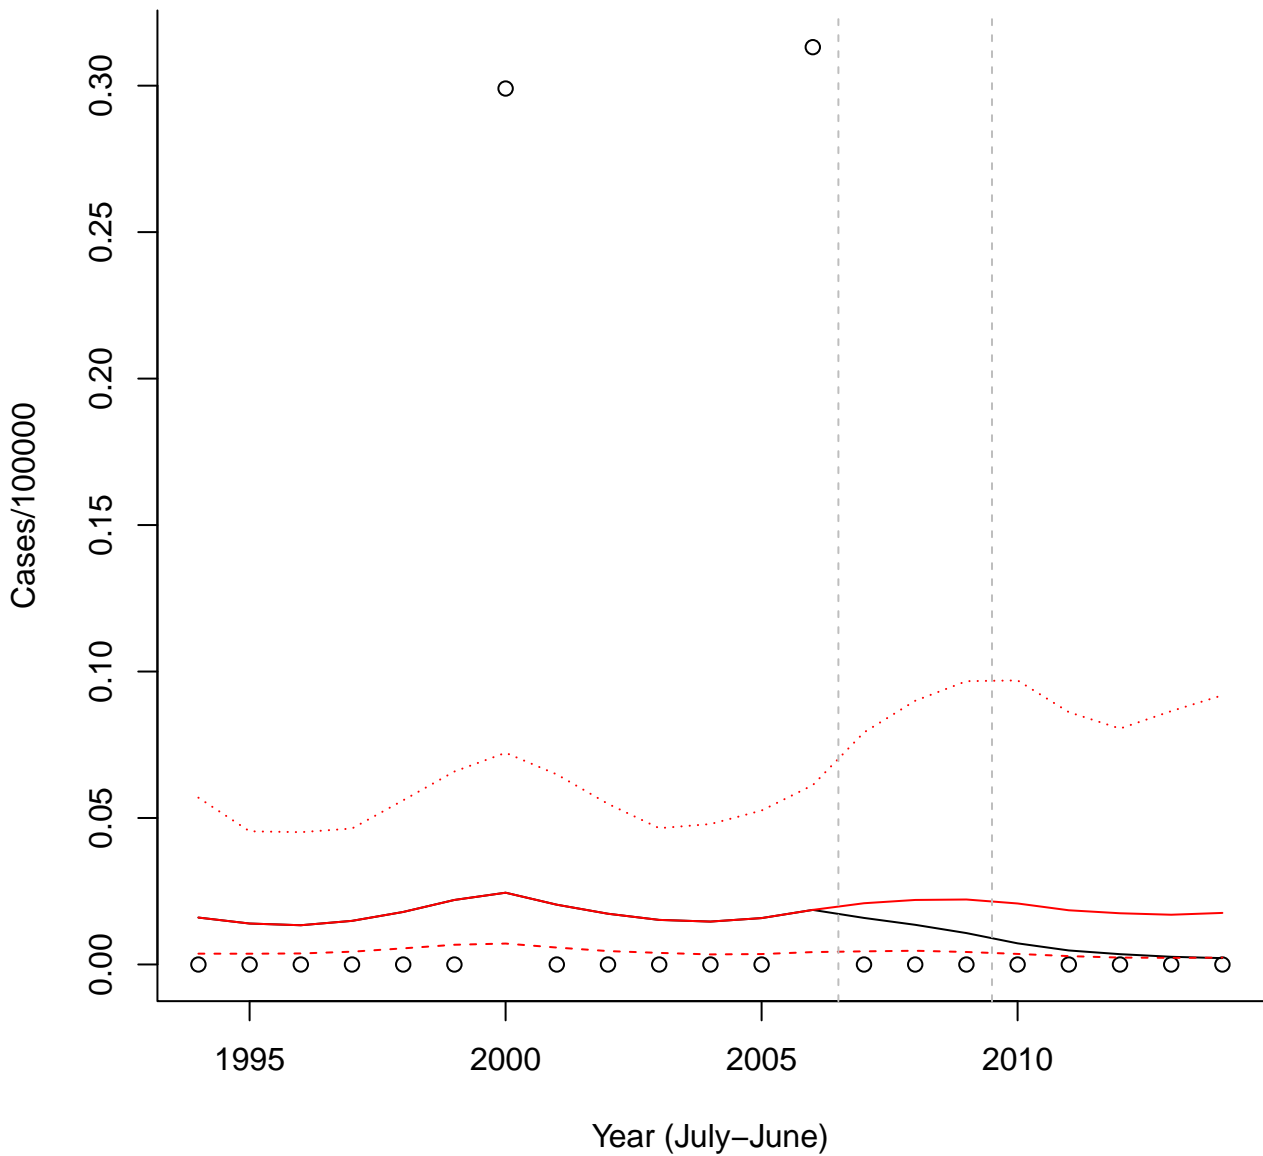

# <5y Without comorbidity Serotype 18C

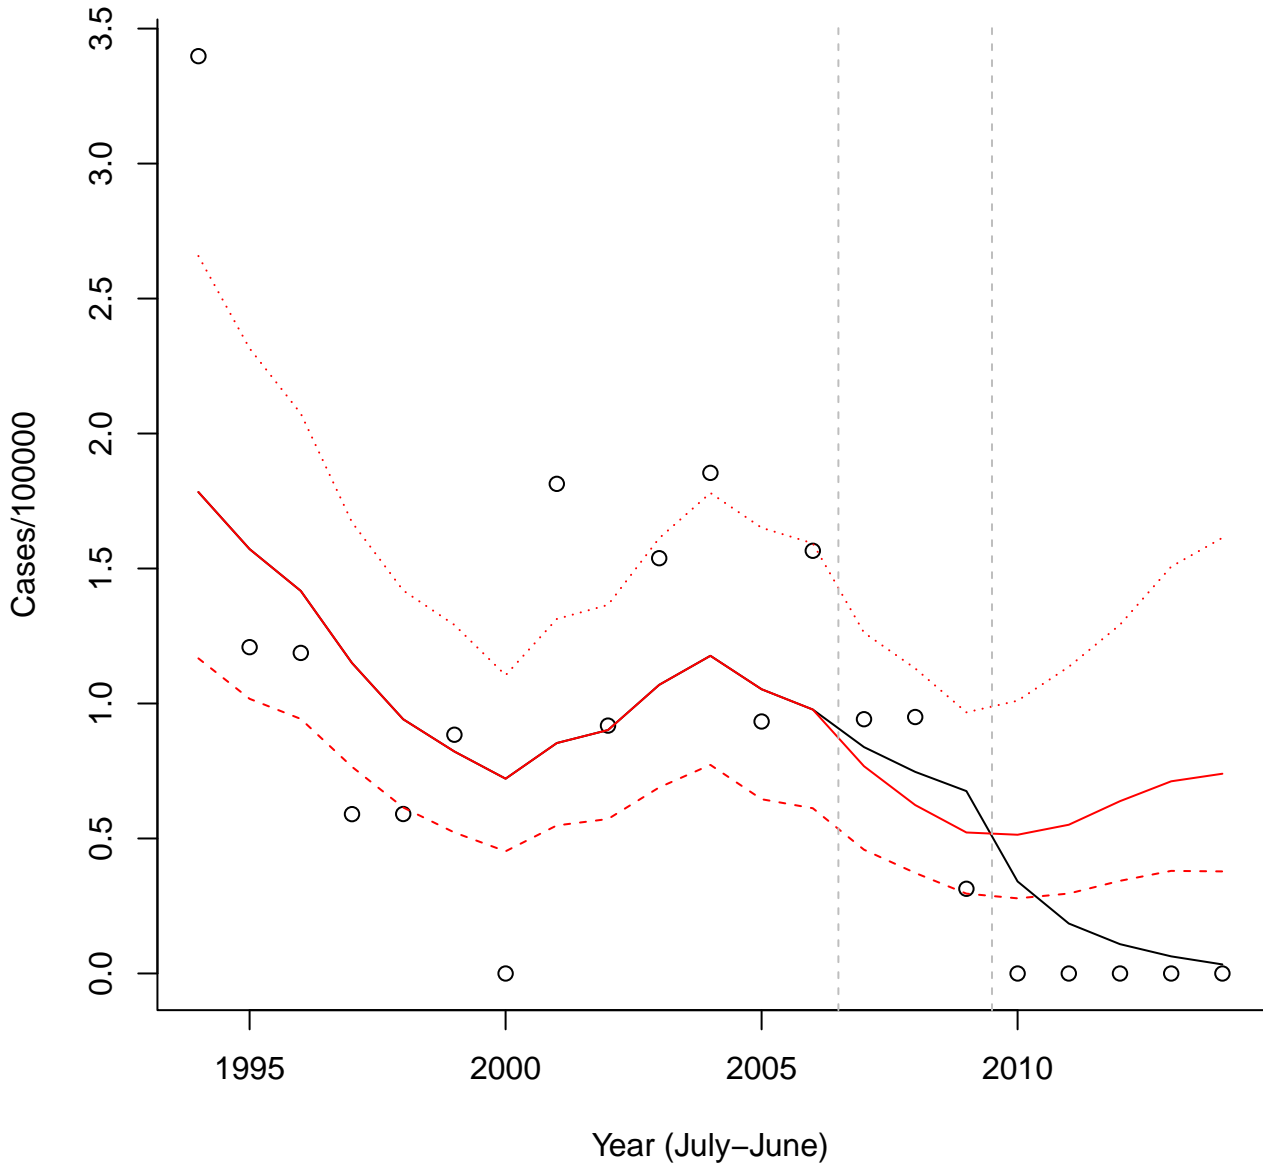

# <5y Without comorbidity Serotype 18F

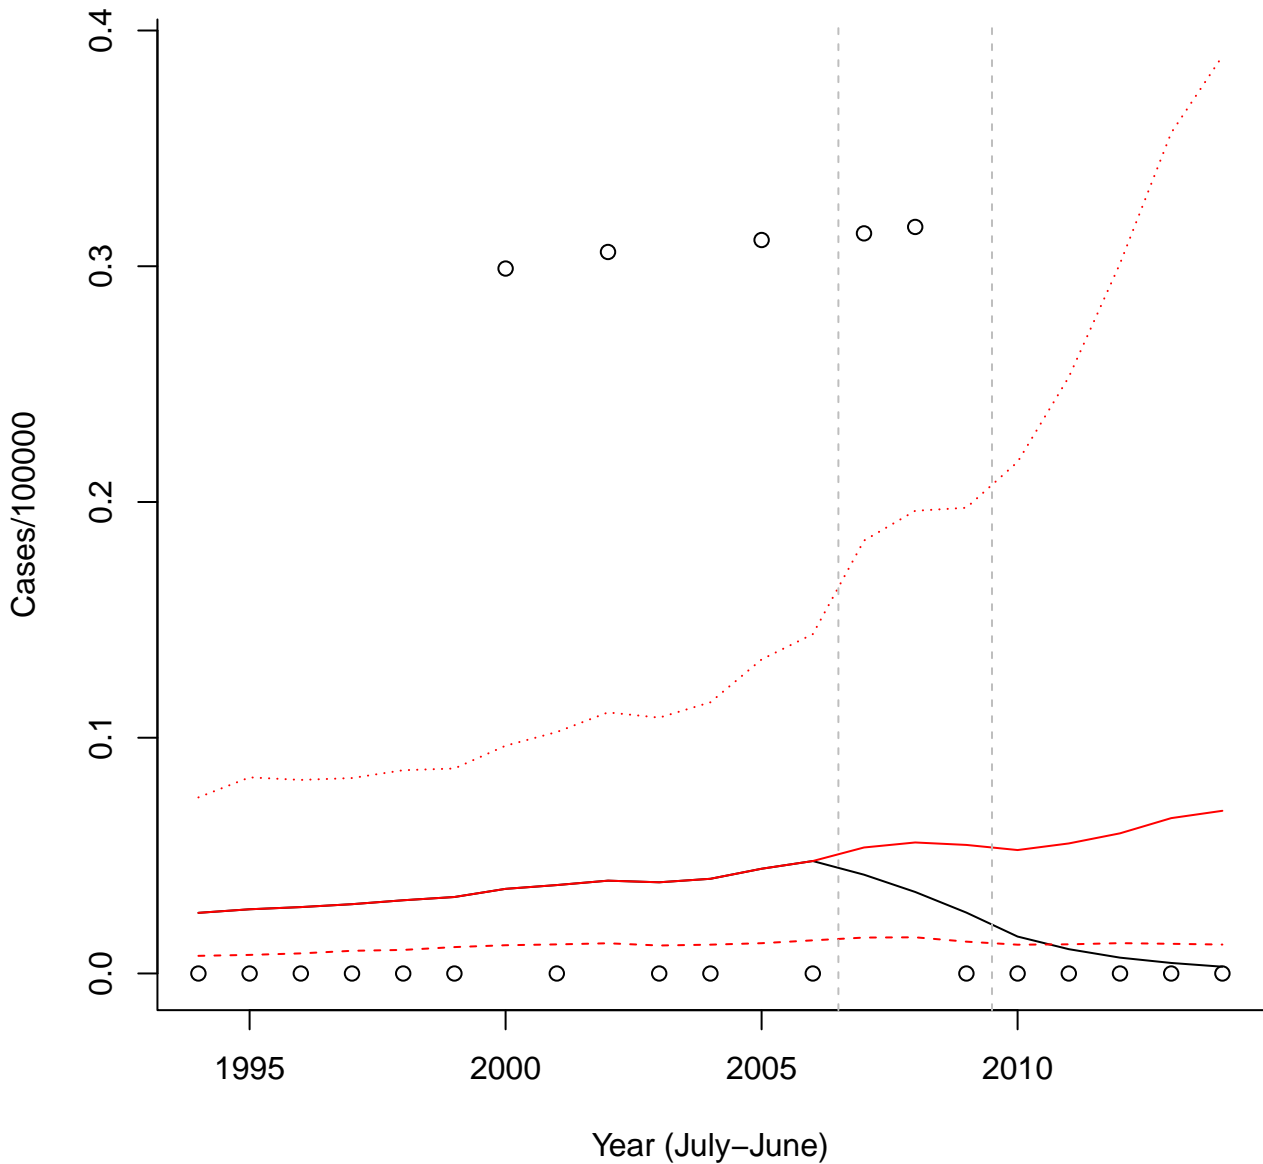

# <5y Without comorbidity Serotype 19A

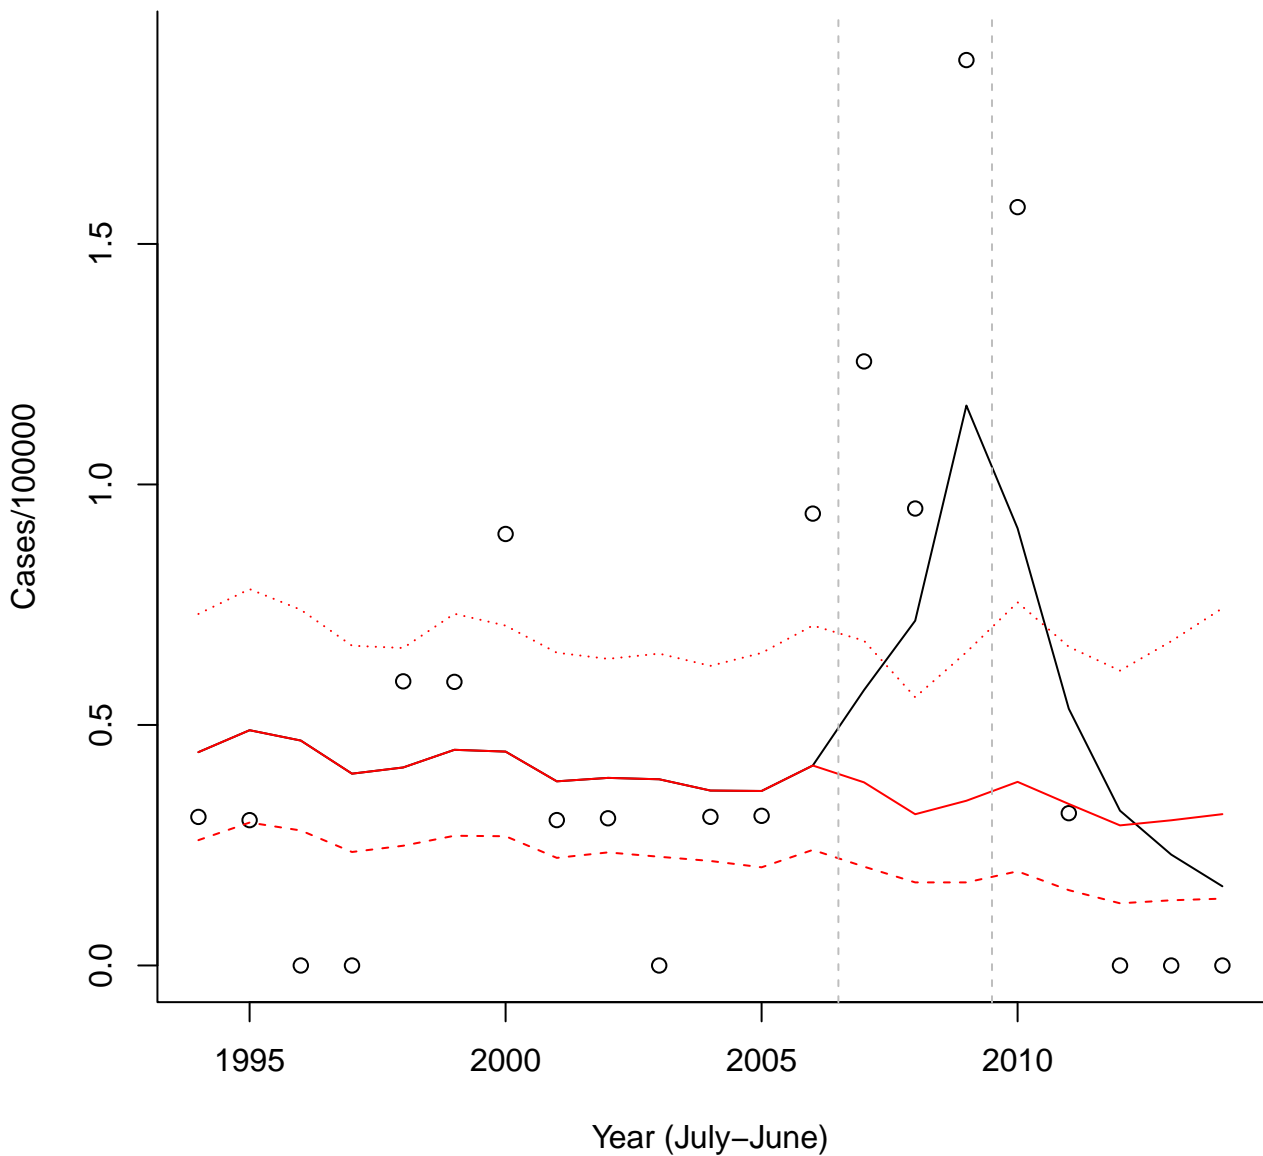



# <5y Without comorbidity Serotype 19F

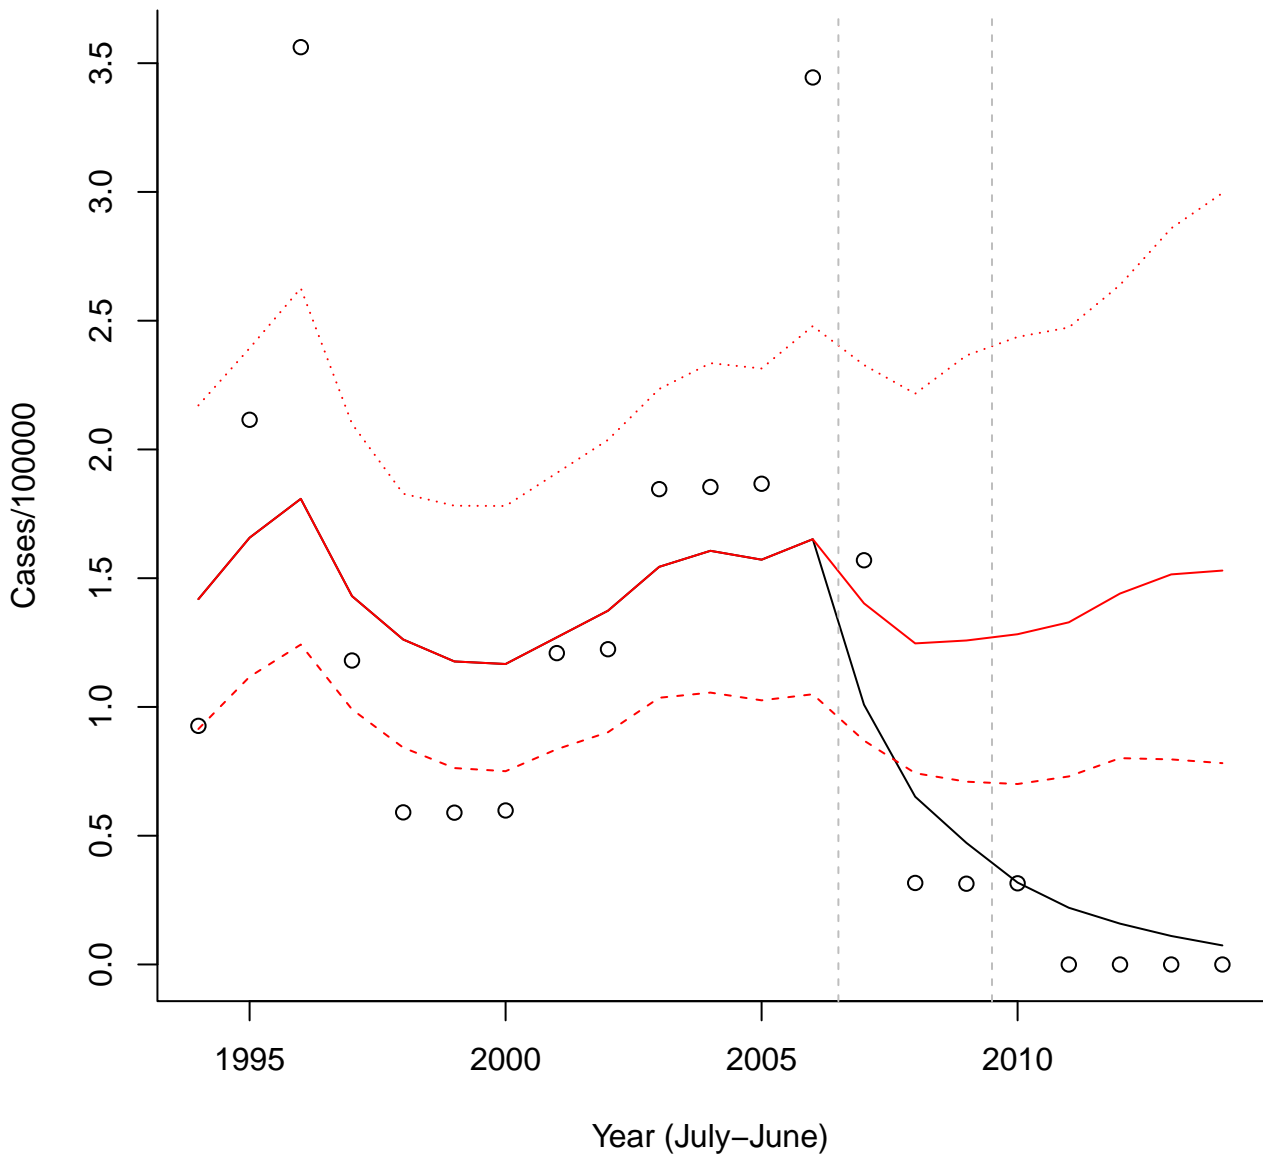

# <5y Without comorbidity Serotype 20

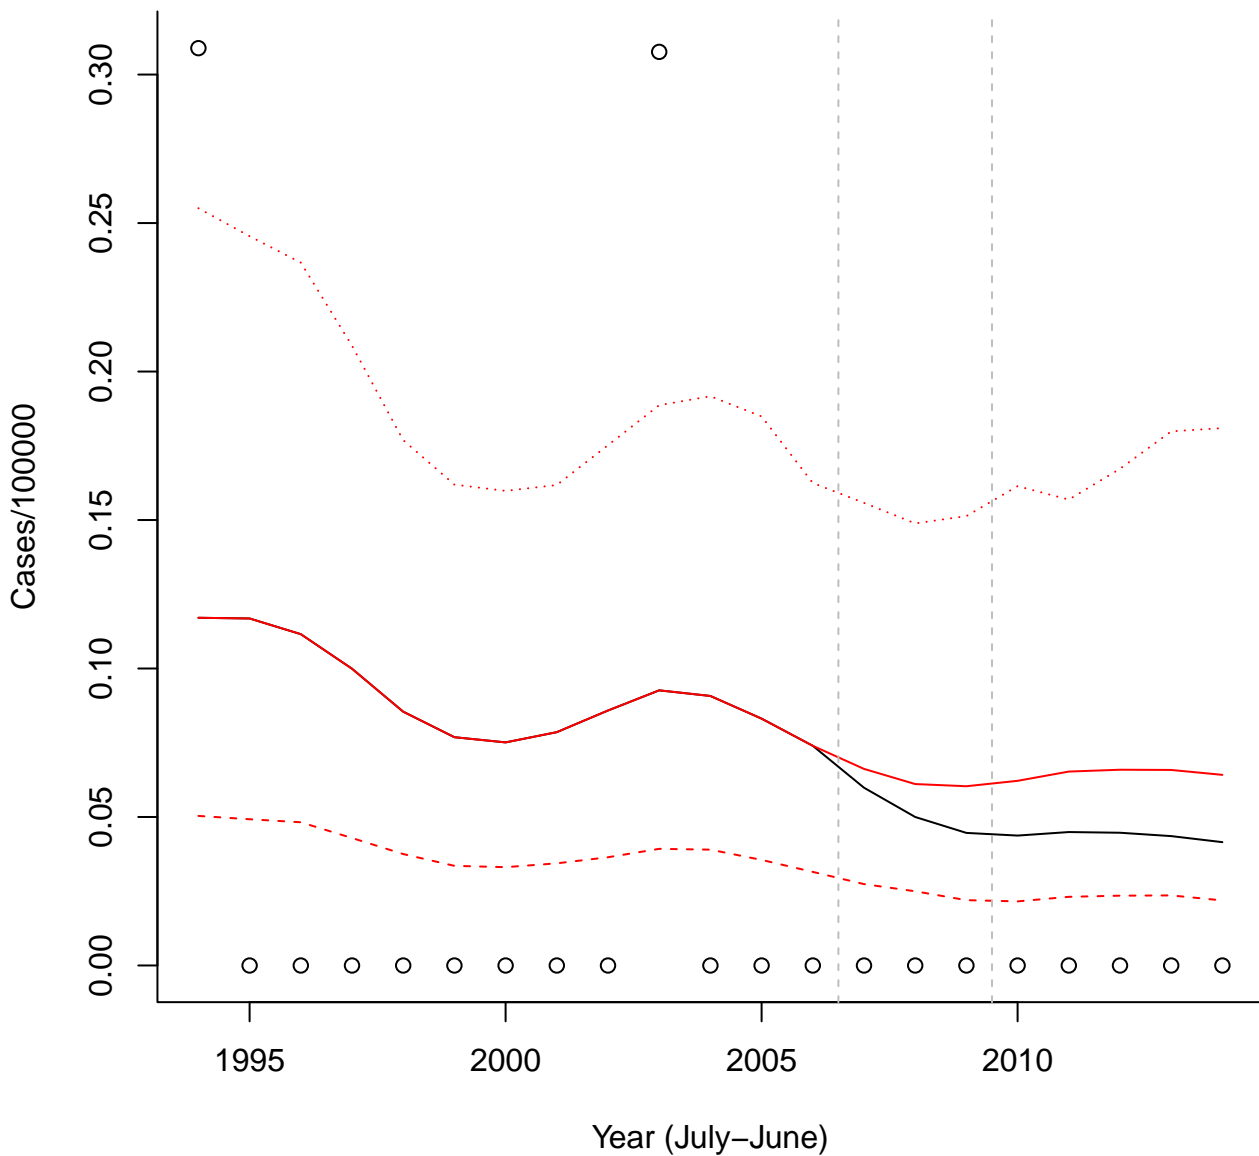

# <5y Without comorbidity Serotype 21

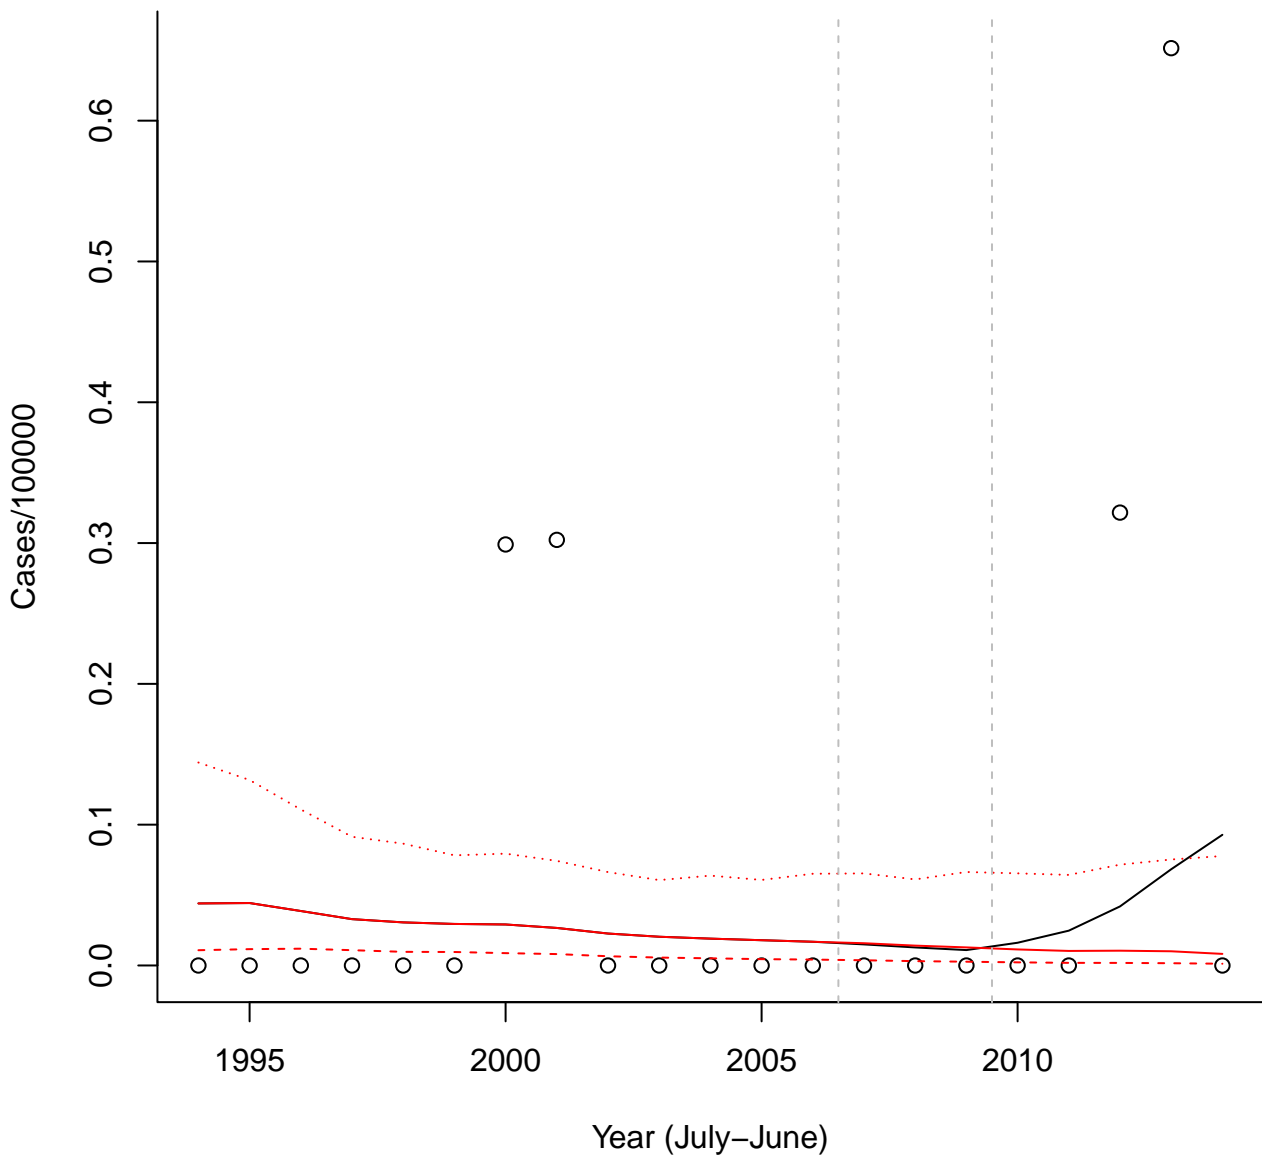

# <5y Without comorbidity Serotype 22F

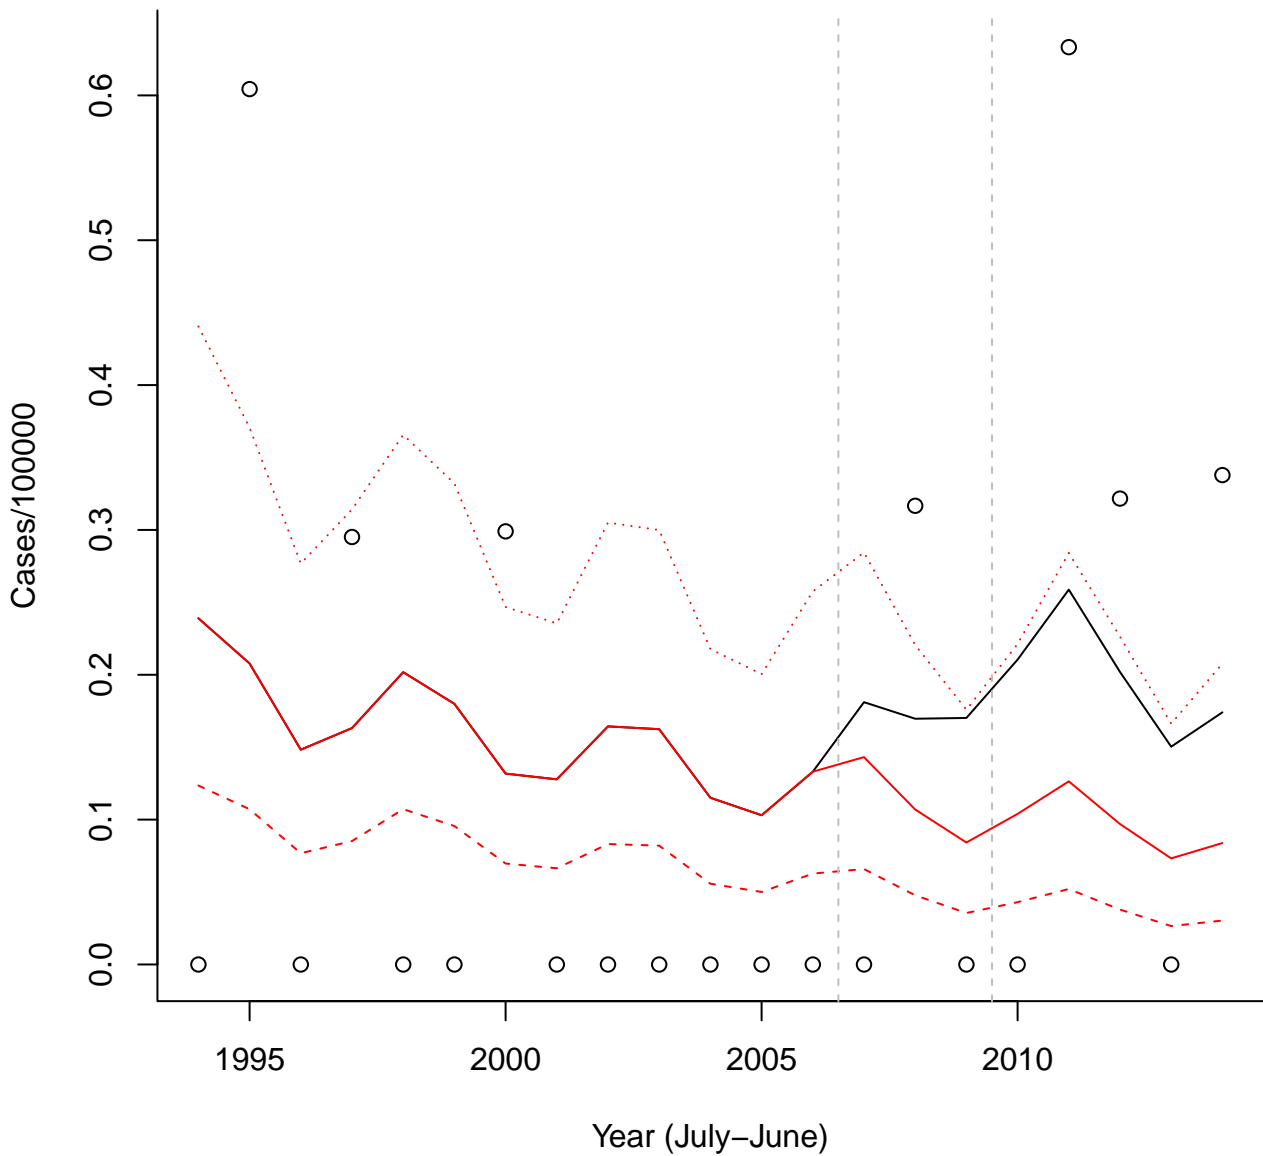

# <5y Without comorbidity Serotype 23B

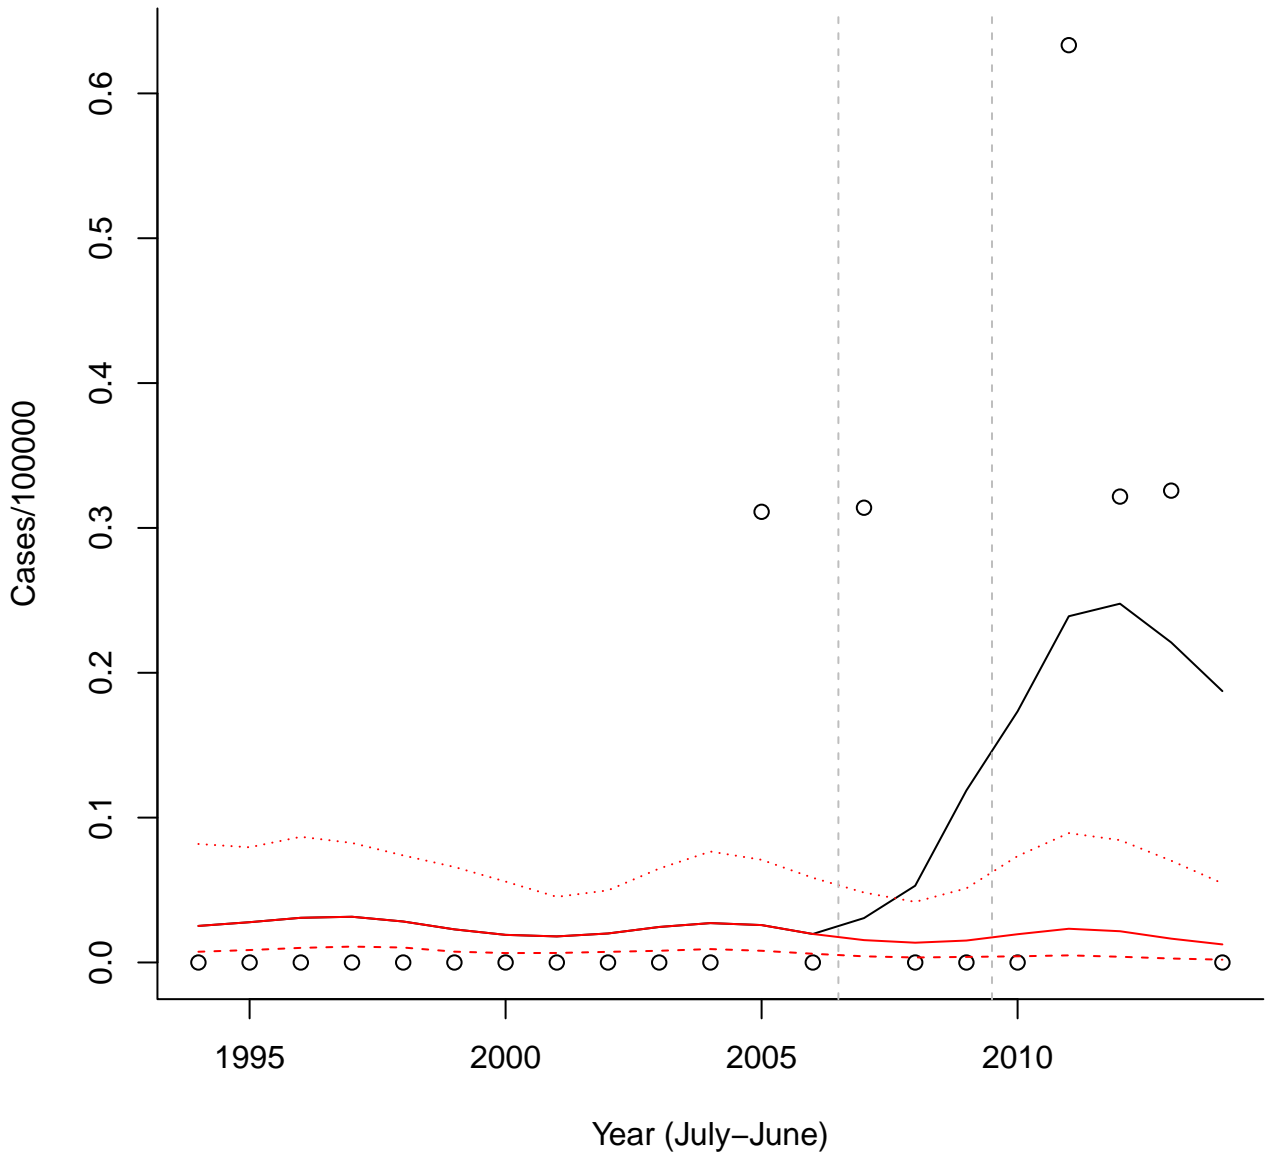

# <5y Without comorbidity Serotype 23F

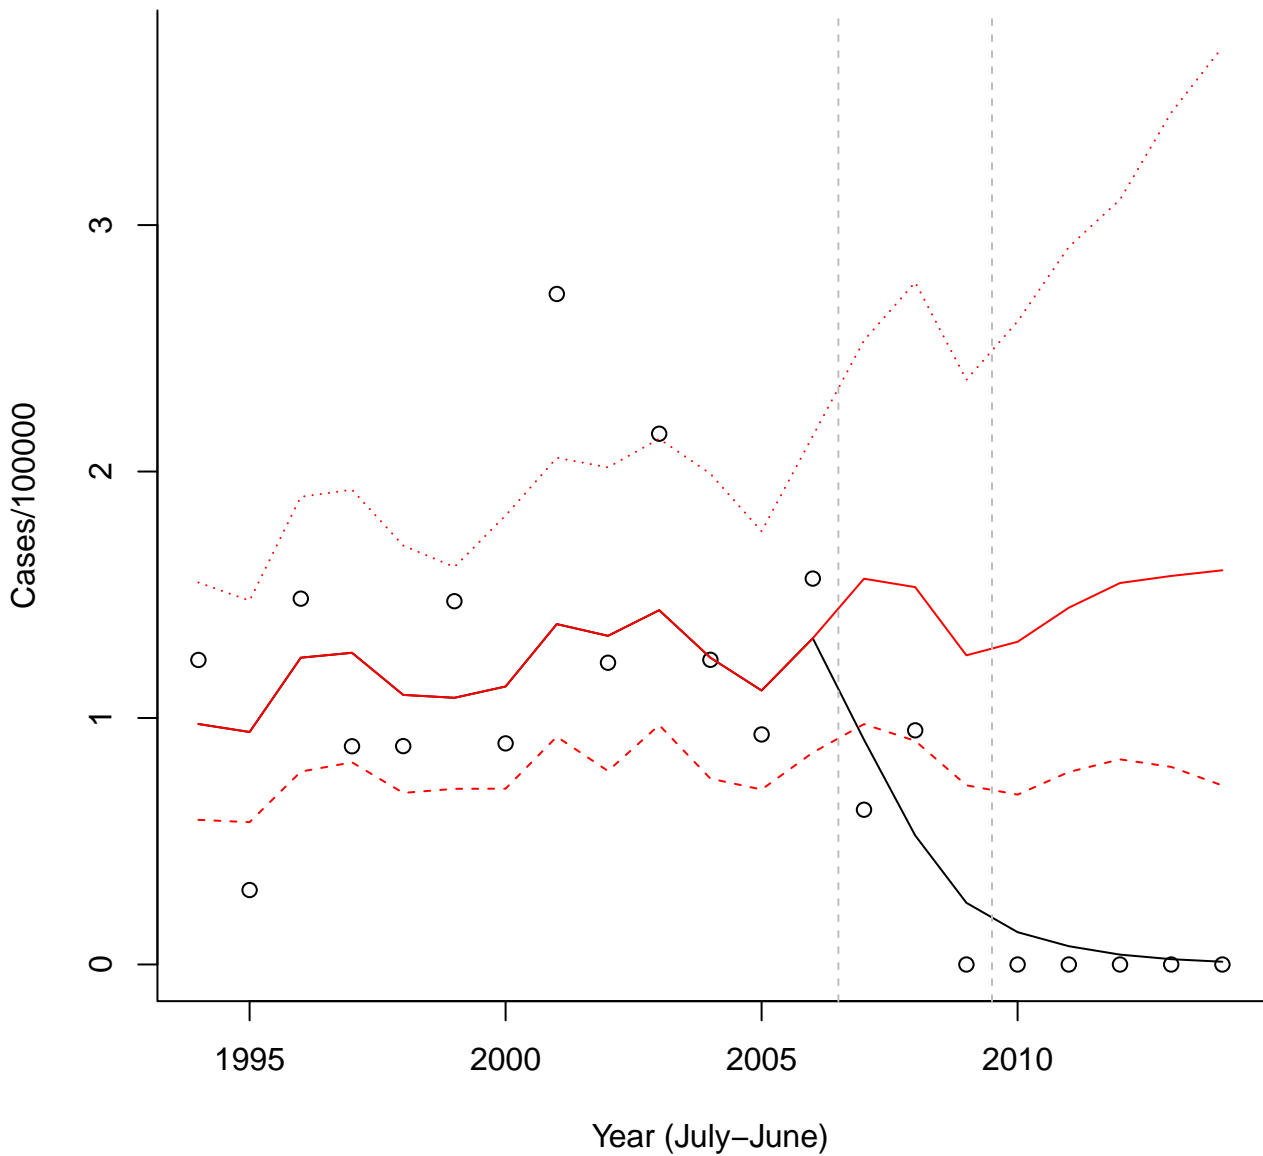

# <5y Without comorbidity Serotype 24B

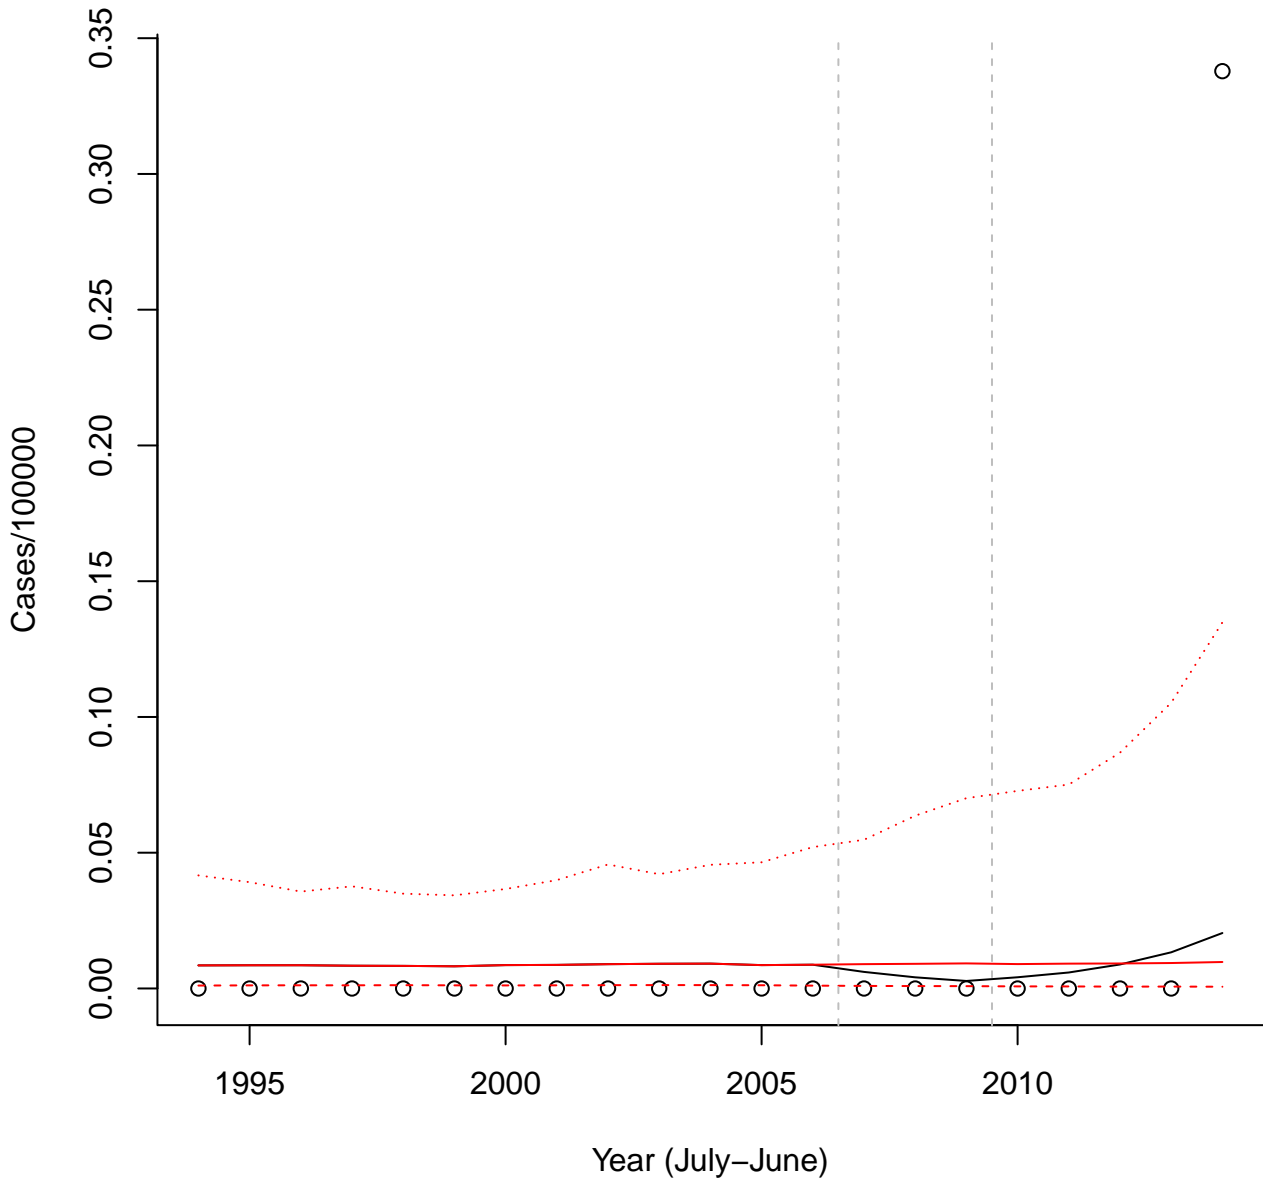

# <5y Without comorbidity Serotype 24F

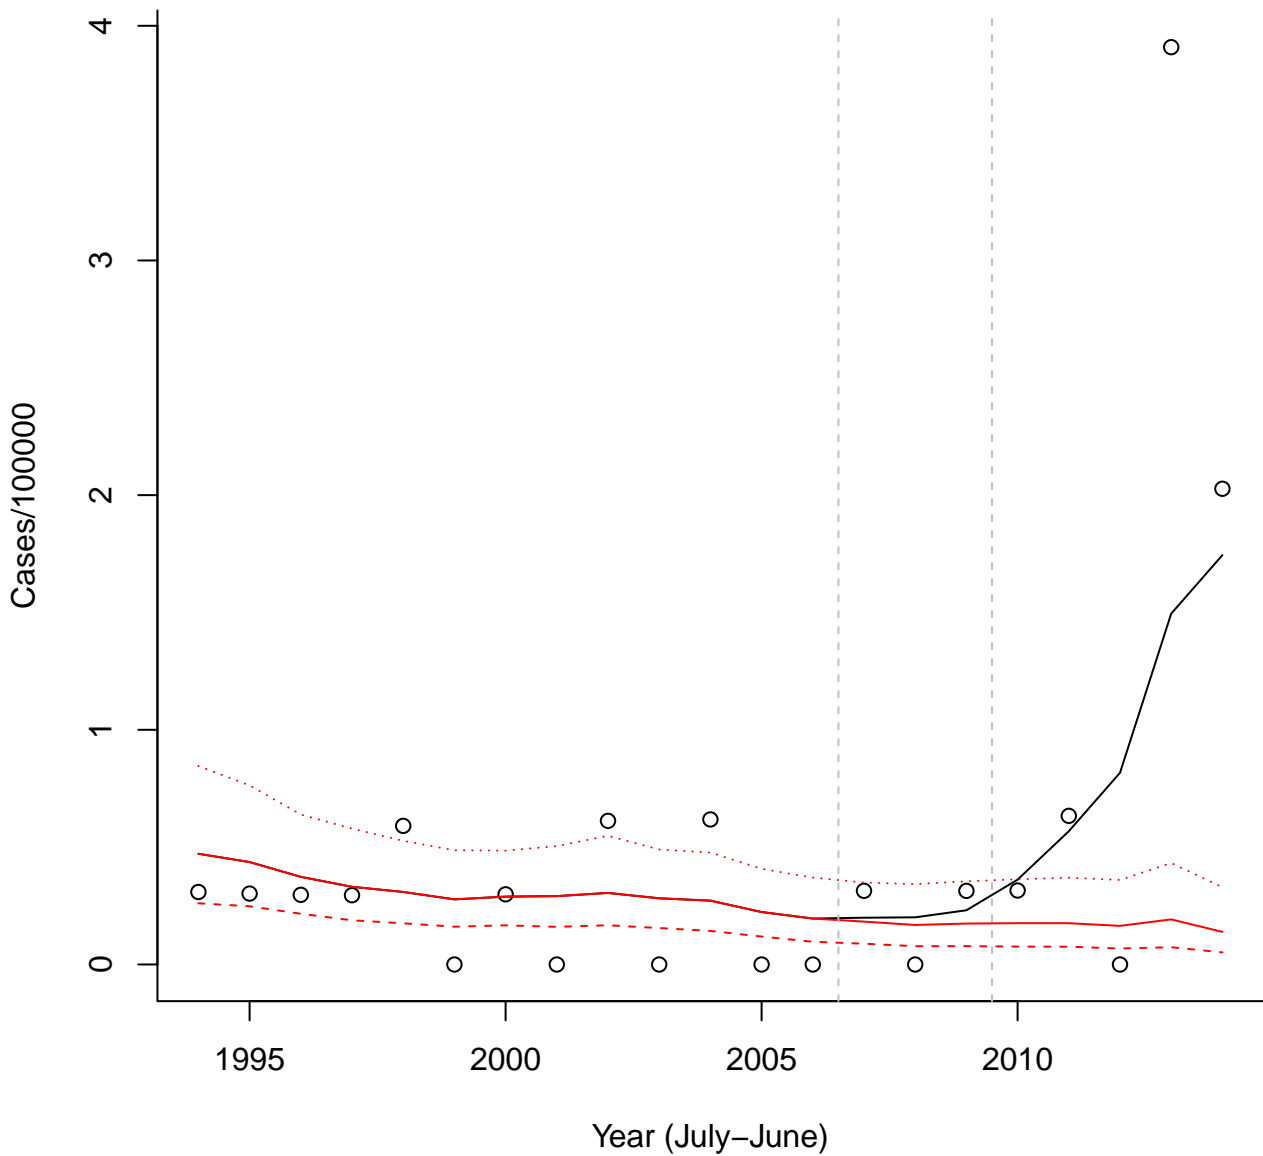



# <5y Without comorbidity Serotype 27

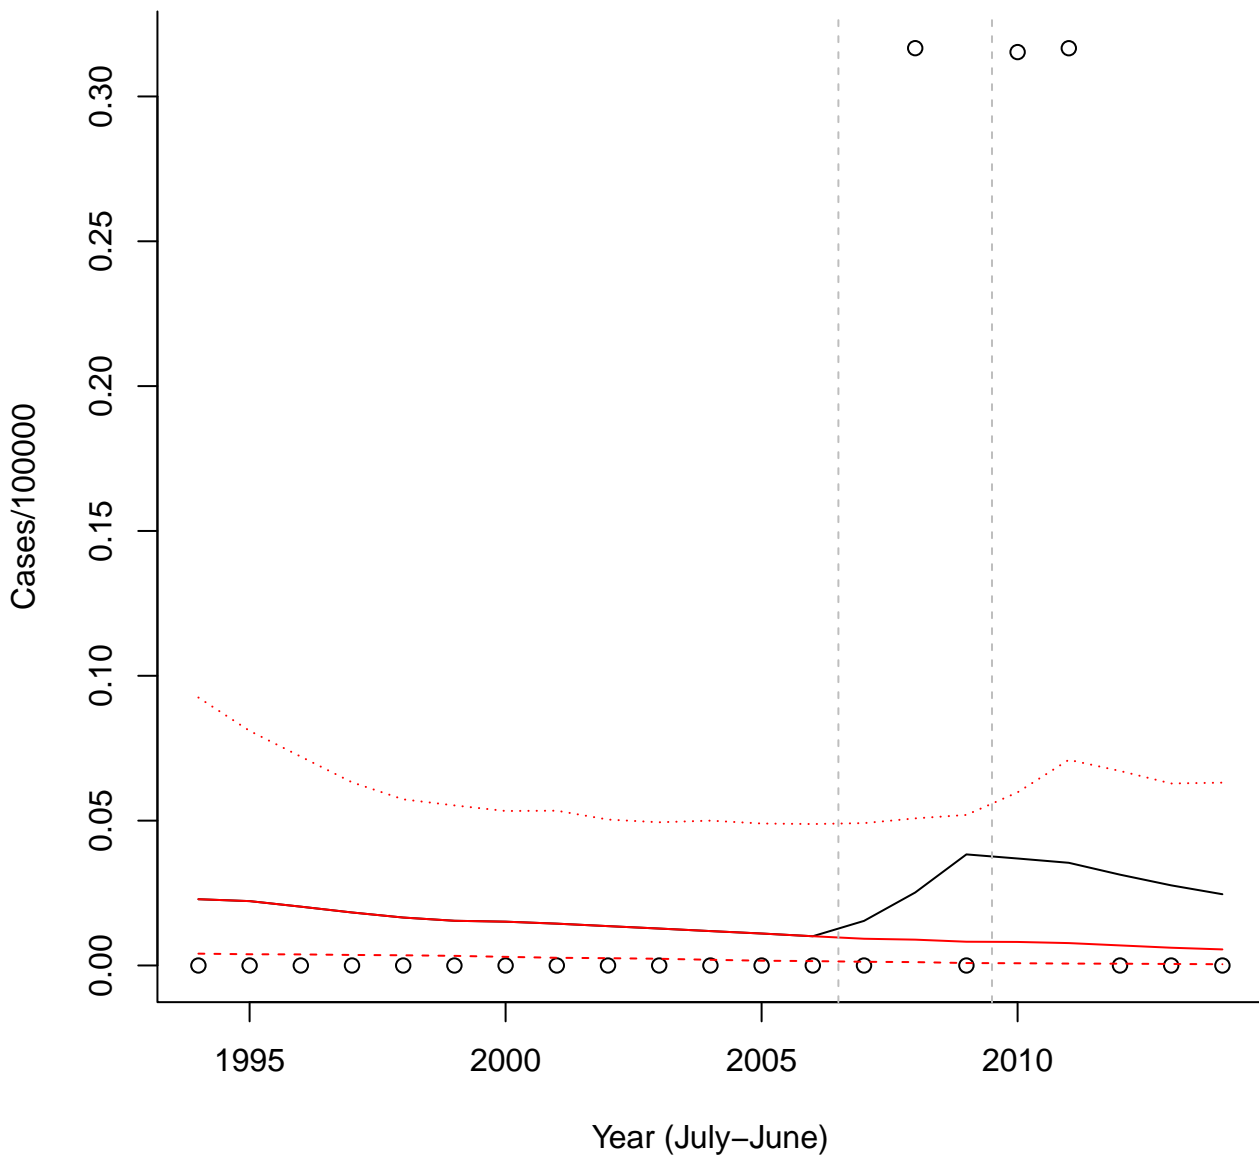

# <5y Without comorbidity Serotype 28F

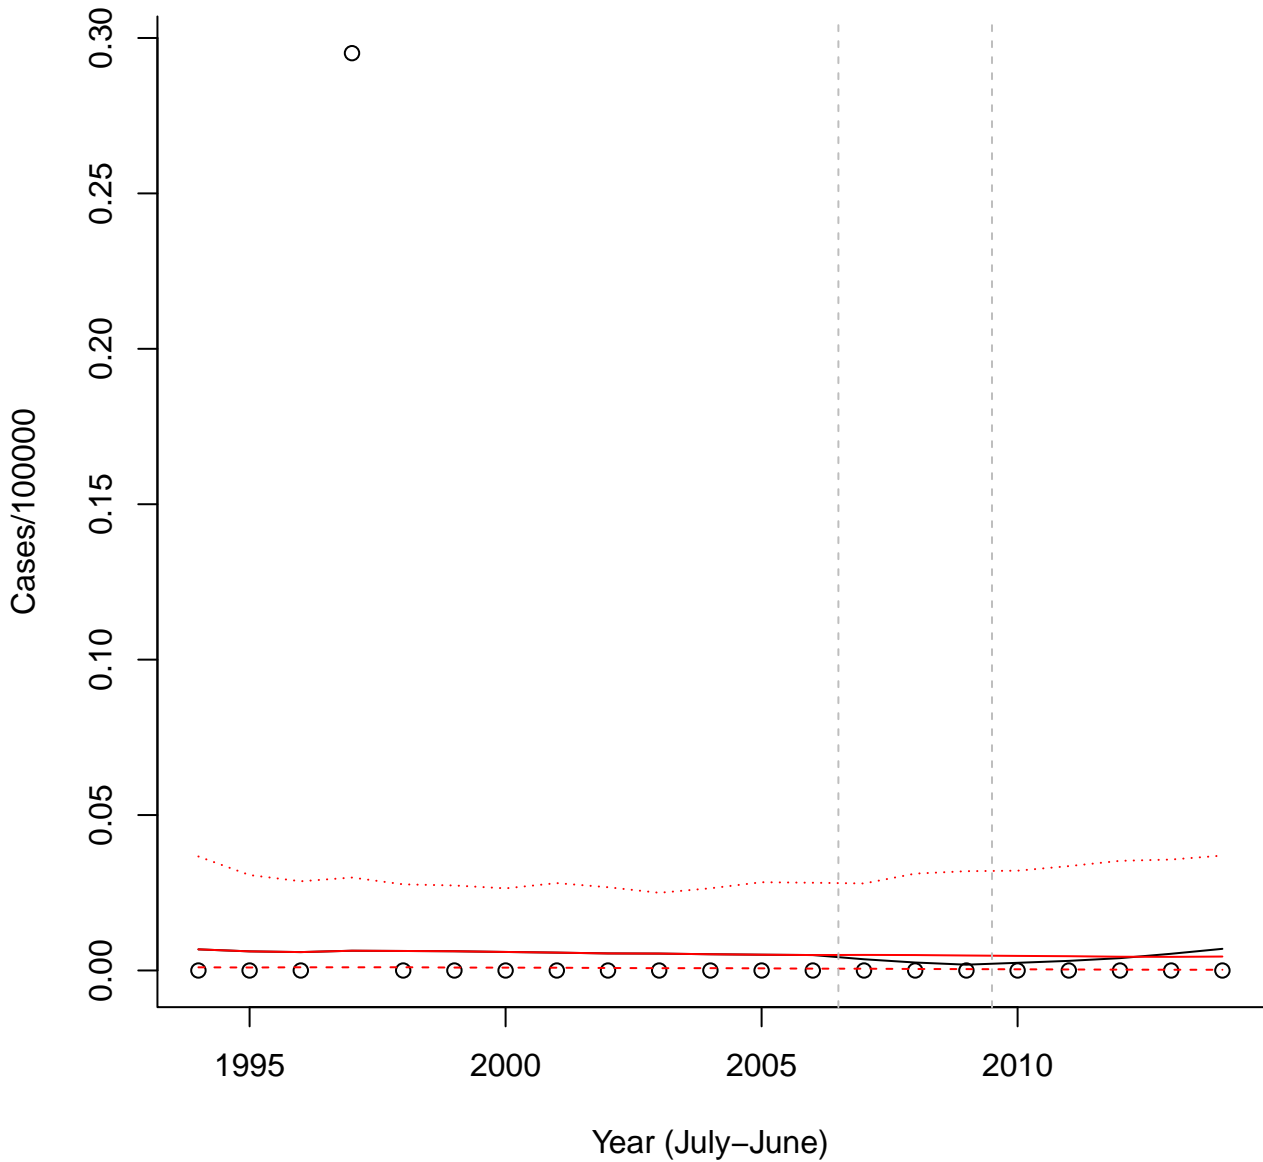



# <5y Without comorbidity Serotype 33F

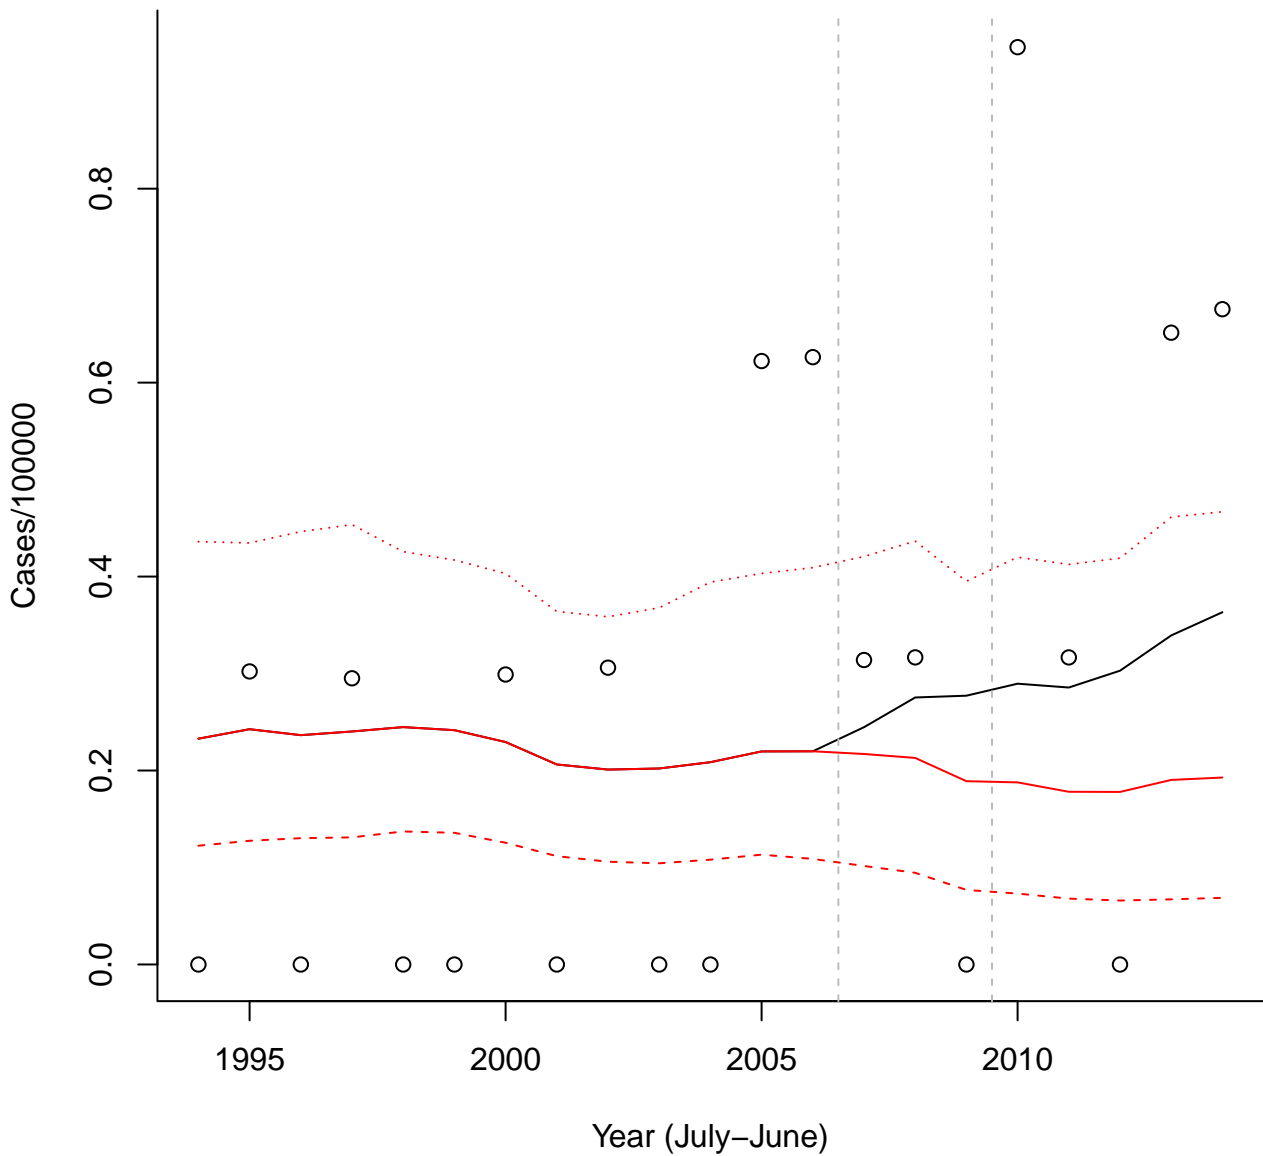

# <5y Without comorbidity Serotype 34

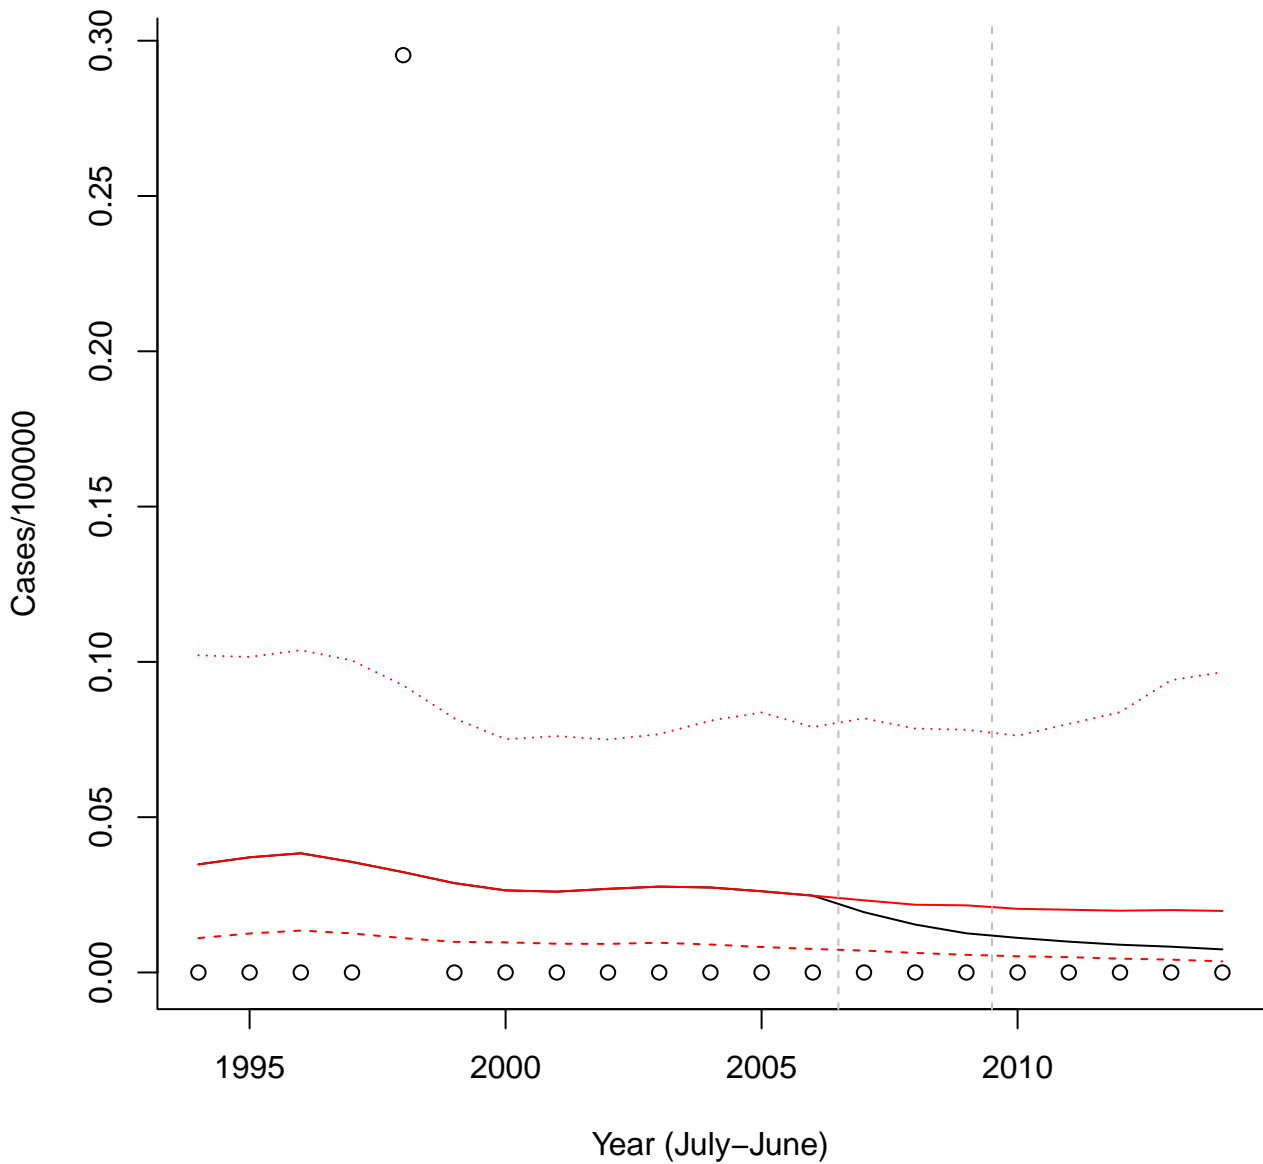

# <5y Without comorbidity Serotype 35B

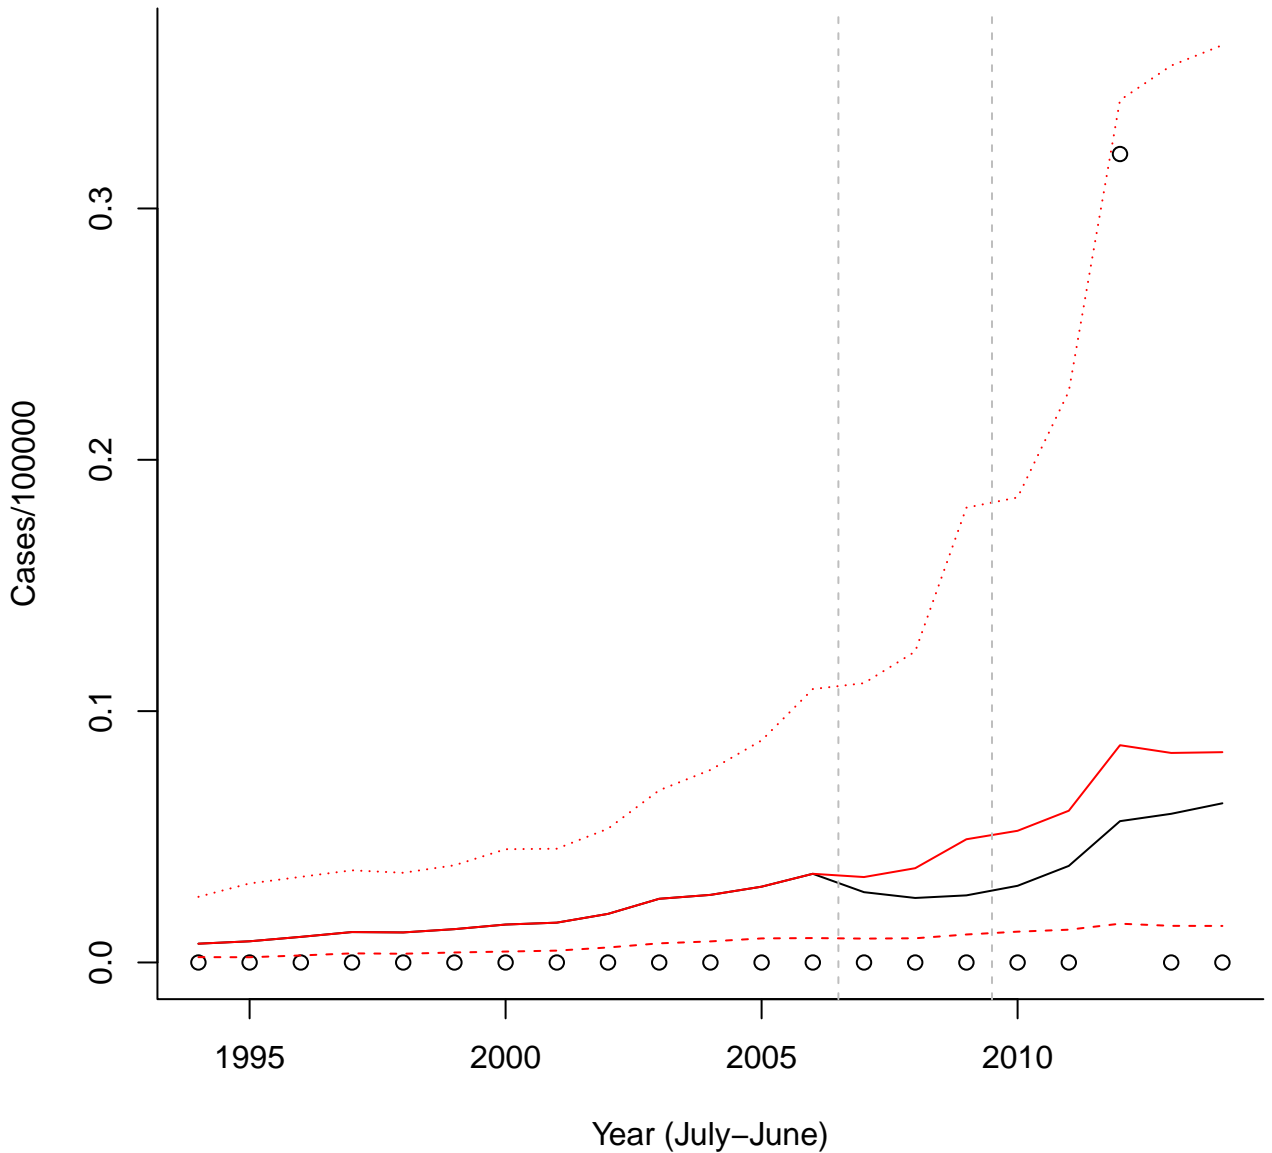

# <5y Without comorbidity Serotype 35F

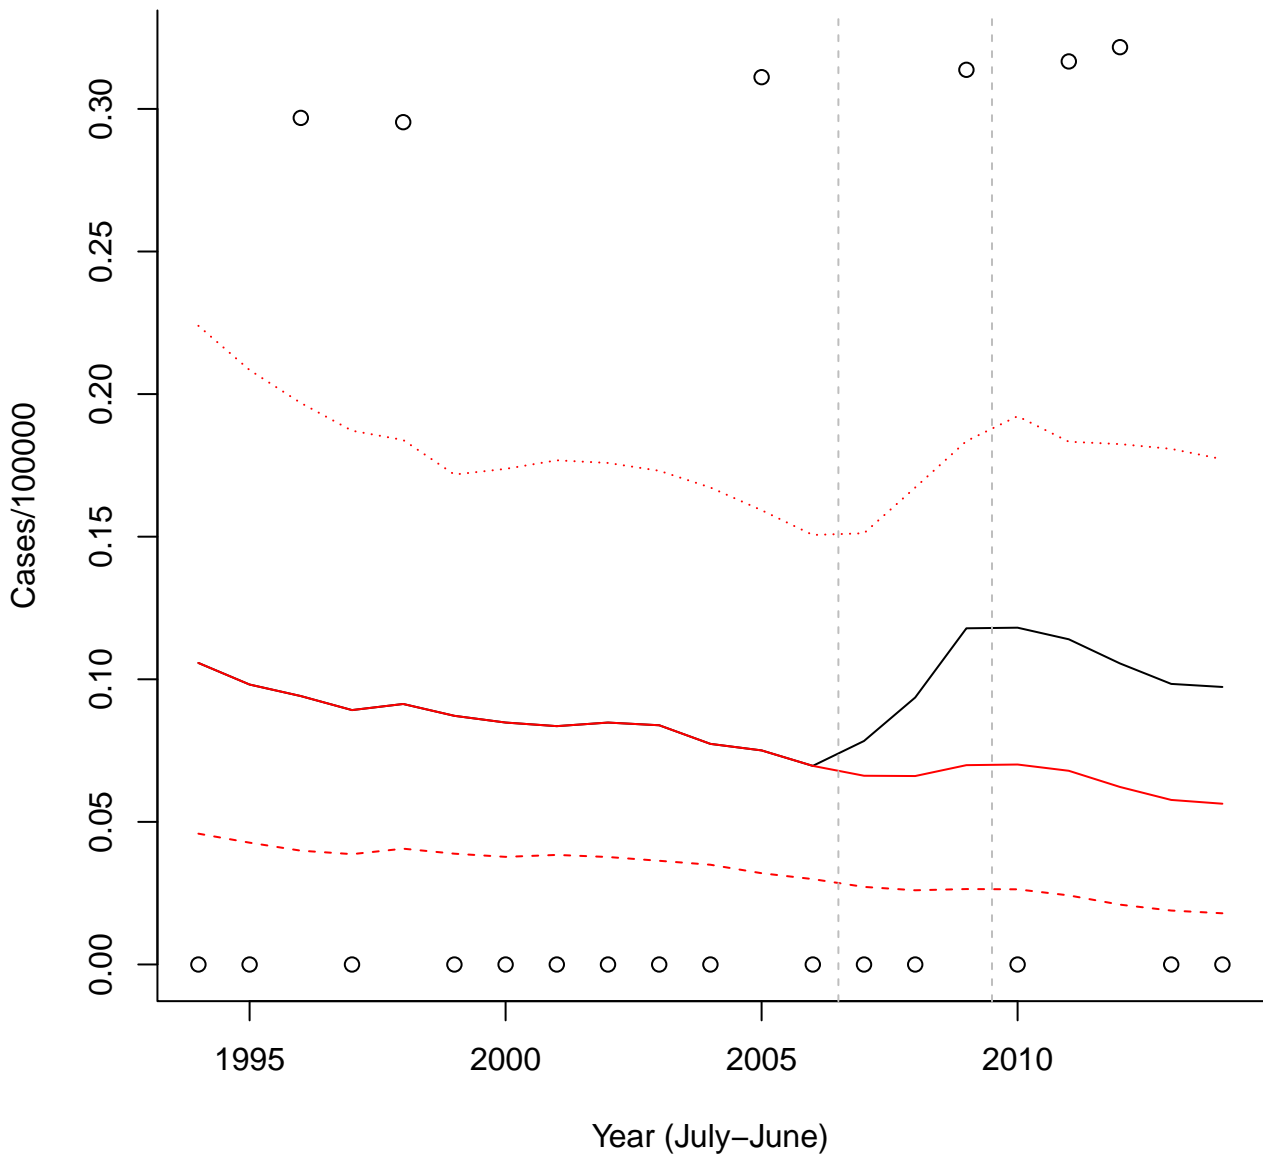

# <5y Without comorbidity Serotype 38

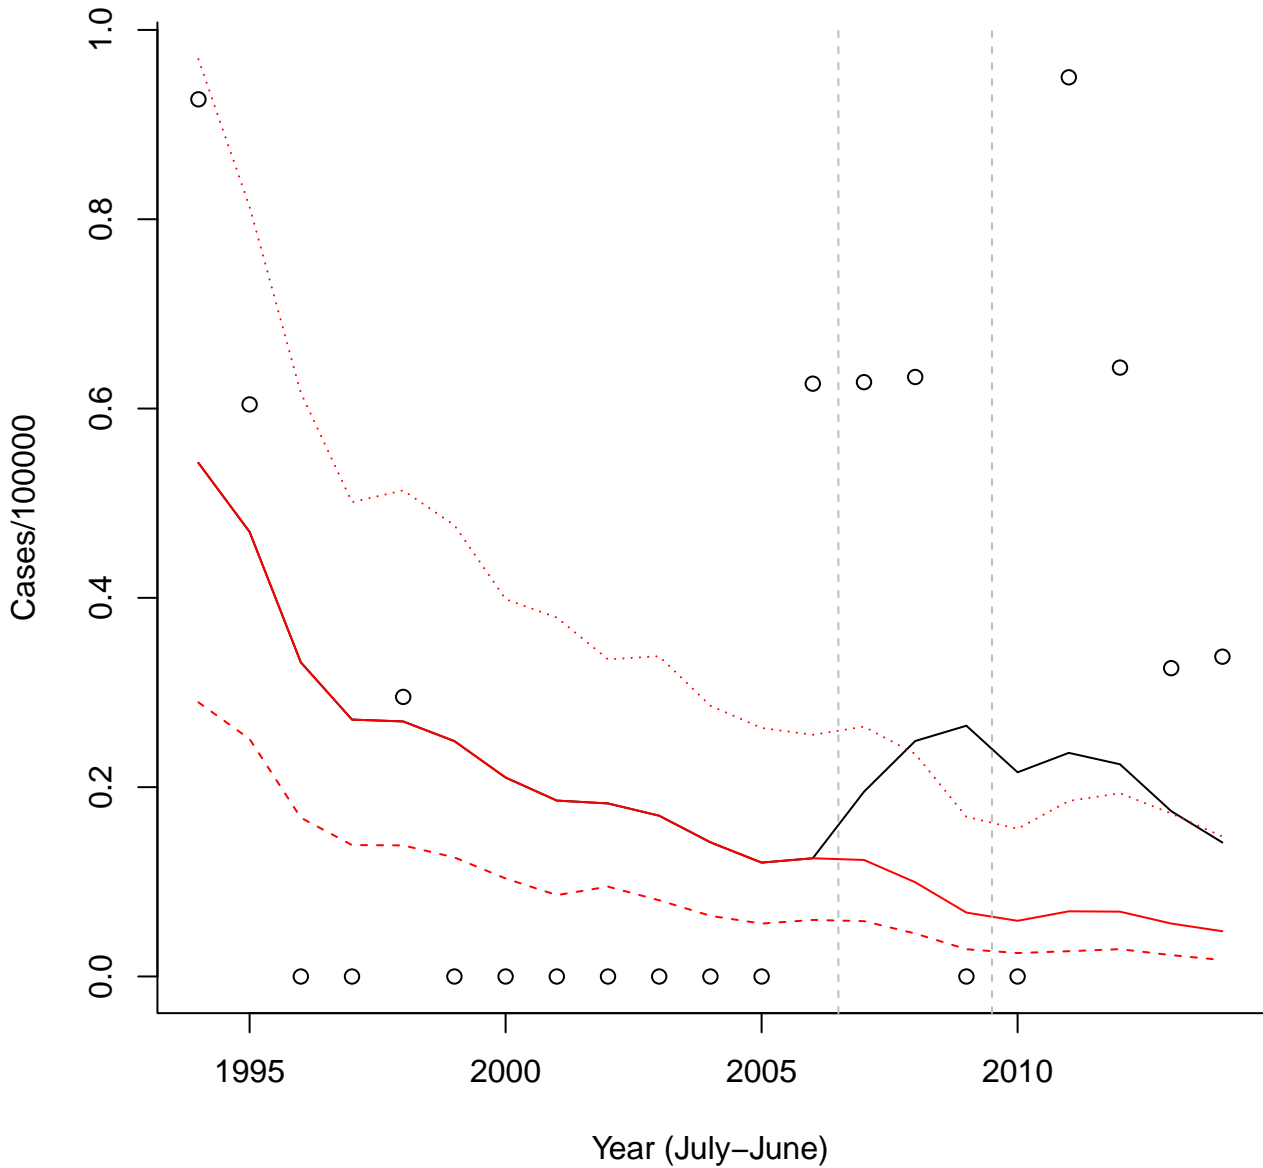



# <5y Without comorbidity Serotype 4

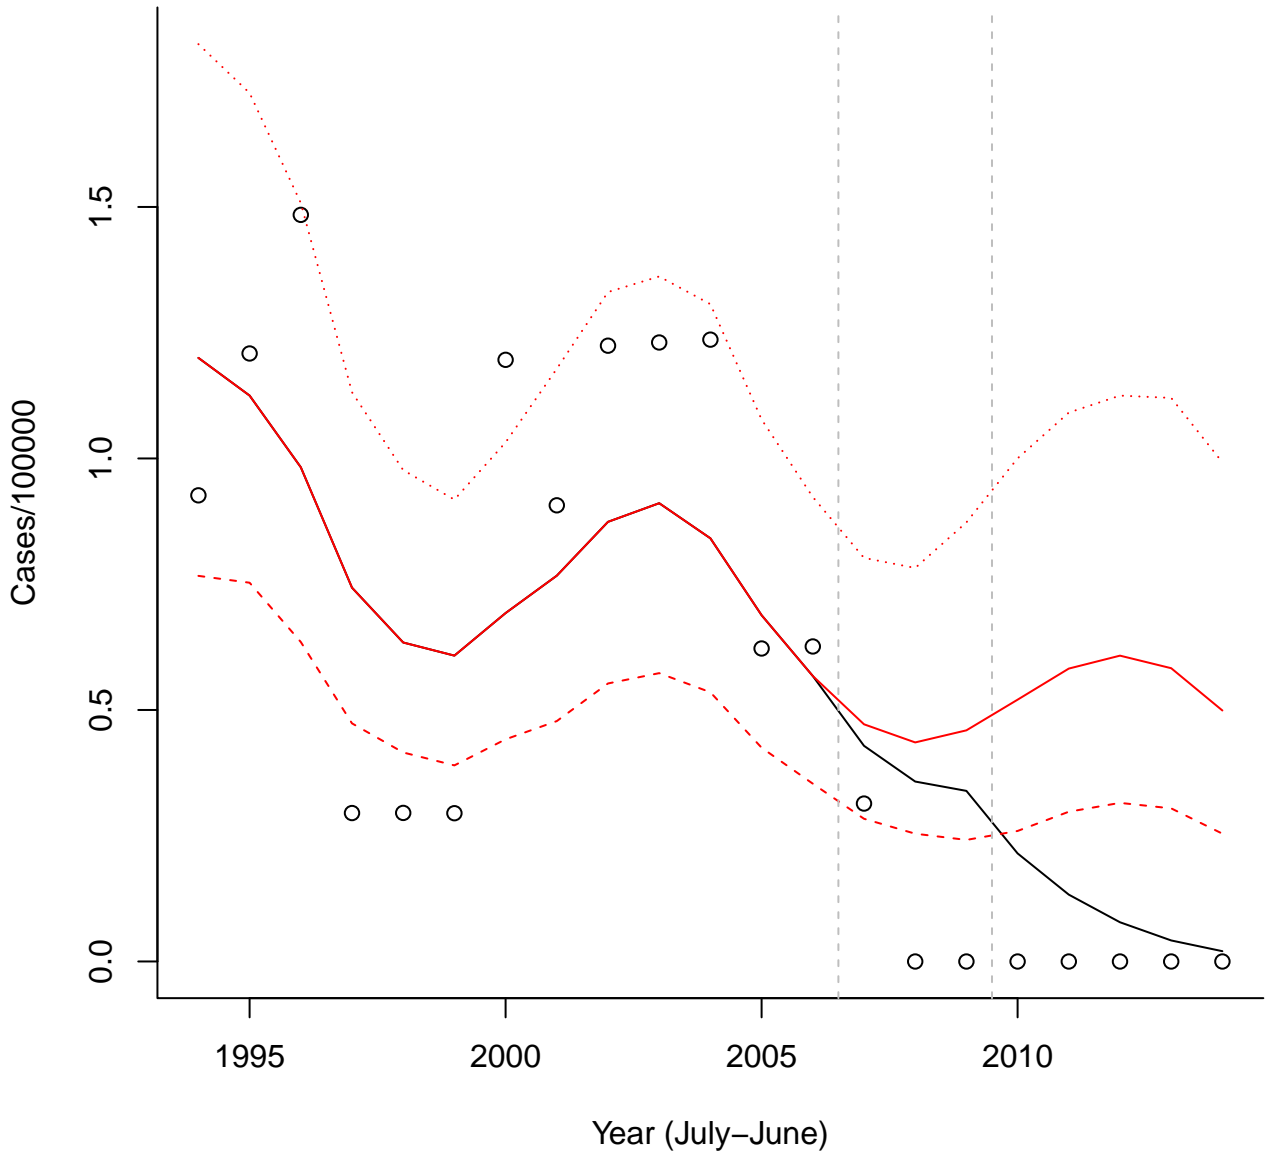

# <5y Without comorbidity Serotype 46

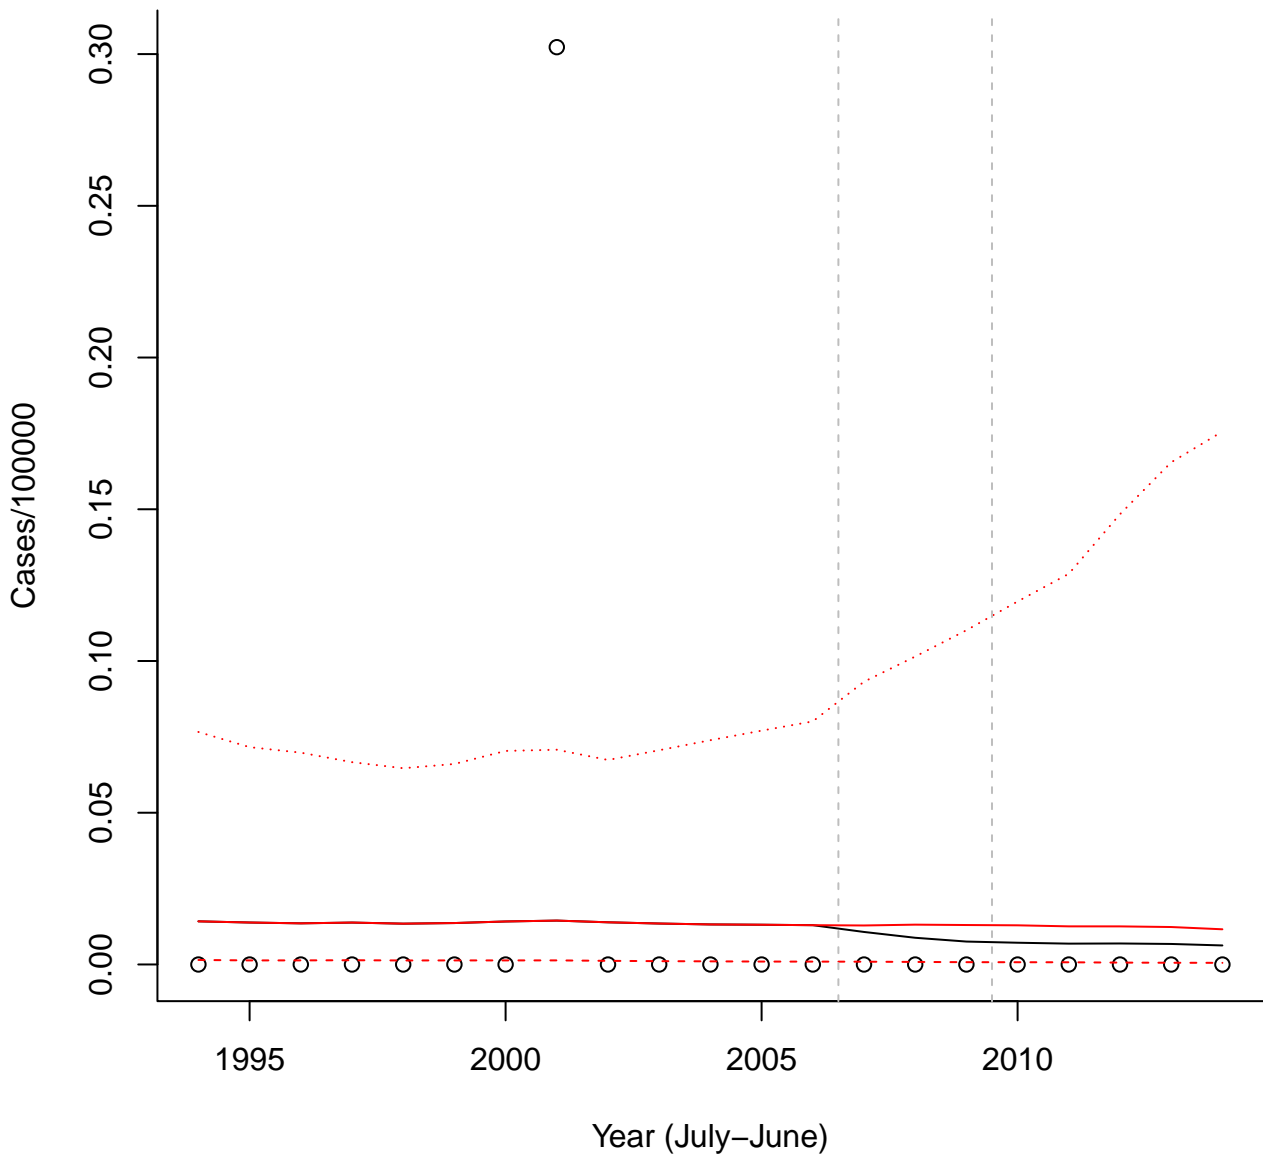

# <5y Without comorbidity Serotype 5

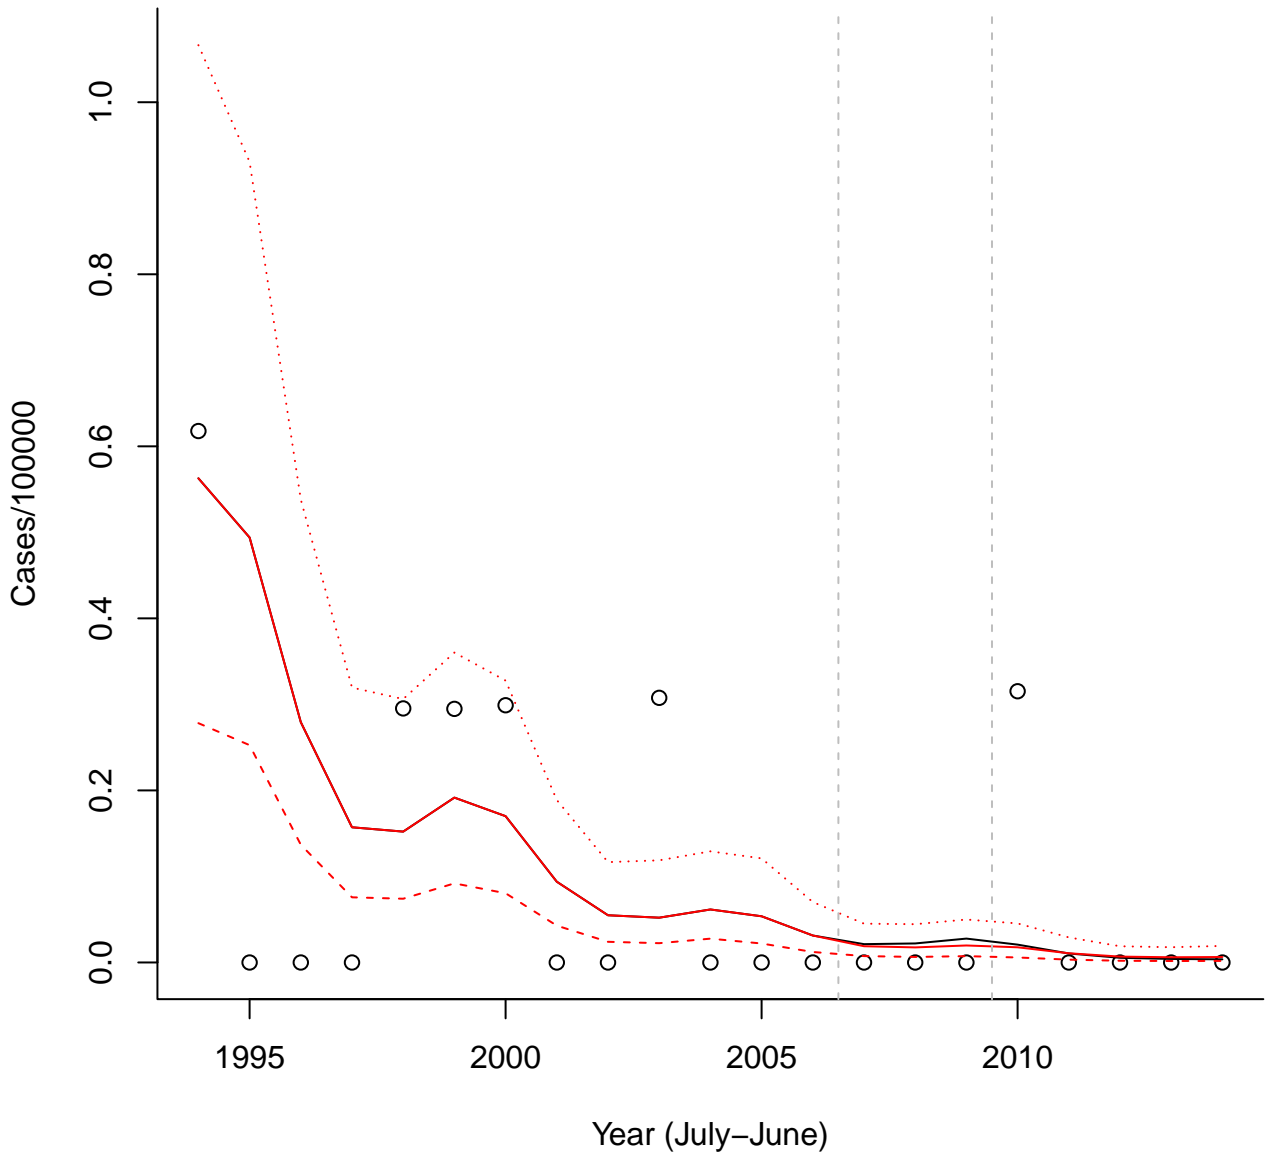

# <5y Without comorbidity Serotype 6A

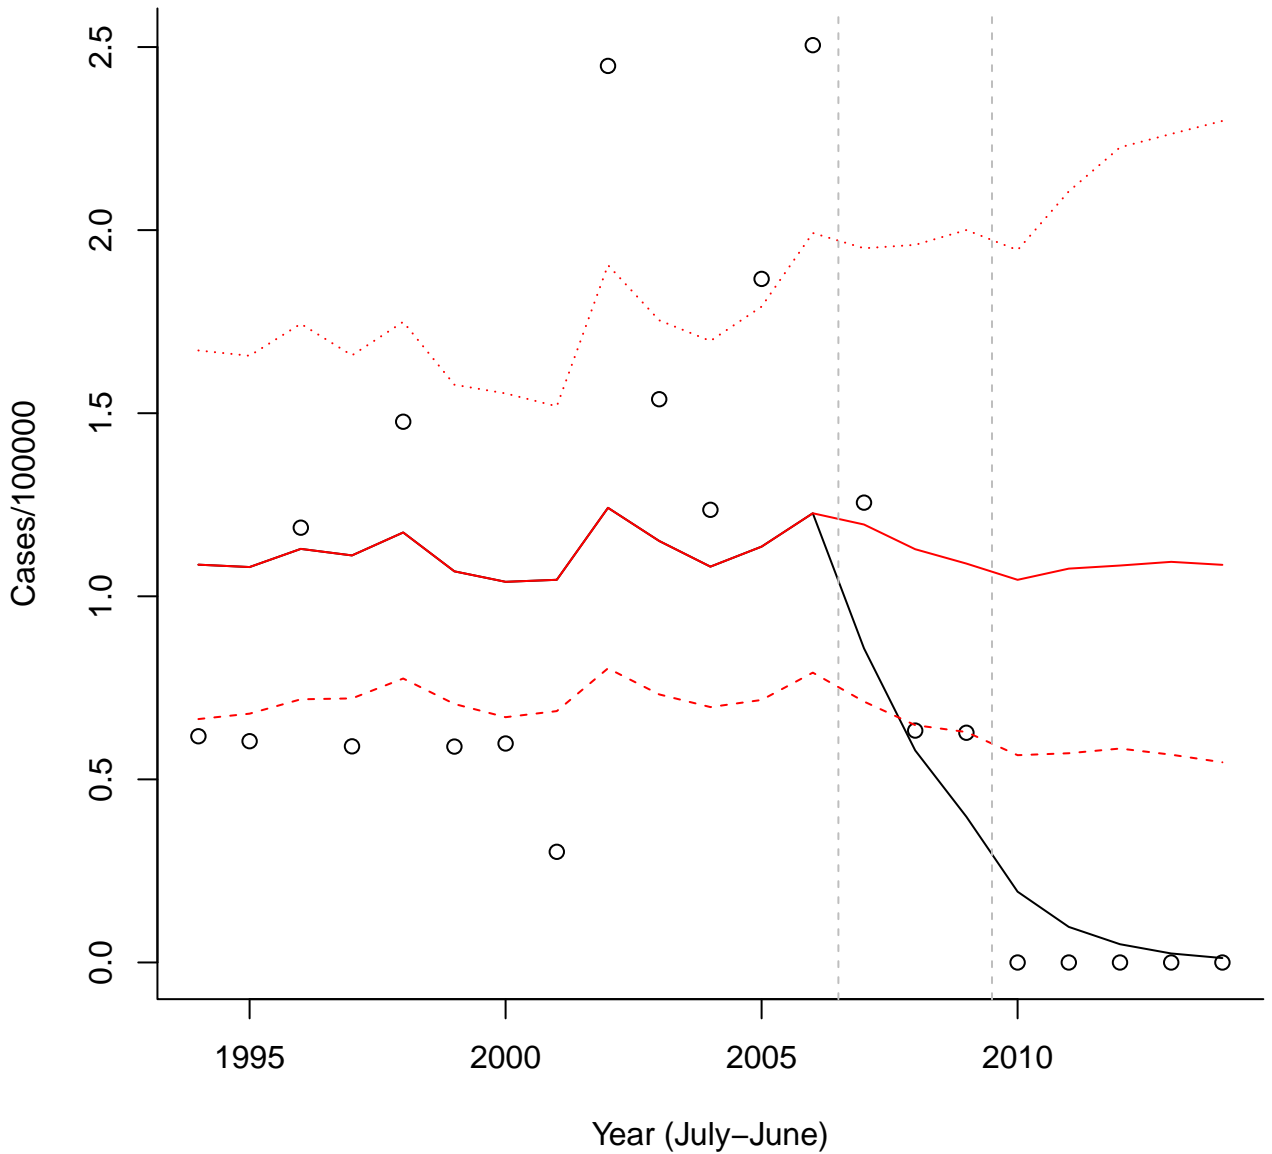

# <5y Without comorbidity Serotype 6B

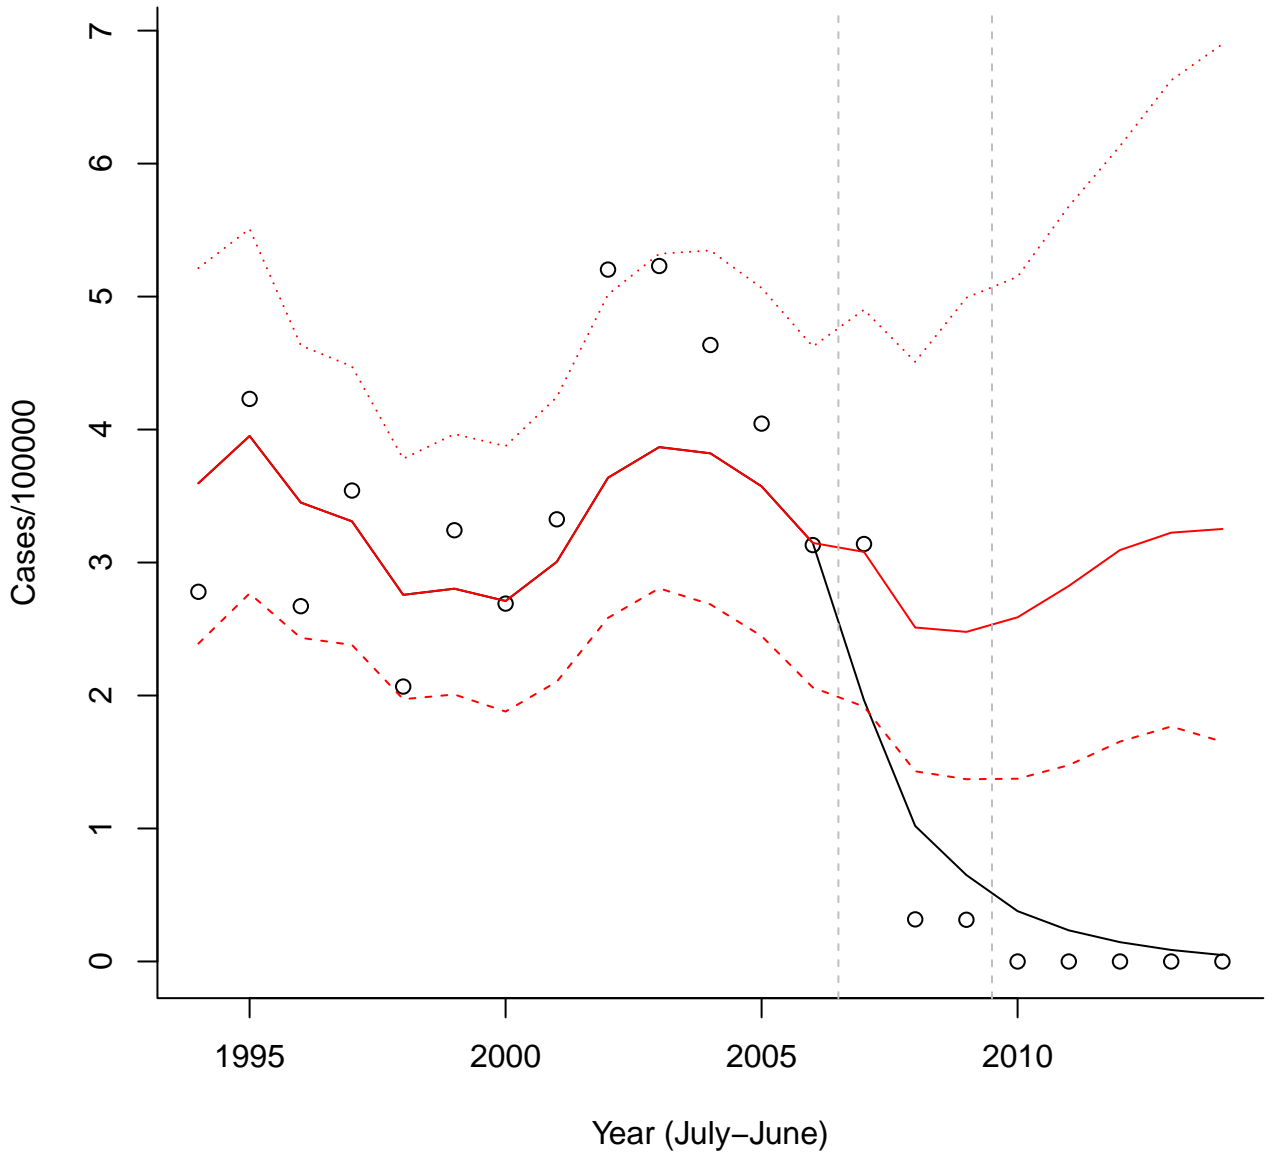

# <5y Without comorbidity Serotype 6C

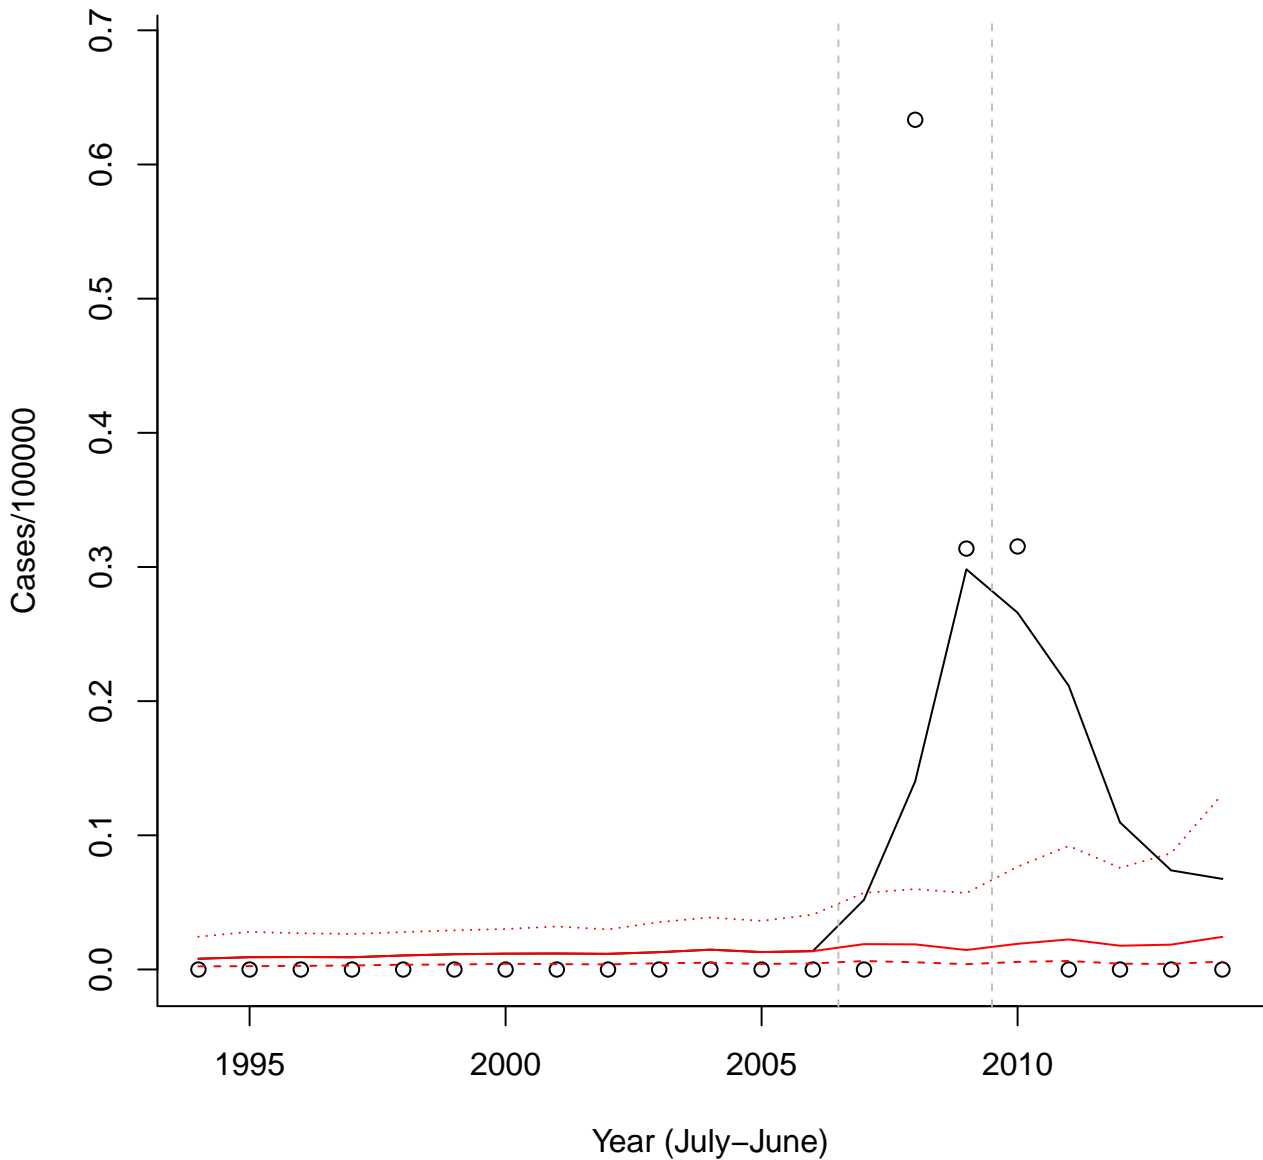

# <5y Without comorbidity Serotype 7F

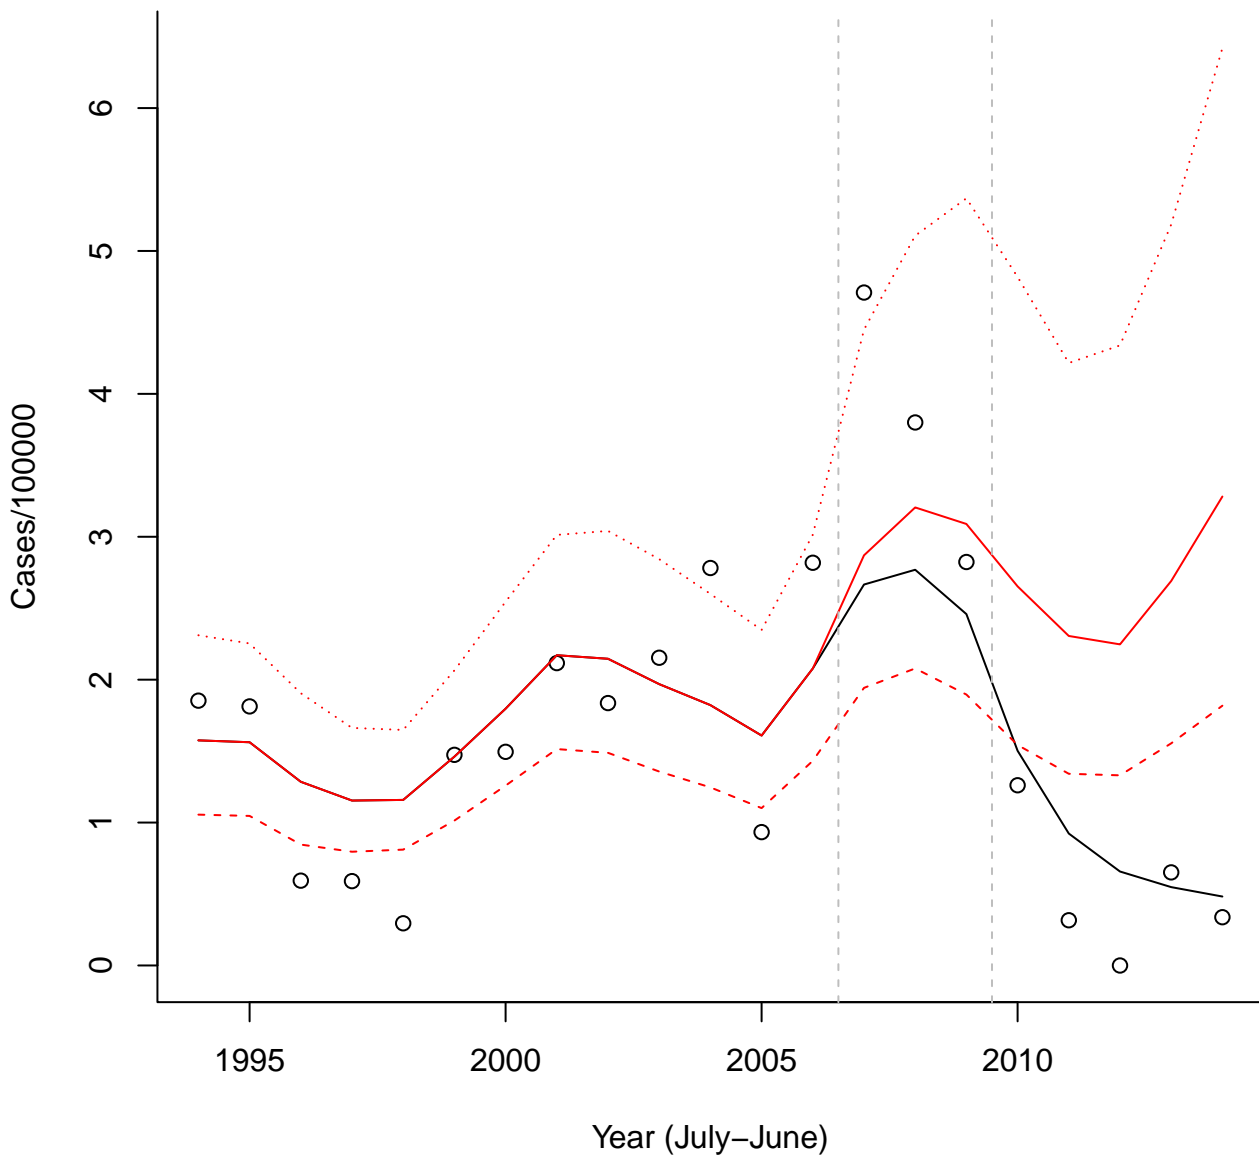

# <5y Without comorbidity Serotype 8

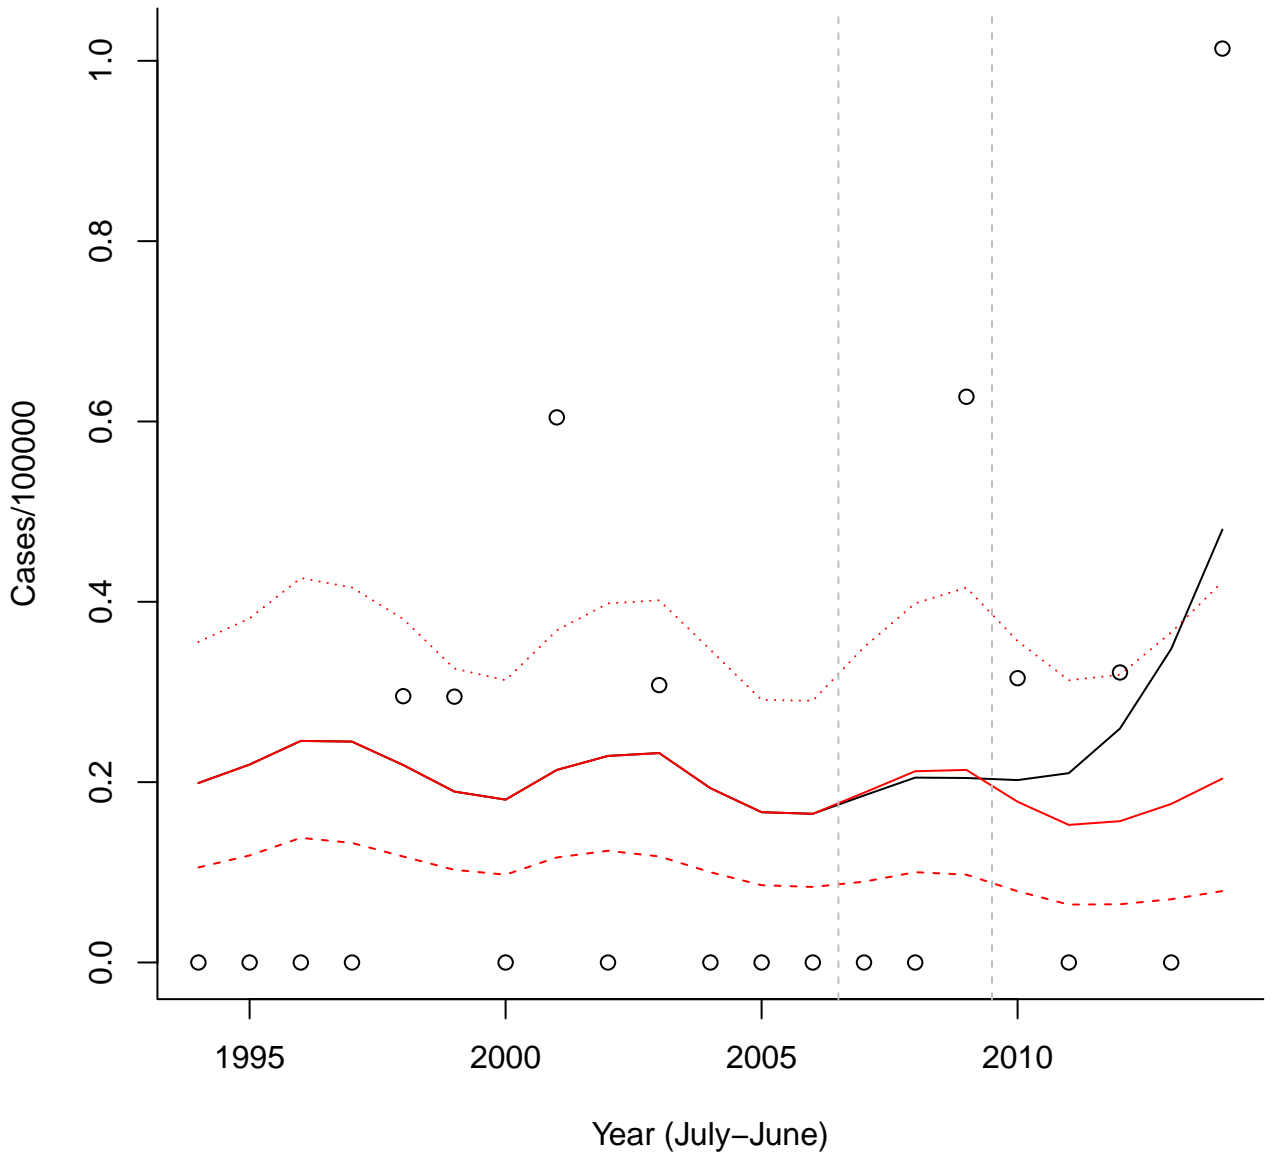



# <5y Without comorbidity Serotype 9A

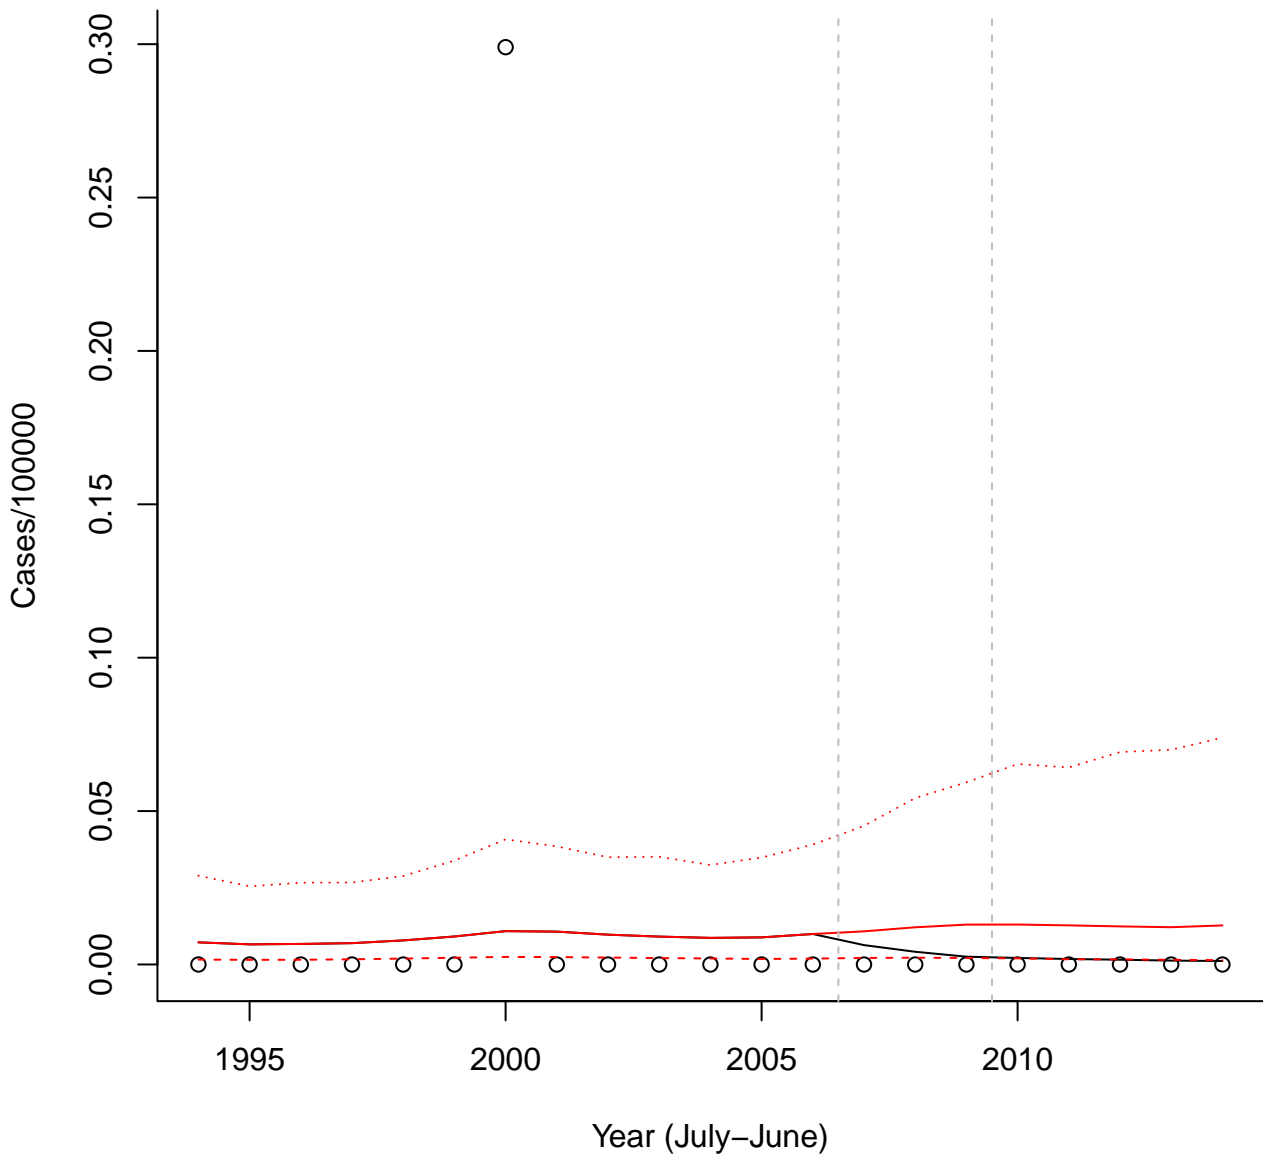

# <5y Without comorbidity Serotype 9N

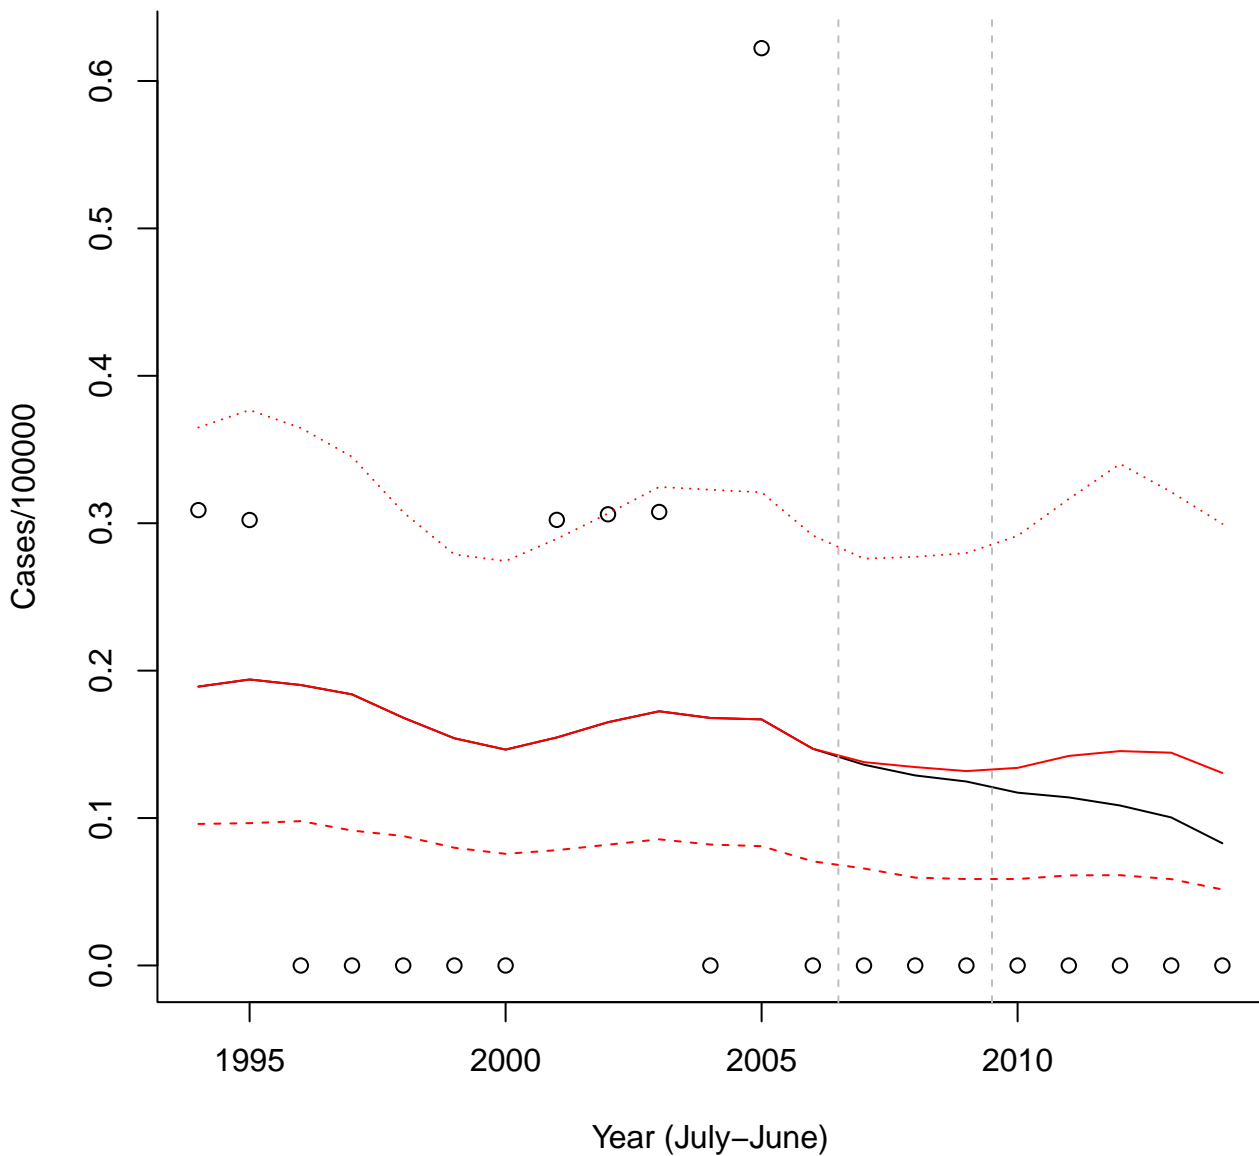

# <5y Without comorbidity Serotype 9V

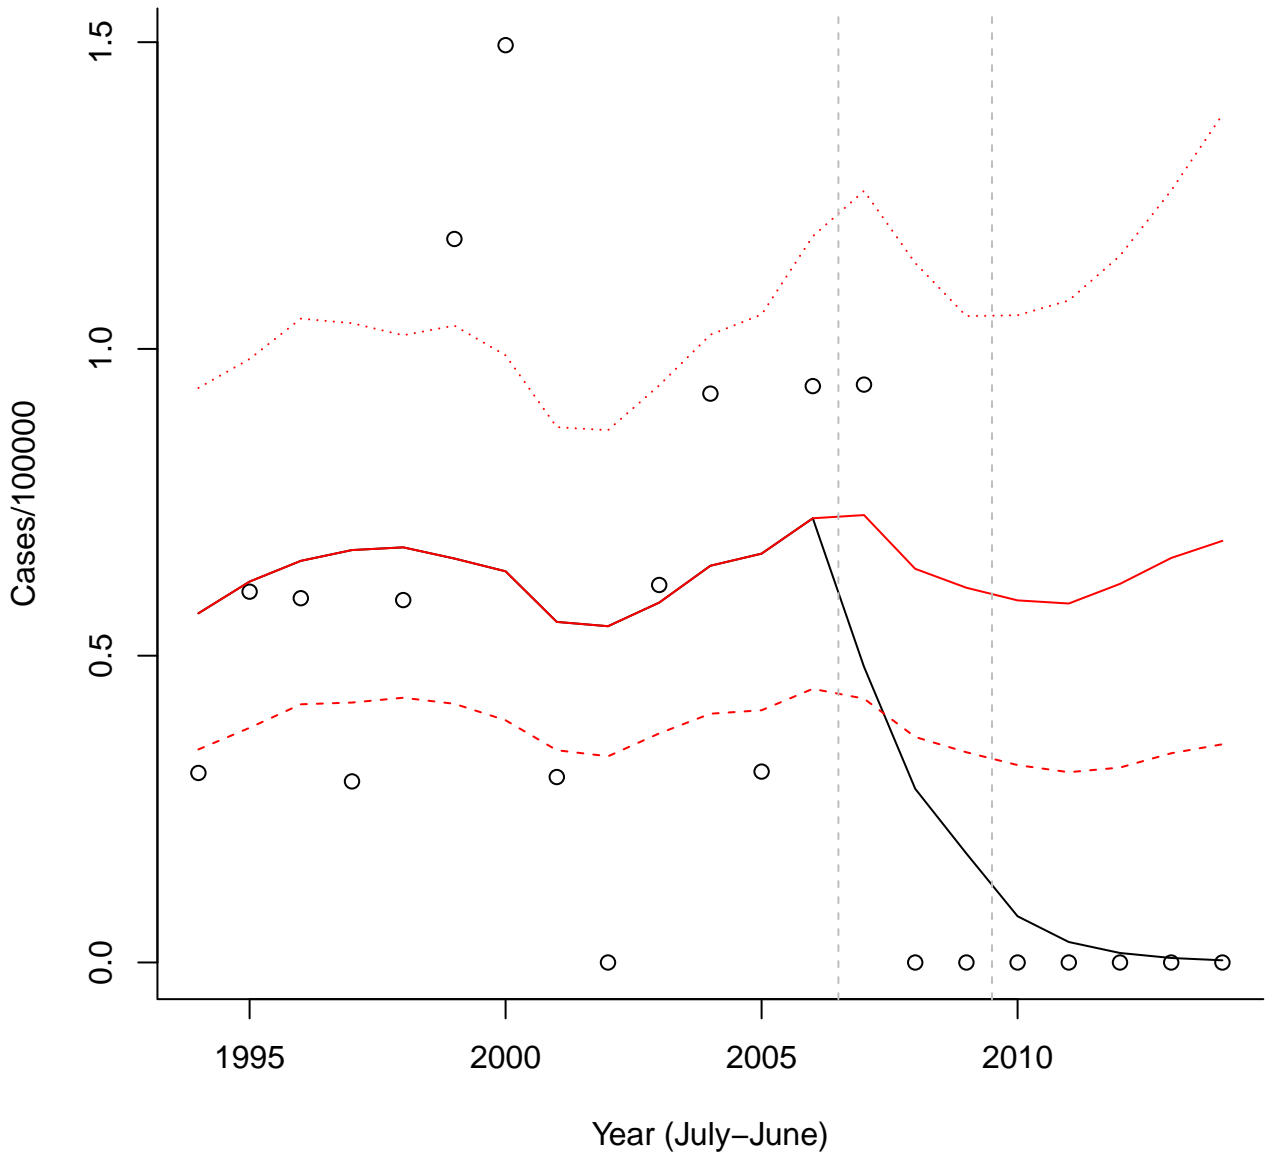

# <5y Without comorbidity Serotype OT0

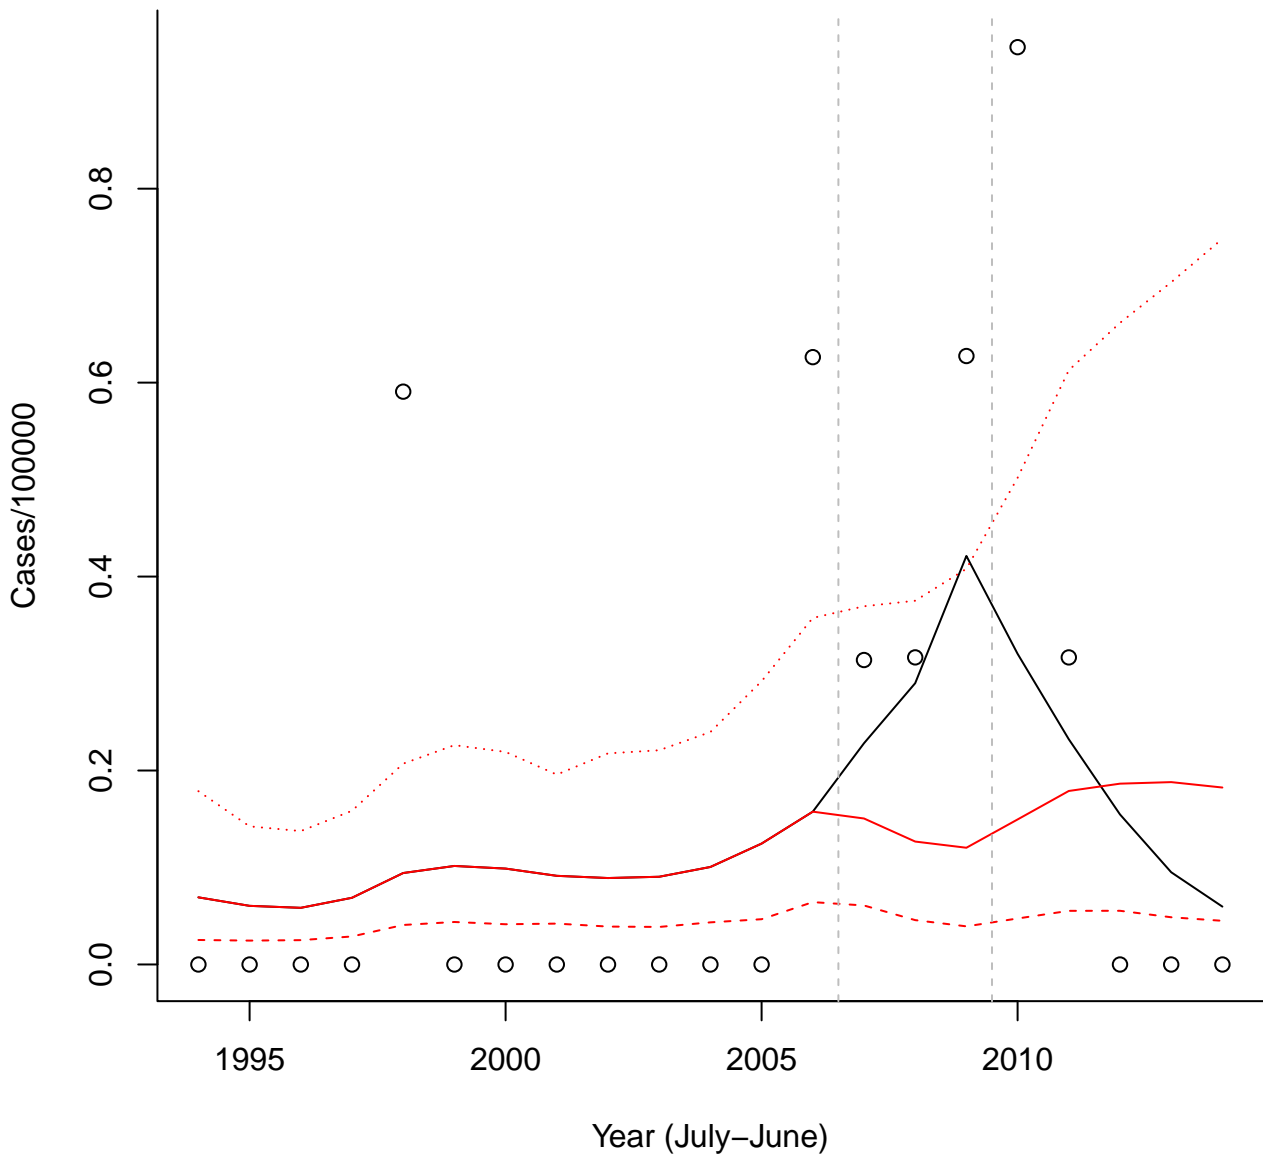

# 5-17y Without comorbidity Serotype 1

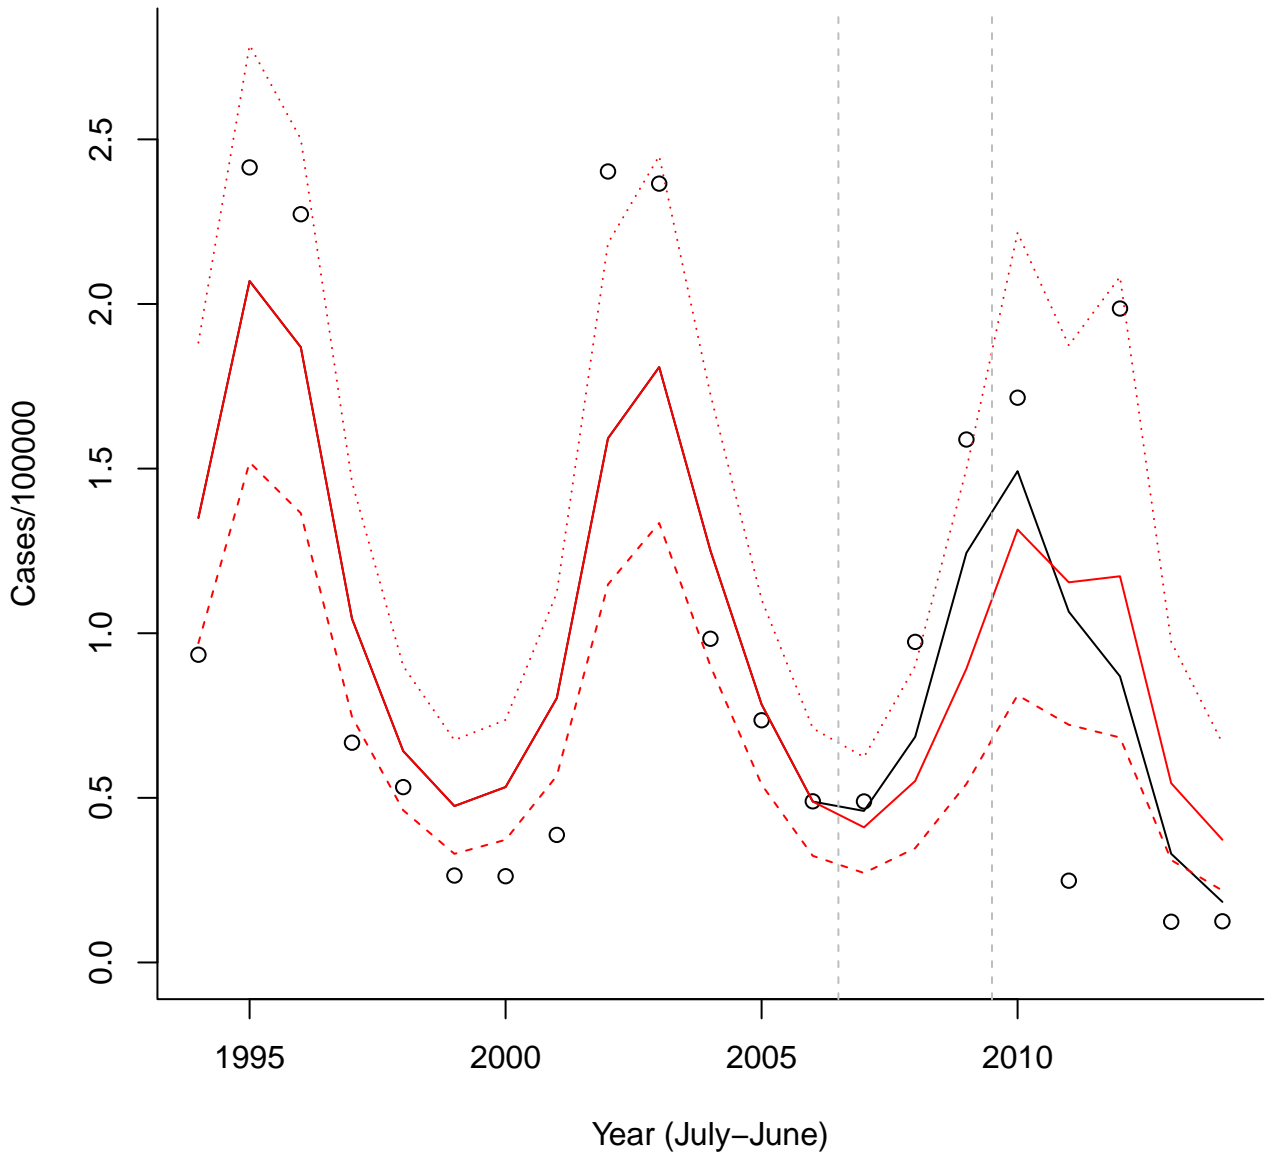

# 5-17y Without comorbidity Serotype 10A

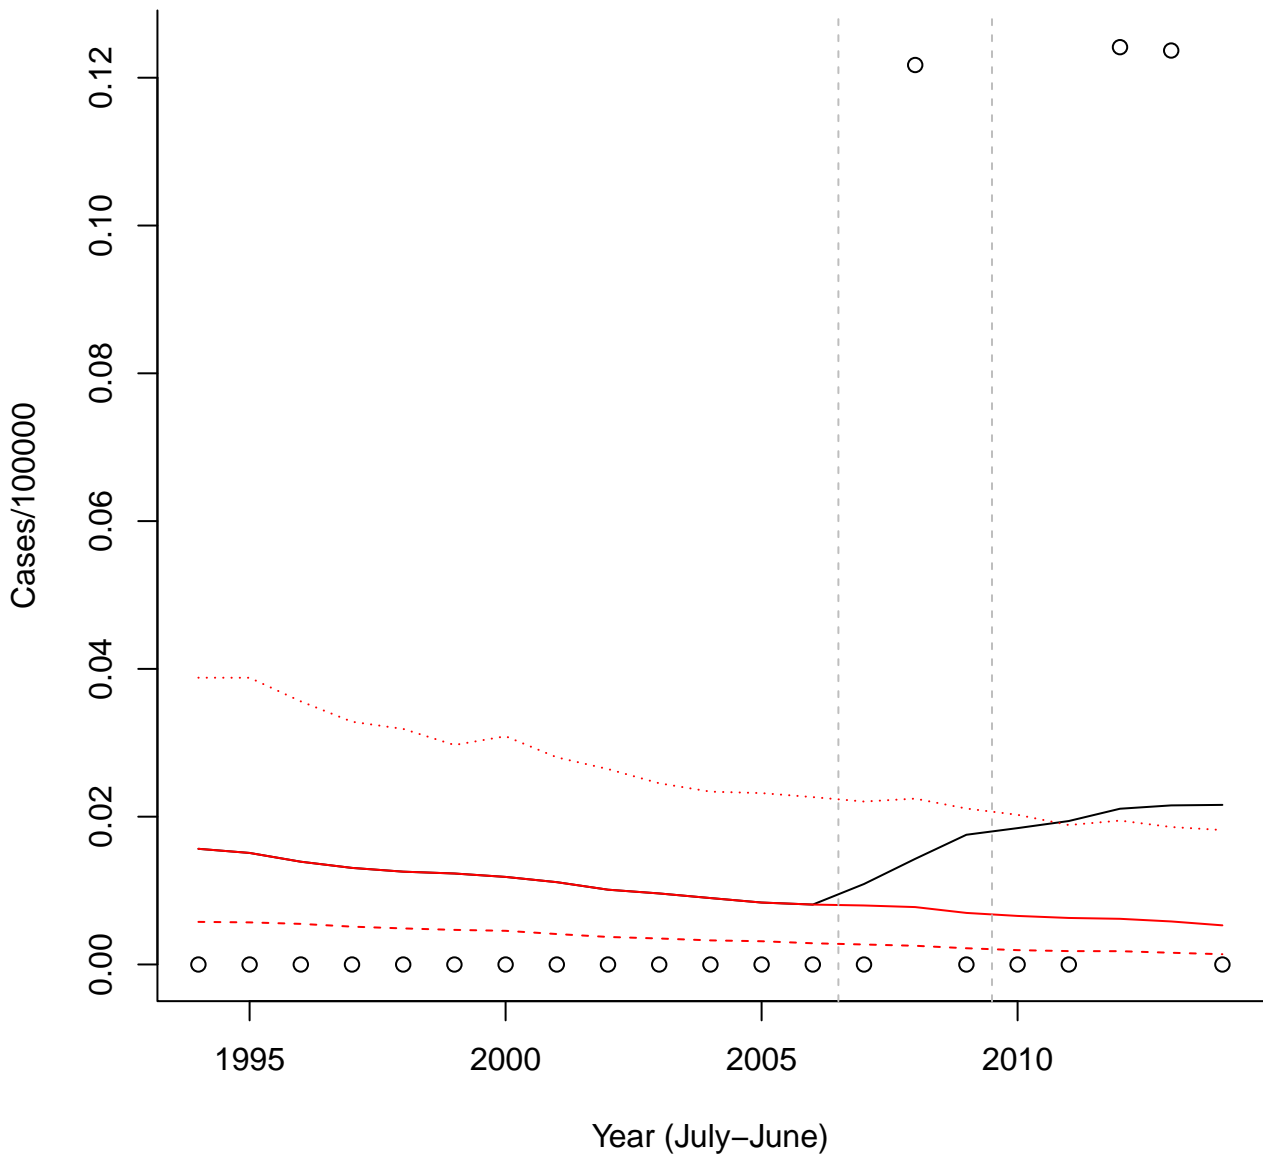

# 5-17y Without comorbidity Serotype 11A

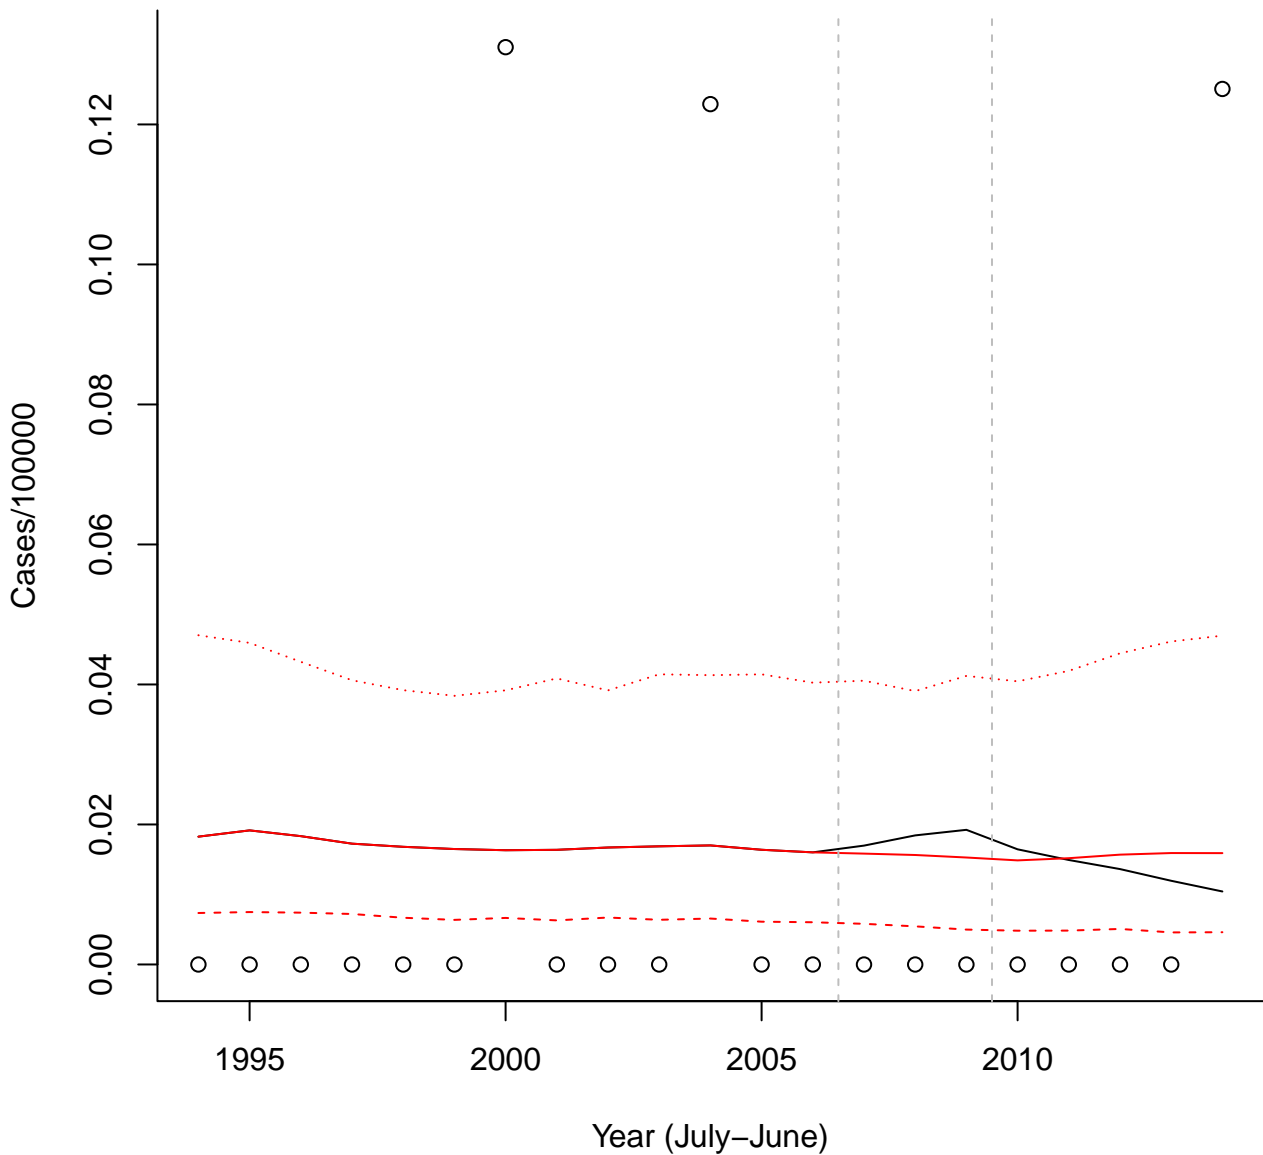

# 5-17y Without comorbidity Serotype 12F

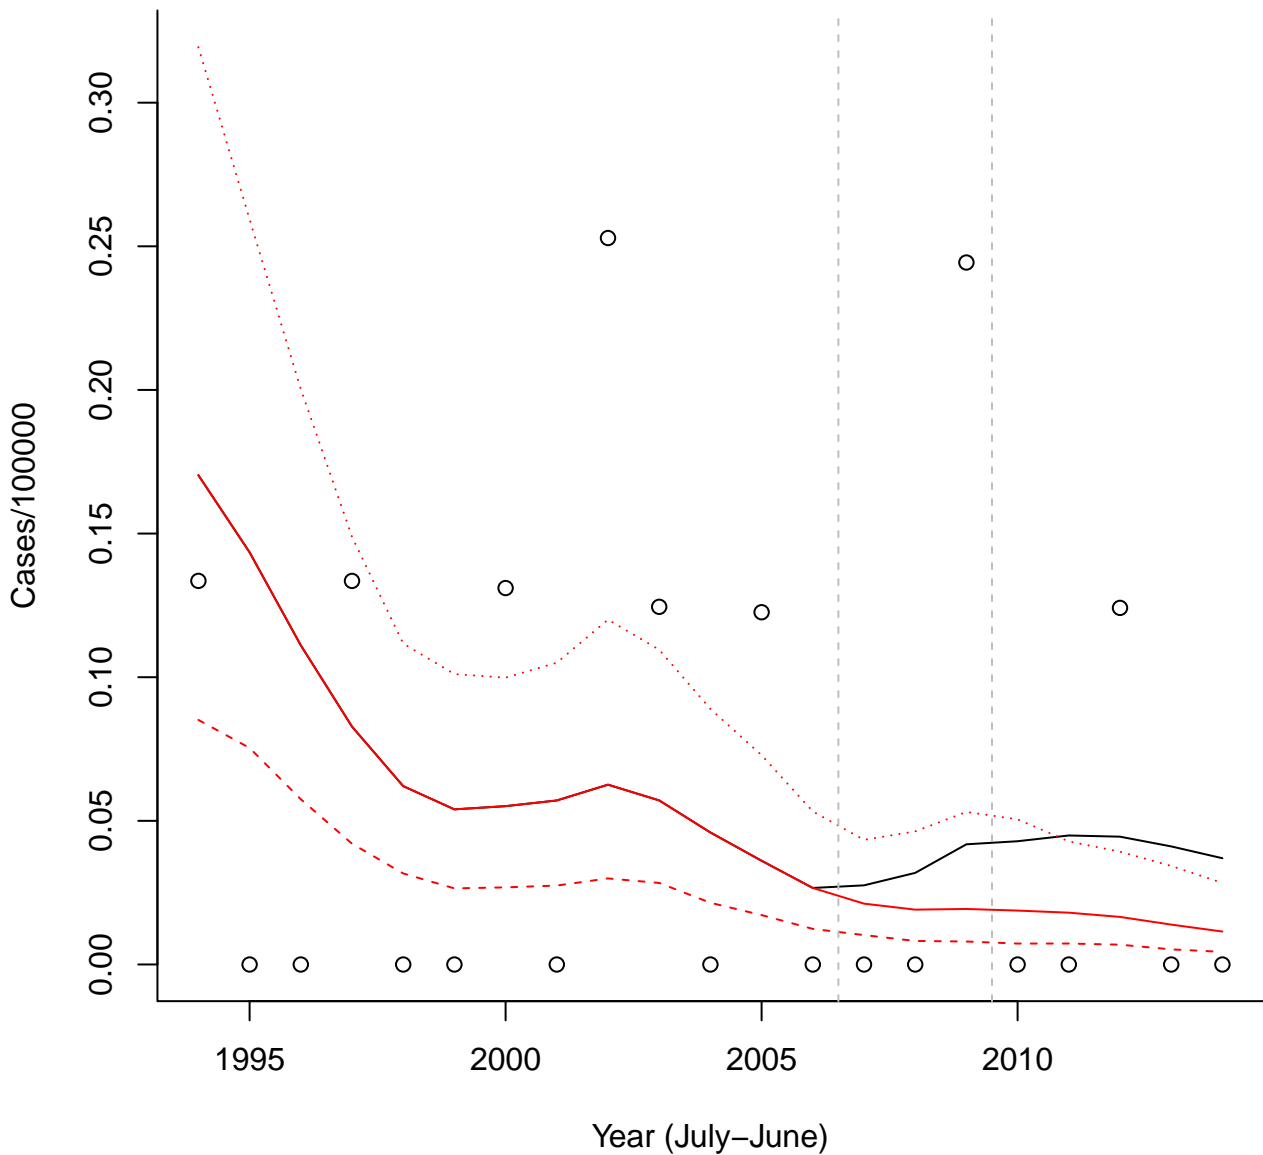



# 5-17y Without comorbidity Serotype 14

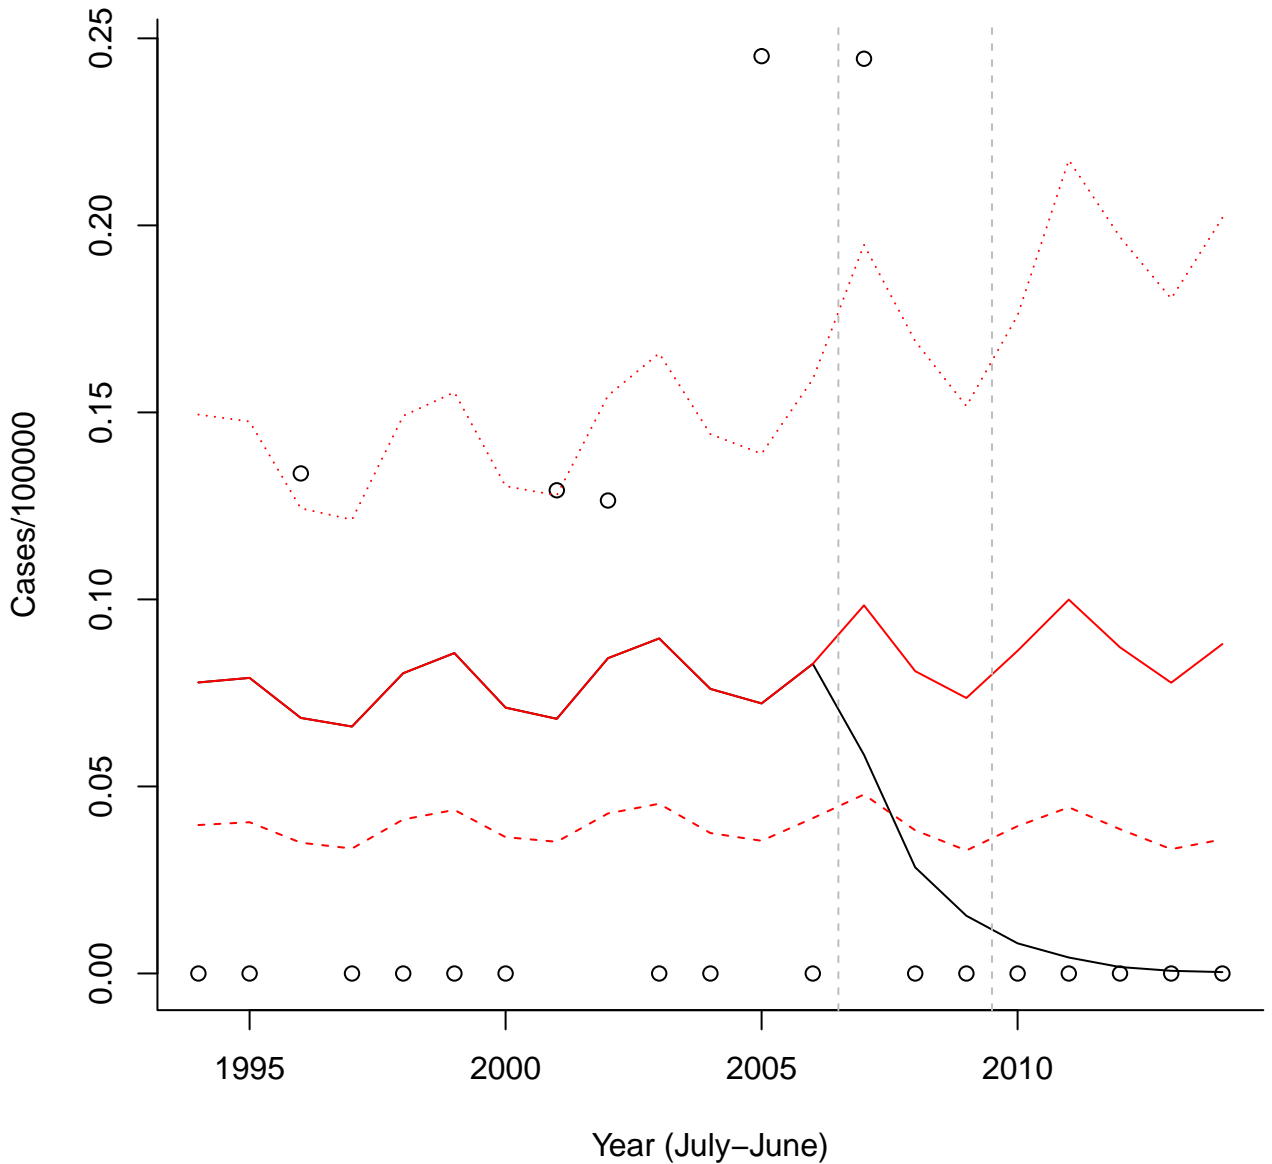

# 5-17y Without comorbidity Serotype 16F

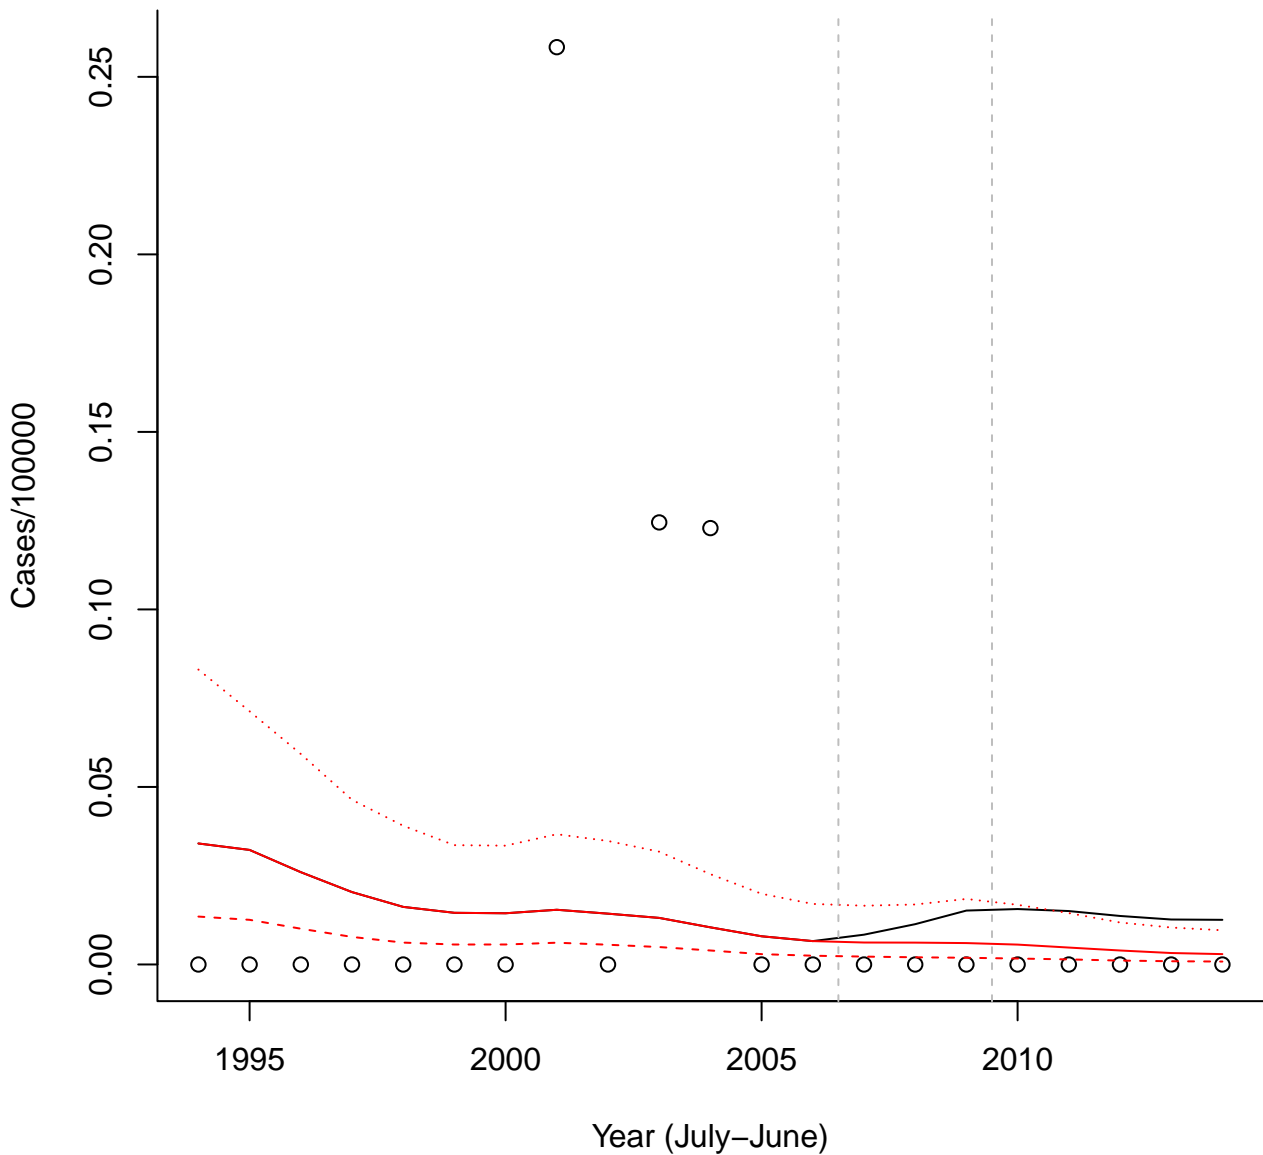

# 5-17y Without comorbidity Serotype 17F

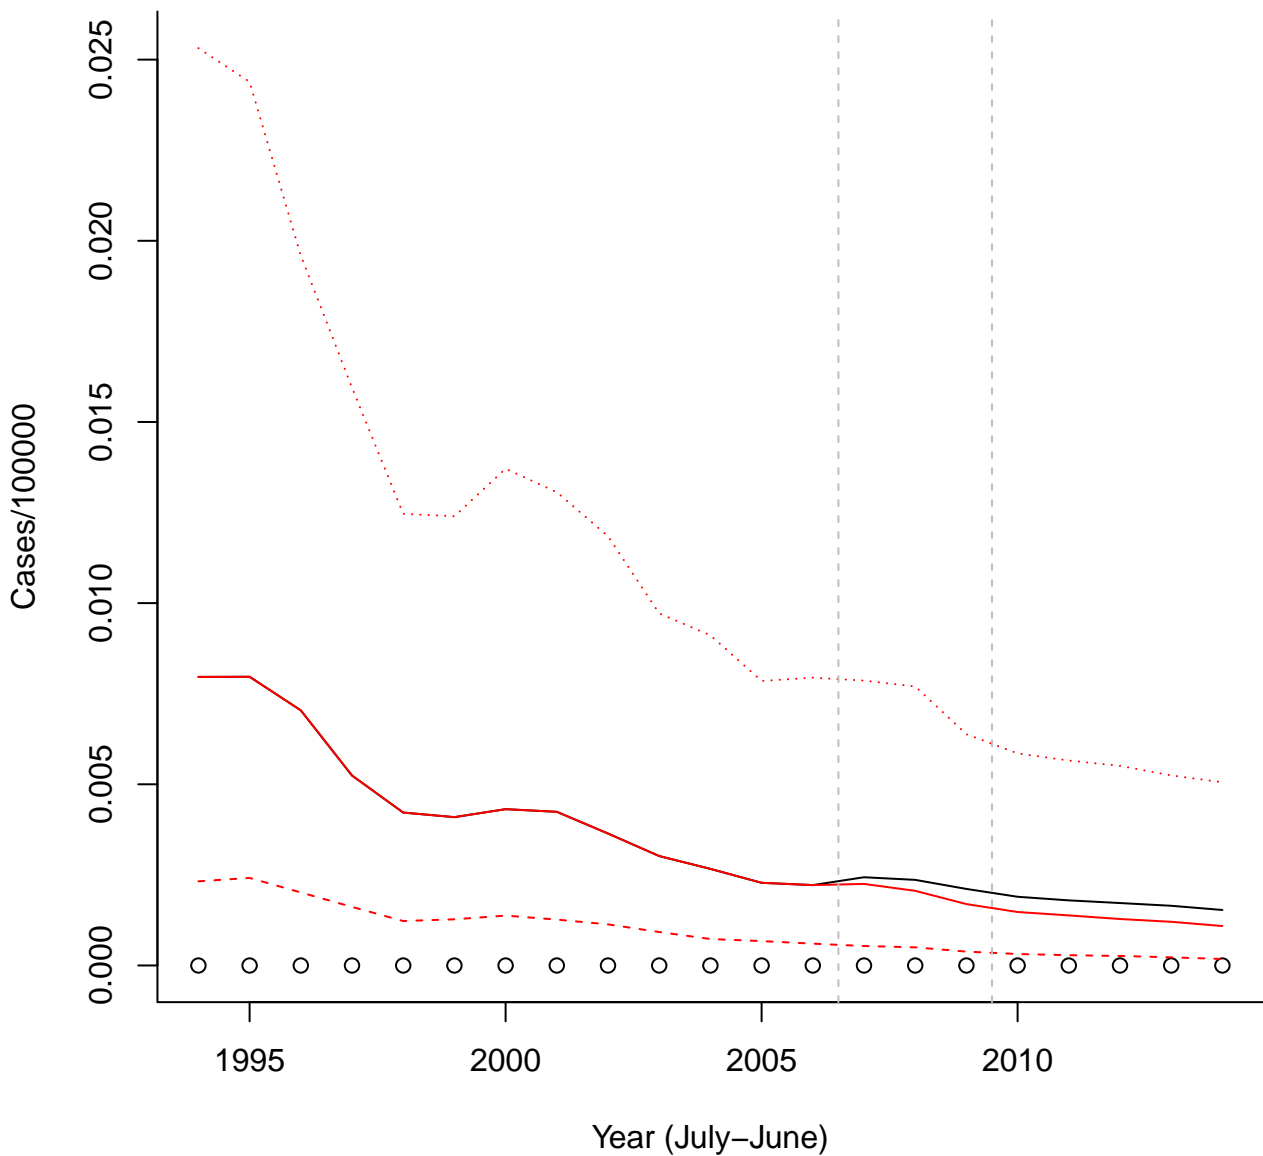

# 5-17y Without comorbidity Serotype 18C

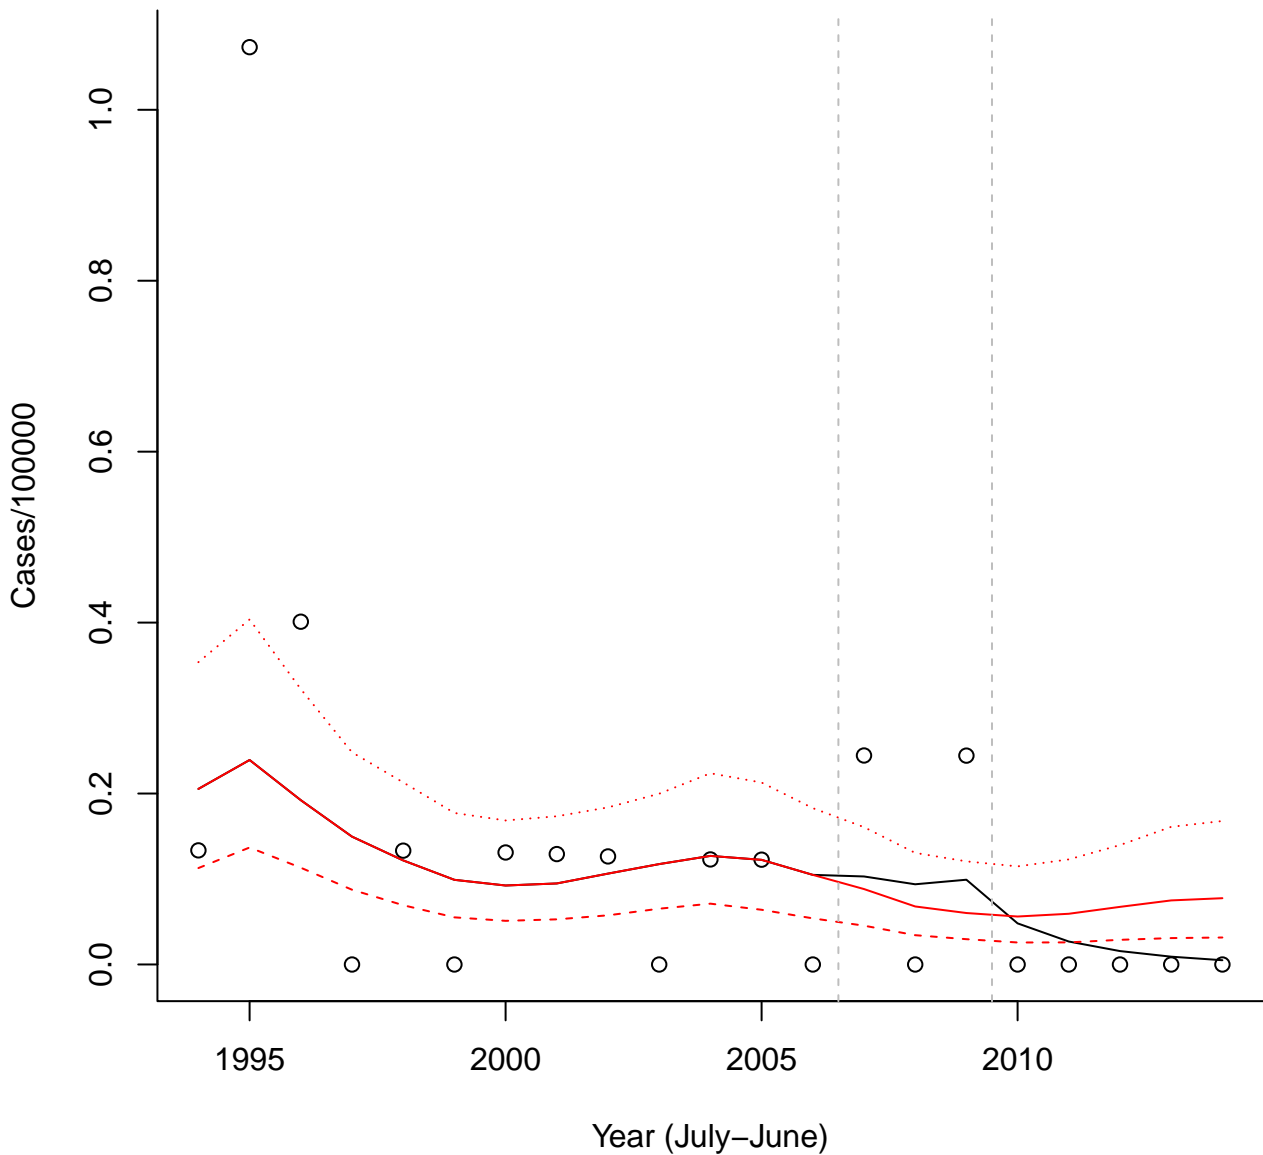

# 5-17y Without comorbidity Serotype 19A

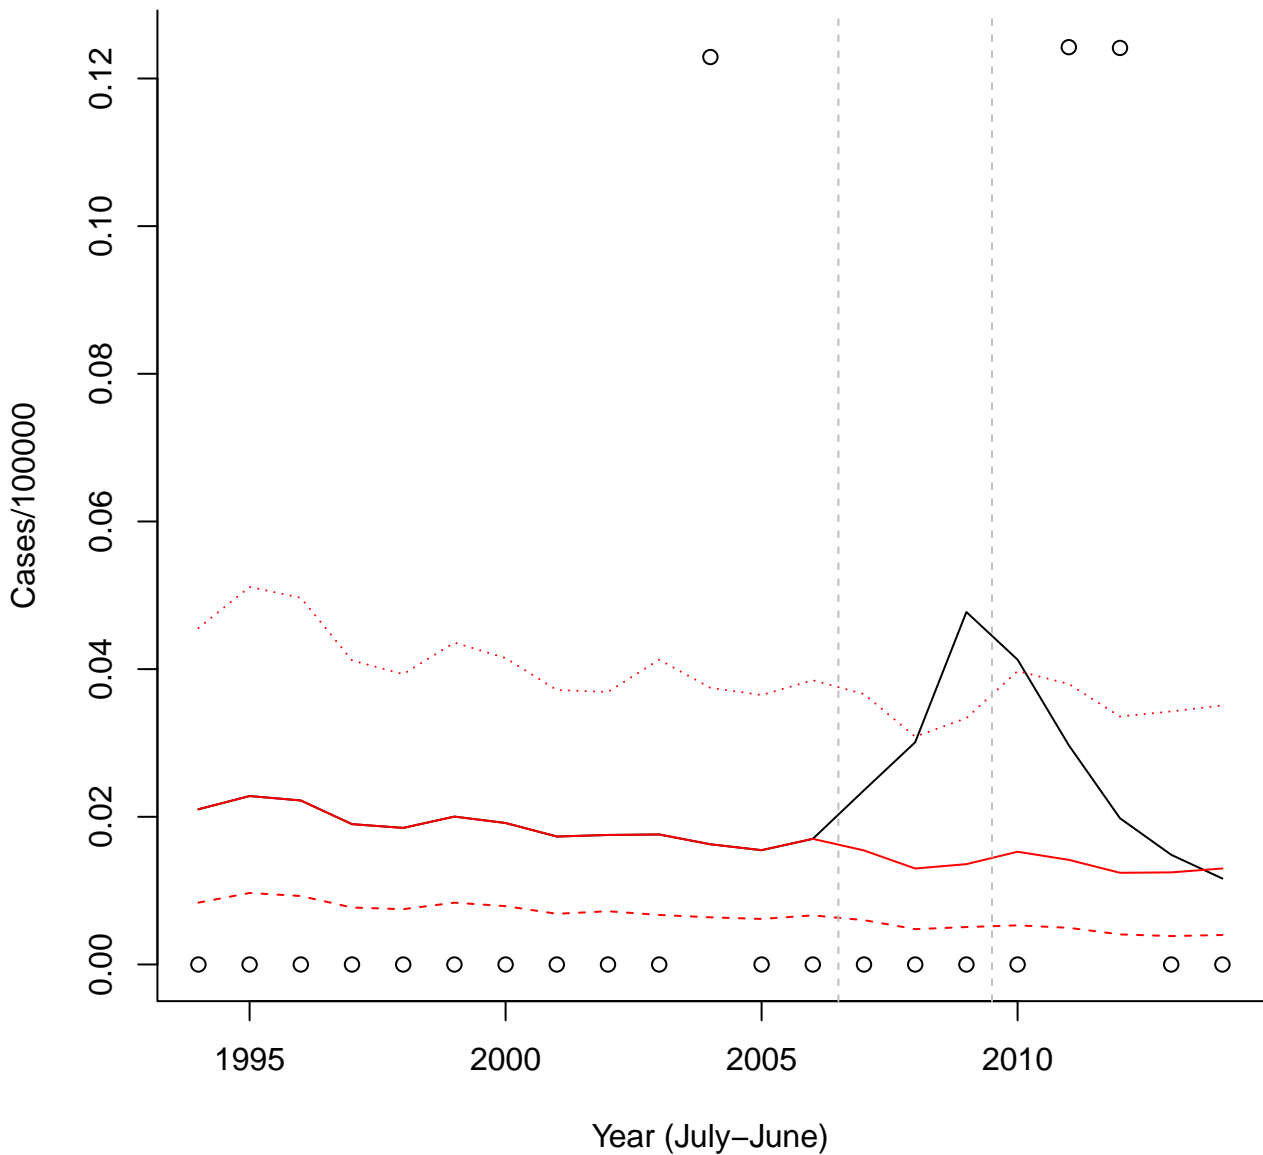

# 5-17y Without comorbidity Serotype 19F

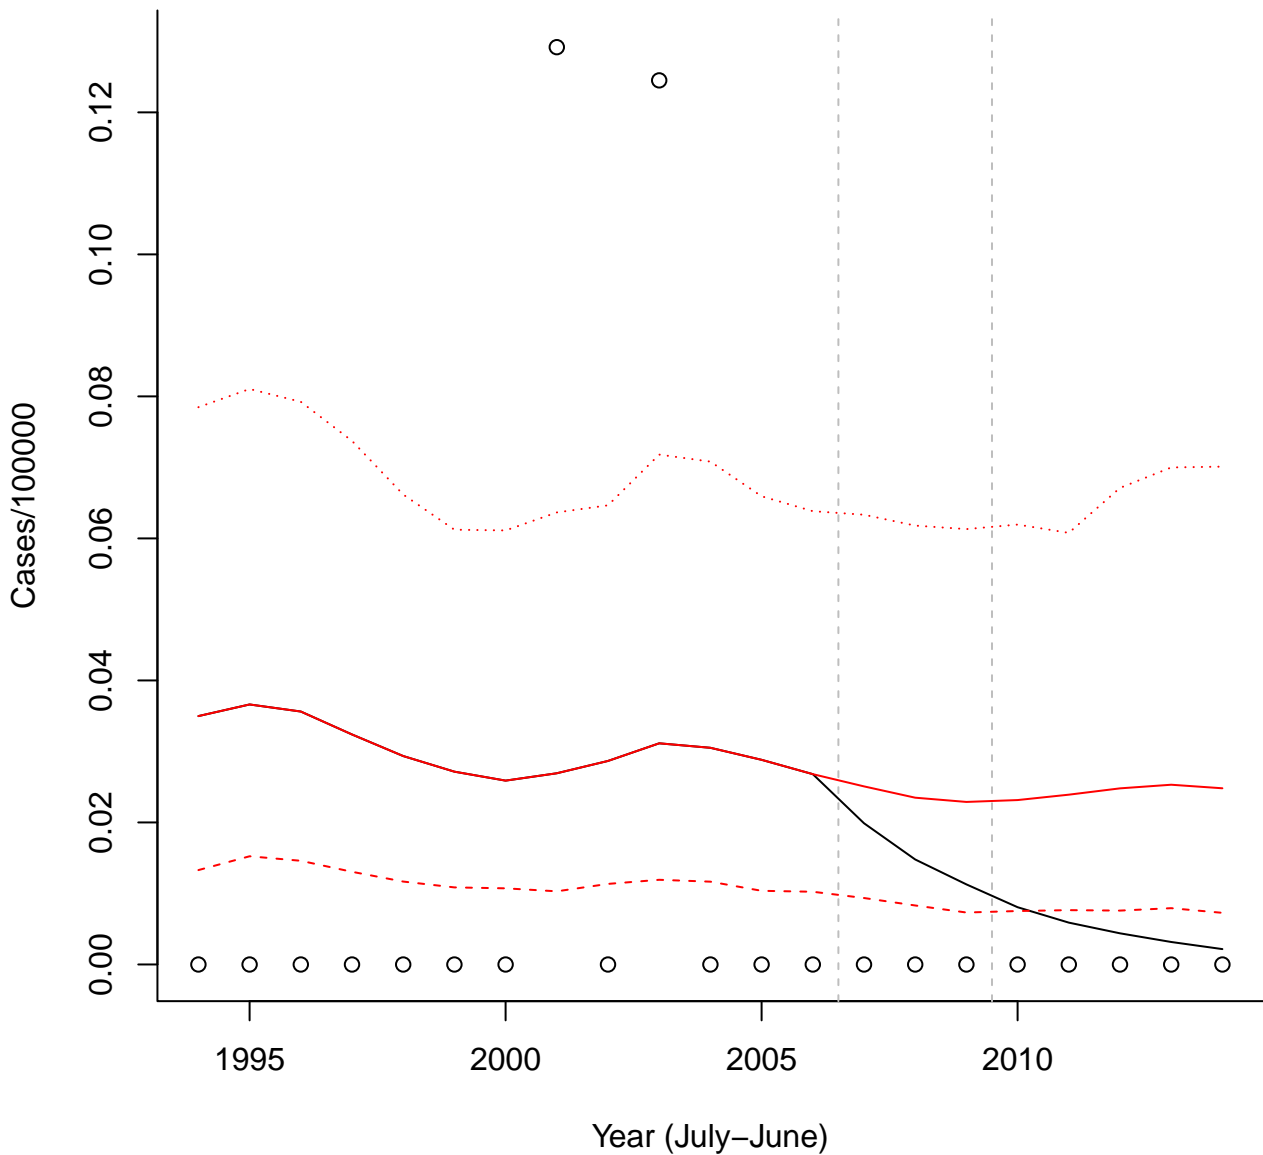

# 5-17y Without comorbidity Serotype 20

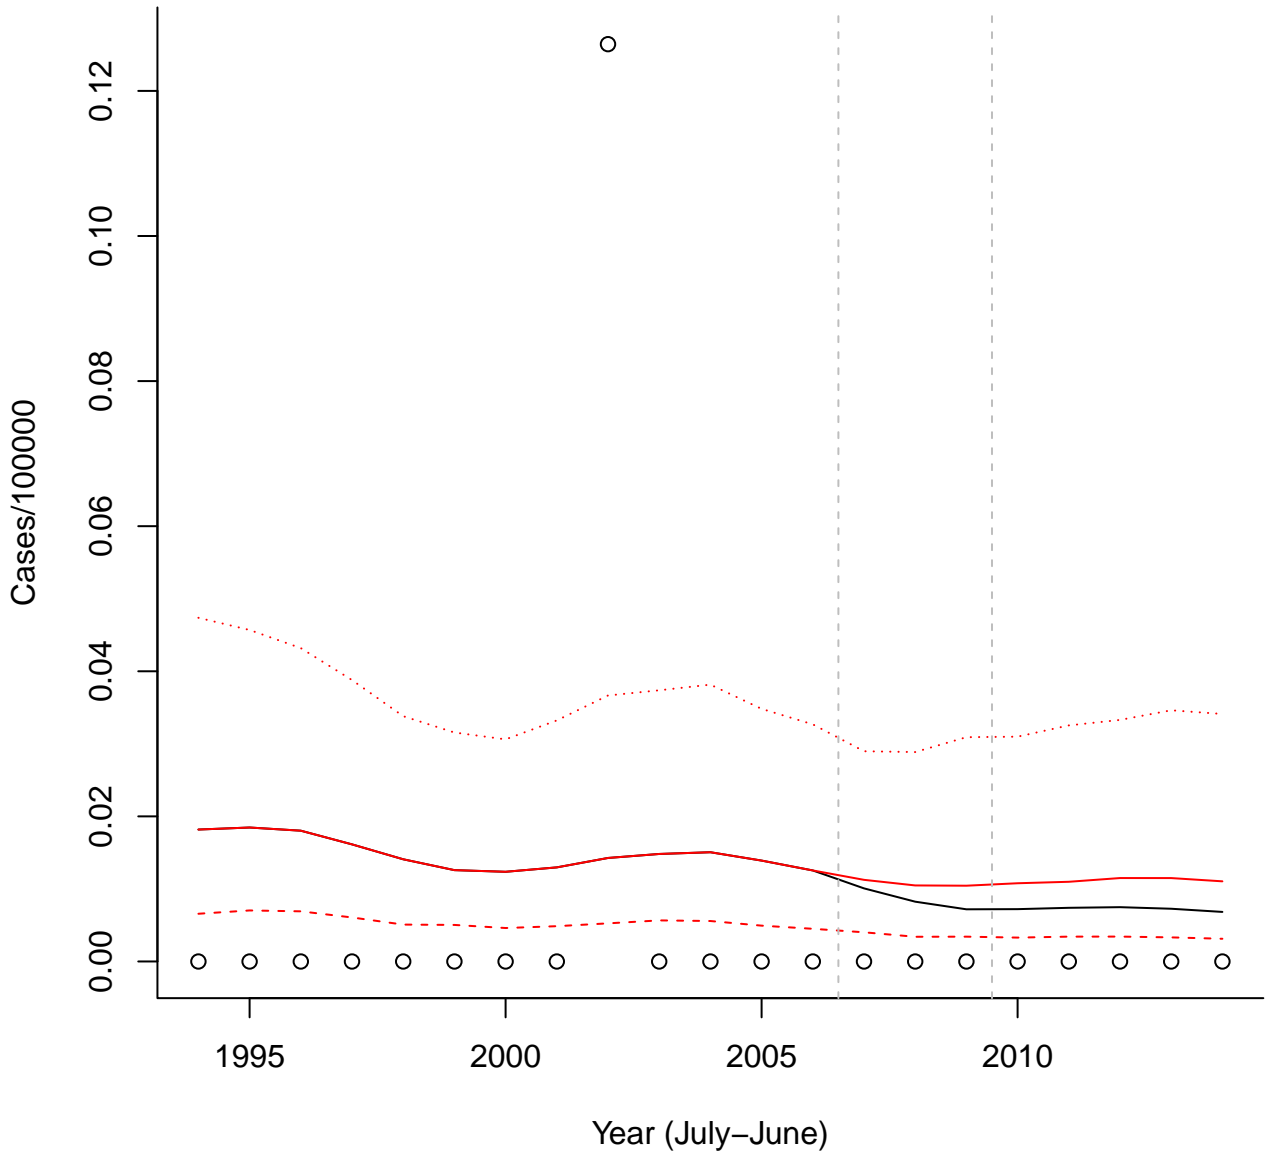

# 5-17y Without comorbidity Serotype 22F

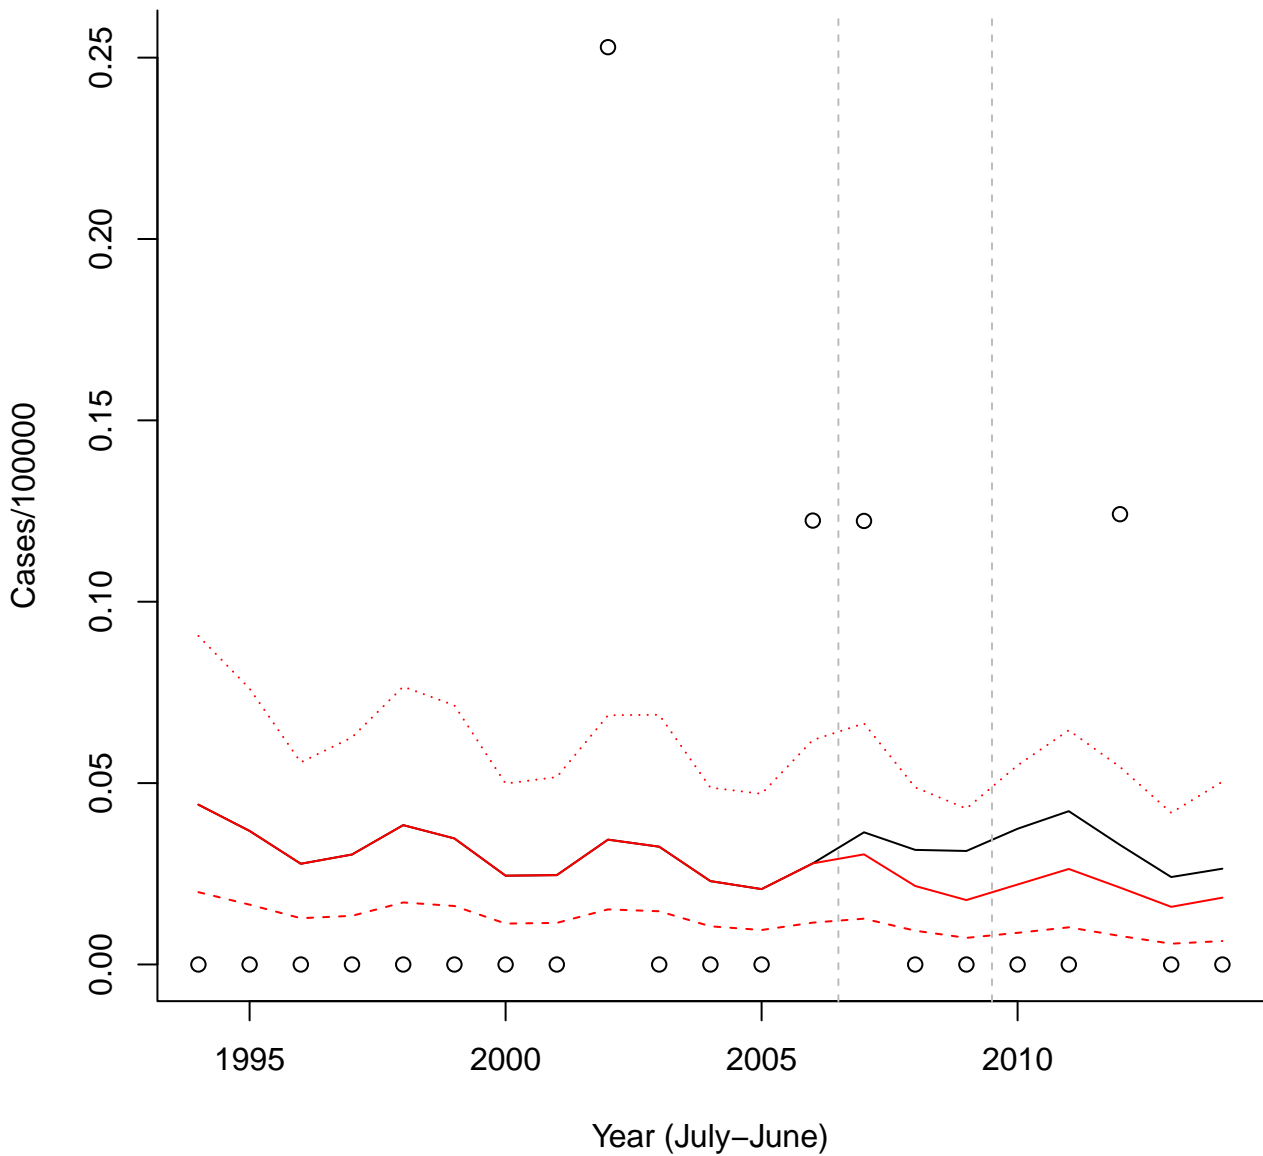



# 5-17y Without comorbidity Serotype 23A

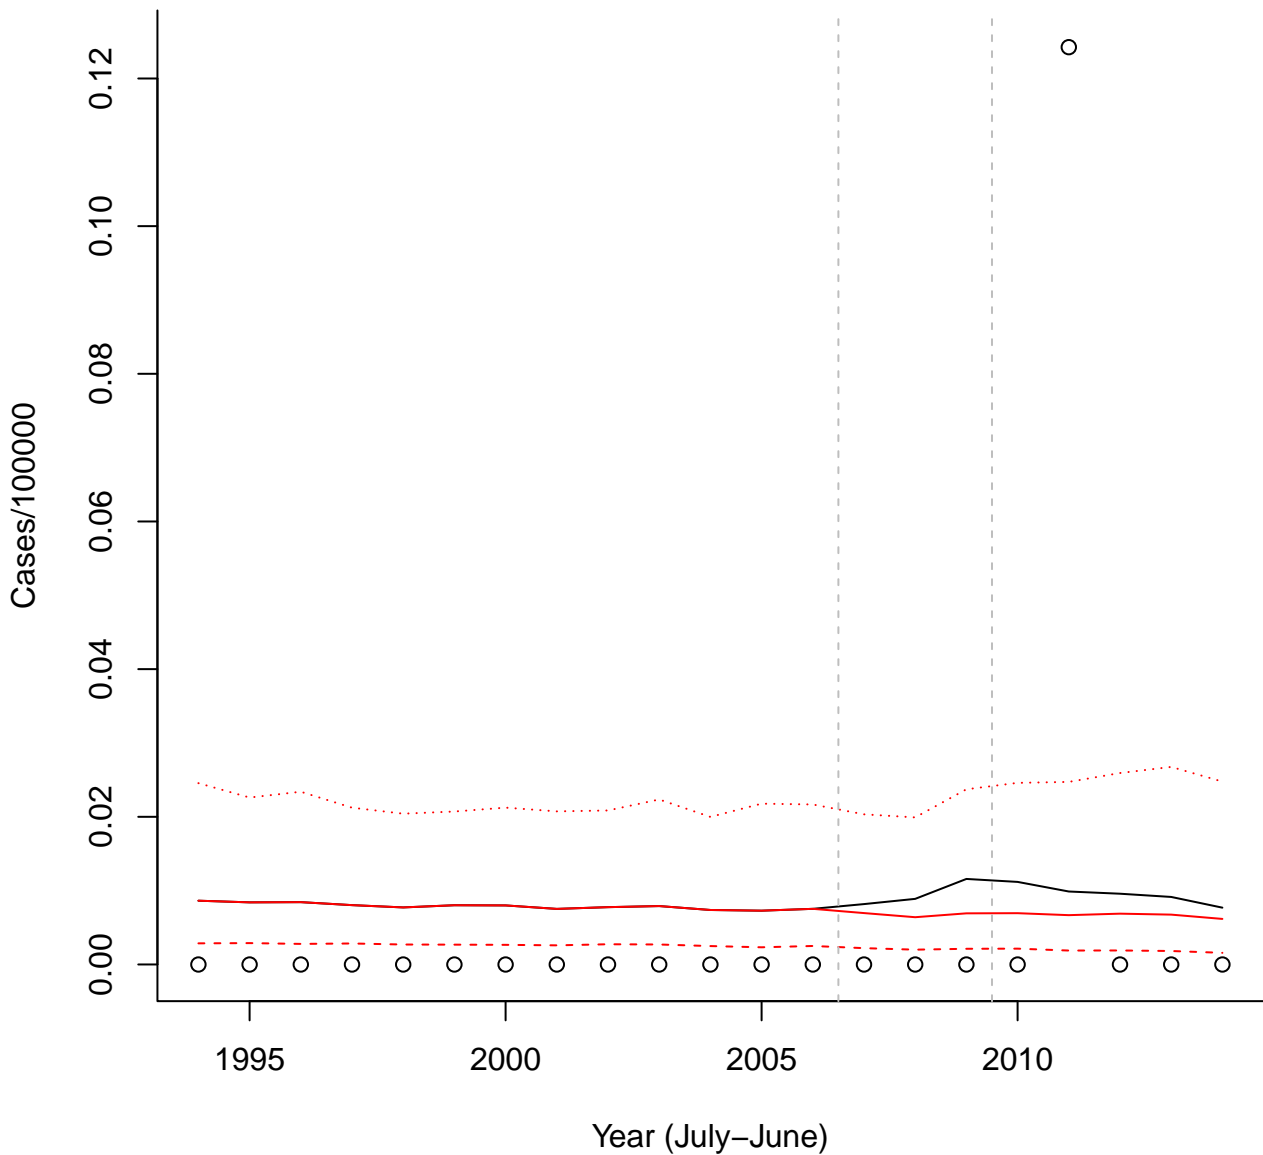

# 5-17y Without comorbidity Serotype 23B

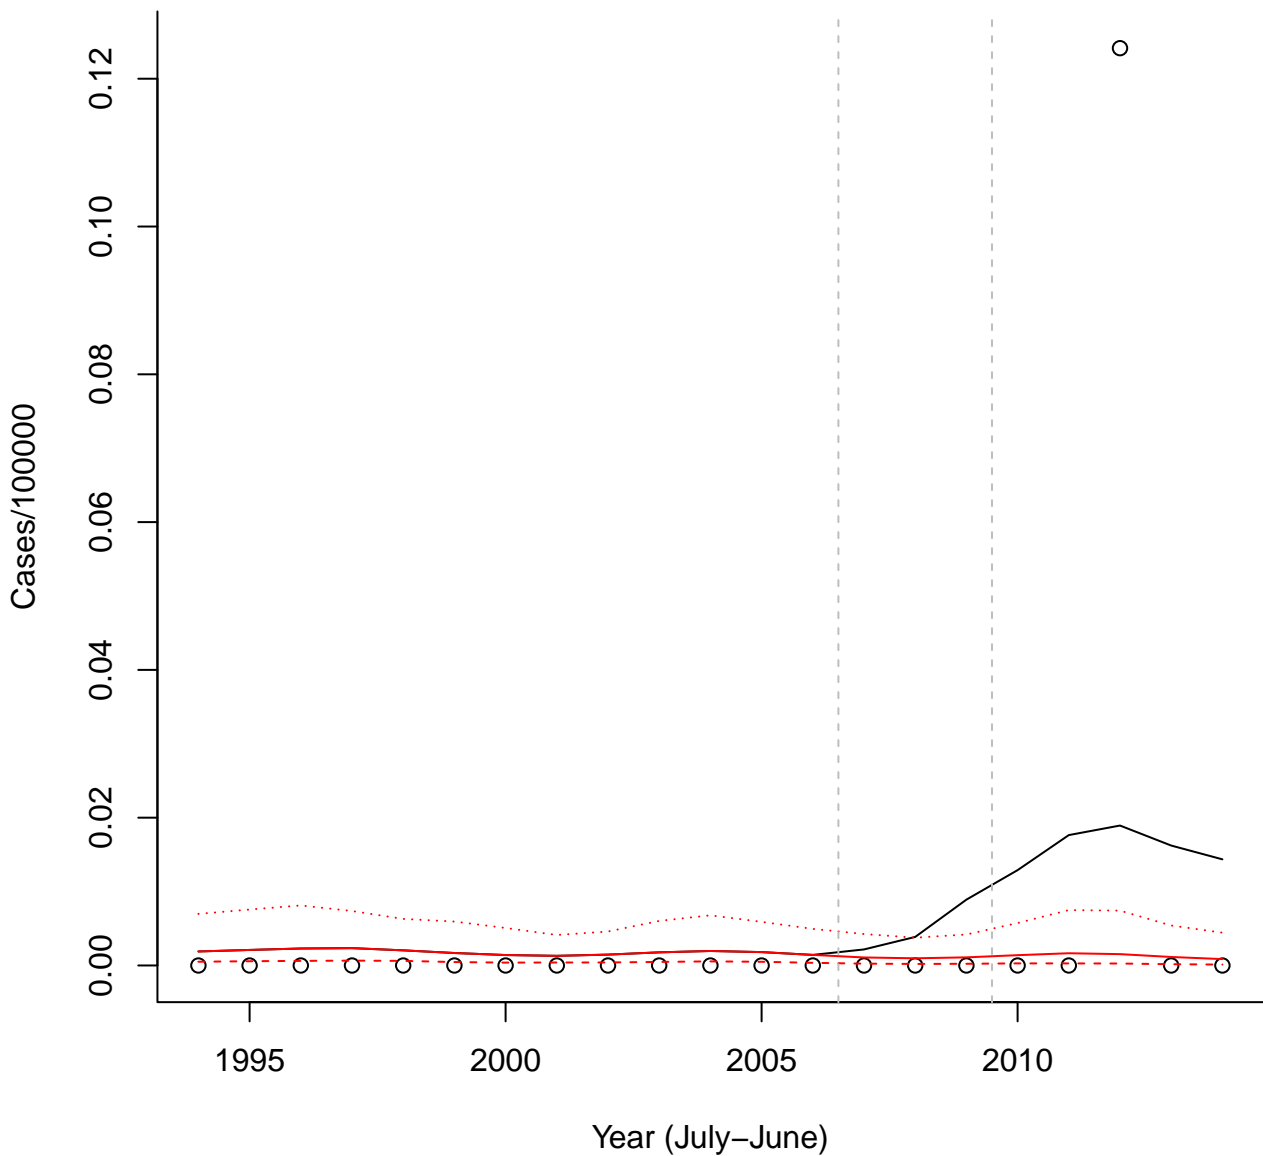

# 5-17y Without comorbidity Serotype 23F

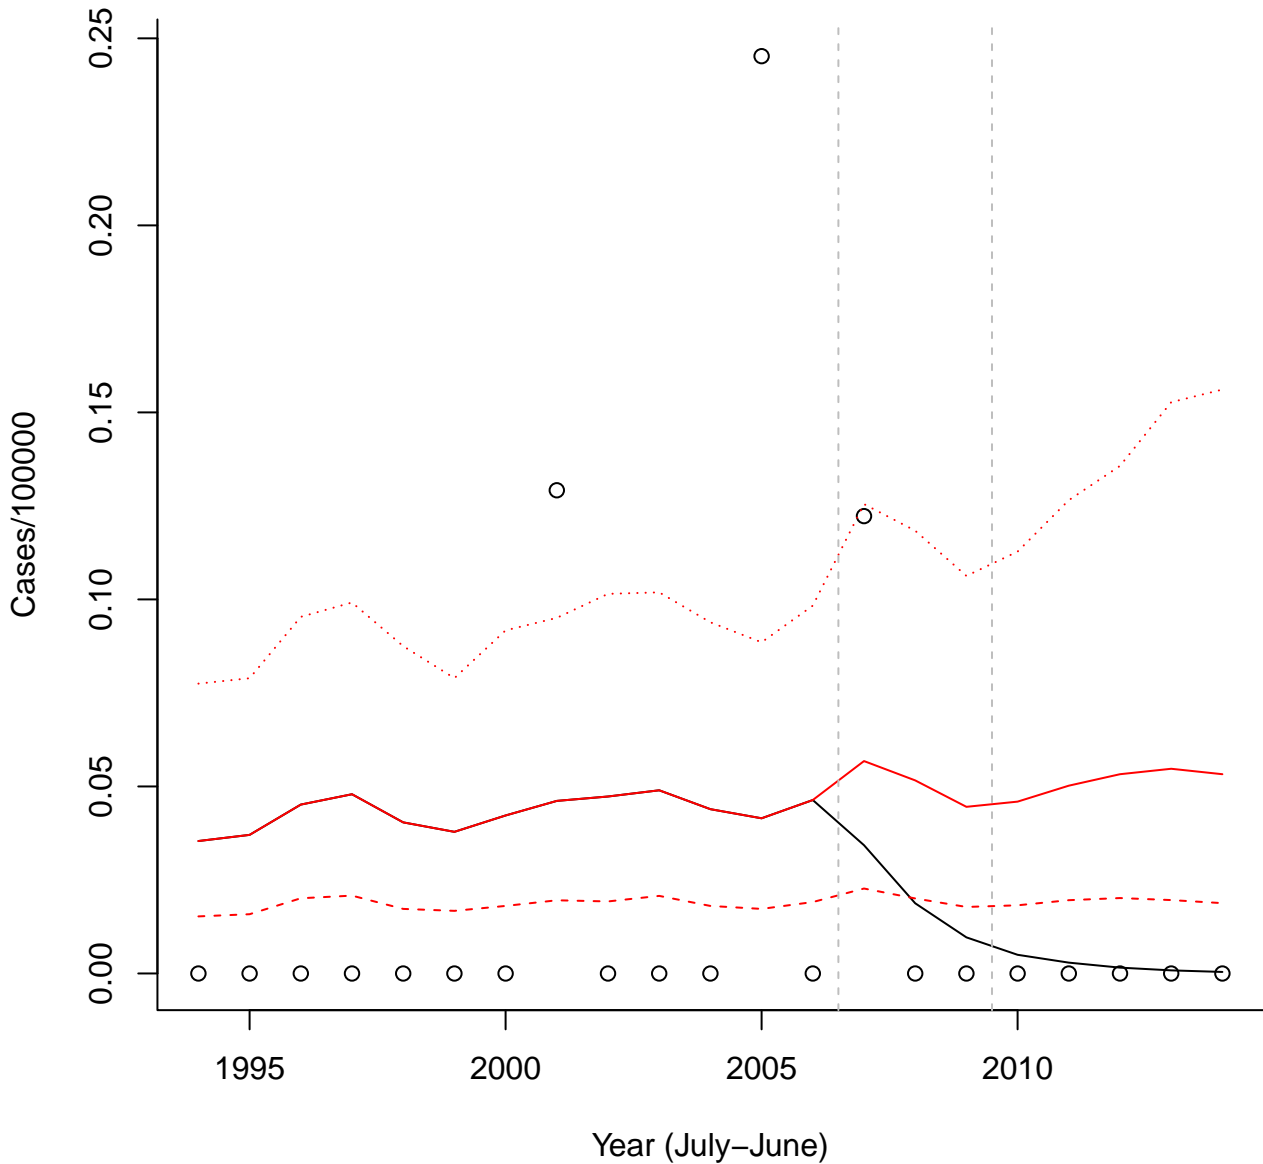

# 5-17y Without comorbidity Serotype 24F

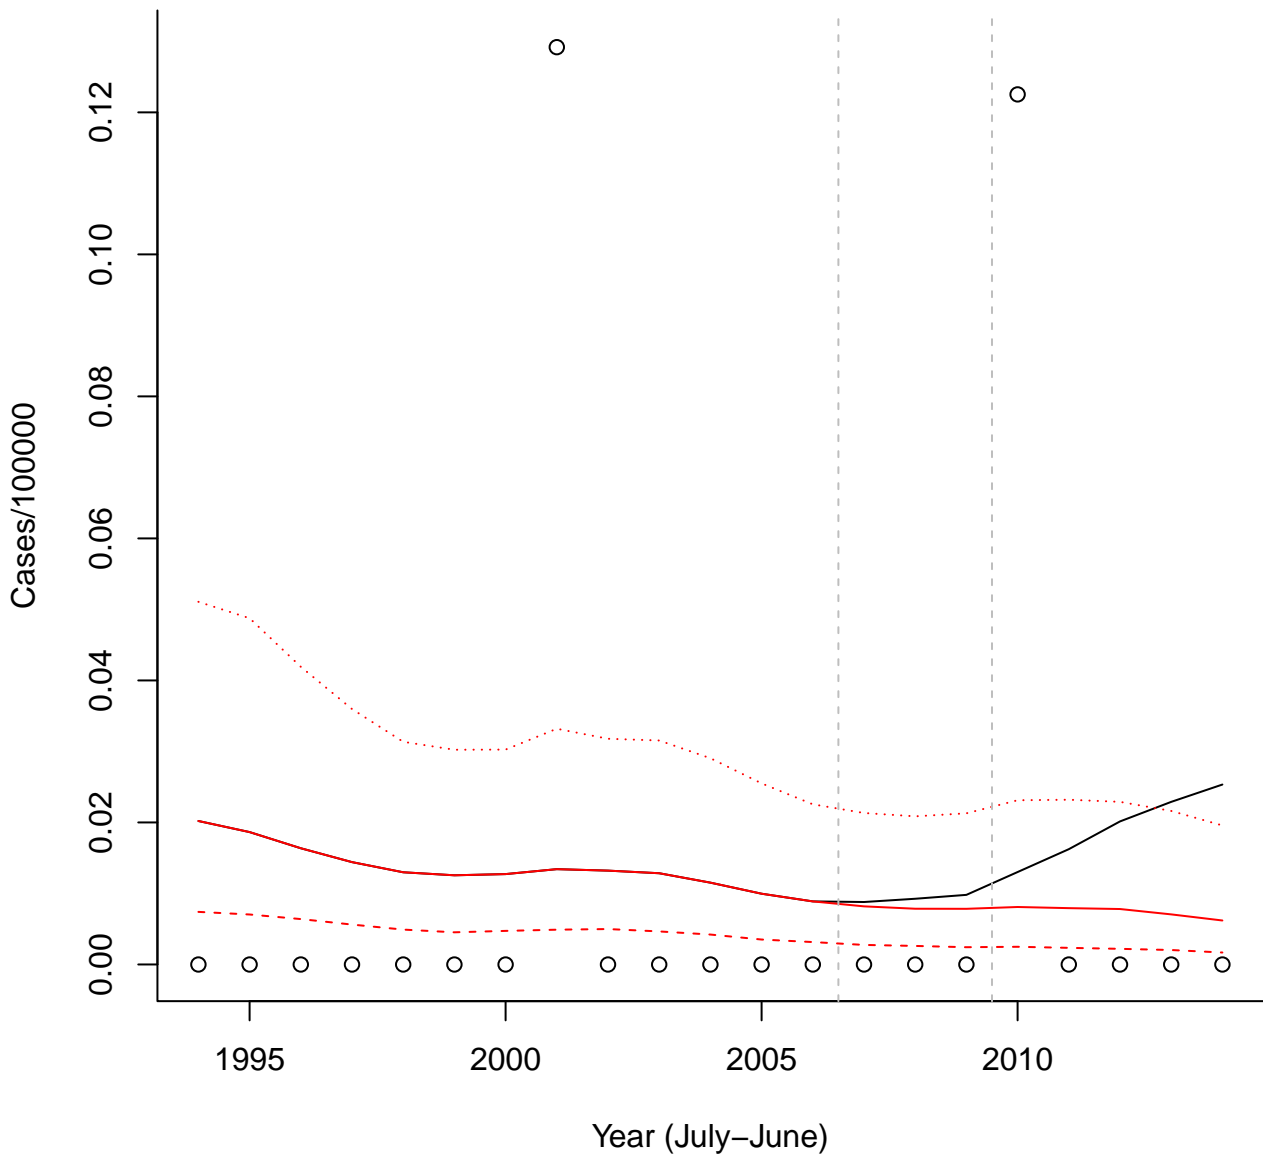

# 5-17y Without comorbidity Serotype 27

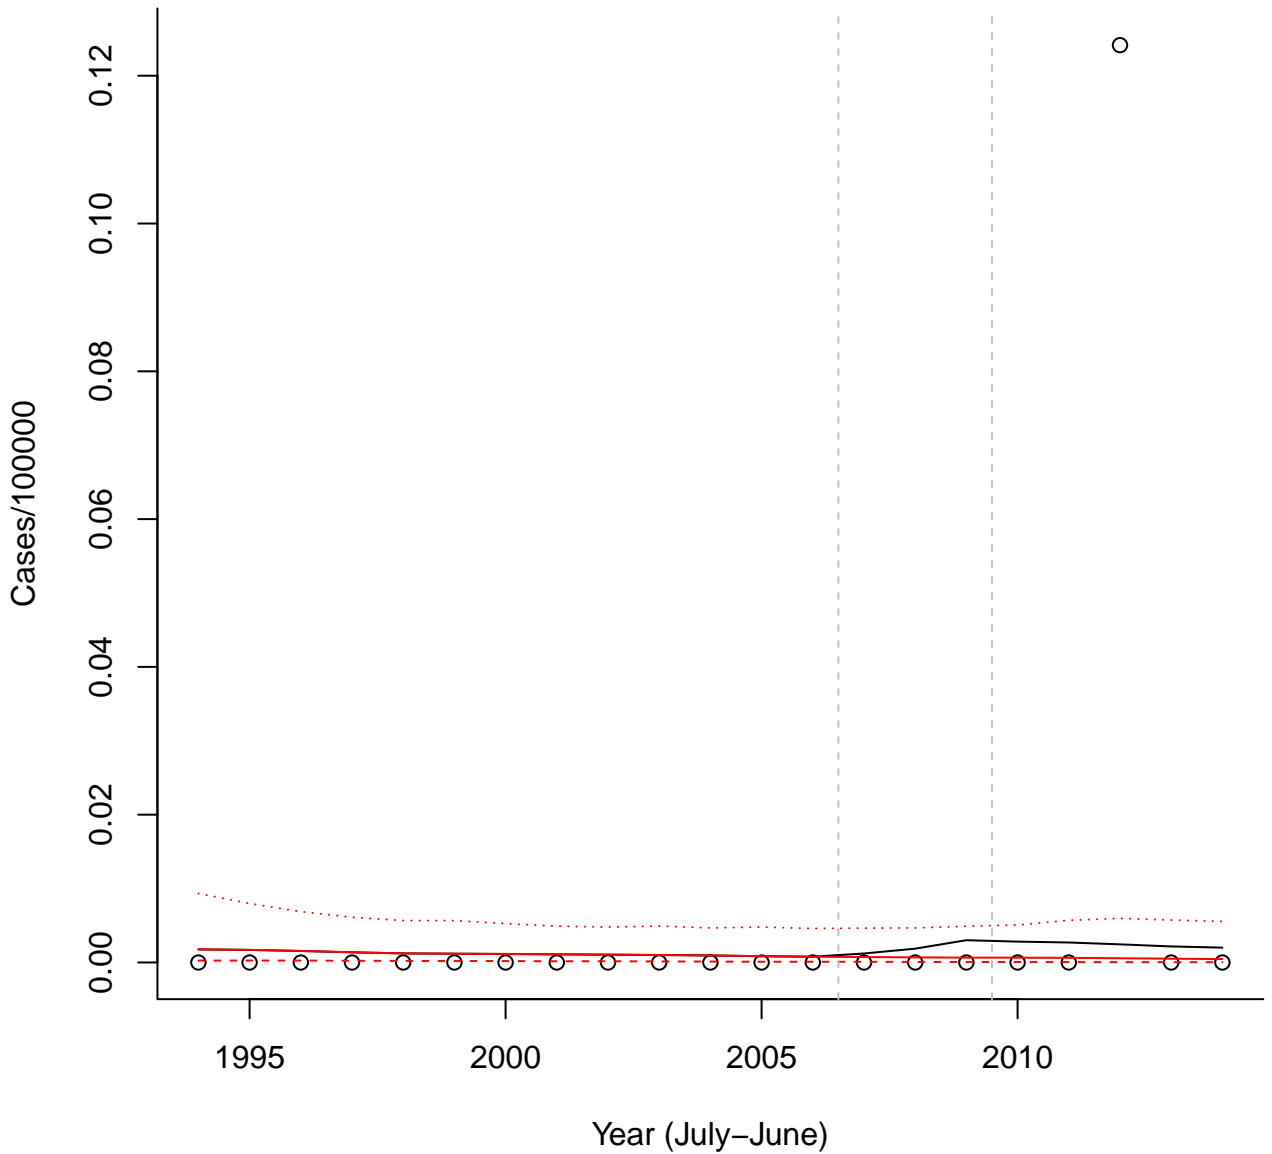

# 5-17y Without comorbidity Serotype 3

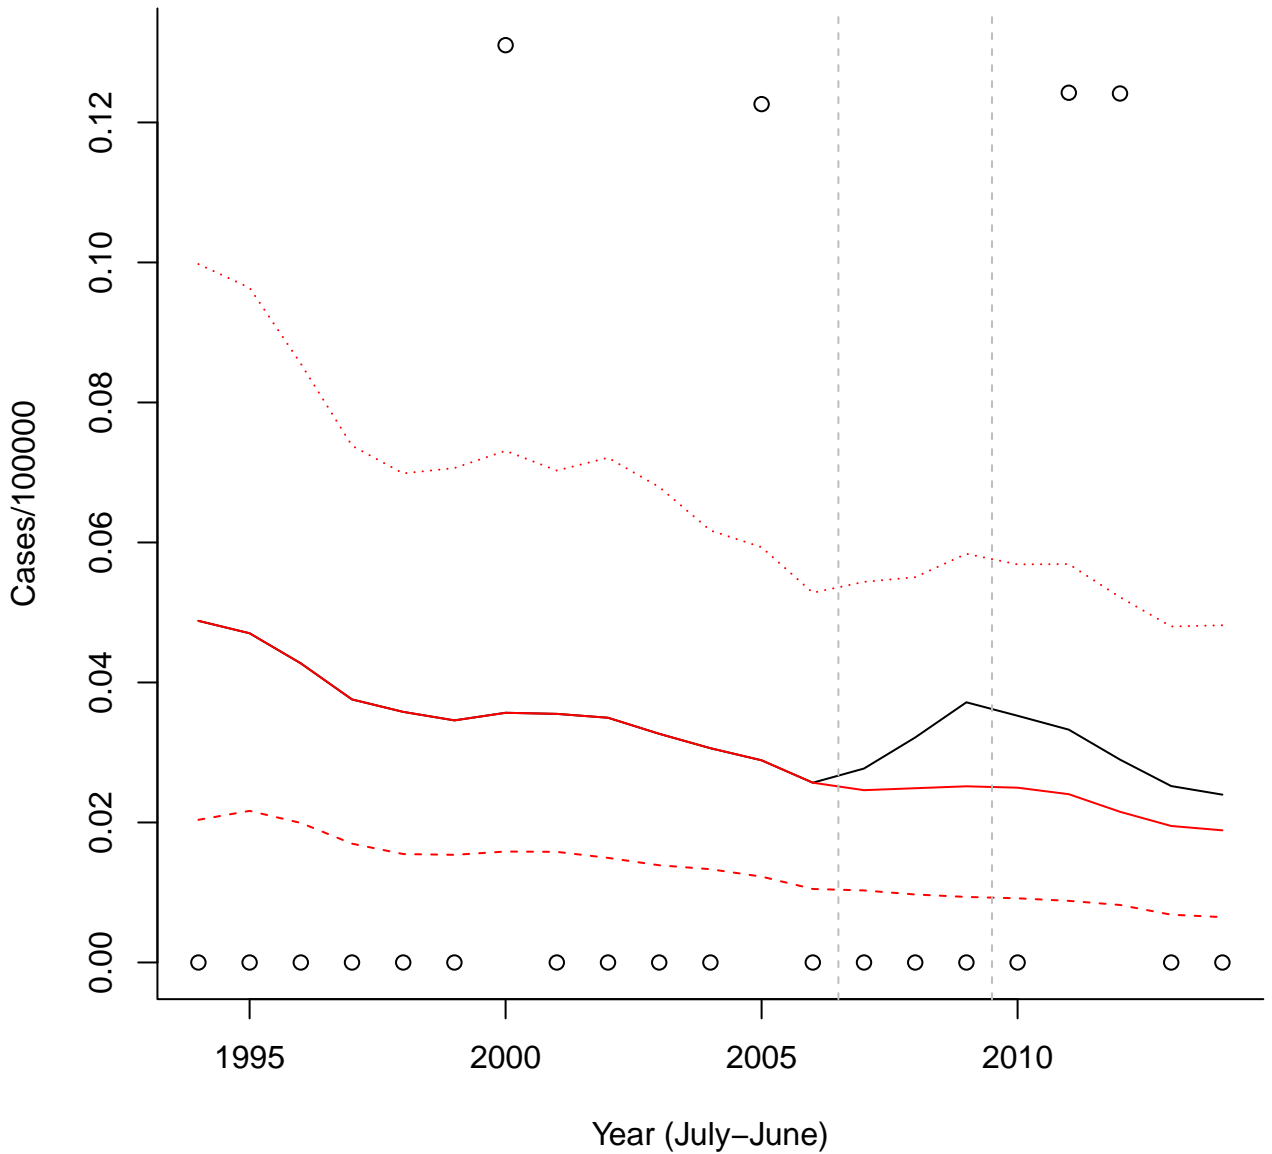

# 5-17y Without comorbidity Serotype 31

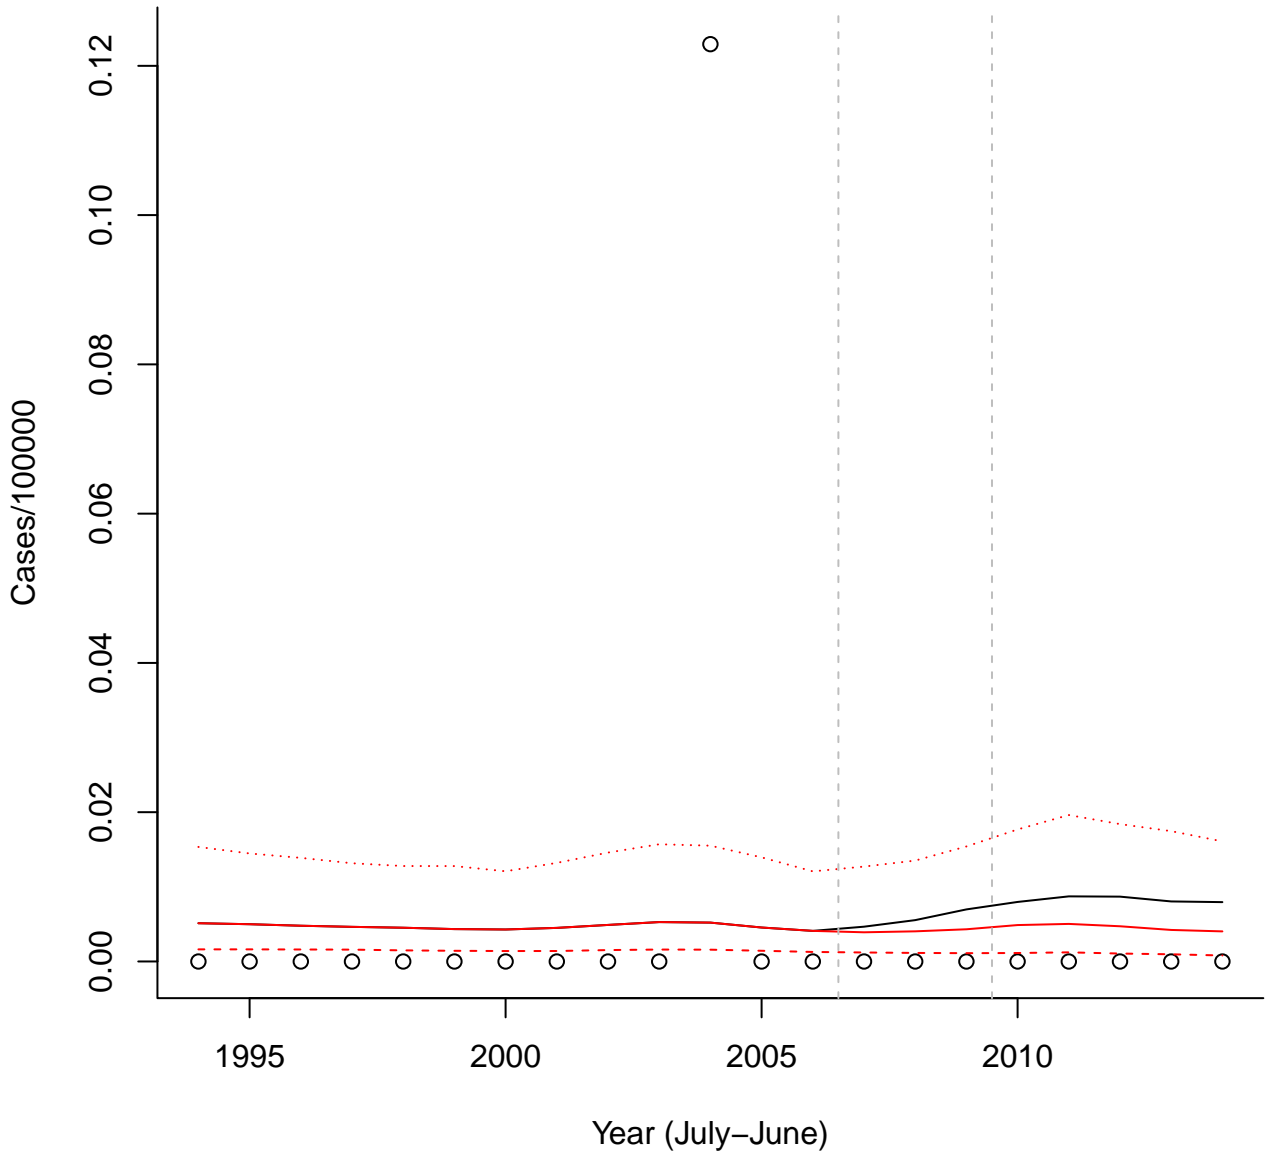

# 5-17y Without comorbidity Serotype 33F

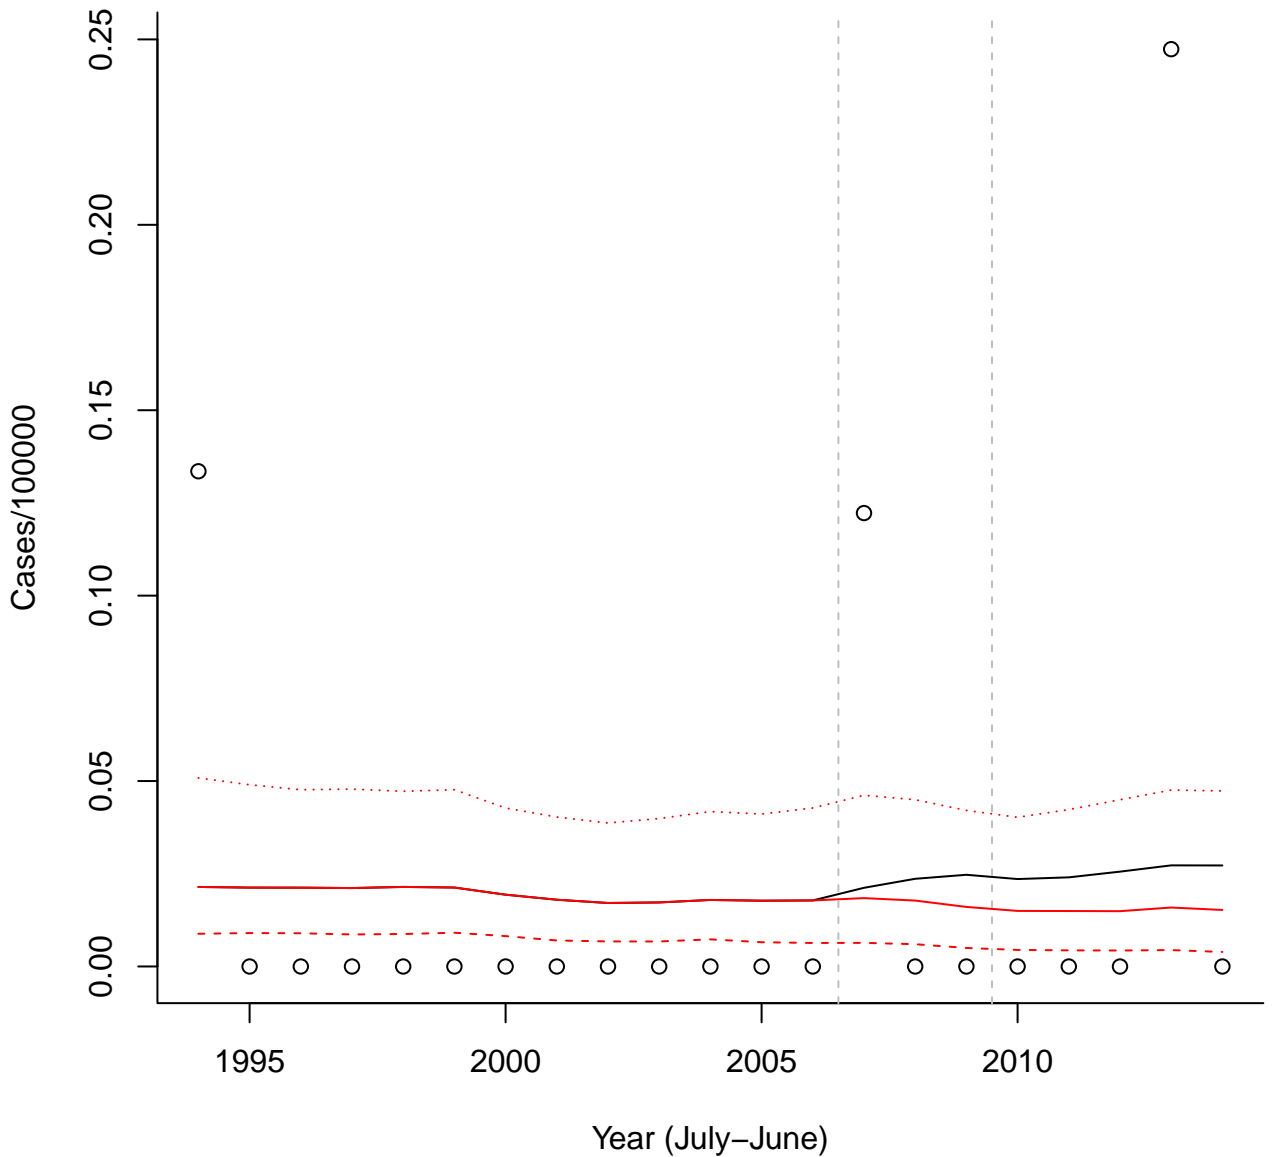



# 5-17y Without comorbidity Serotype 34

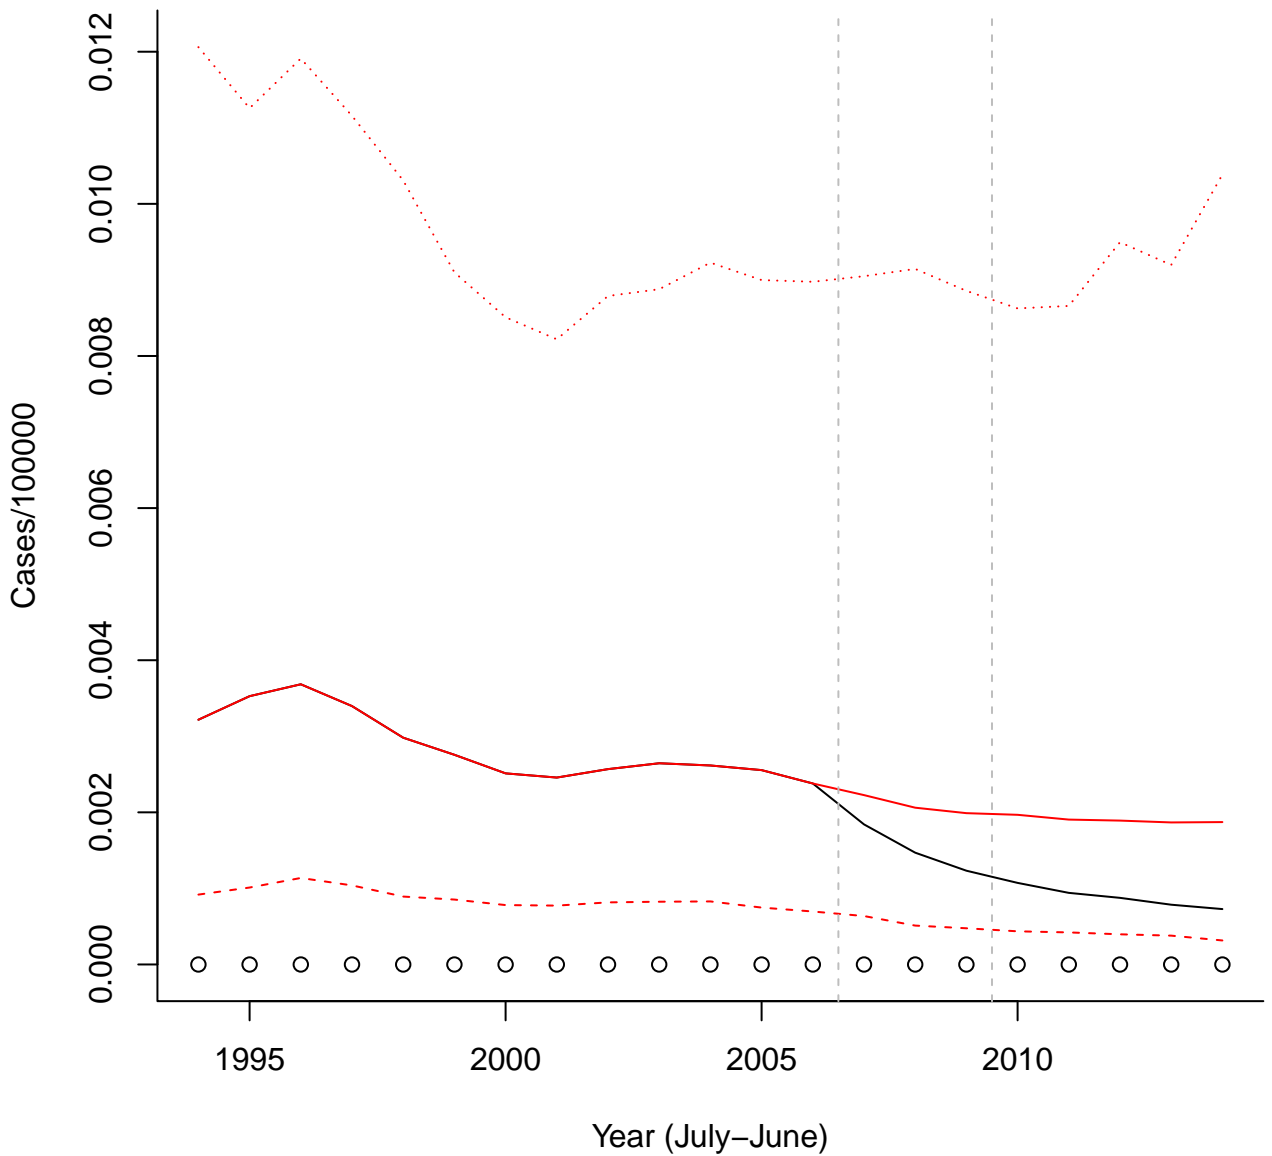

# 5-17y Without comorbidity Serotype 35B

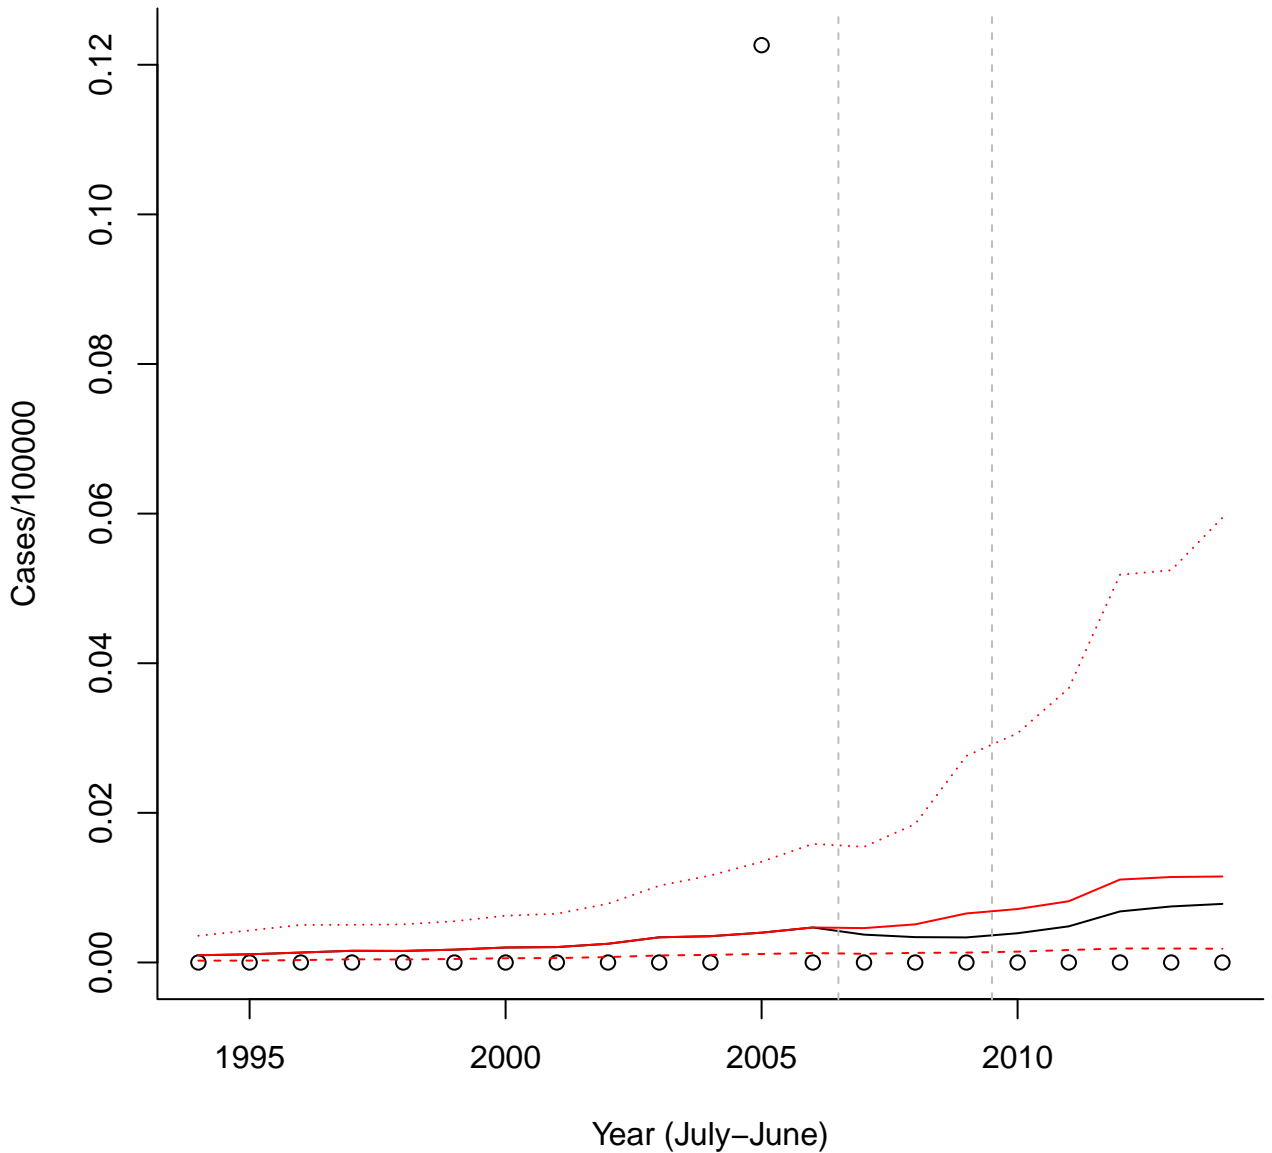

# 5-17y Without comorbidity Serotype 35F

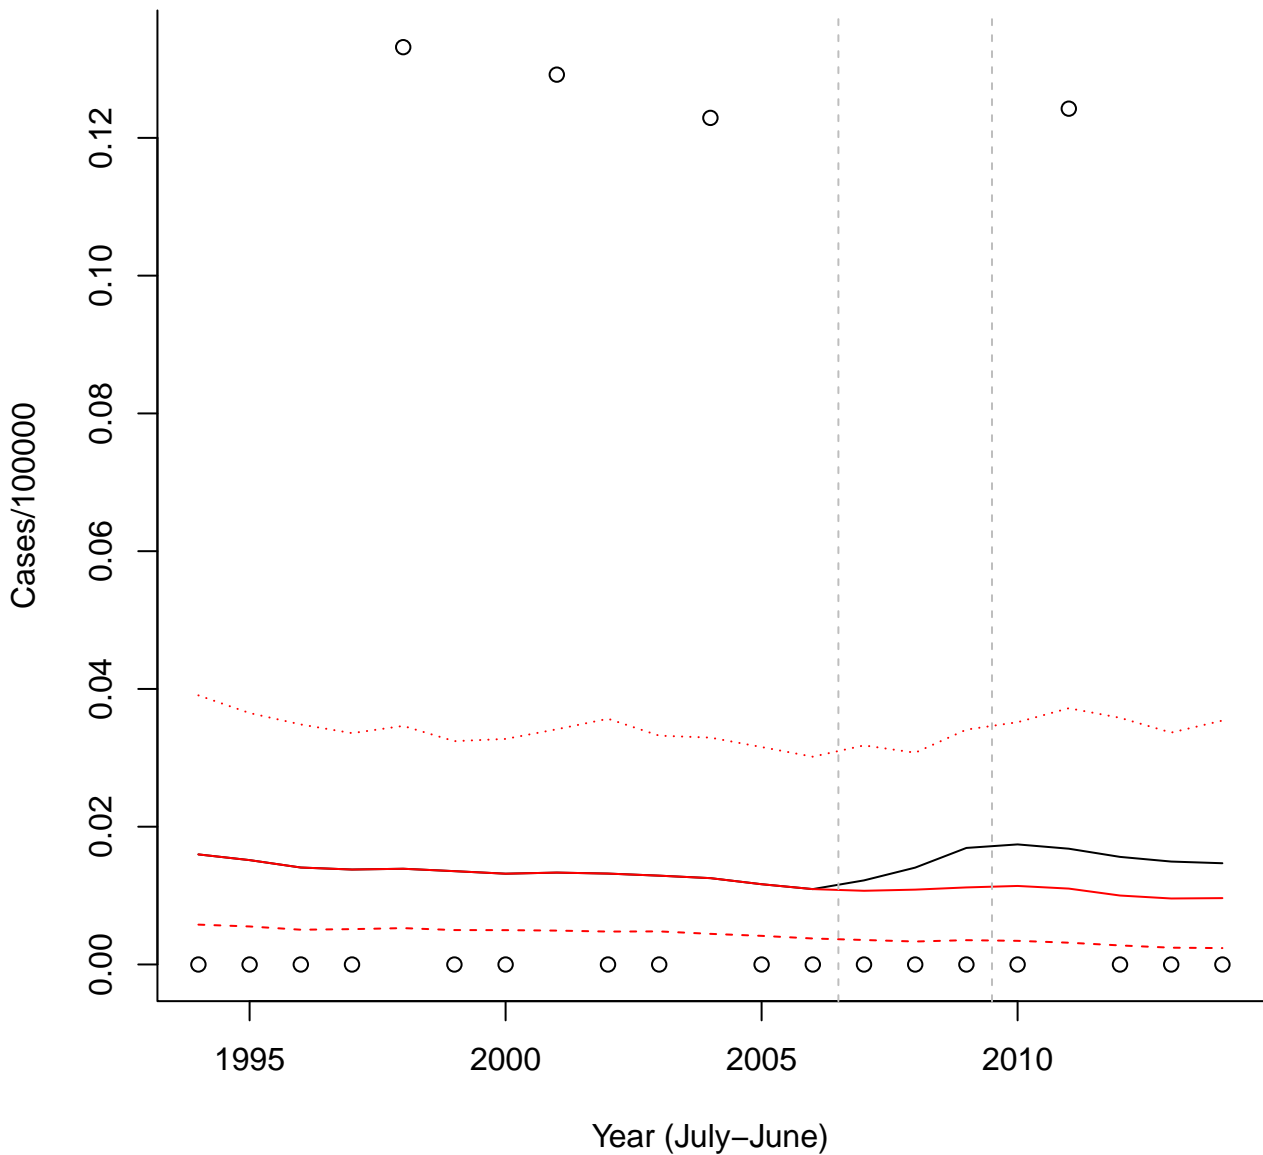

# 5-17y Without comorbidity Serotype 38

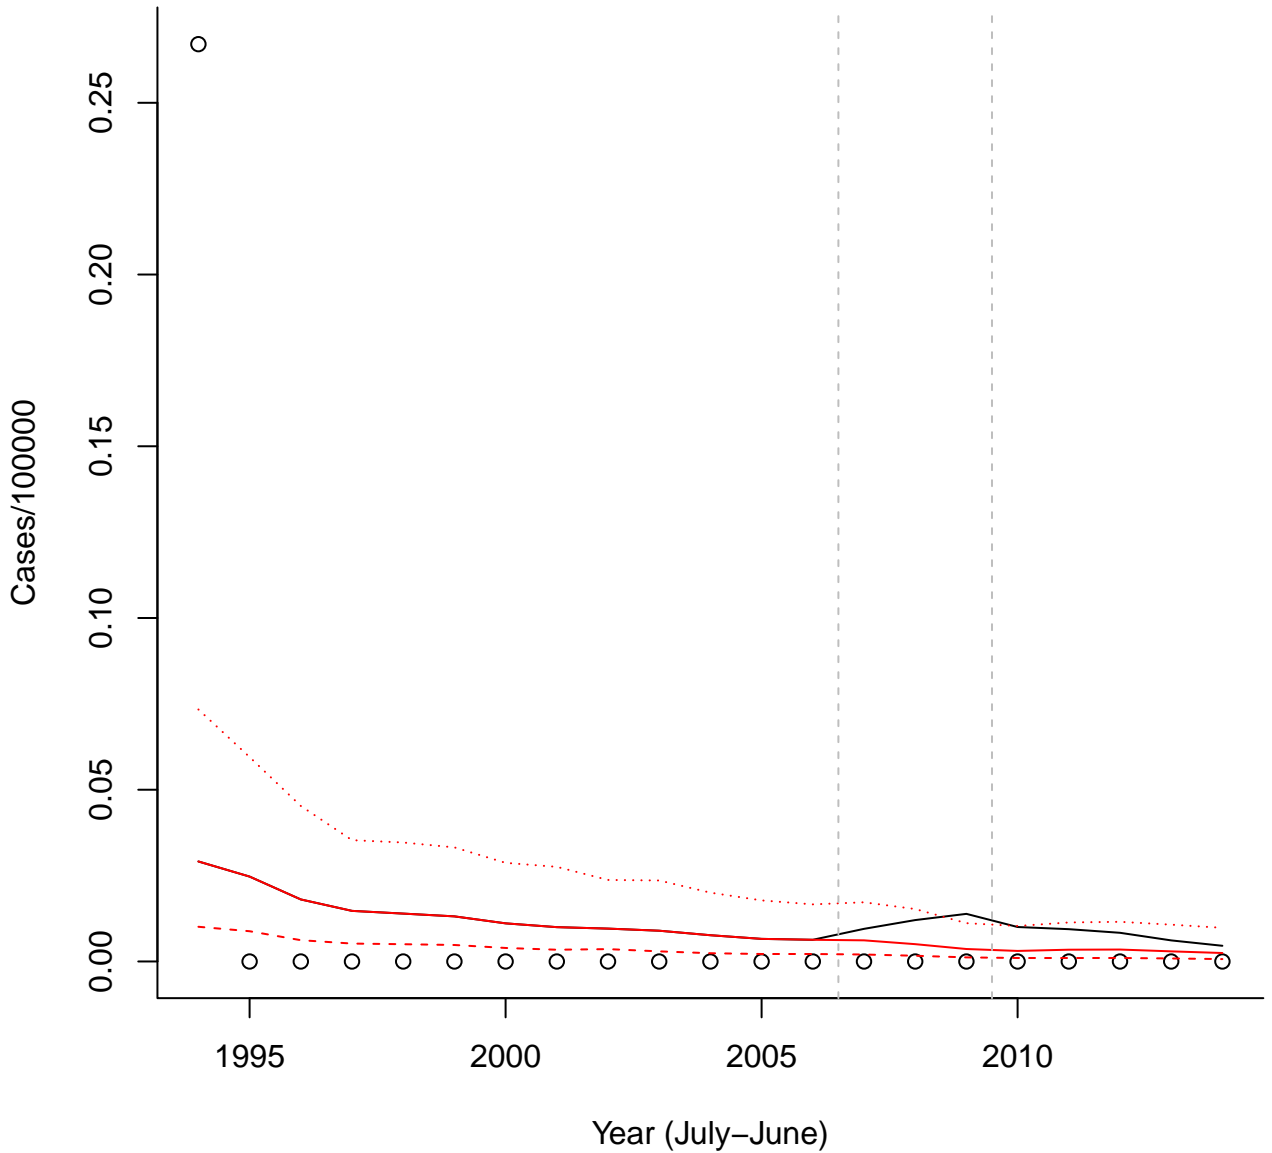

# 5-17y Without comorbidity Serotype 4

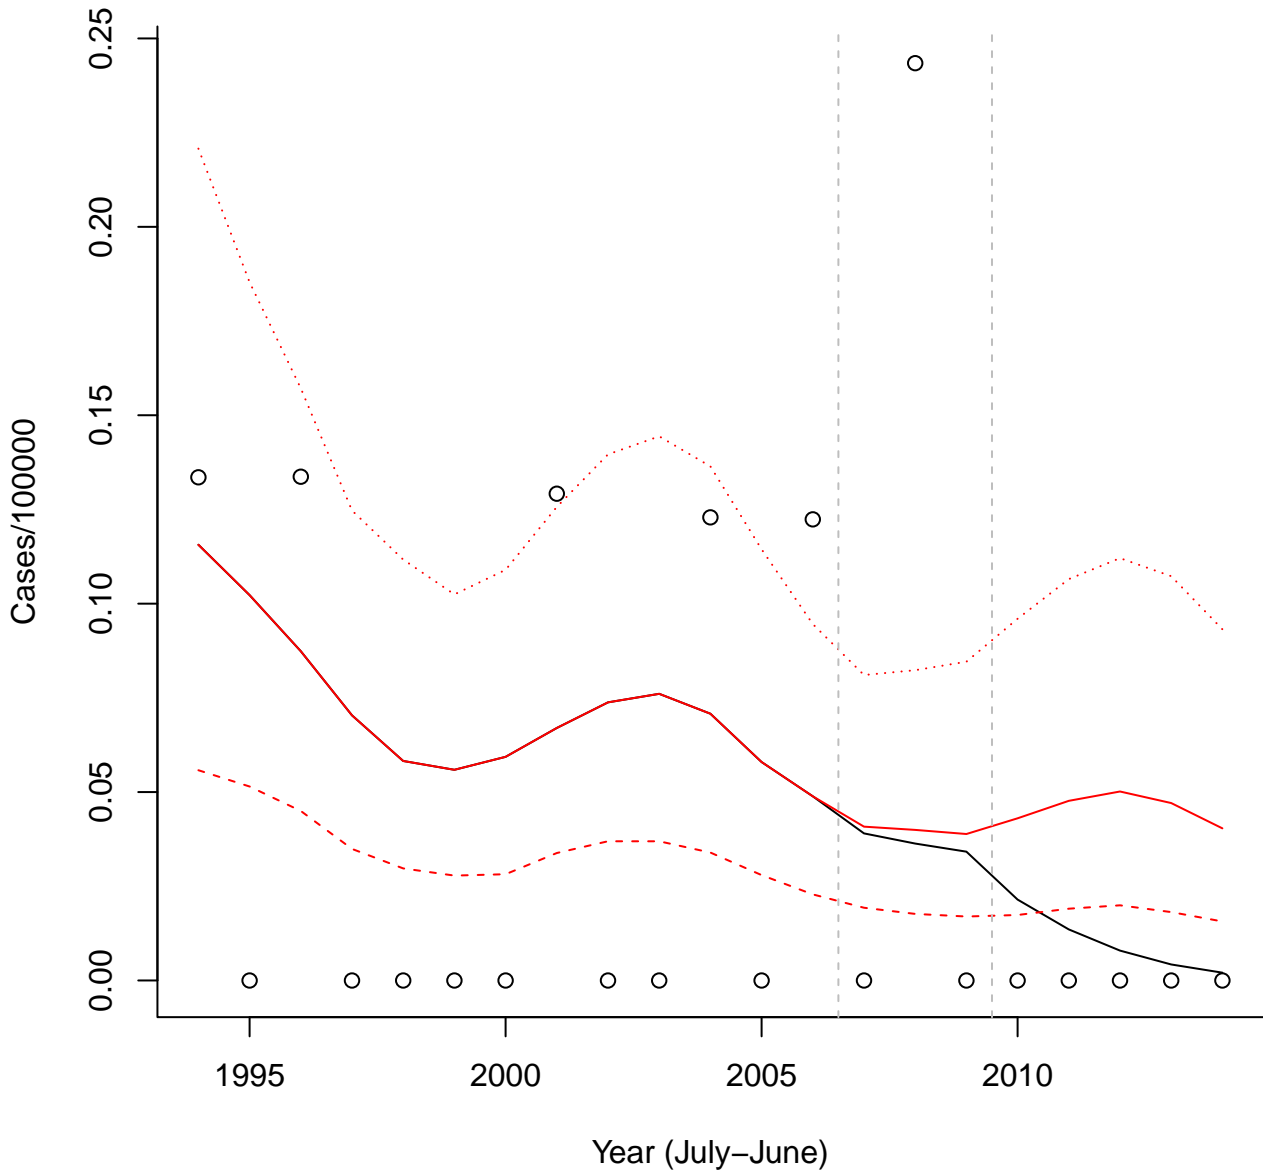

# 5-17y Without comorbidity Serotype 42

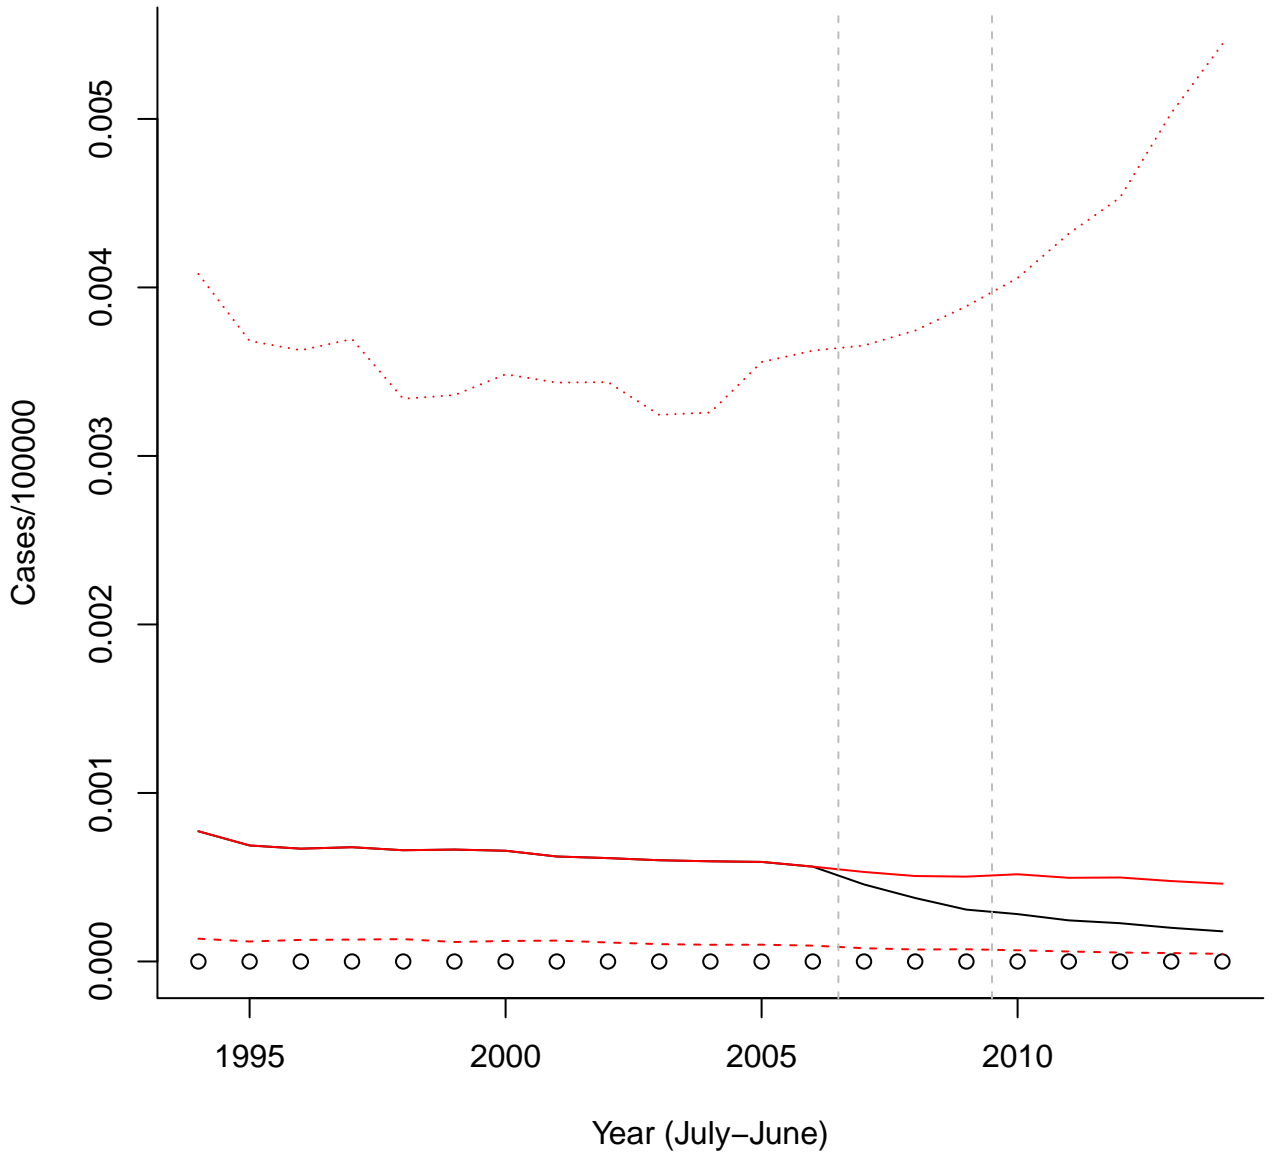

# 5-17y Without comorbidity Serotype 5

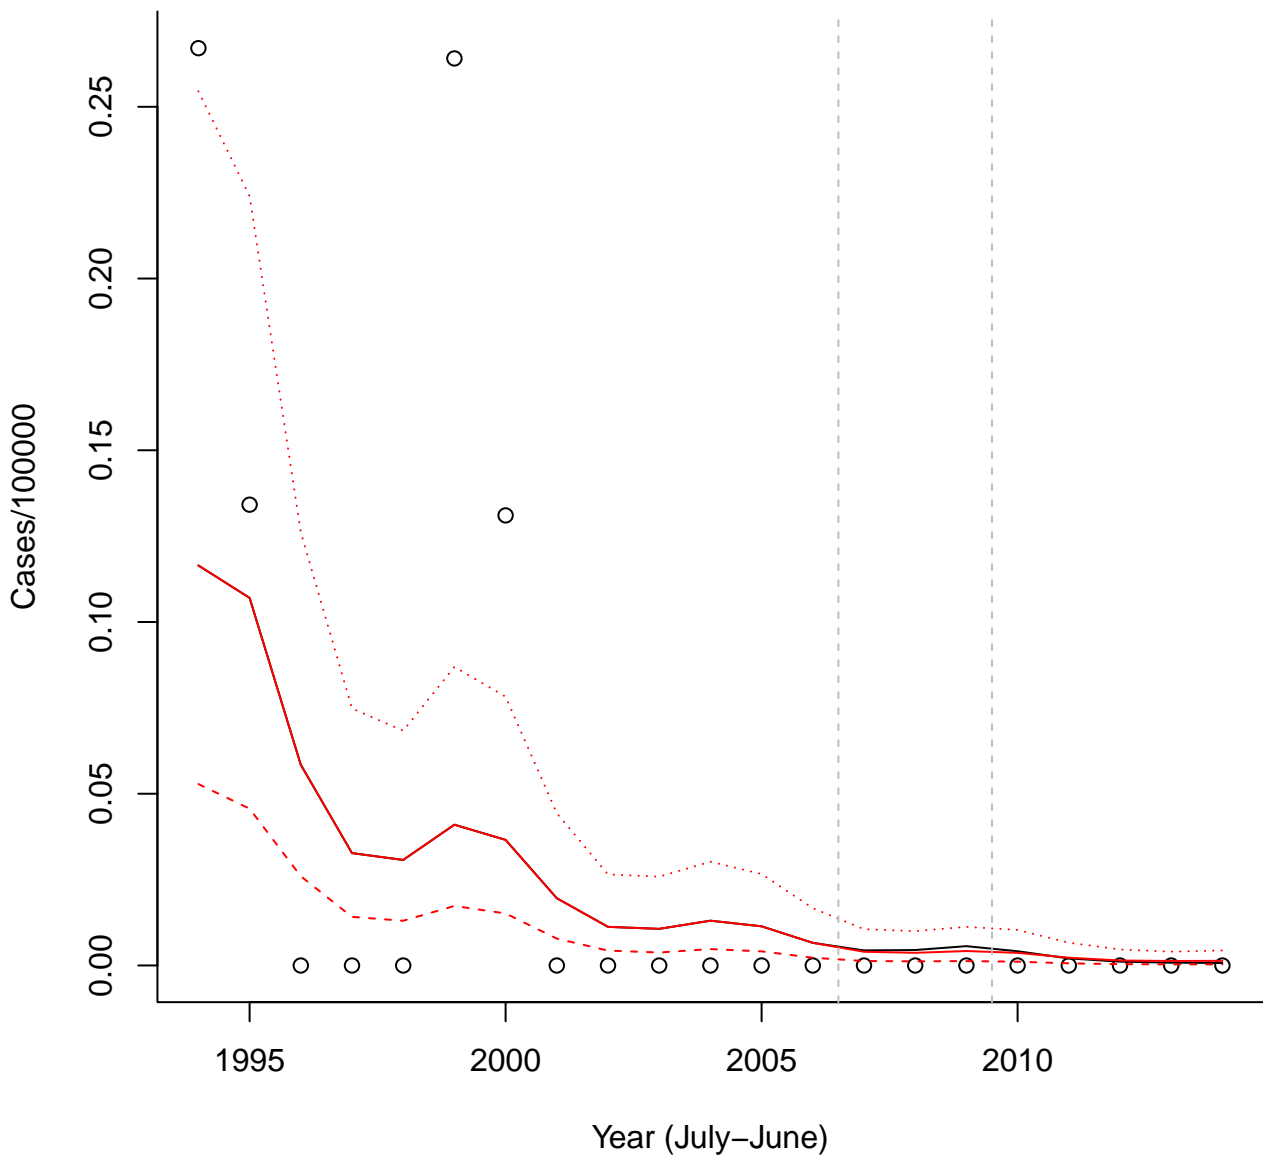

# 5-17y Without comorbidity Serotype 6A

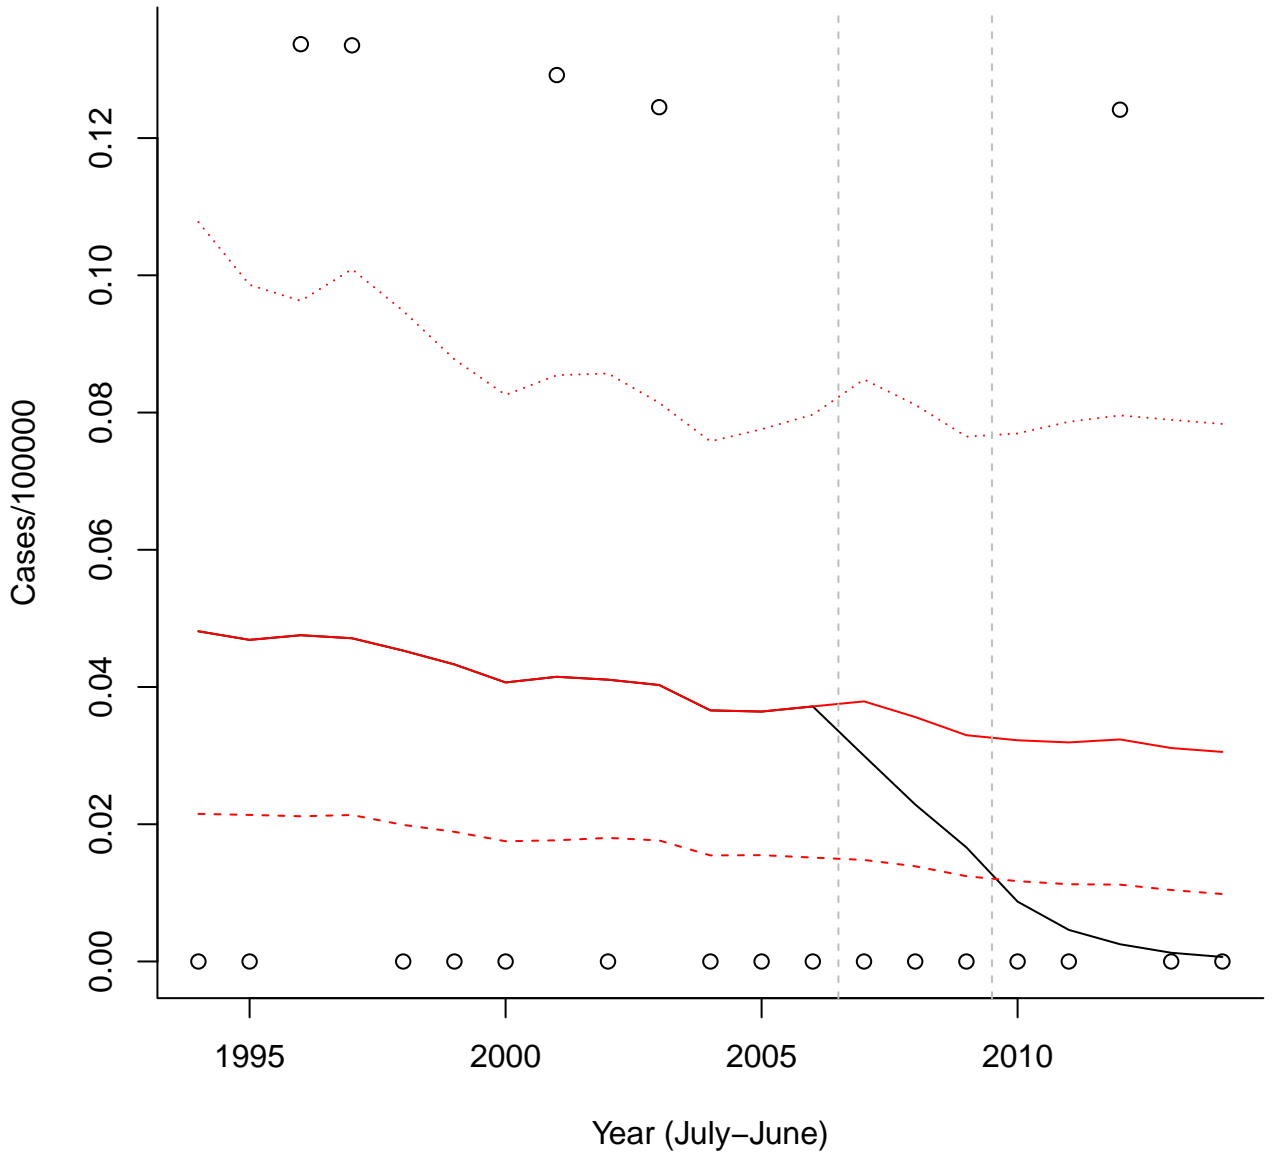



# 5-17y Without comorbidity Serotype 6B

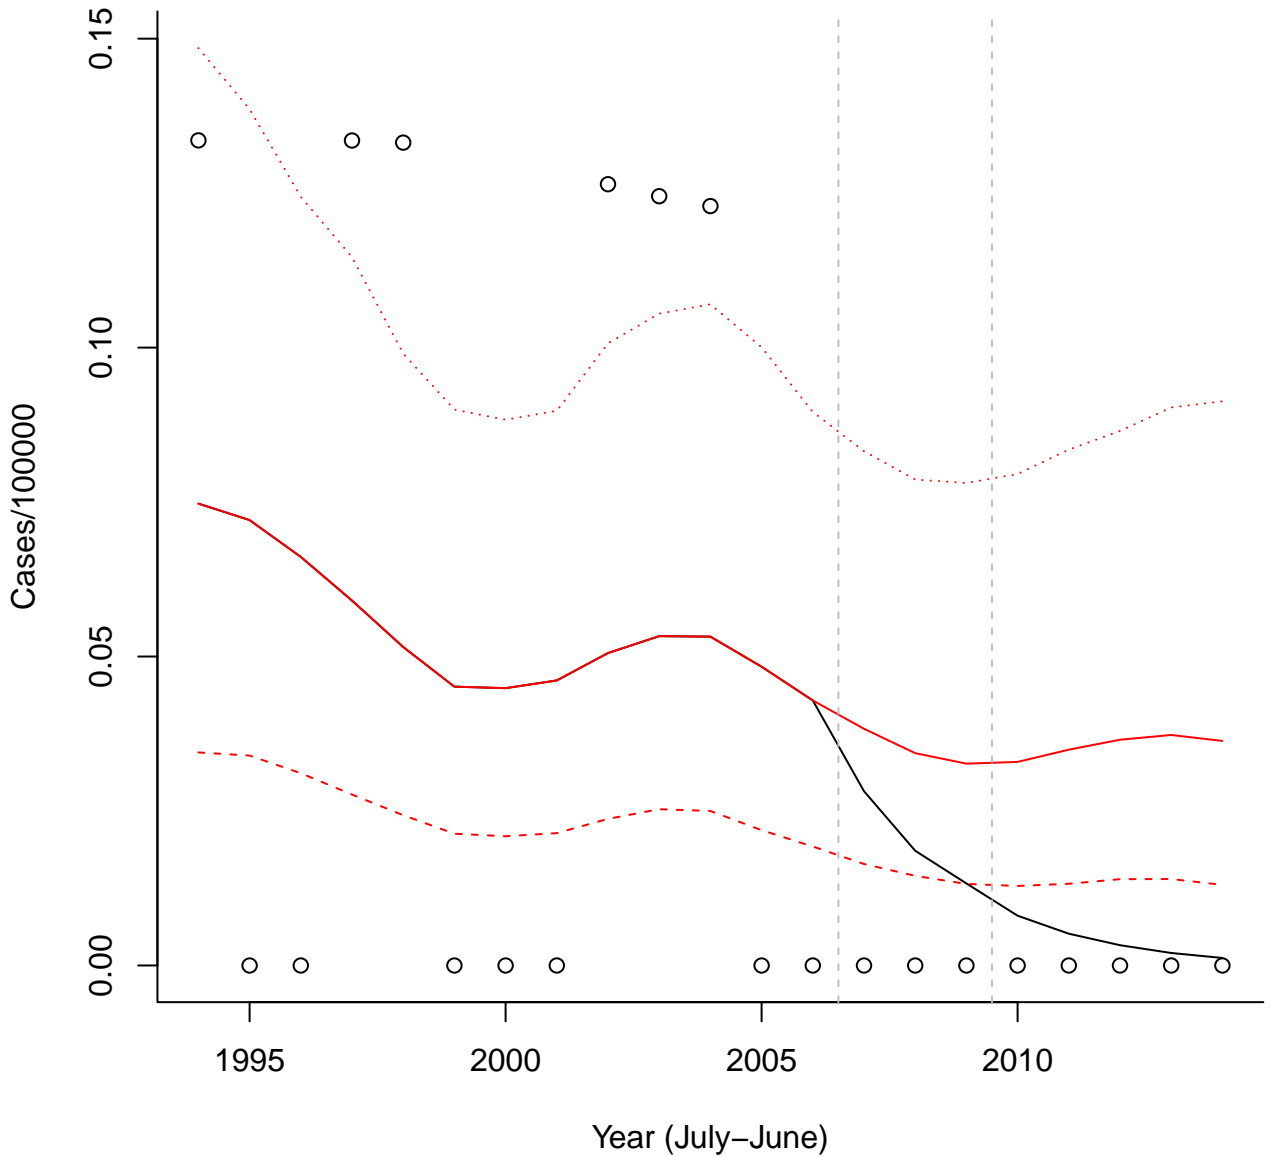

# 5-17y Without comorbidity Serotype 7A

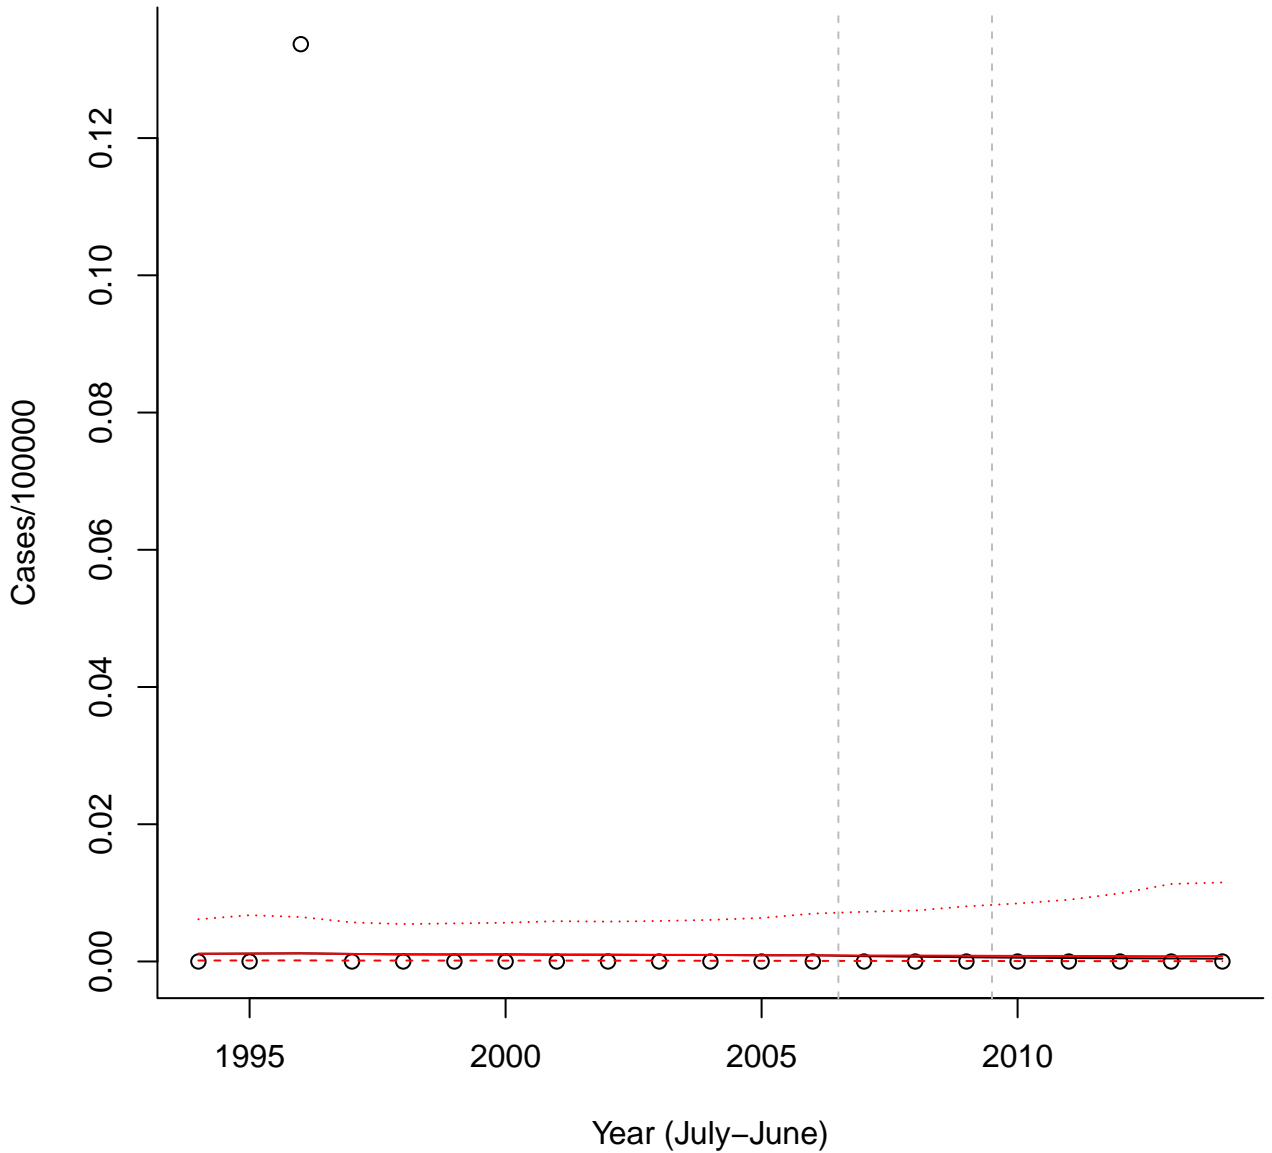

# 5-17y Without comorbidity Serotype 7F

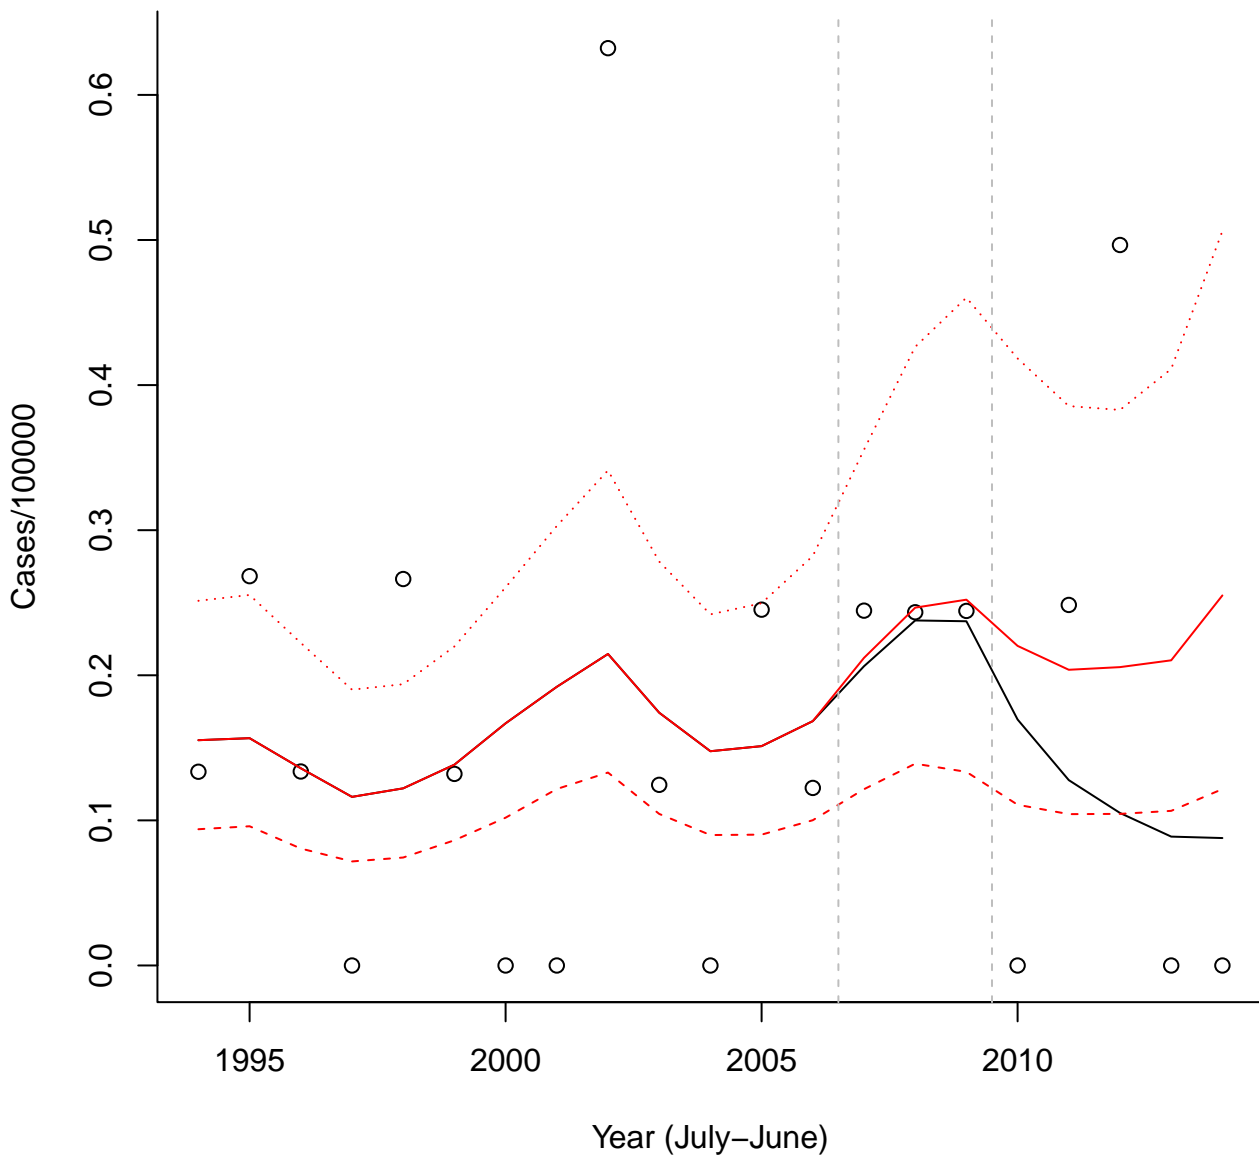

# 5-17y Without comorbidity Serotype 8

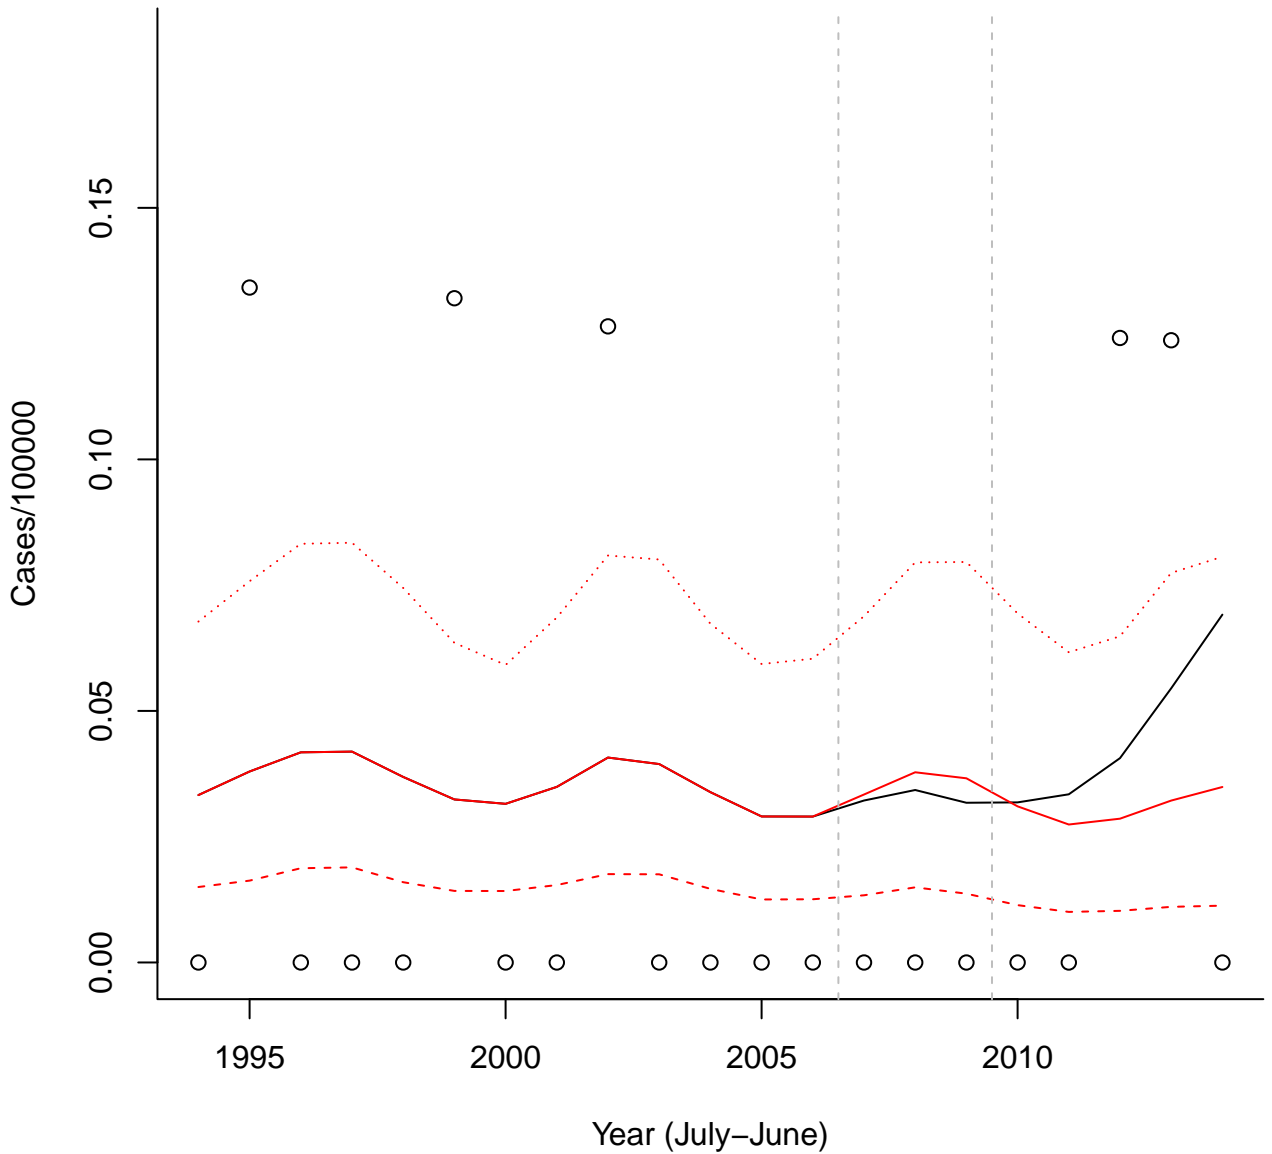

# 5-17y Without comorbidity Serotype 9N

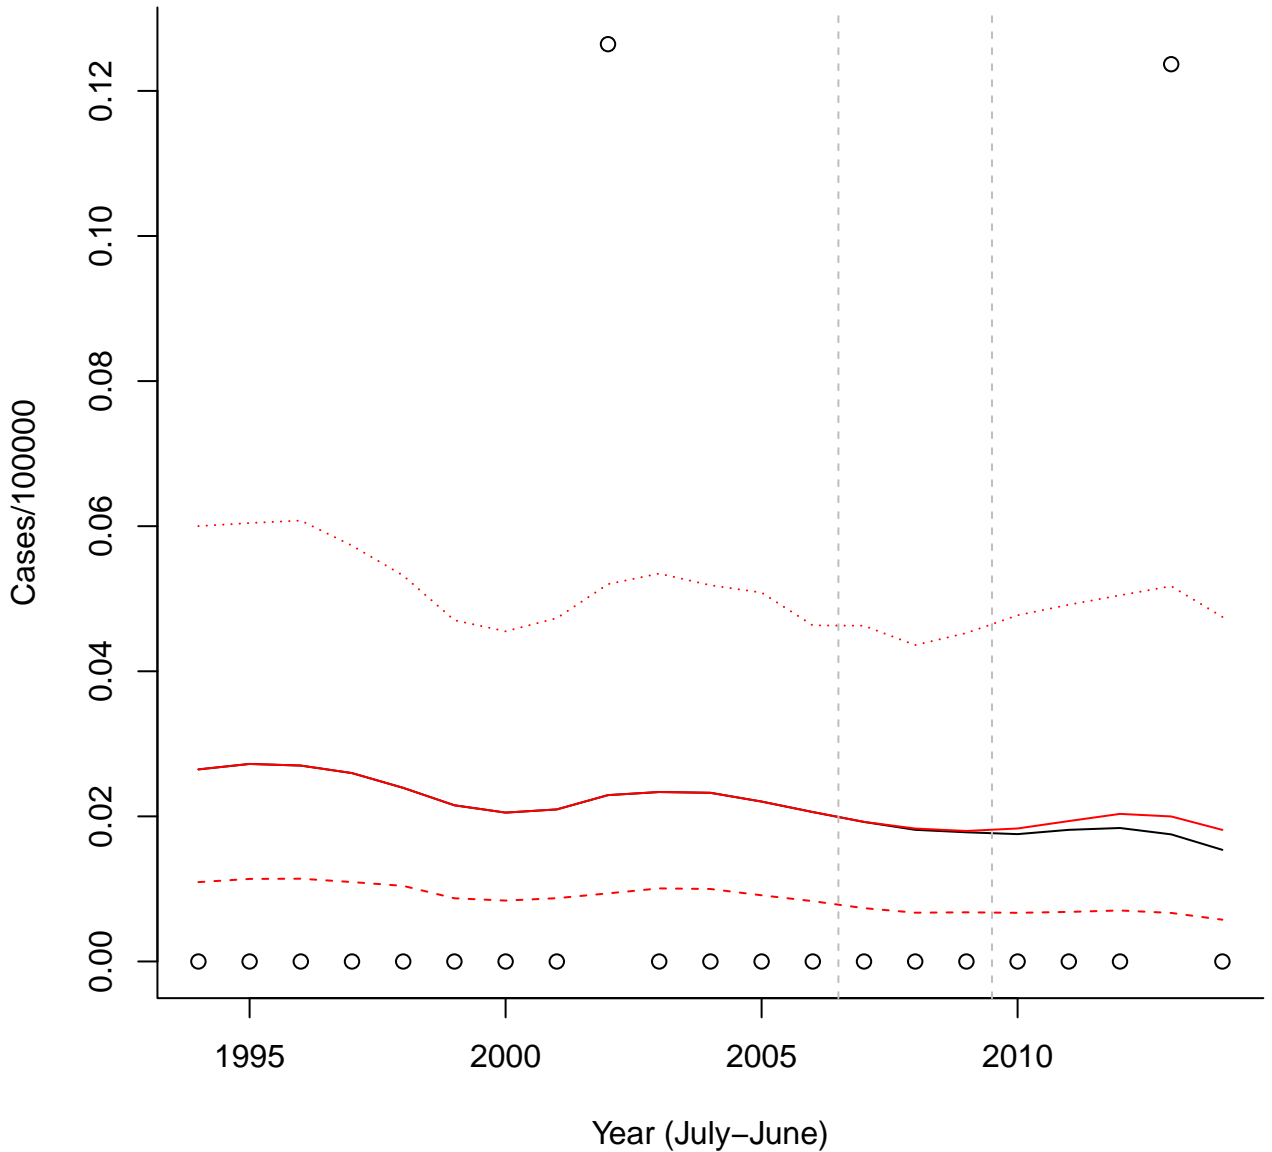

# 5-17y Without comorbidity Serotype 9V

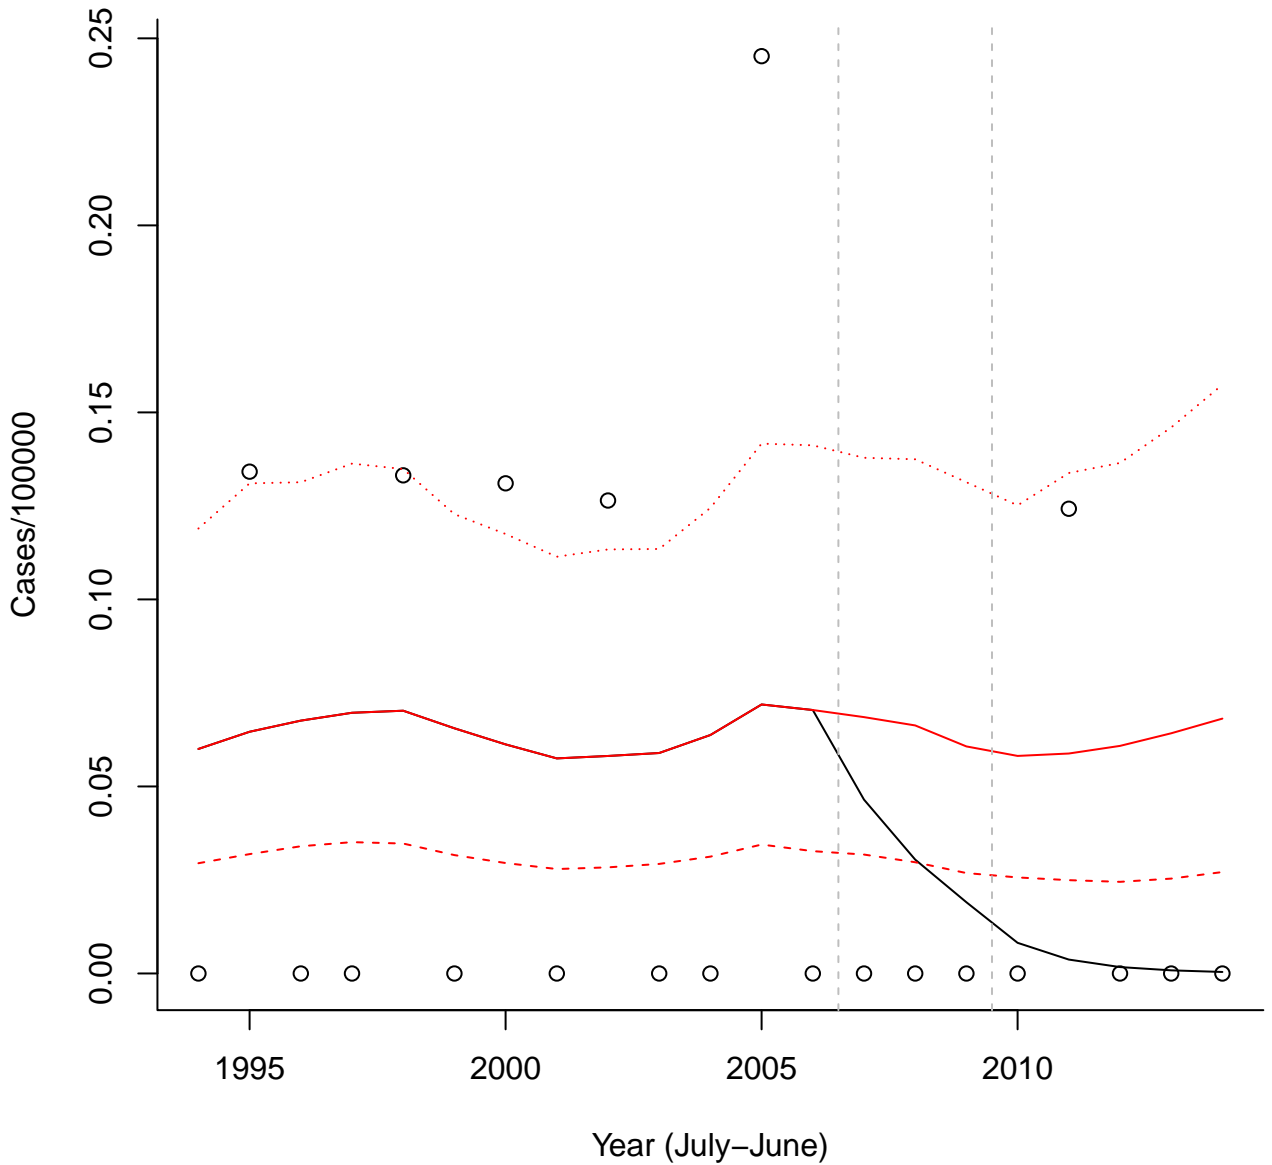

# 5–17y Without comorbidity Serotype OT0

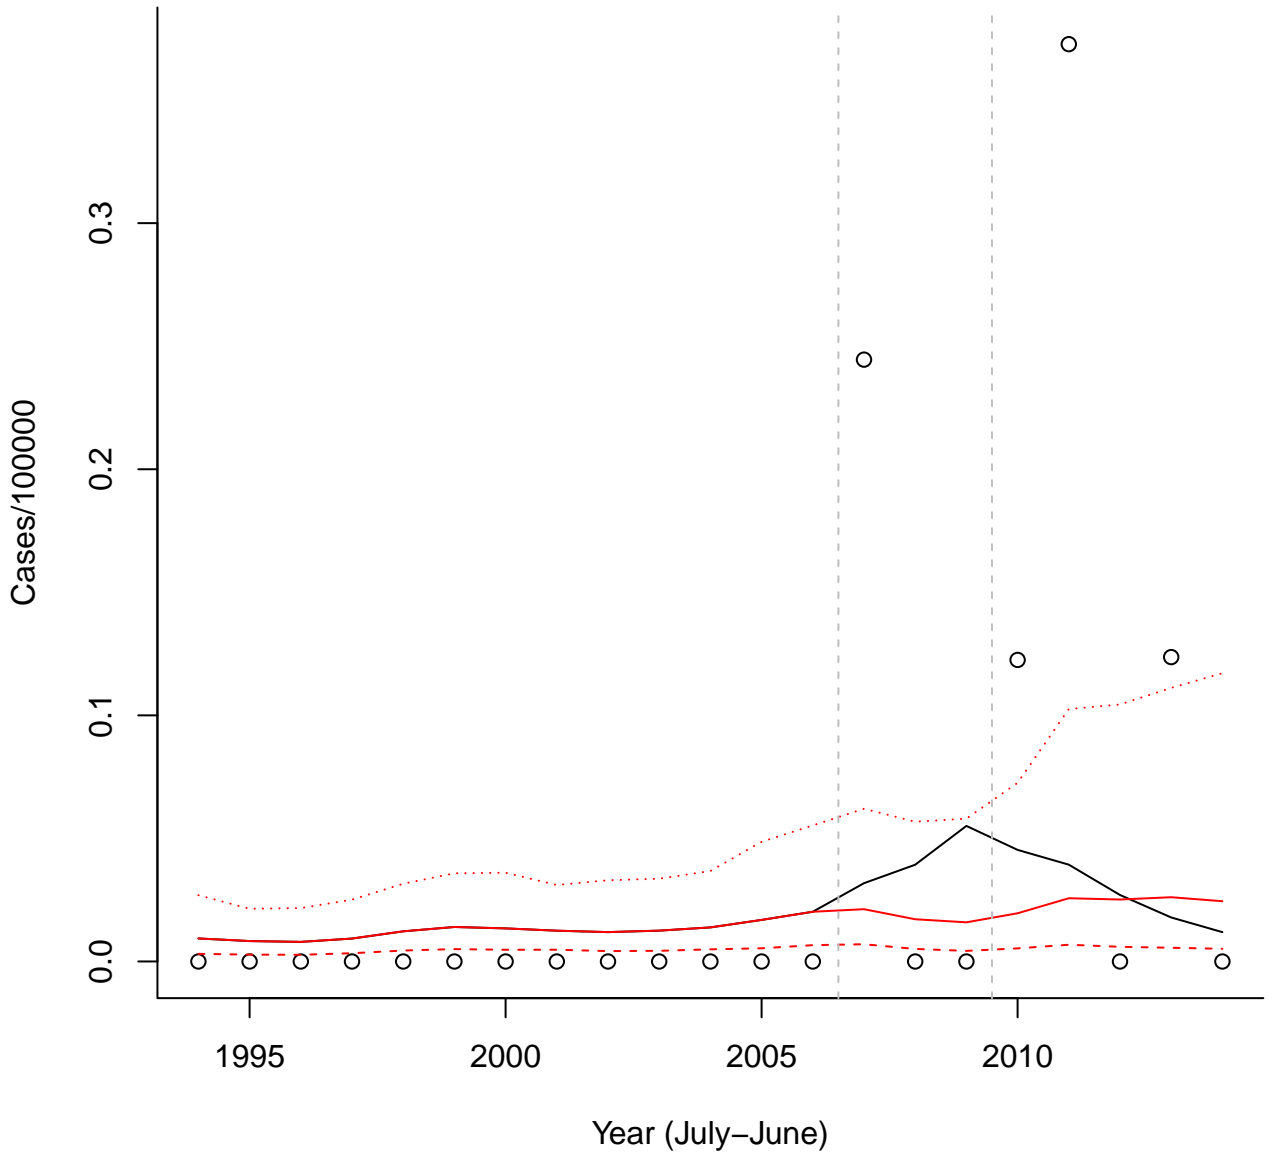

# 18–39y Without comorbidity Serotype 1

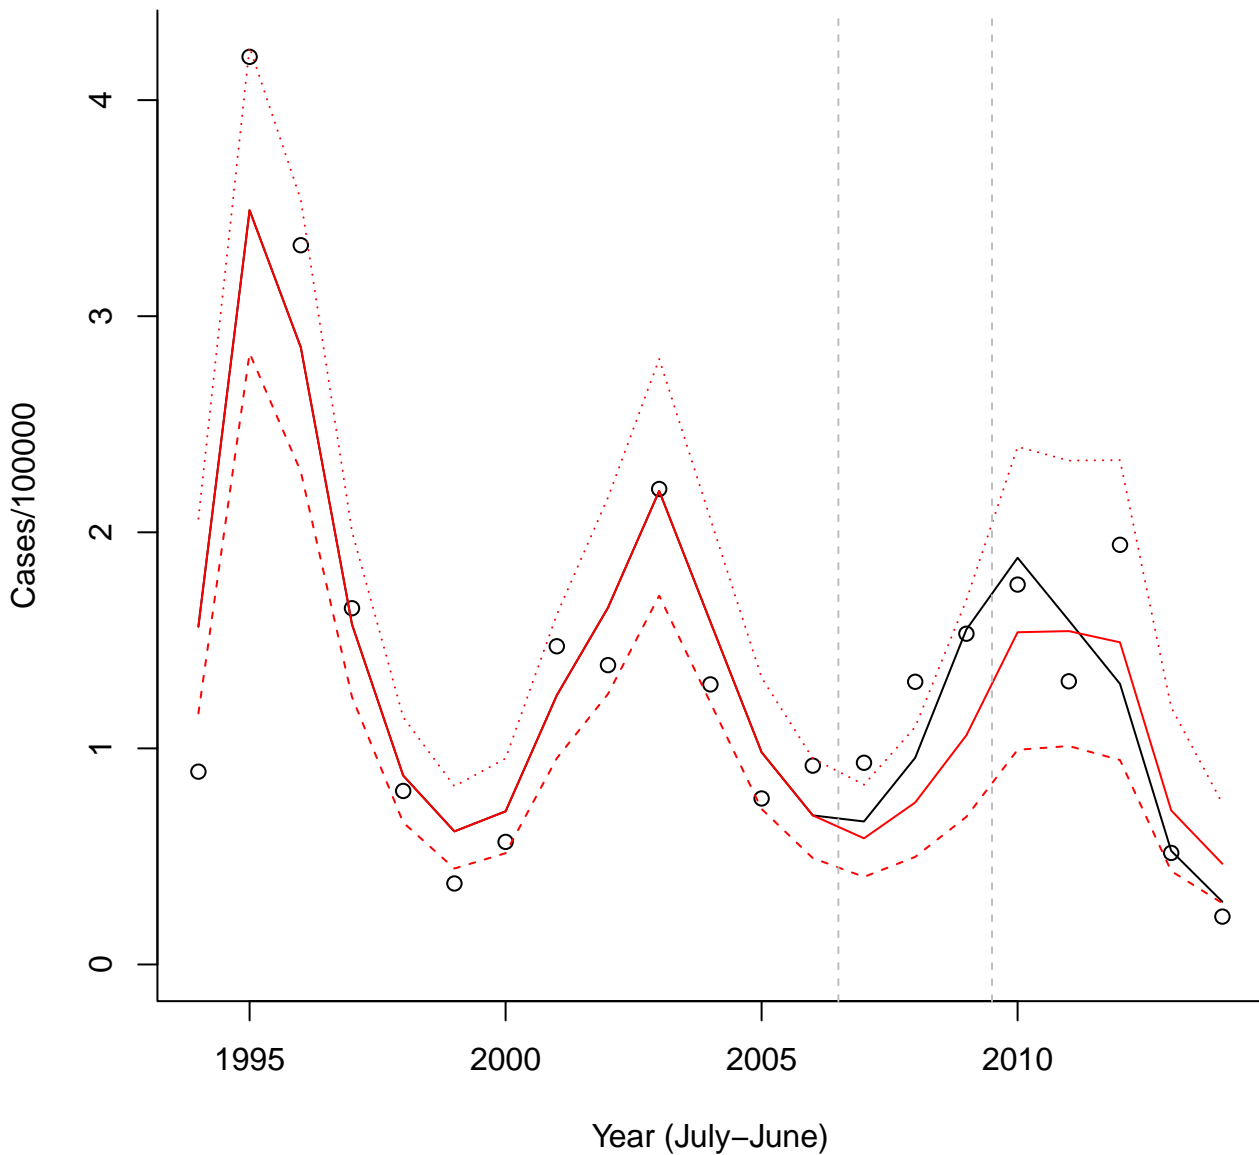



# 18-39y Without comorbidity Serotype 10A

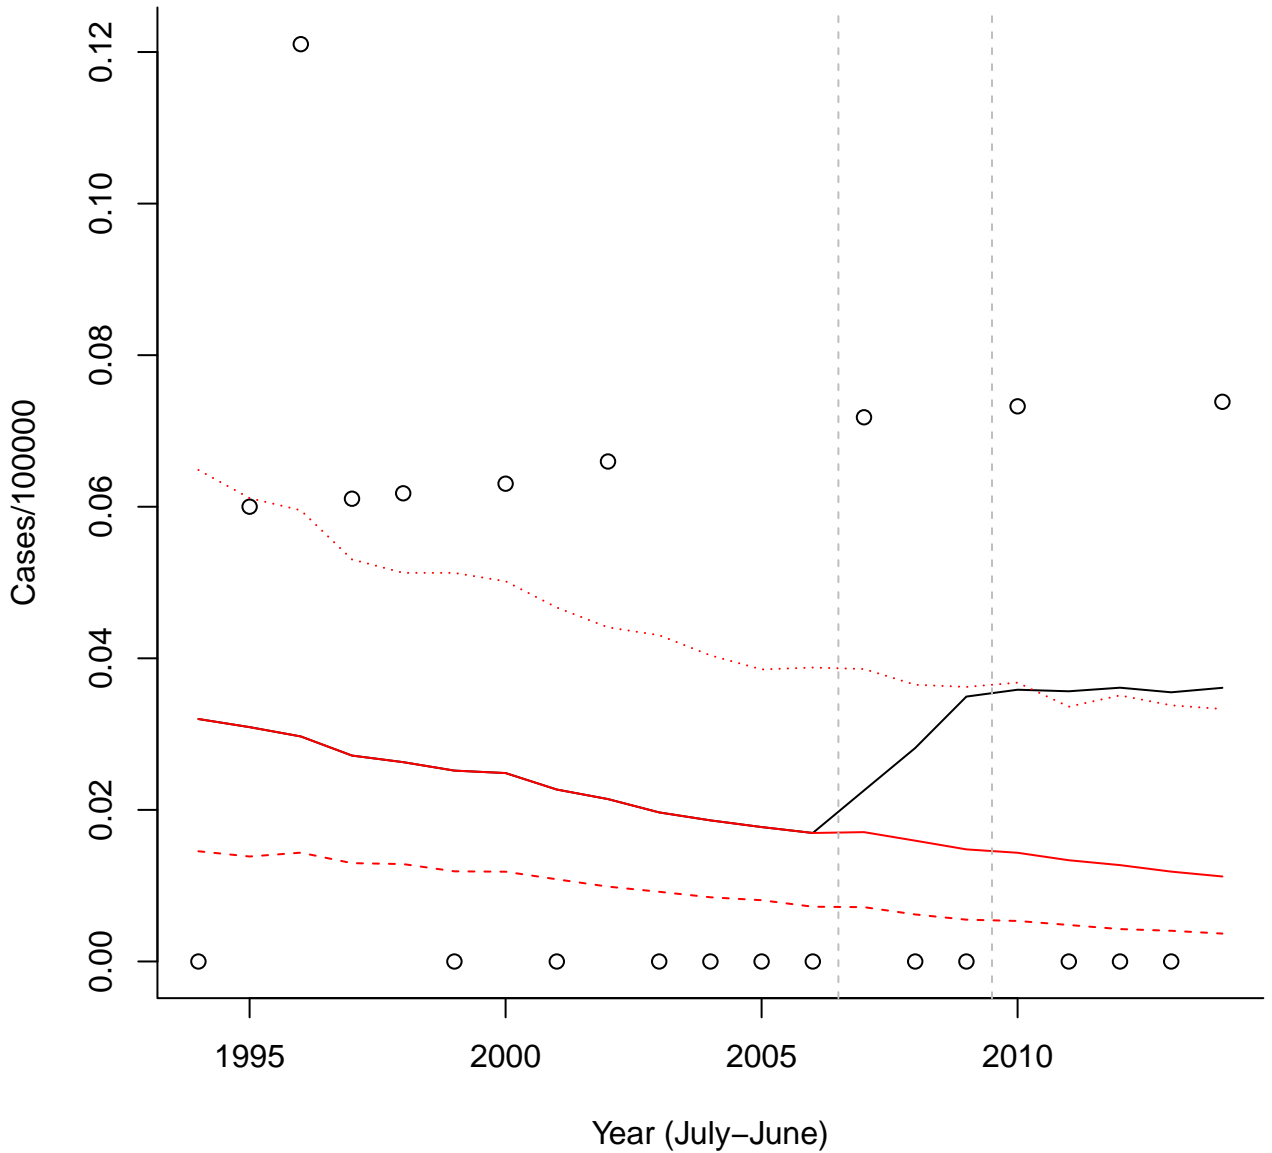

# 18–39y Without comorbidity Serotype 11A

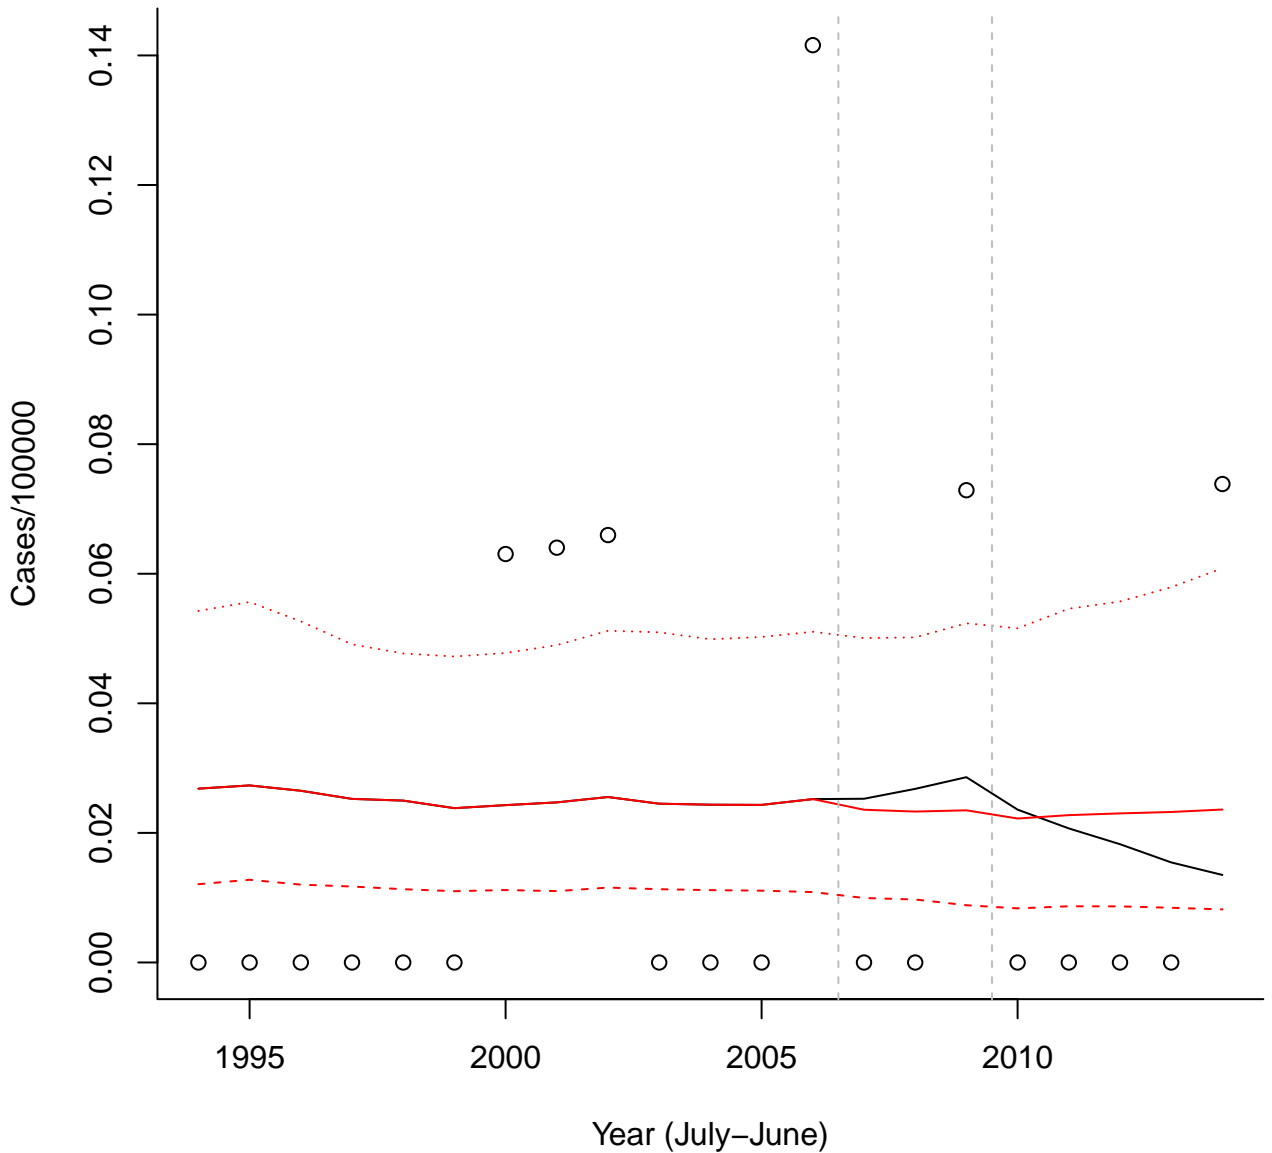

# 18–39y Without comorbidity Serotype 12A

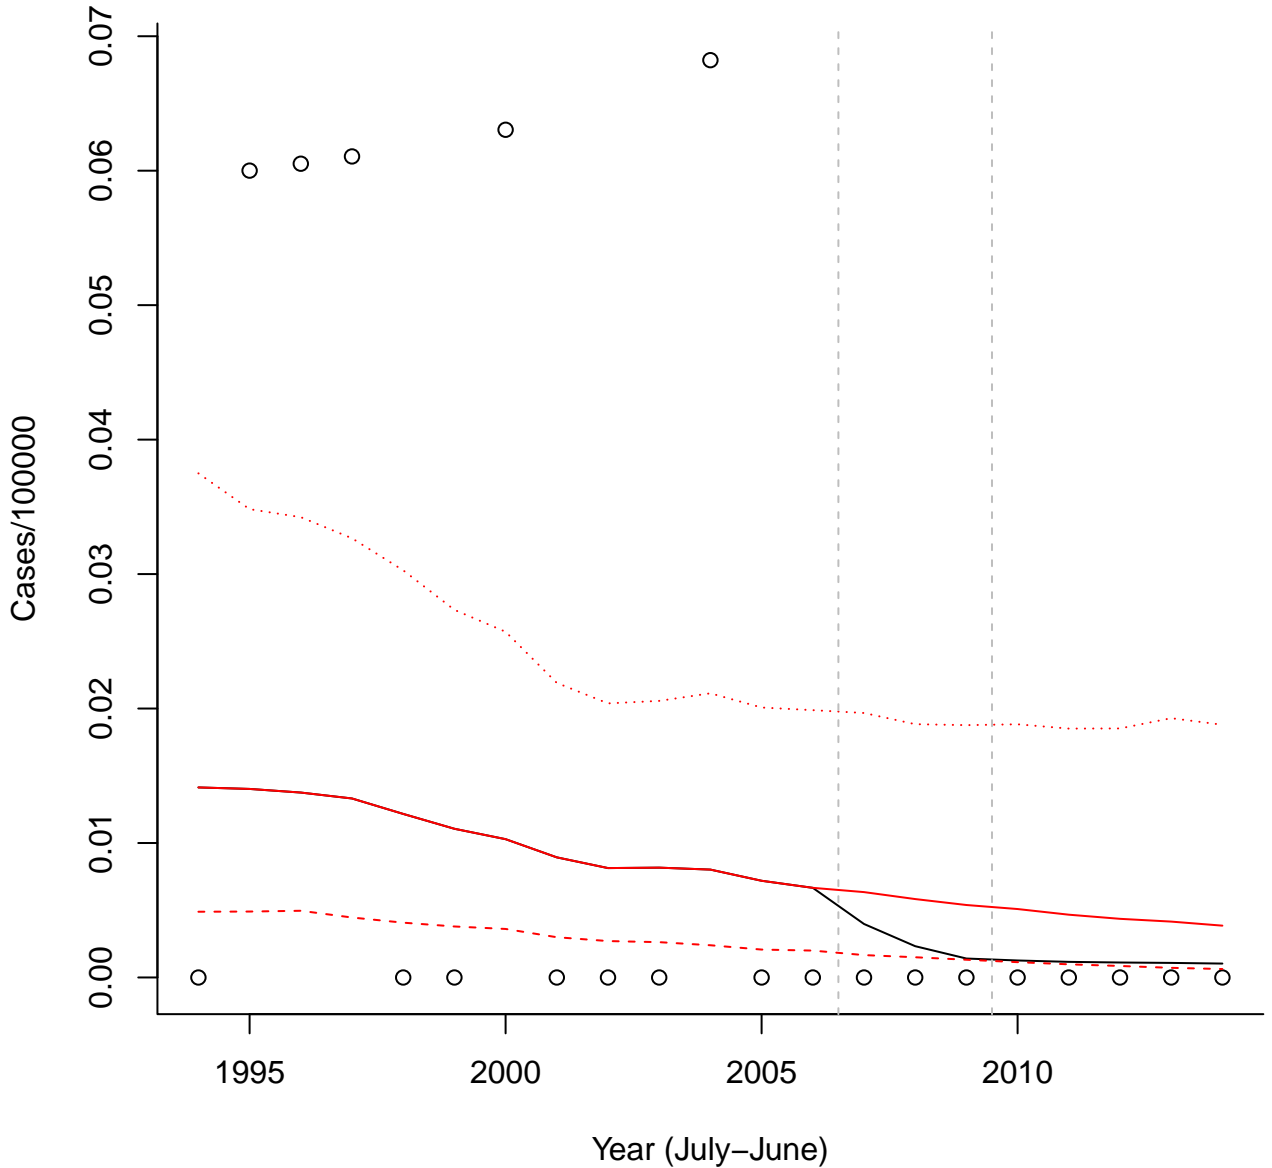

# 18-39y Without comorbidity Serotype 12F

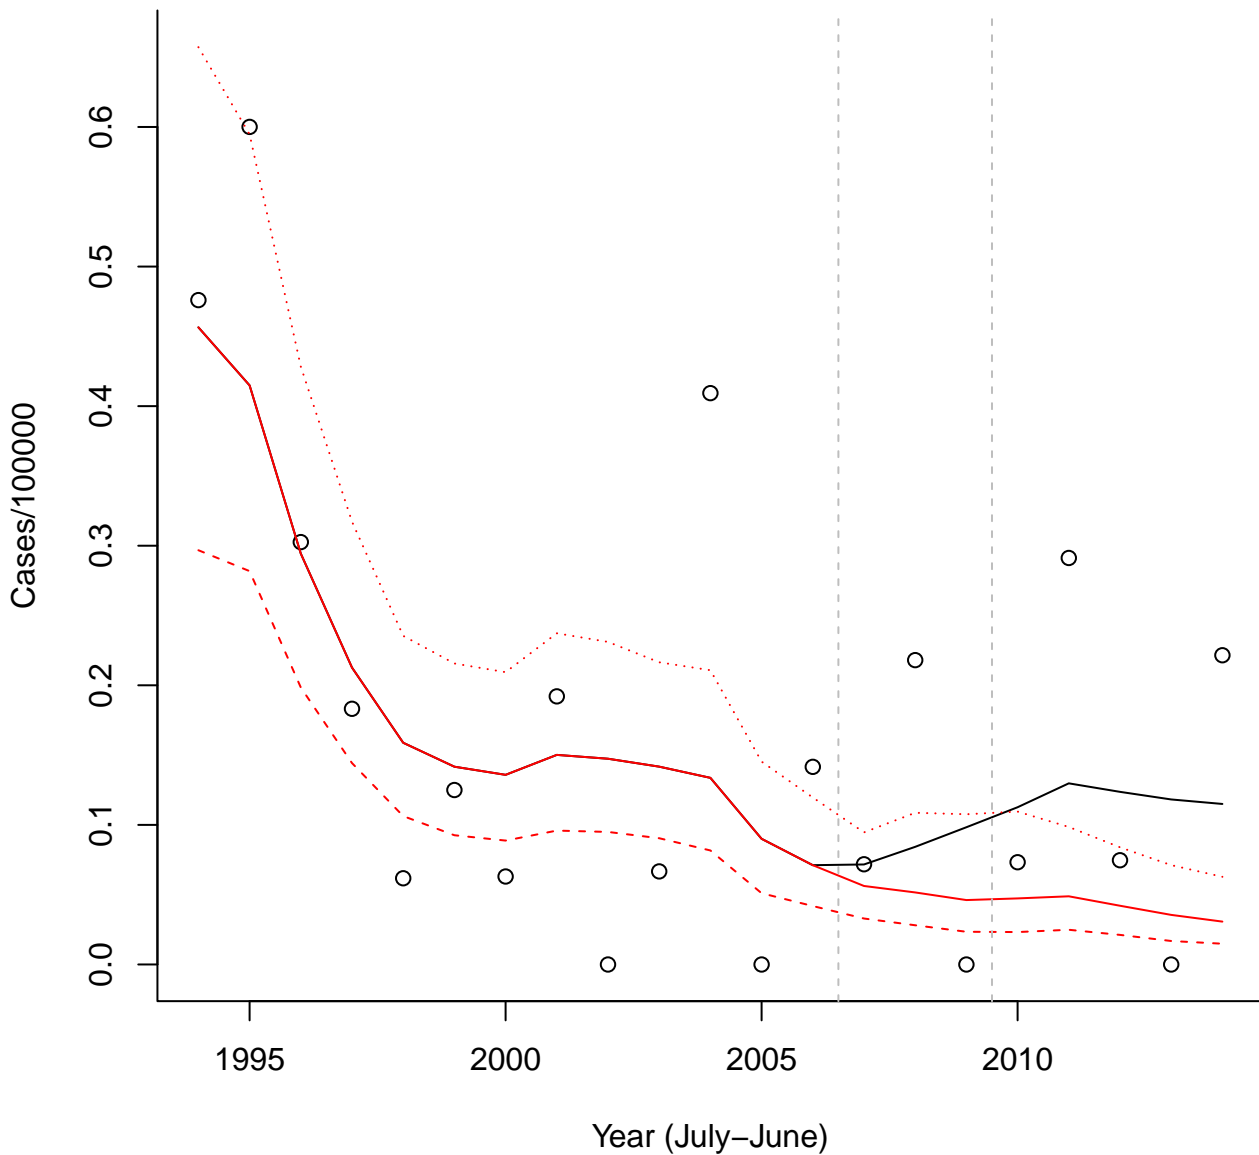

# 18–39y Without comorbidity Serotype 14

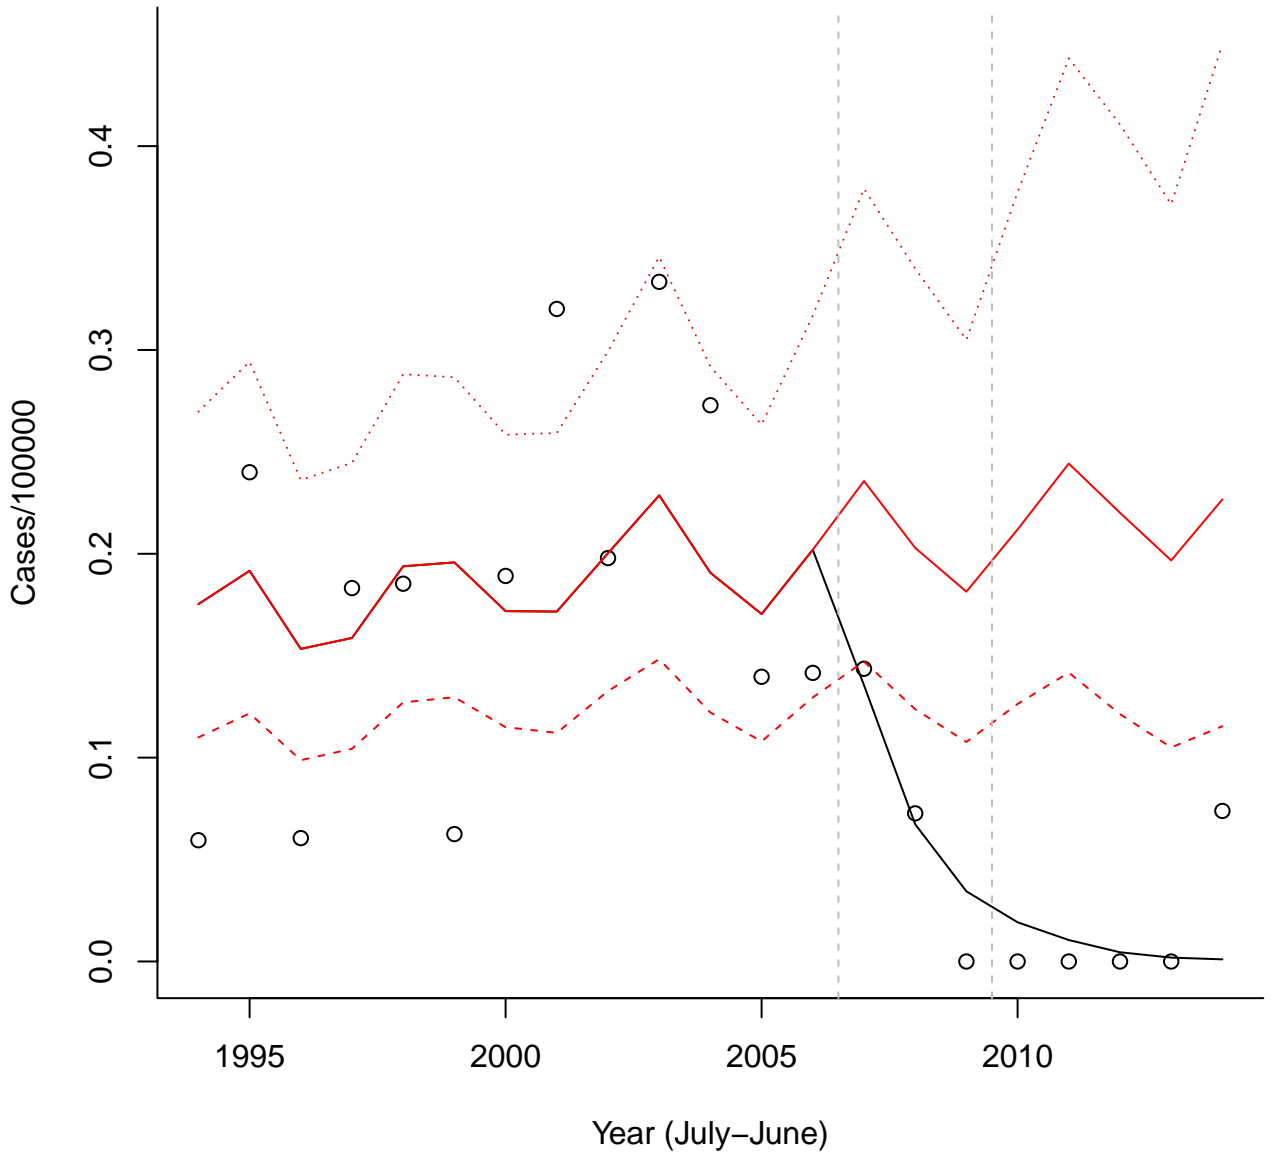

# 18–39y Without comorbidity Serotype 15A

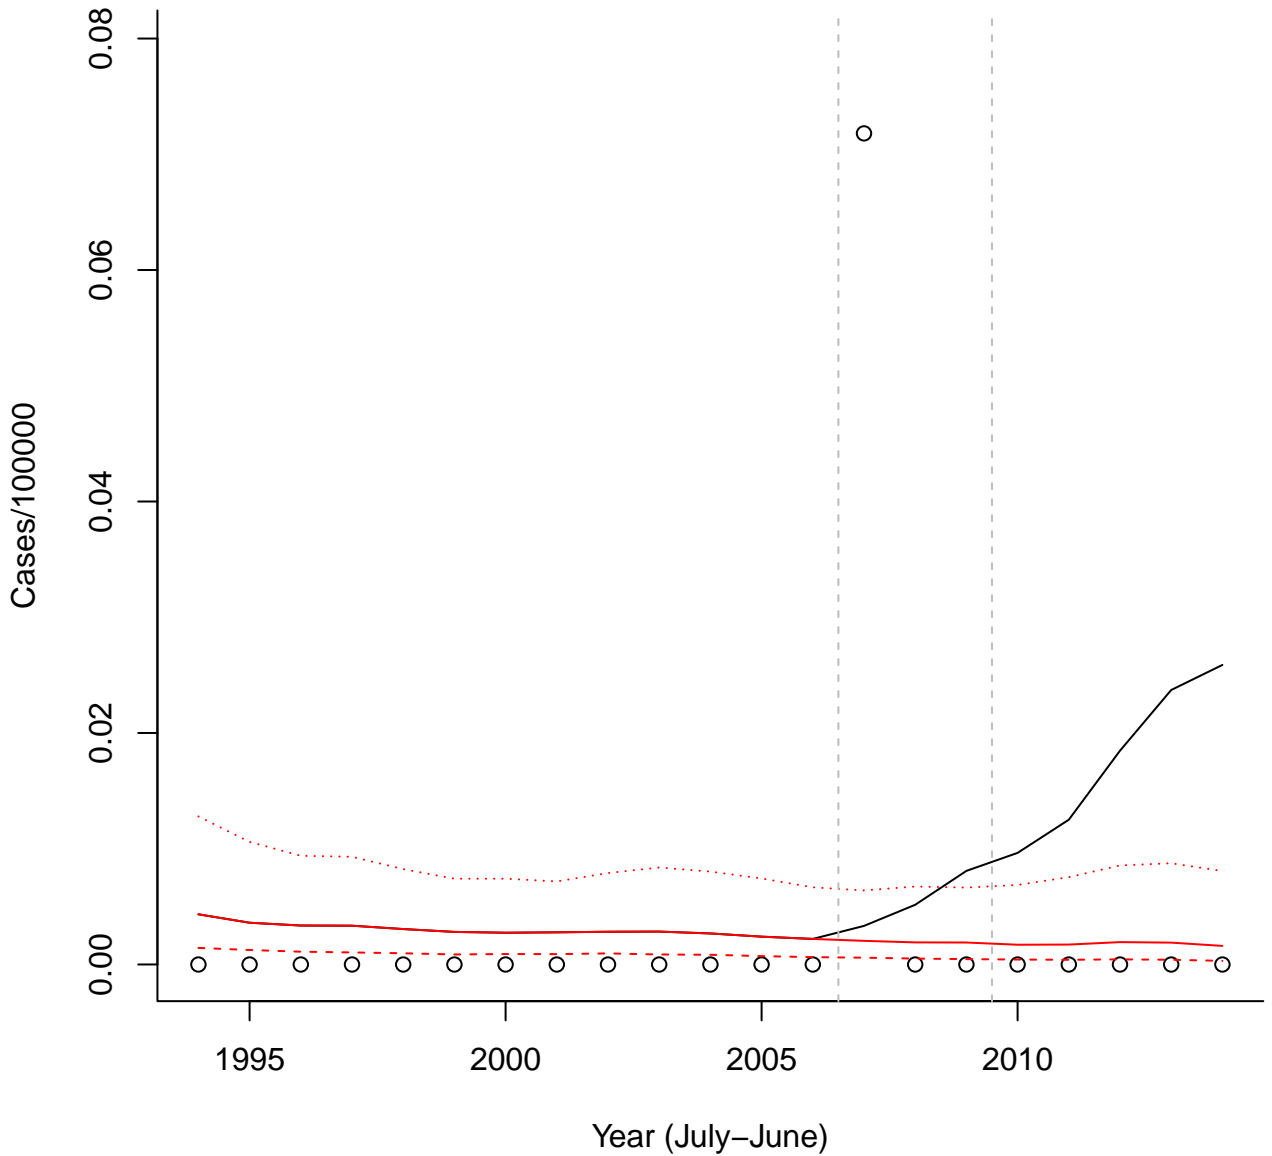

# 18-39y Without comorbidity Serotype 15BC

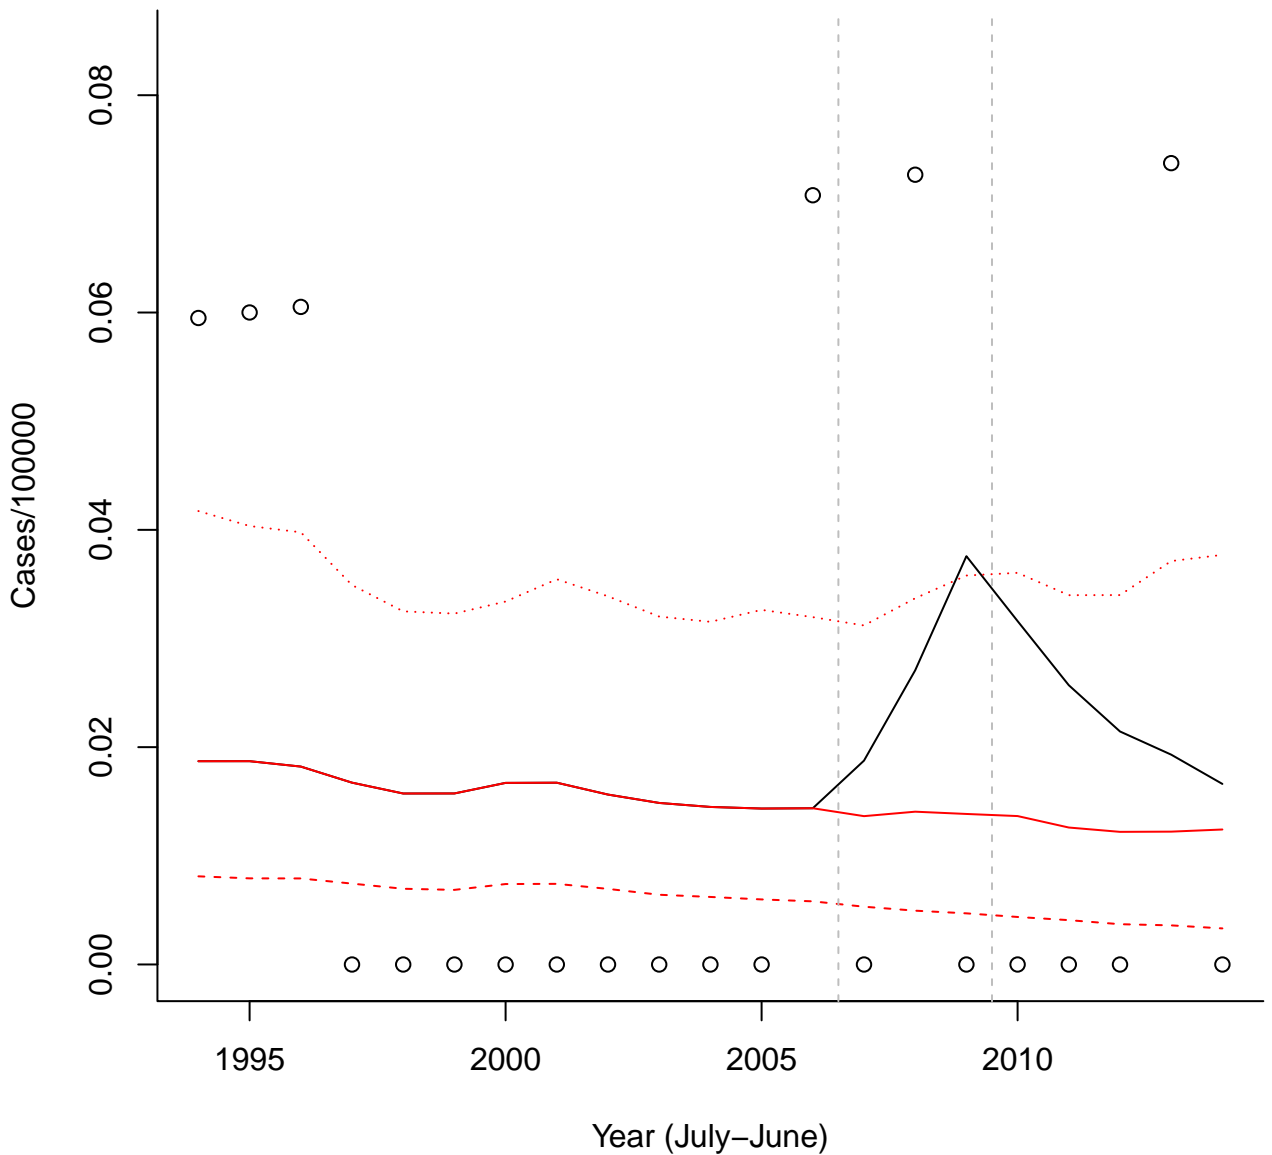

# 18–39y Without comorbidity Serotype 16F

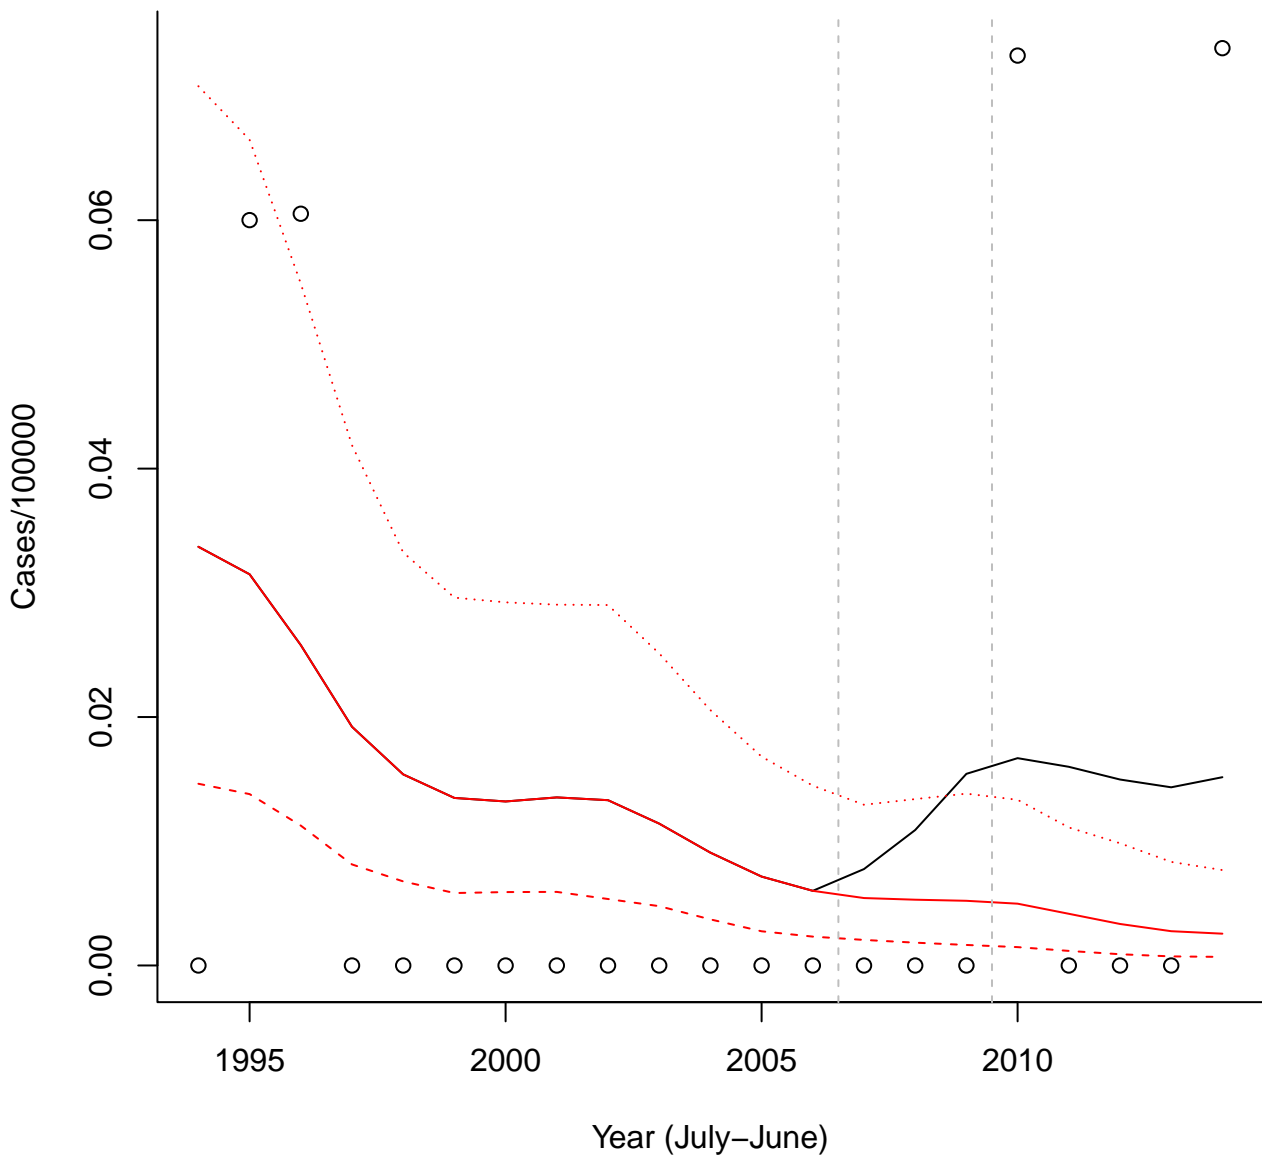



# 18–39y Without comorbidity Serotype 18C

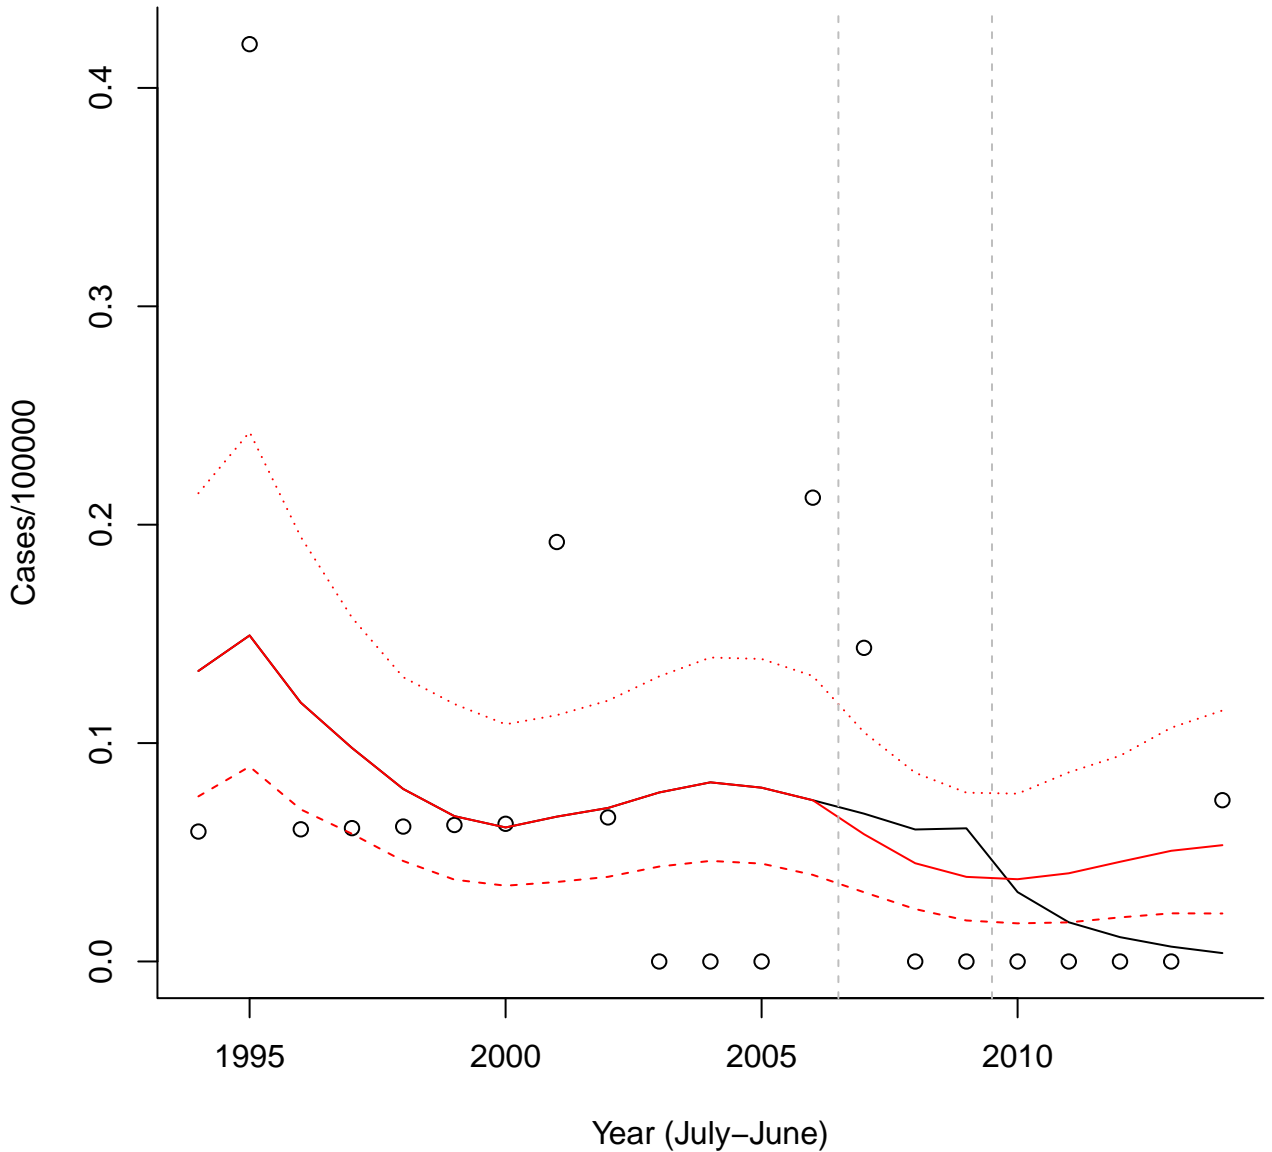

# 18–39y Without comorbidity Serotype 19A

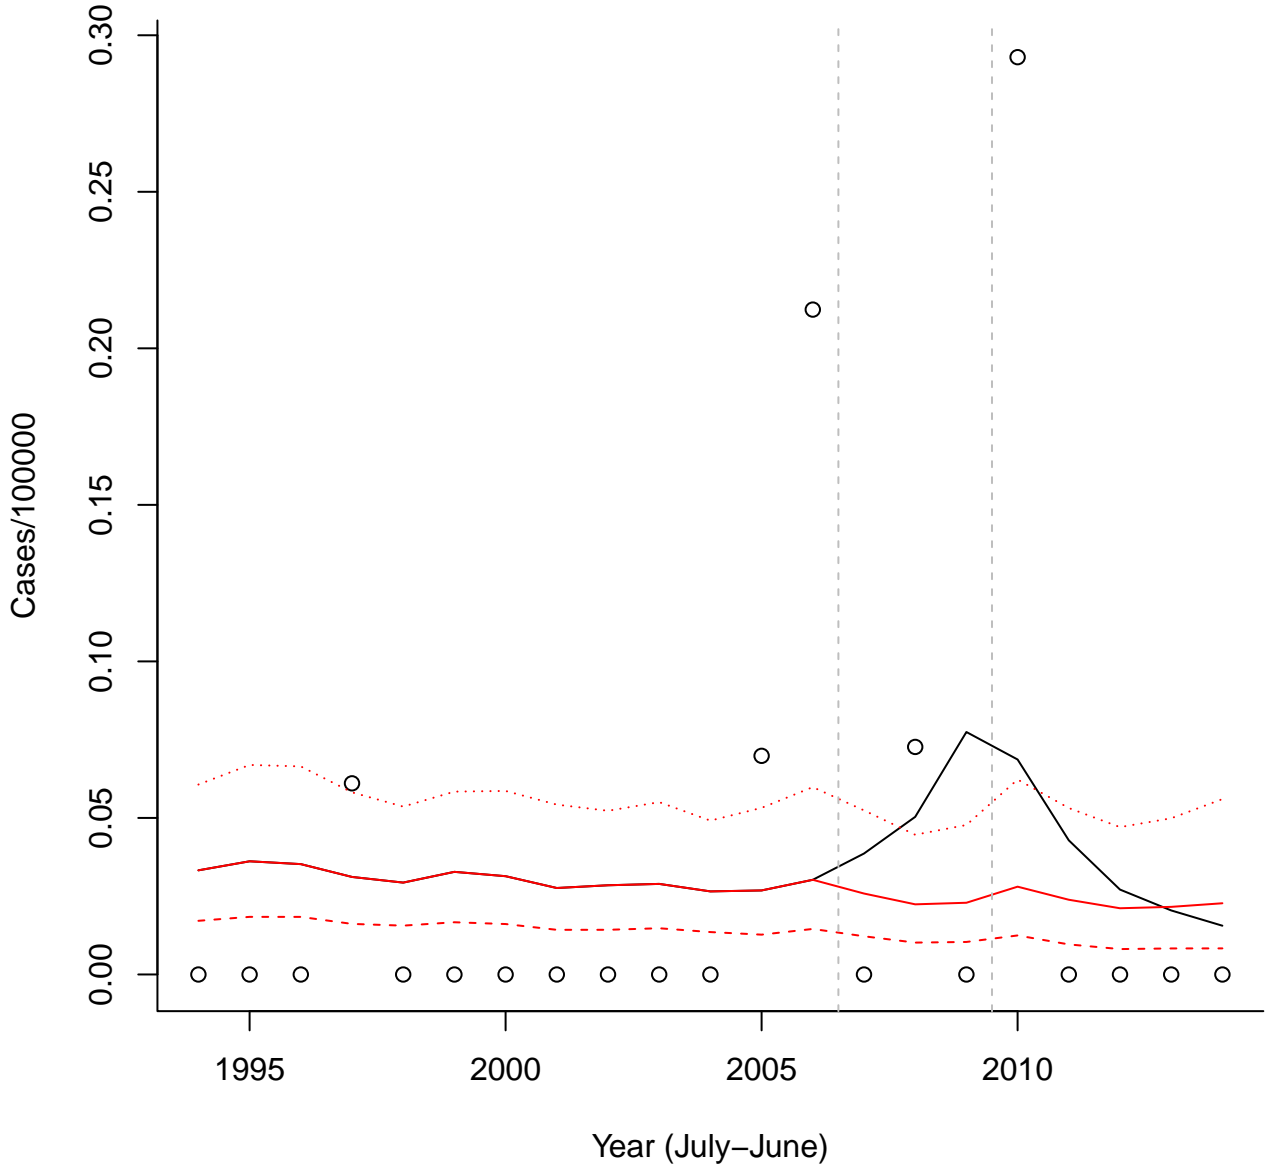

# 18–39y Without comorbidity Serotype 19F

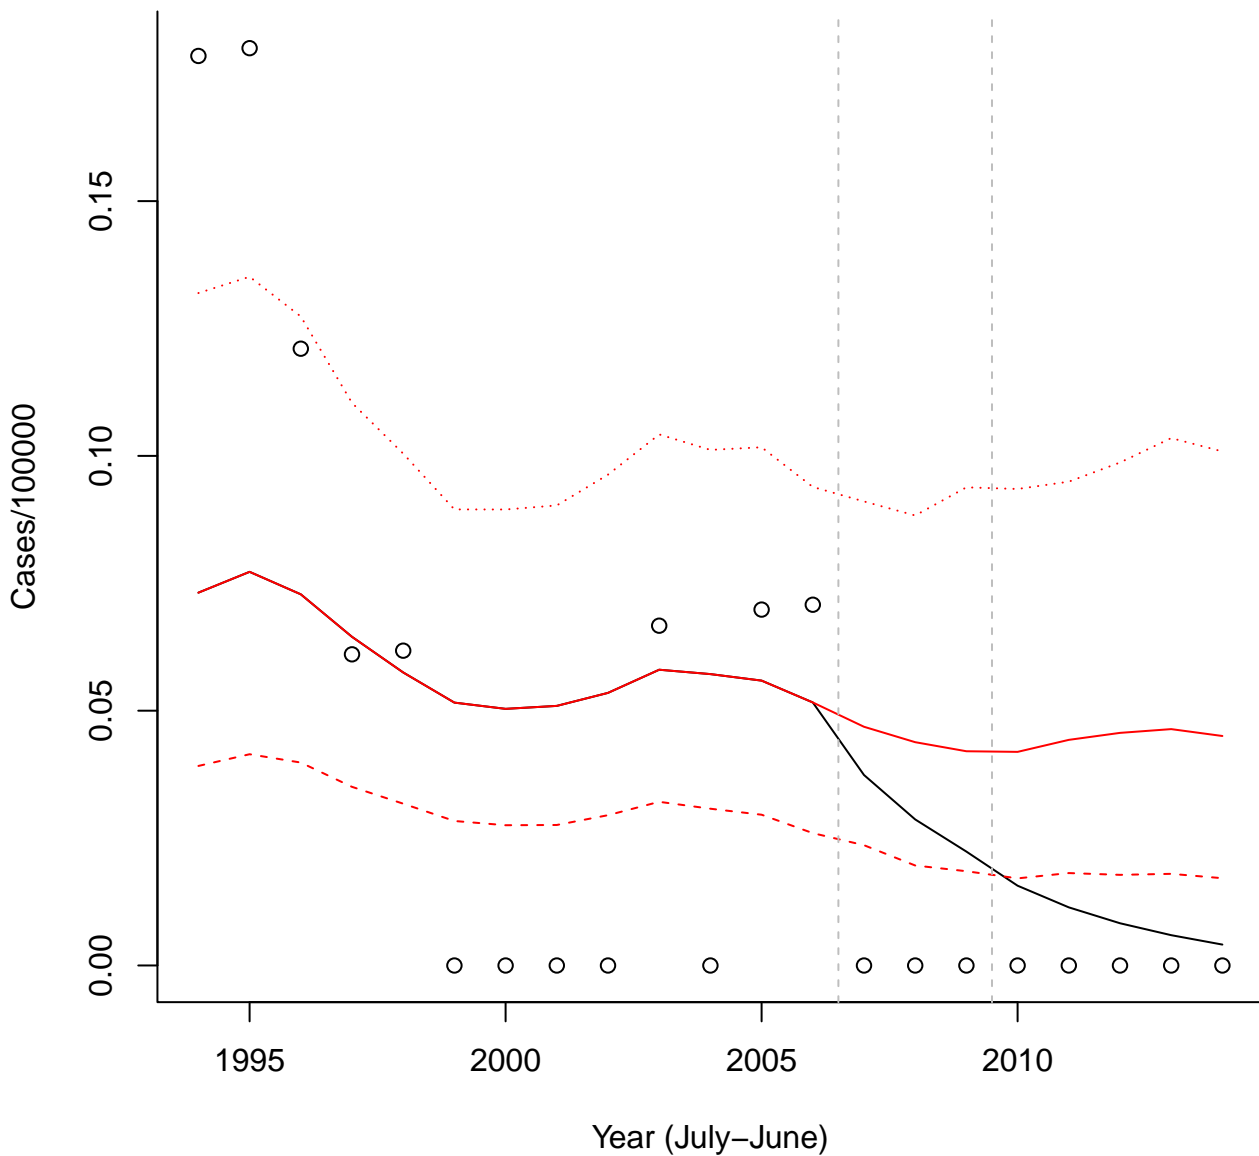

# 18–39y Without comorbidity Serotype 2

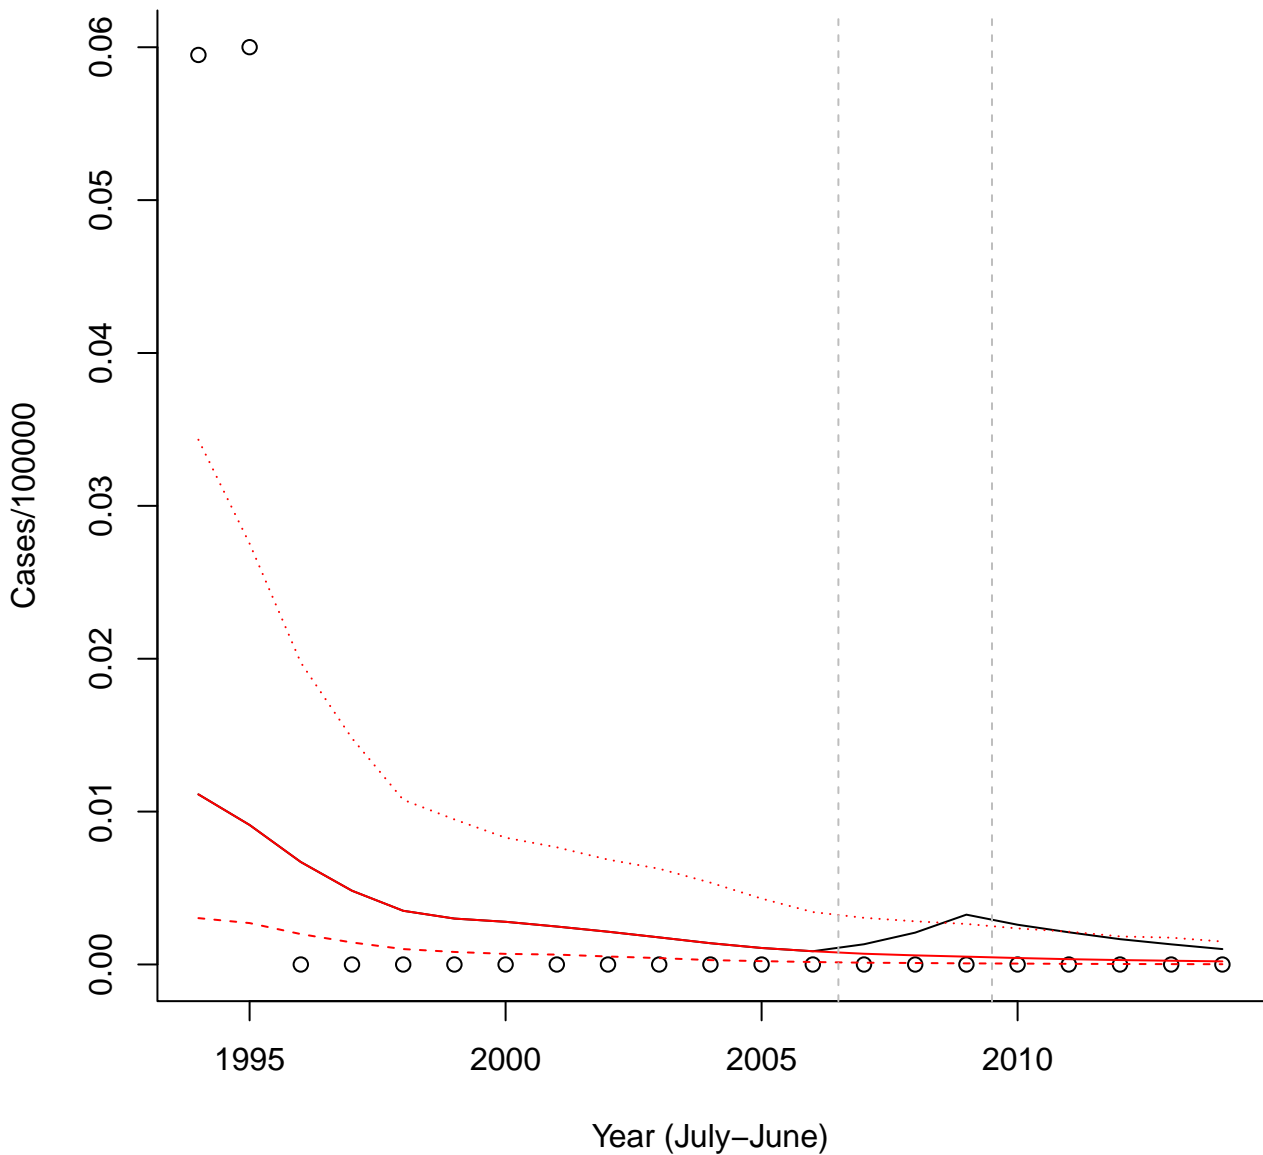

# 18–39y Without comorbidity Serotype 20

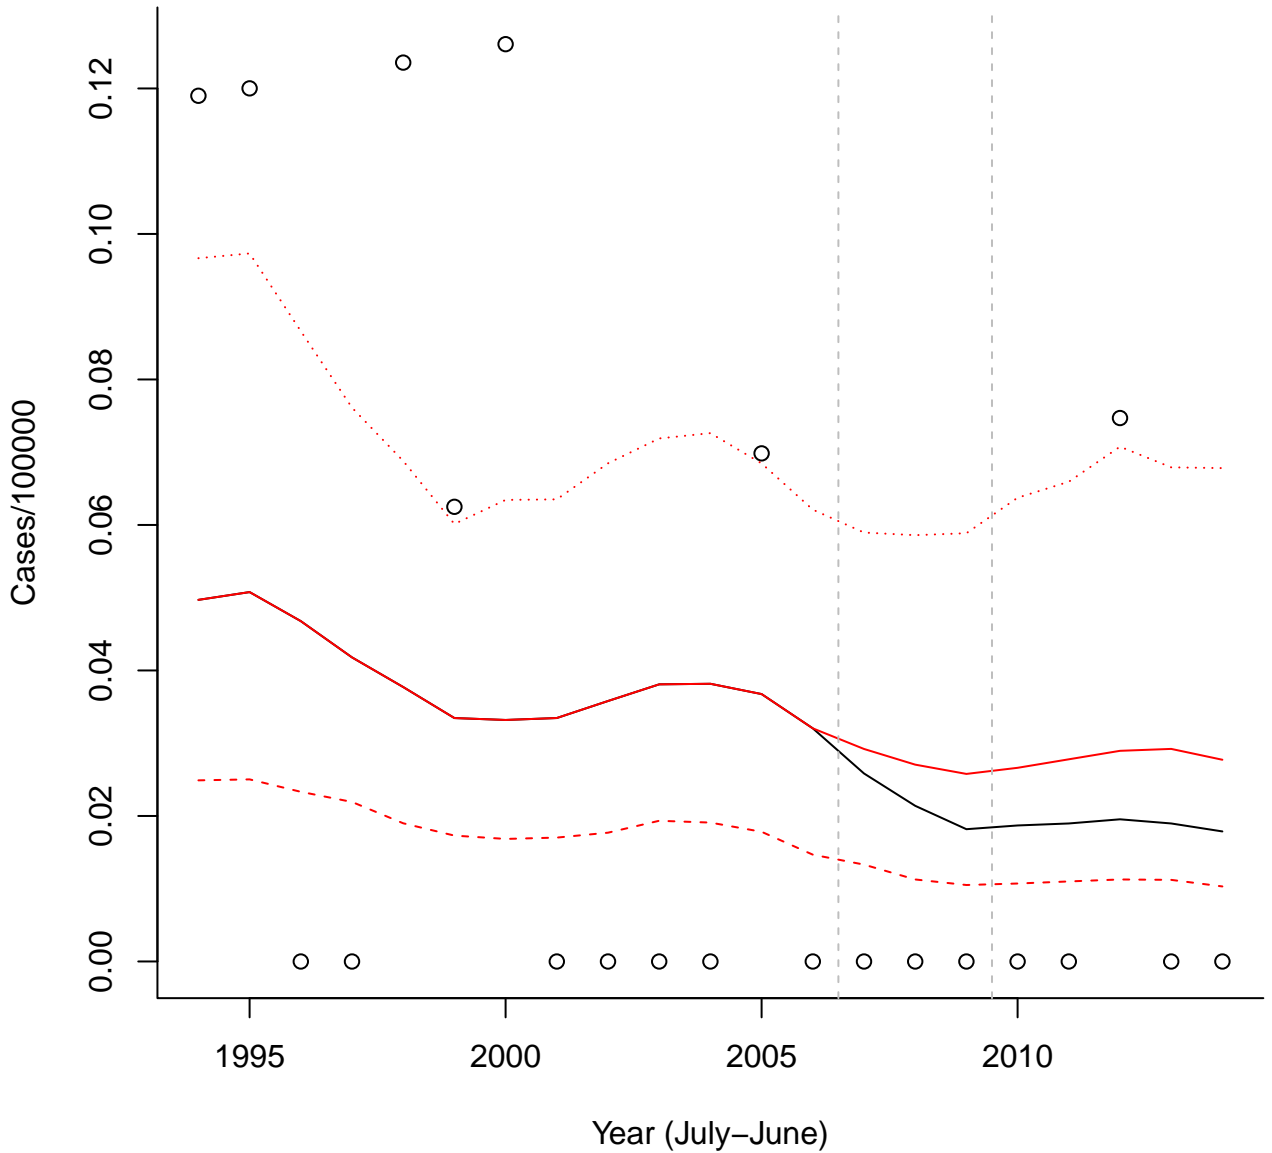

# 18–39y Without comorbidity Serotype 21

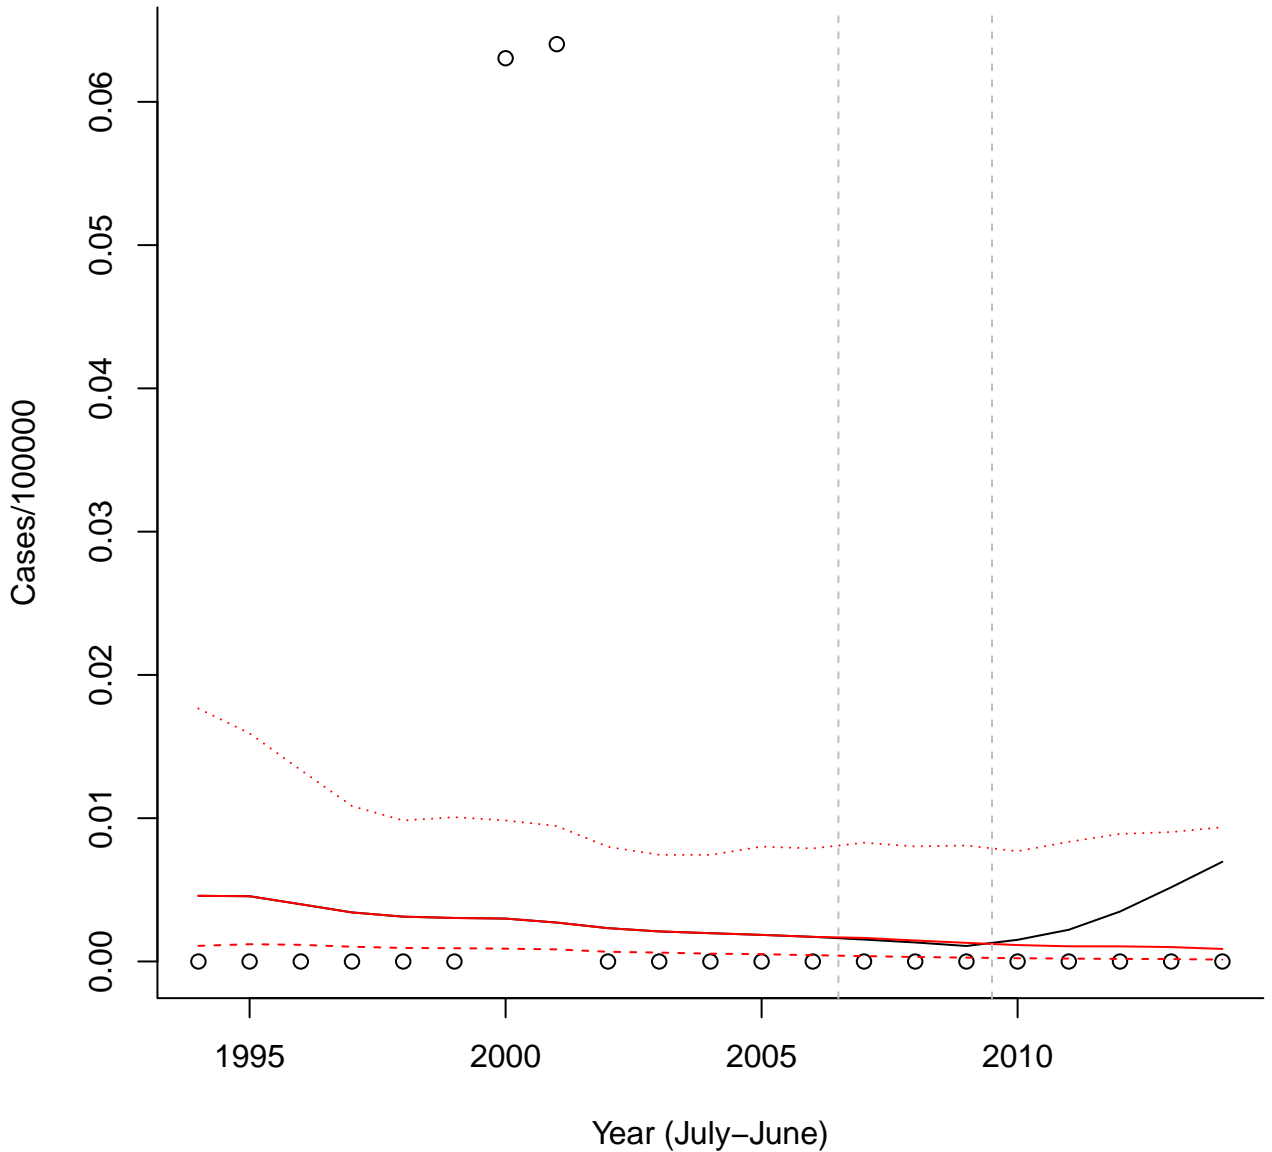

# 18-39y Without comorbidity Serotype 22F

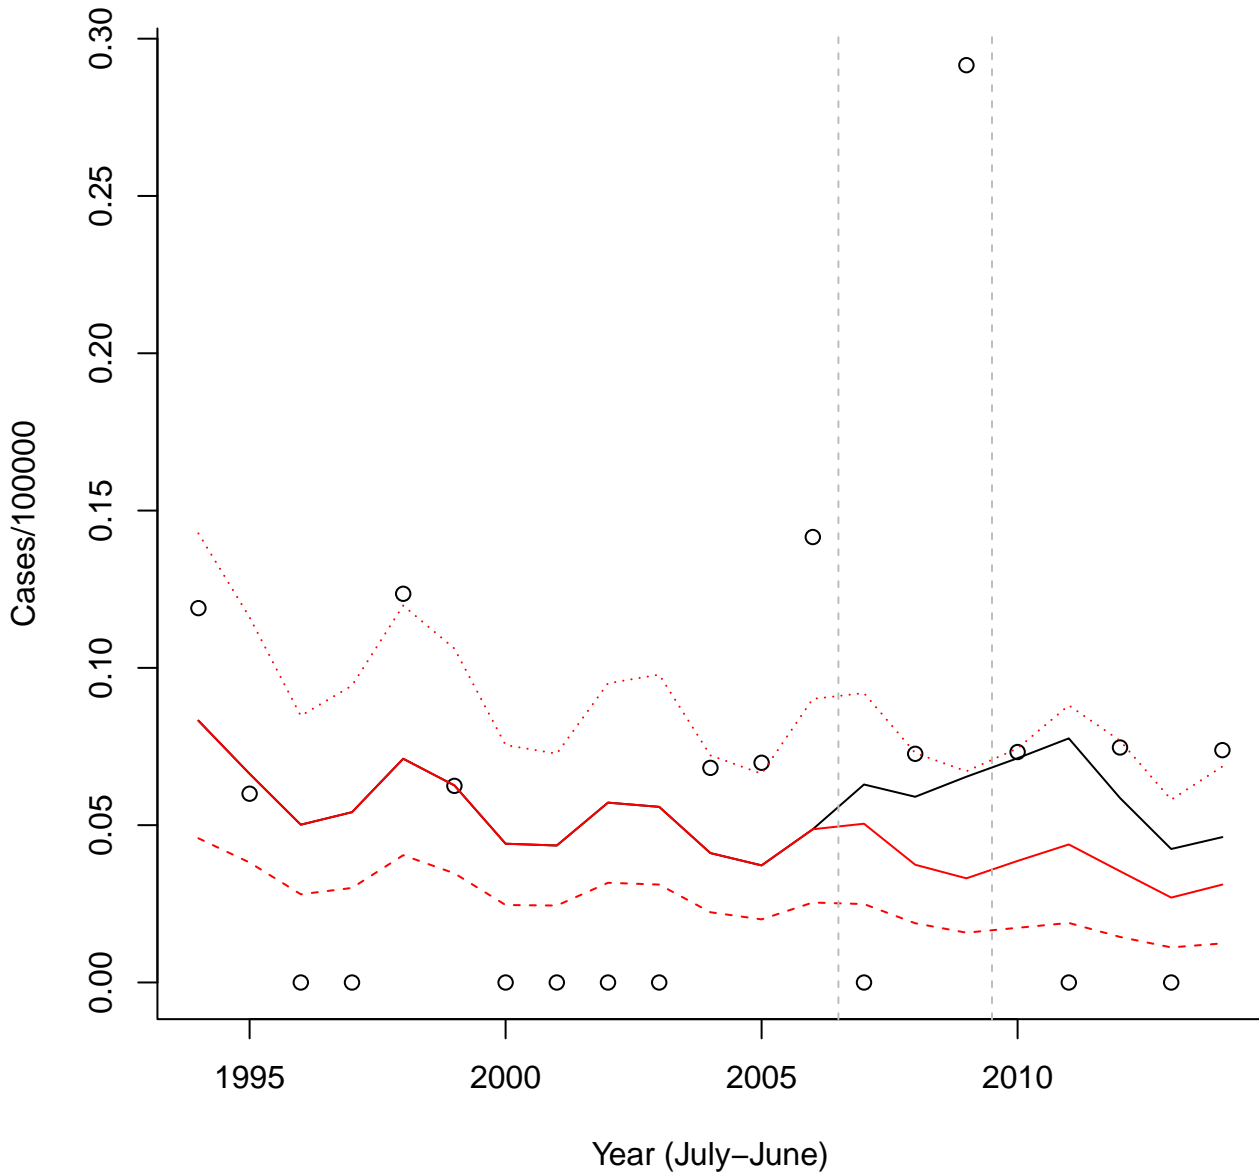

# 18-39y Without comorbidity Serotype 23A

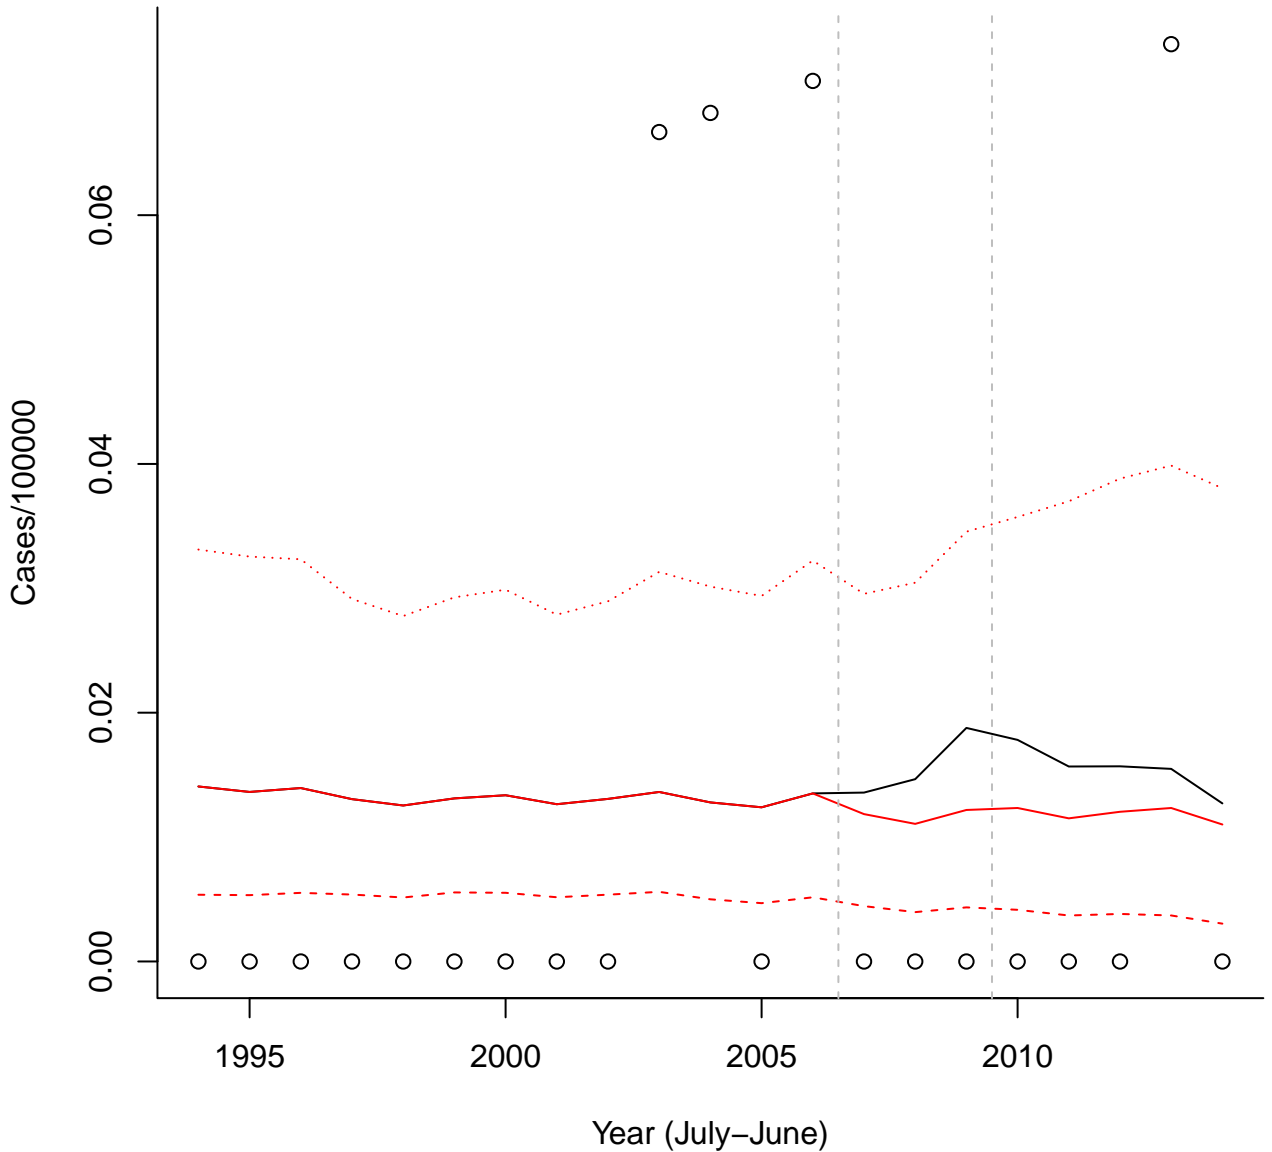



# 18–39y Without comorbidity Serotype 23B

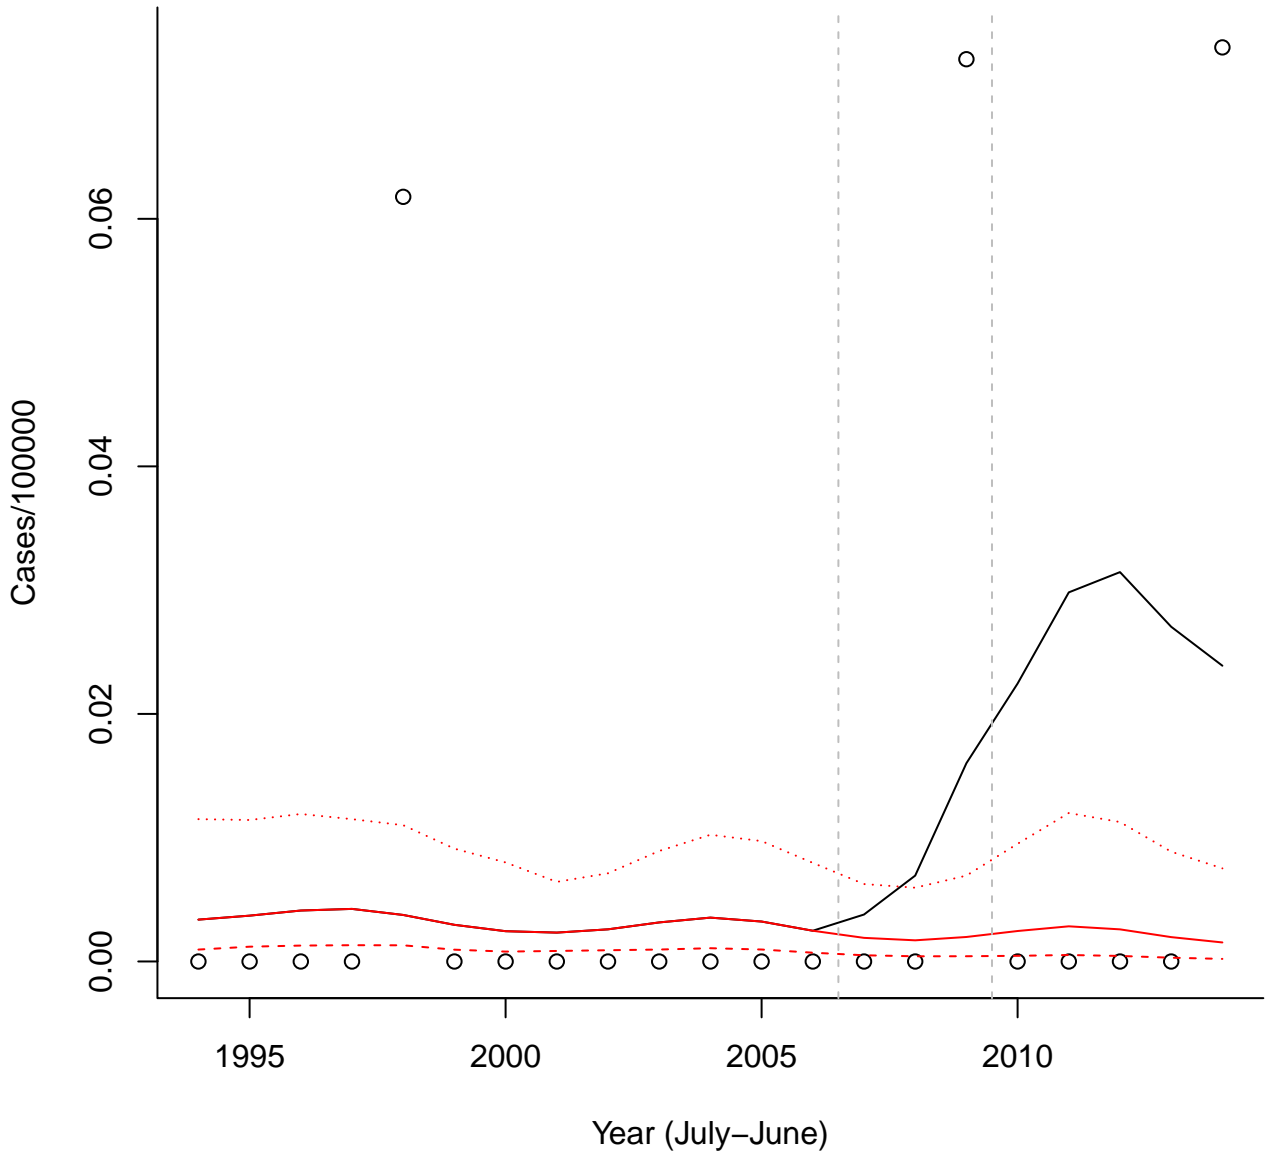

# 18-39y Without comorbidity Serotype 23F

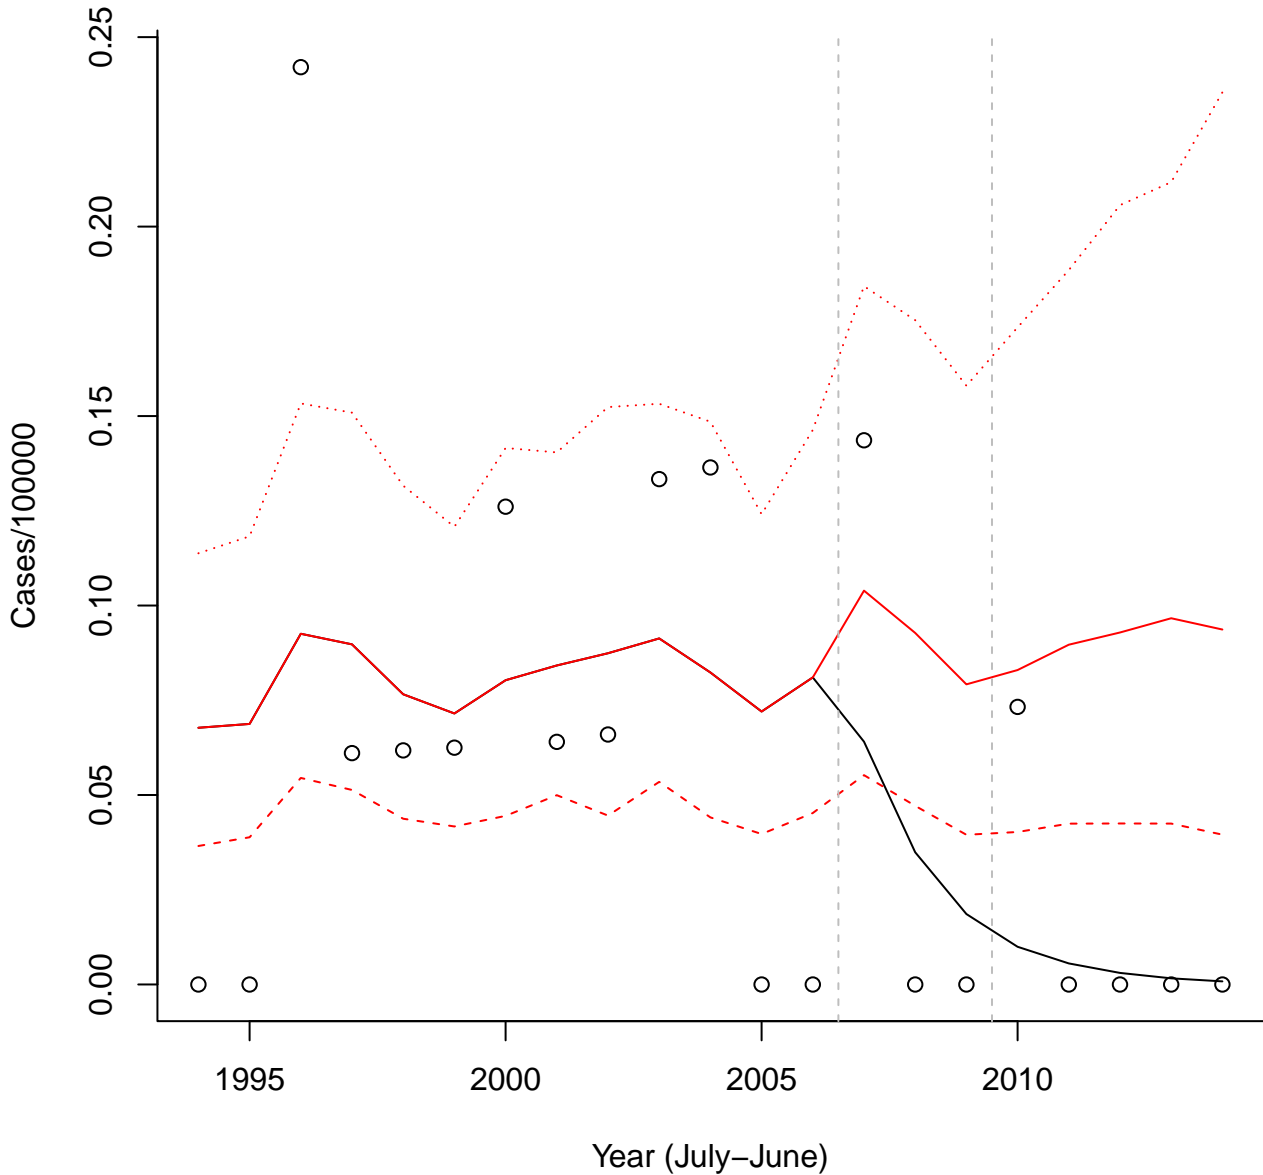

# 18-39y Without comorbidity Serotype 24F

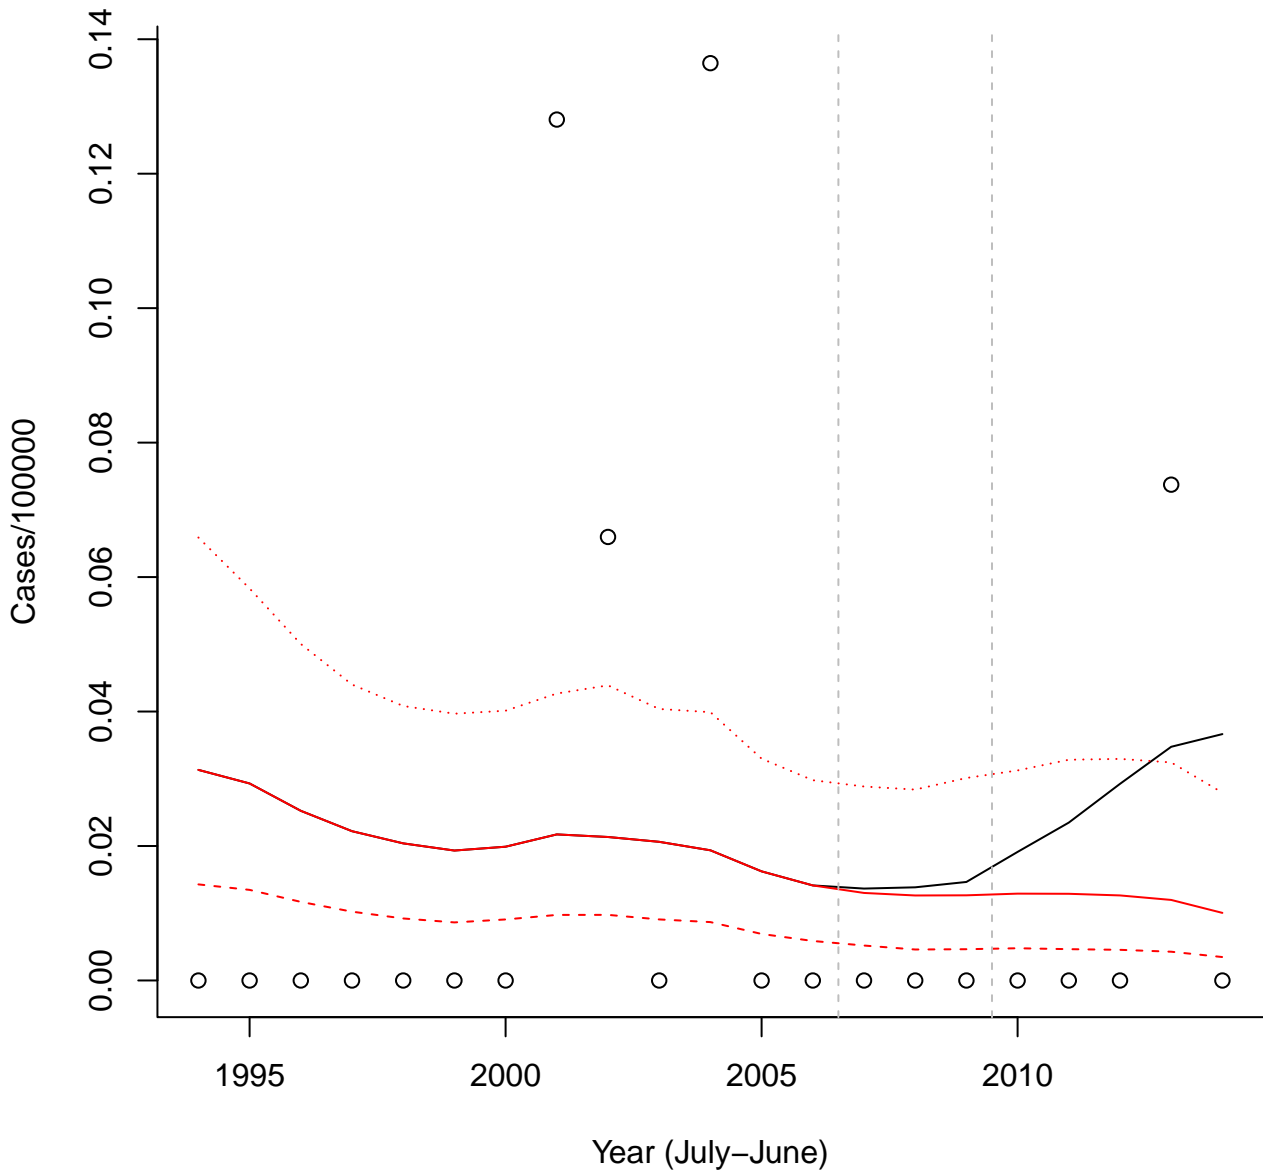

# 18–39y Without comorbidity Serotype 3

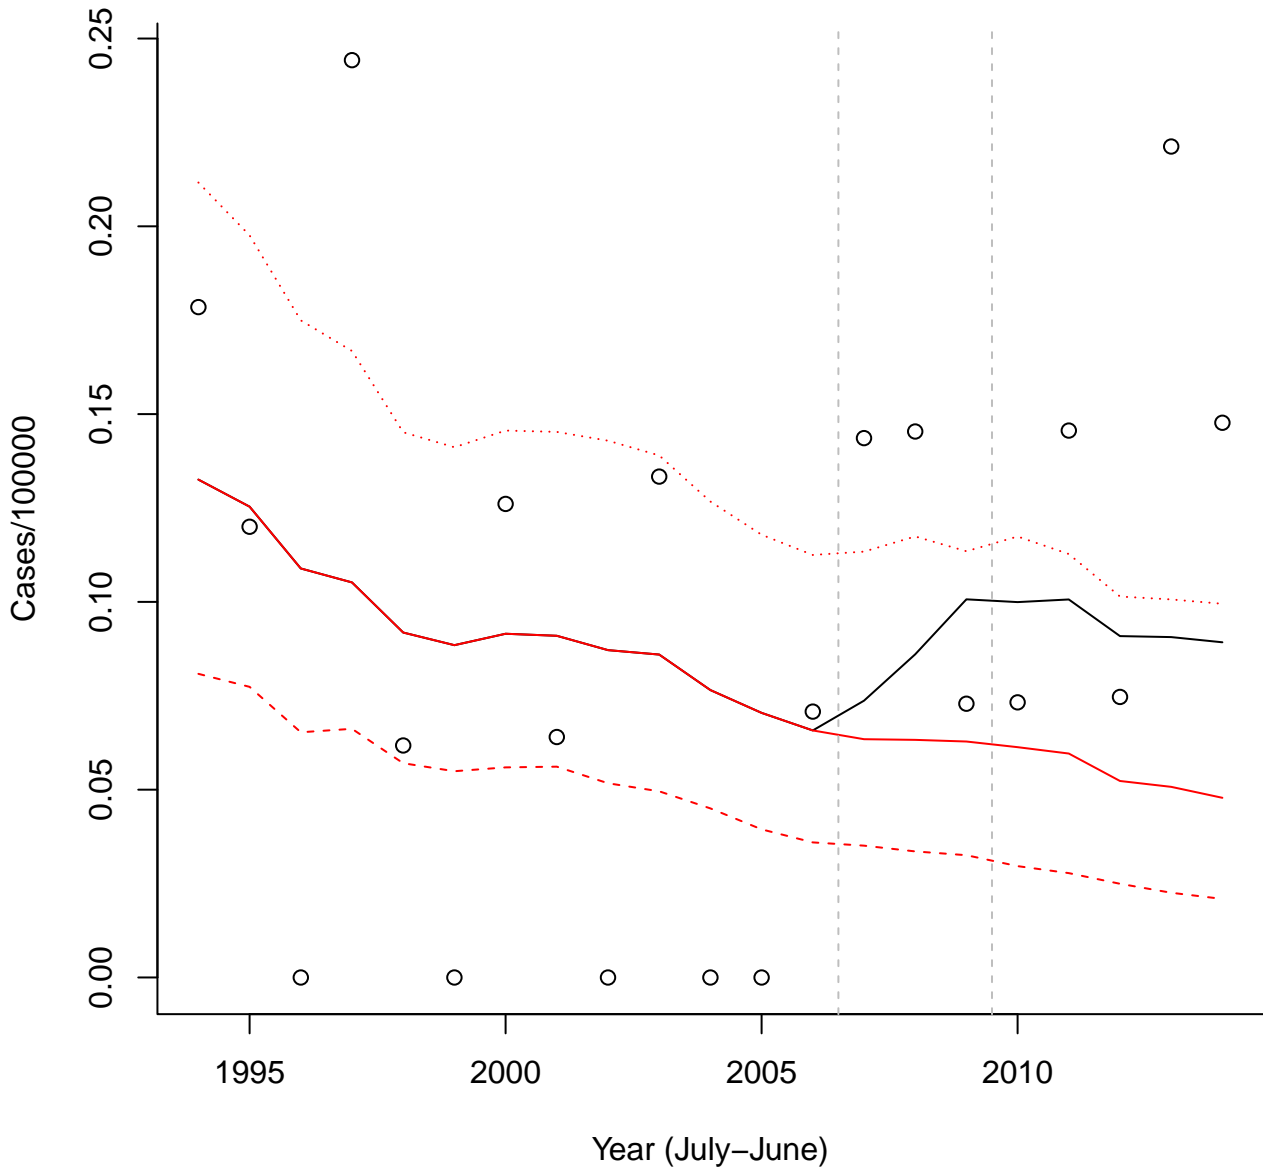

# 18–39y Without comorbidity Serotype 31

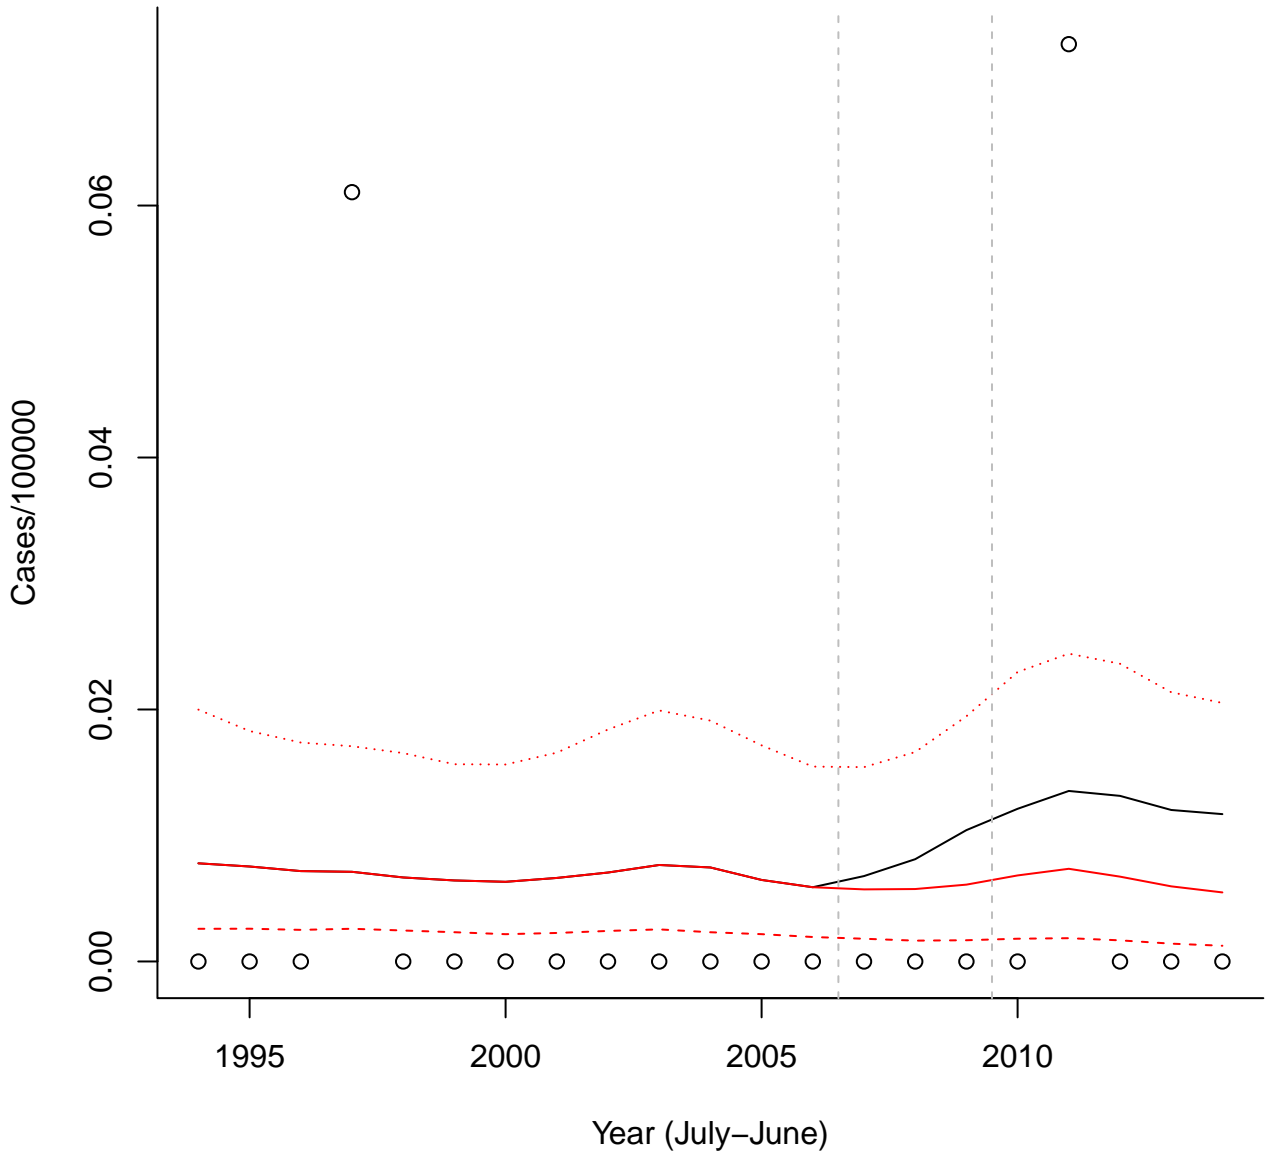

# 18-39y Without comorbidity Serotype 33F

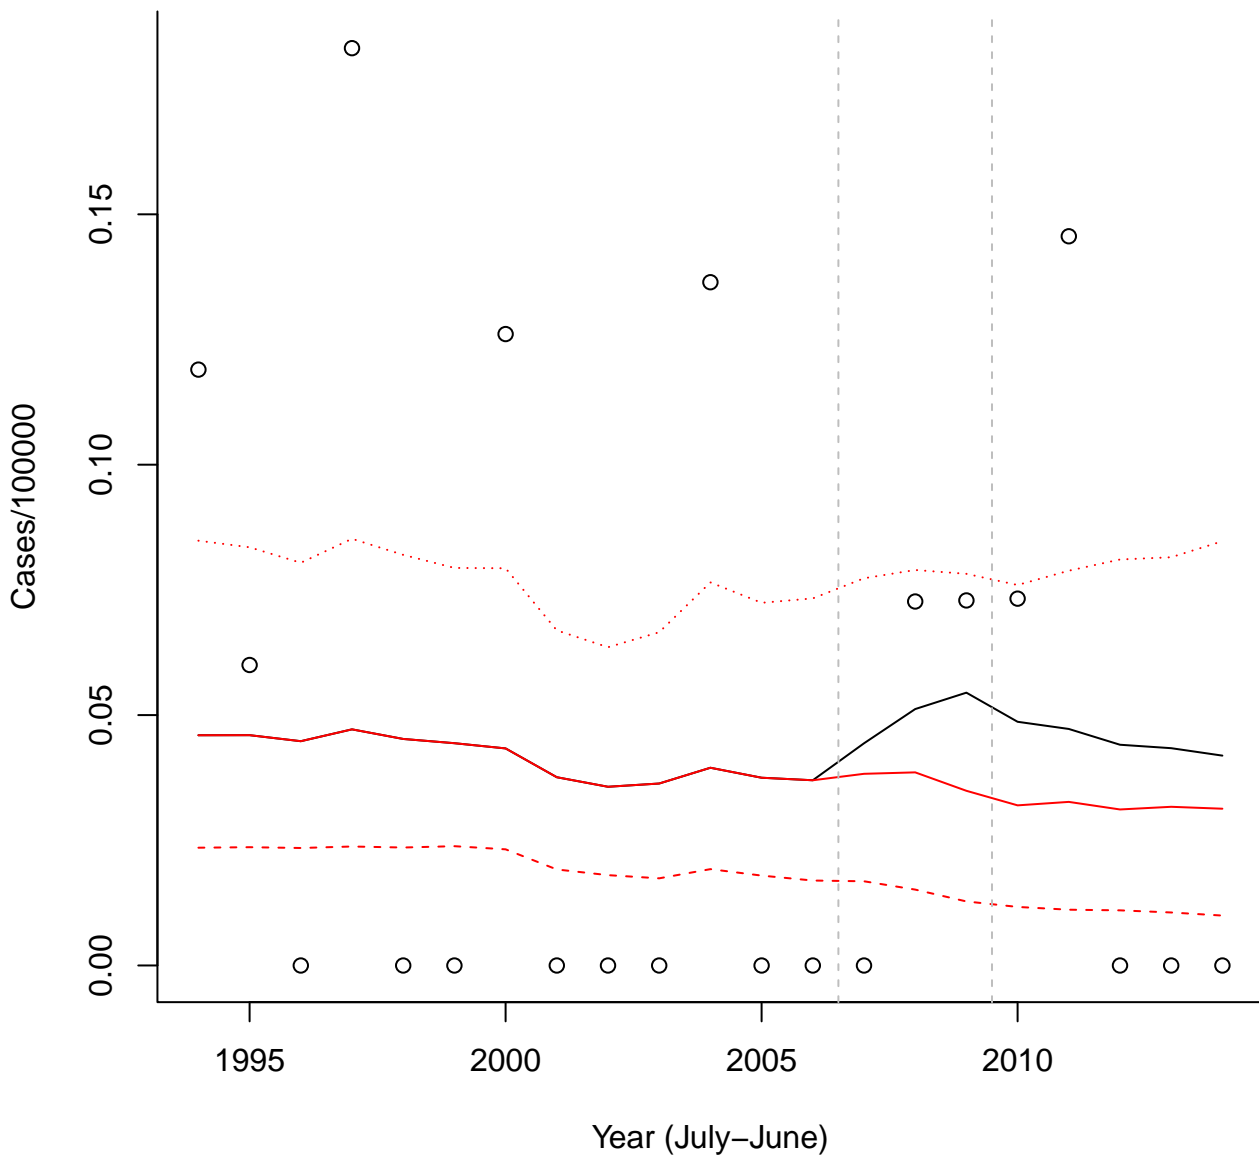

# 18–39y Without comorbidity Serotype 34

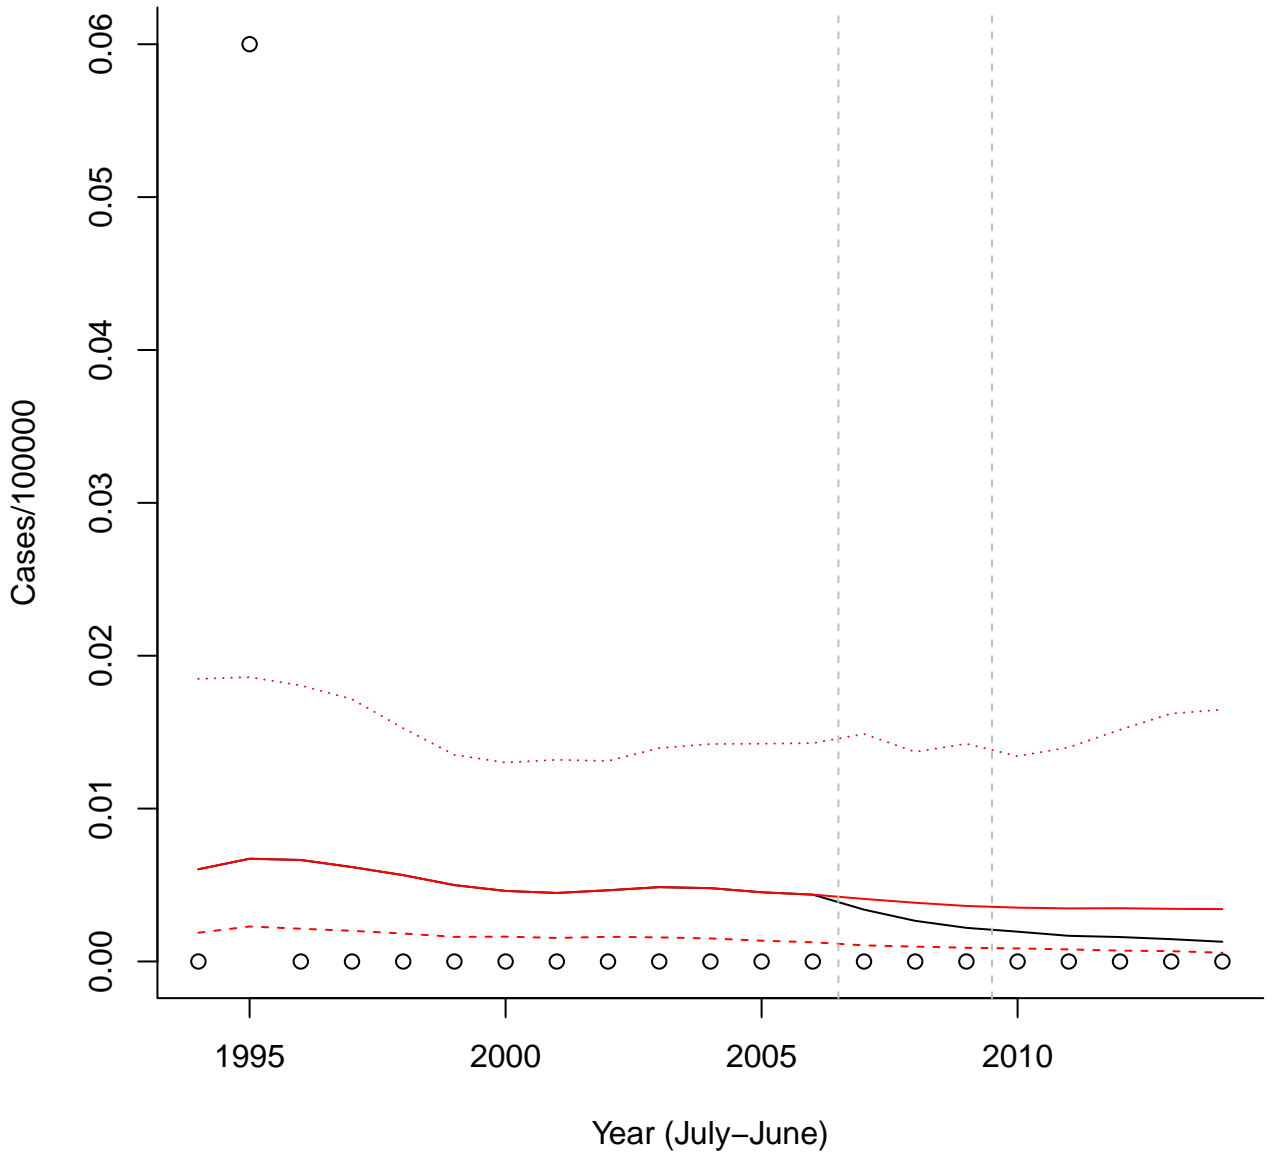

# 18-39y Without comorbidity Serotype 35F

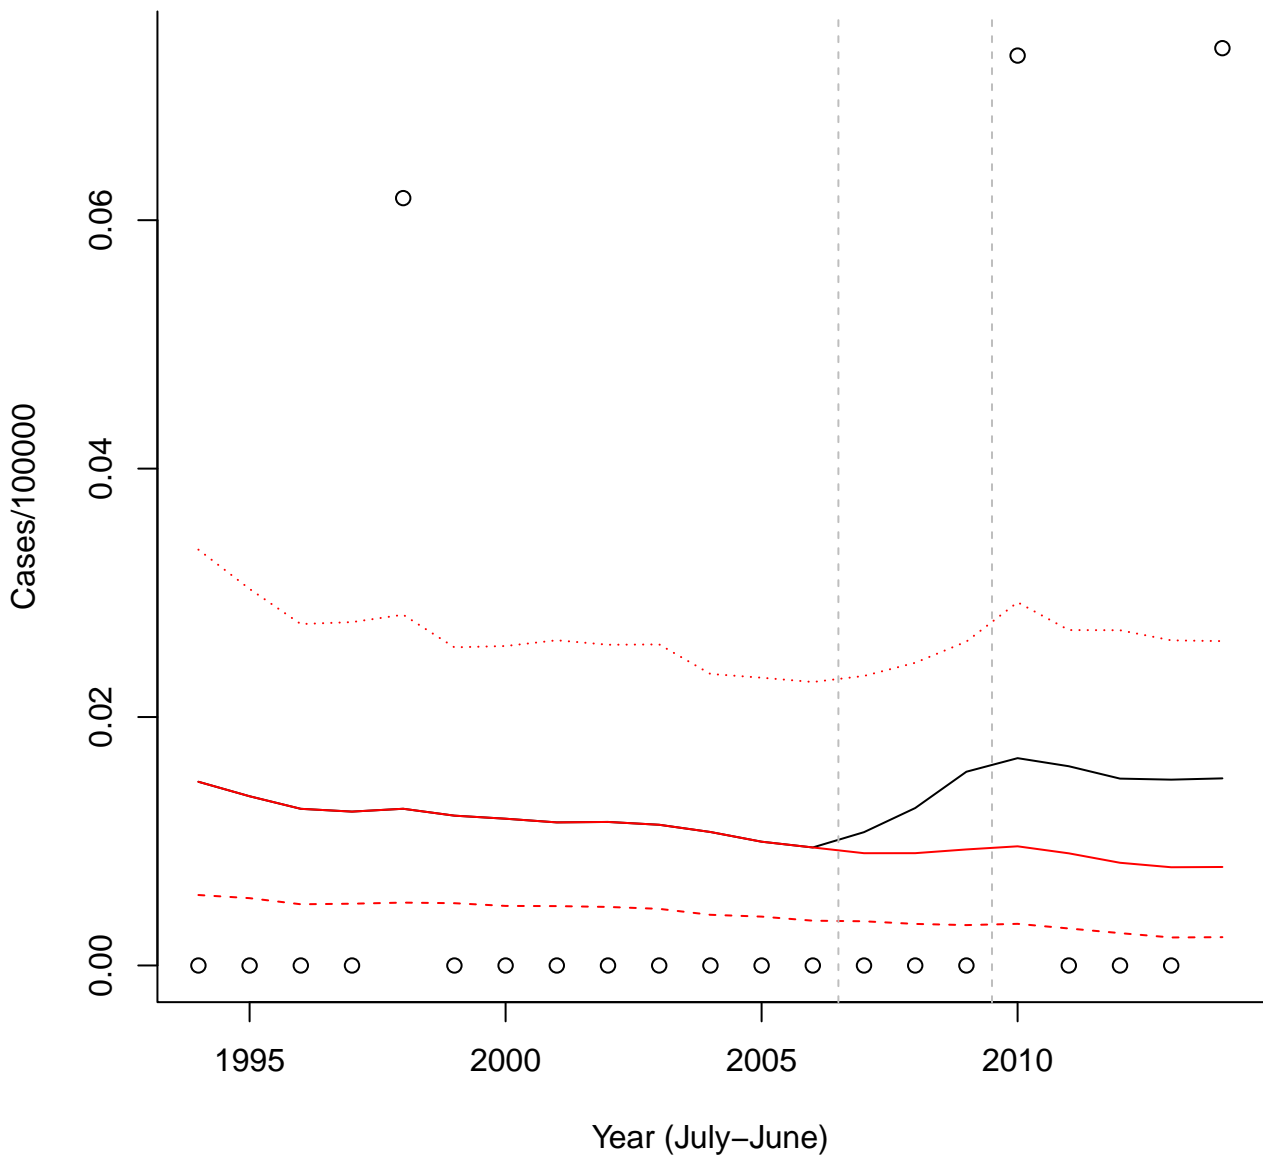



# 18–39y Without comorbidity Serotype 37

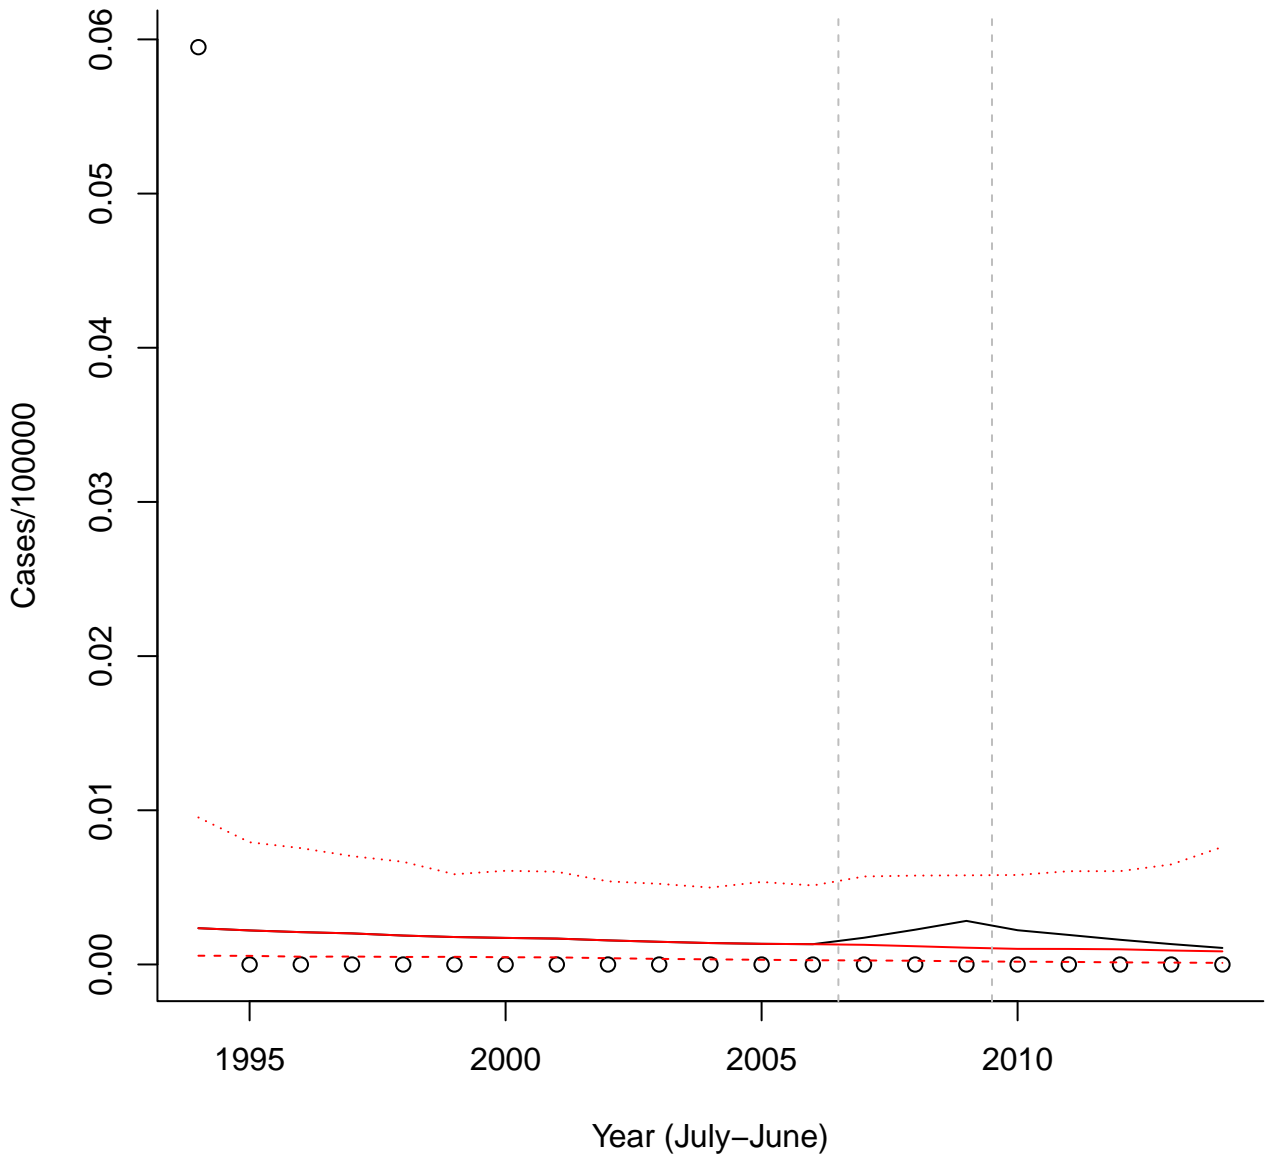

# 18-39y Without comorbidity Serotype 38

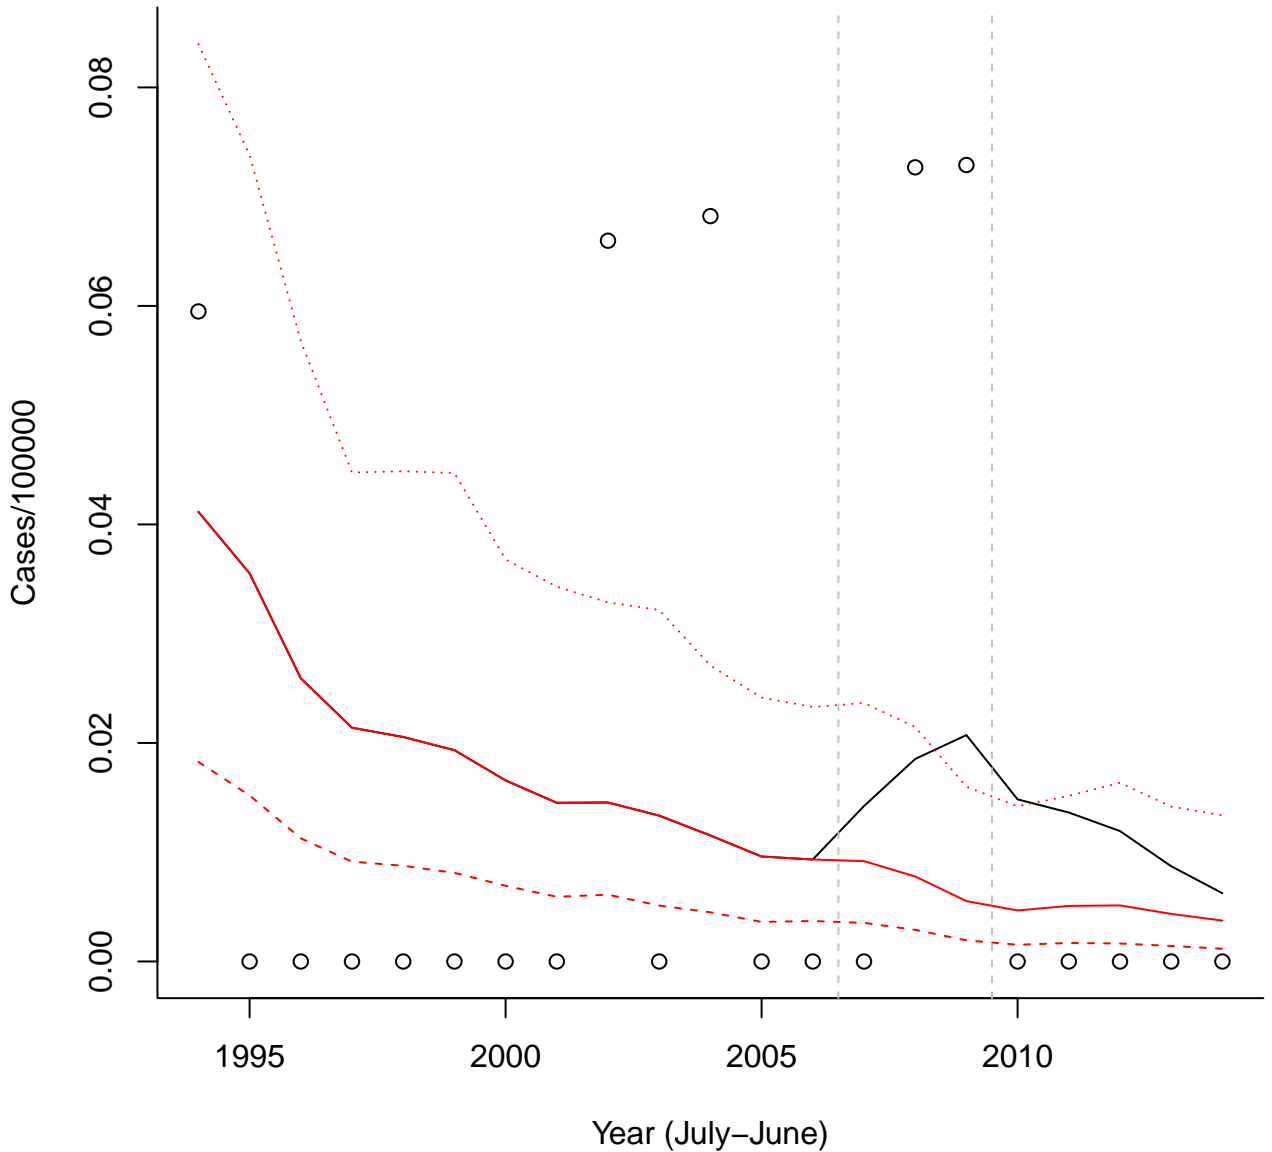

# 18–39y Without comorbidity Serotype 4

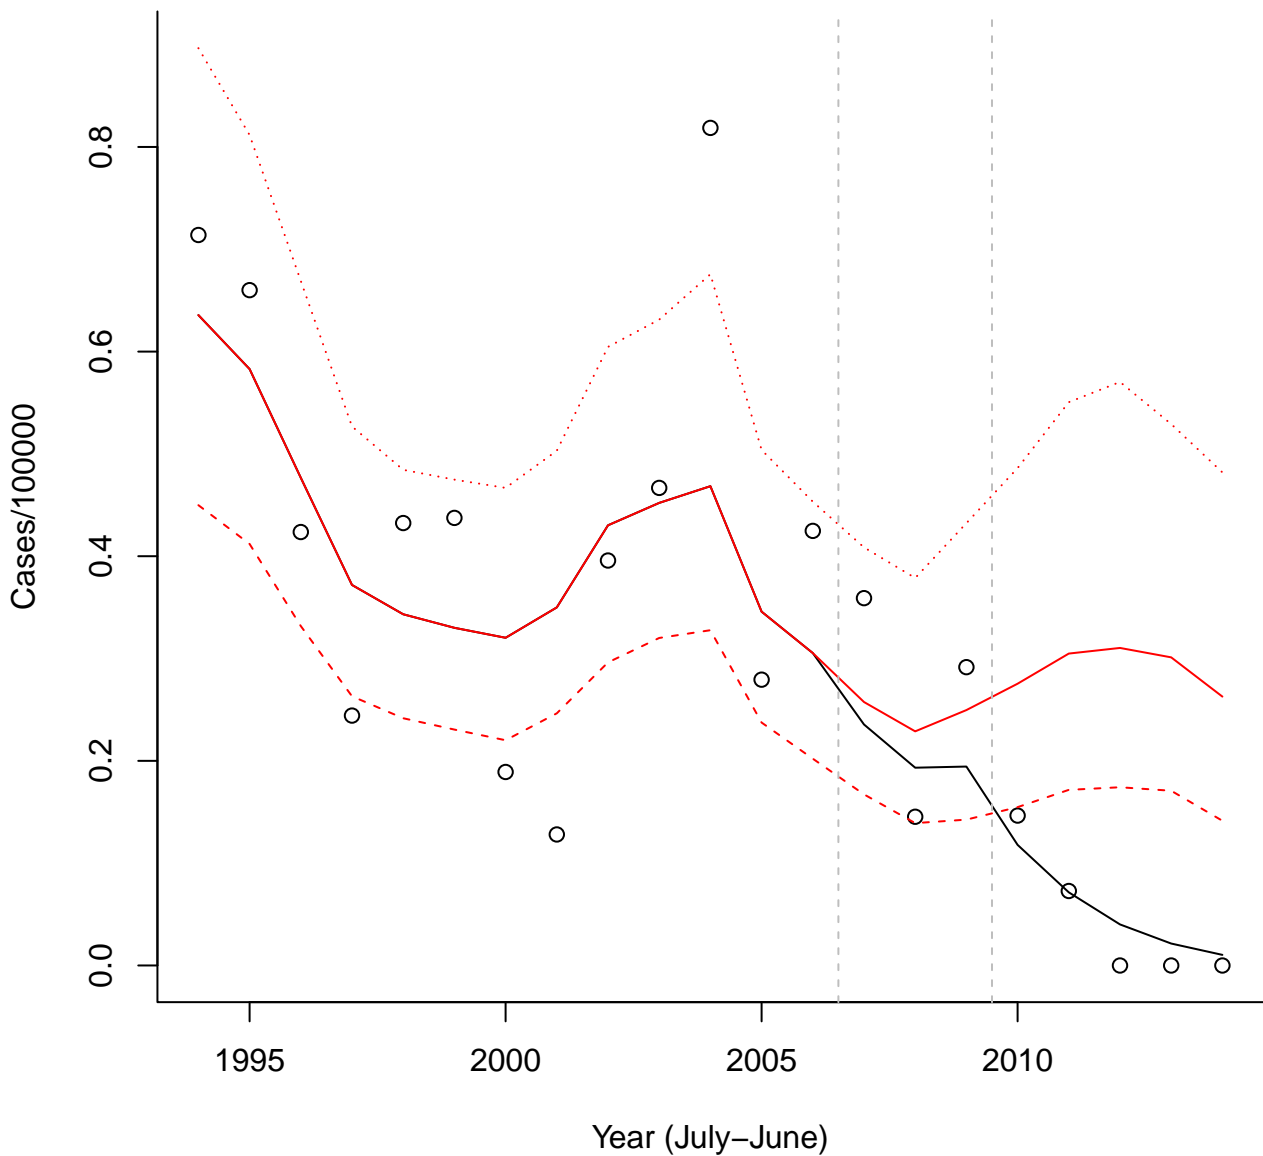

# 18-39y Without comorbidity Serotype 42

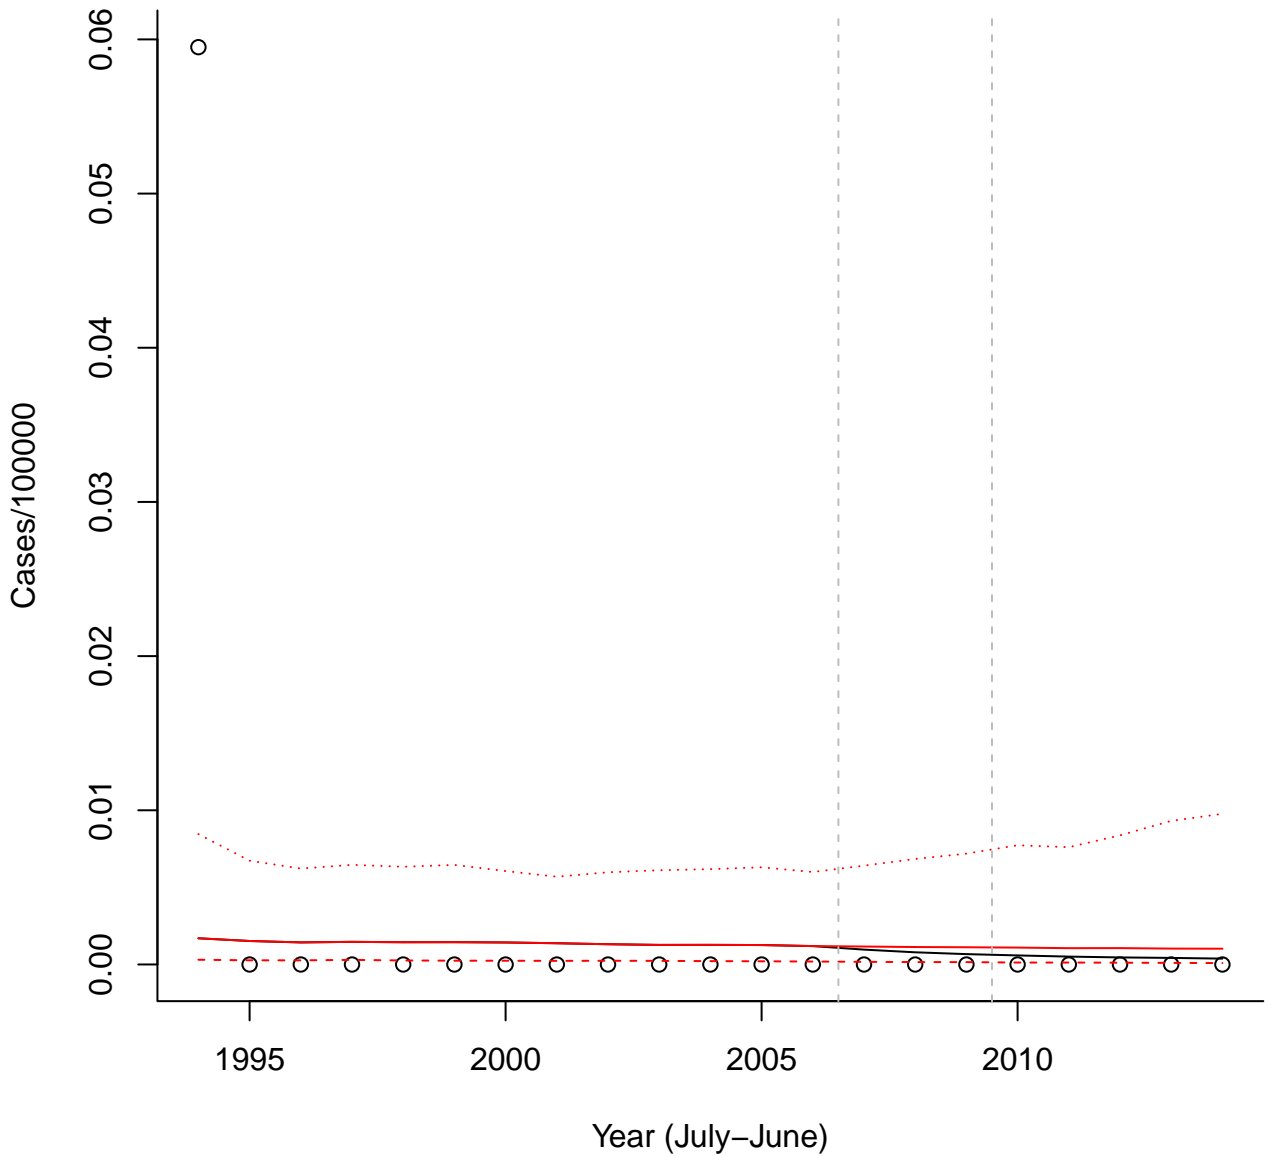

# 18–39y Without comorbidity Serotype 5

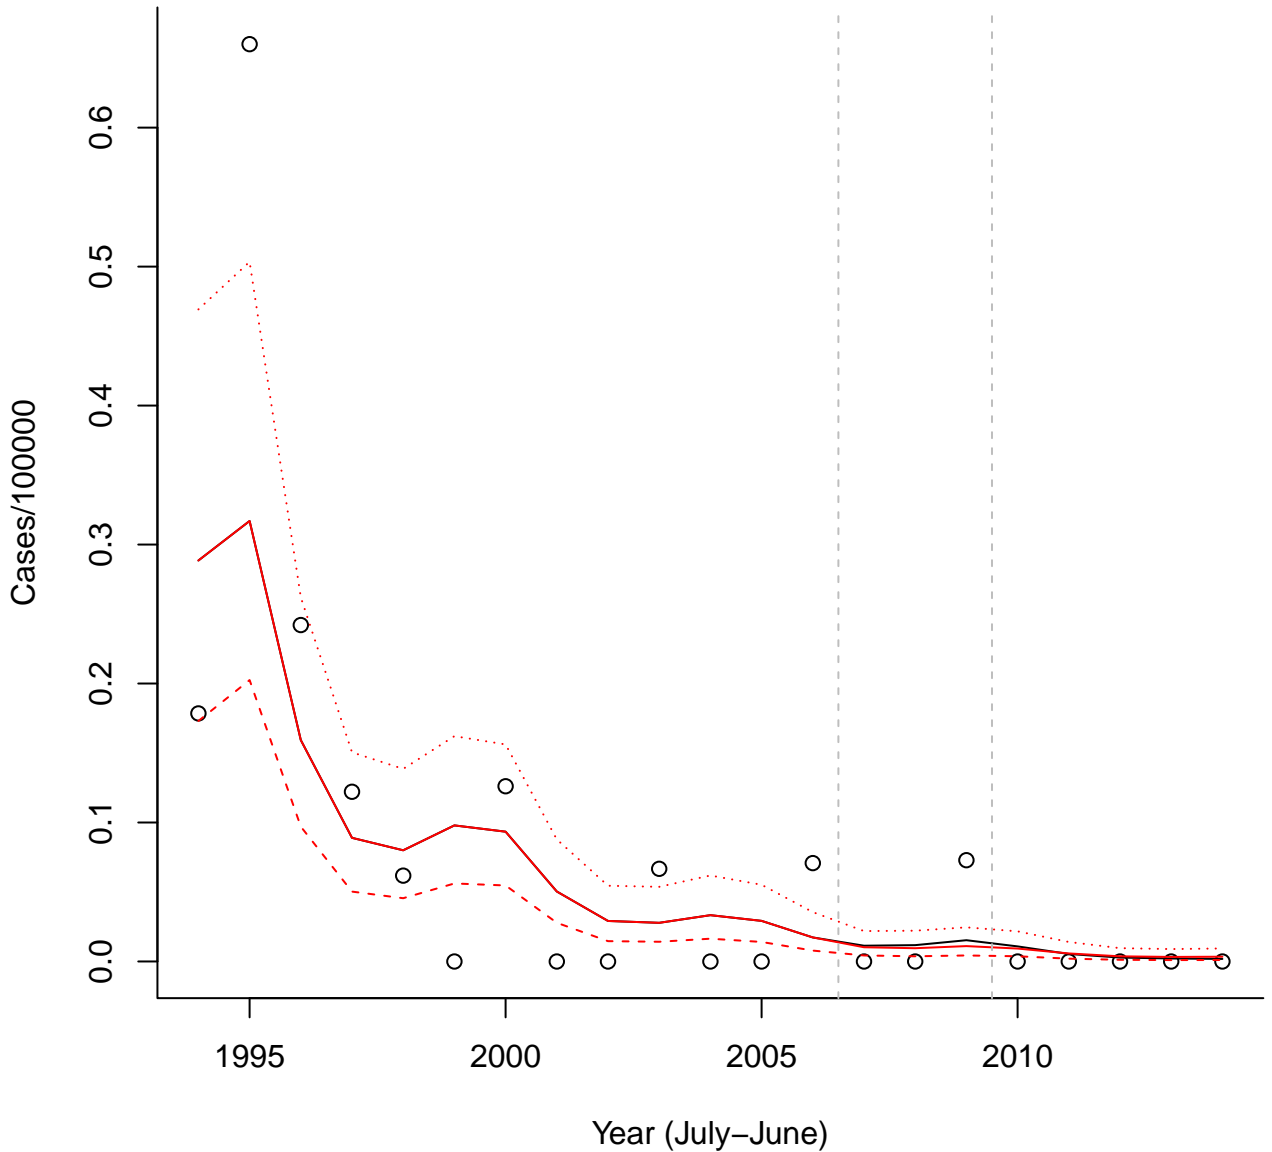

# 18–39y Without comorbidity Serotype 6A

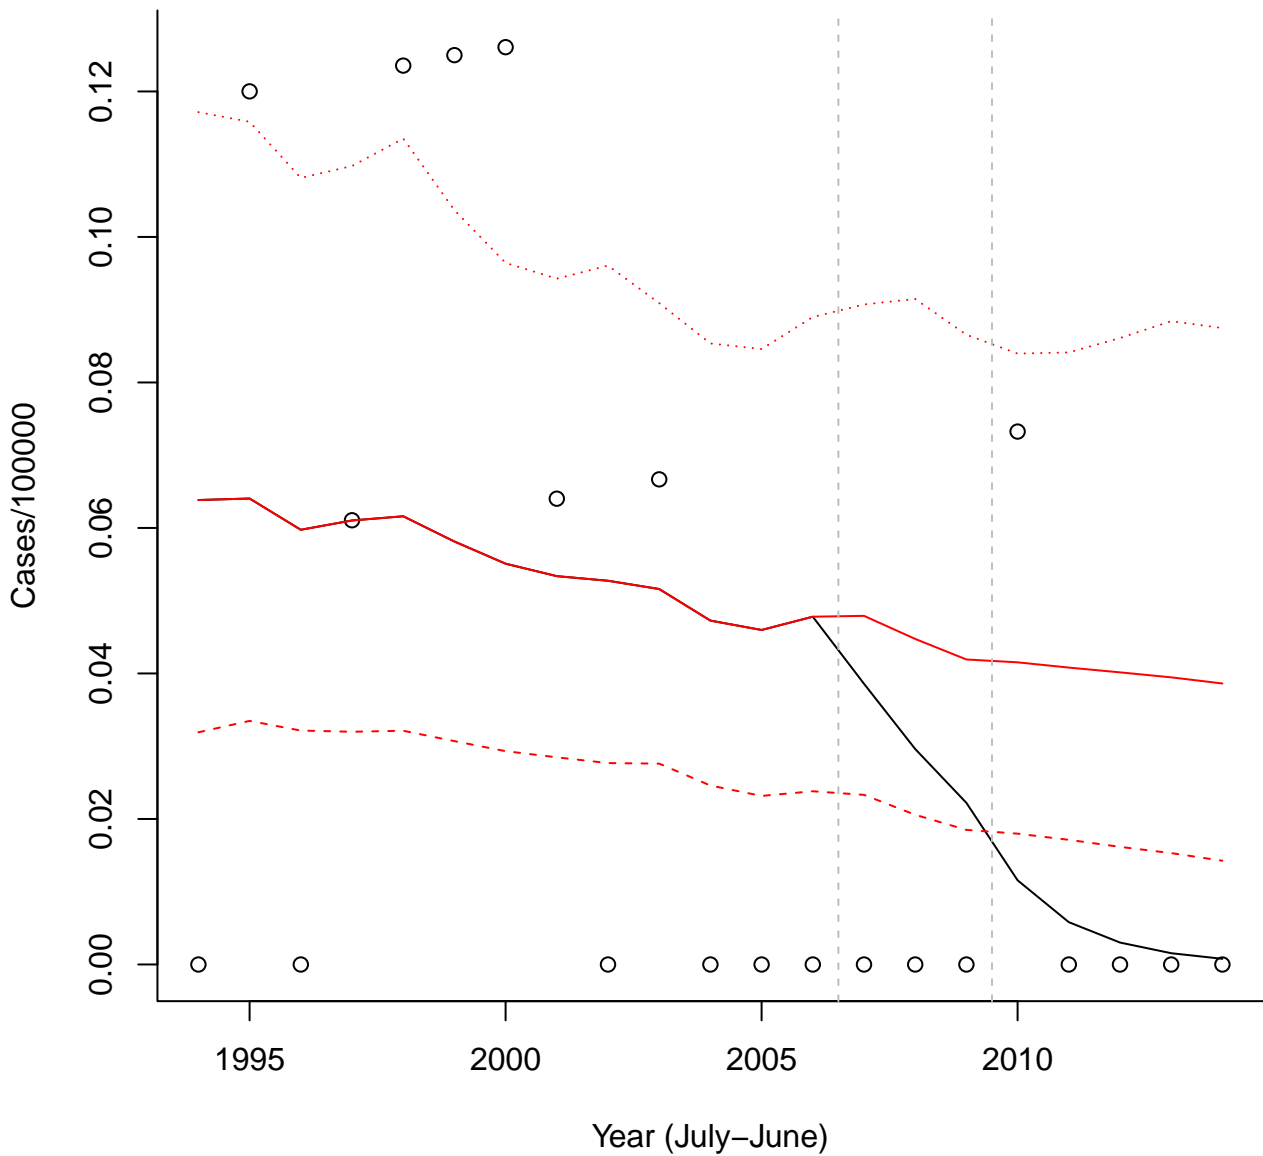

# 18–39y Without comorbidity Serotype 6B

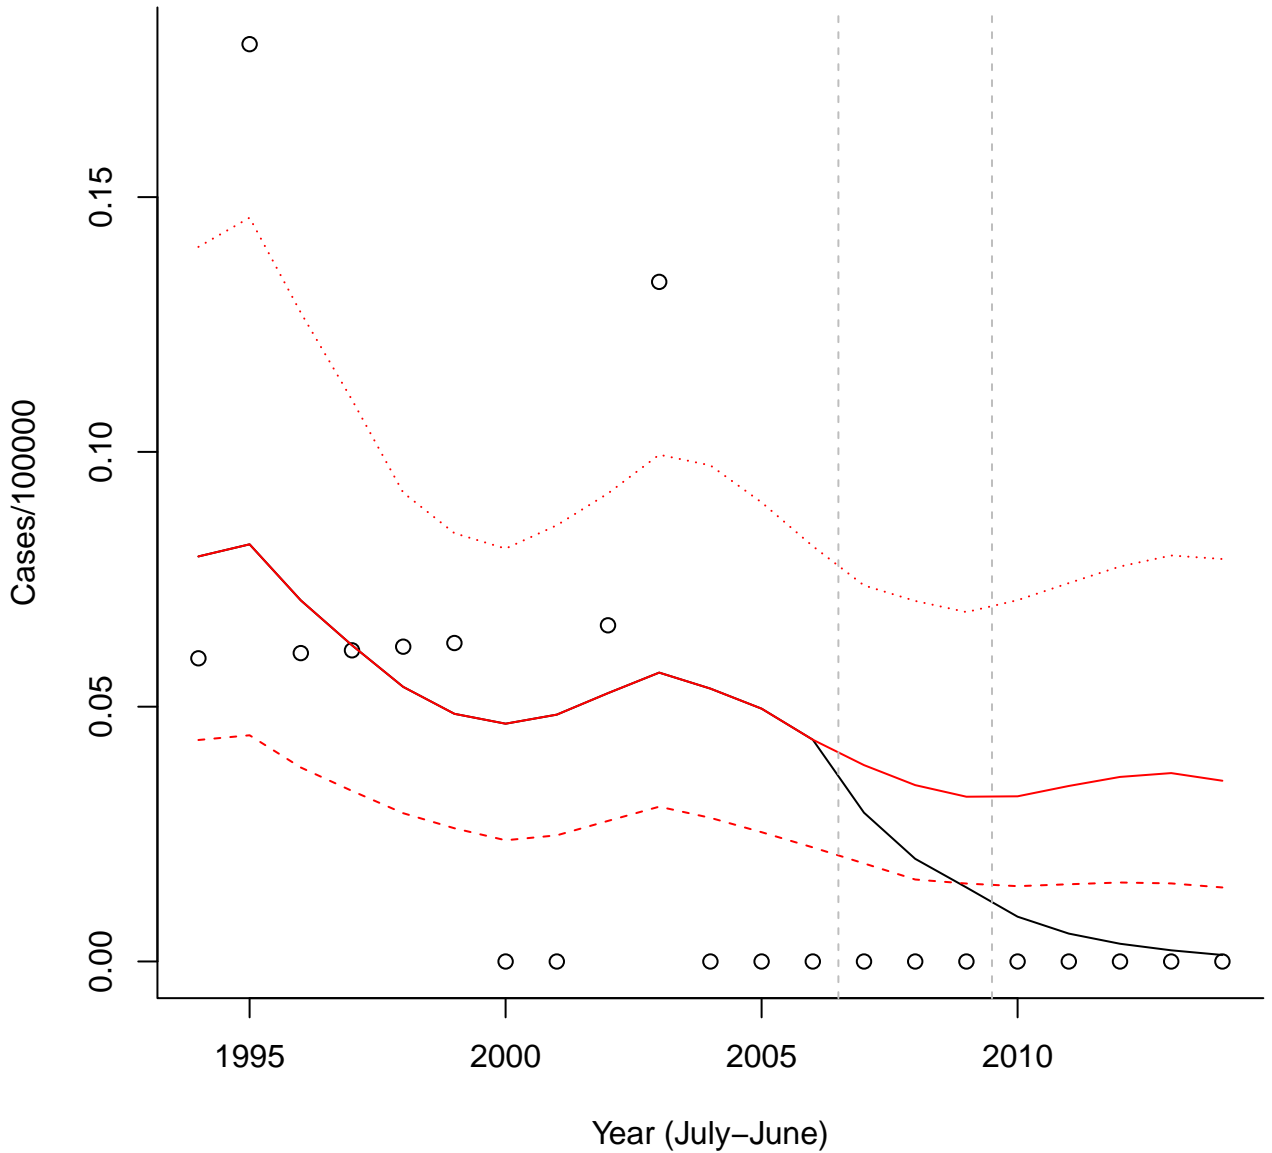

# 18–39y Without comorbidity Serotype 6C

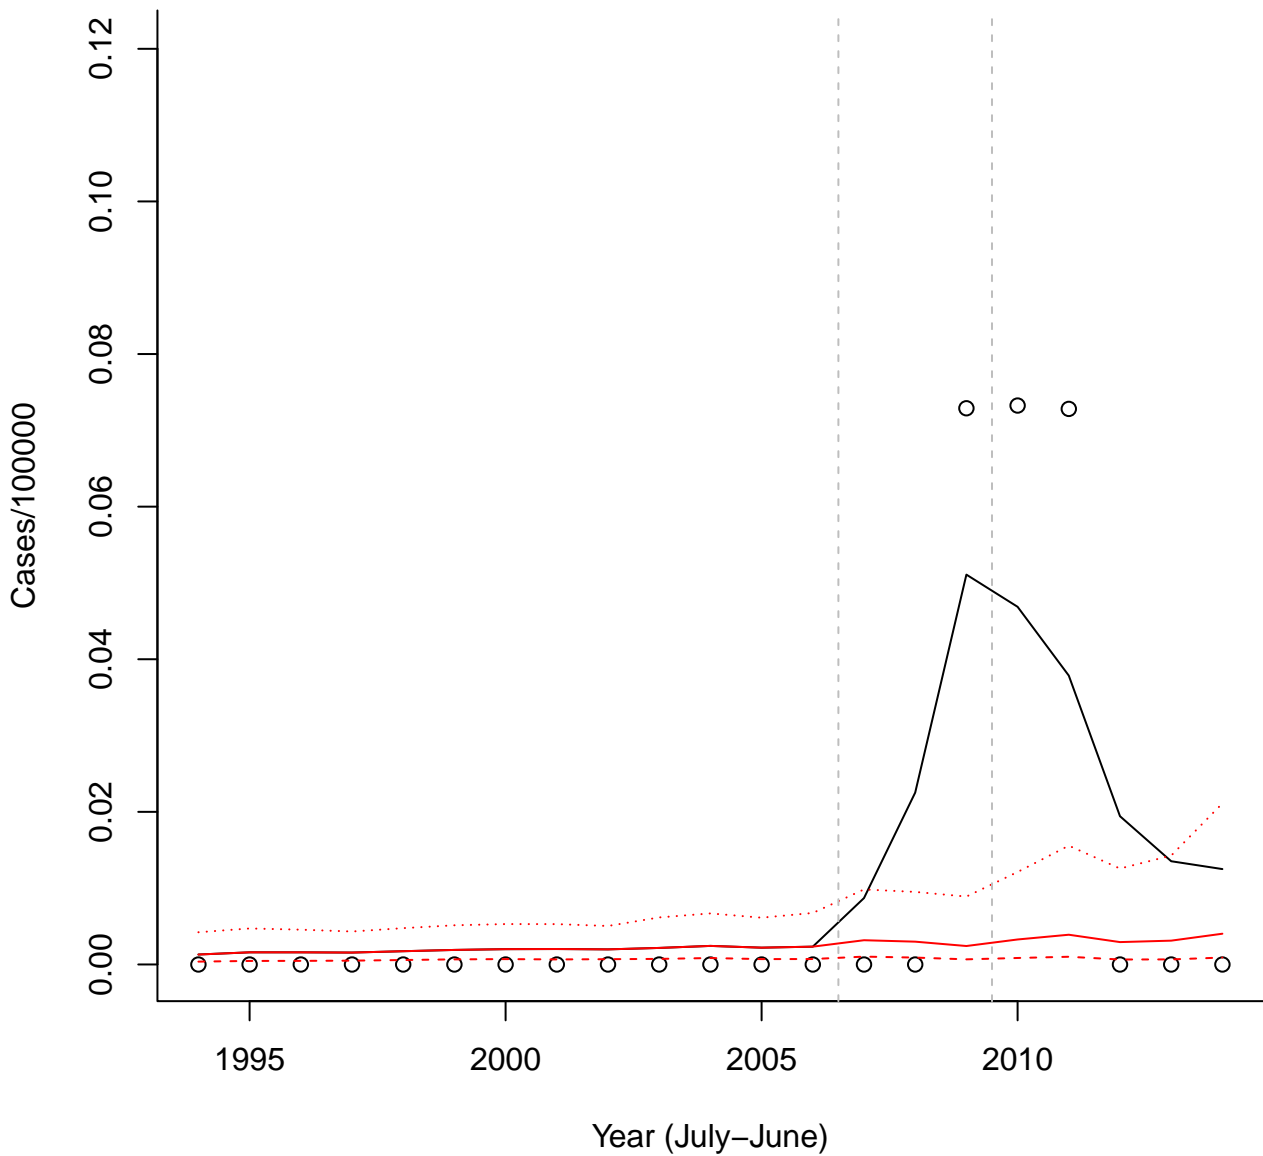



# 18-39y Without comorbidity Serotype 7F

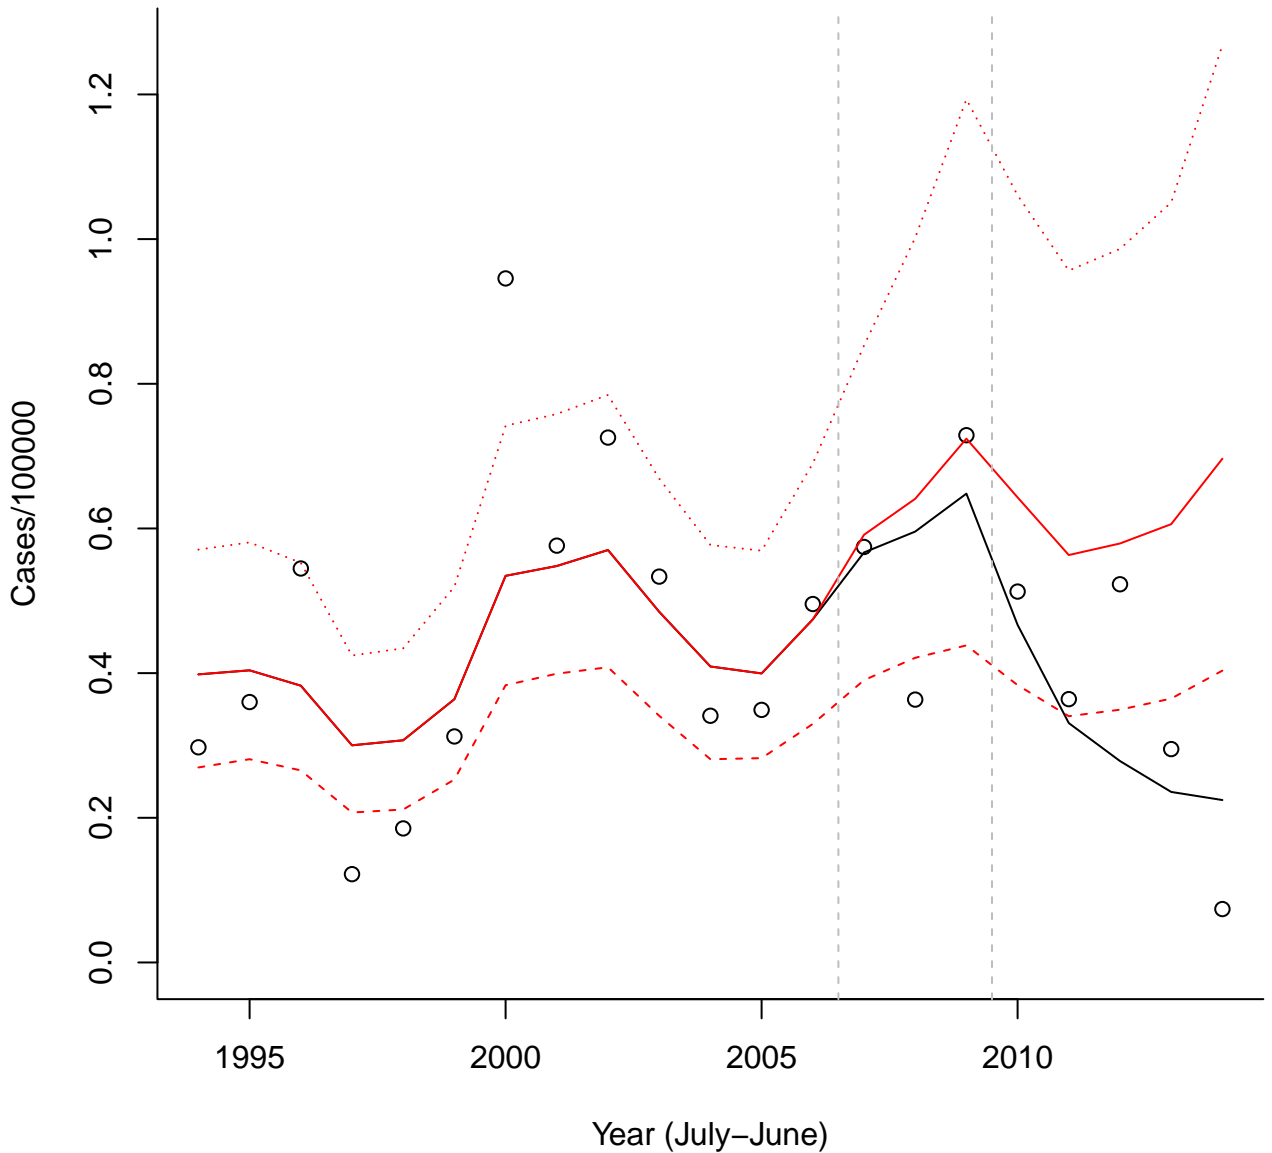

# 18–39y Without comorbidity Serotype 8

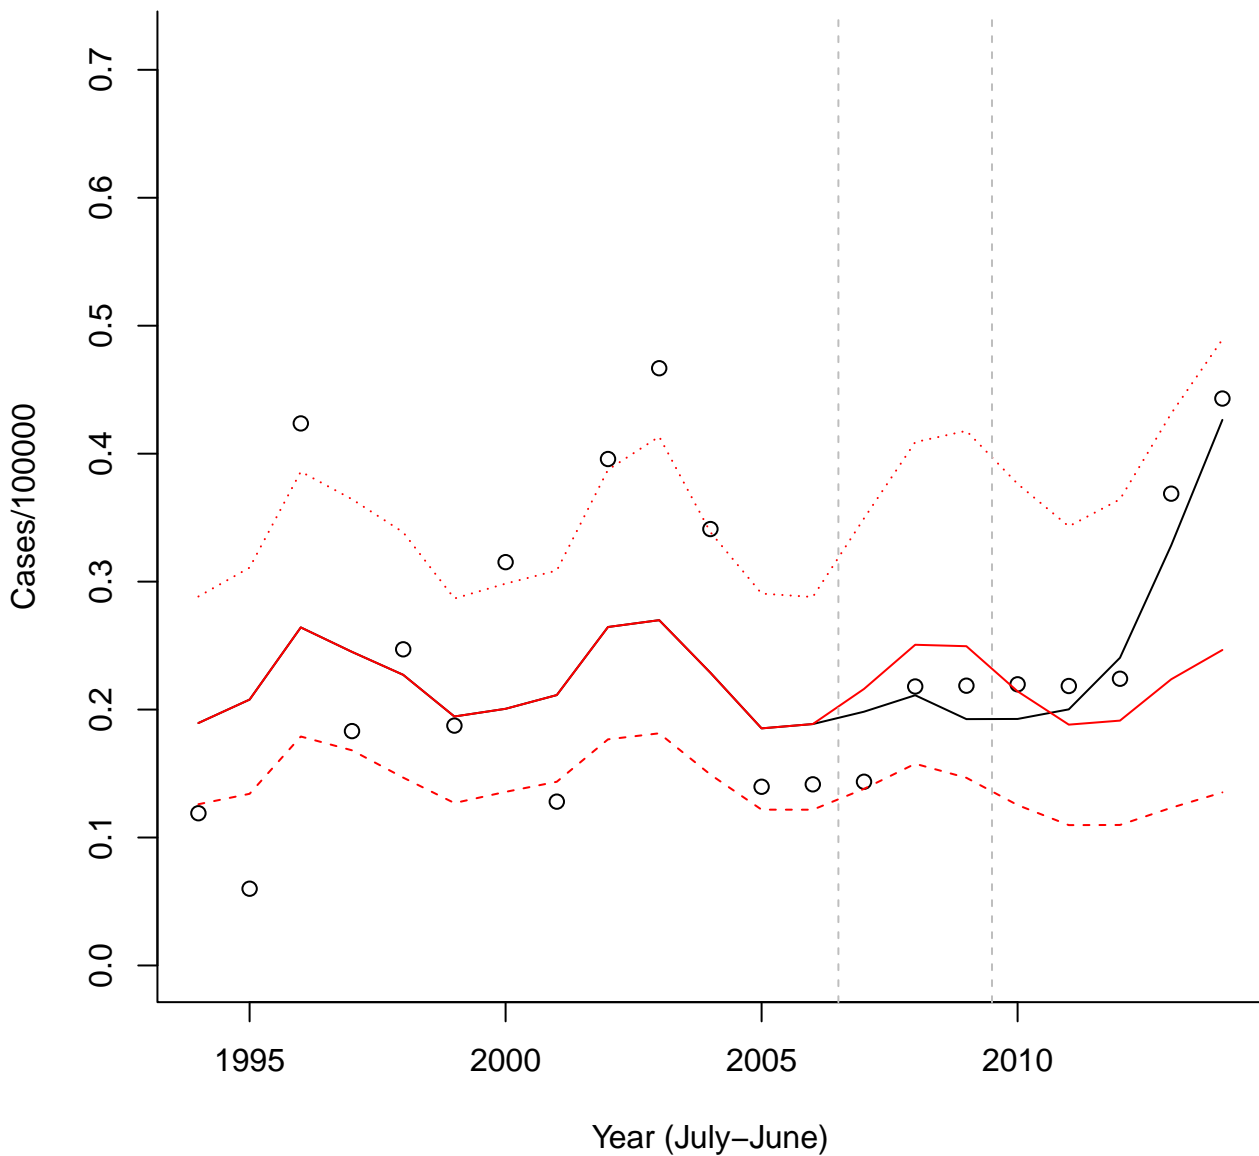

# 18-39y Without comorbidity Serotype 9N

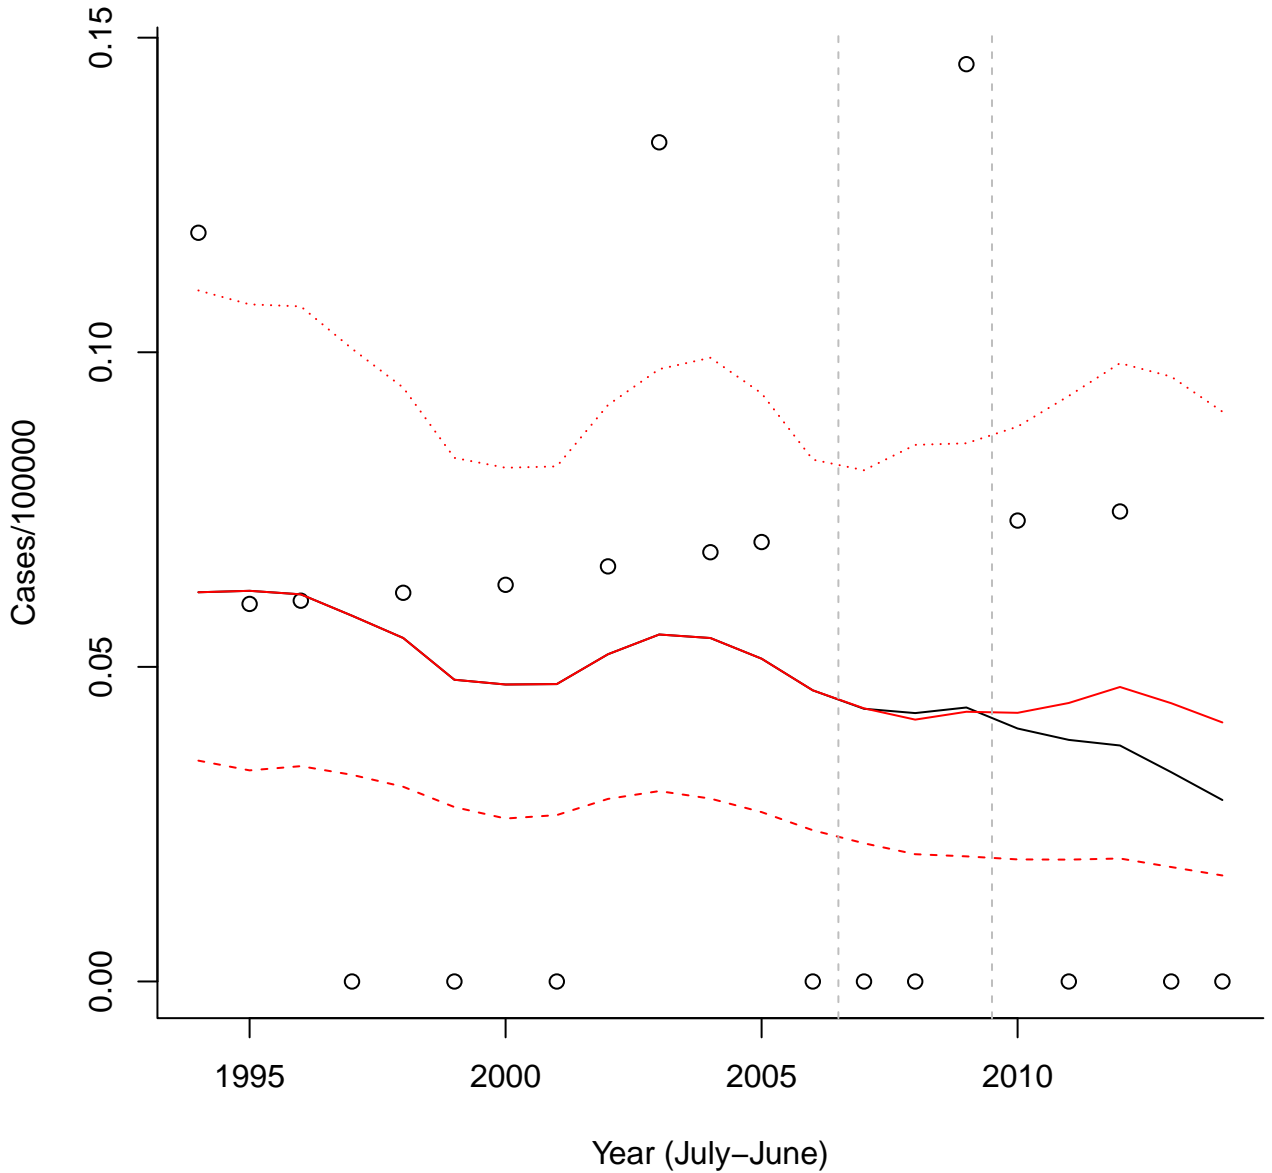

# 18–39y Without comorbidity Serotype 9V

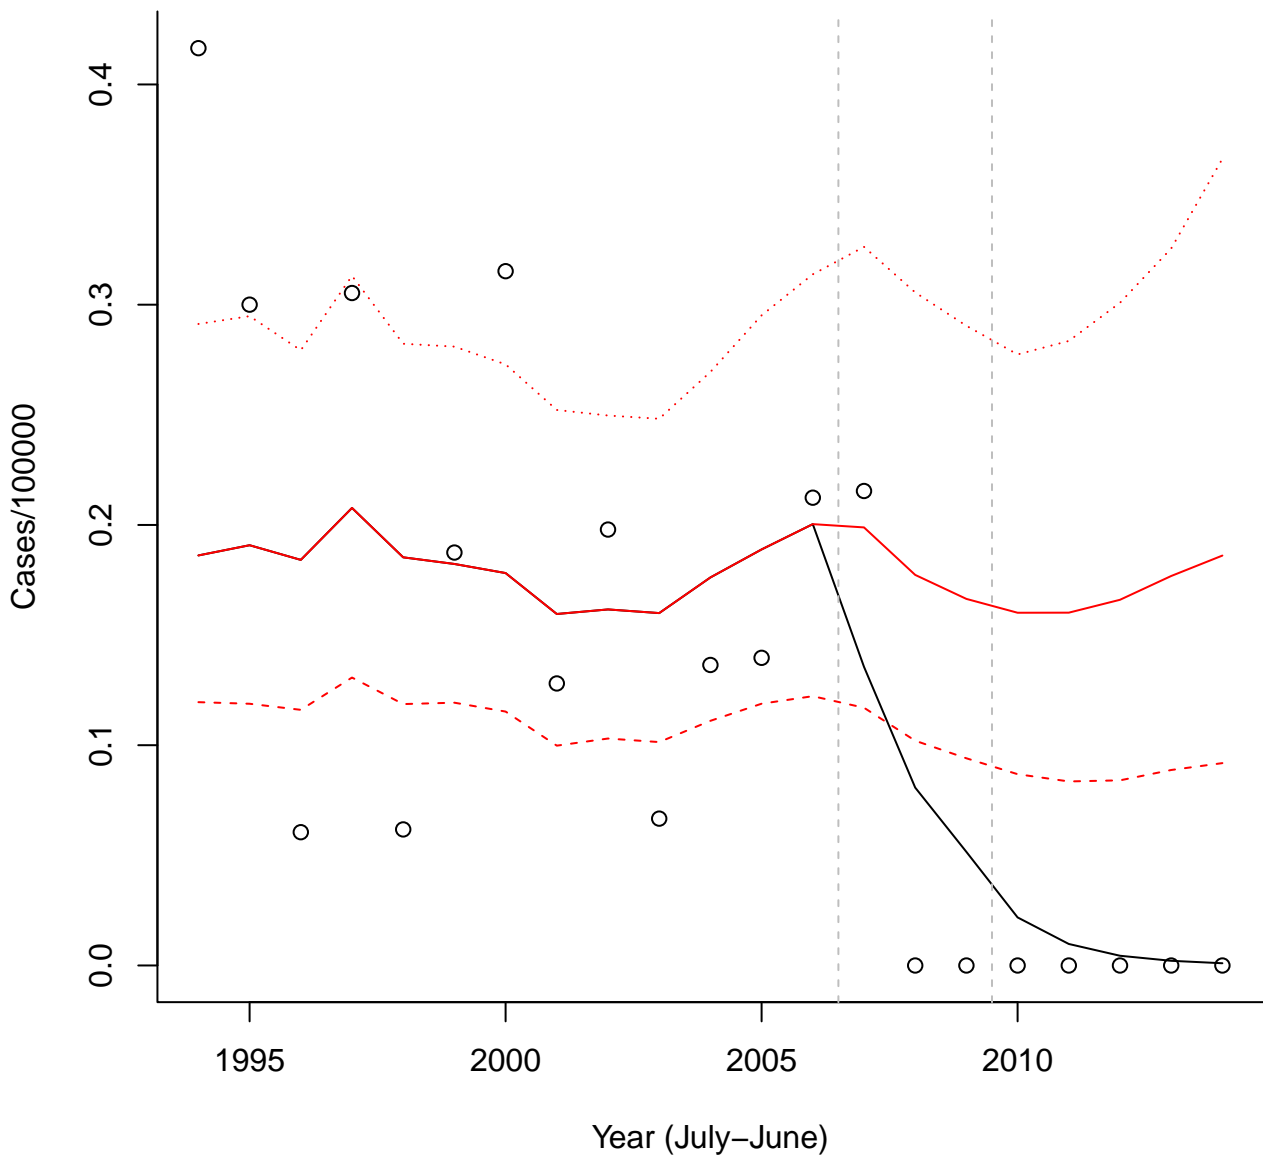

# 18–39y Without comorbidity Serotype OT0

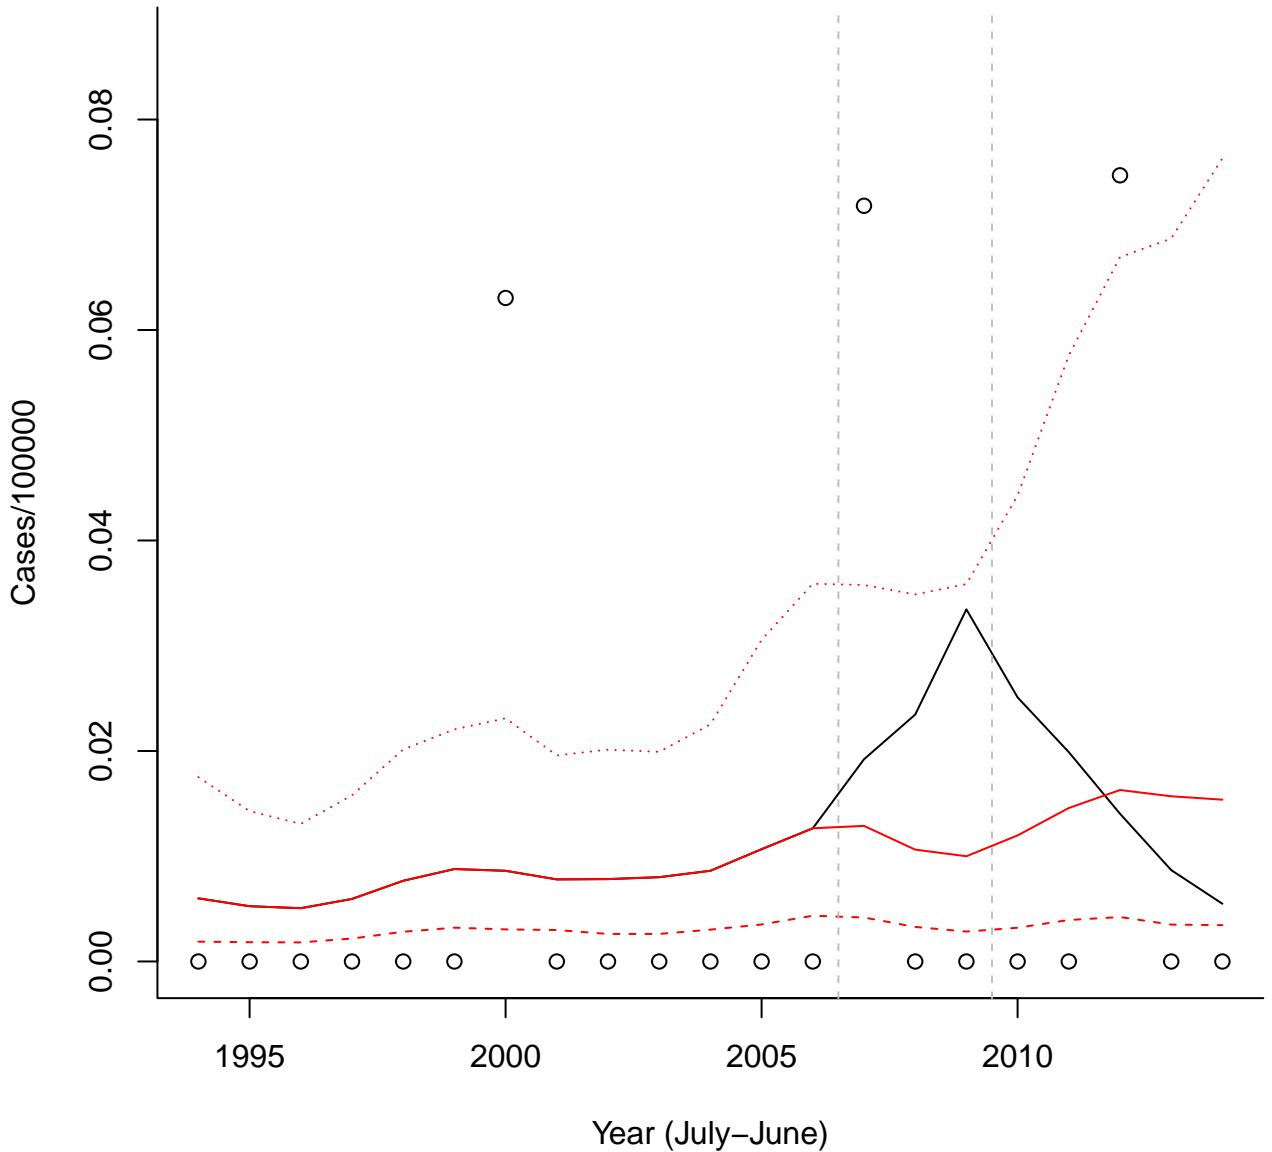

# 40–64y Without comorbidity Serotype 1

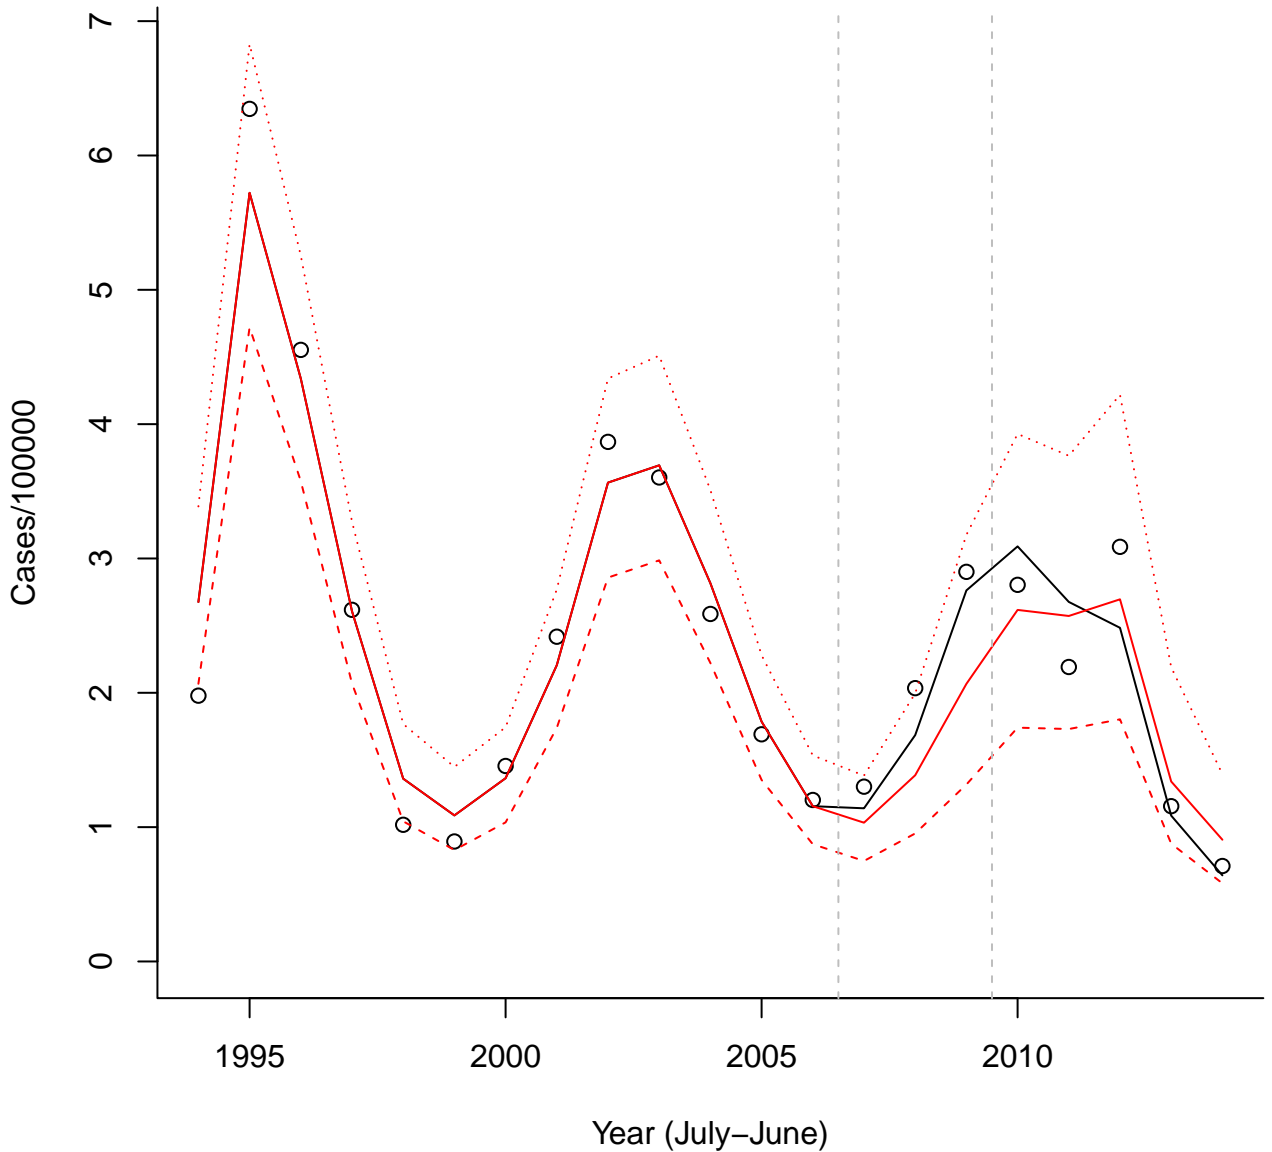

# 40-64y Without comorbidity Serotype 10A

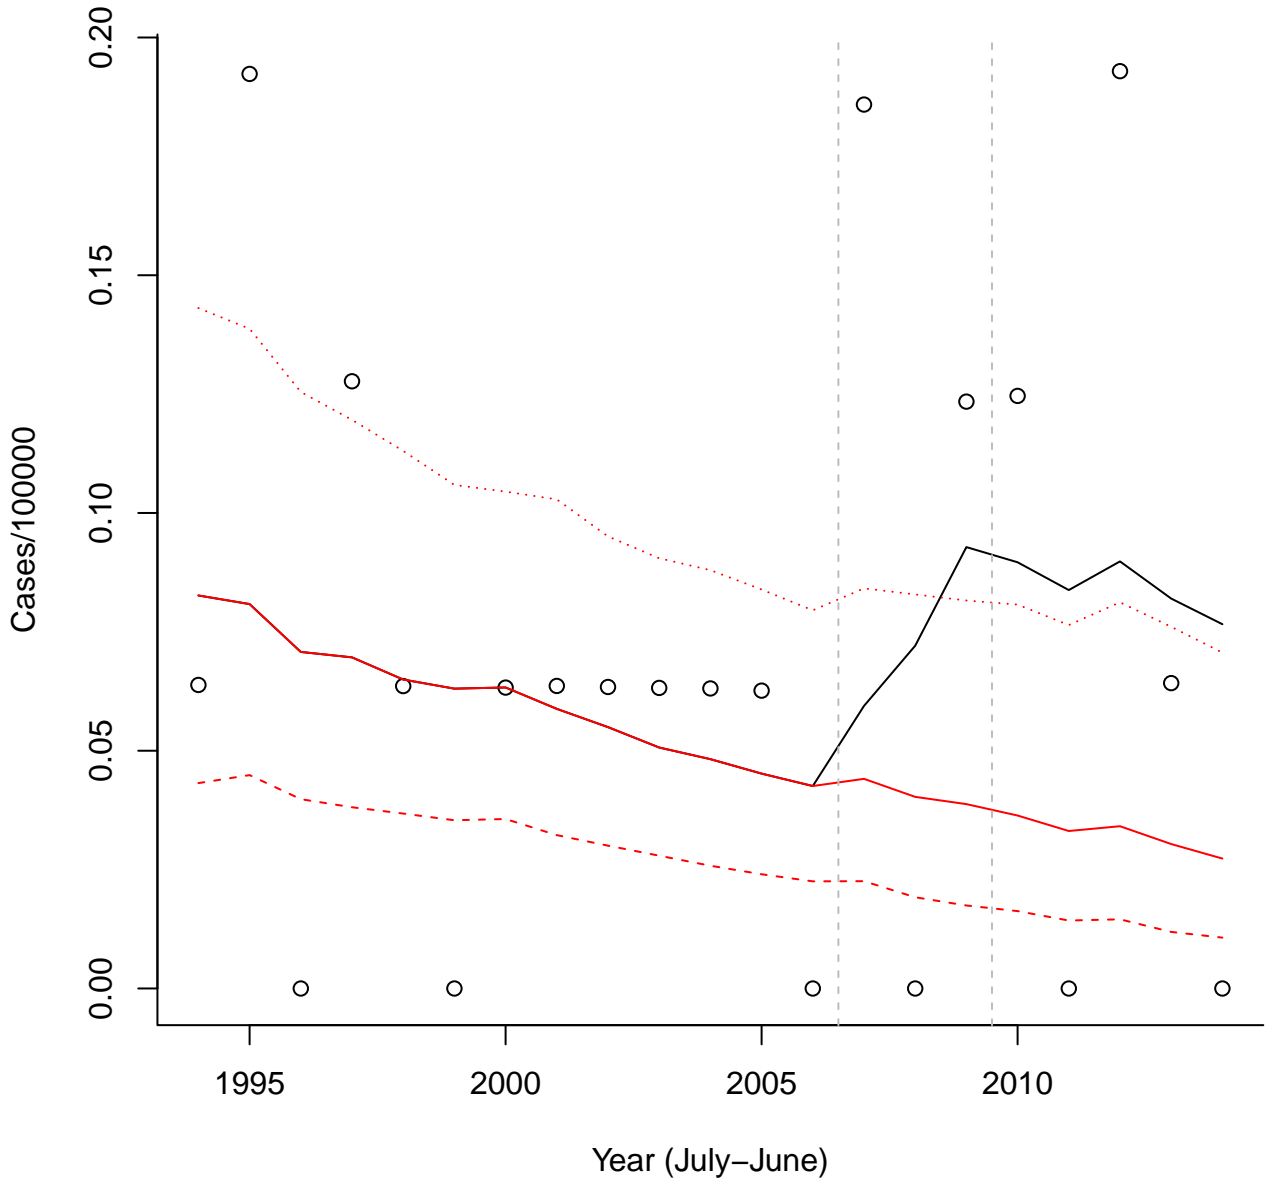

# 40-64y Without comorbidity Serotype 10B

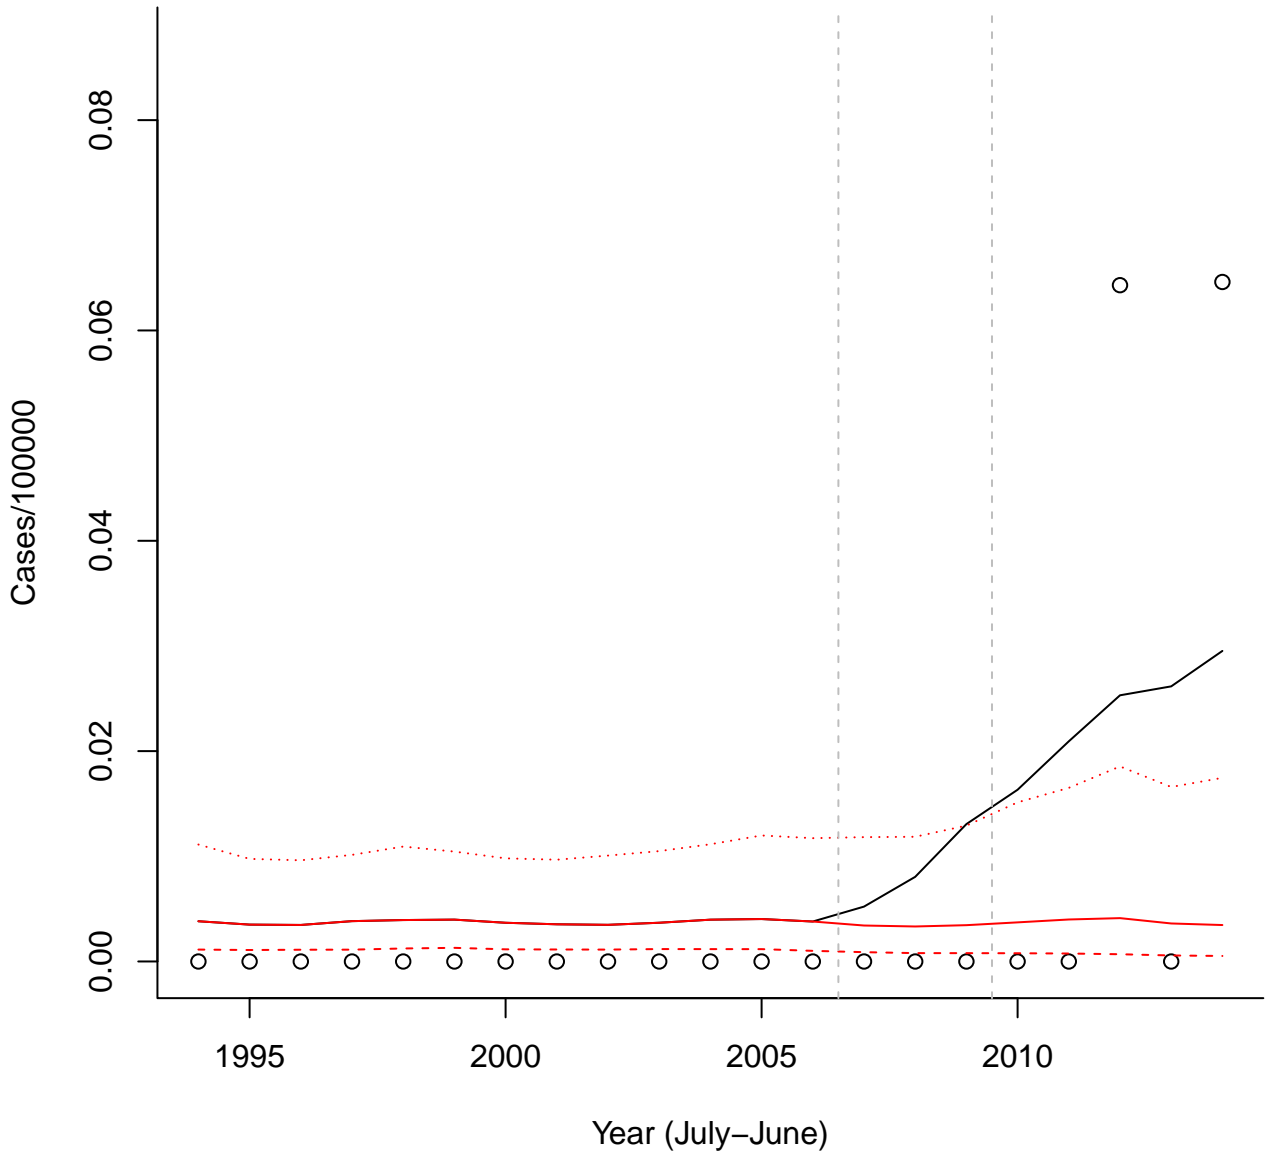



# 40-64y Without comorbidity Serotype 11A

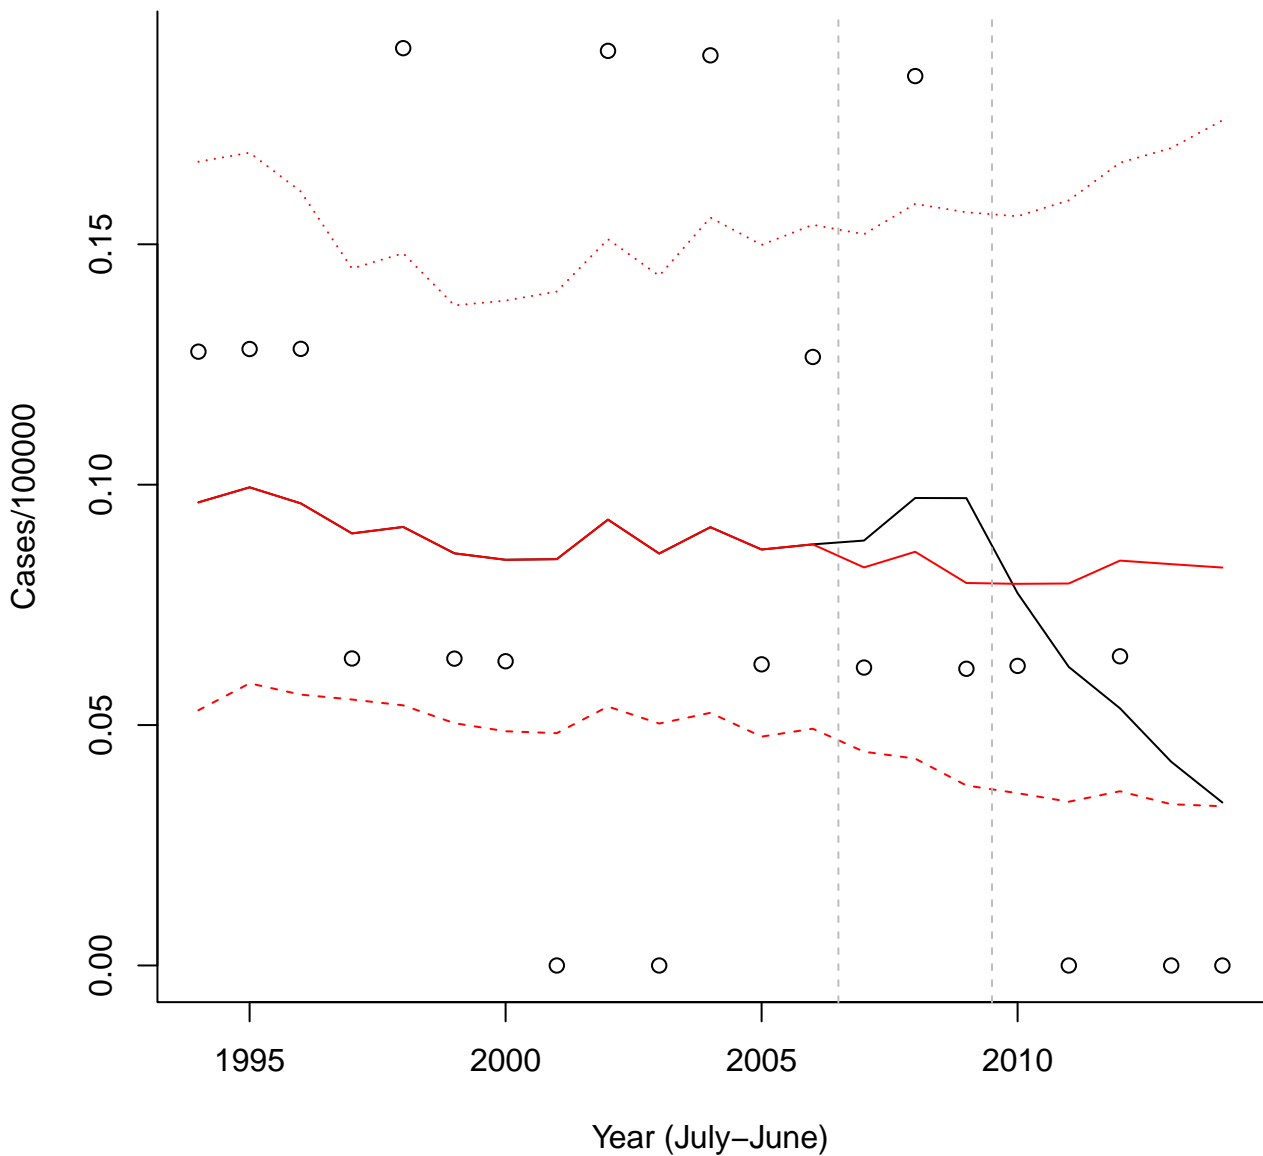

# 40-64y Without comorbidity Serotype 11B

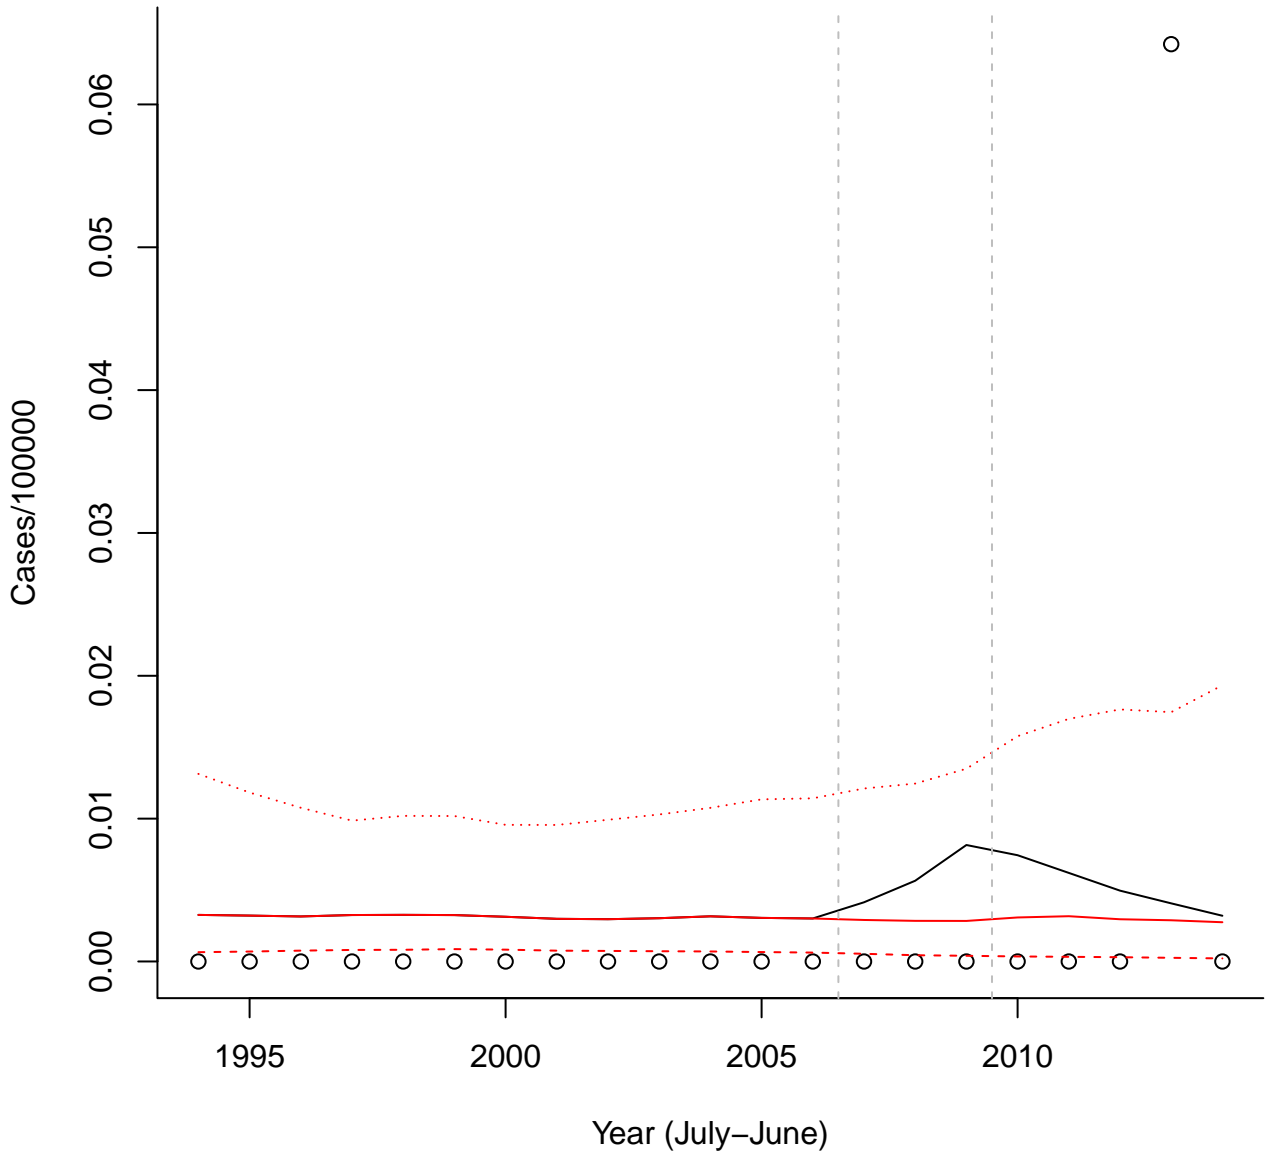

# 40-64y Without comorbidity Serotype 12A

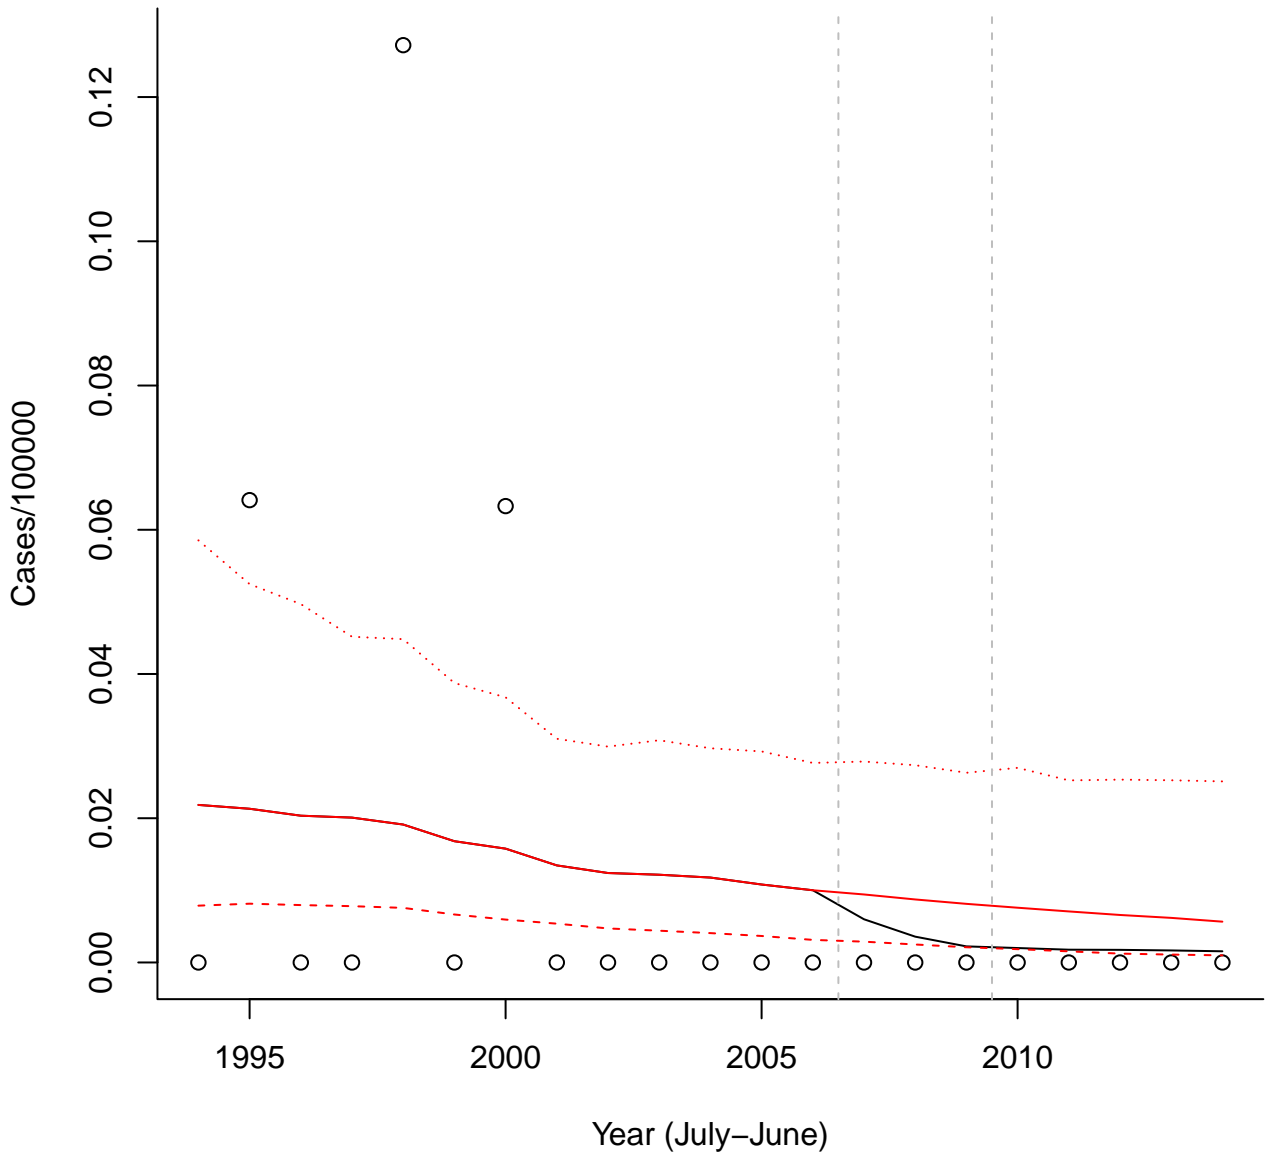

# 40-64y Without comorbidity Serotype 12F

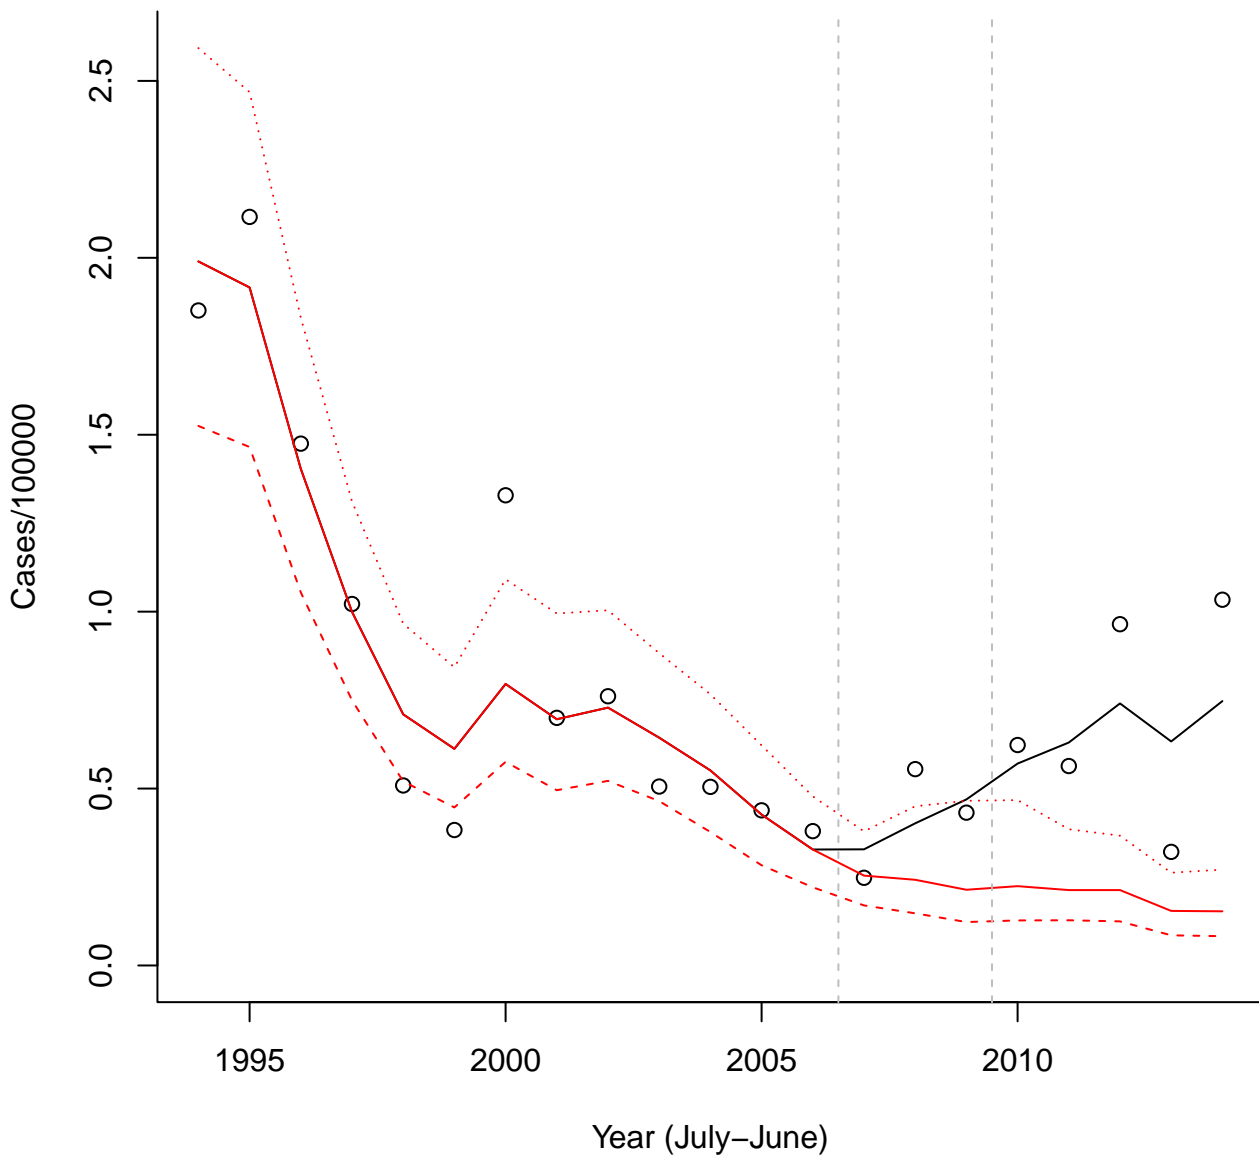

# 40–64y Without comorbidity Serotype 13

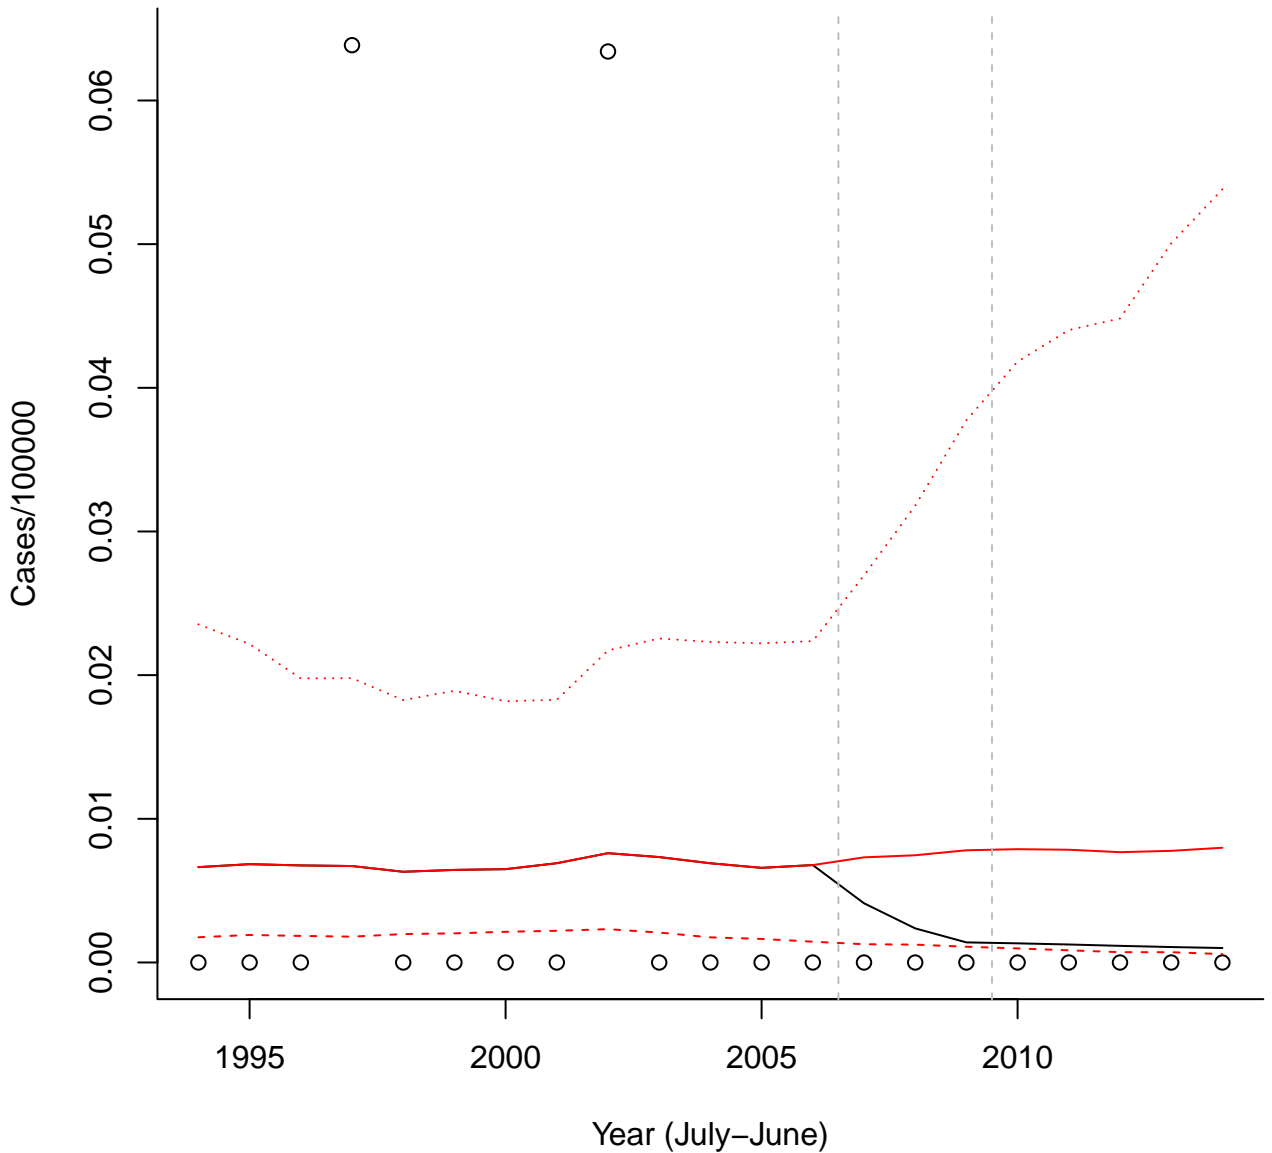

# 40–64y Without comorbidity Serotype 14

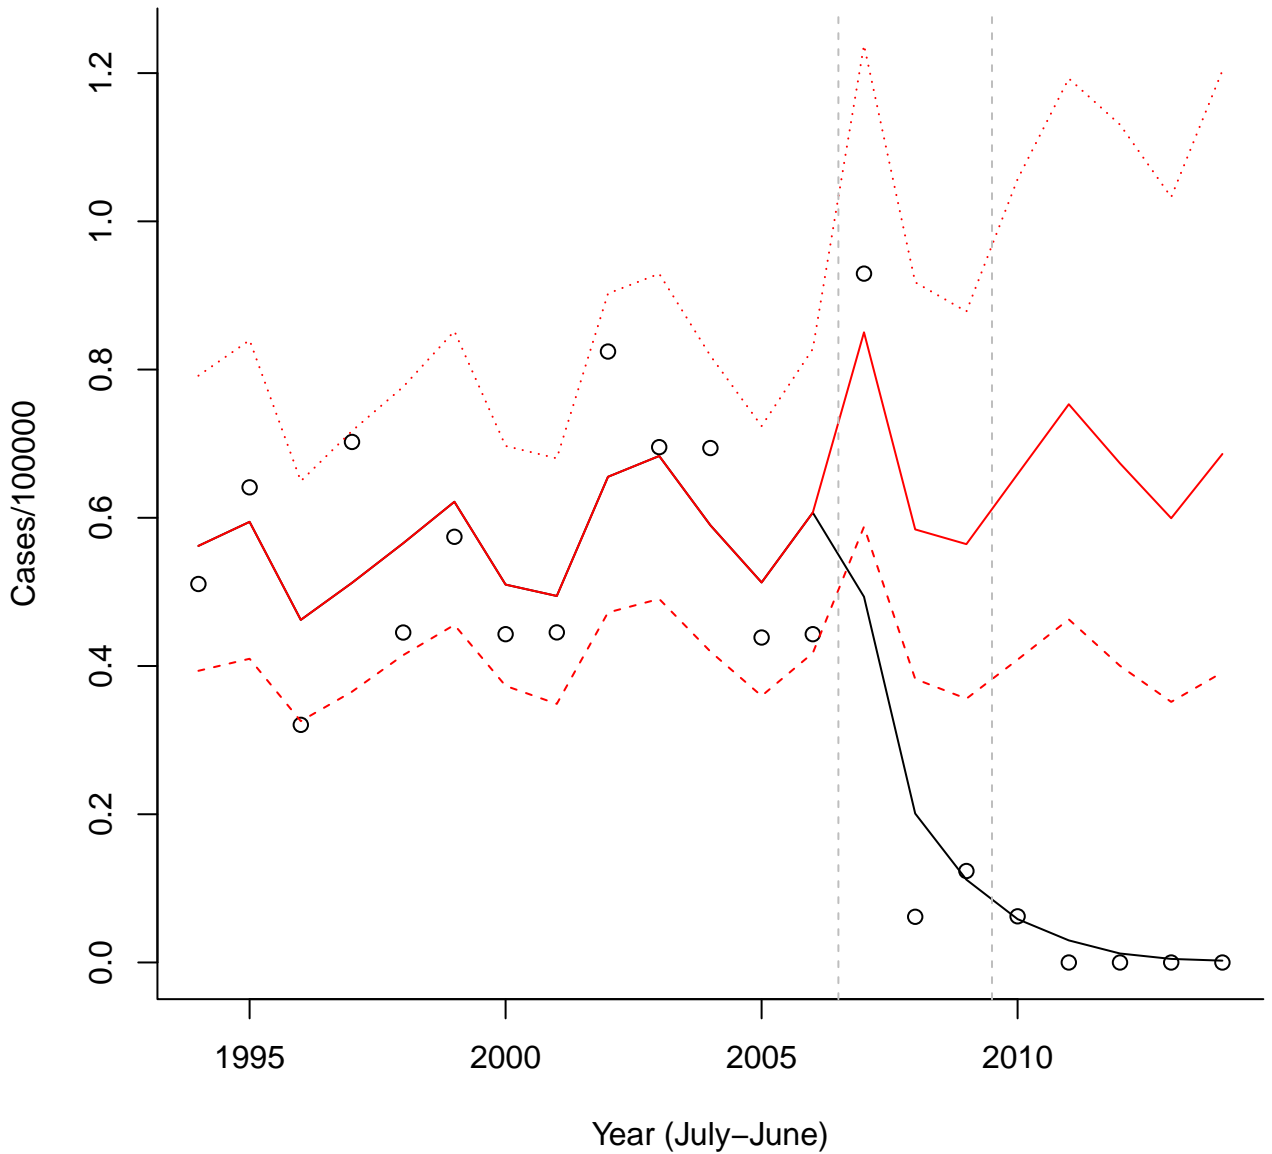

# 40–64y Without comorbidity Serotype 15A

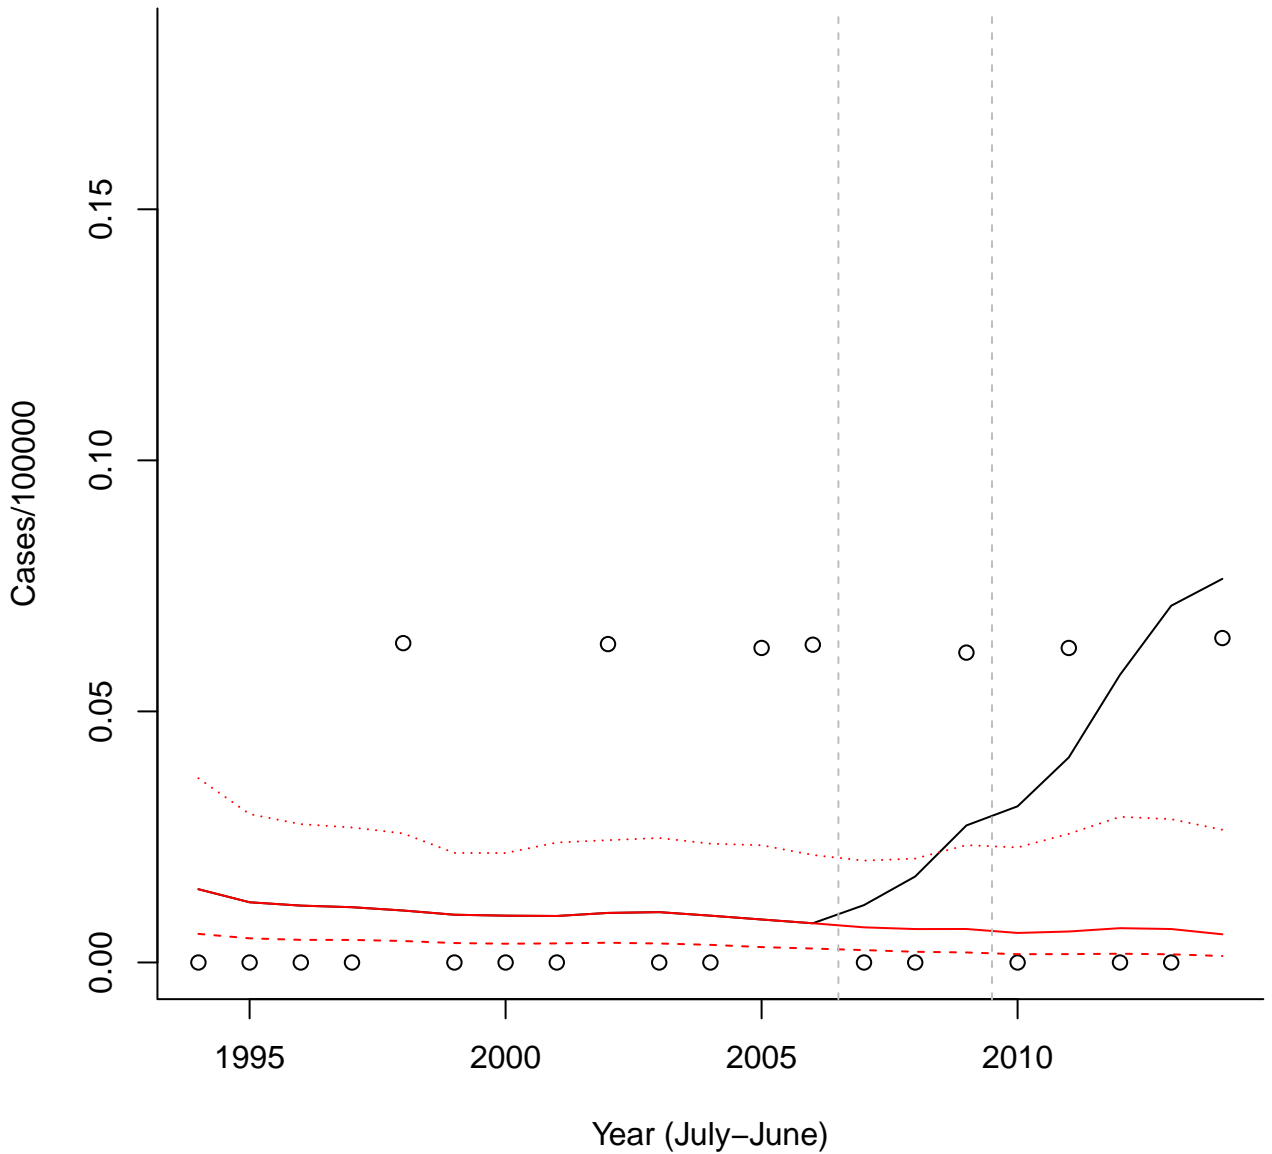

# 40-64y Without comorbidity Serotype 15BC

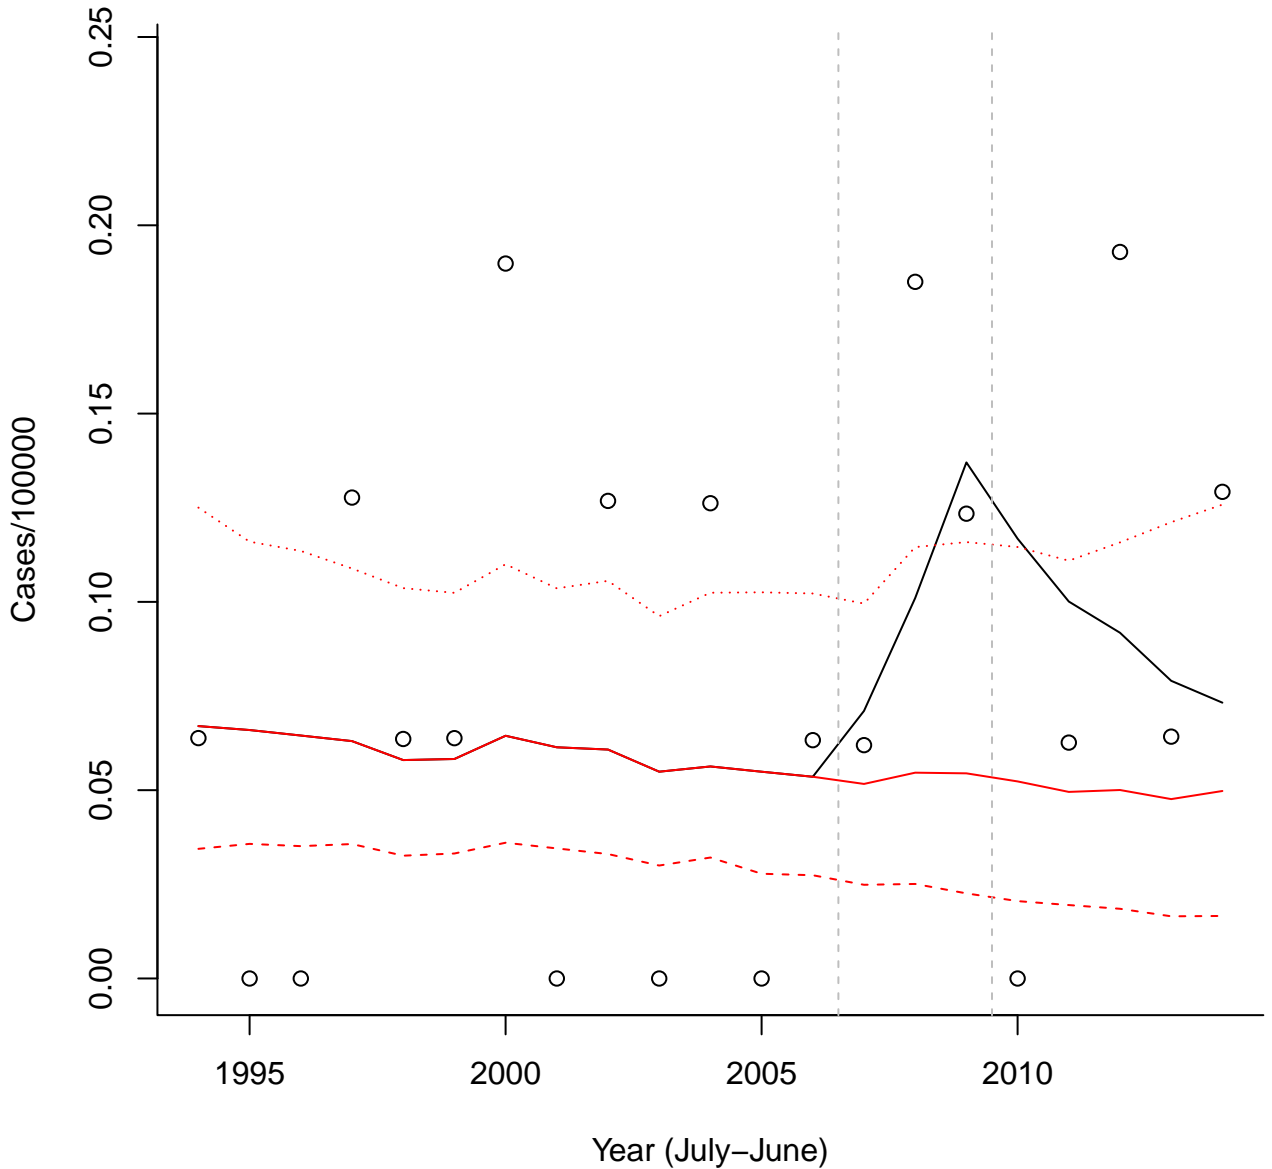



# 40-64y Without comorbidity Serotype 16F

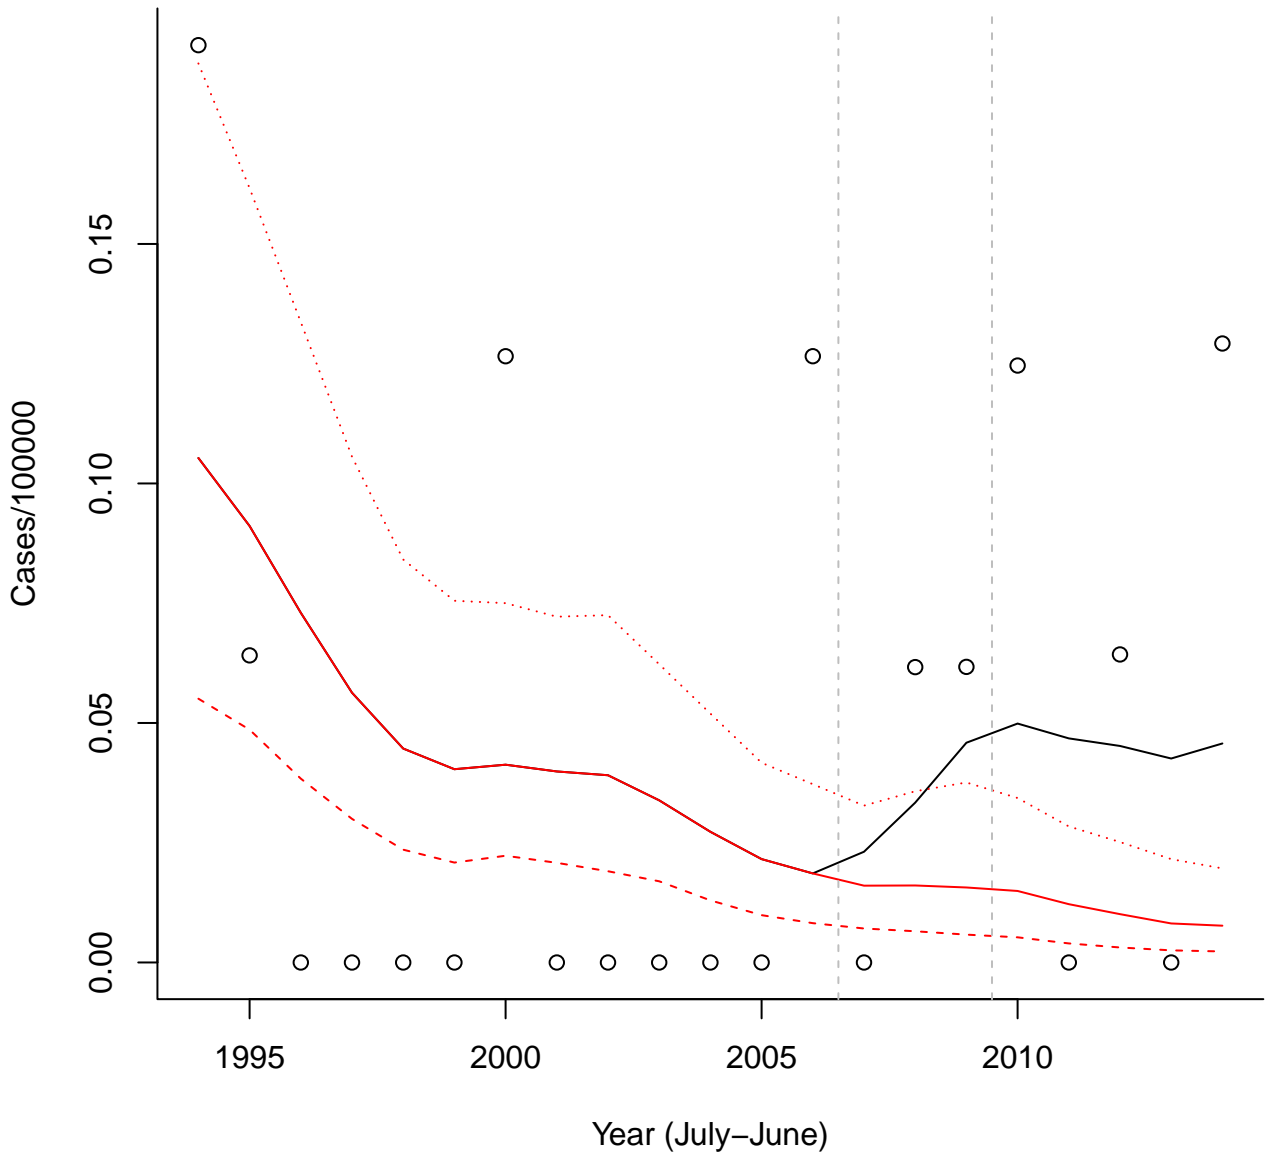

# 40-64y Without comorbidity Serotype 17F

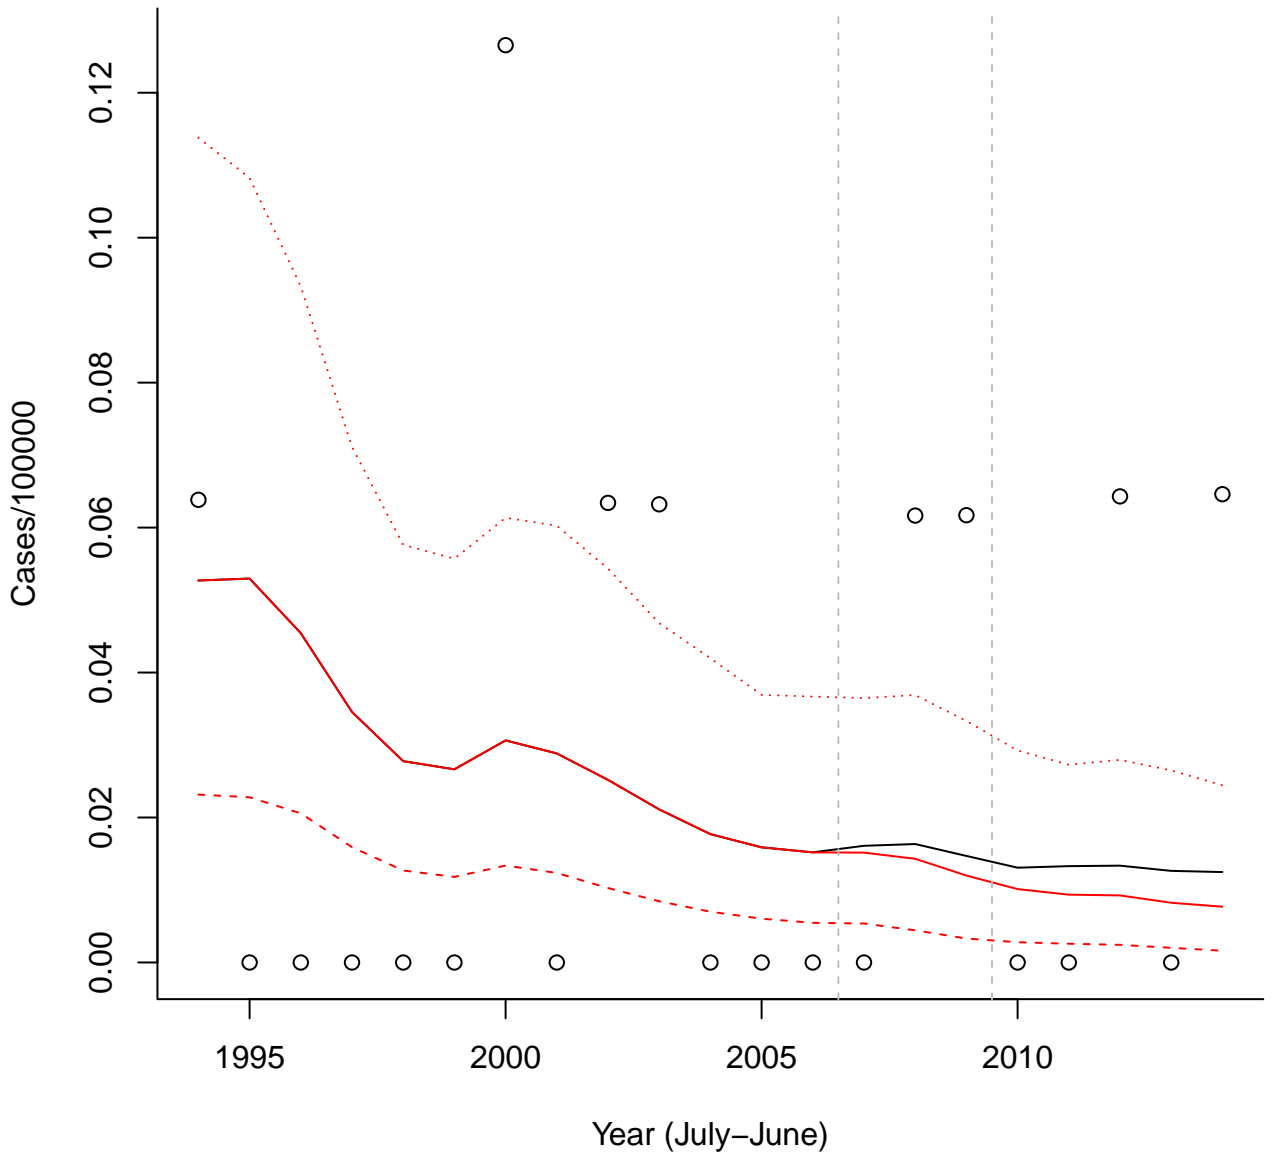

# 40-64y Without comorbidity Serotype 18B

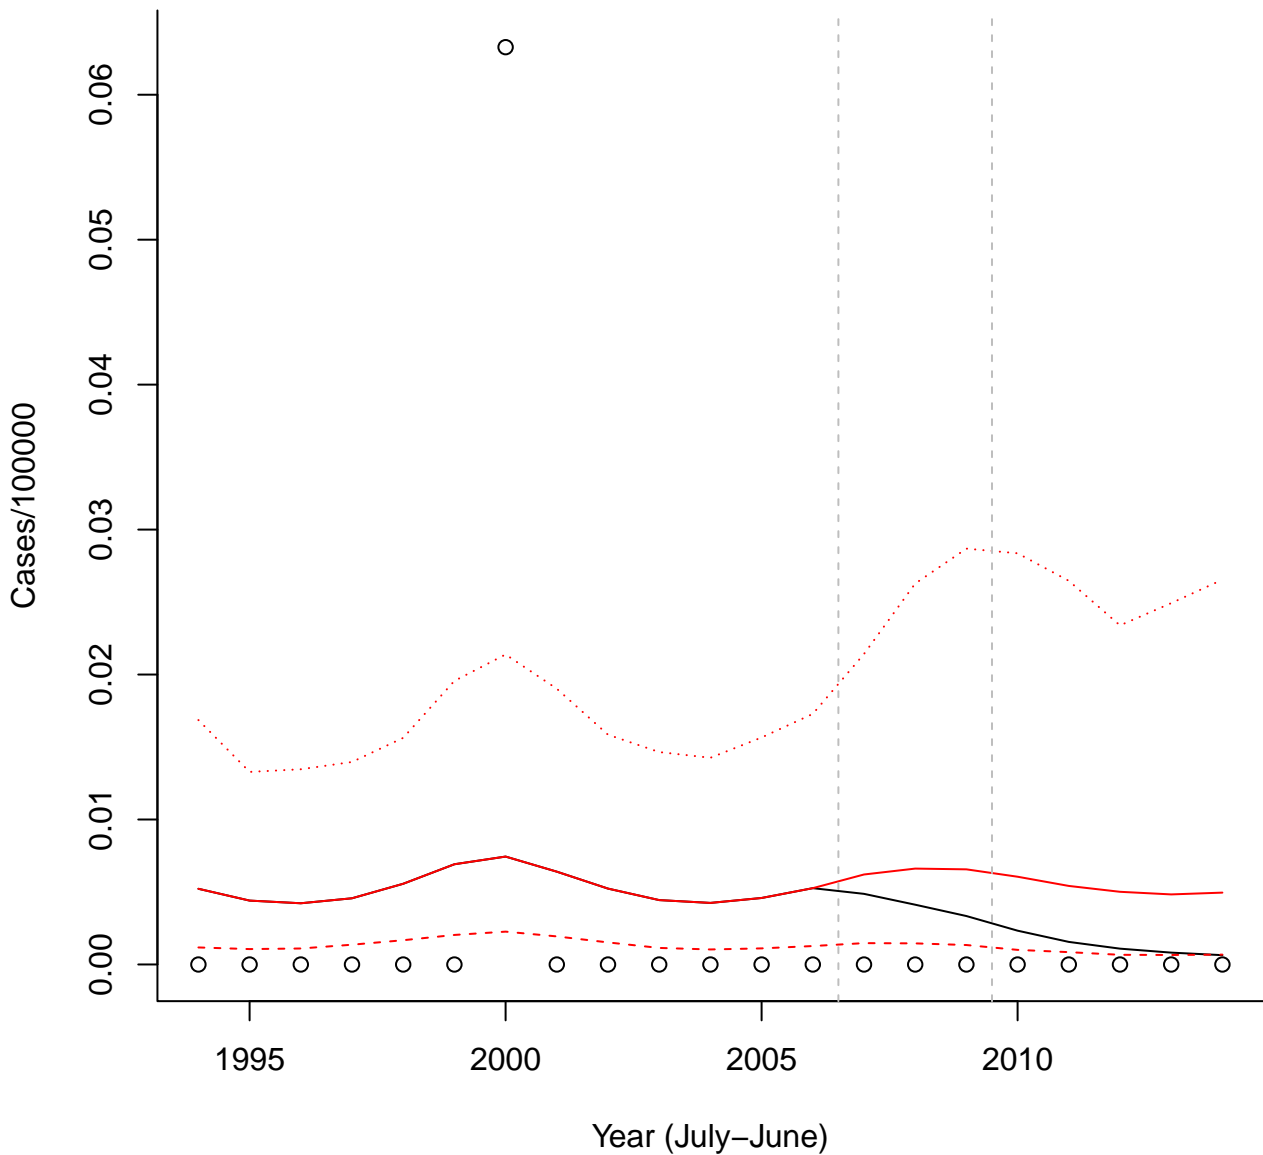

# 40-64y Without comorbidity Serotype 18C

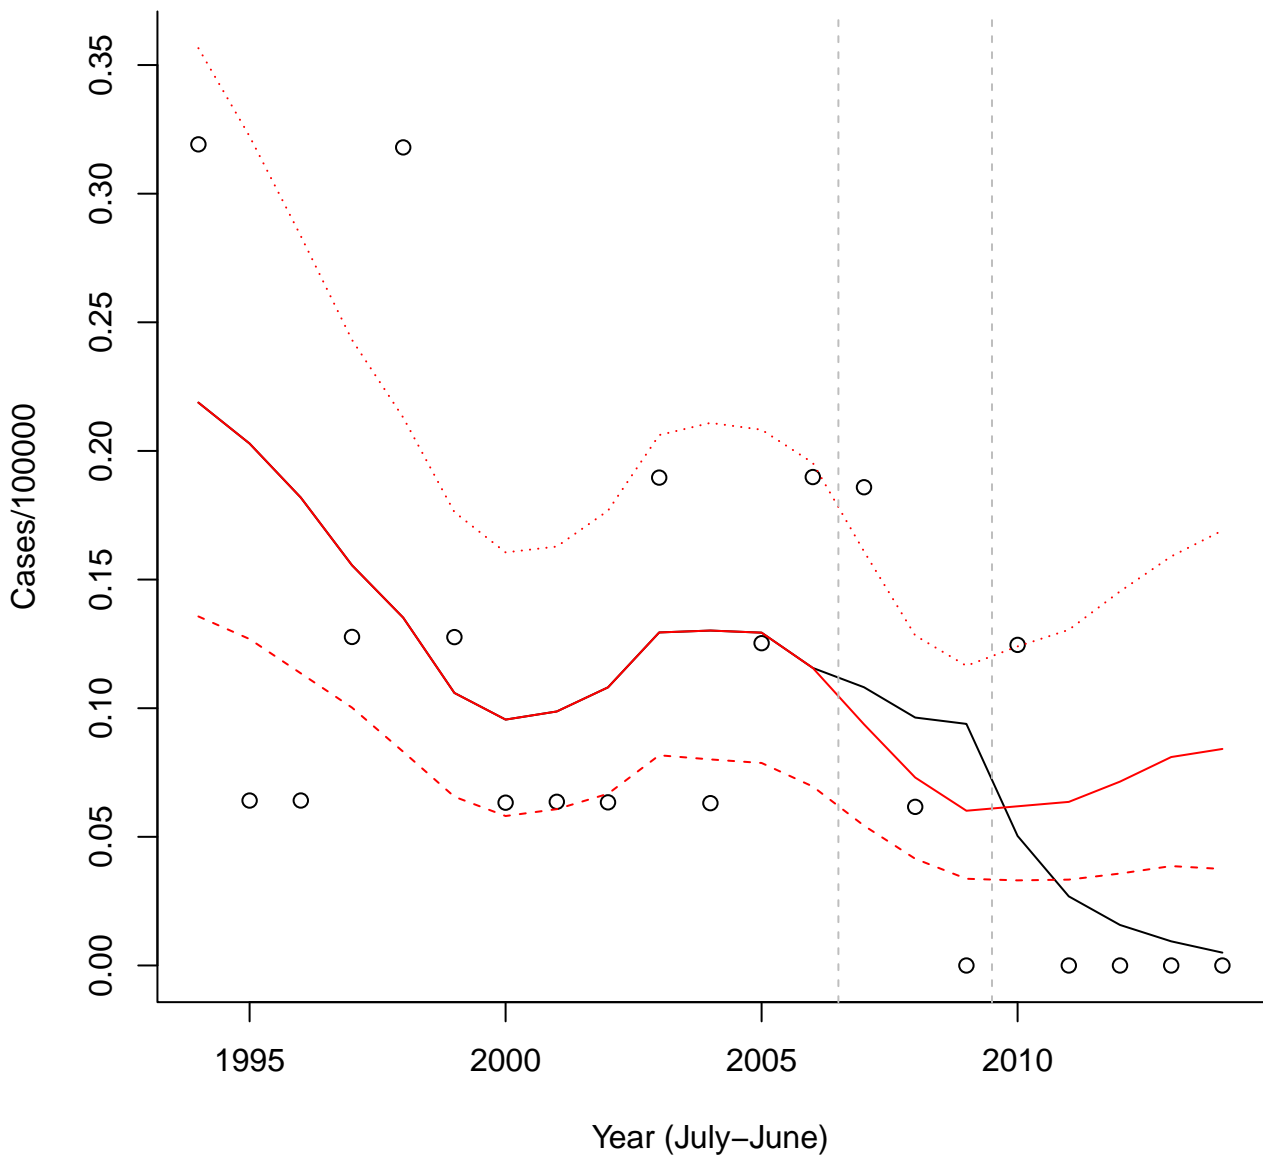

# 40-64y Without comorbidity Serotype 18F

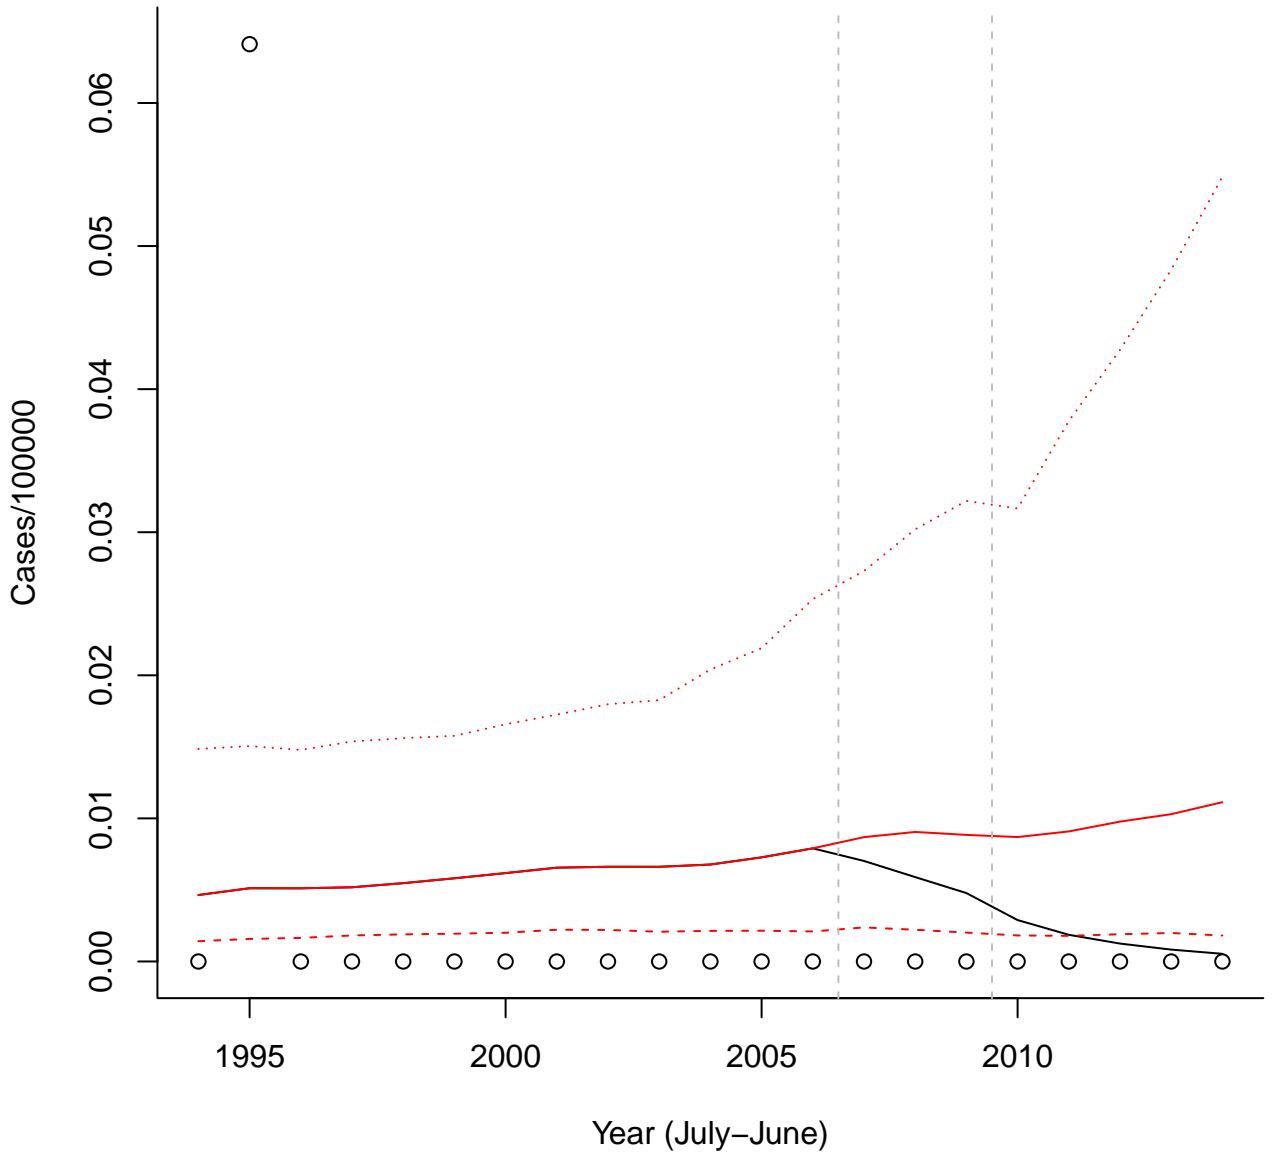

# 40-64y Without comorbidity Serotype 19A

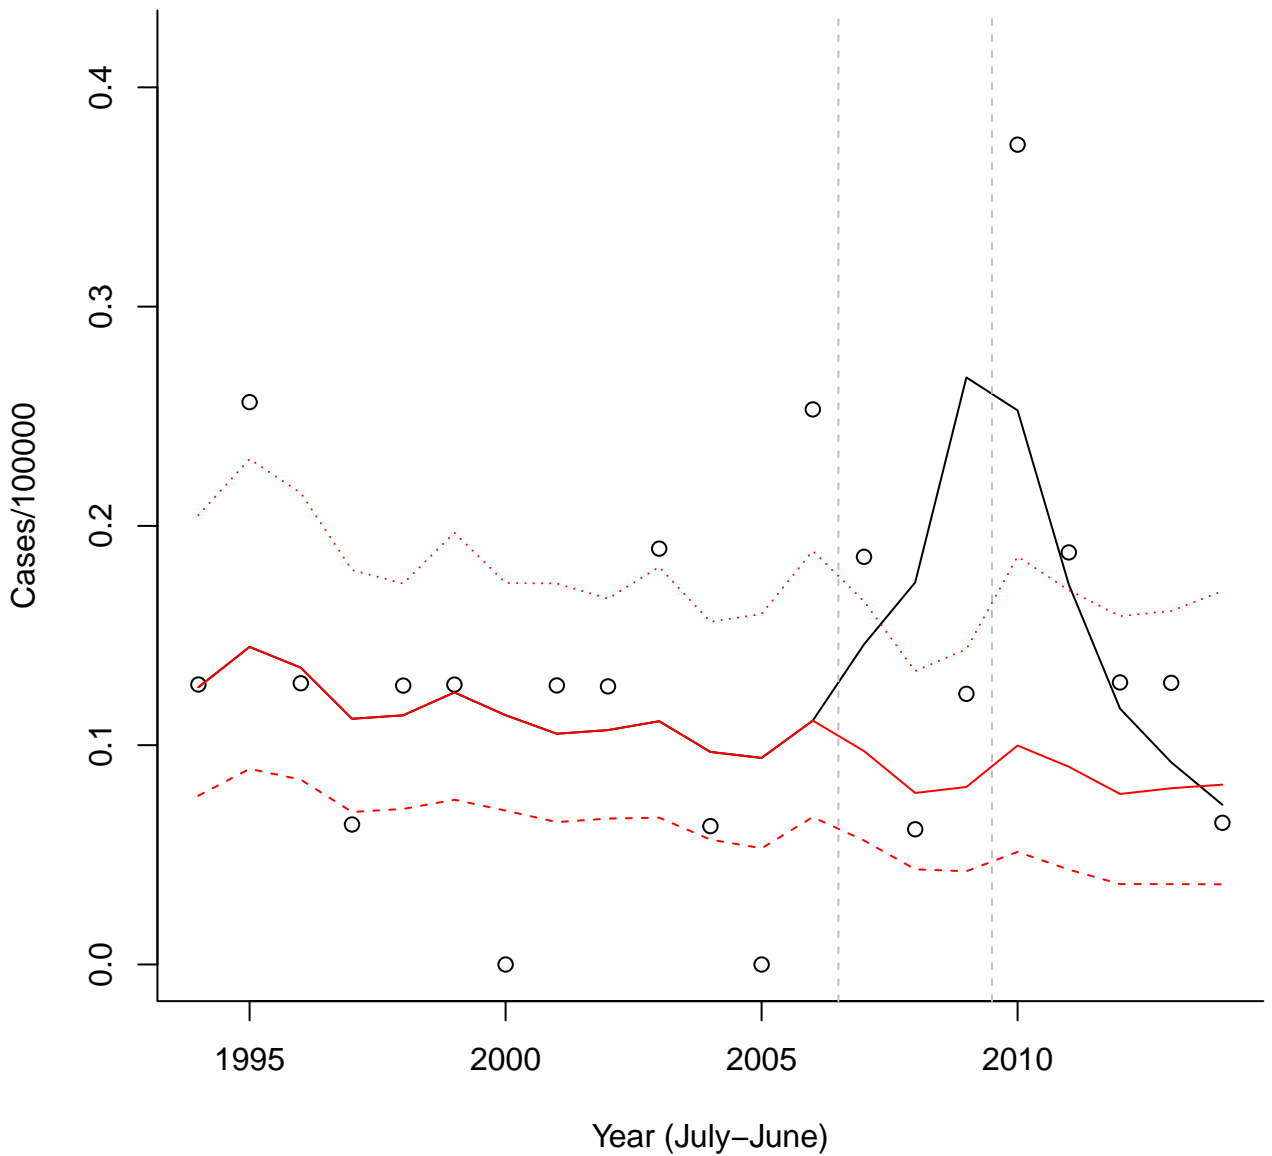

# 40-64y Without comorbidity Serotype 19F

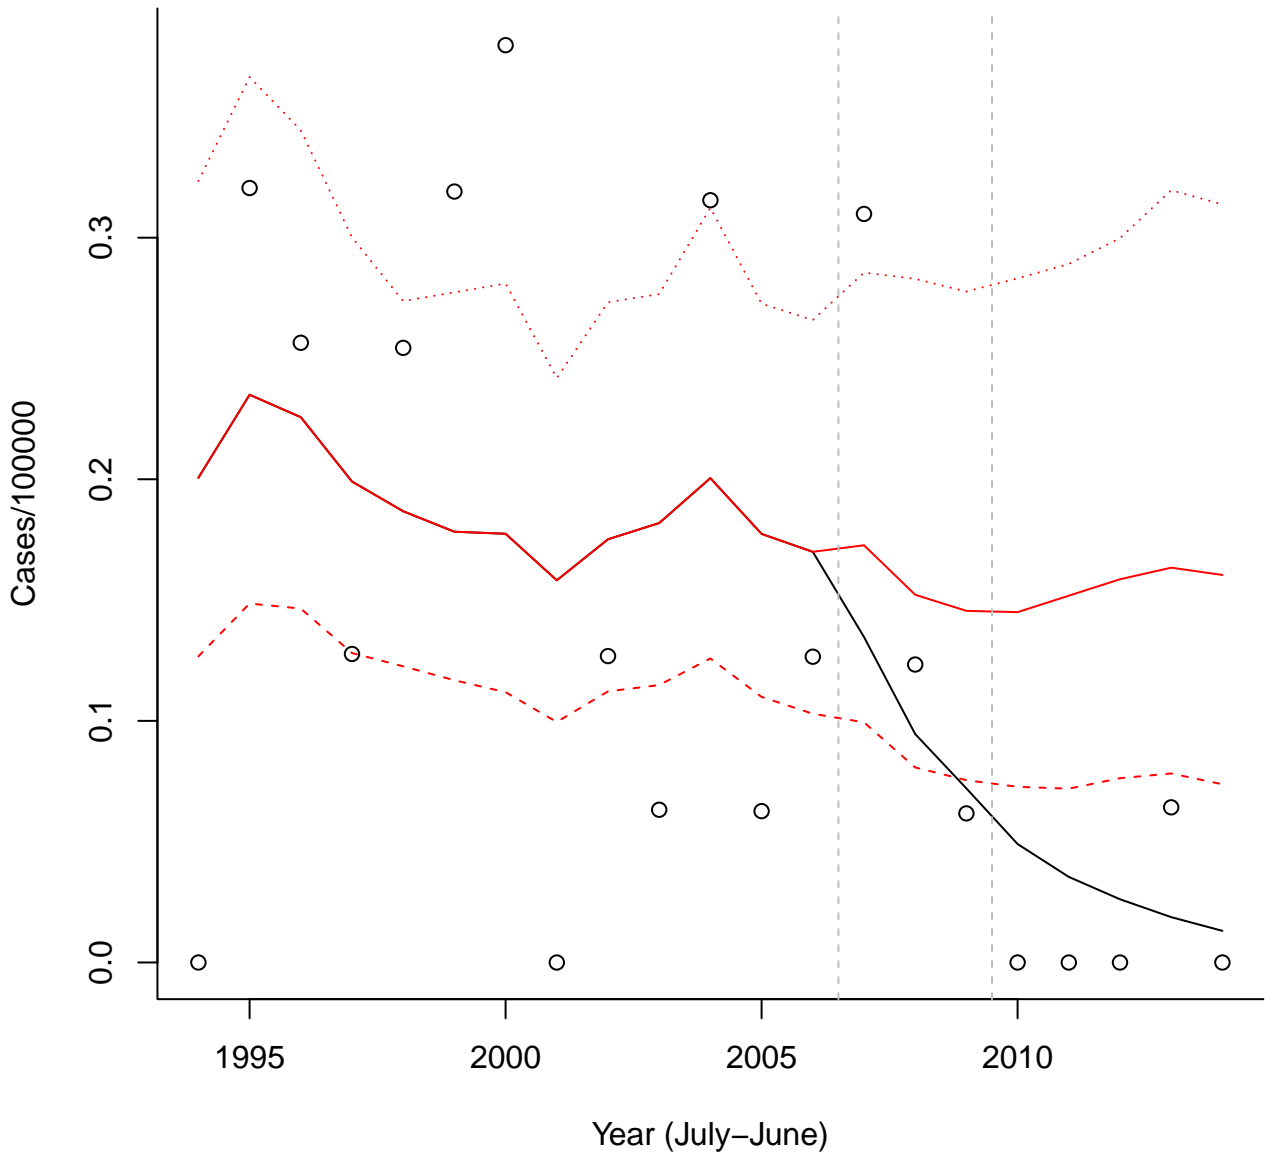

# 40–64y Without comorbidity Serotype 2

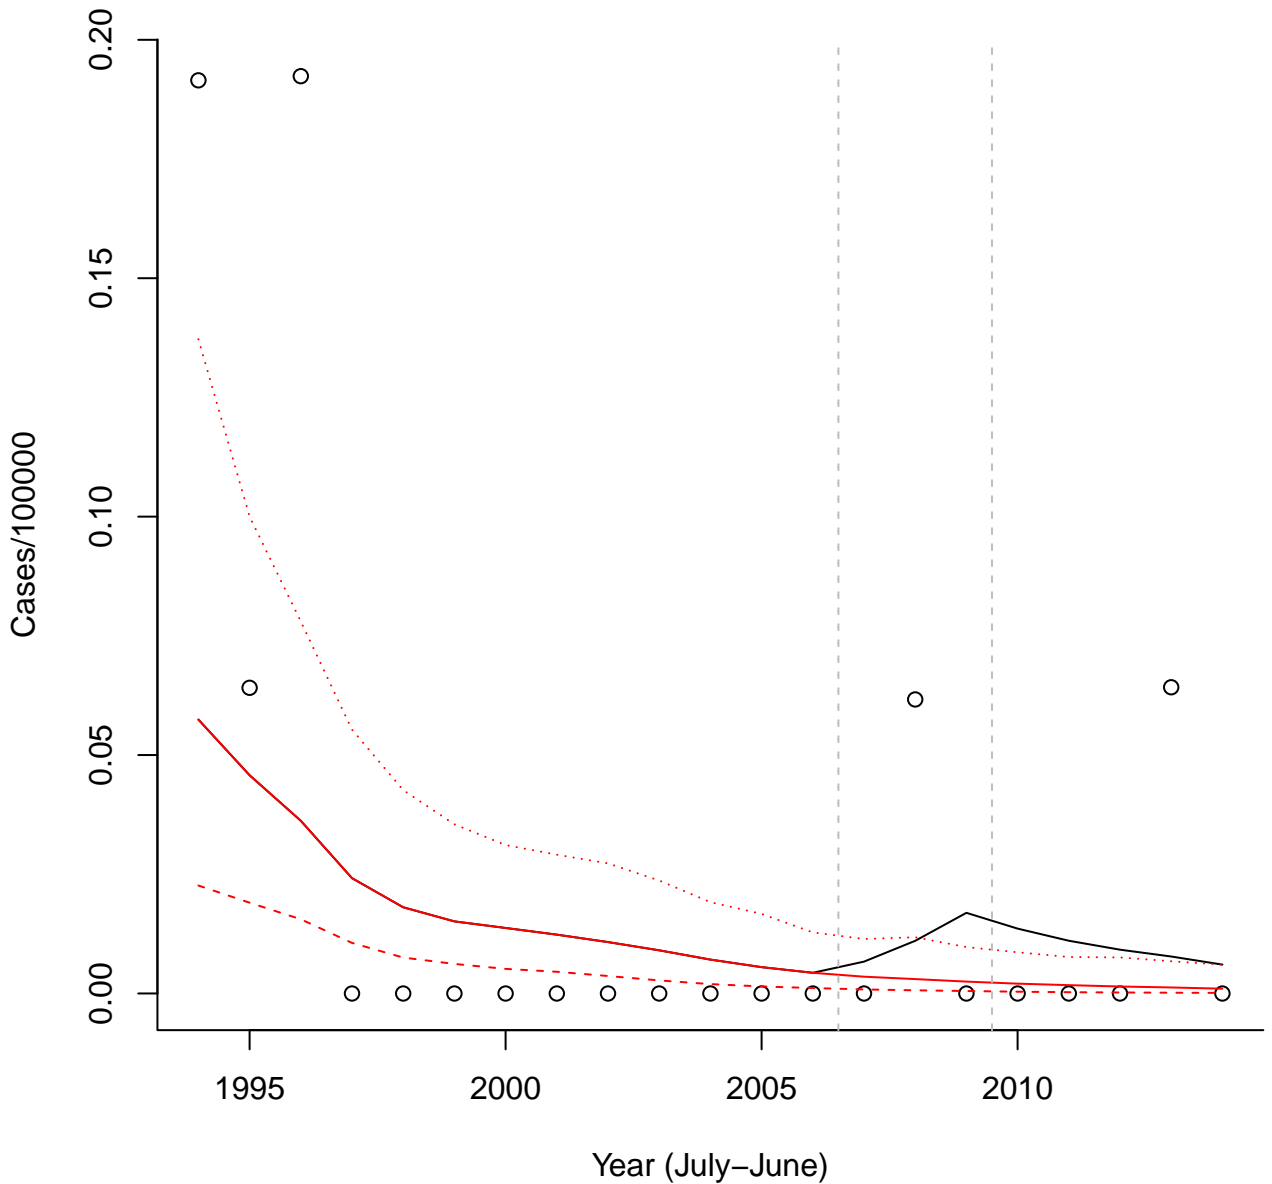



# 40-64y Without comorbidity Serotype 20

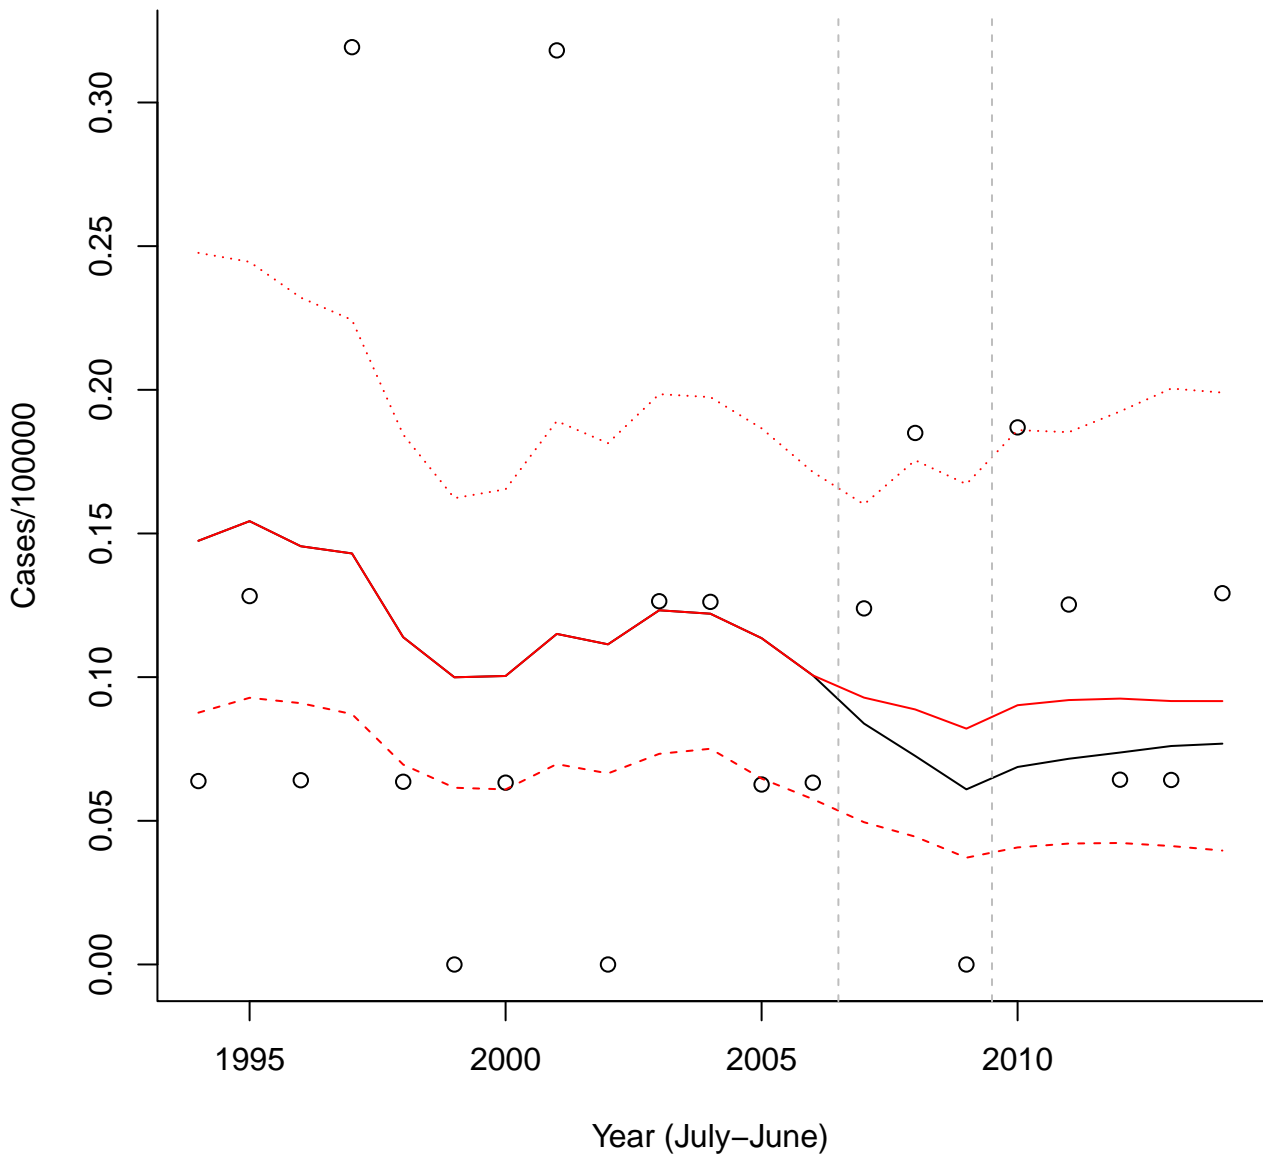

# 40–64y Without comorbidity Serotype 21

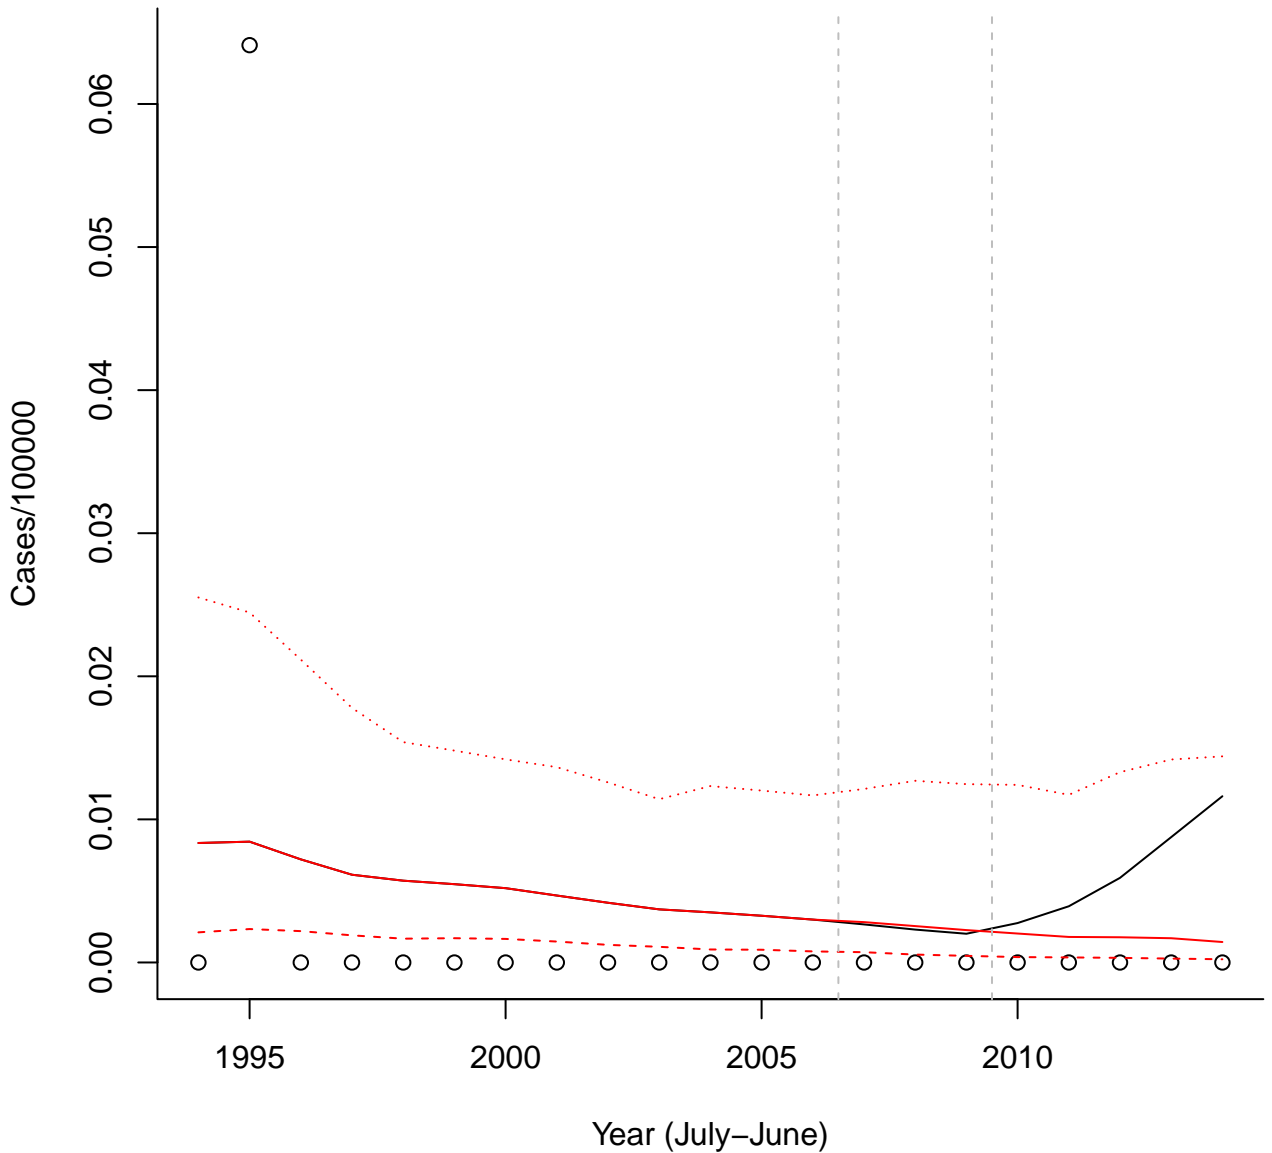

# 40-64y Without comorbidity Serotype 22A

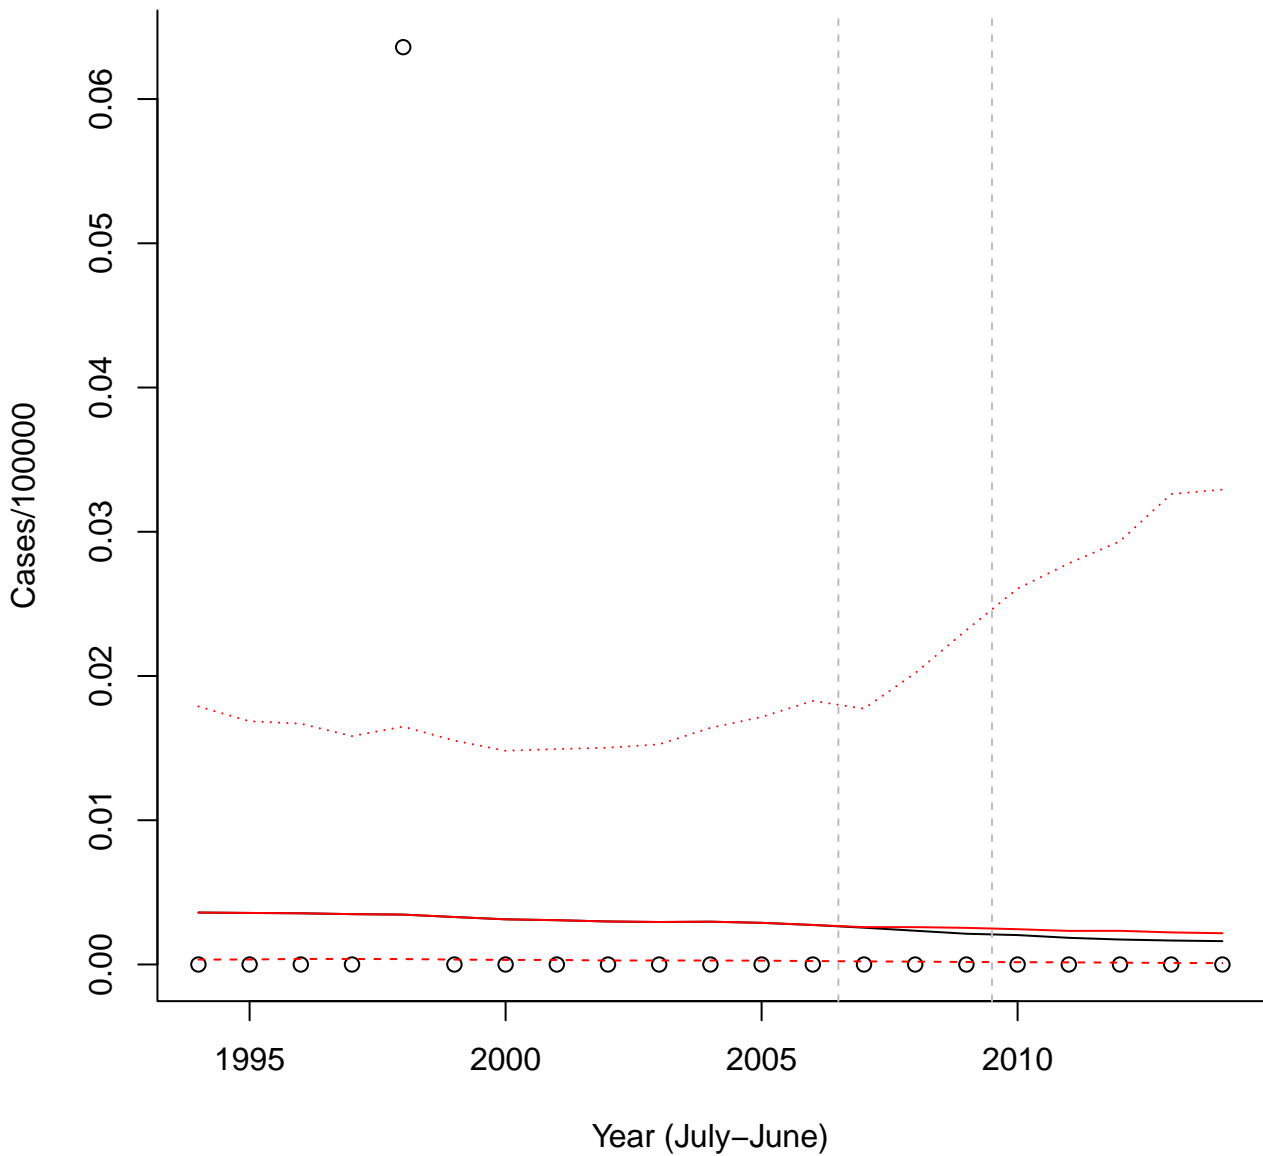

# 40-64y Without comorbidity Serotype 22F

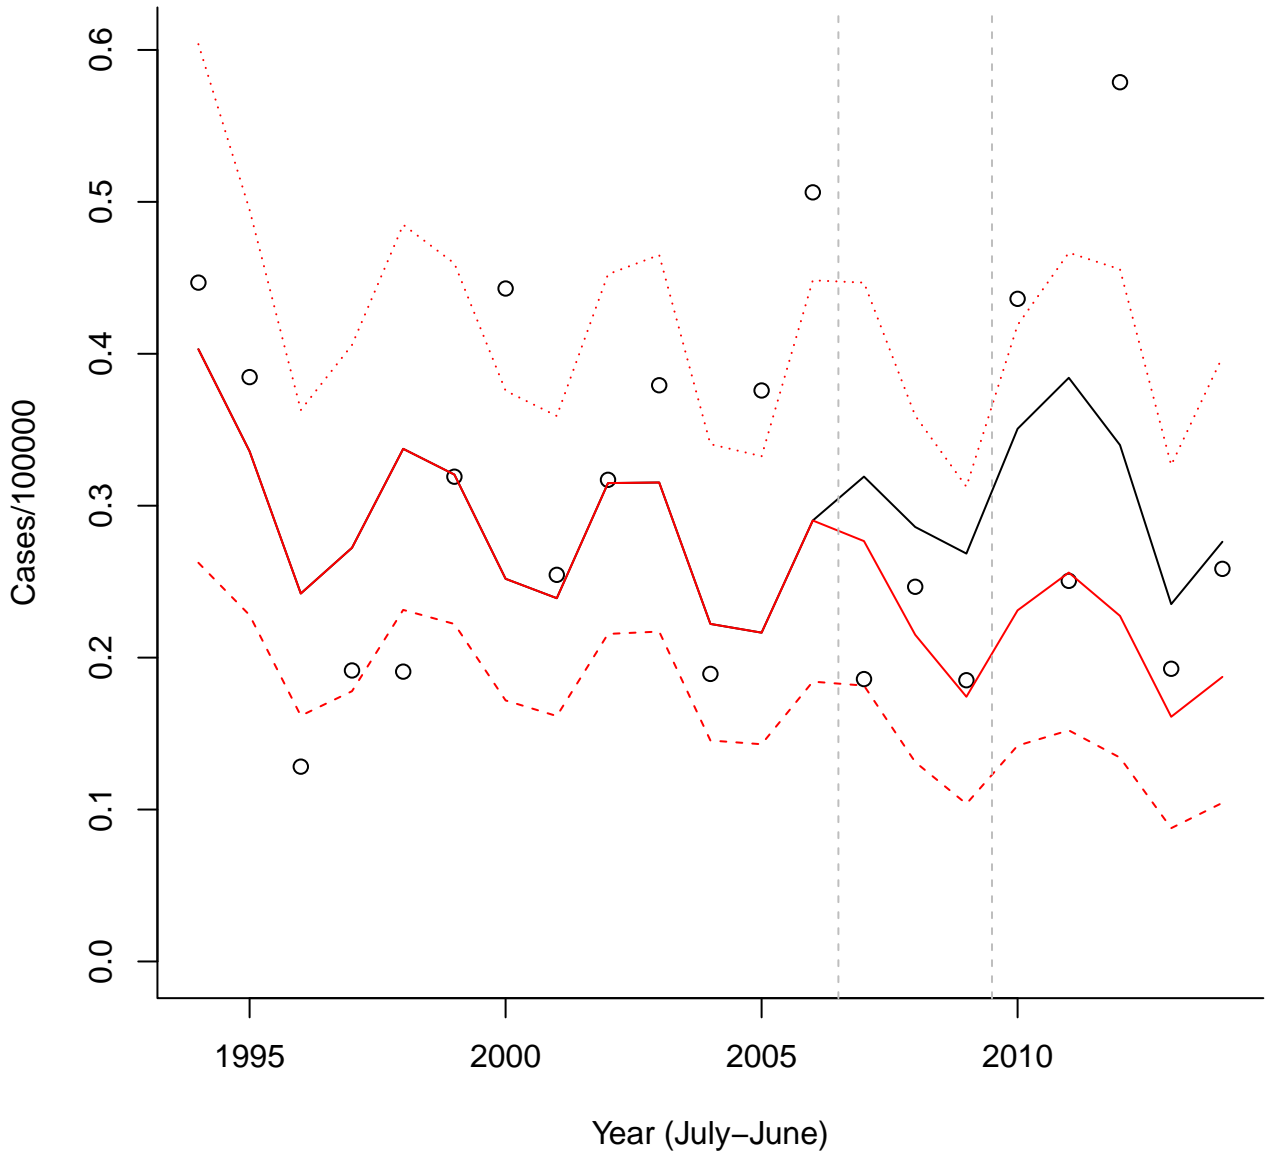

# 40-64y Without comorbidity Serotype 23A

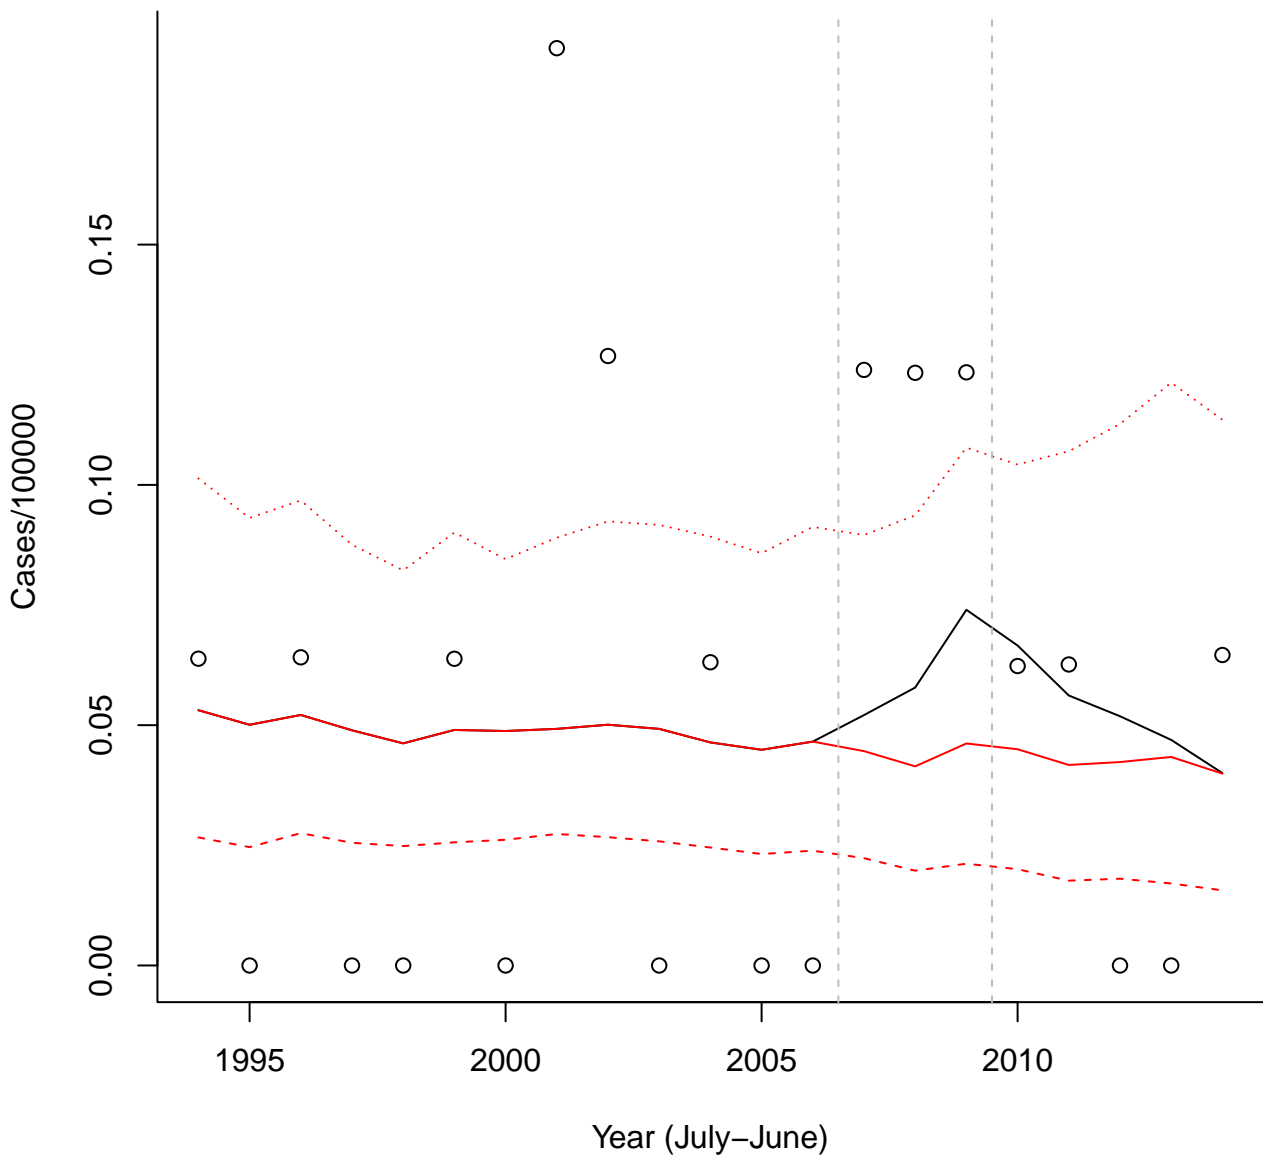

# 40-64y Without comorbidity Serotype 23B

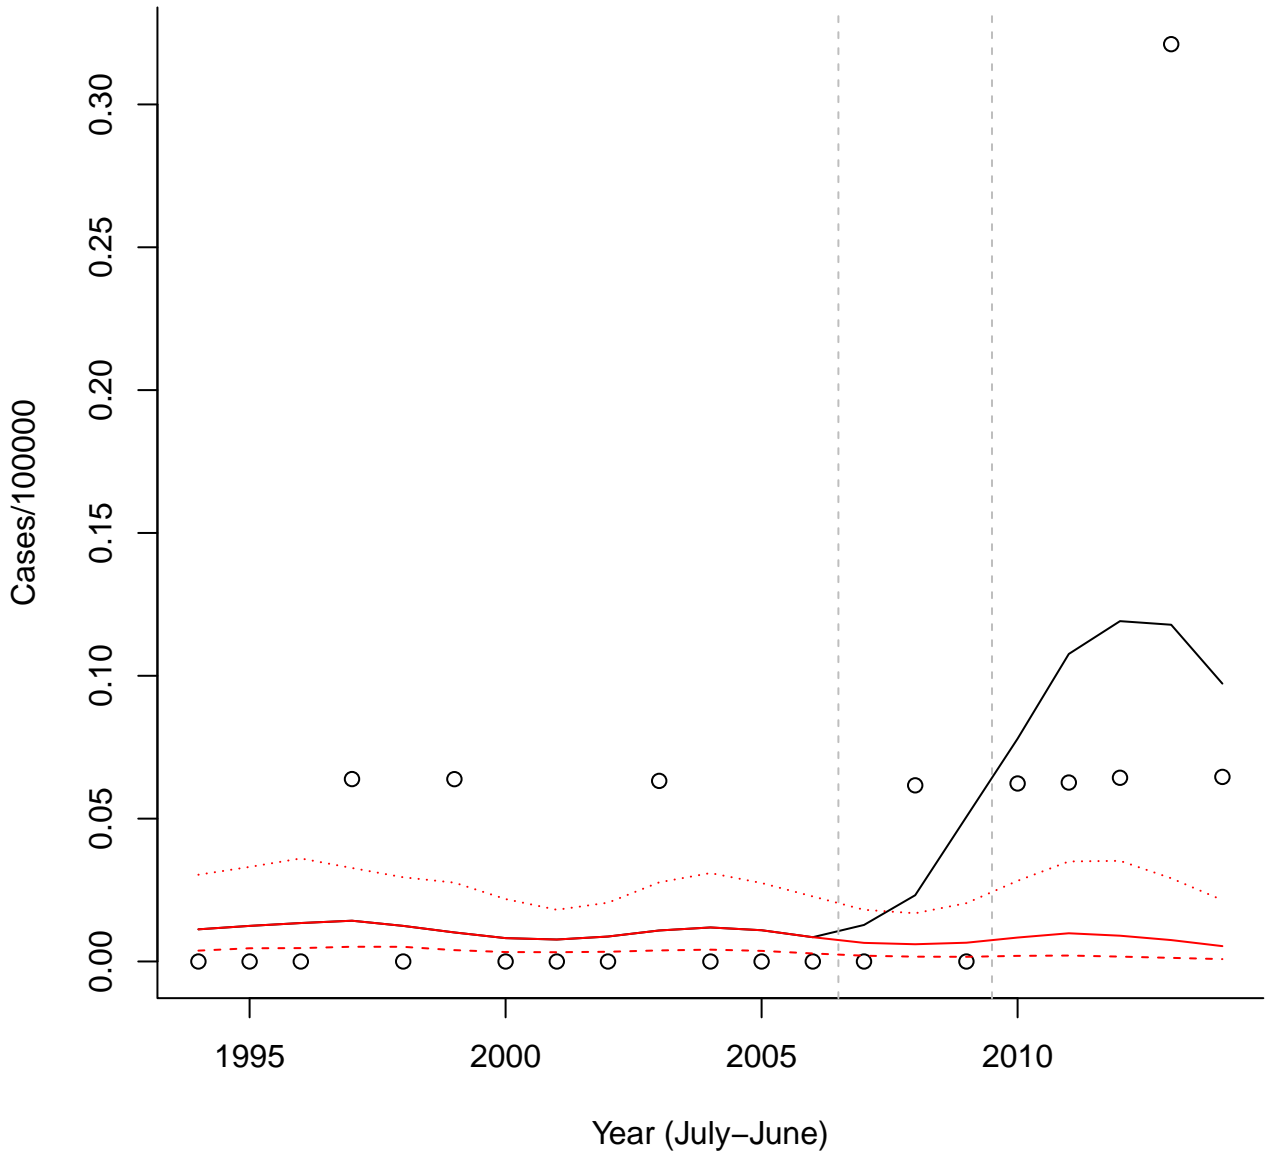

# 40-64y Without comorbidity Serotype 23F

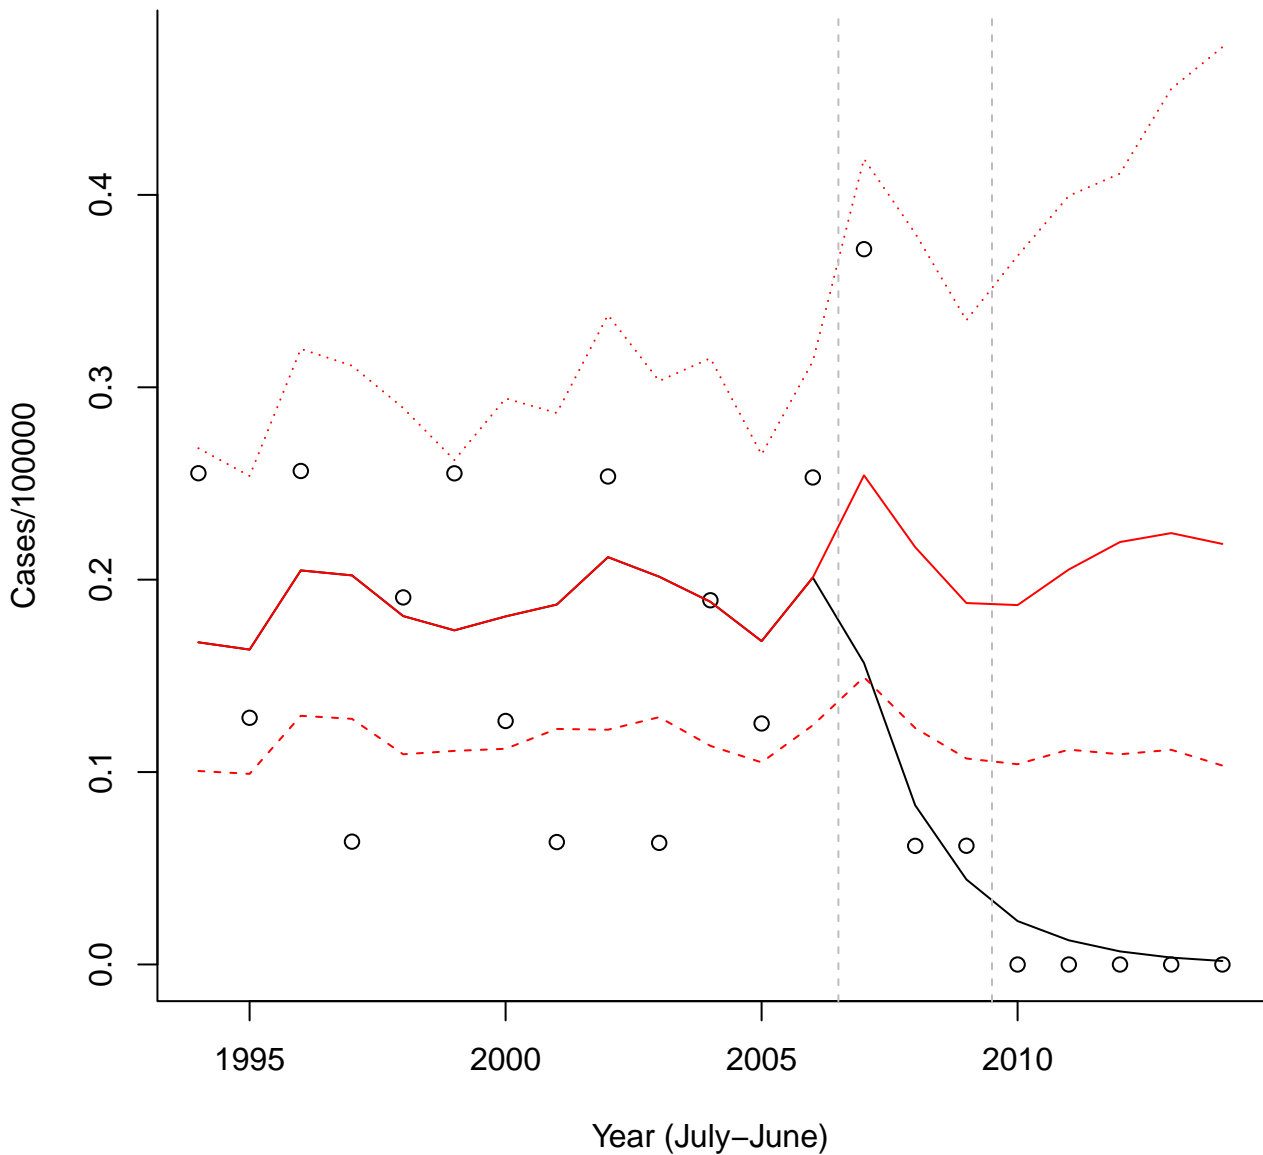

# 40-64y Without comorbidity Serotype 24B

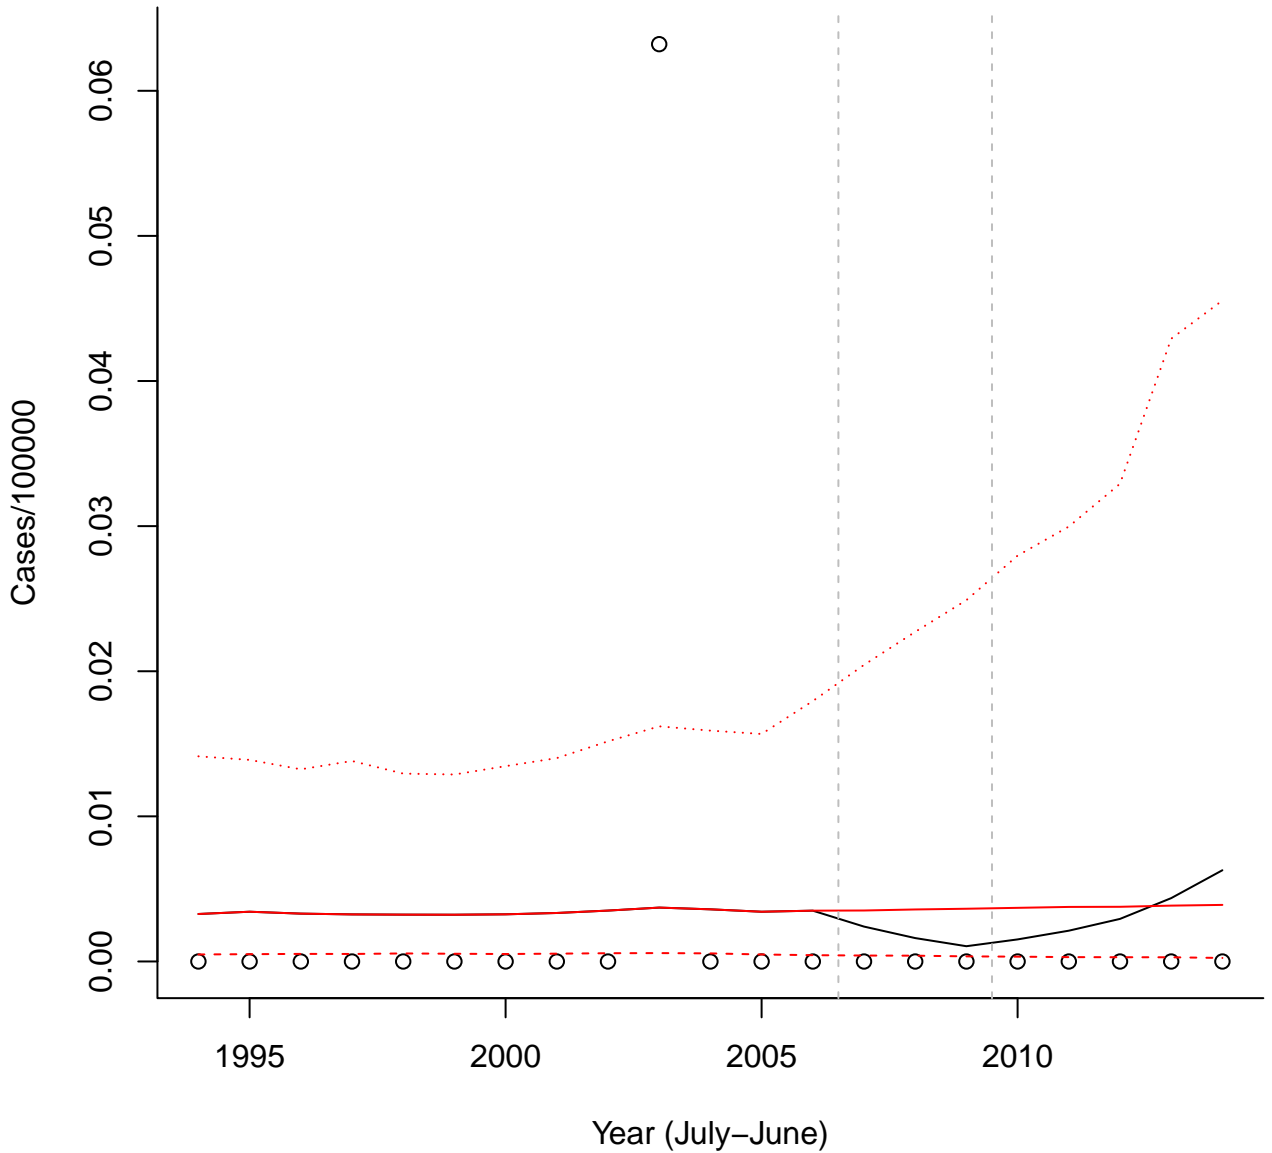



# 40-64y Without comorbidity Serotype 24F

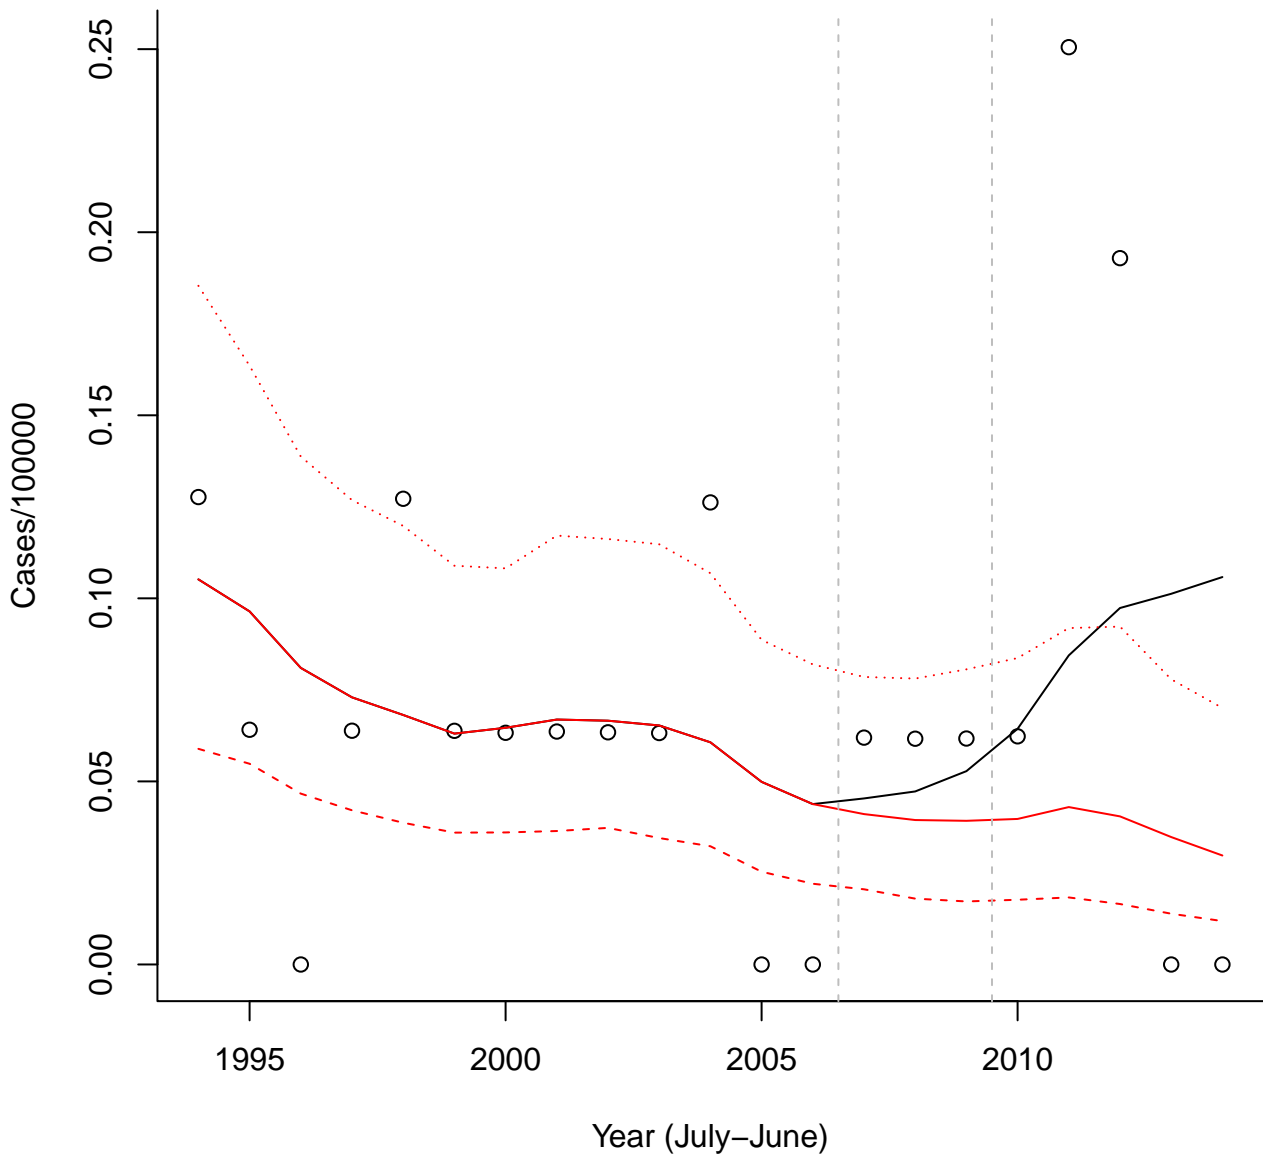

# 40–64y Without comorbidity Serotype 25A

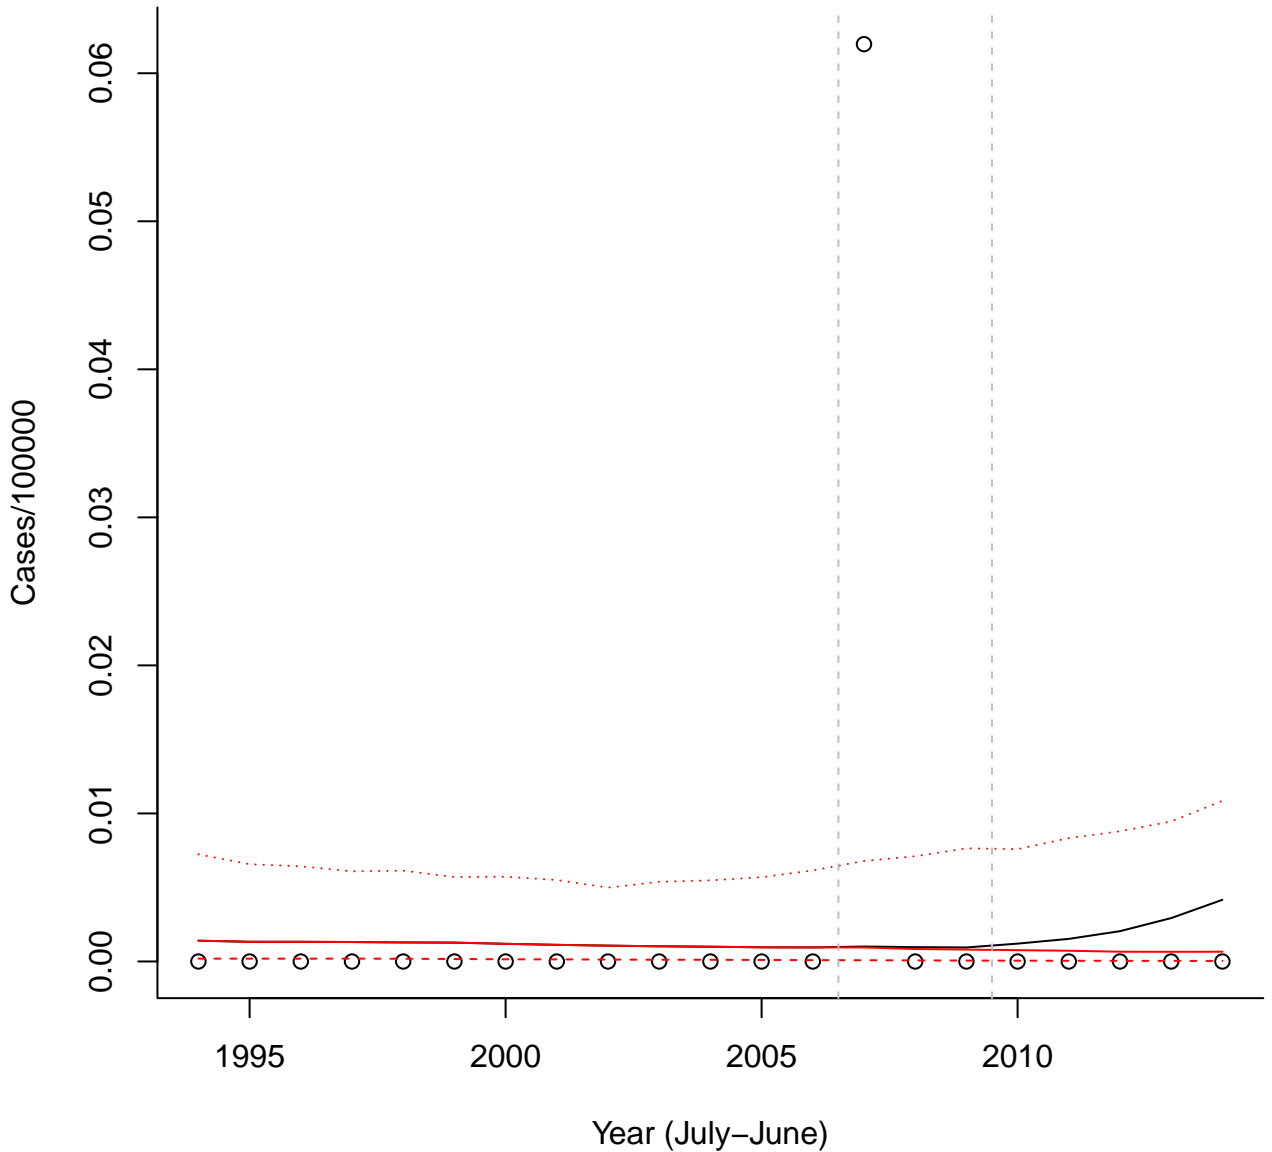

# 40-64y Without comorbidity Serotype 28F

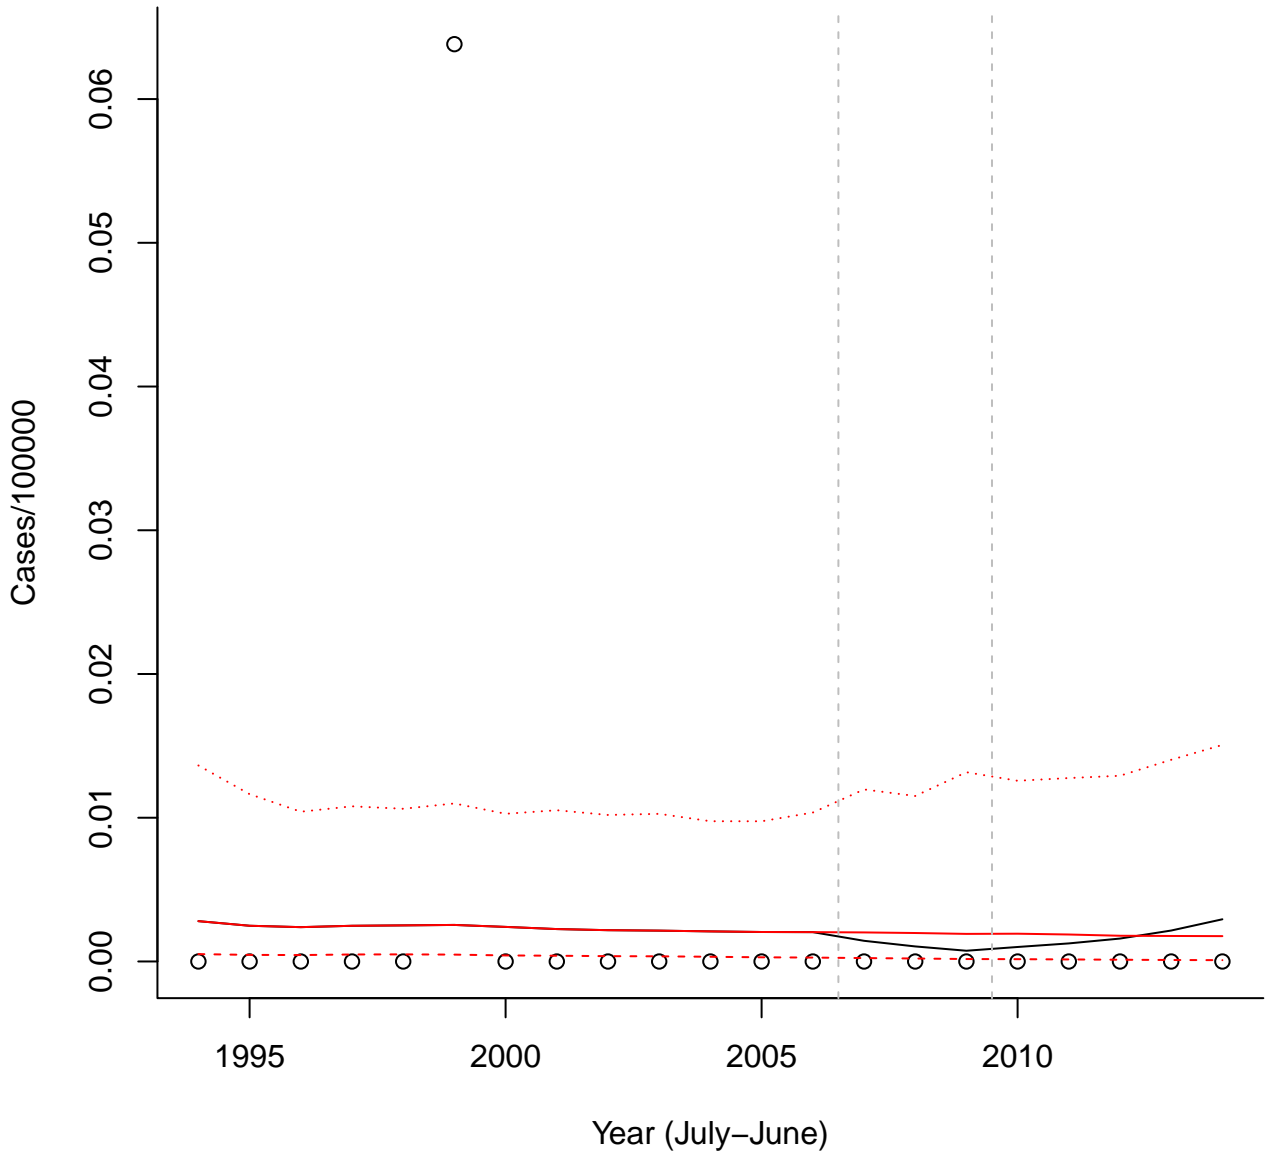

### 40–64y Without comorbidity Serotype 3

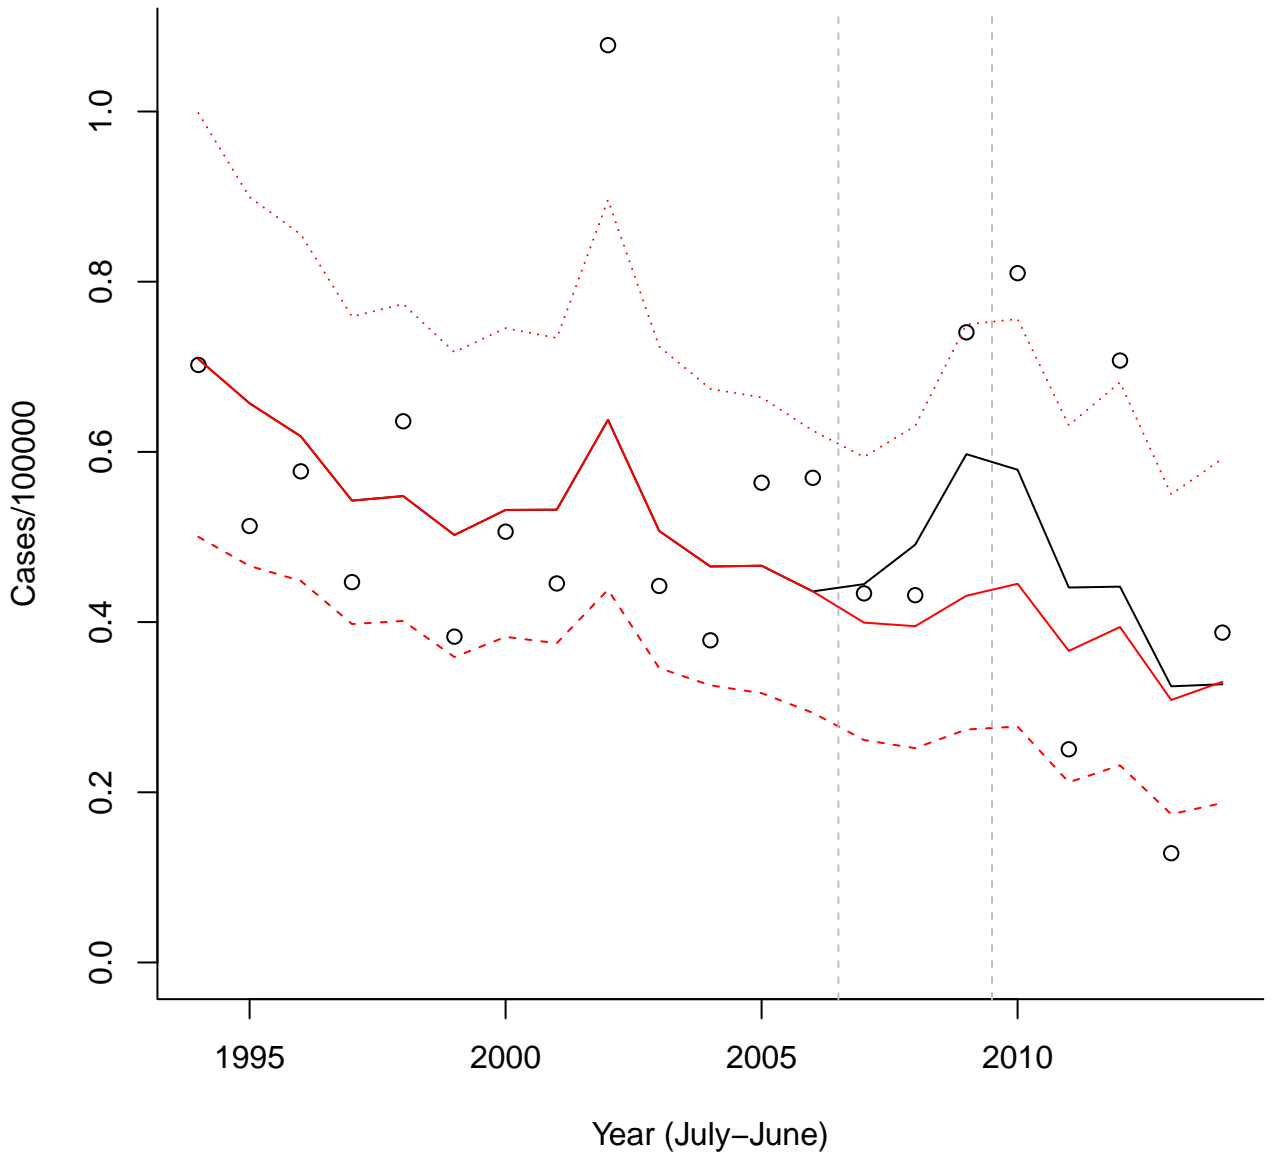

# 40–64y Without comorbidity Serotype 31

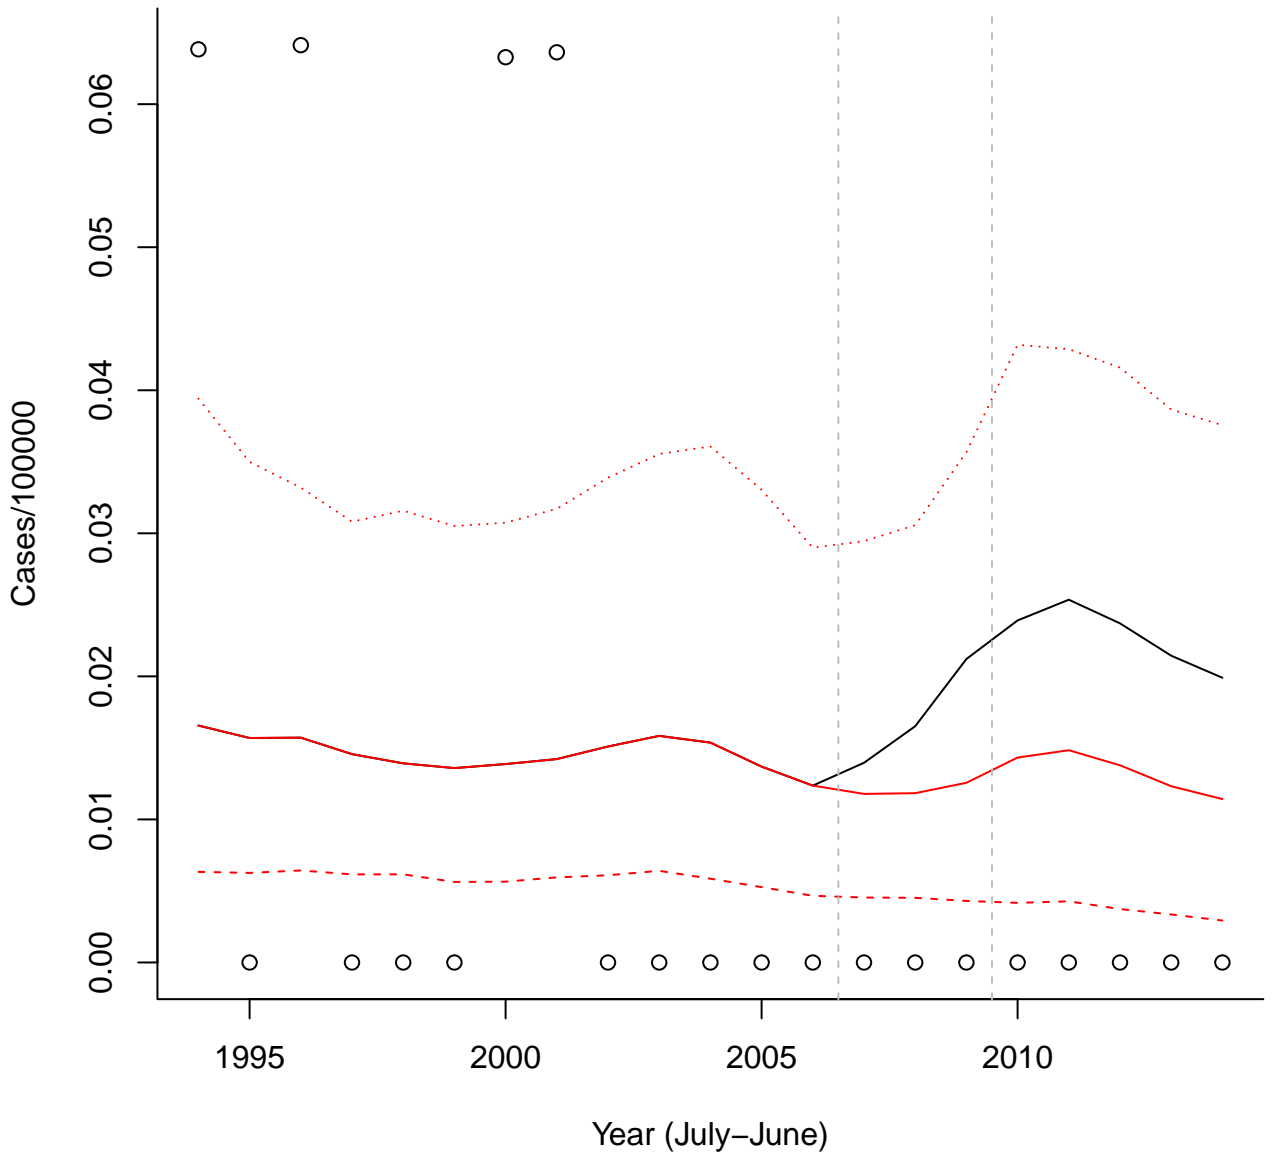

# 40-64y Without comorbidity Serotype 33F

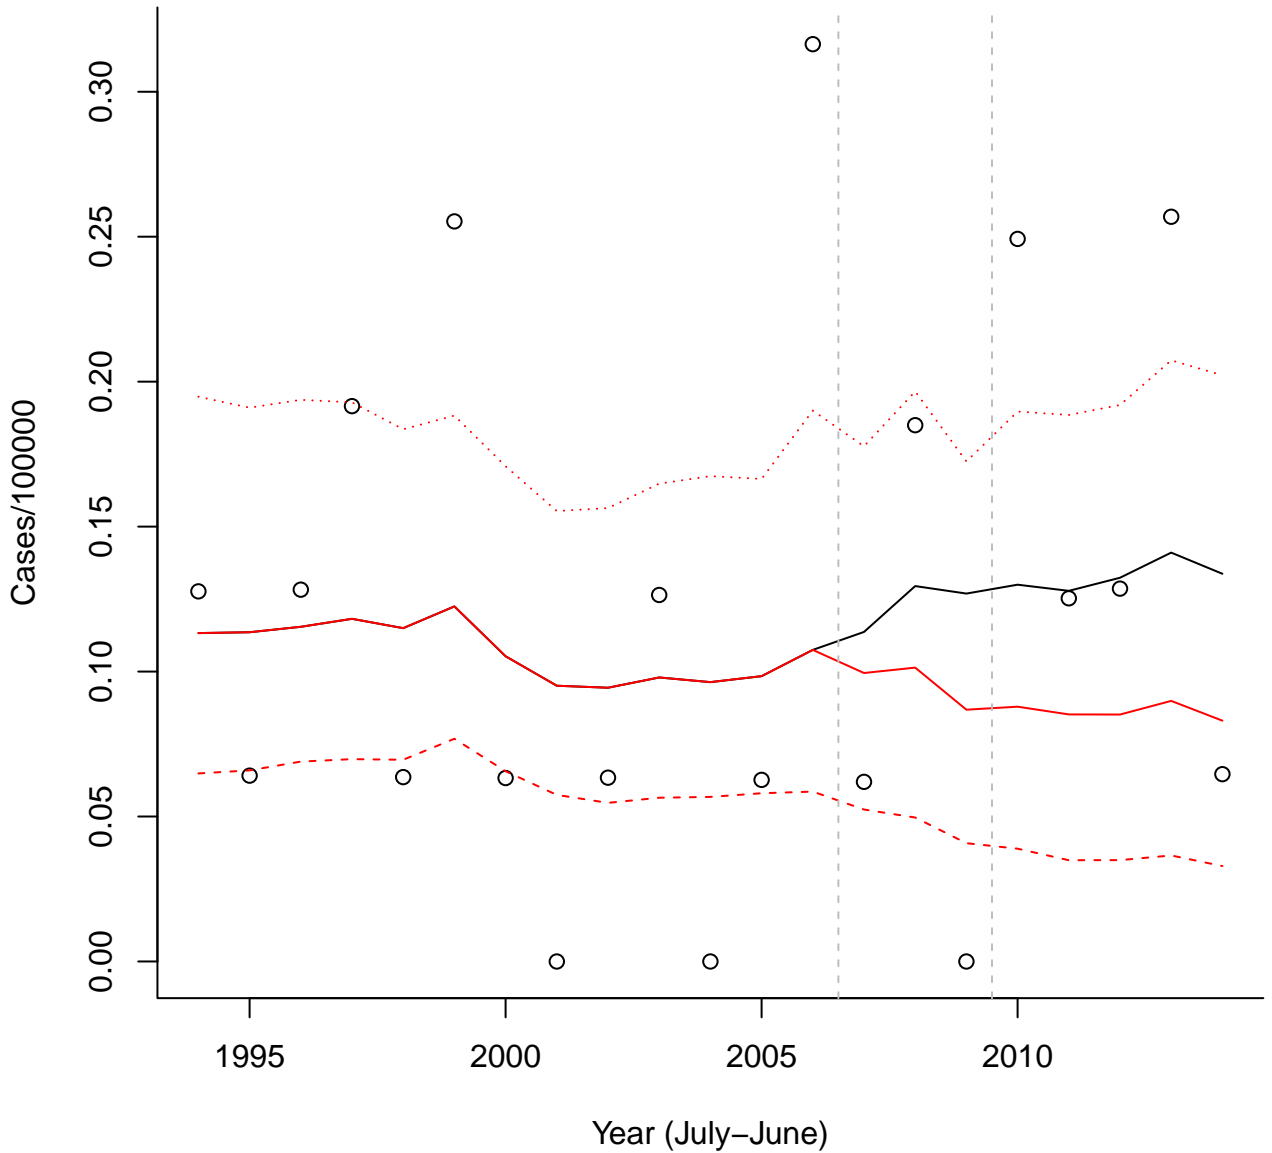

# 40–64y Without comorbidity Serotype 34

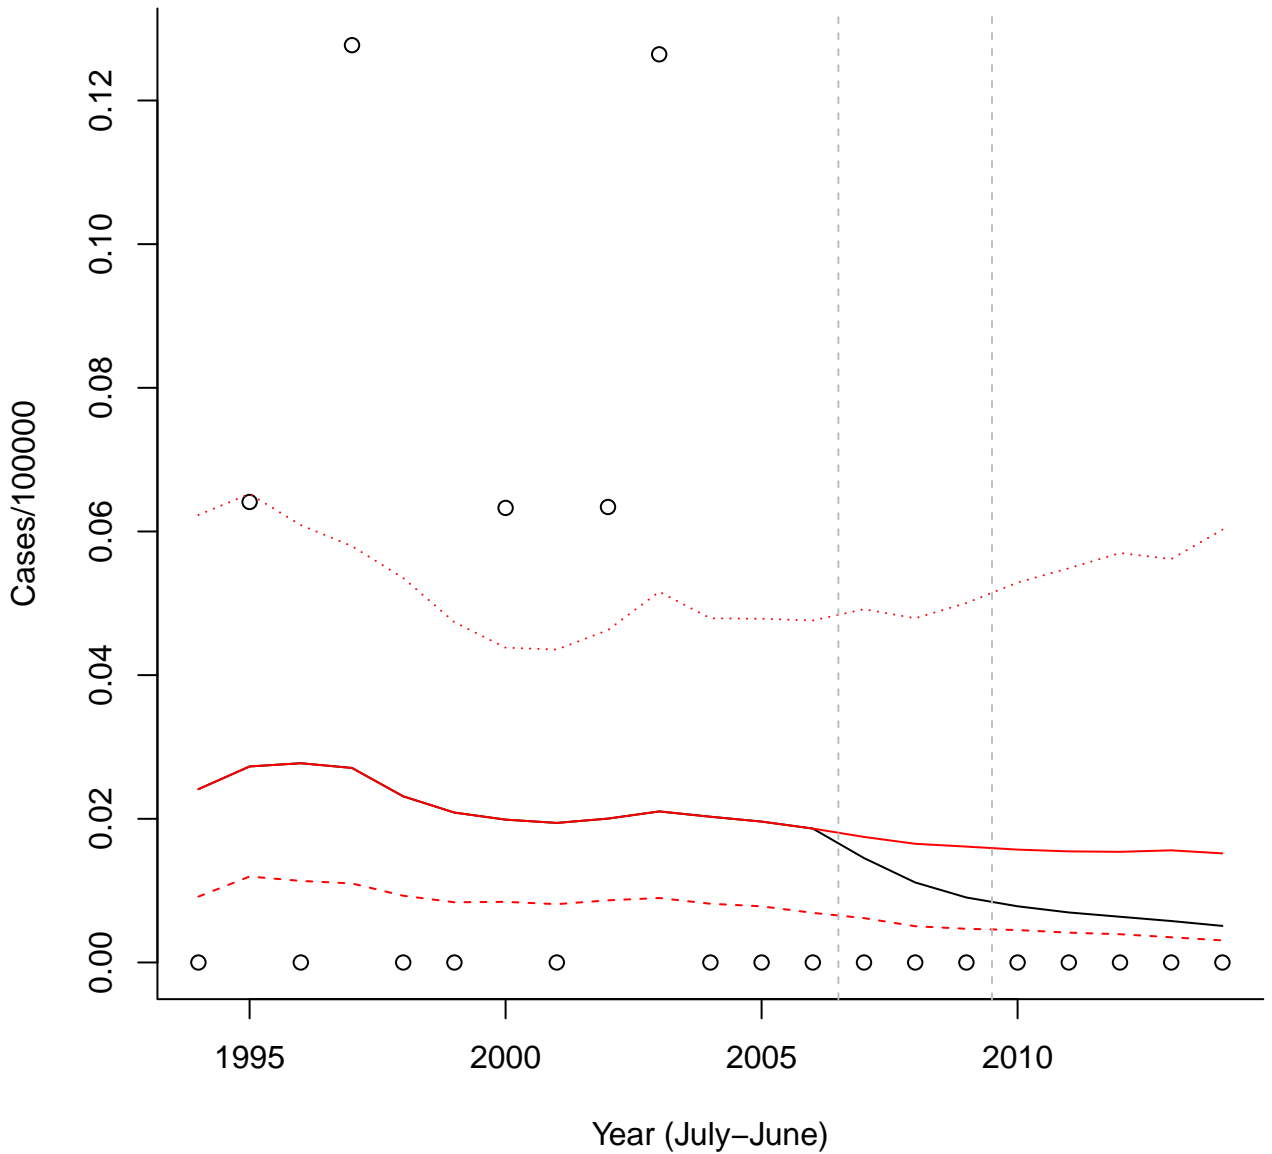

# 40-64y Without comorbidity Serotype 35B

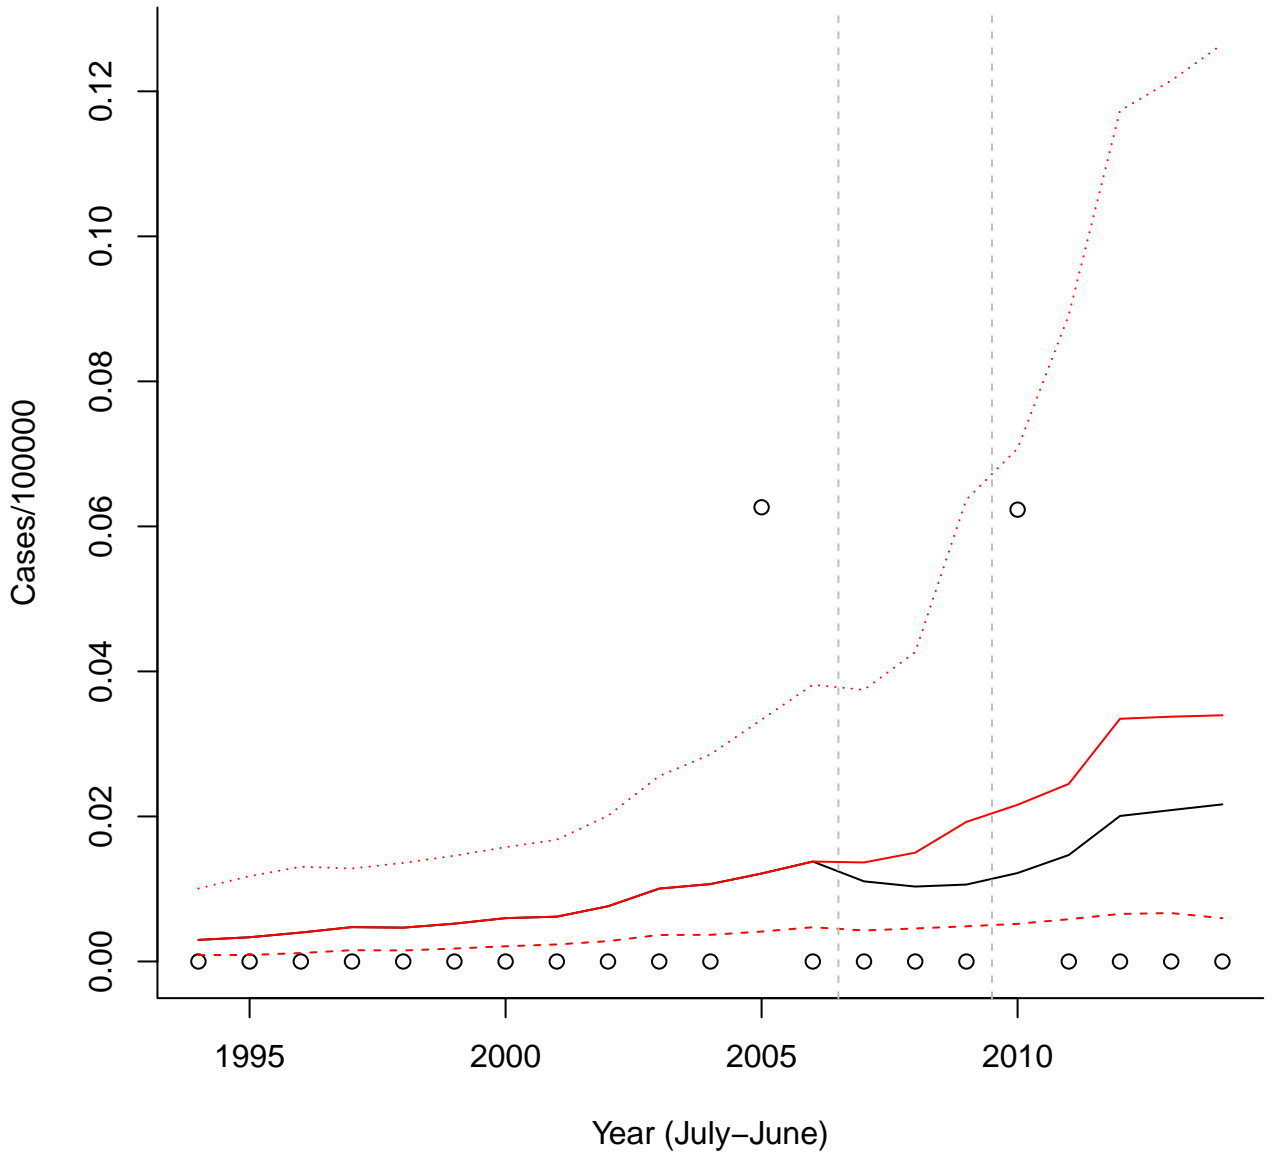



# 40-64y Without comorbidity Serotype 35F

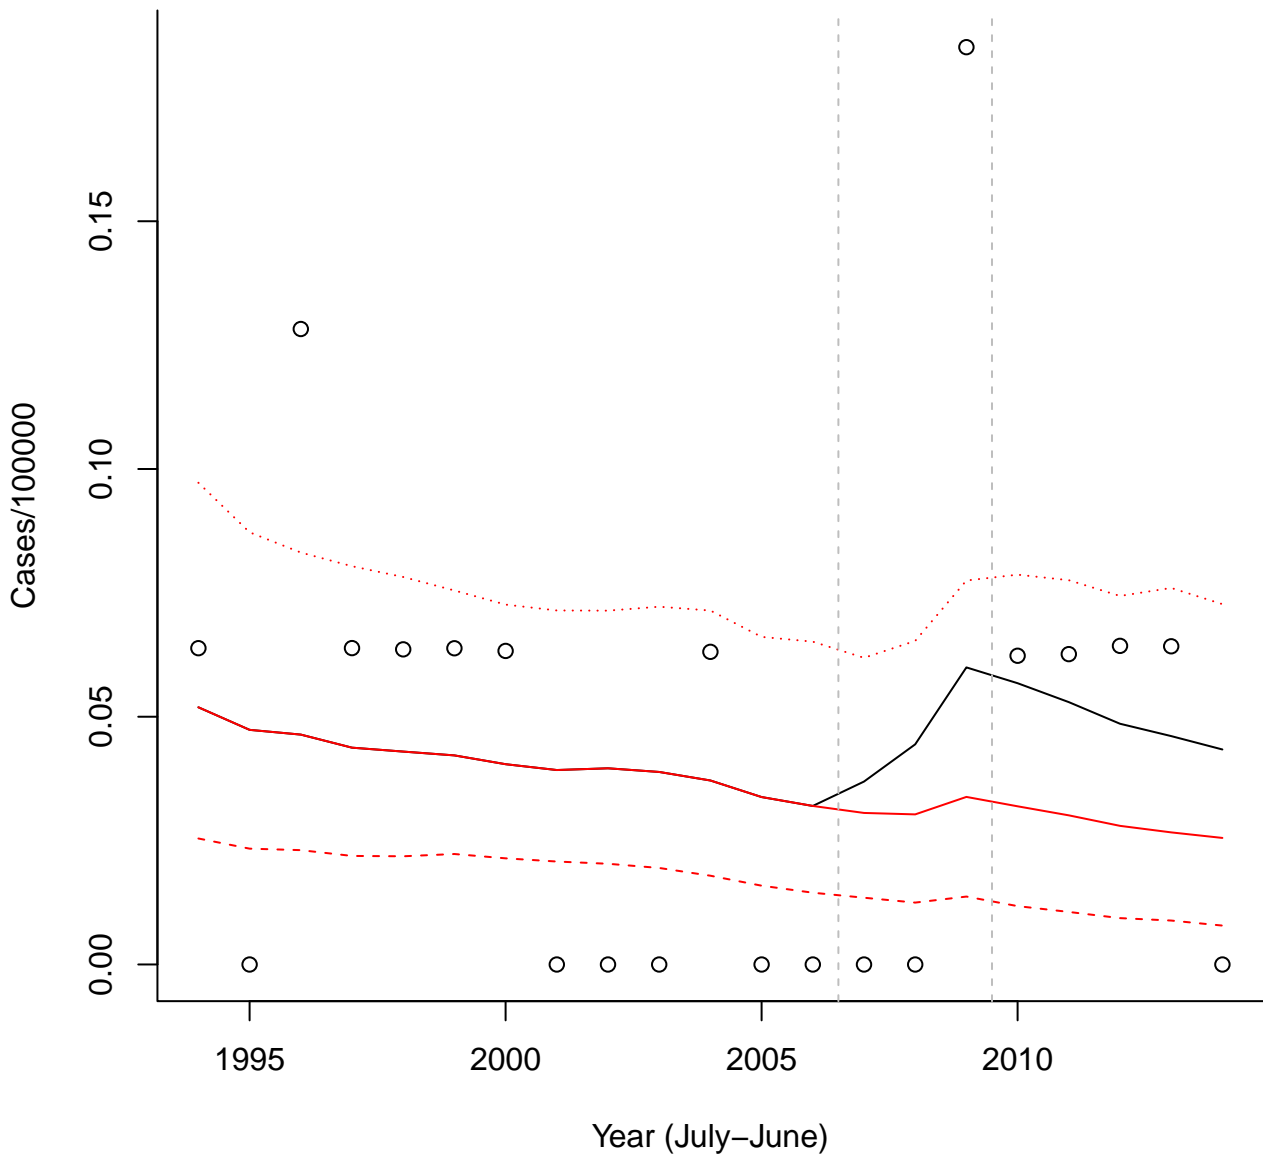

# 40–64y Without comorbidity Serotype 37

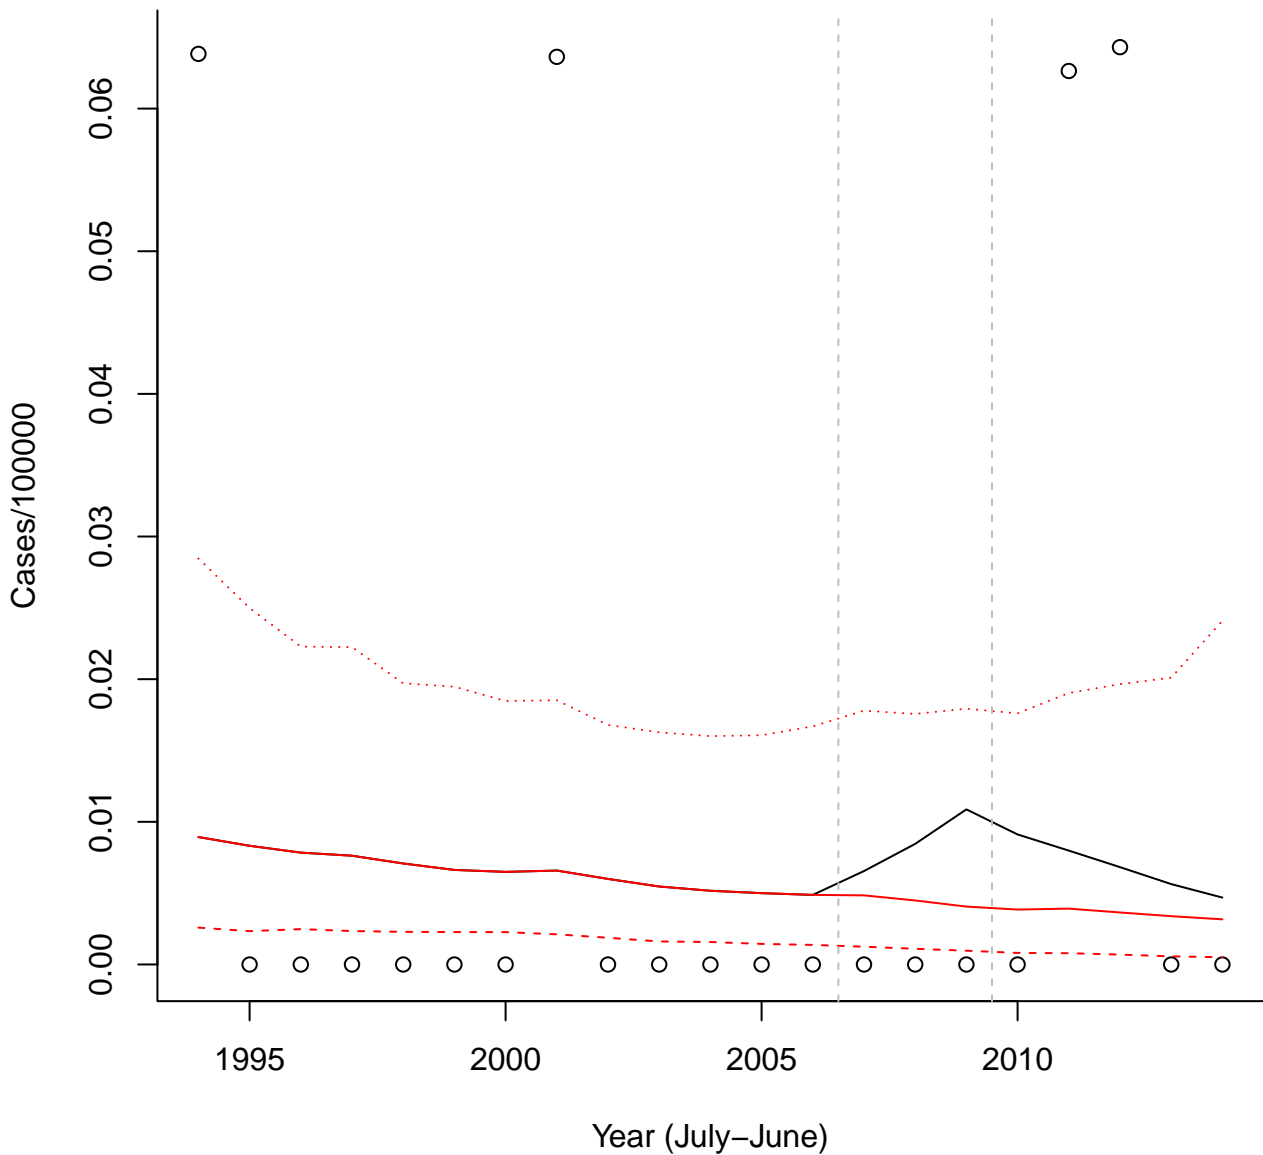

# 40–64y Without comorbidity Serotype 38

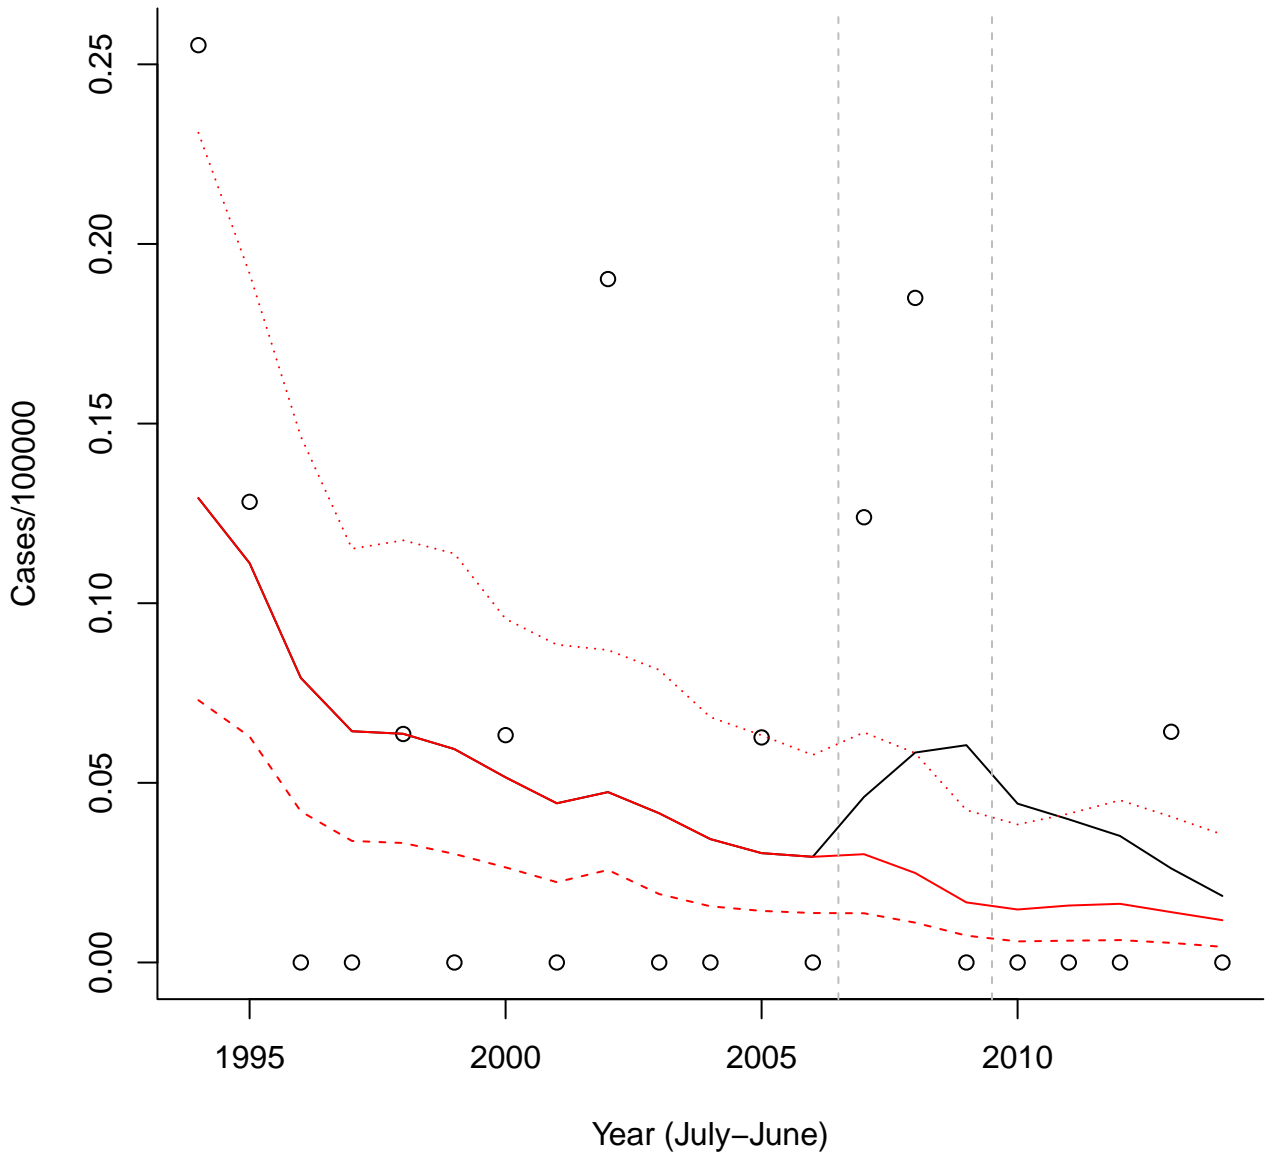

# 40–64y Without comorbidity Serotype 4

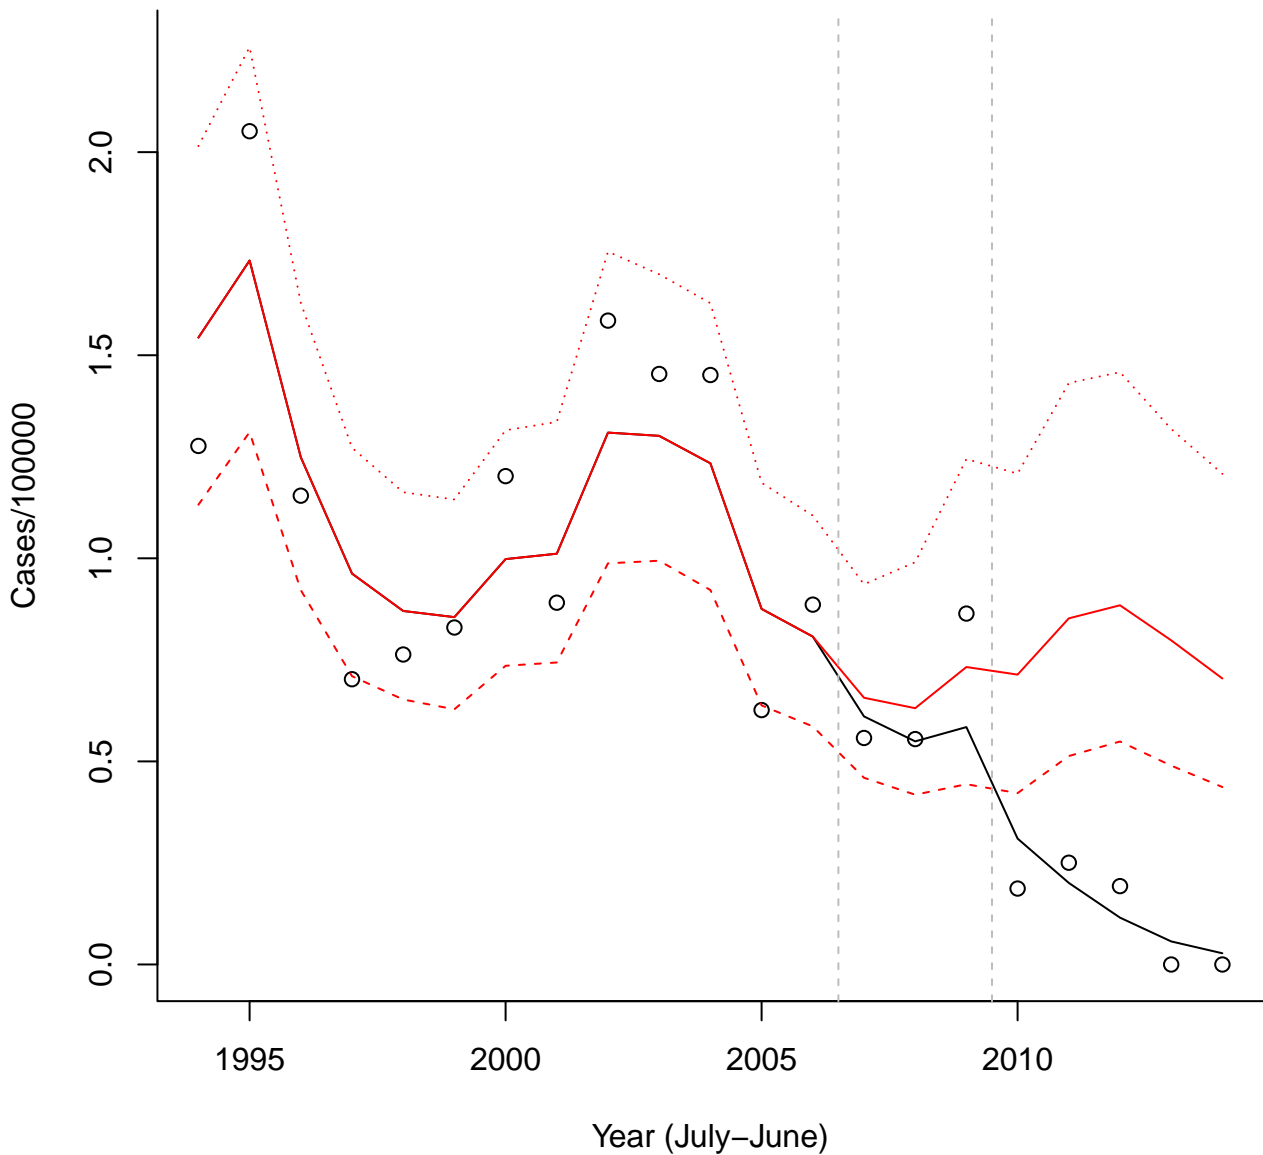

# 40–64y Without comorbidity Serotype 42

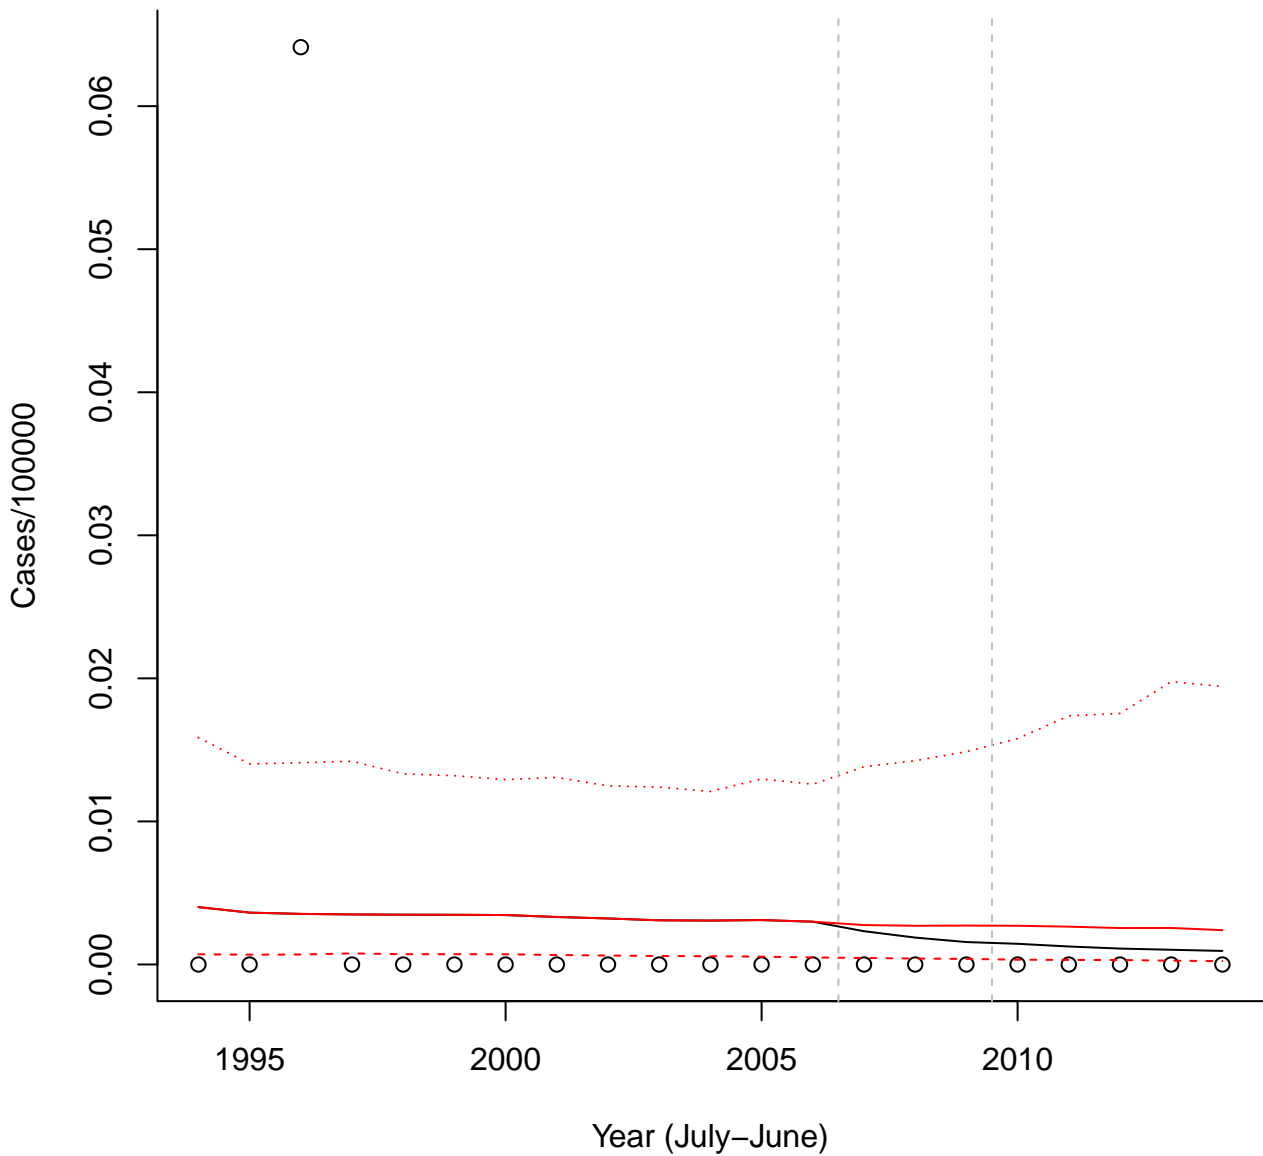

# 40–64y Without comorbidity Serotype 5

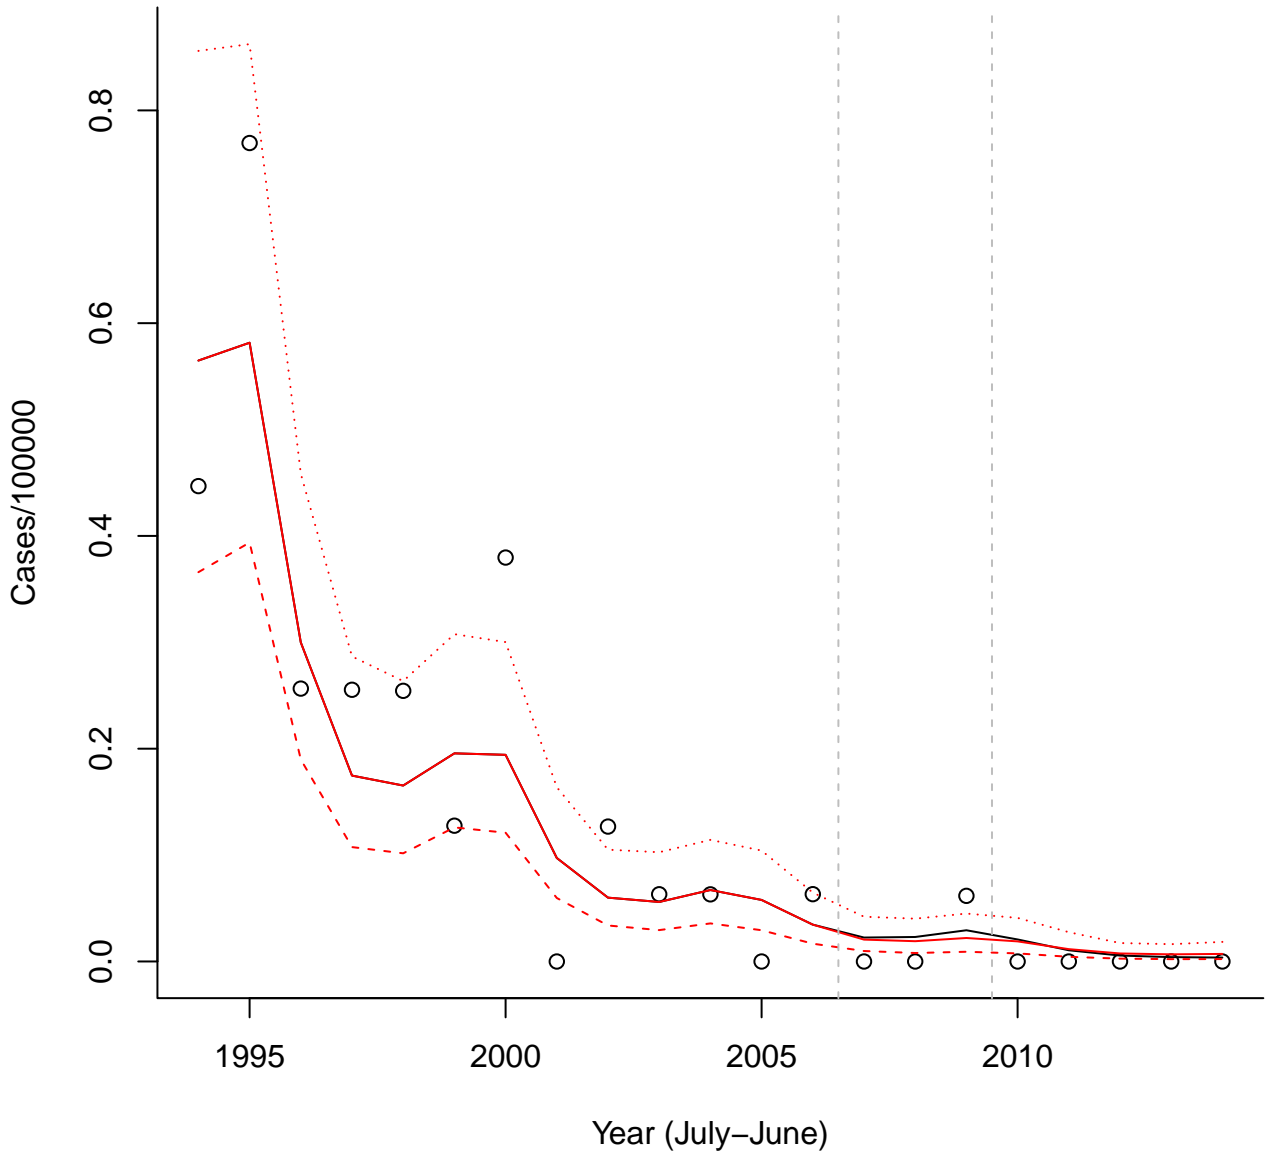

# 40–64y Without comorbidity Serotype 6A

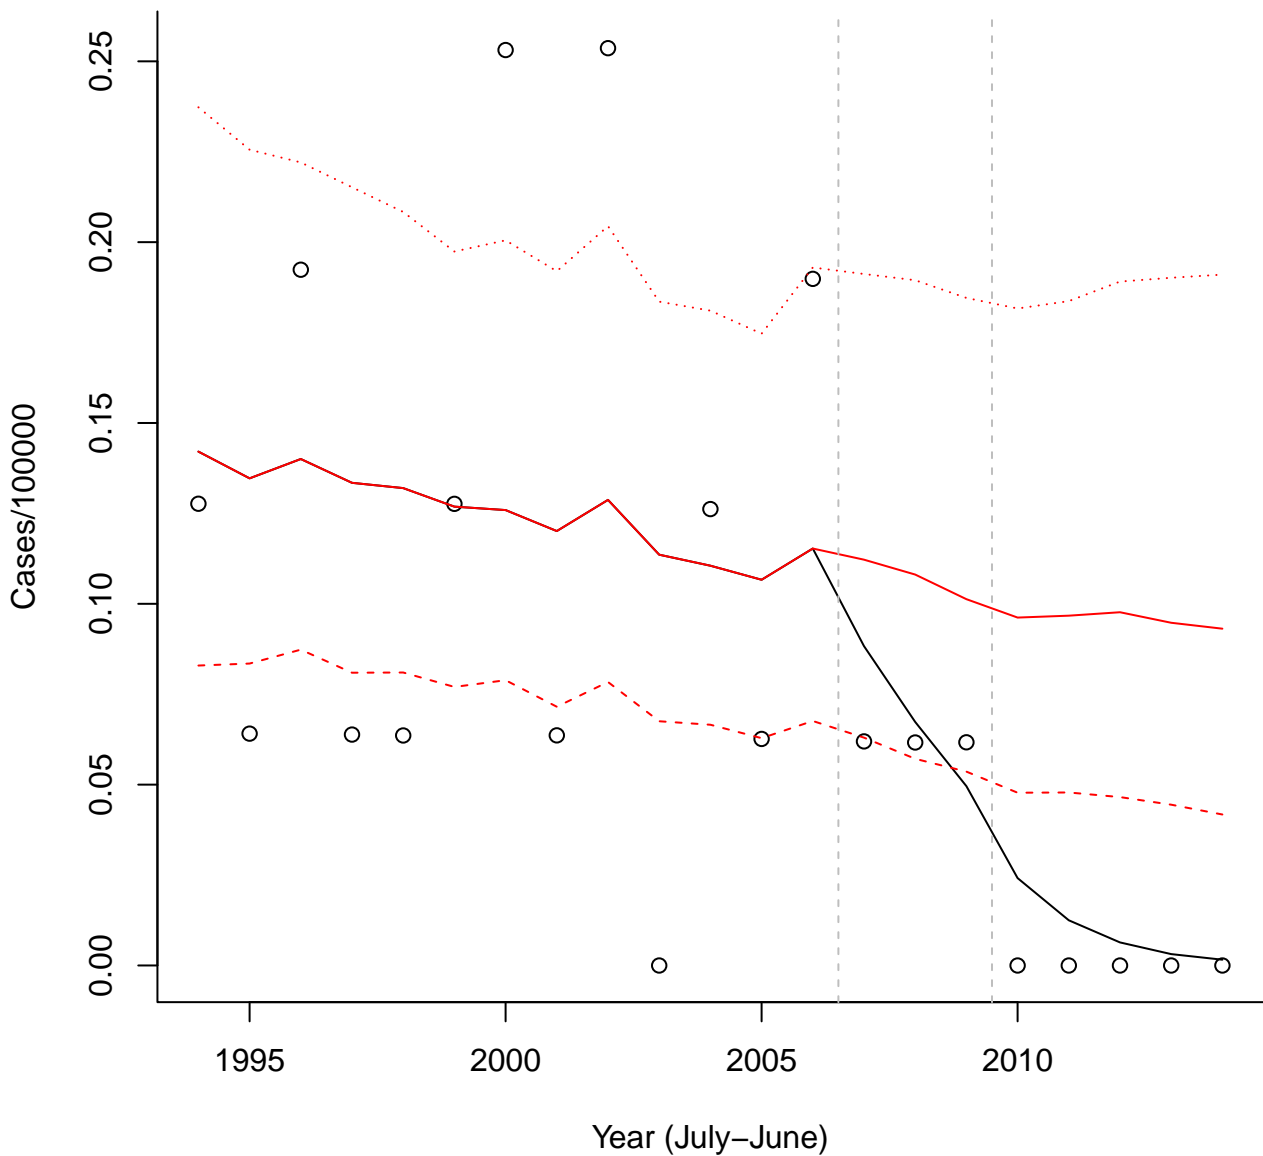

# 40–64y Without comorbidity Serotype 6B

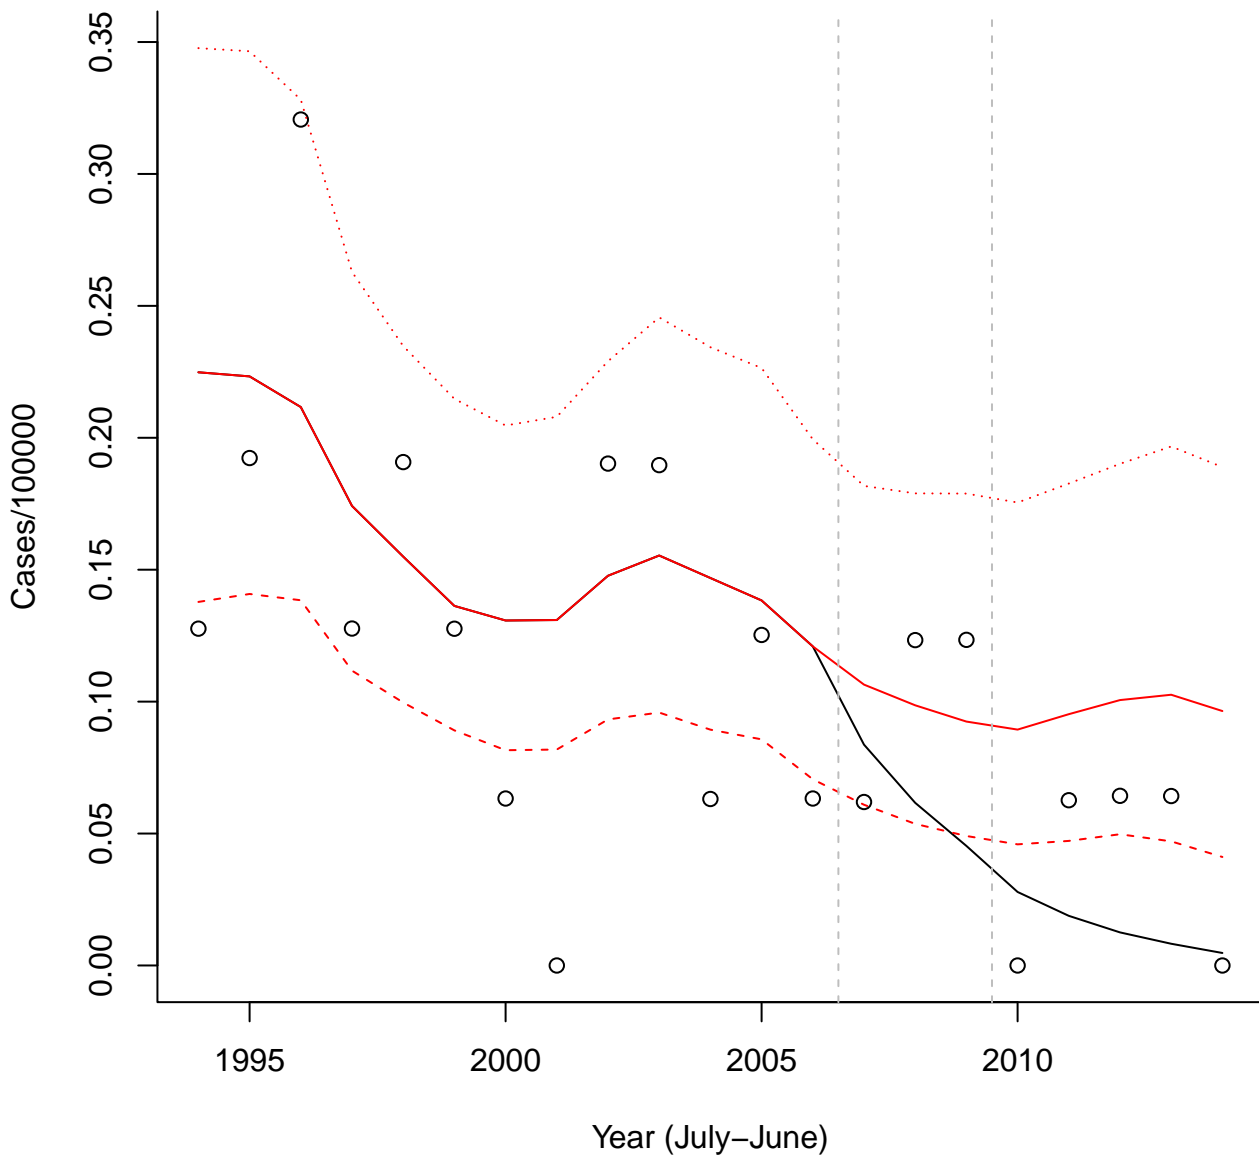



# 40–64y Without comorbidity Serotype 6C

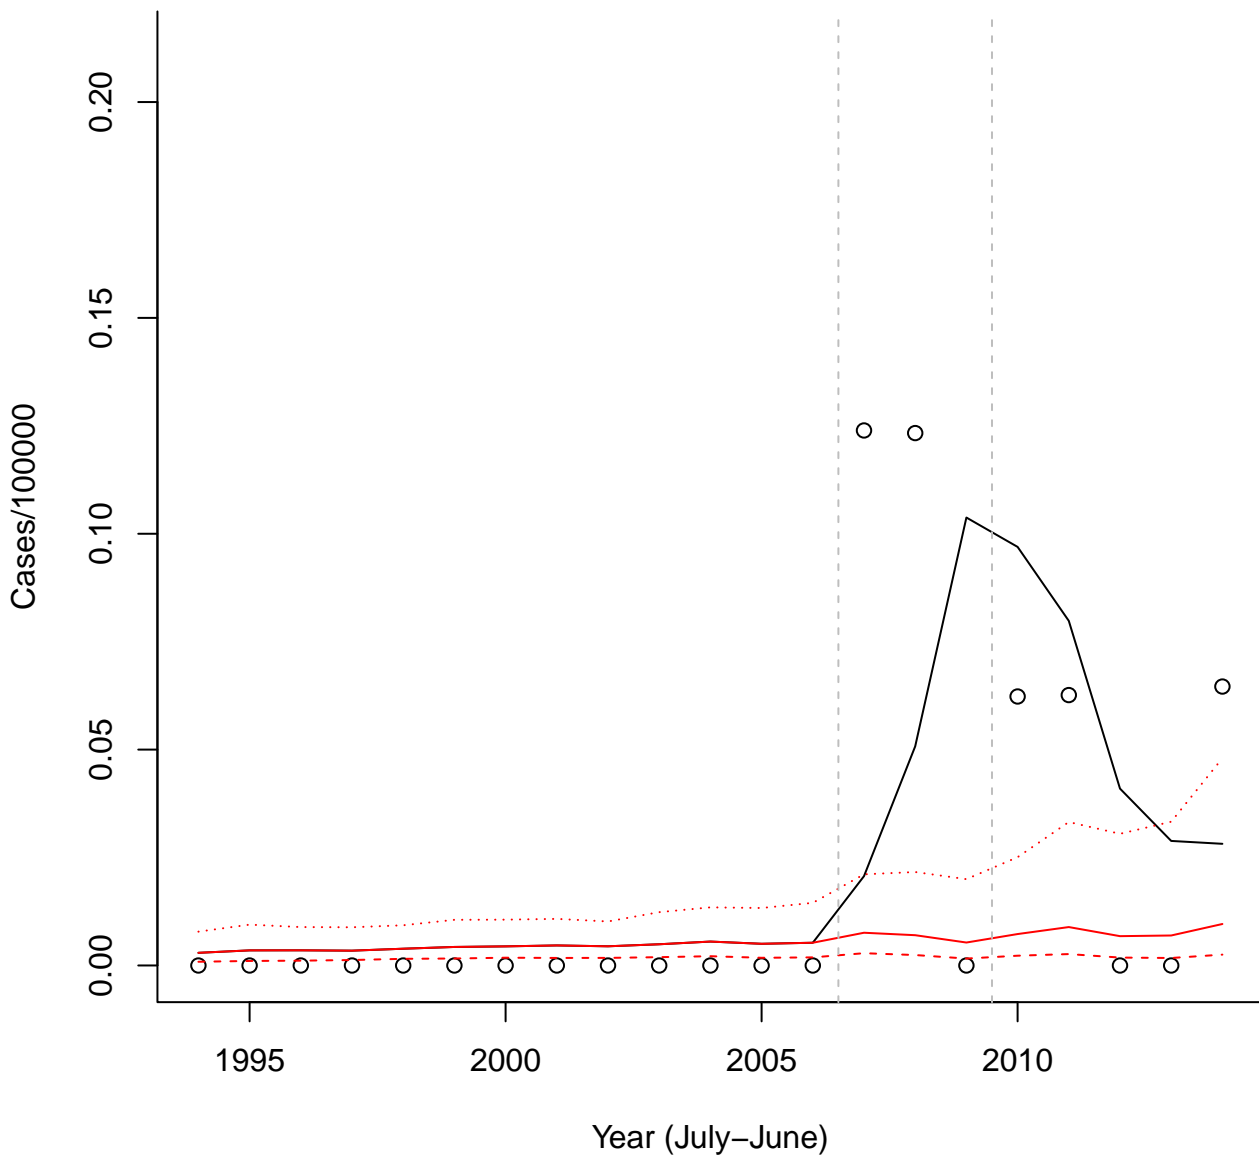

# 40-64y Without comorbidity Serotype 7C

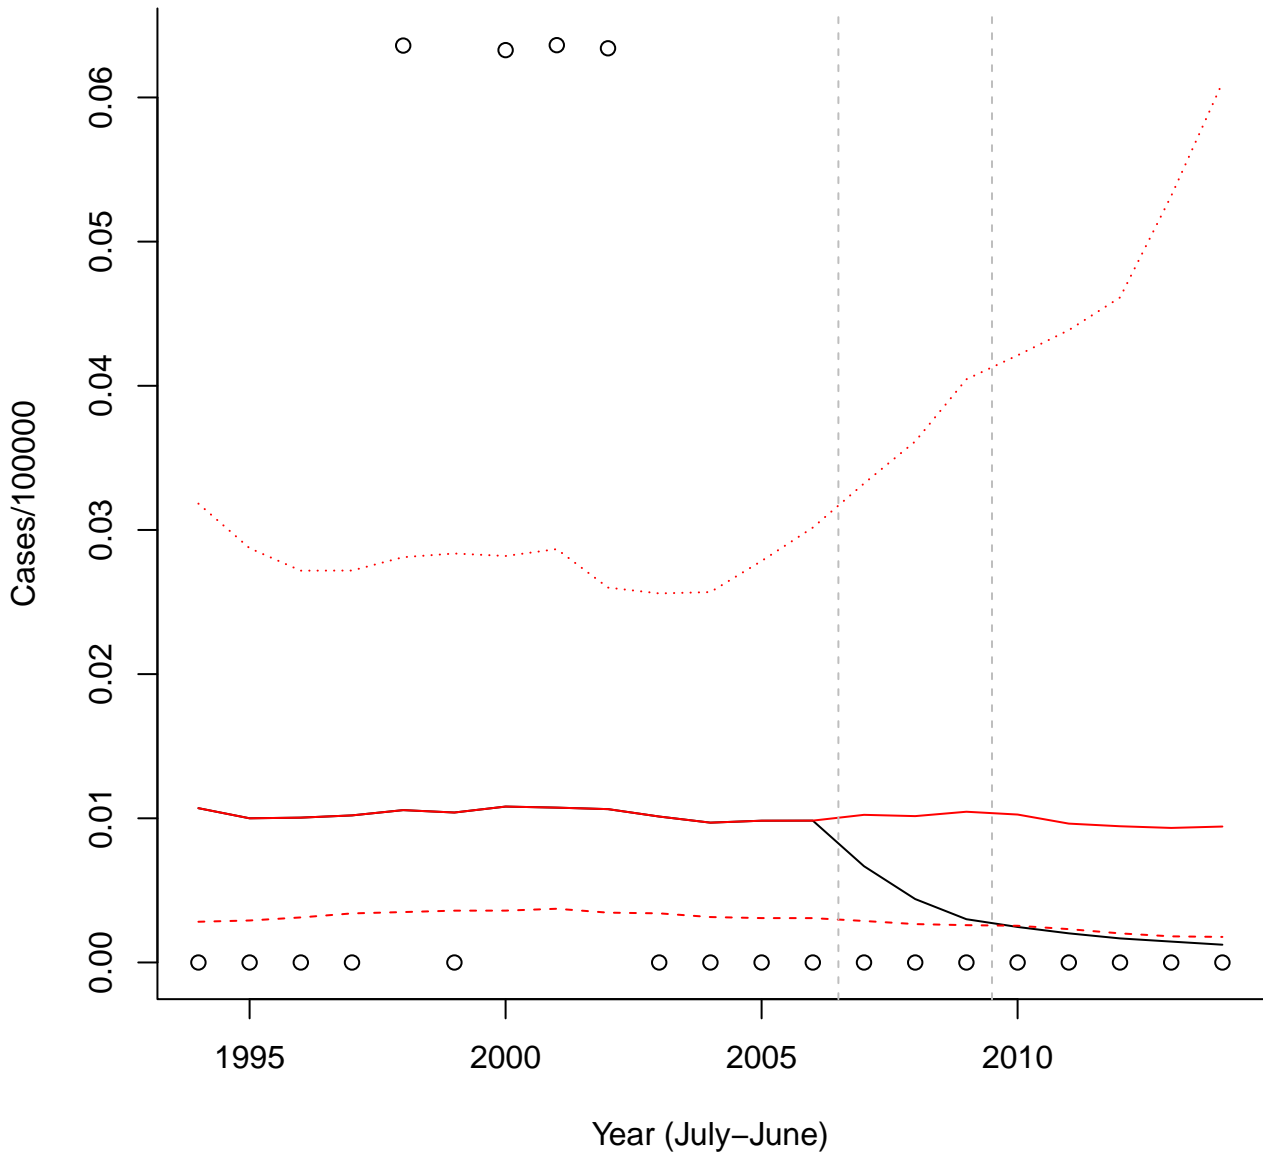

# 40-64y Without comorbidity Serotype 7F

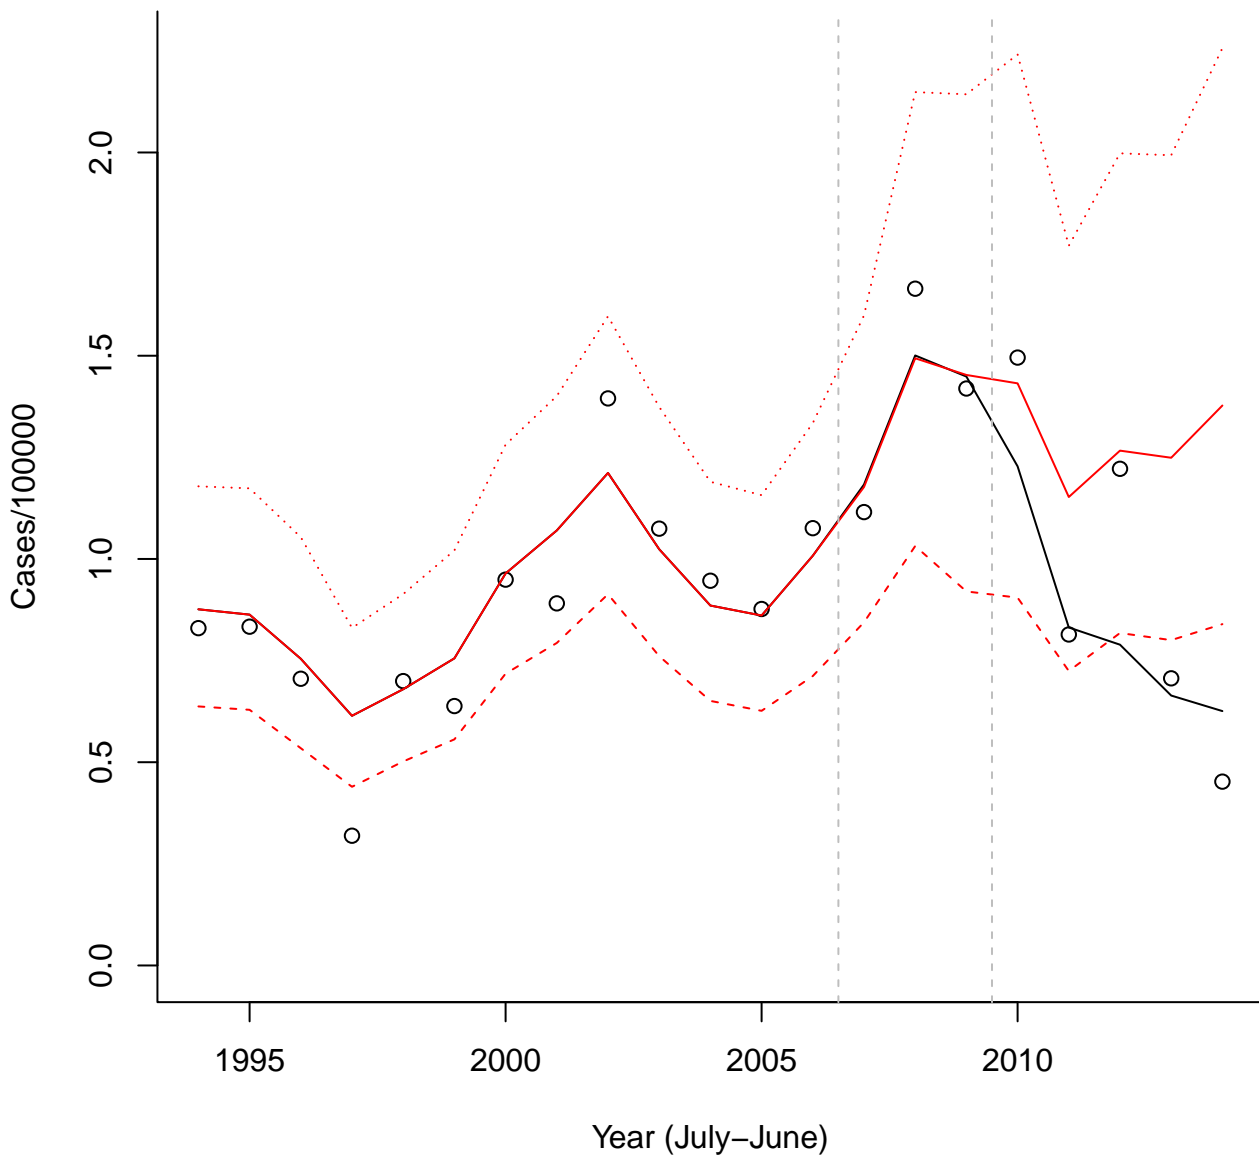

# 40–64y Without comorbidity Serotype 8

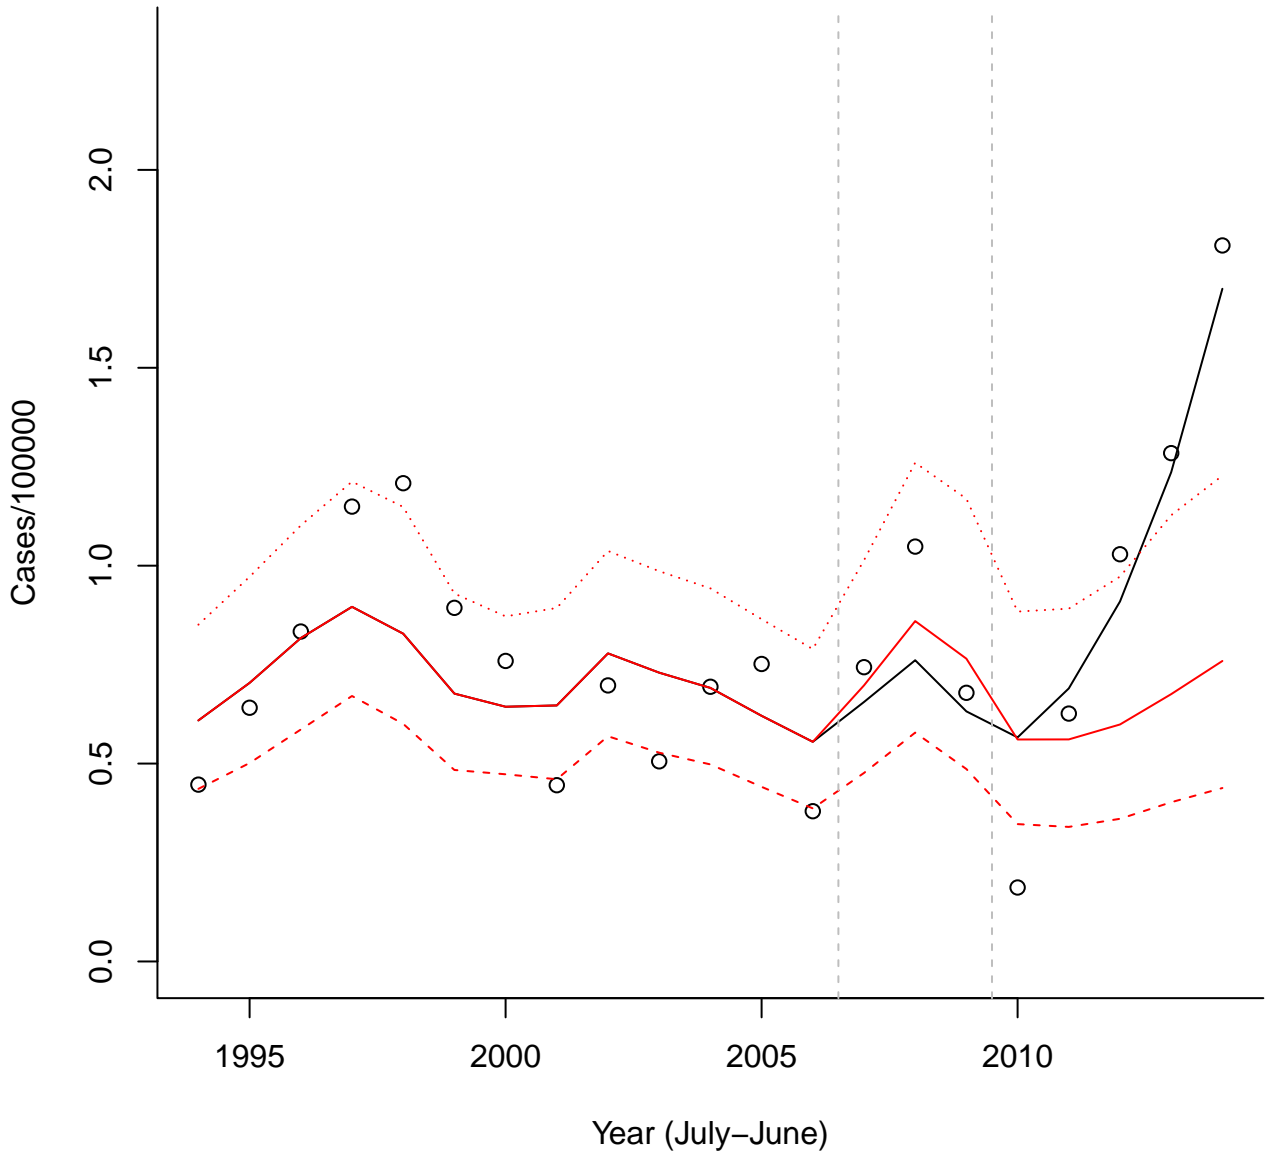

# 40–64y Without comorbidity Serotype 9A

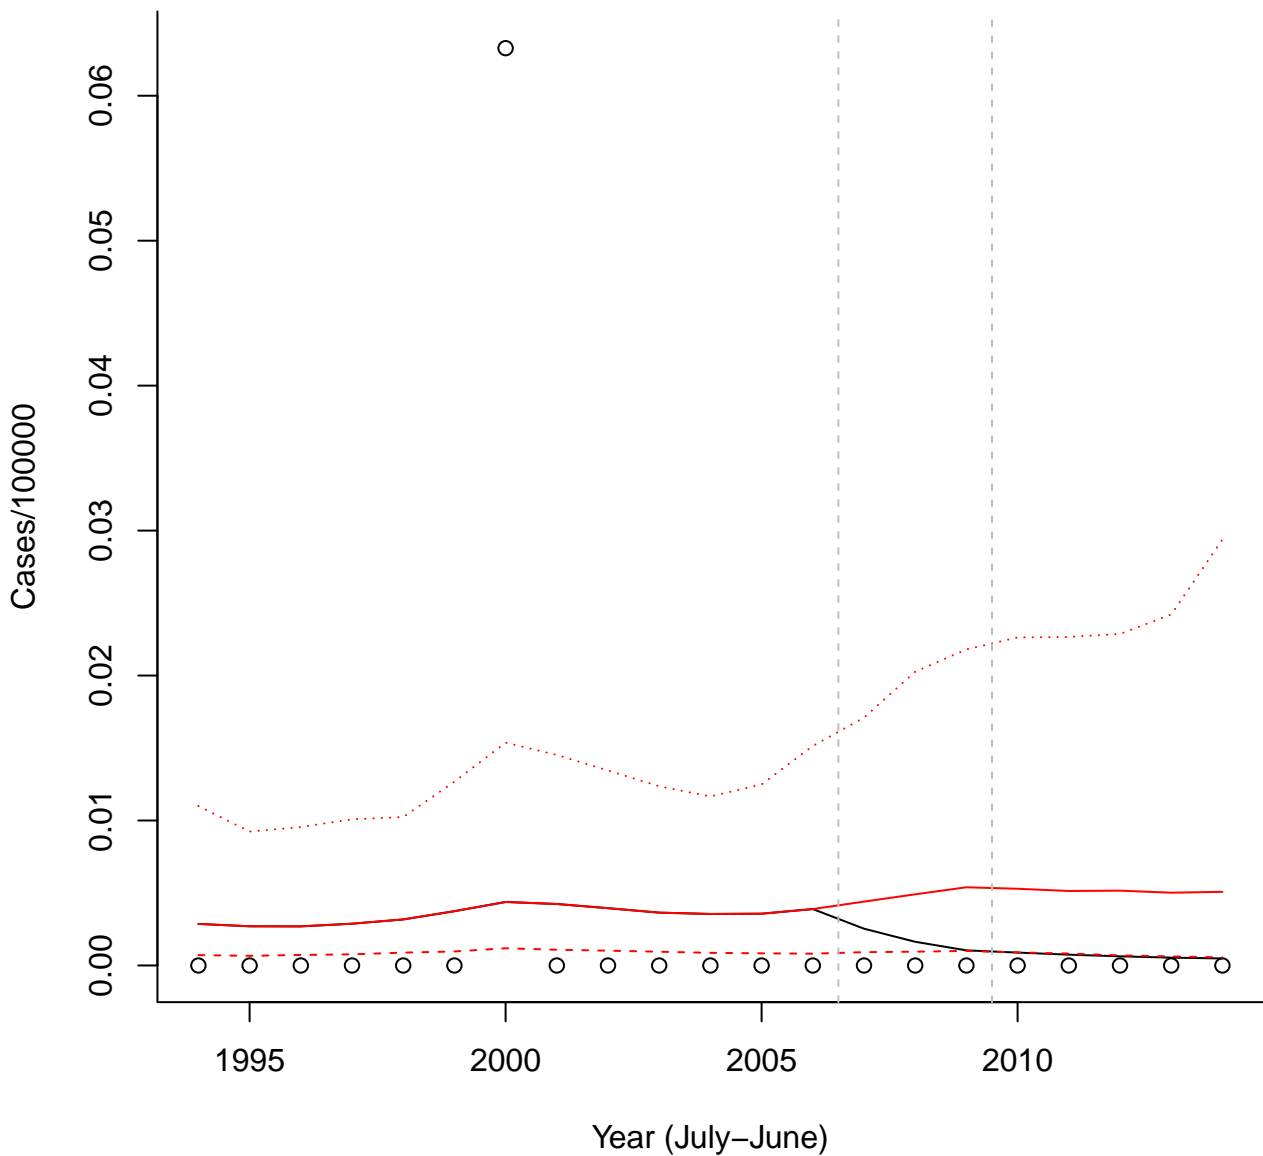

# 40-64y Without comorbidity Serotype 9N

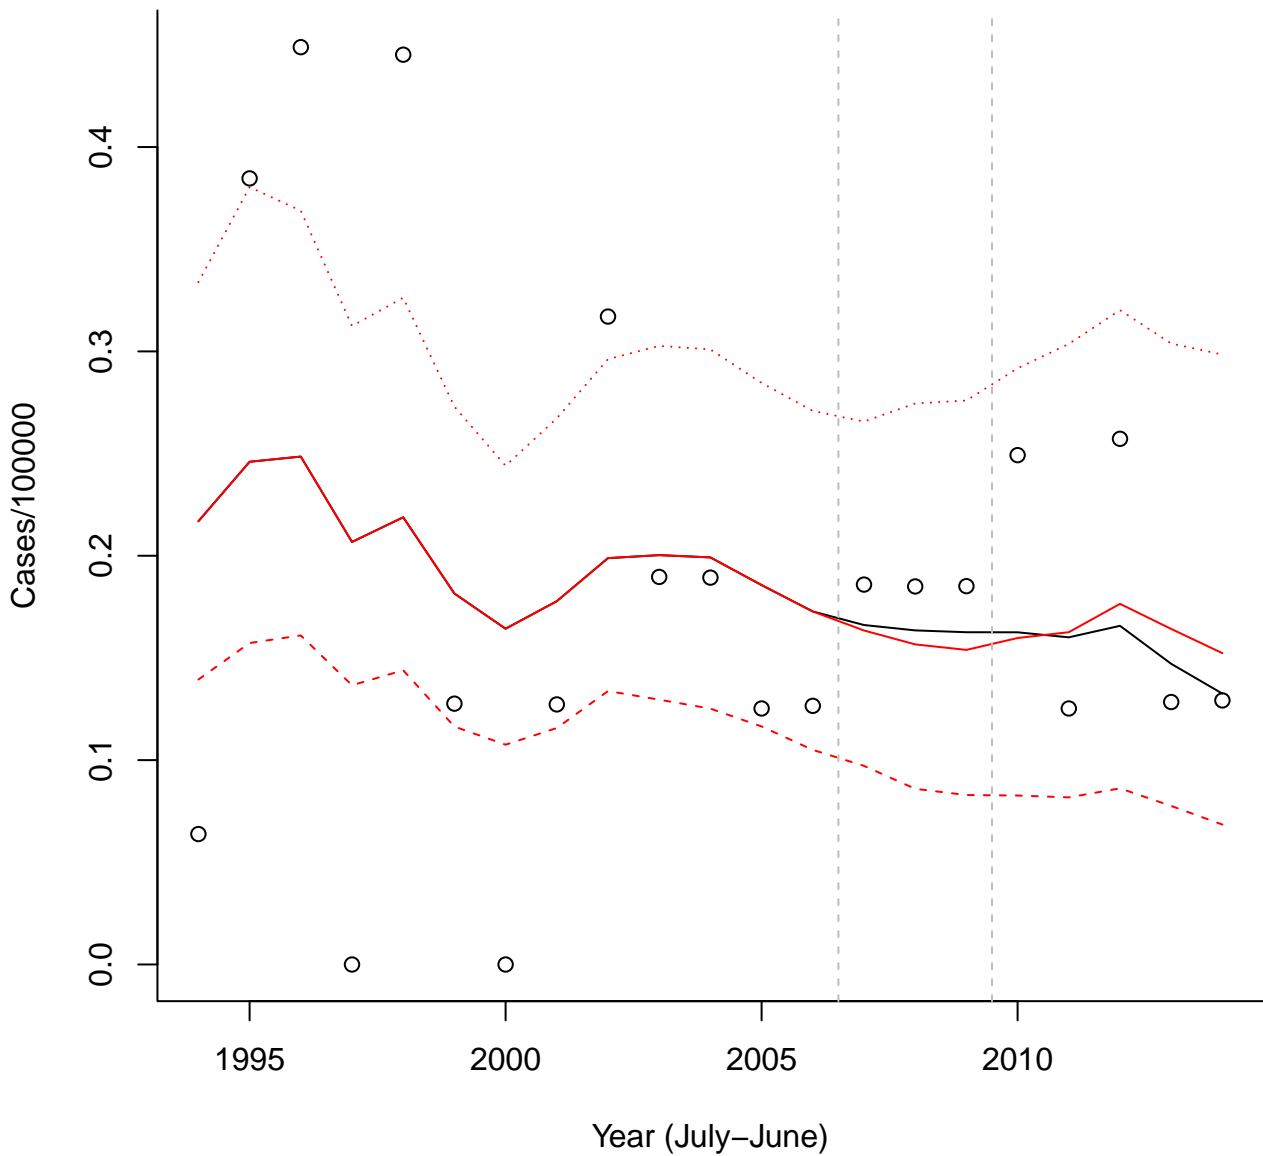

# 40–64y Without comorbidity Serotype 9V

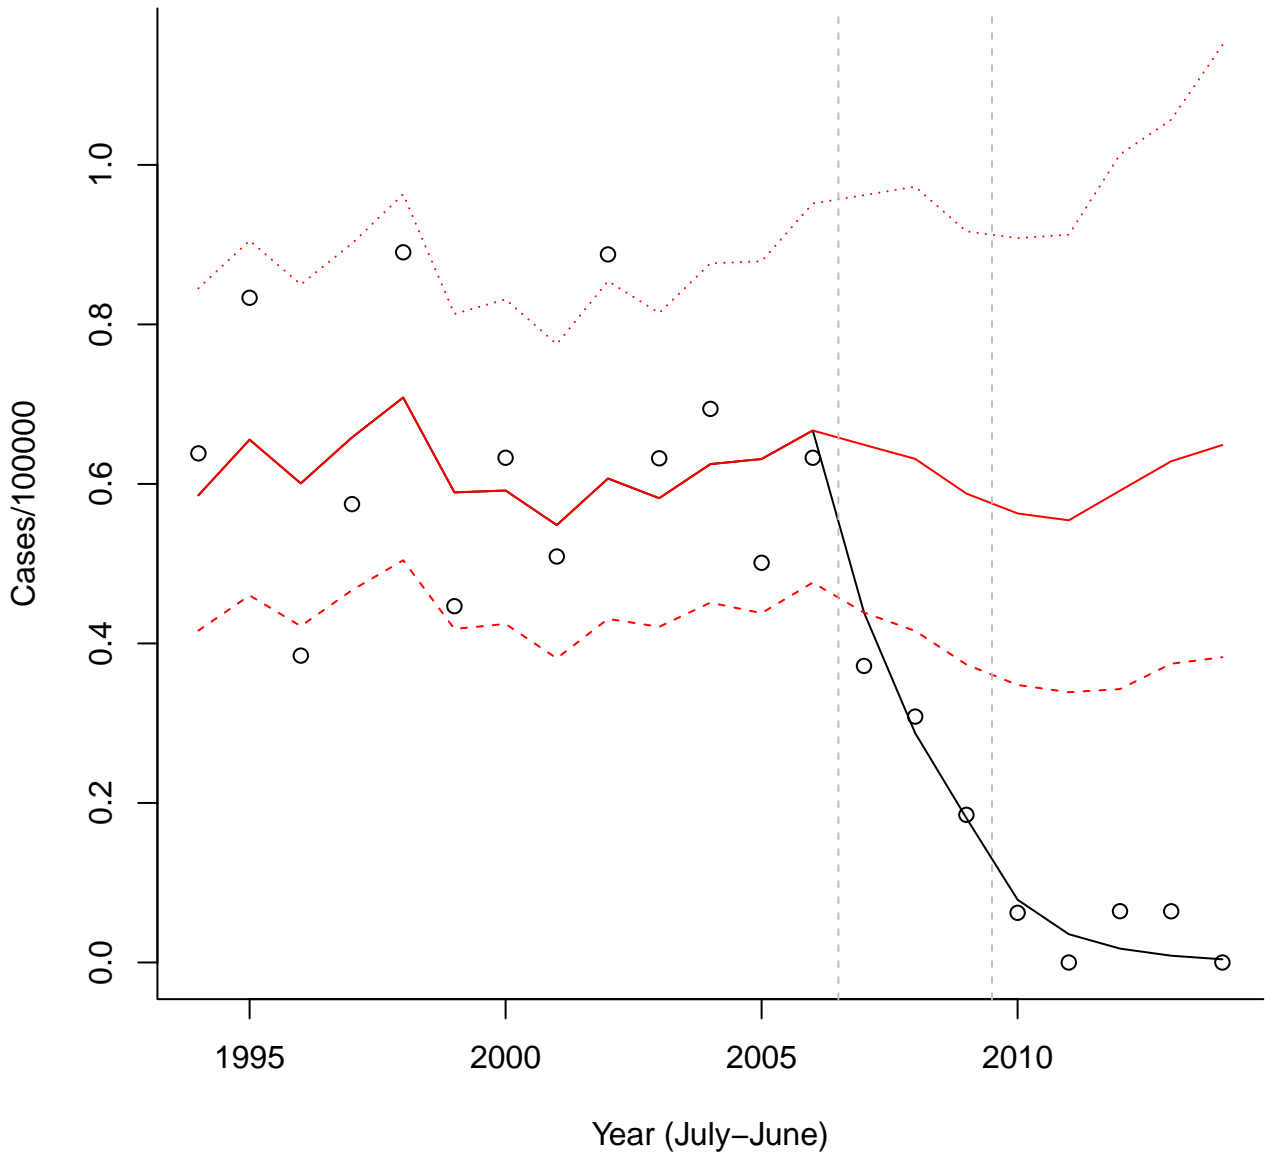

# 40-64y Without comorbidity Serotype OT0

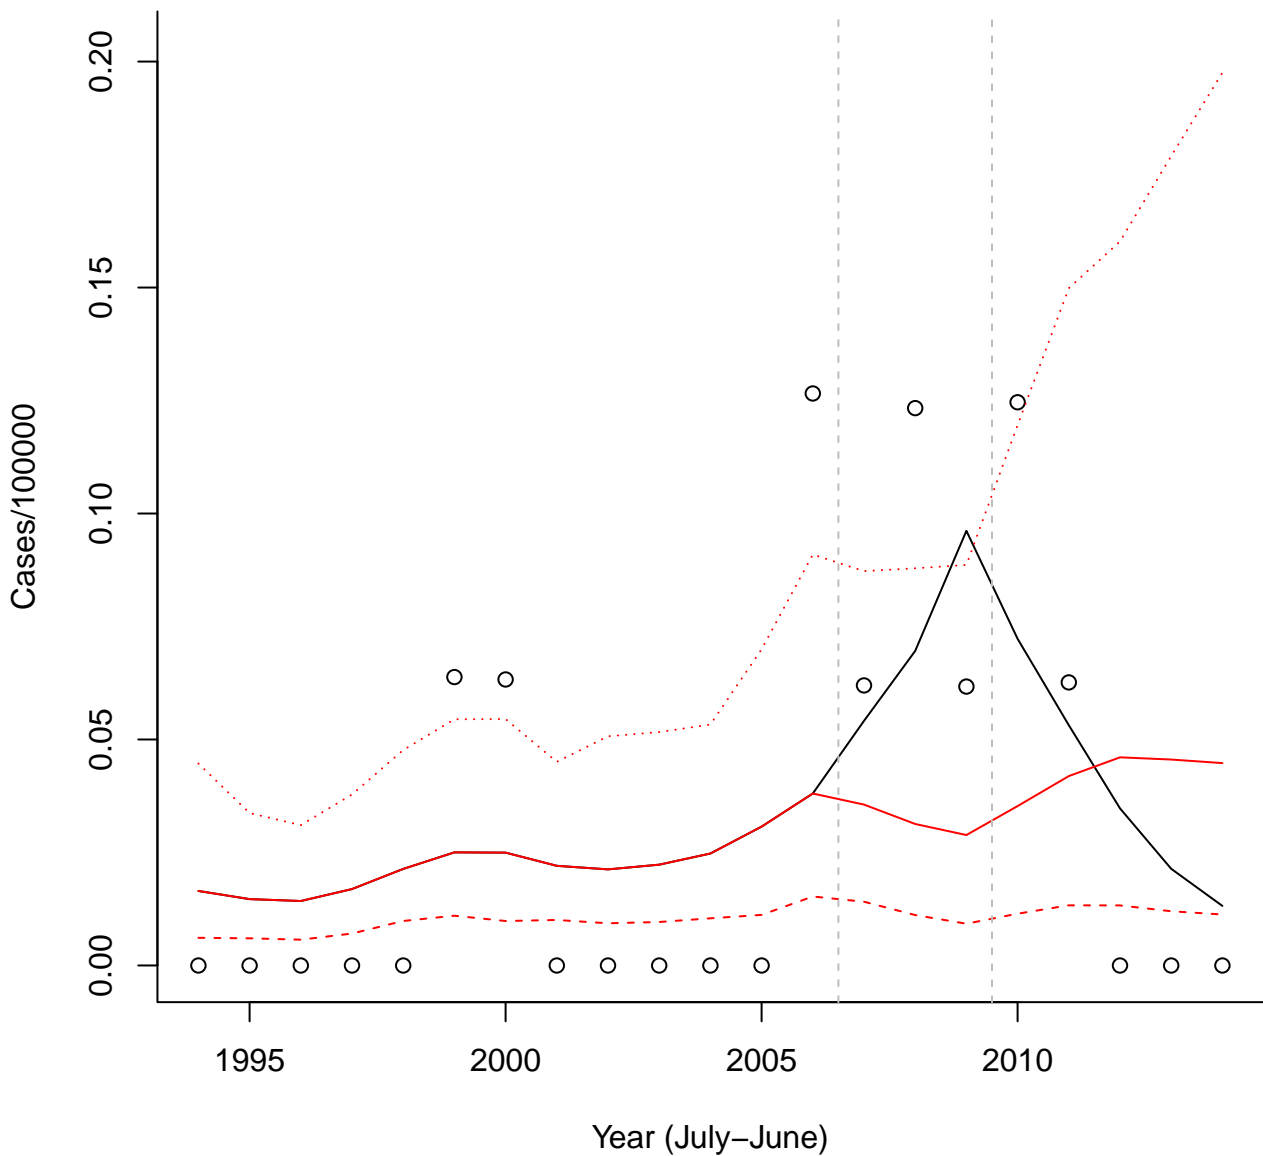



# 65+y Without comorbidity Serotype 1

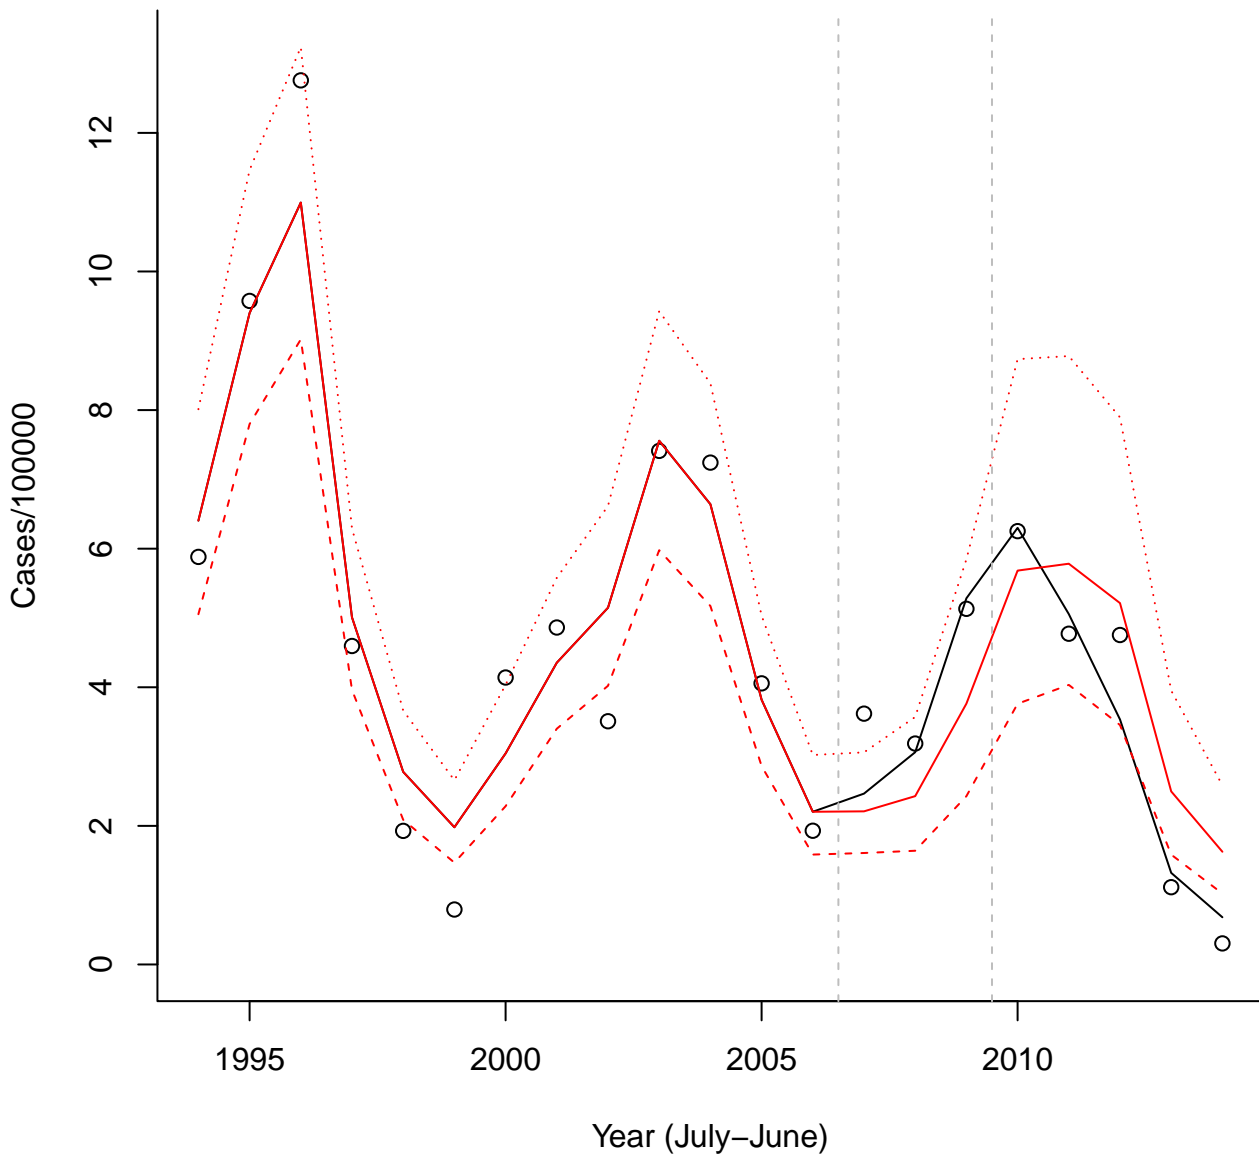

# 65+y Without comorbidity Serotype 10A

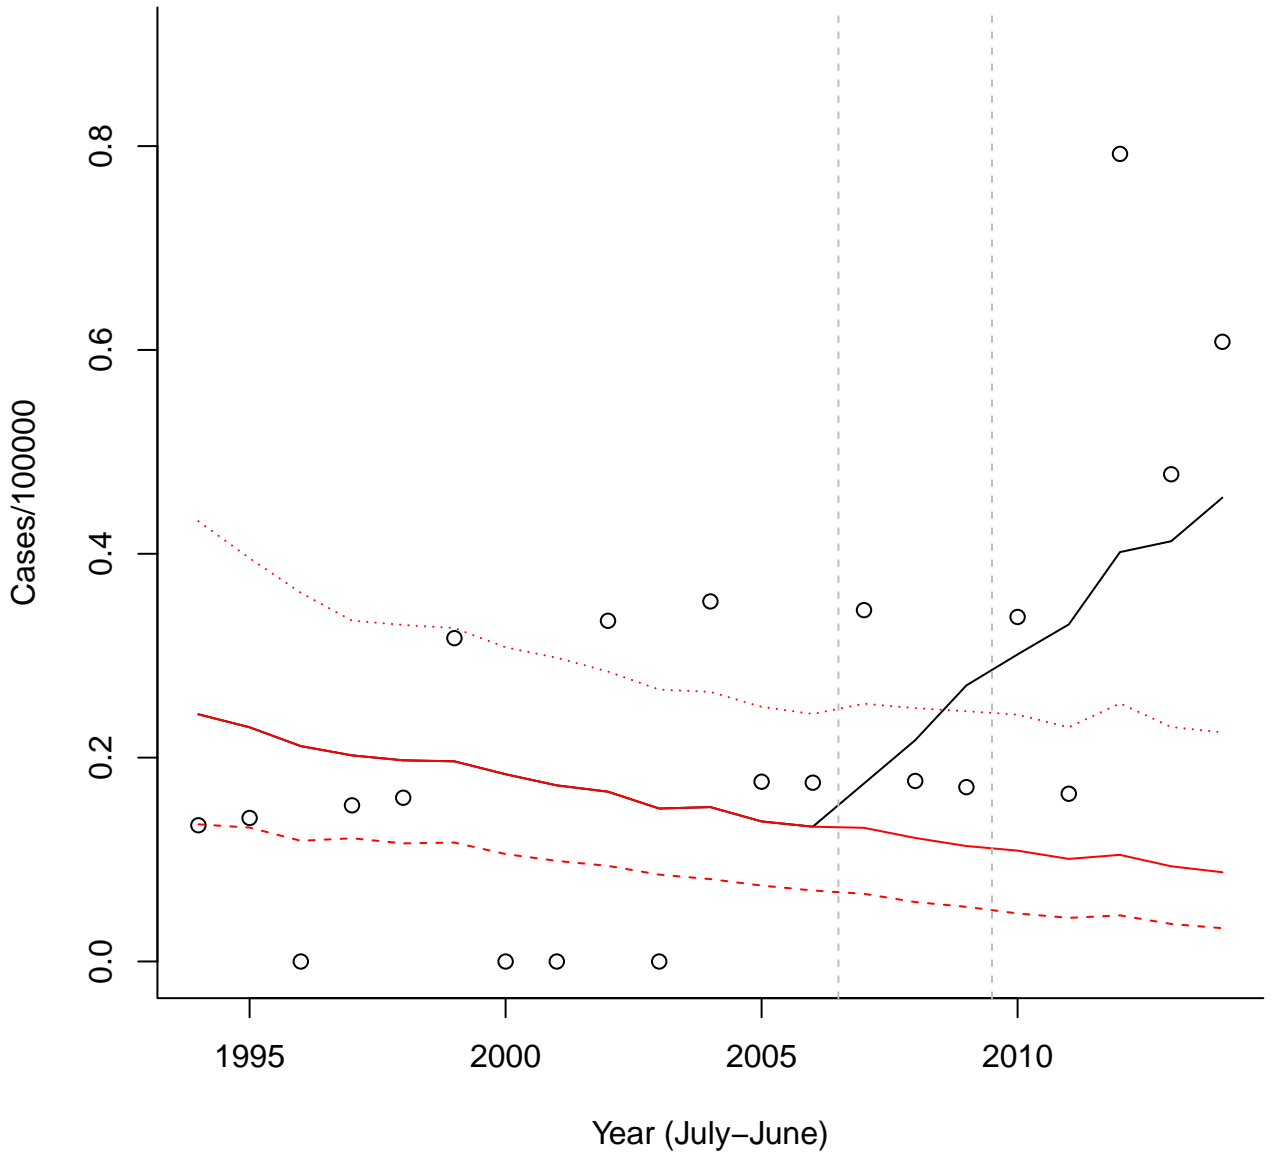

# 65+y Without comorbidity Serotype 10B

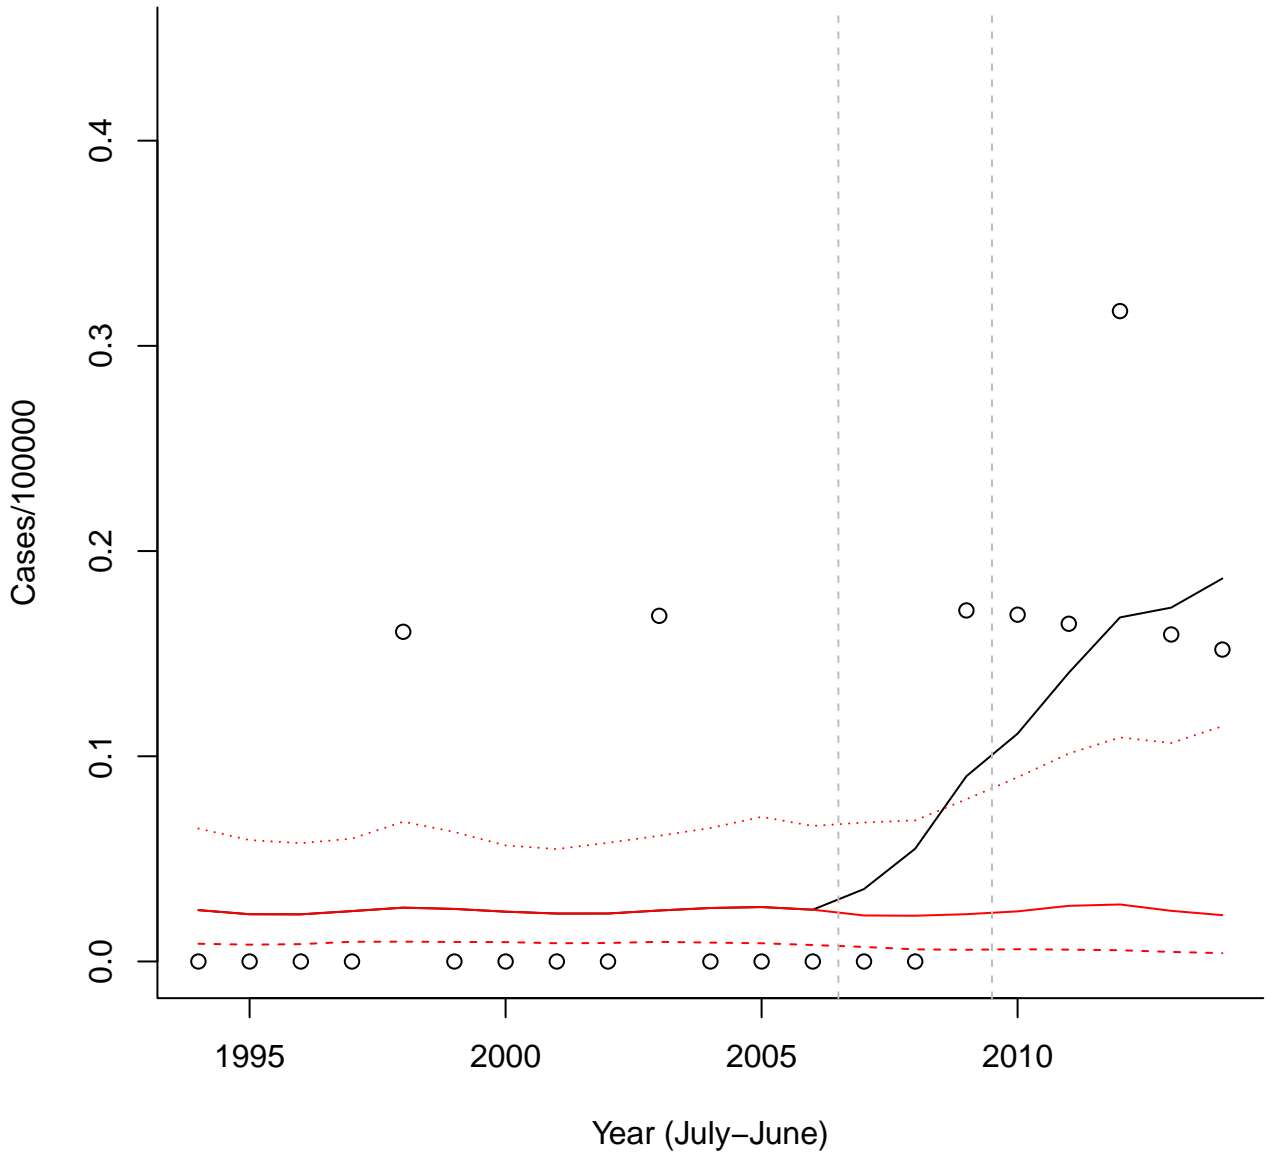

# 65+y Without comorbidity Serotype 10F

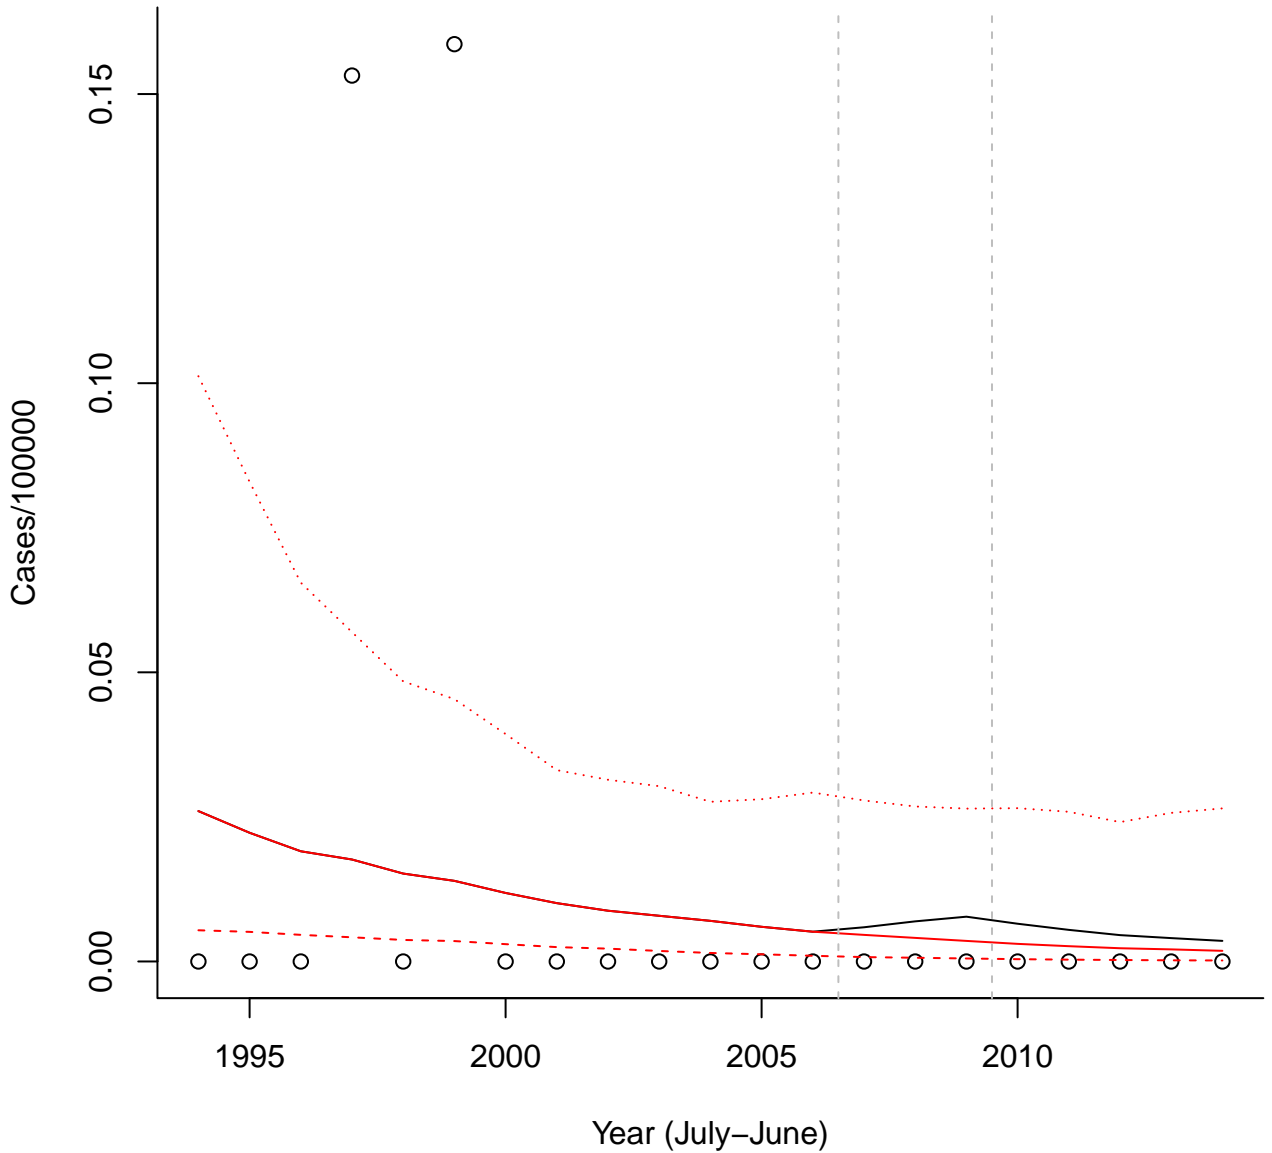

# 65+y Without comorbidity Serotype 11A

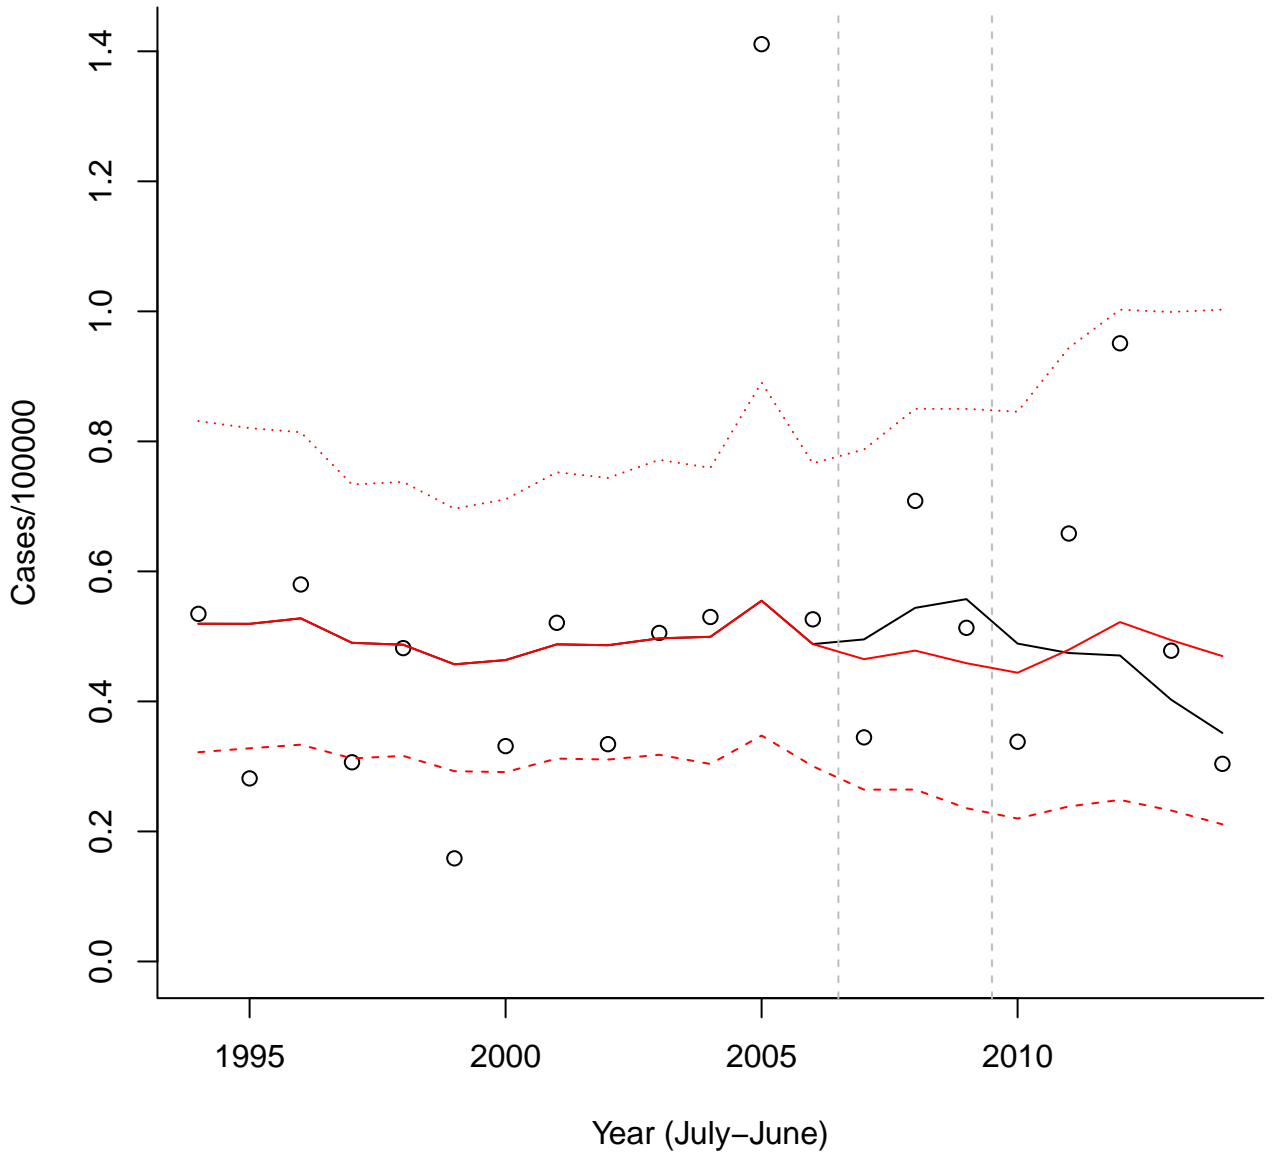

# 65+y Without comorbidity Serotype 11B

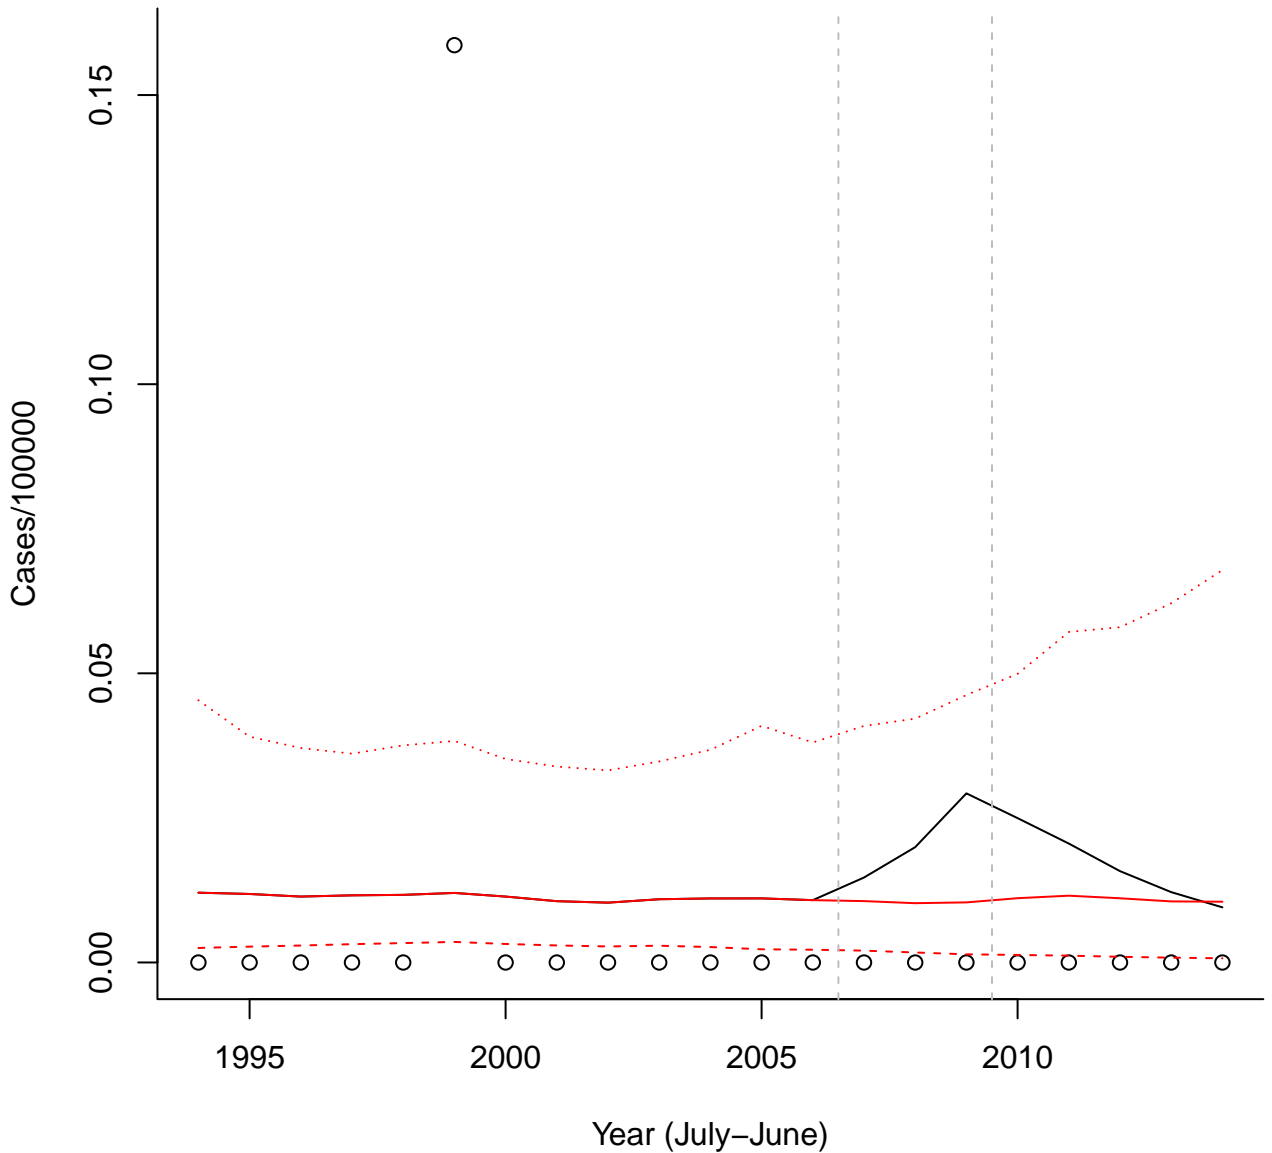

# 65+y Without comorbidity Serotype 11F

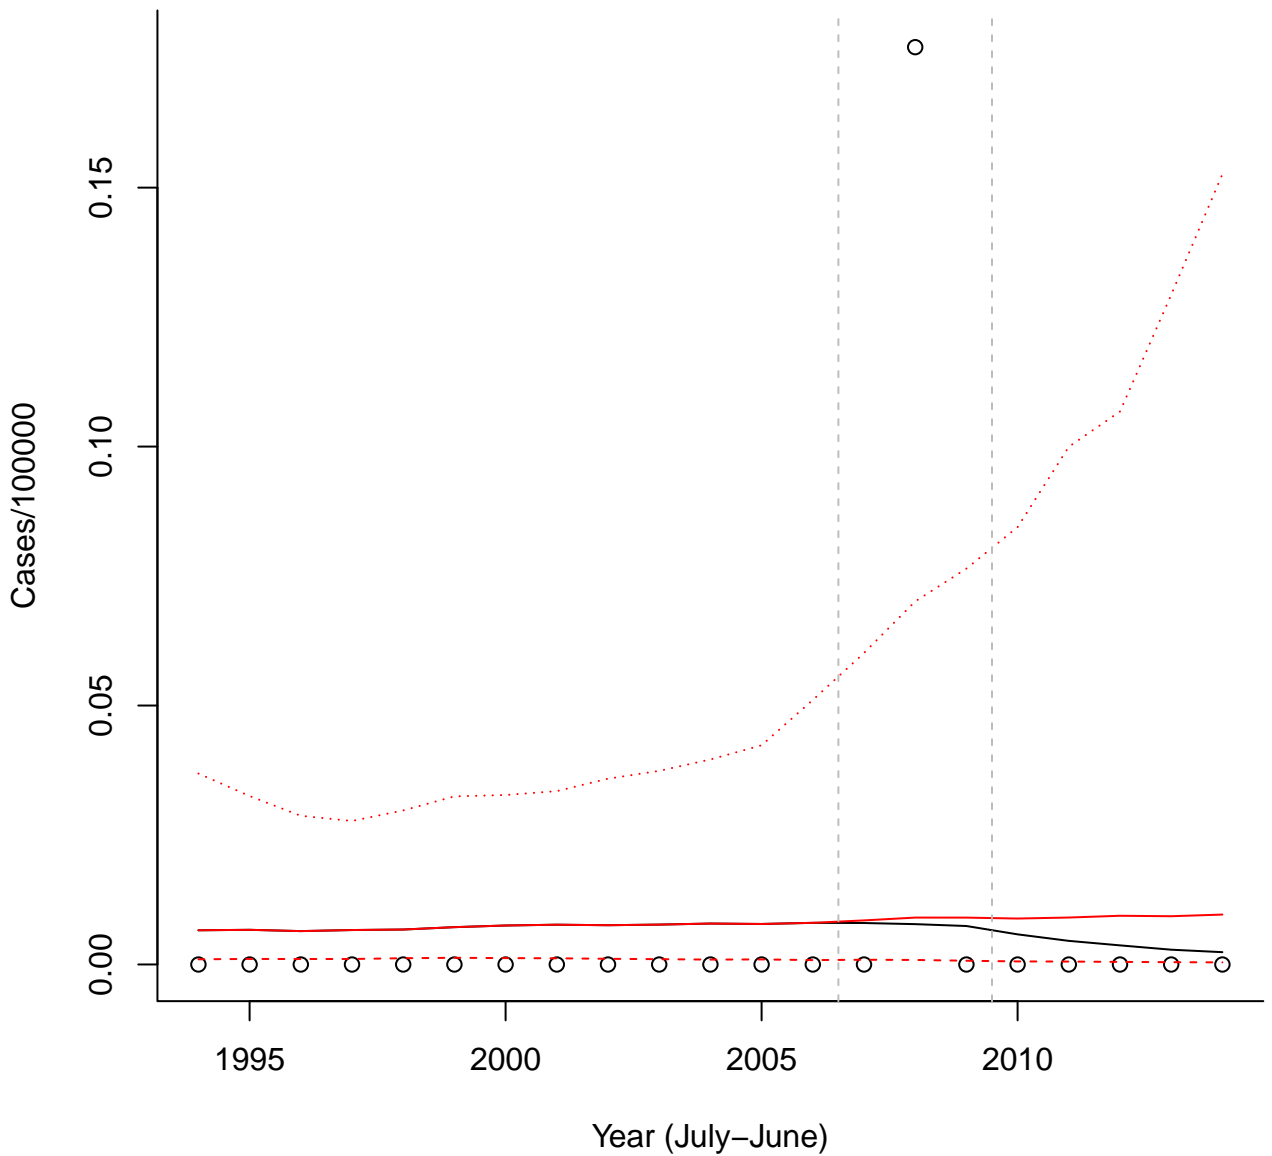

# 65+y Without comorbidity Serotype 12A

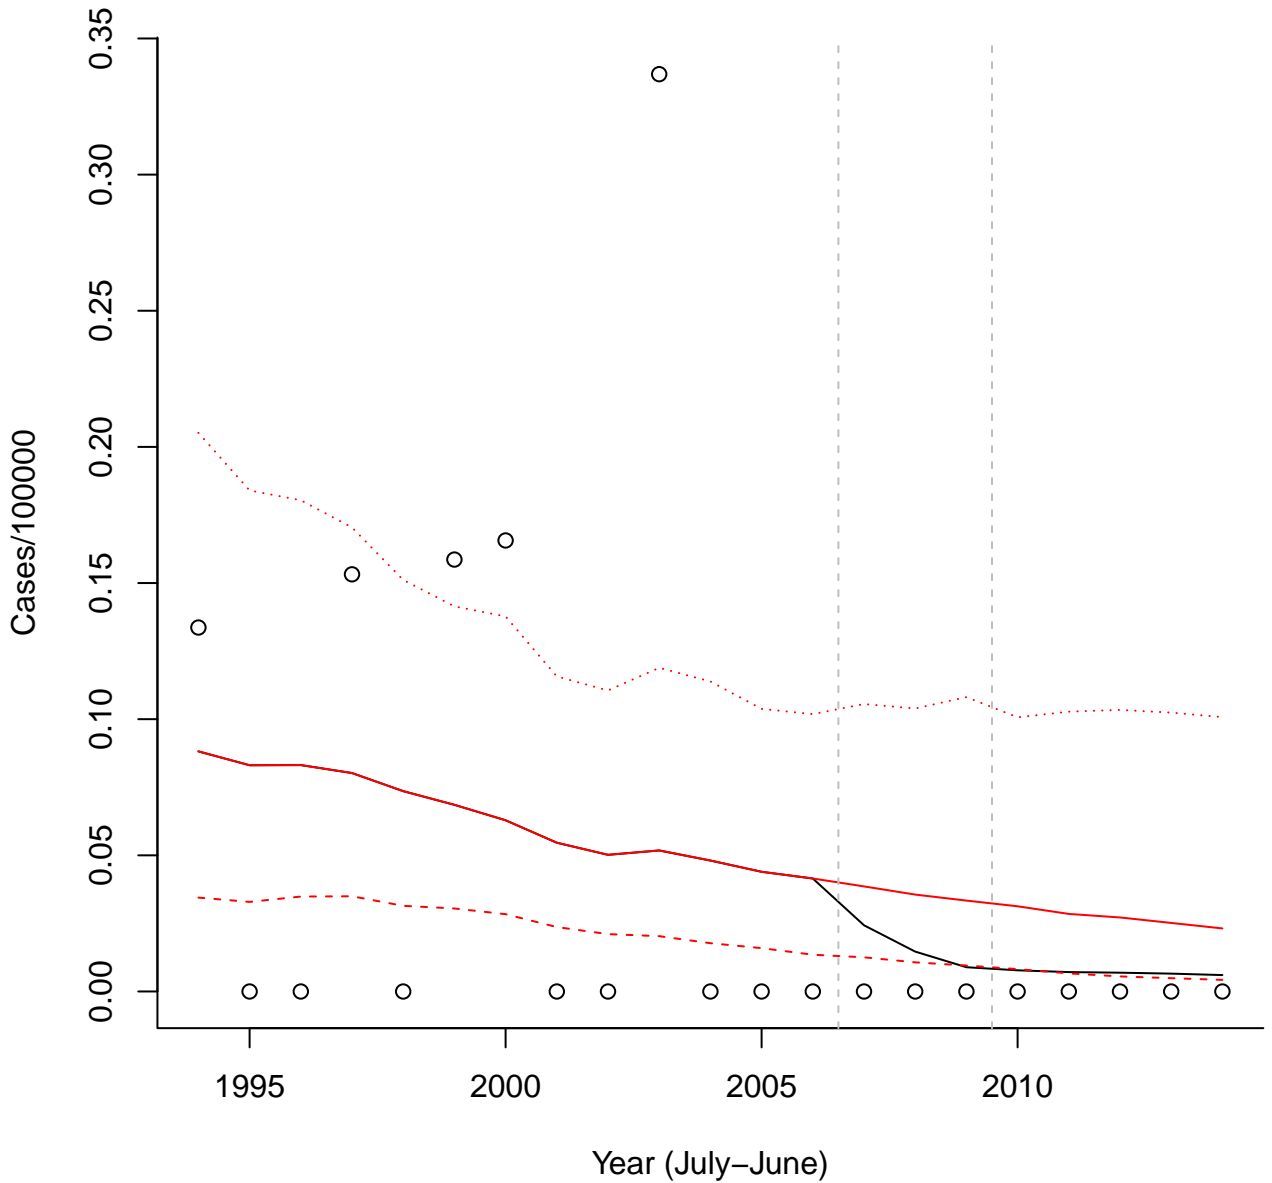



# 65+y Without comorbidity Serotype 12F

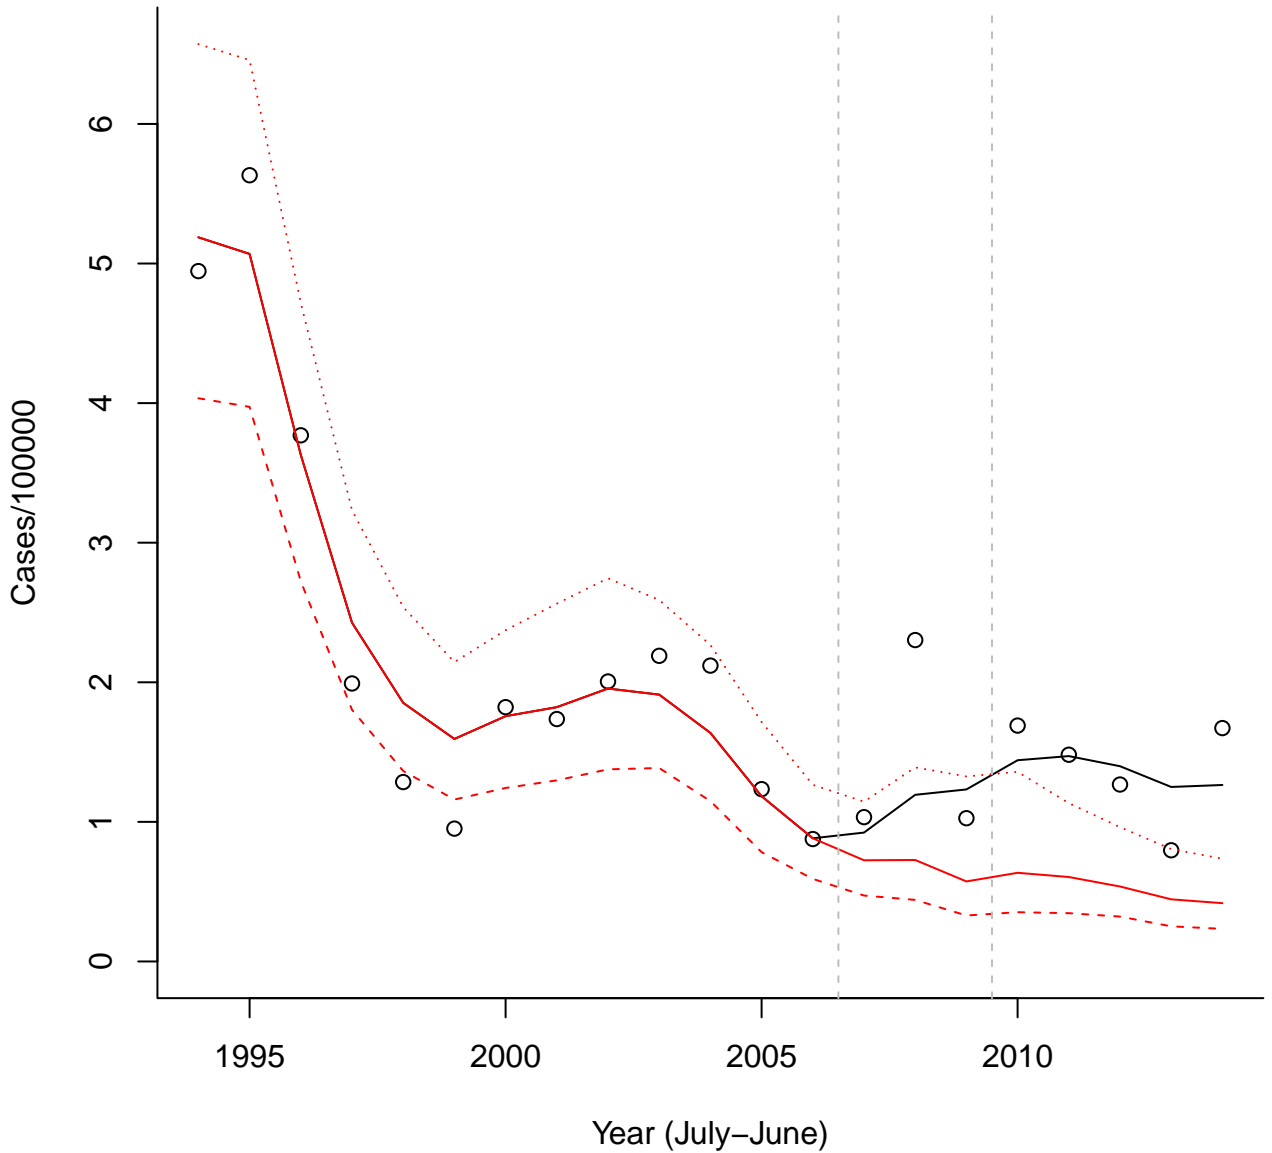

# 65+y Without comorbidity Serotype 13

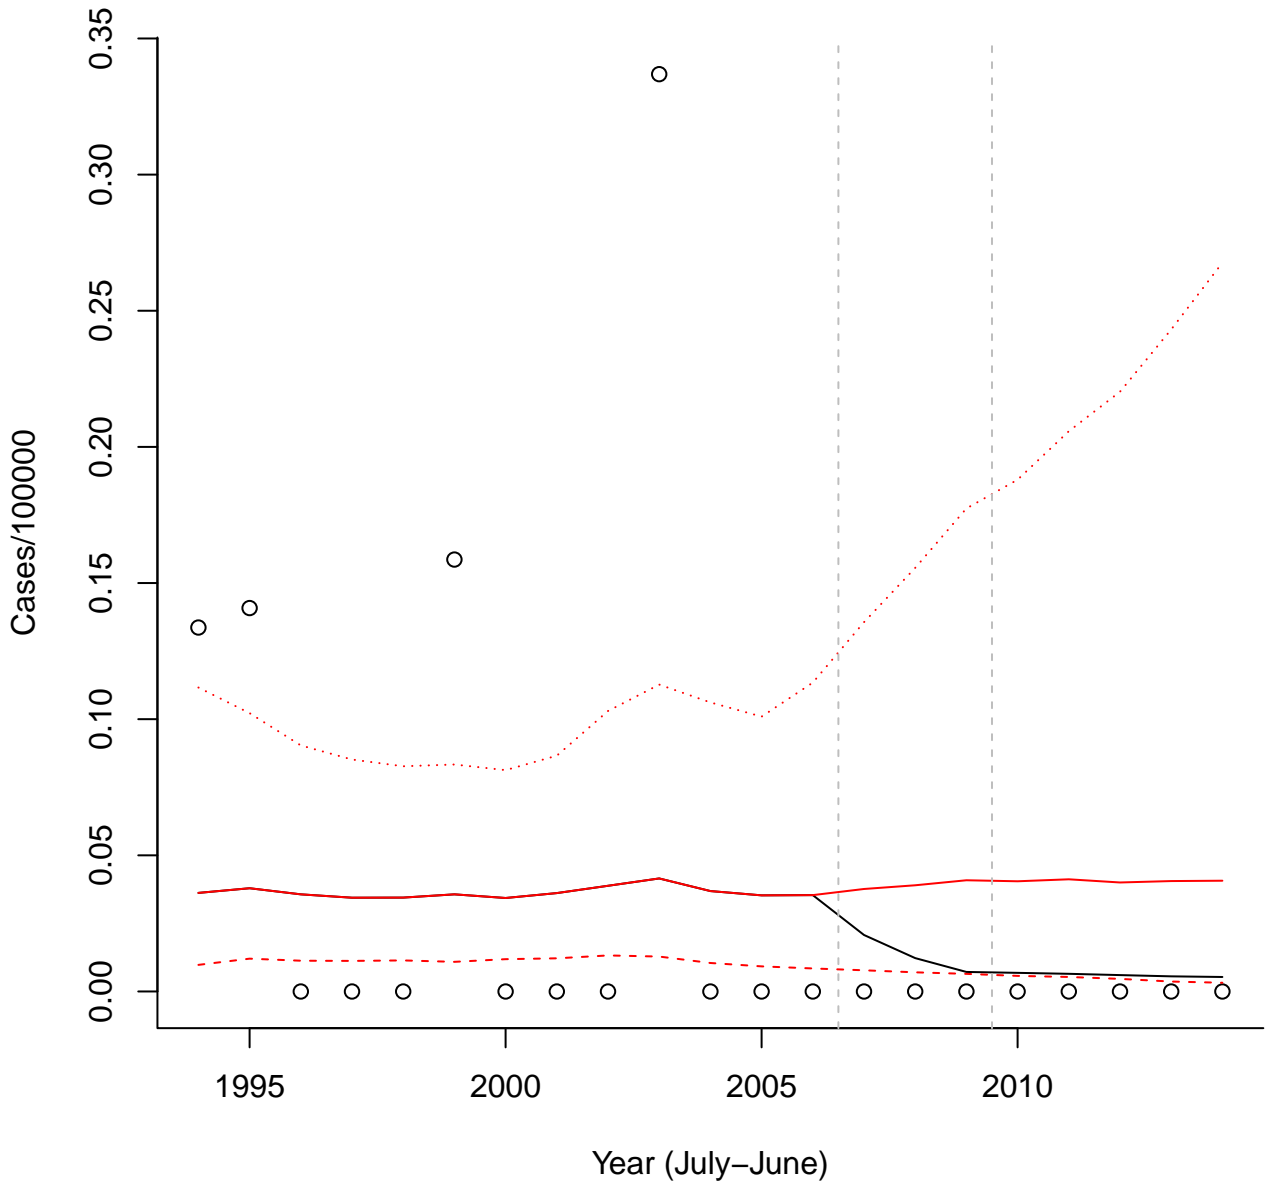

# 65+y Without comorbidity Serotype 14

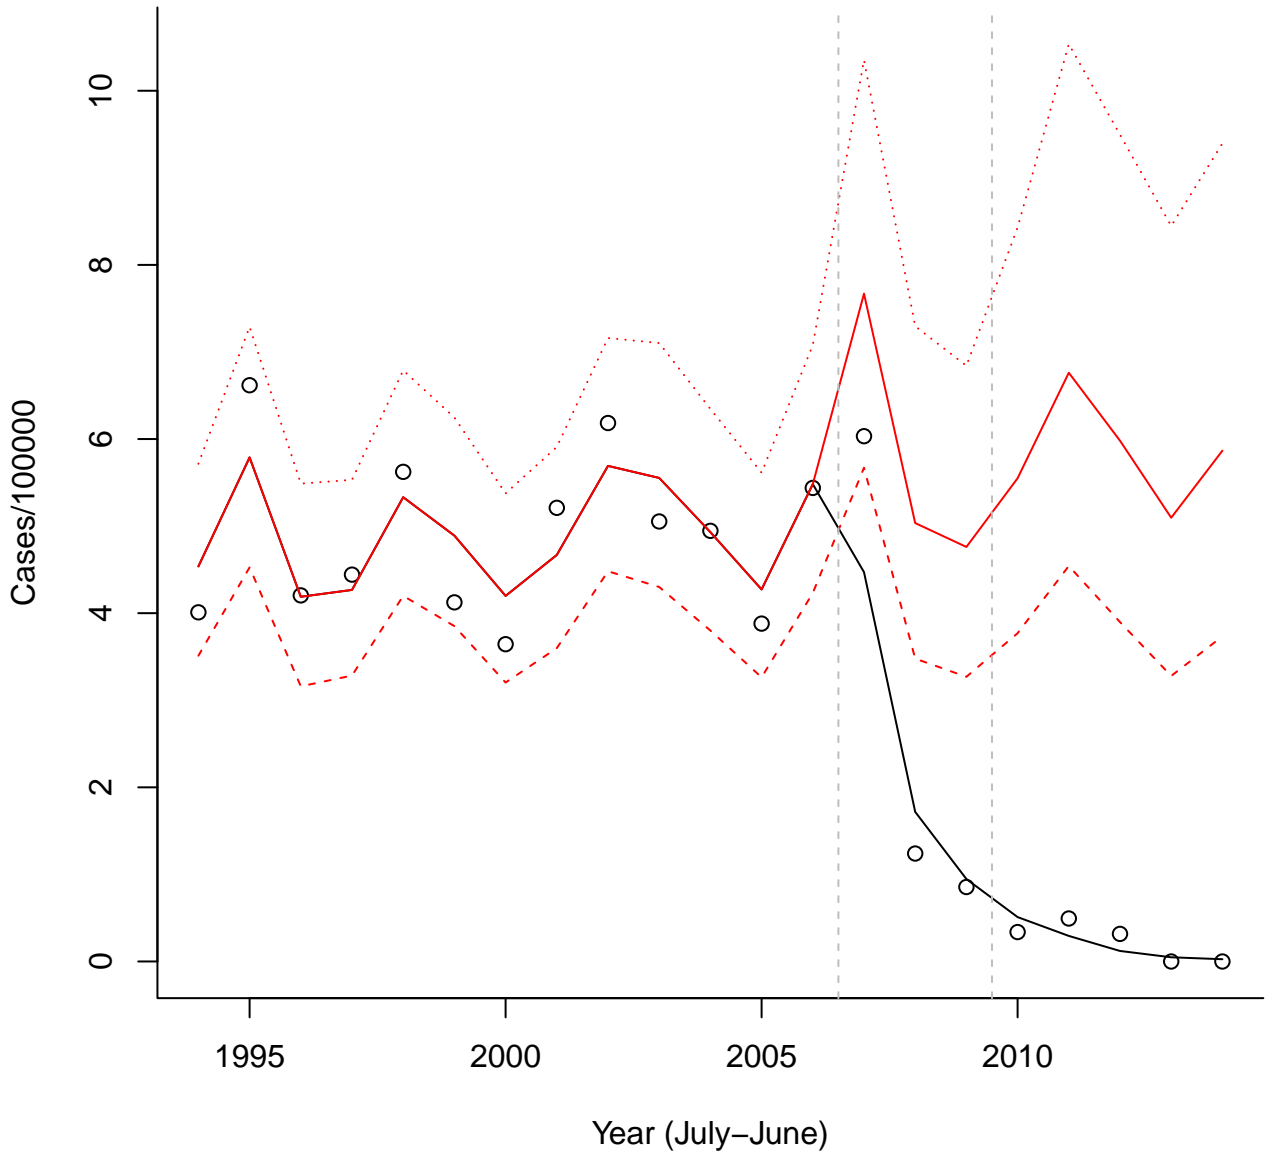

# 65+y Without comorbidity Serotype 15A

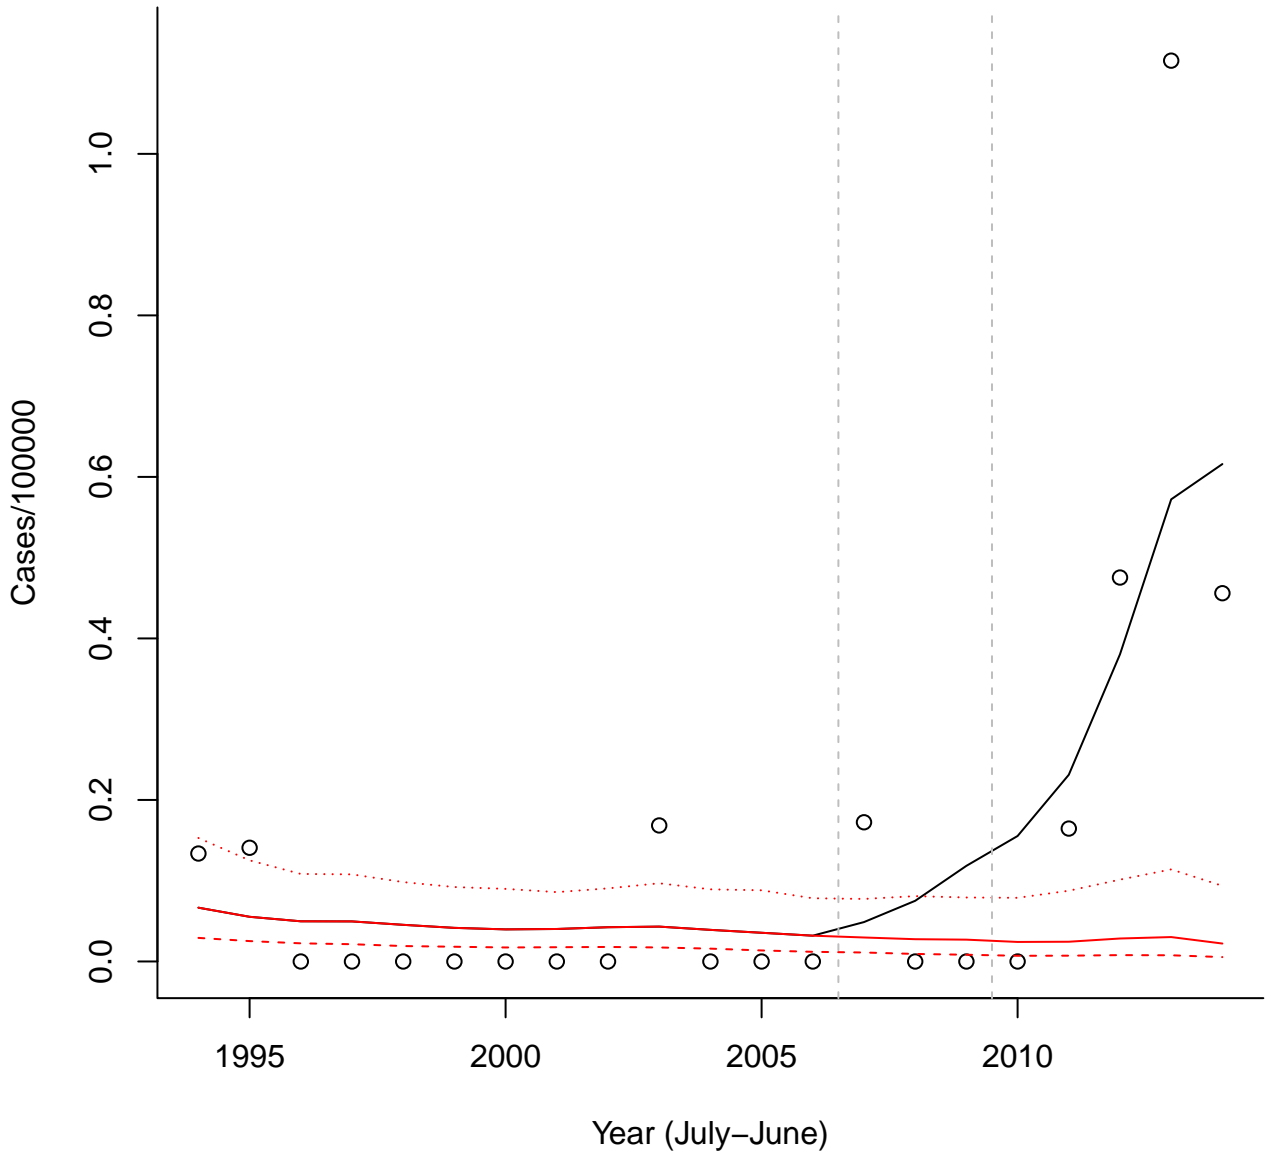

# 65+y Without comorbidity Serotype 15BC

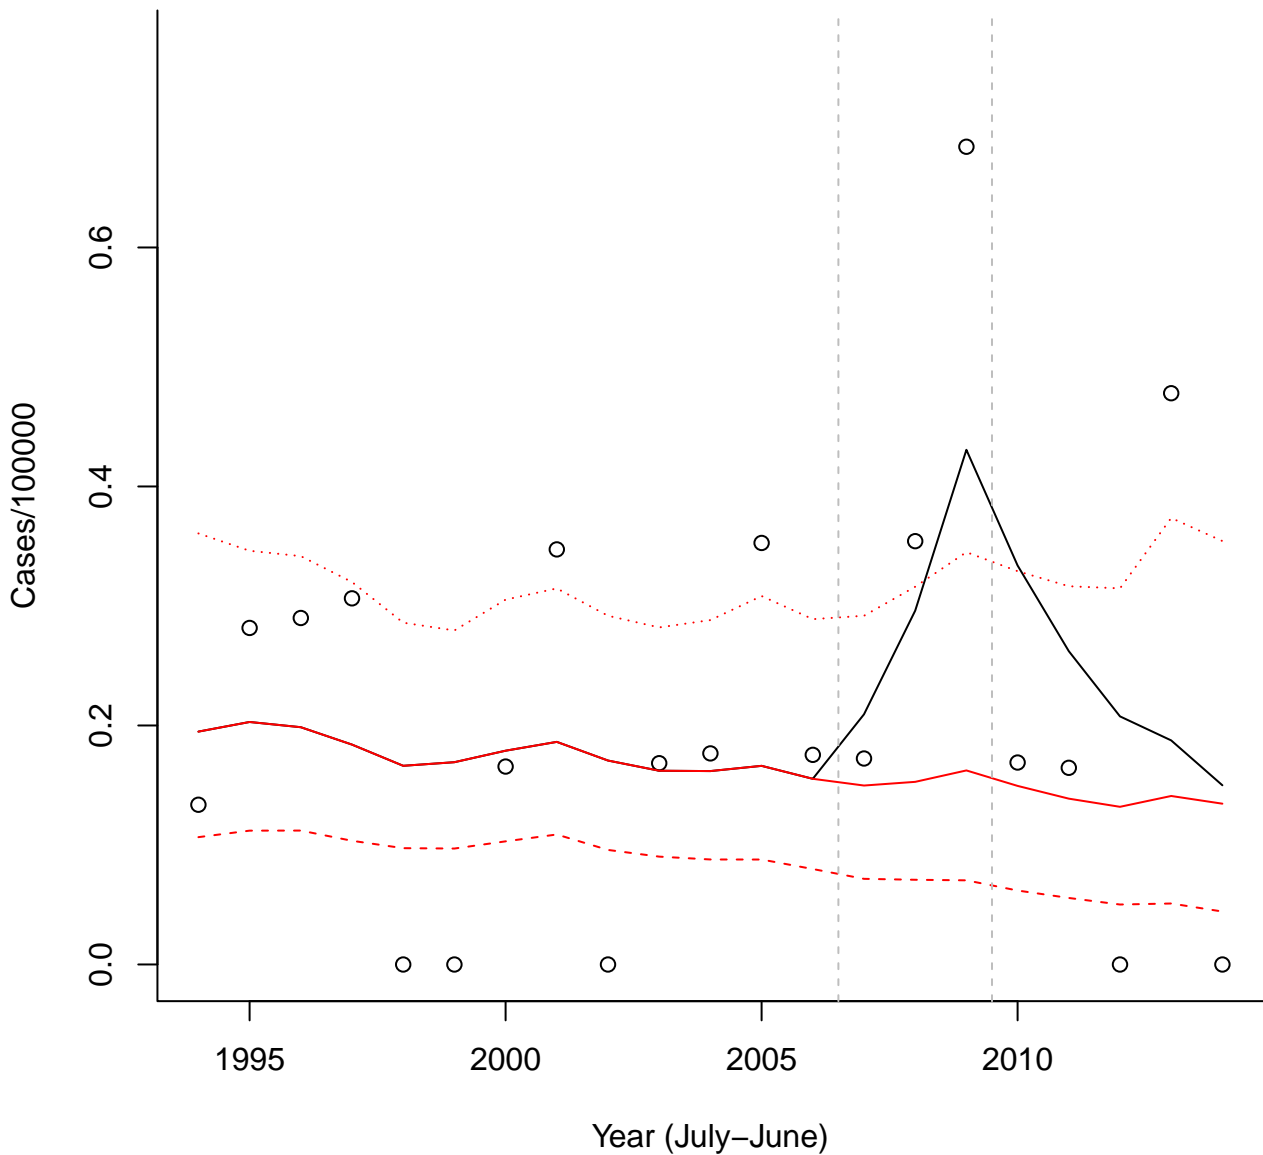

# 65+y Without comorbidity Serotype 16F

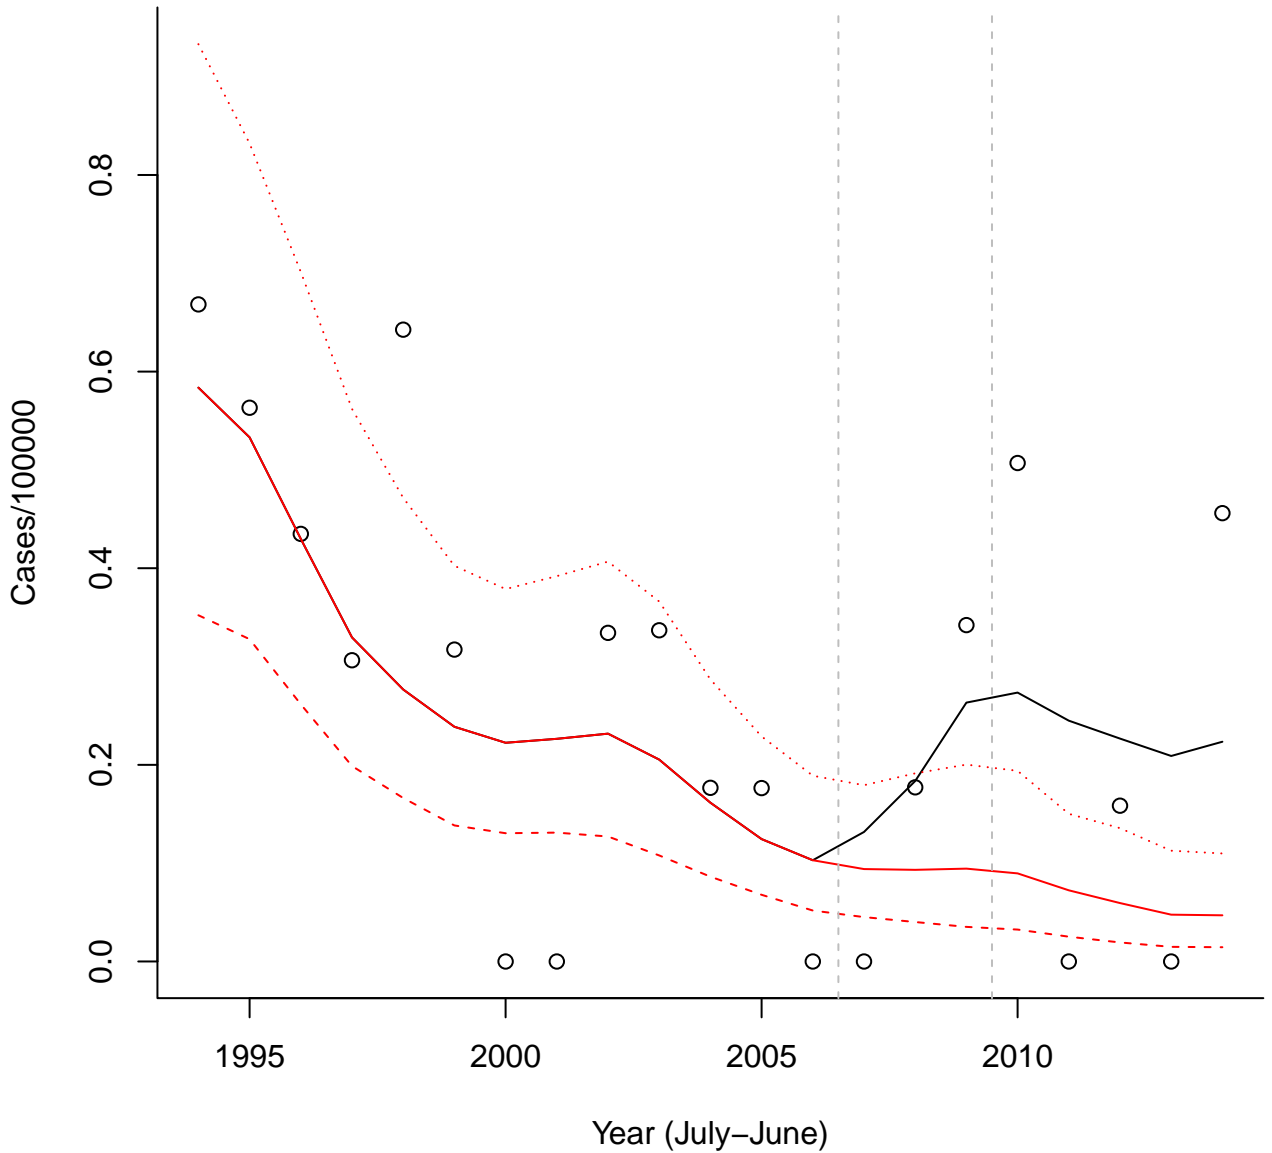

# 65+y Without comorbidity Serotype 17F

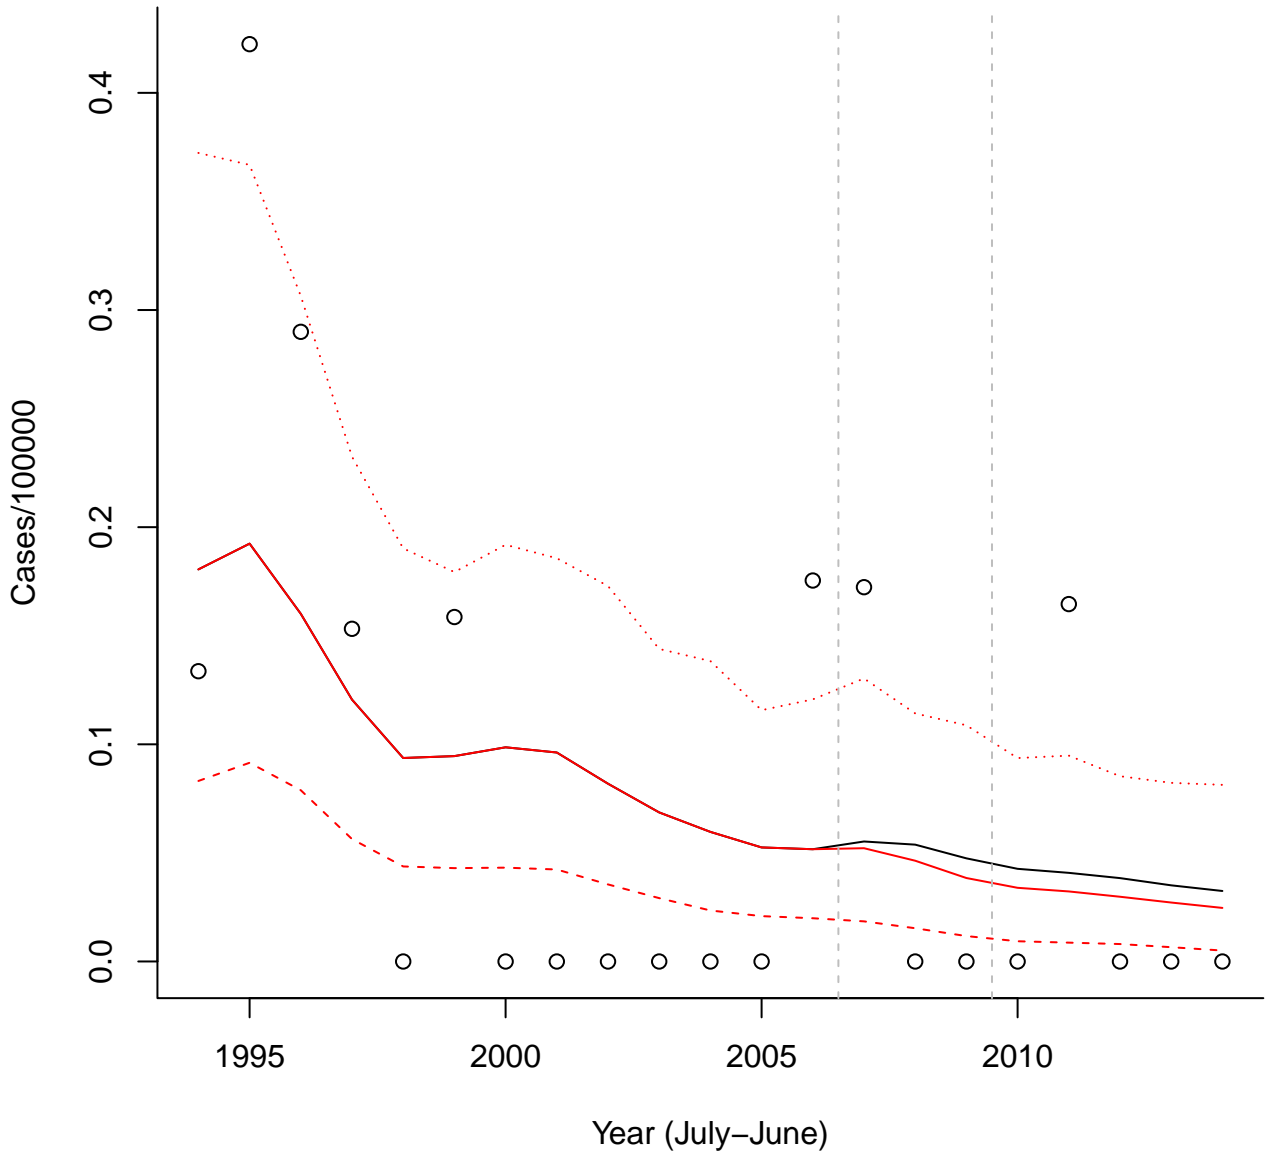

# 65+y Without comorbidity Serotype 18A

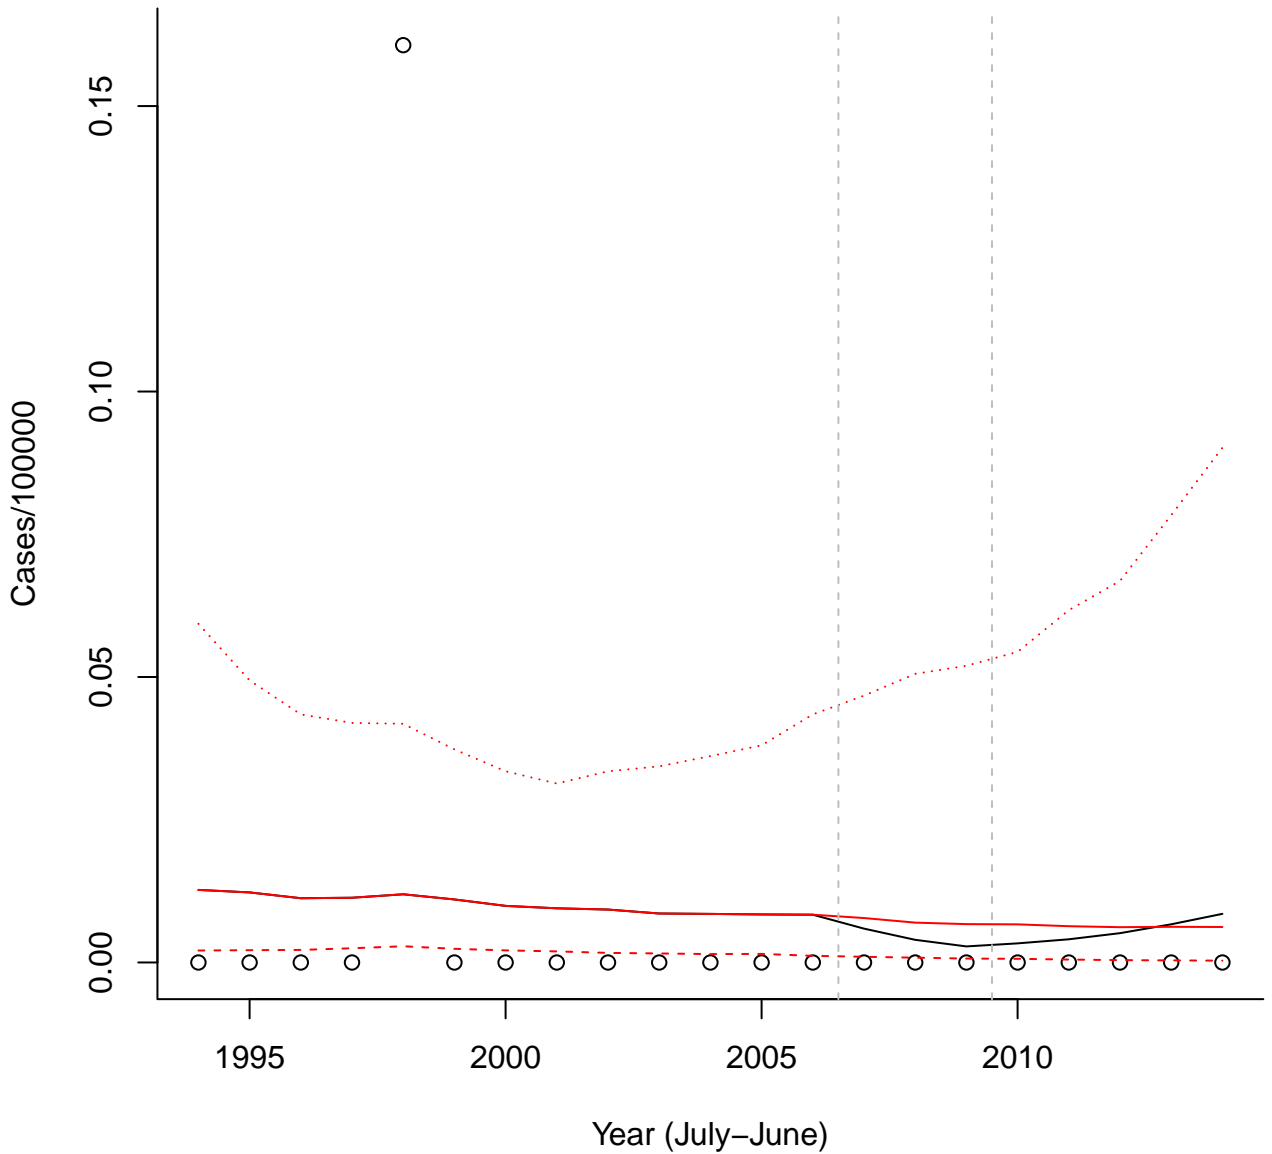



# 65+y Without comorbidity Serotype 18B

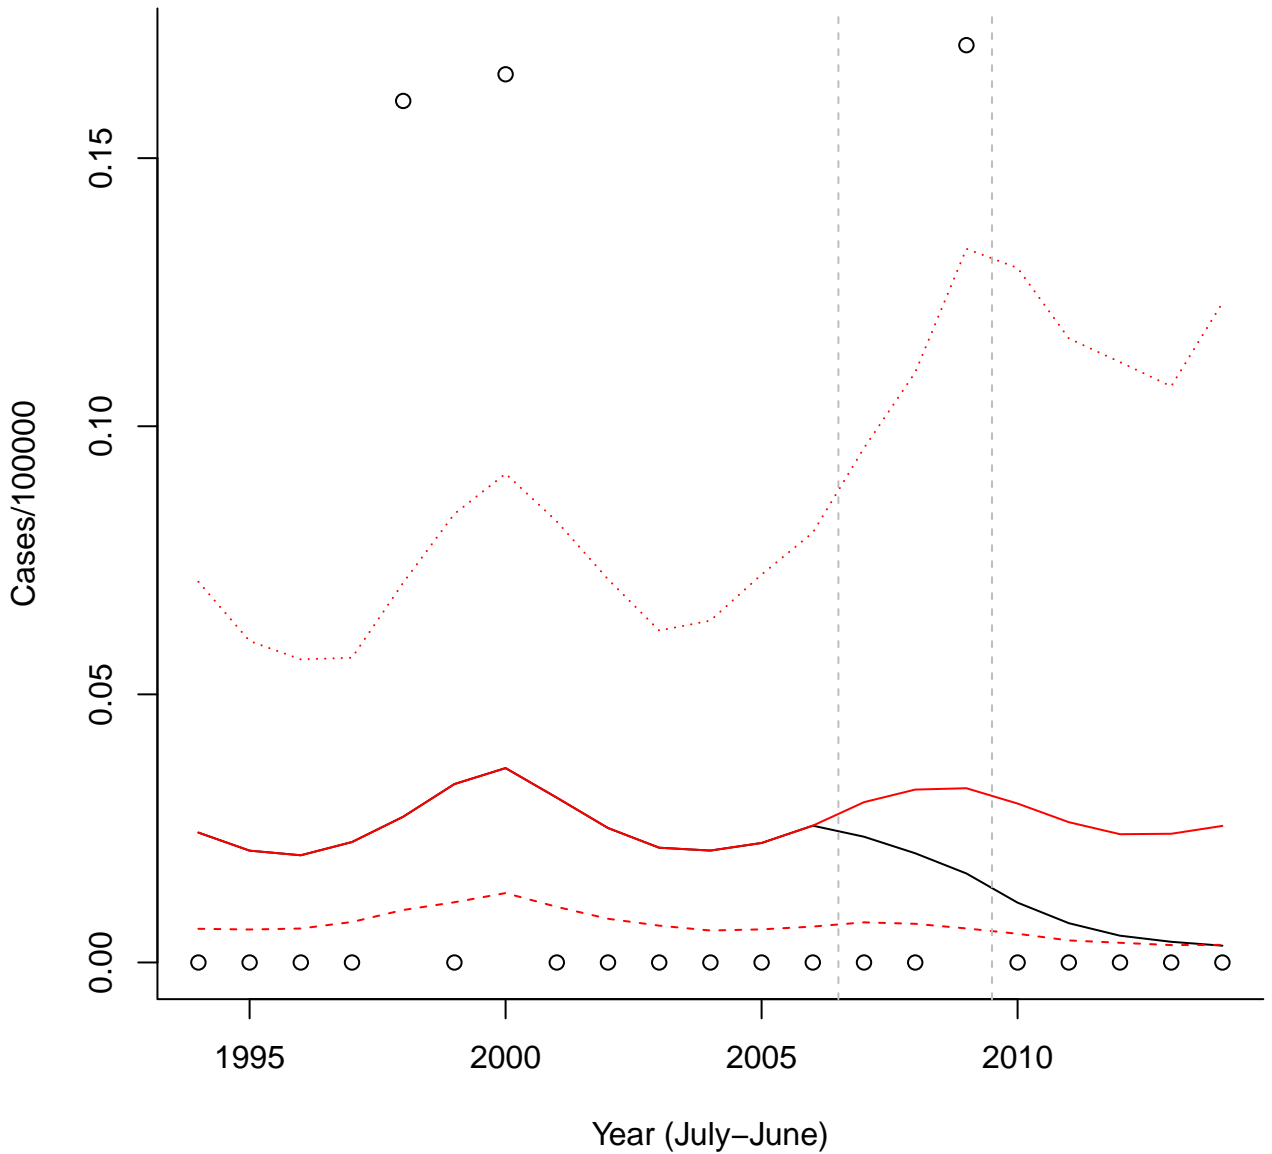

# 65+y Without comorbidity Serotype 18C

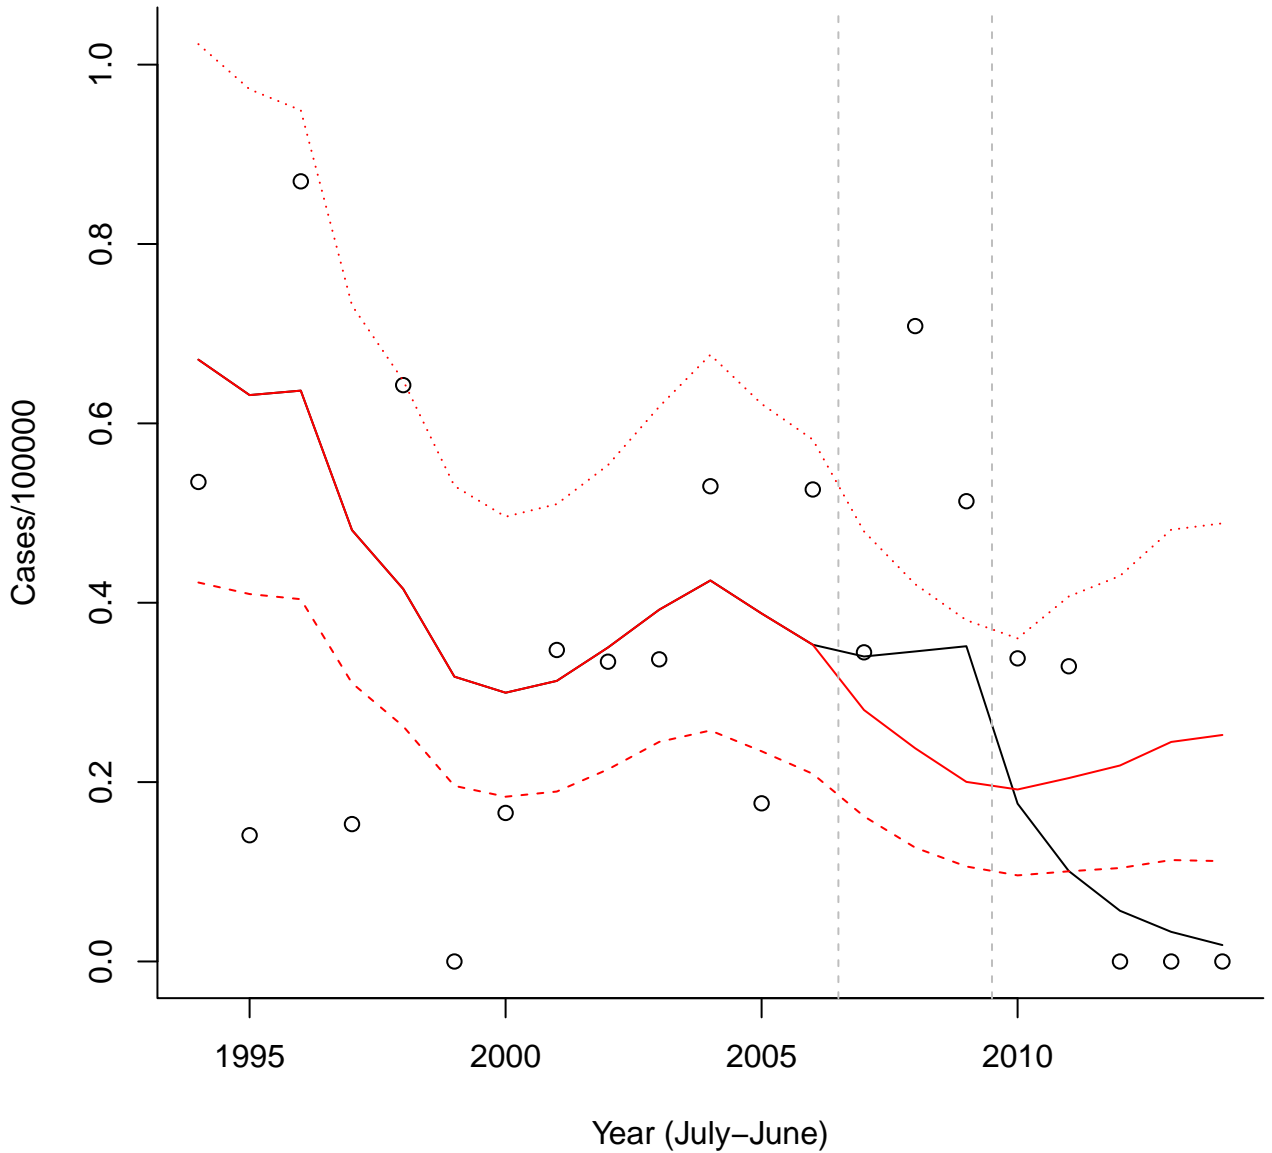

# 65+y Without comorbidity Serotype 18F

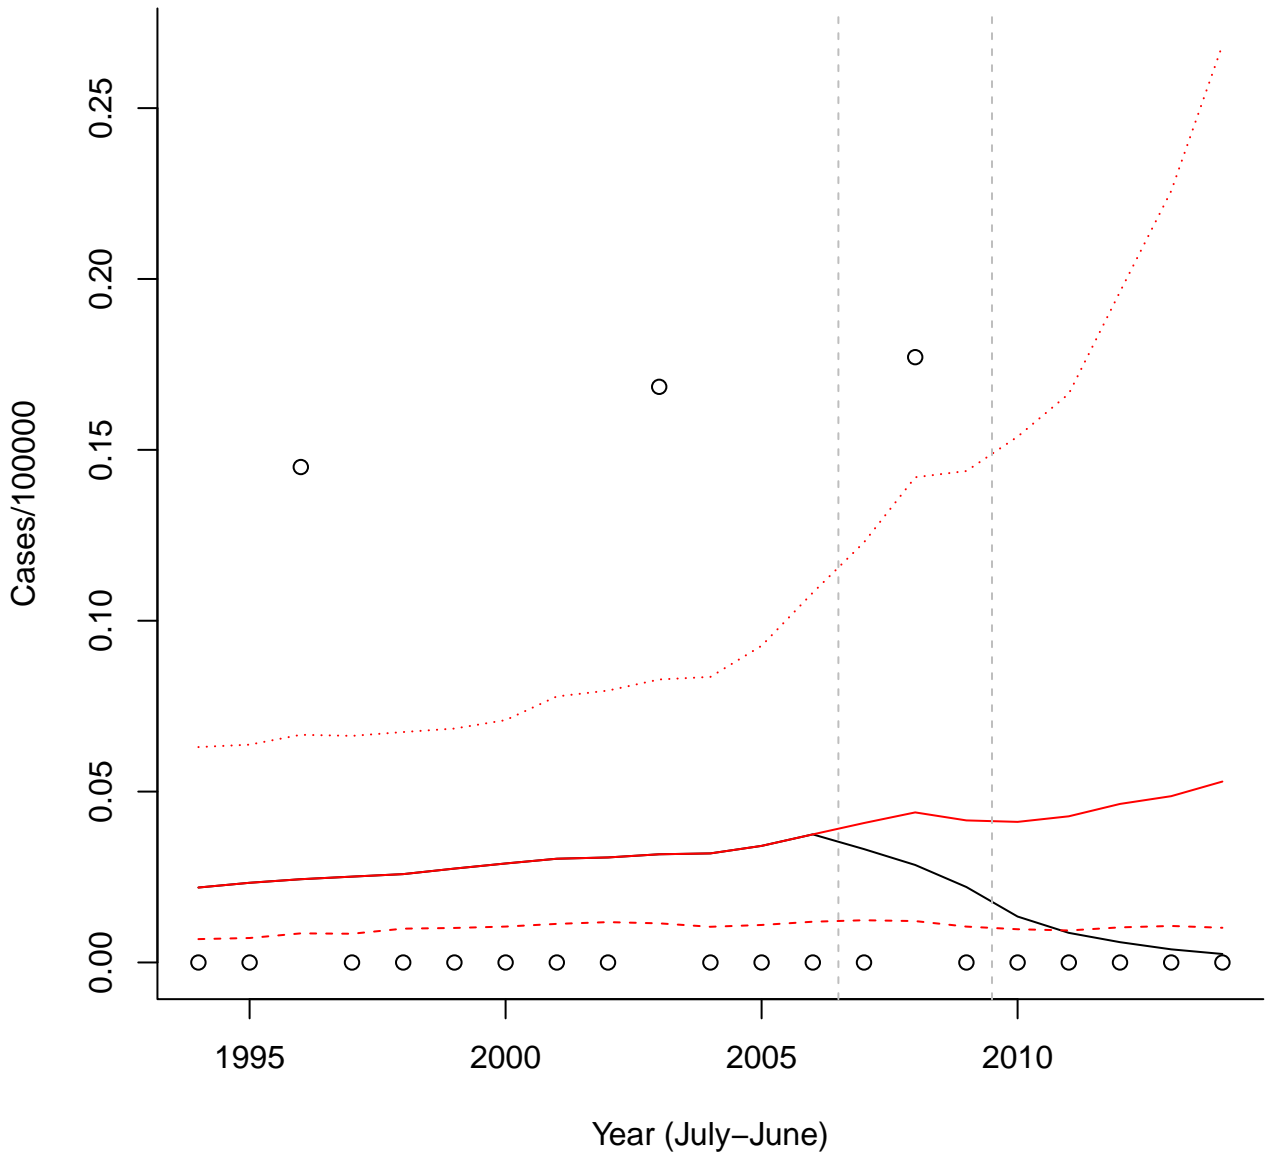

# 65+y Without comorbidity Serotype 19A

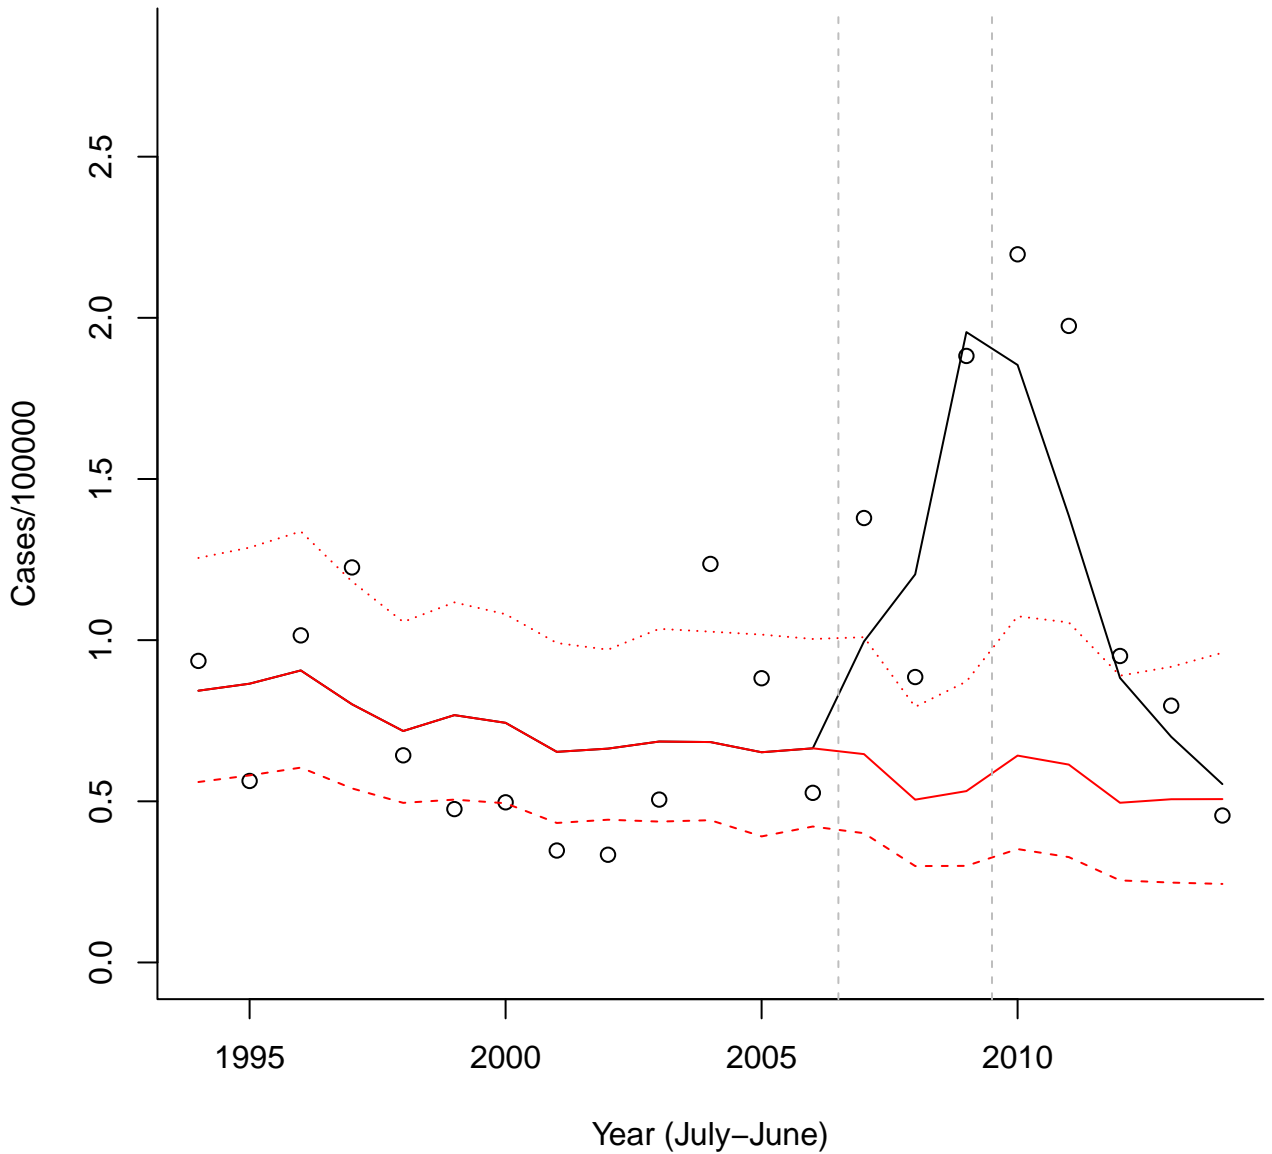

# 65+y Without comorbidity Serotype 19F

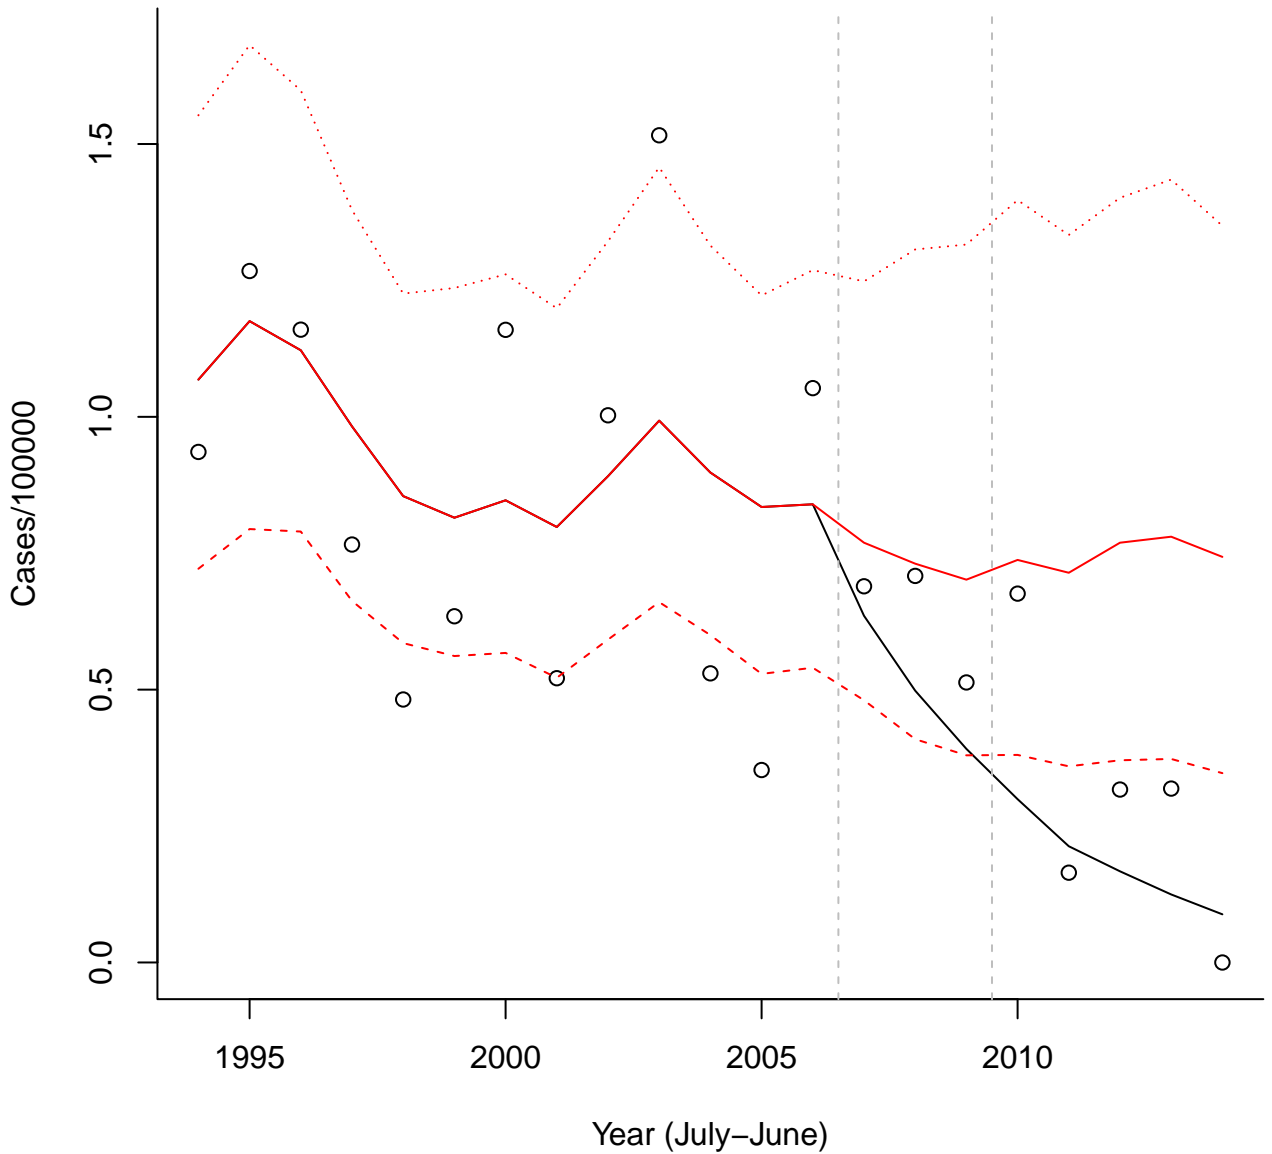

# 65+y Without comorbidity Serotype 2

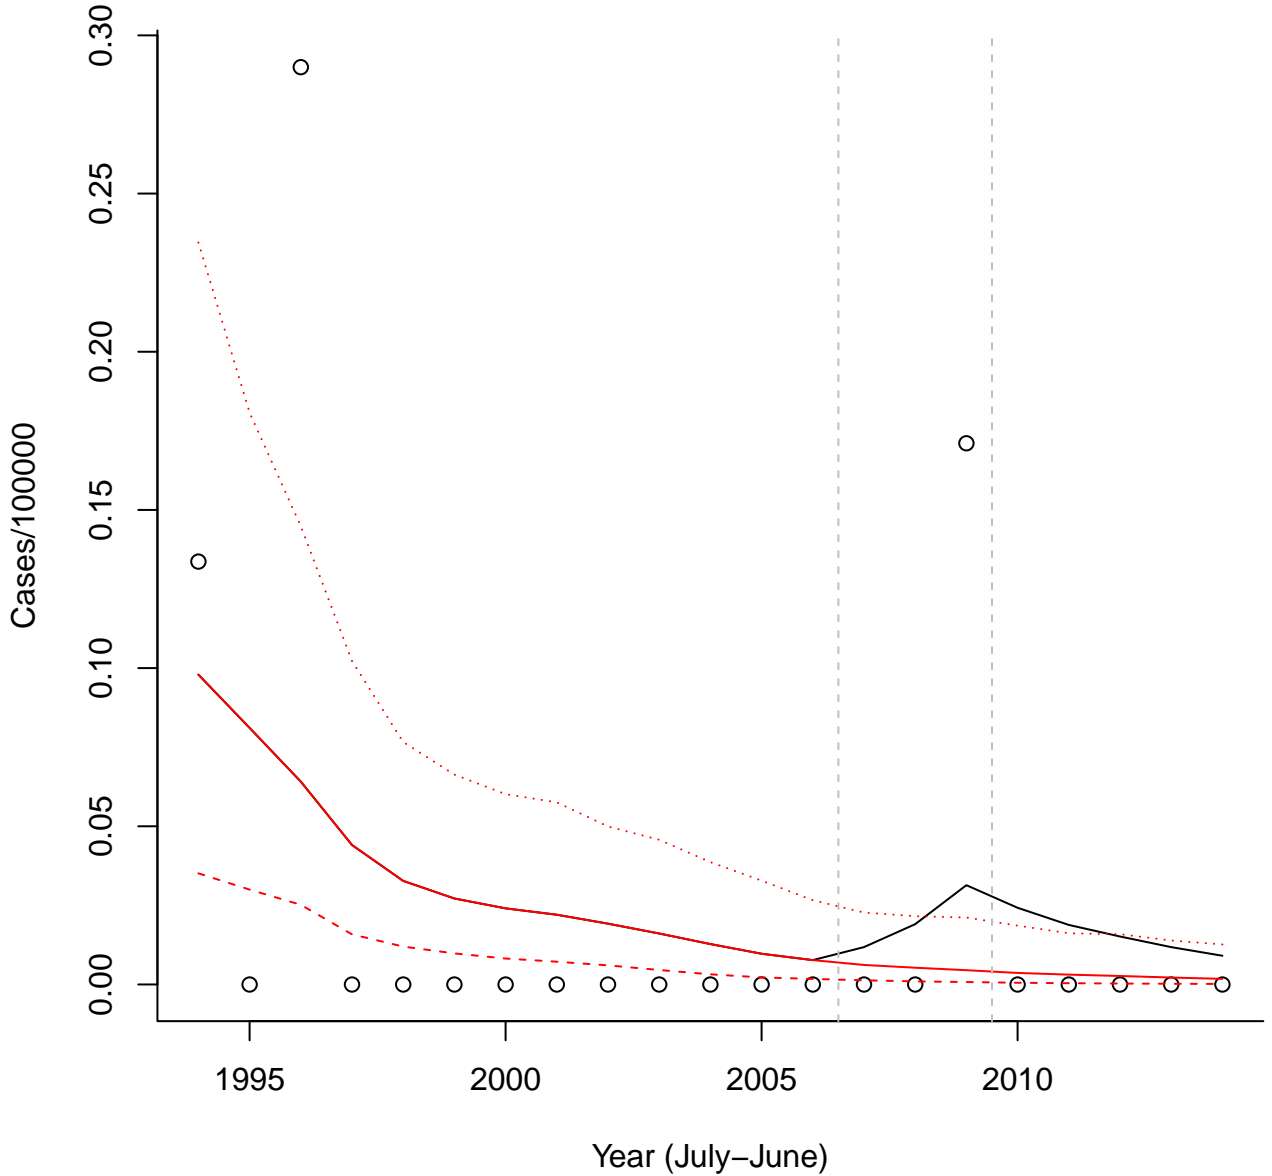

# 65+y Without comorbidity Serotype 20

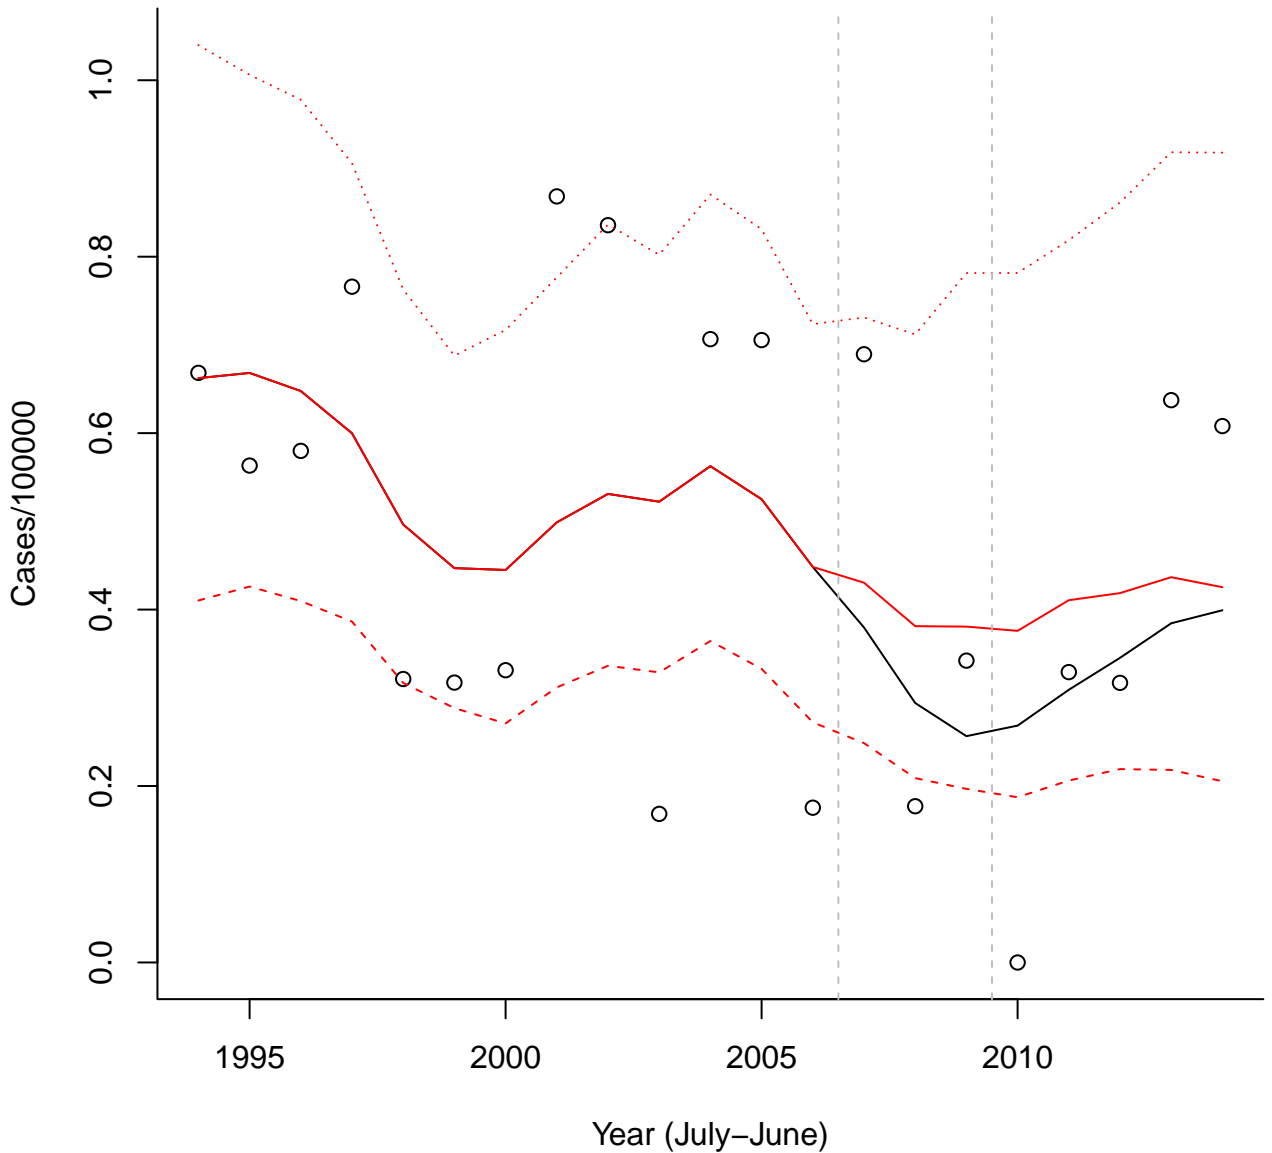

# 65+y Without comorbidity Serotype 21

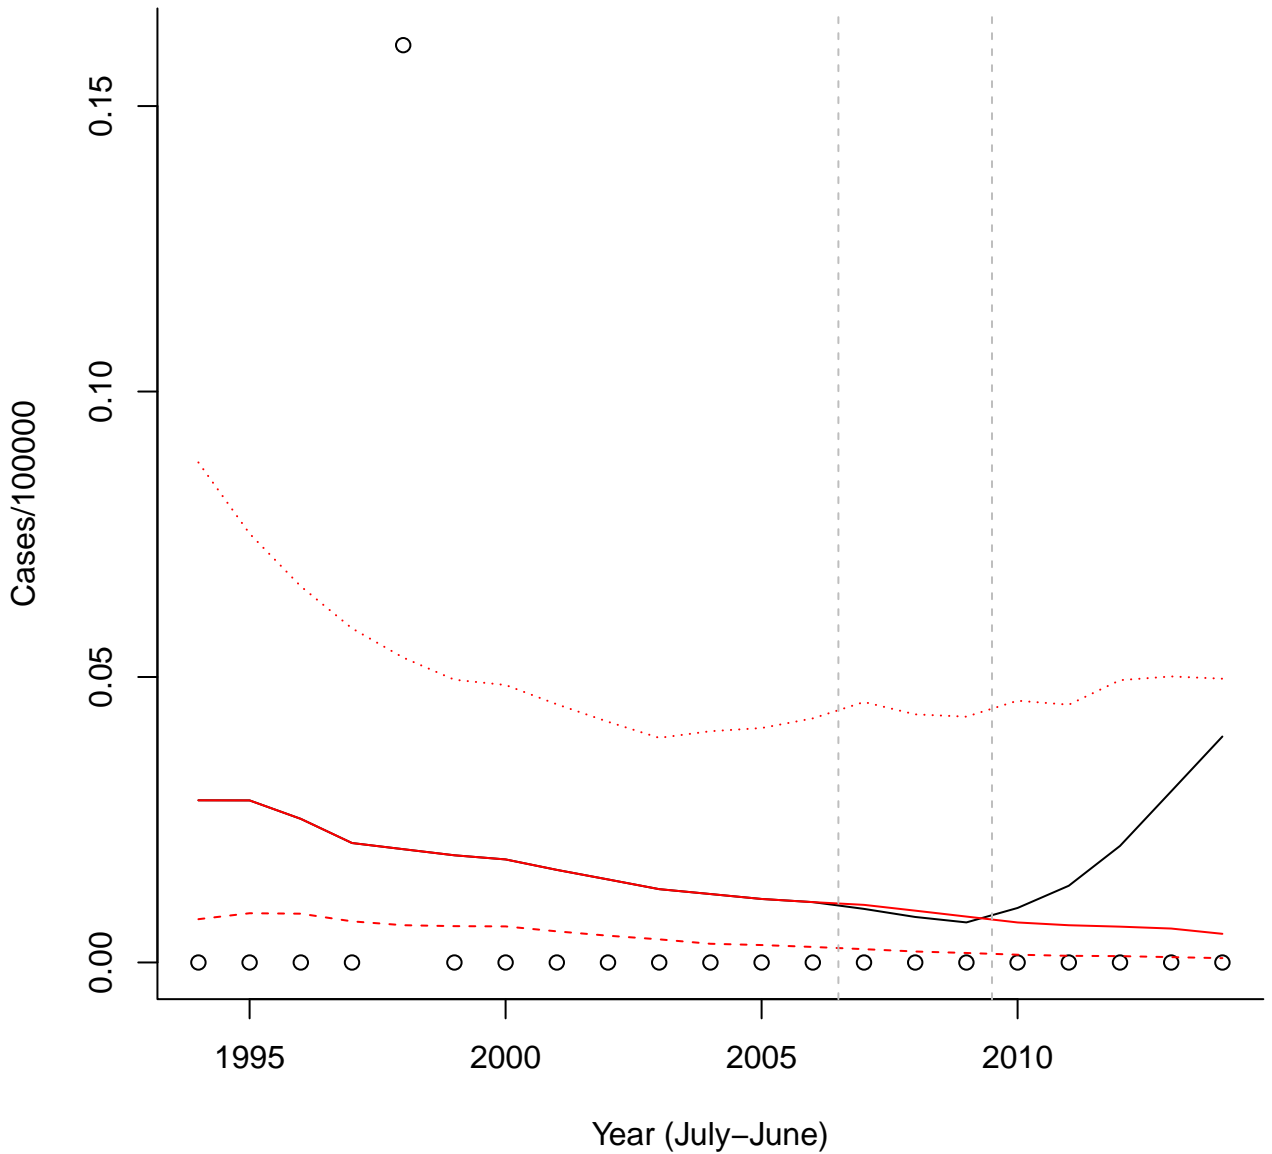



# 65+y Without comorbidity Serotype 22F

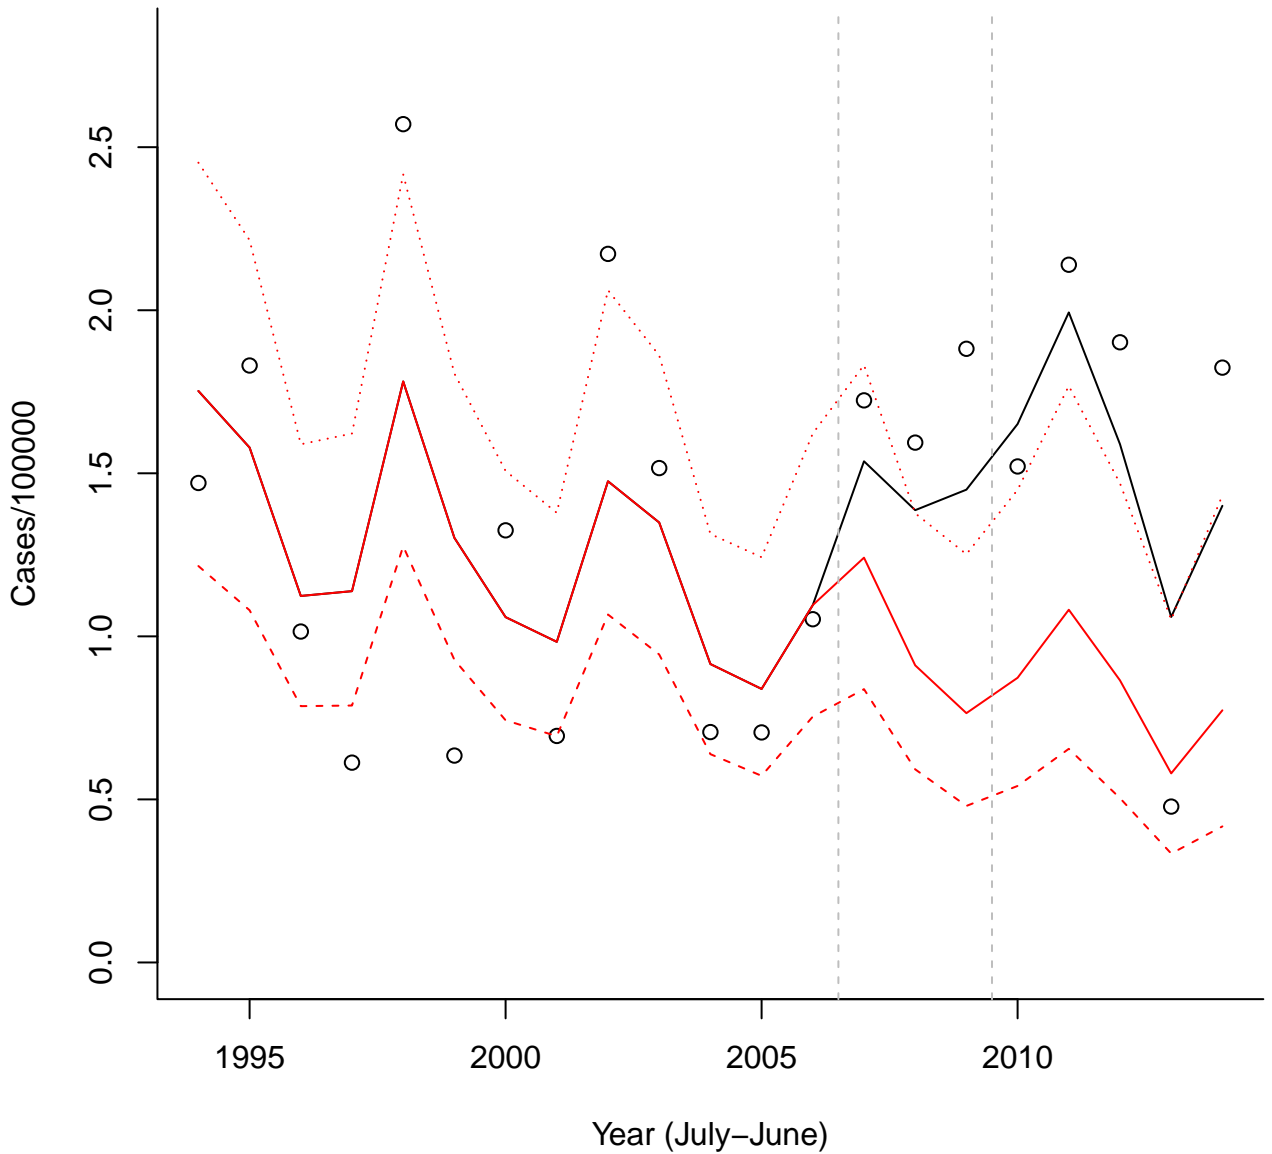

# 65+y Without comorbidity Serotype 23A

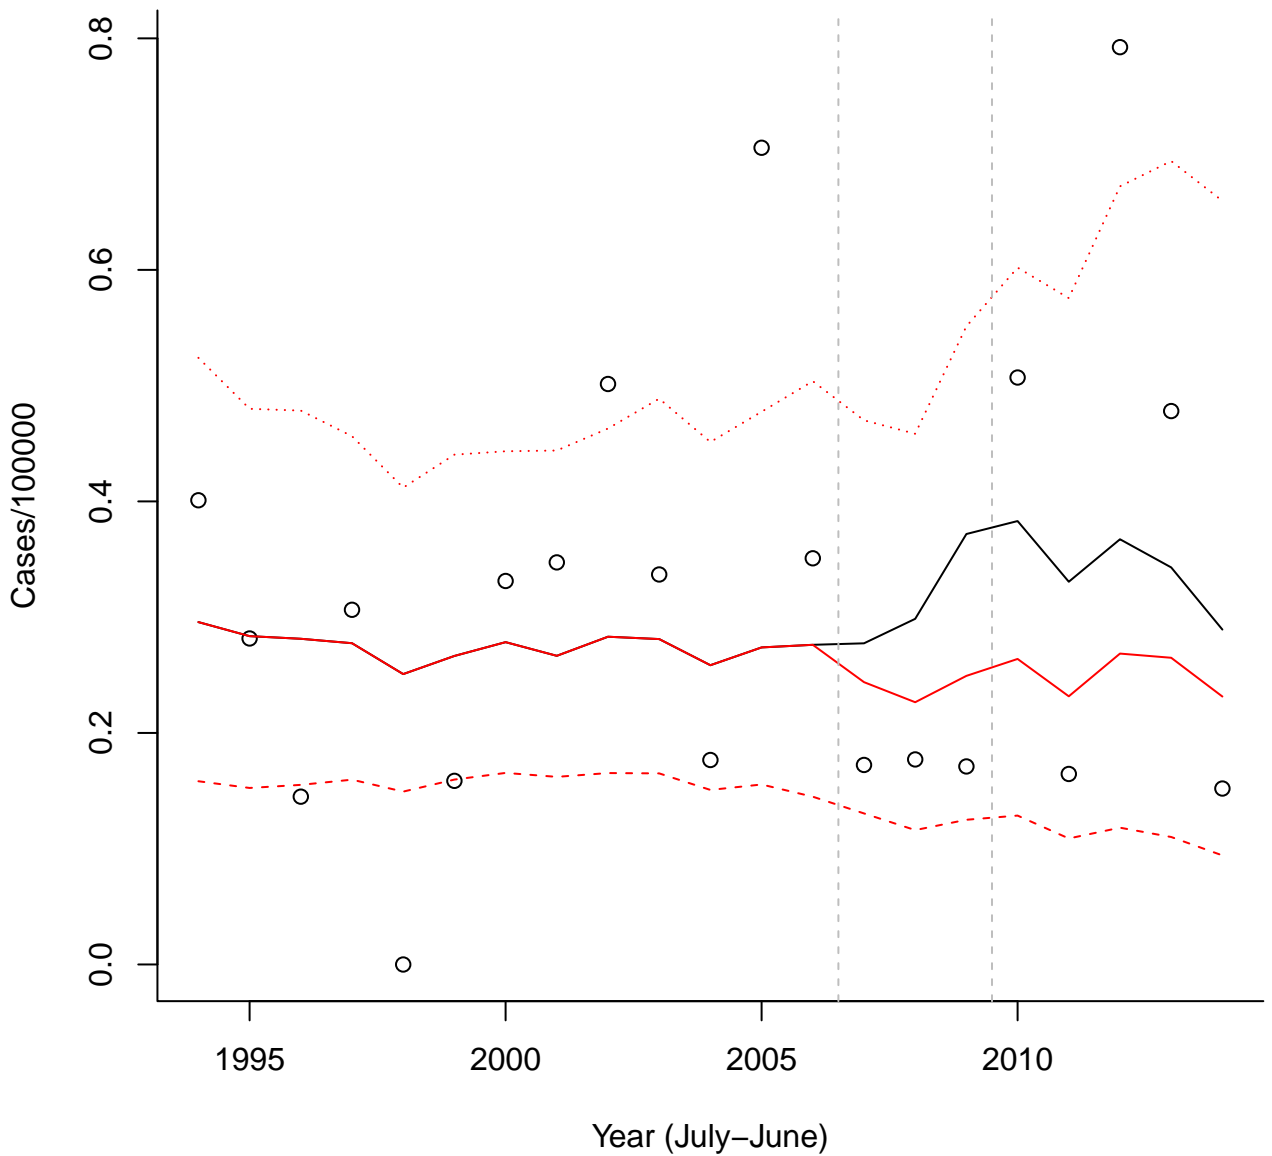

# 65+y Without comorbidity Serotype 23B

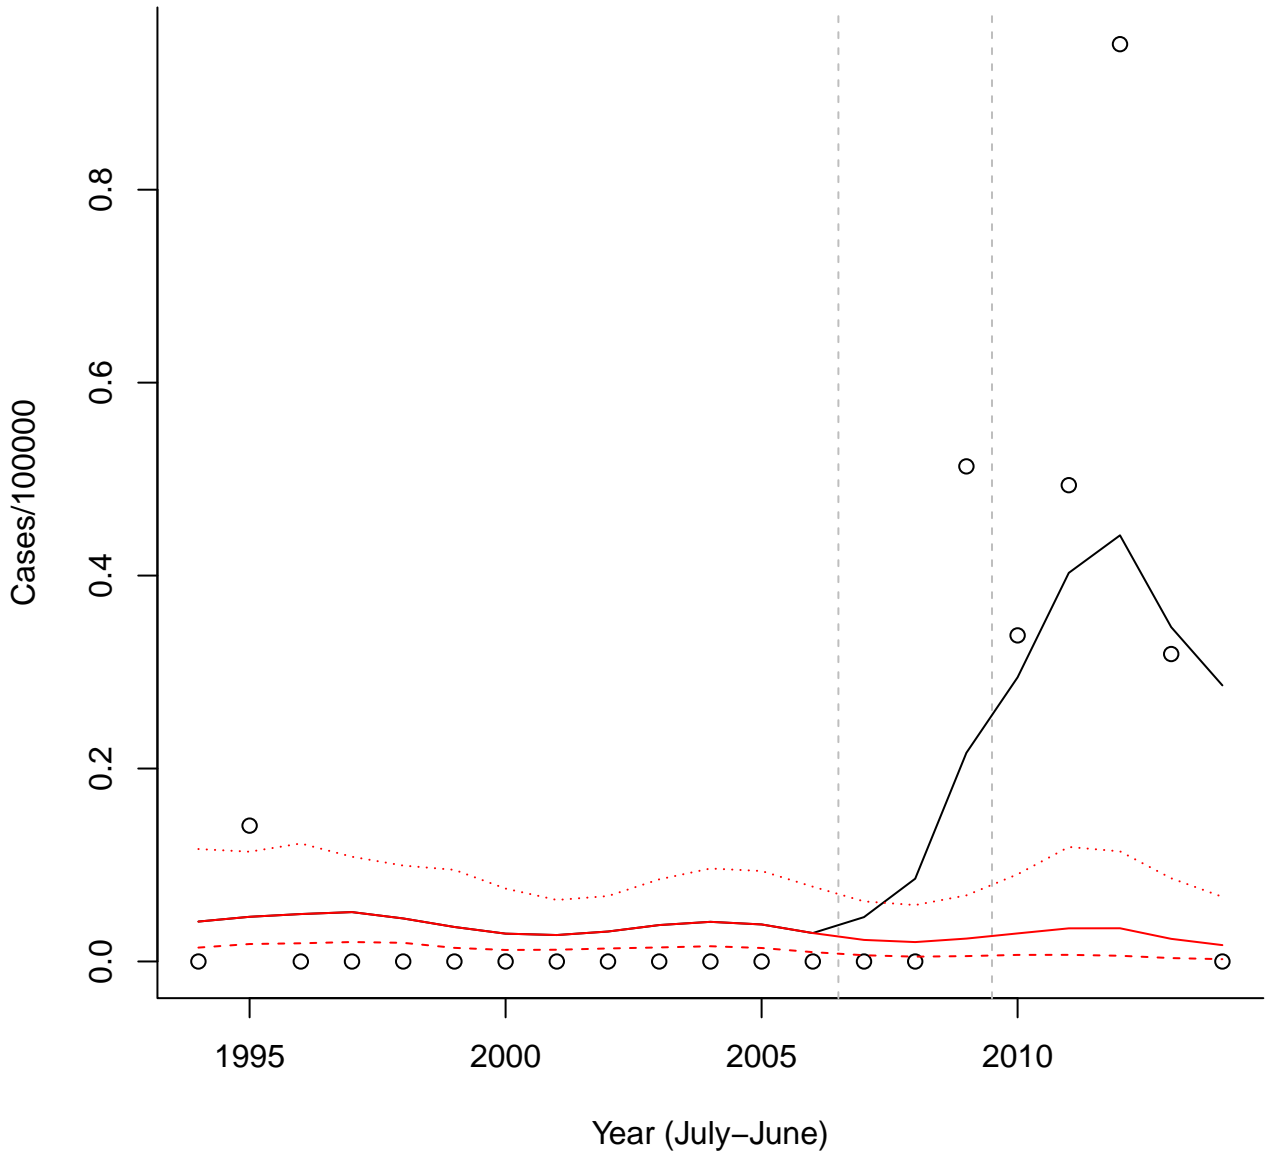

# 65+y Without comorbidity Serotype 23F

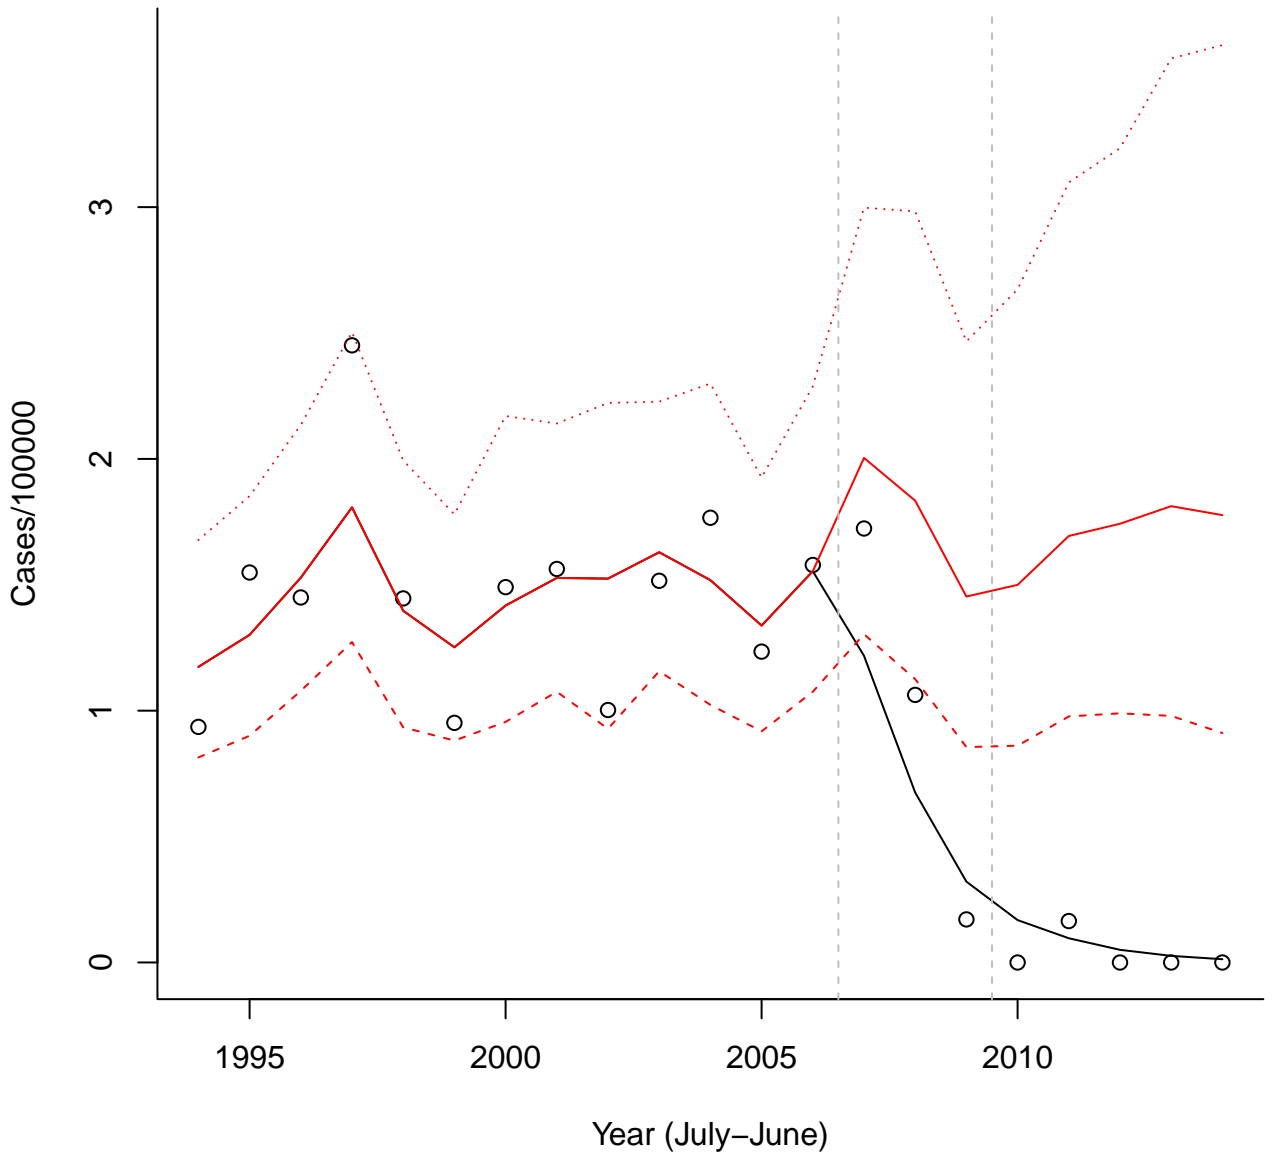

# 65+y Without comorbidity Serotype 24F

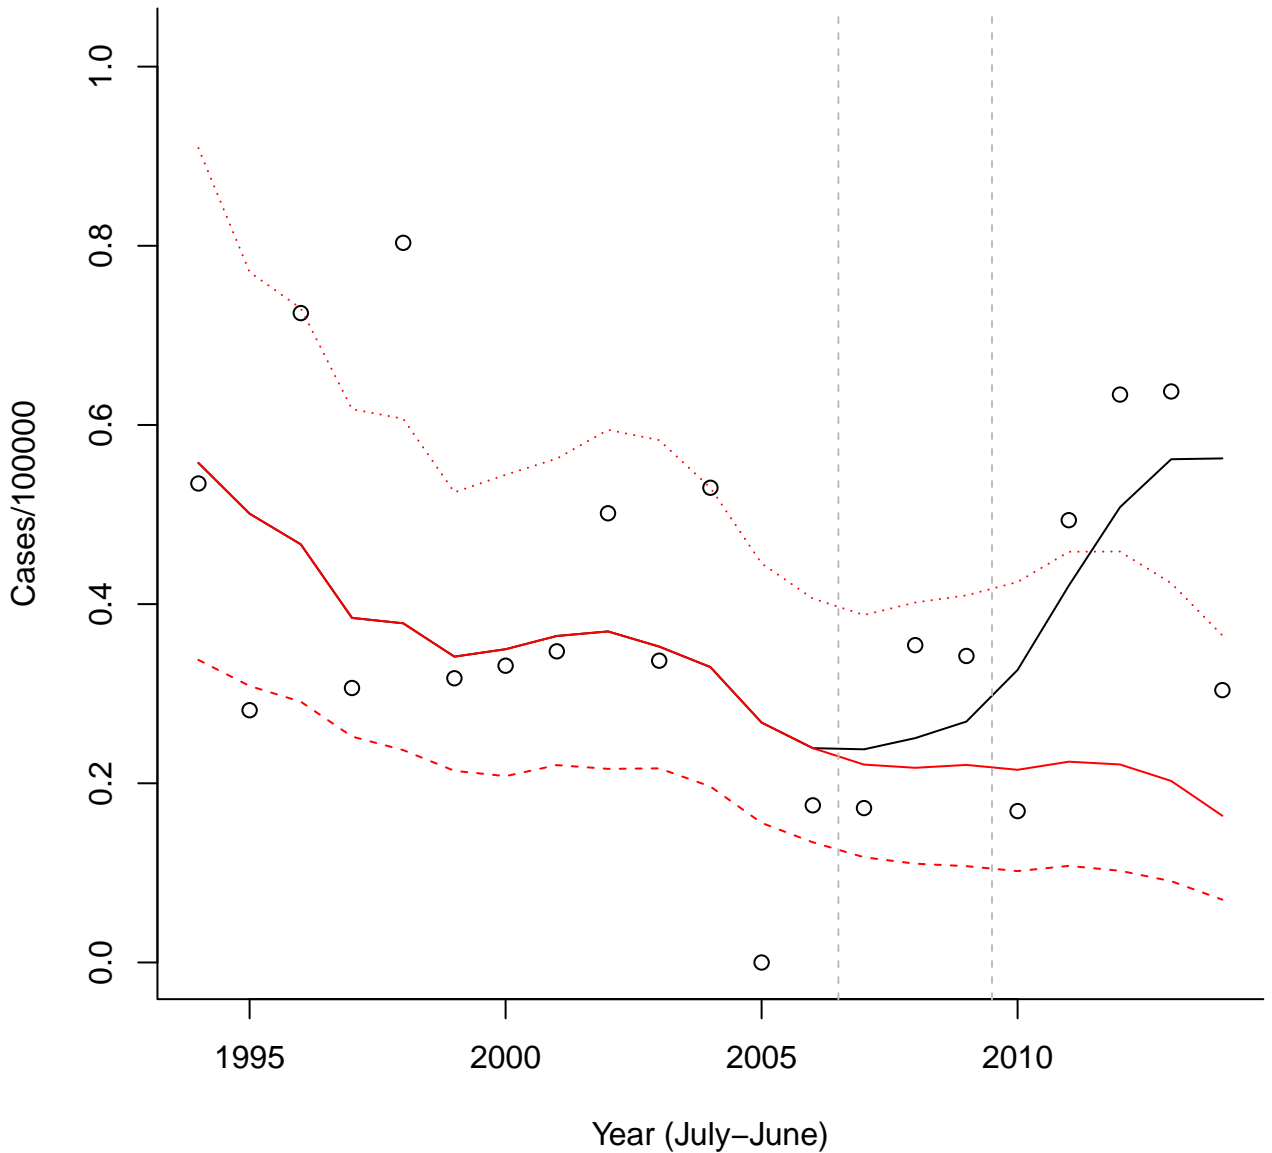

# 65+y Without comorbidity Serotype 27

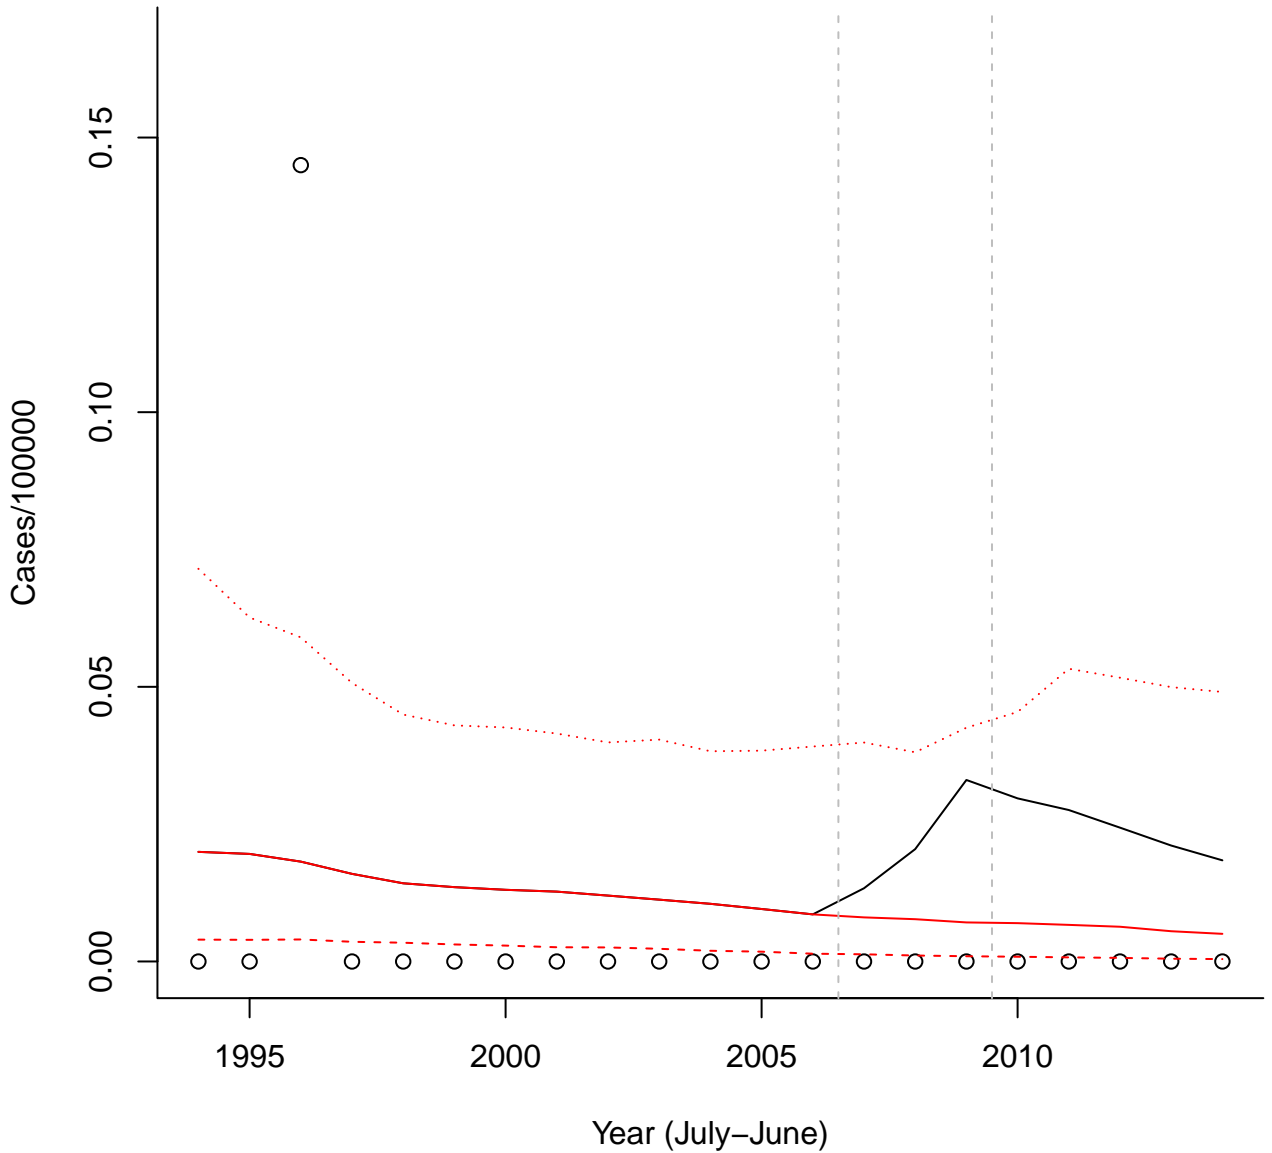

# 65+y Without comorbidity Serotype 29

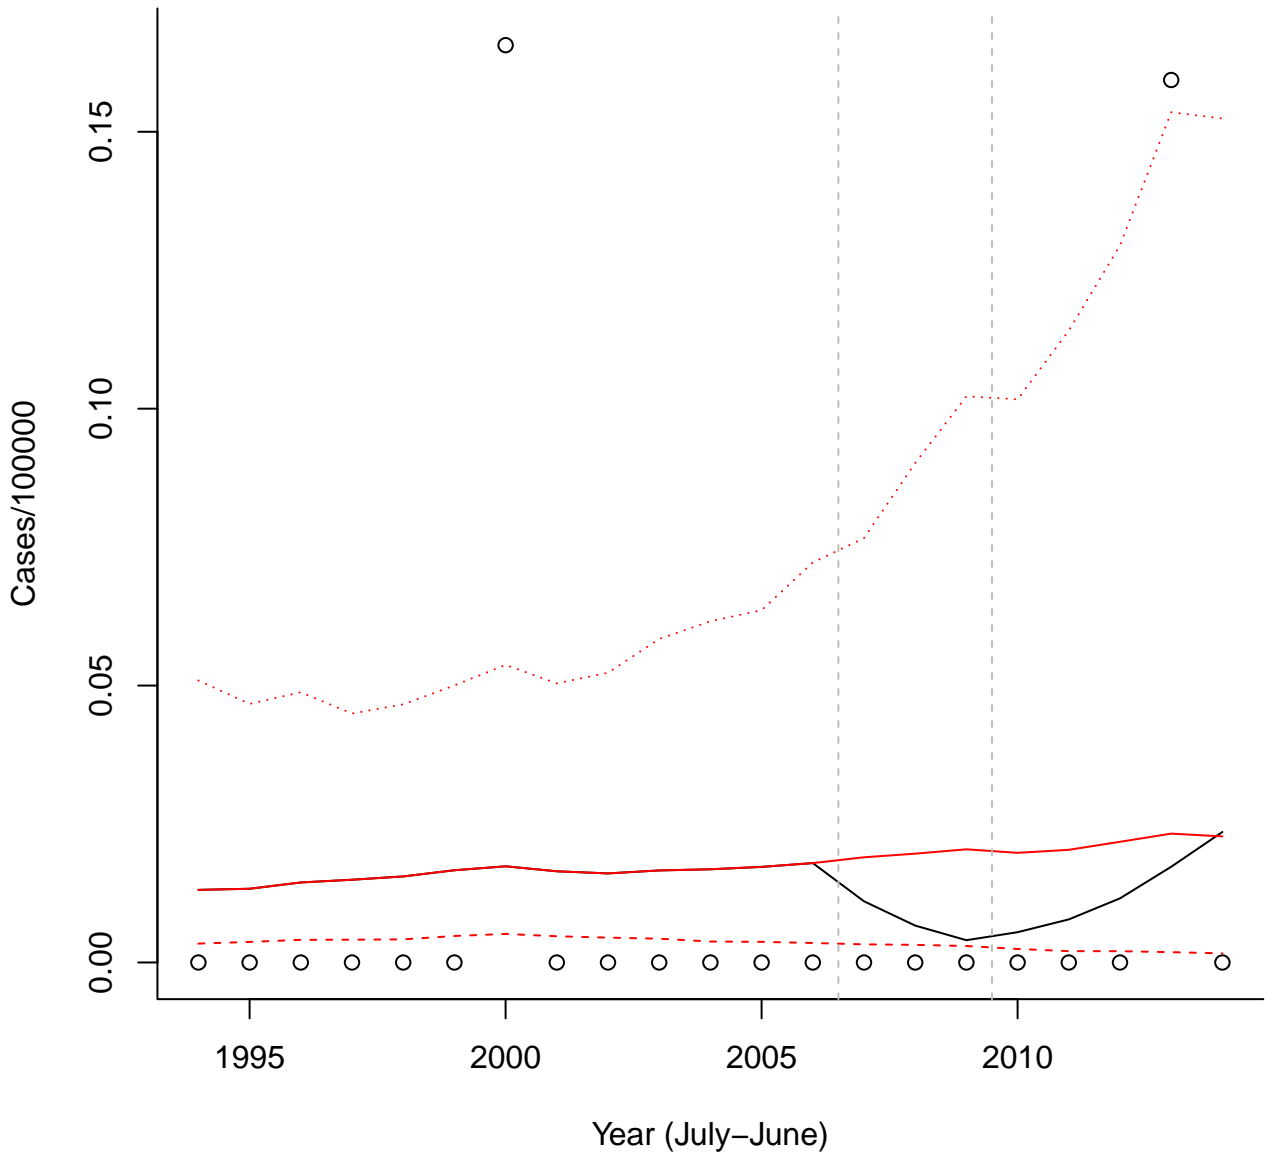

# 65+y Without comorbidity Serotype 3

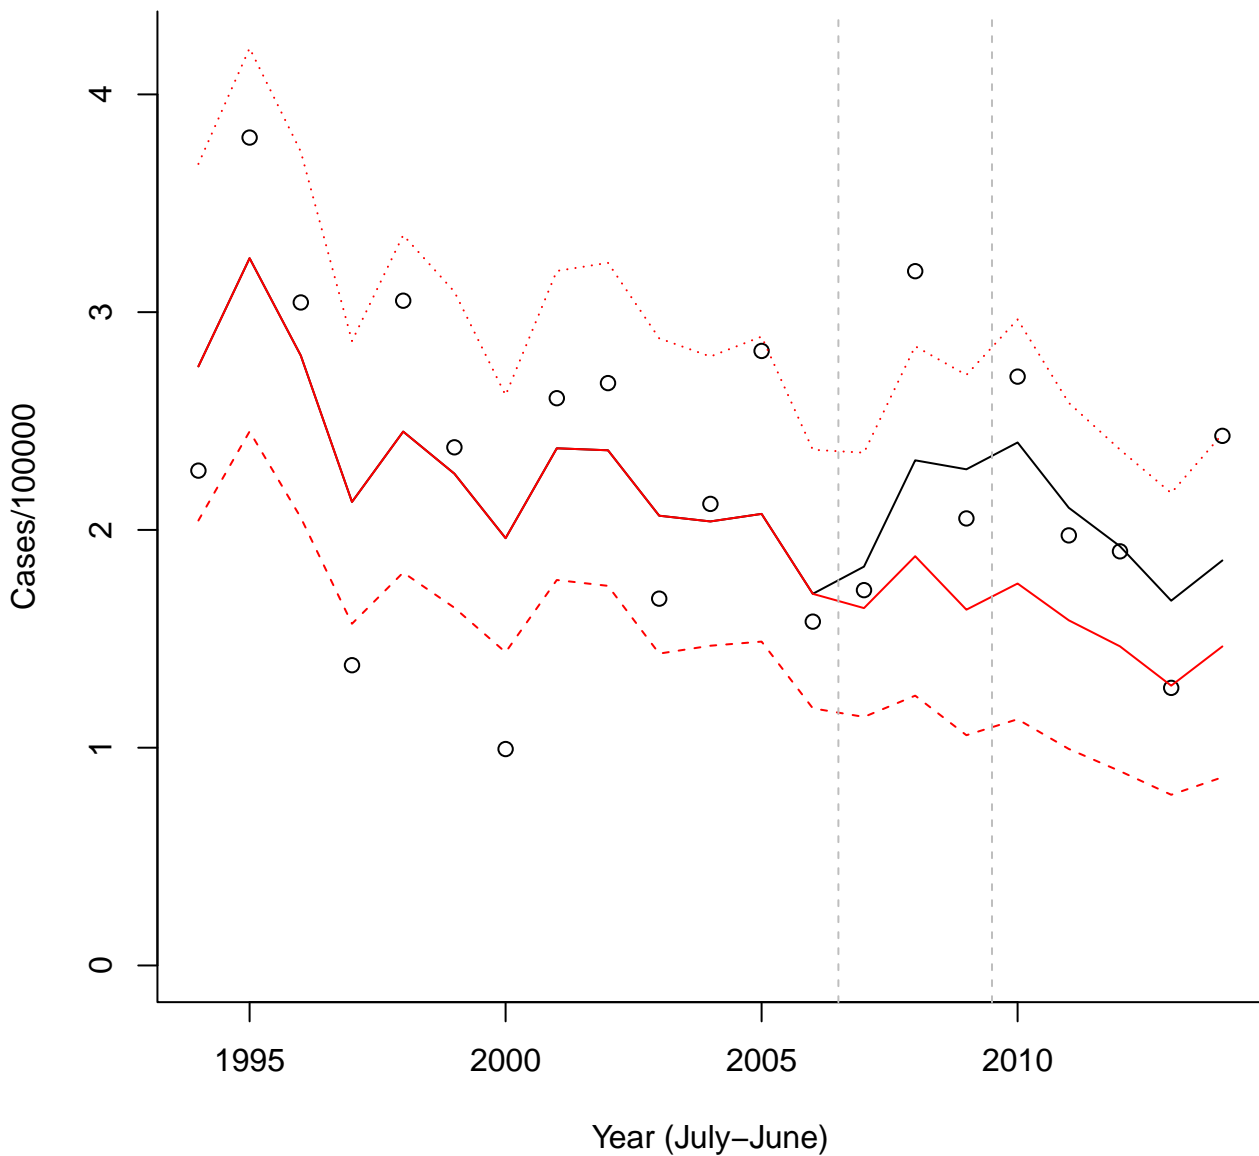



# 65+y Without comorbidity Serotype 31

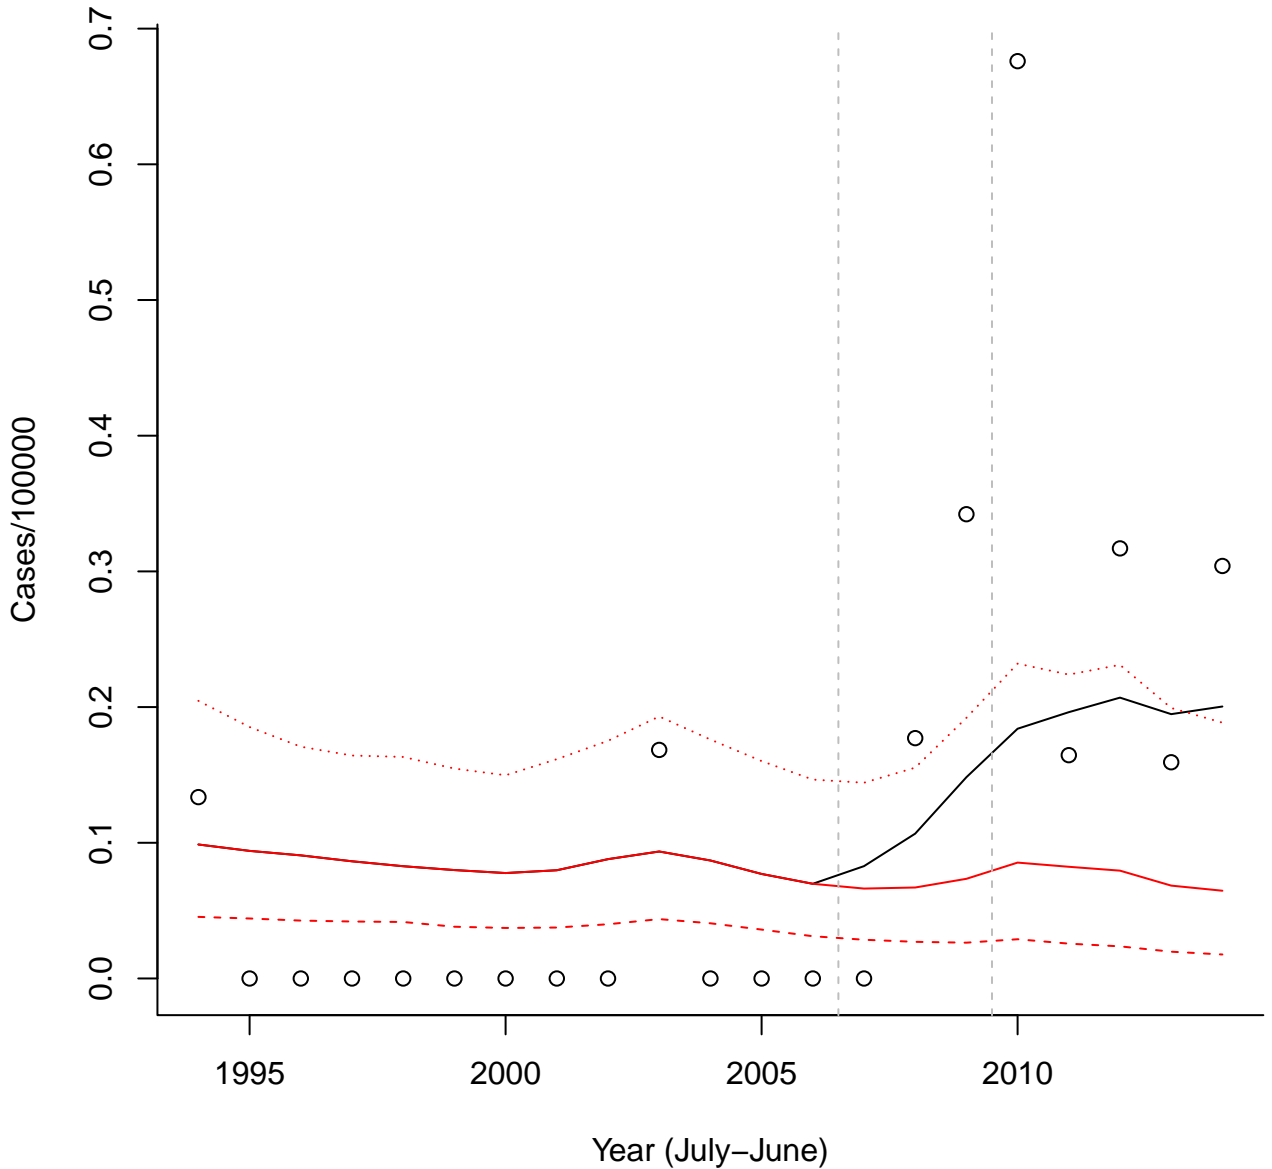

# 65+y Without comorbidity Serotype 32A

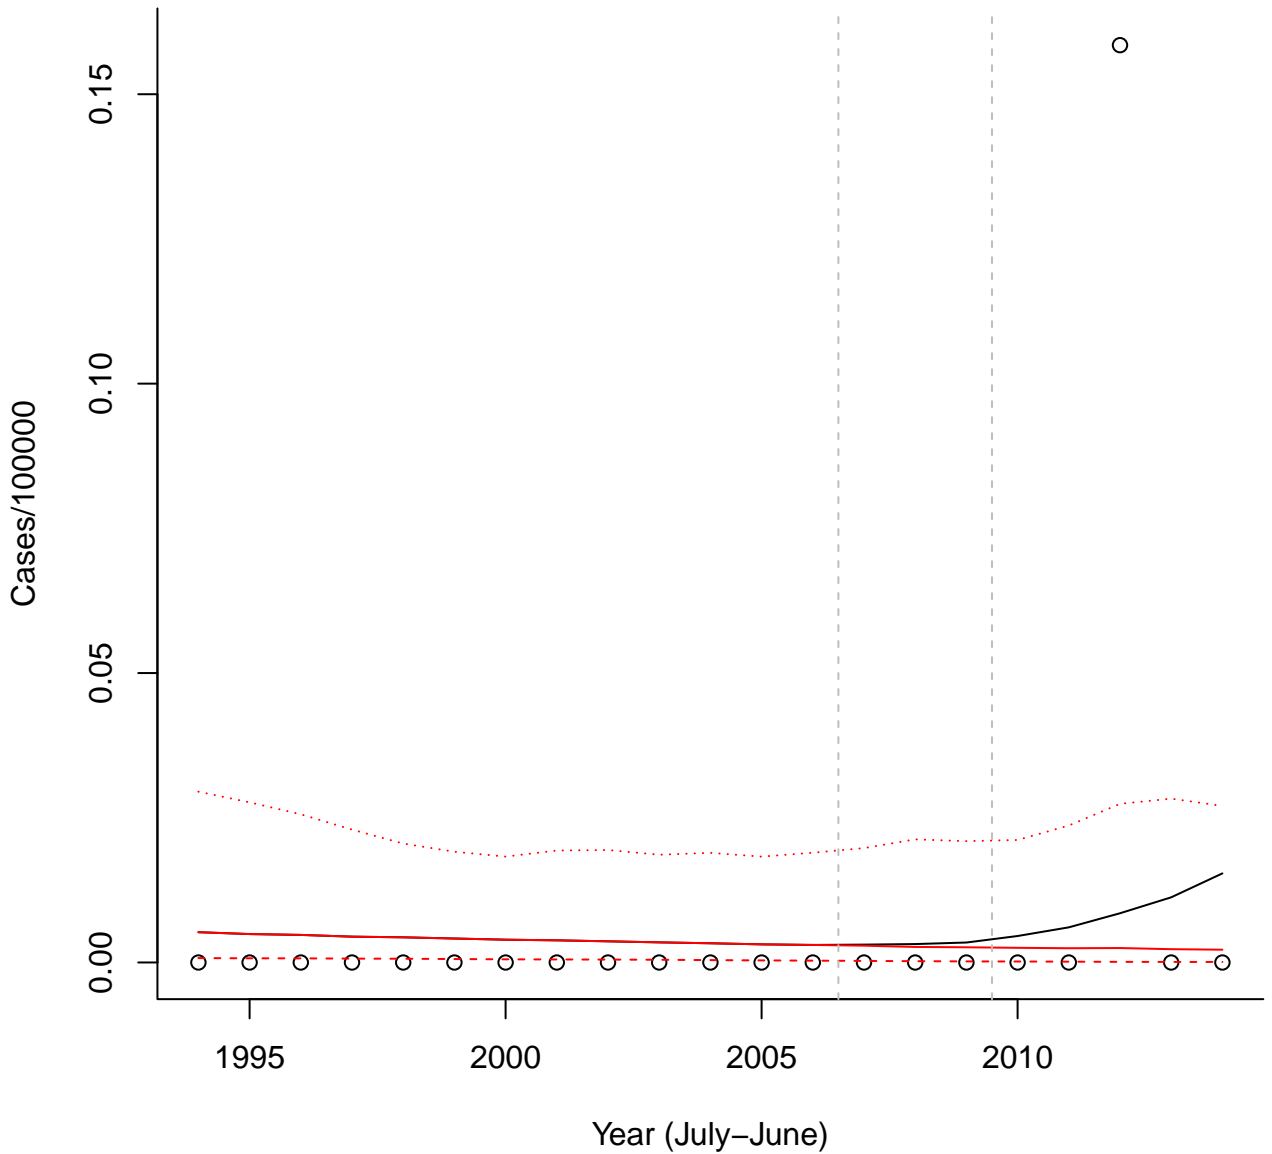

# 65+y Without comorbidity Serotype 33A

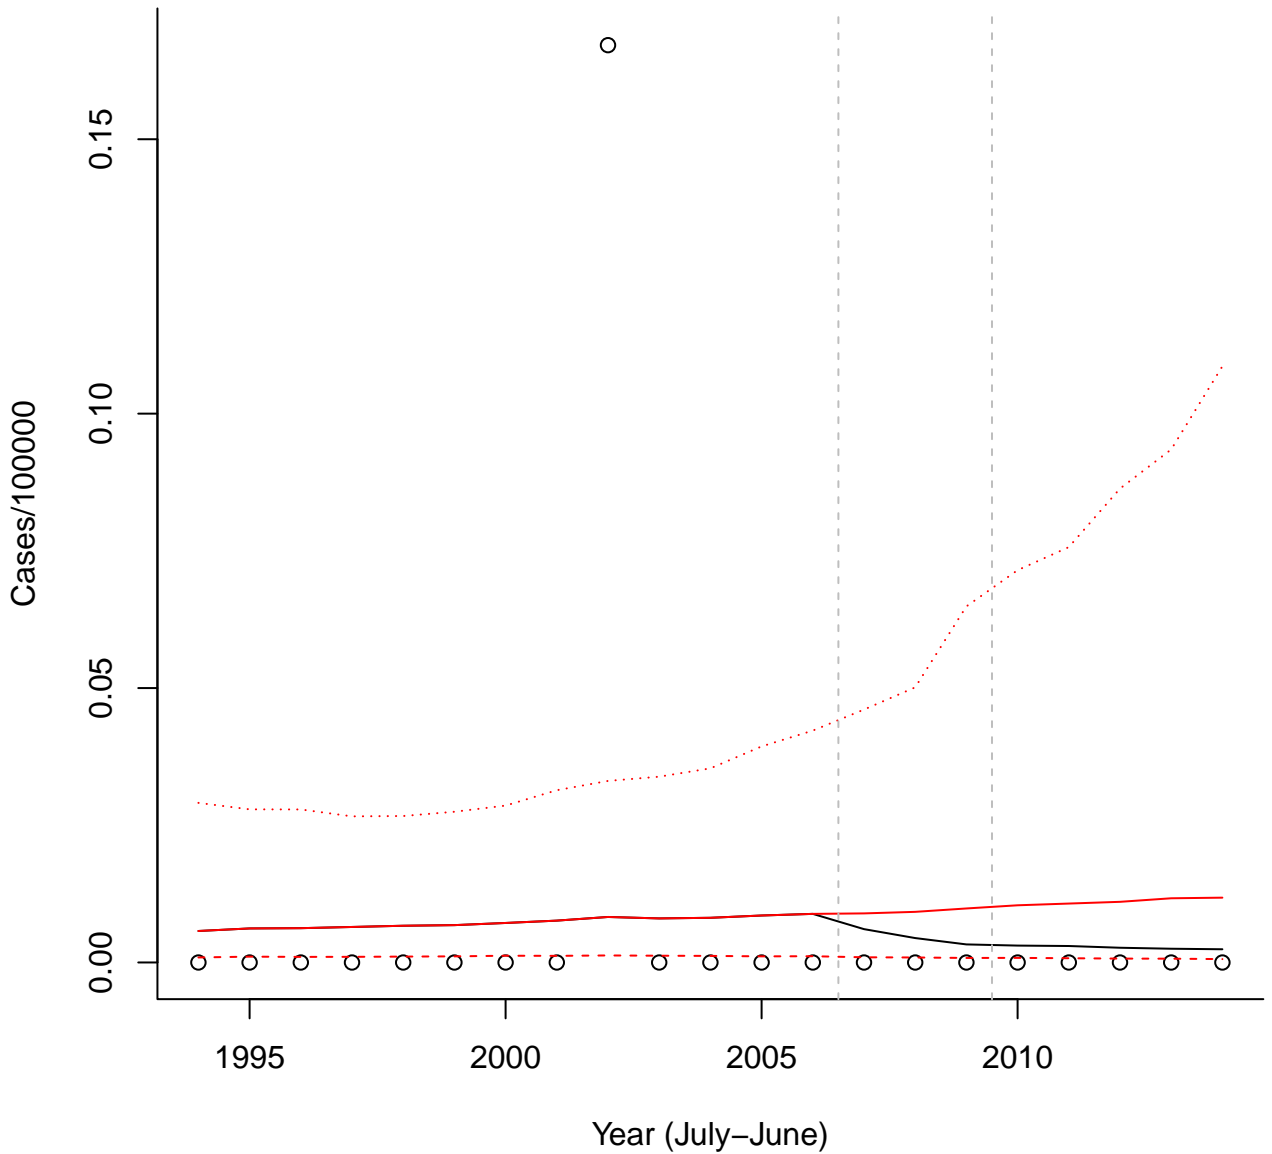

# 65+y Without comorbidity Serotype 33B

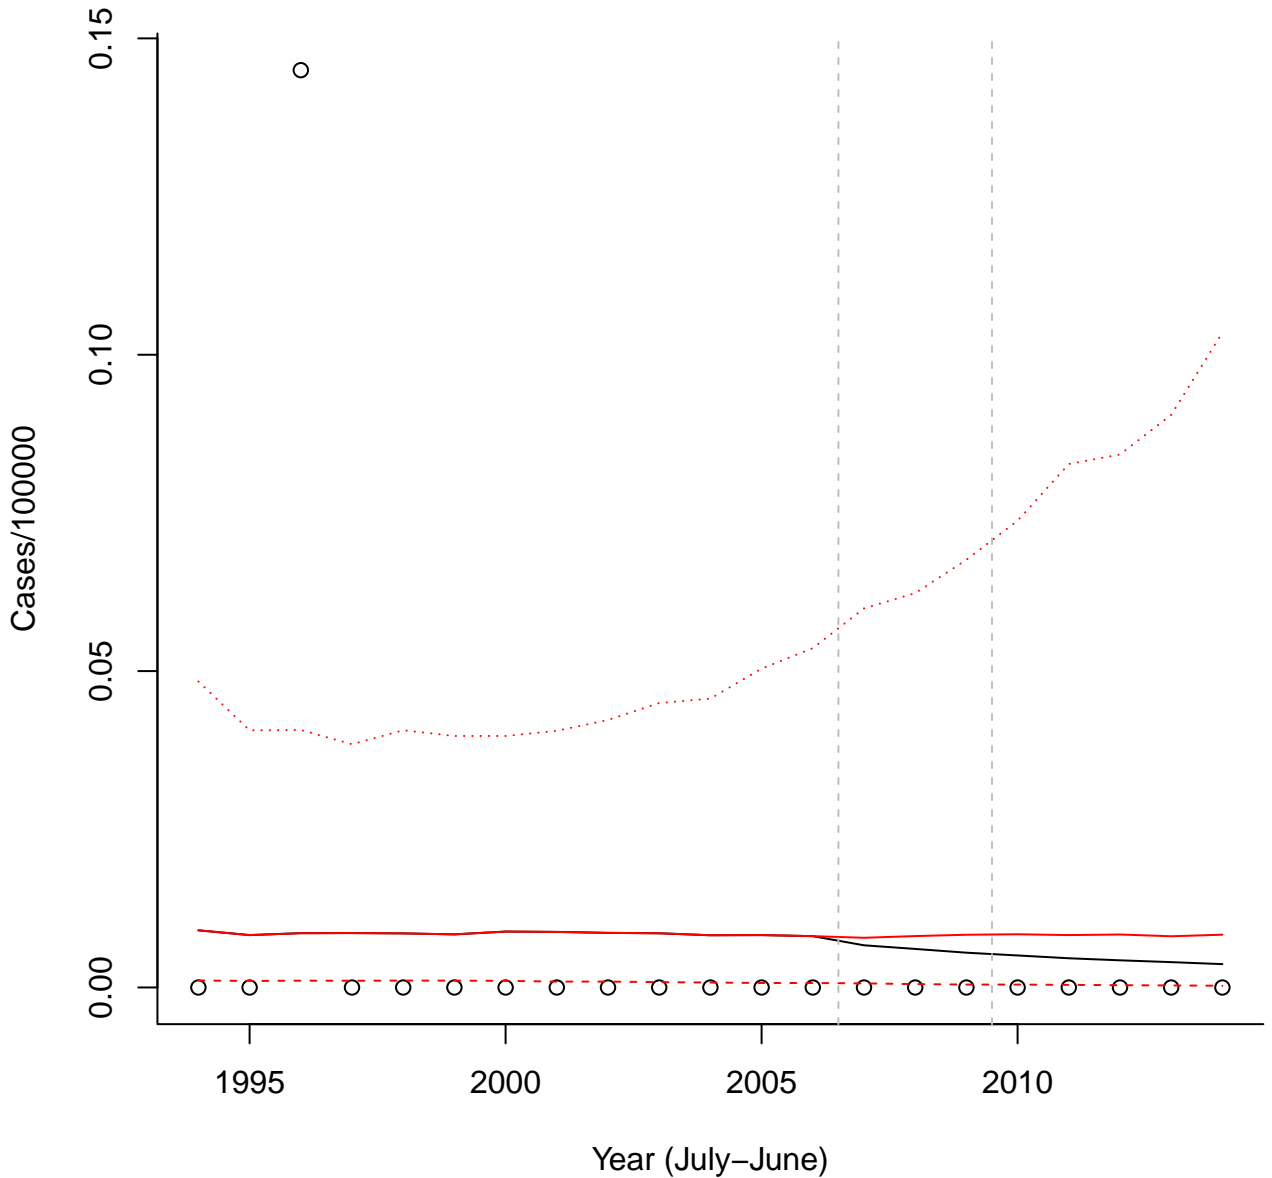

# 65+y Without comorbidity Serotype 33F

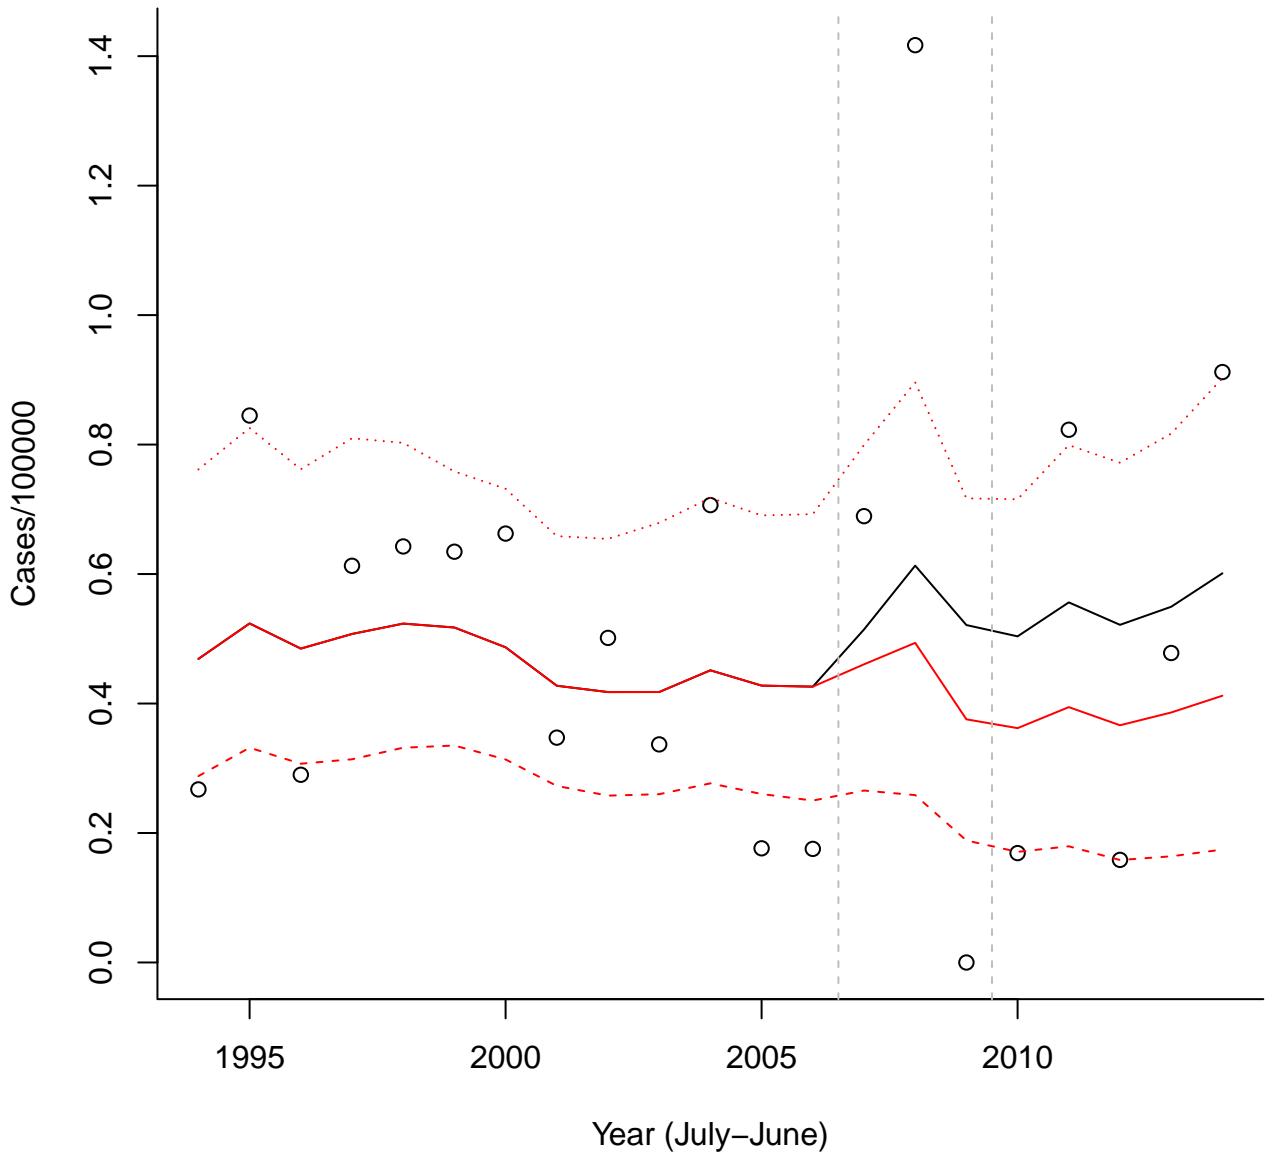

# 65+y Without comorbidity Serotype 34

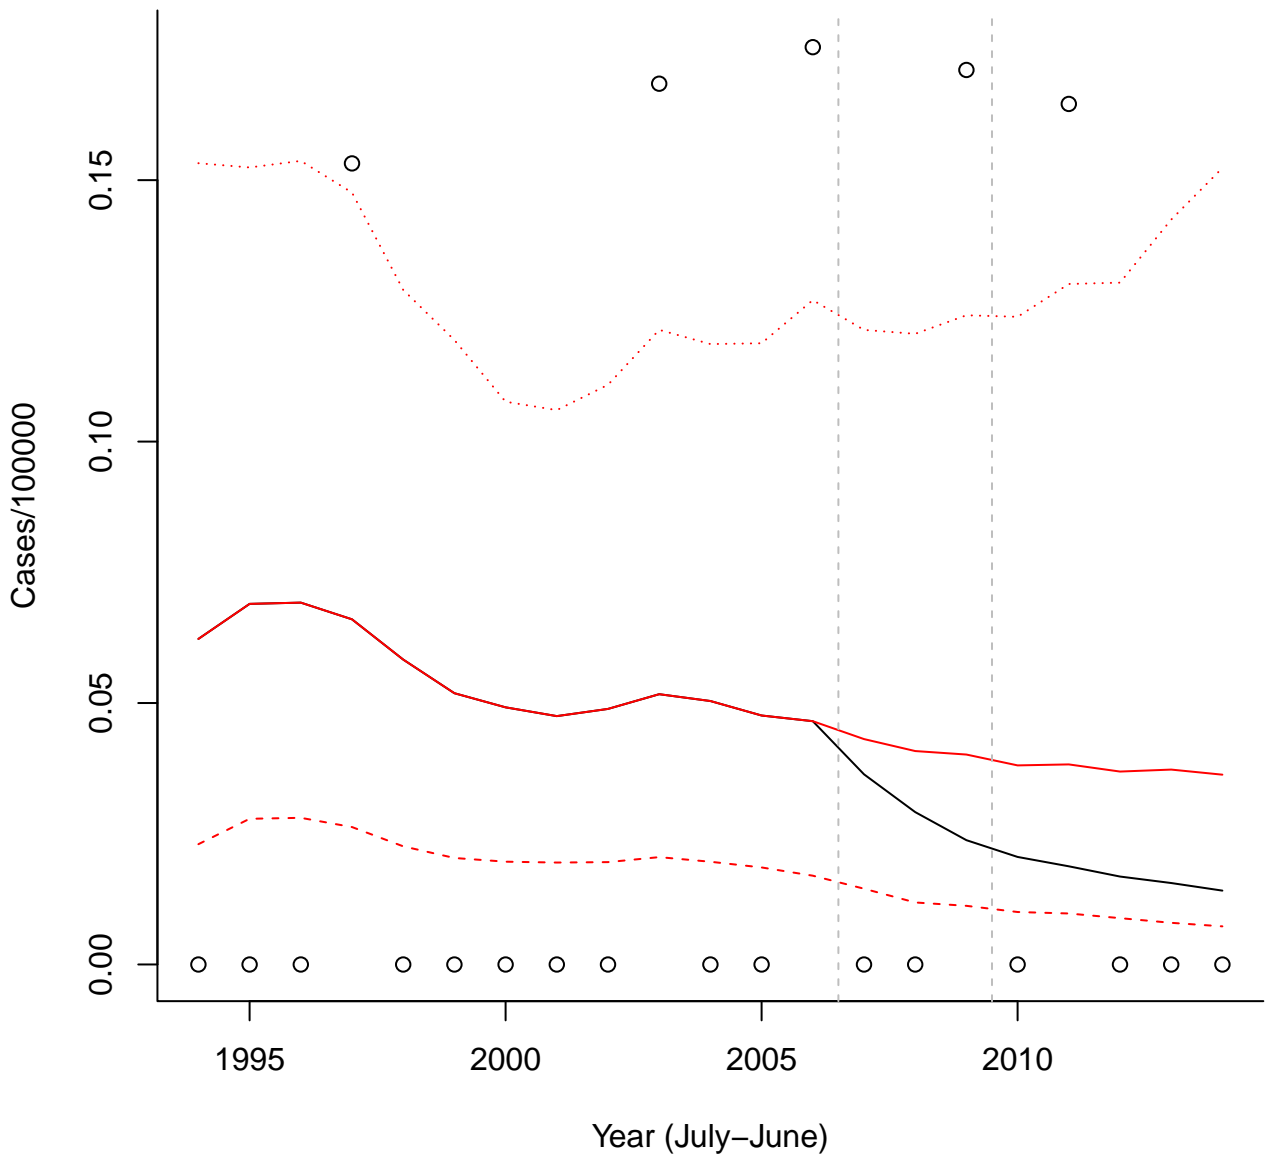

# 65+y Without comorbidity Serotype 35B

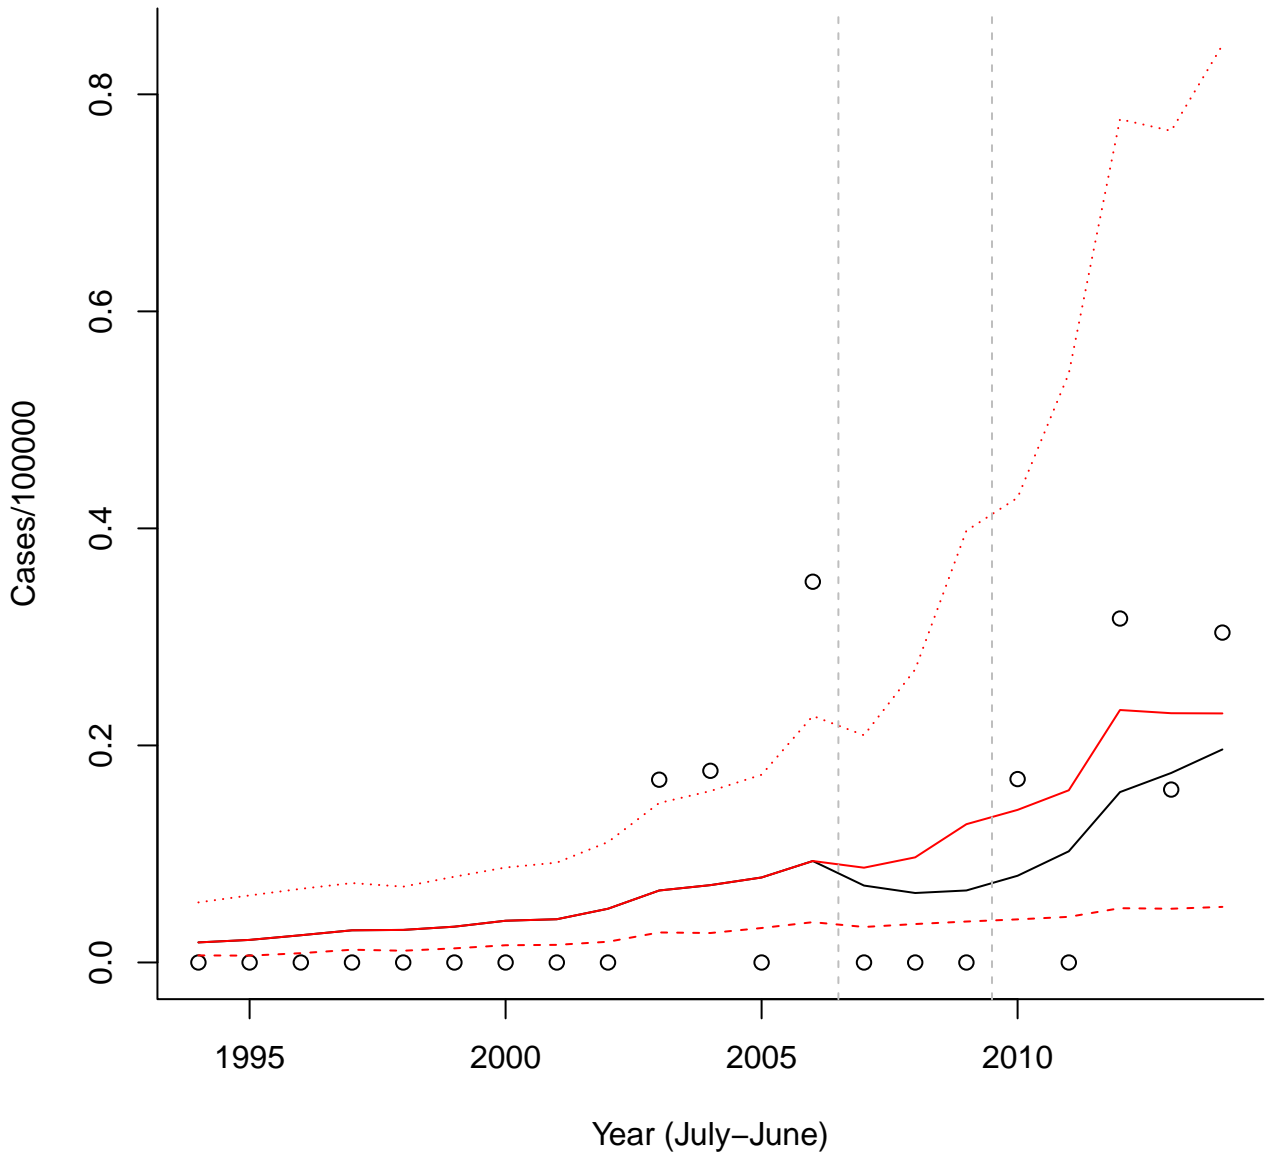

# 65+y Without comorbidity Serotype 35F

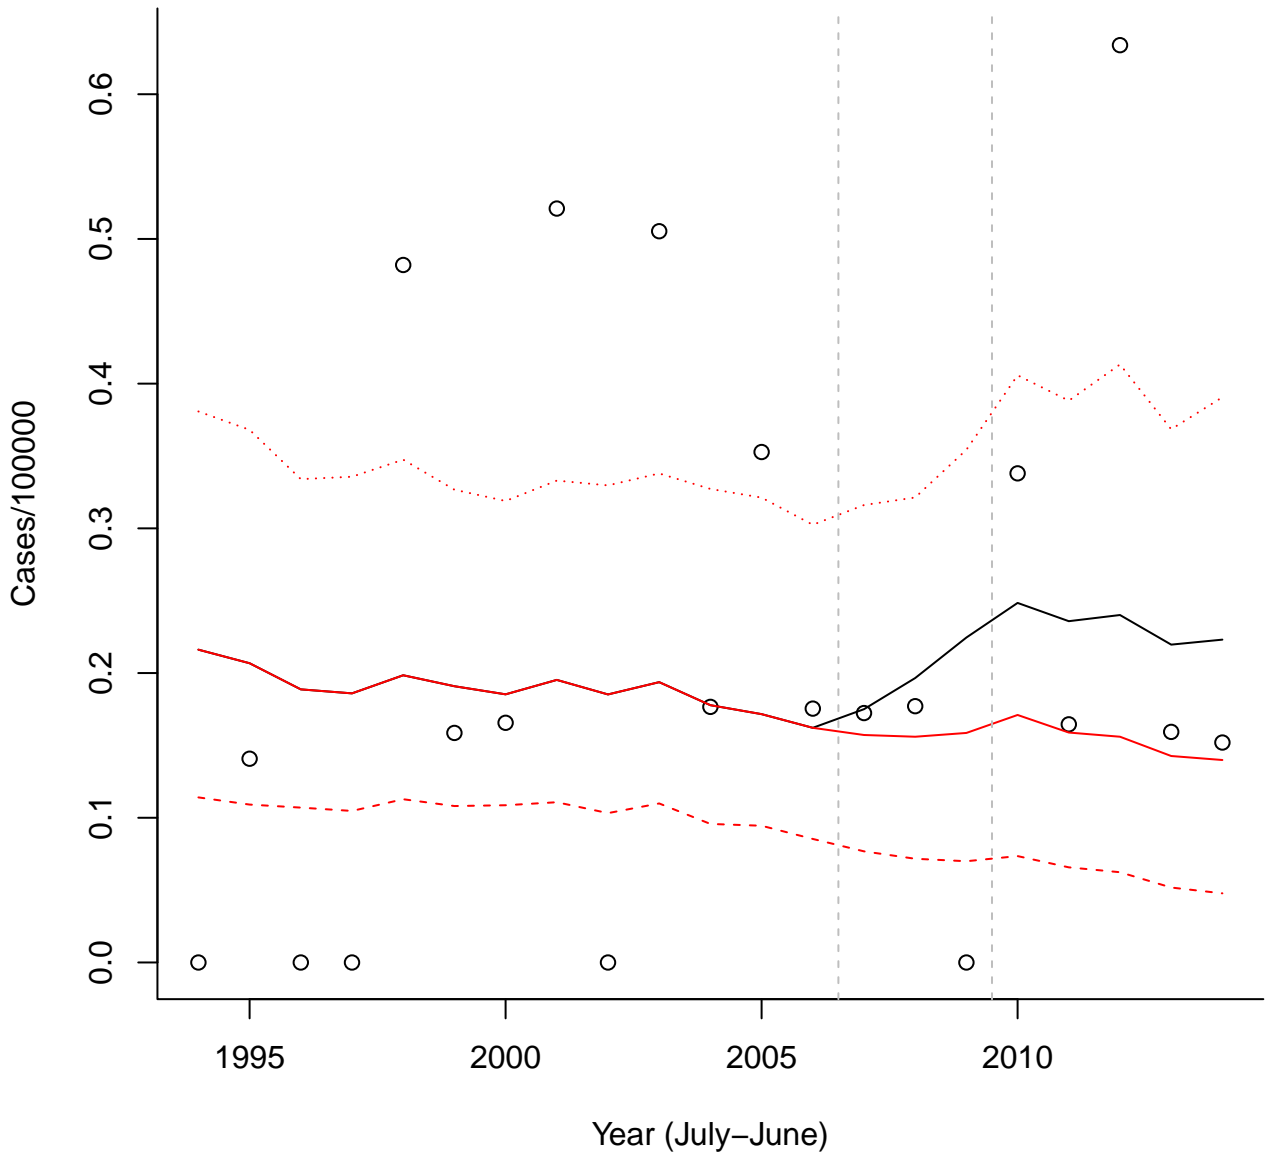



# 65+y Without comorbidity Serotype 37

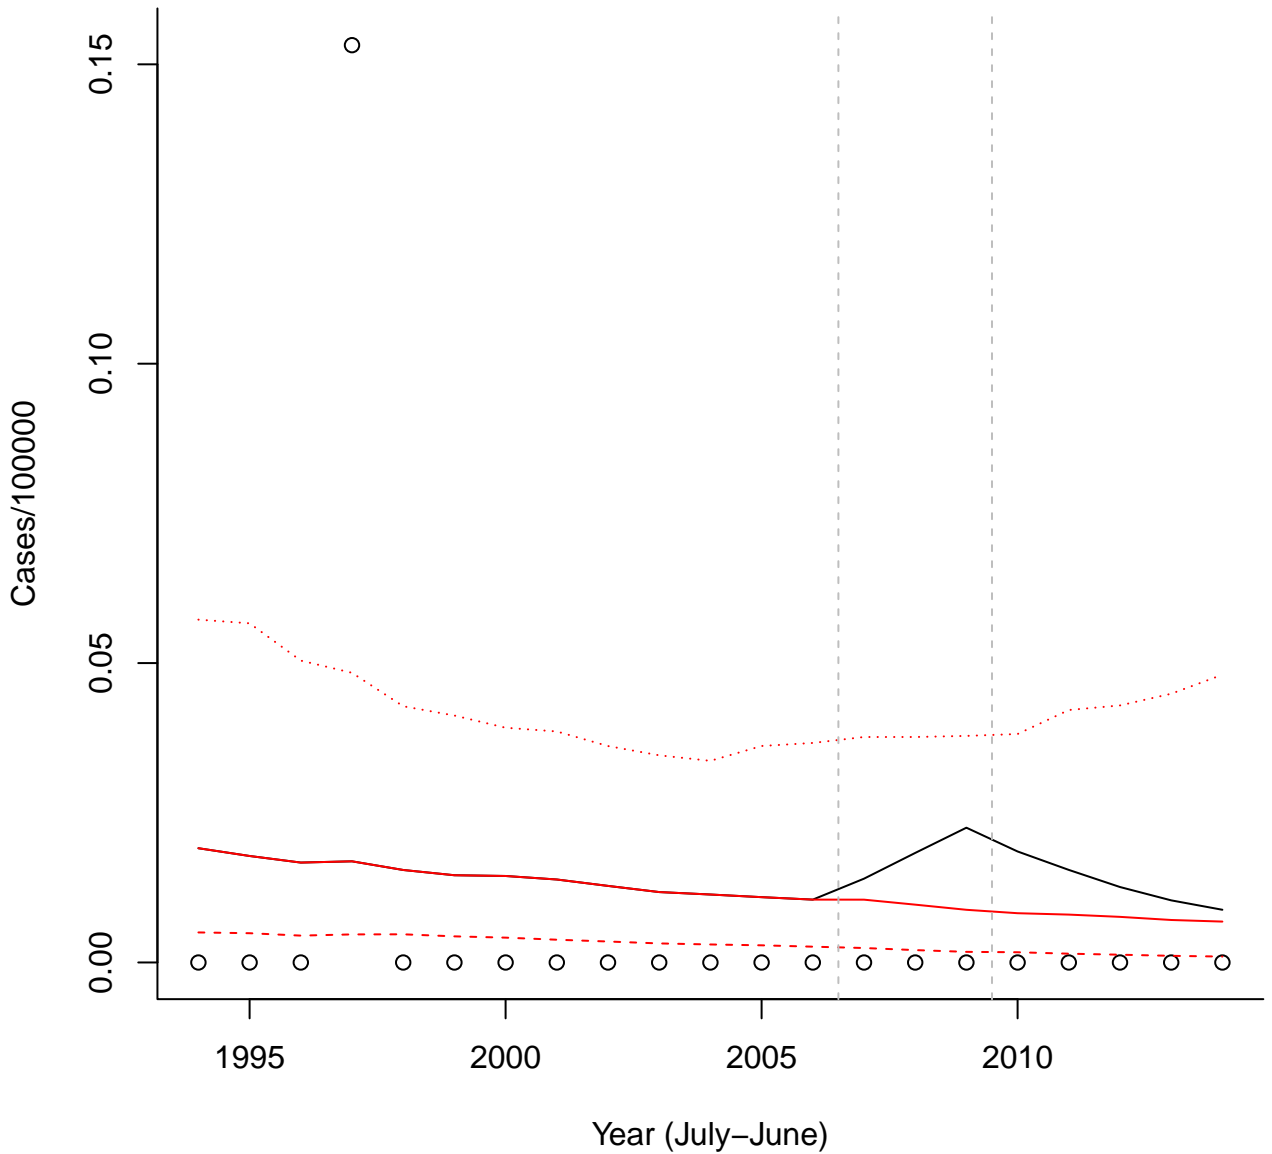

# 65+y Without comorbidity Serotype 38

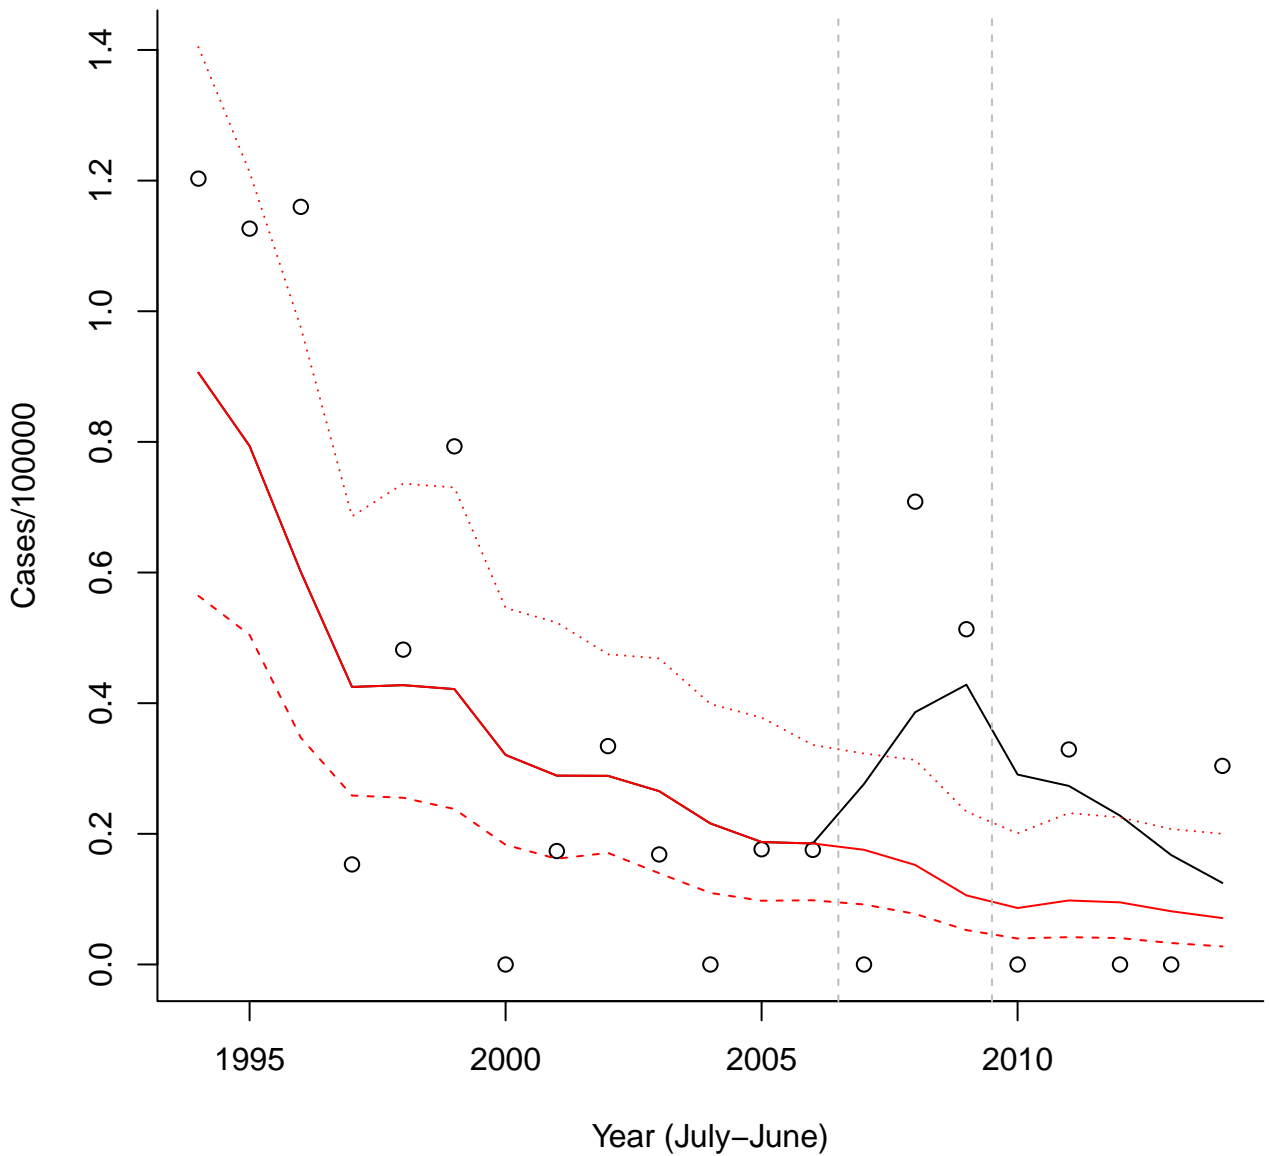

# 65+y Without comorbidity Serotype 4

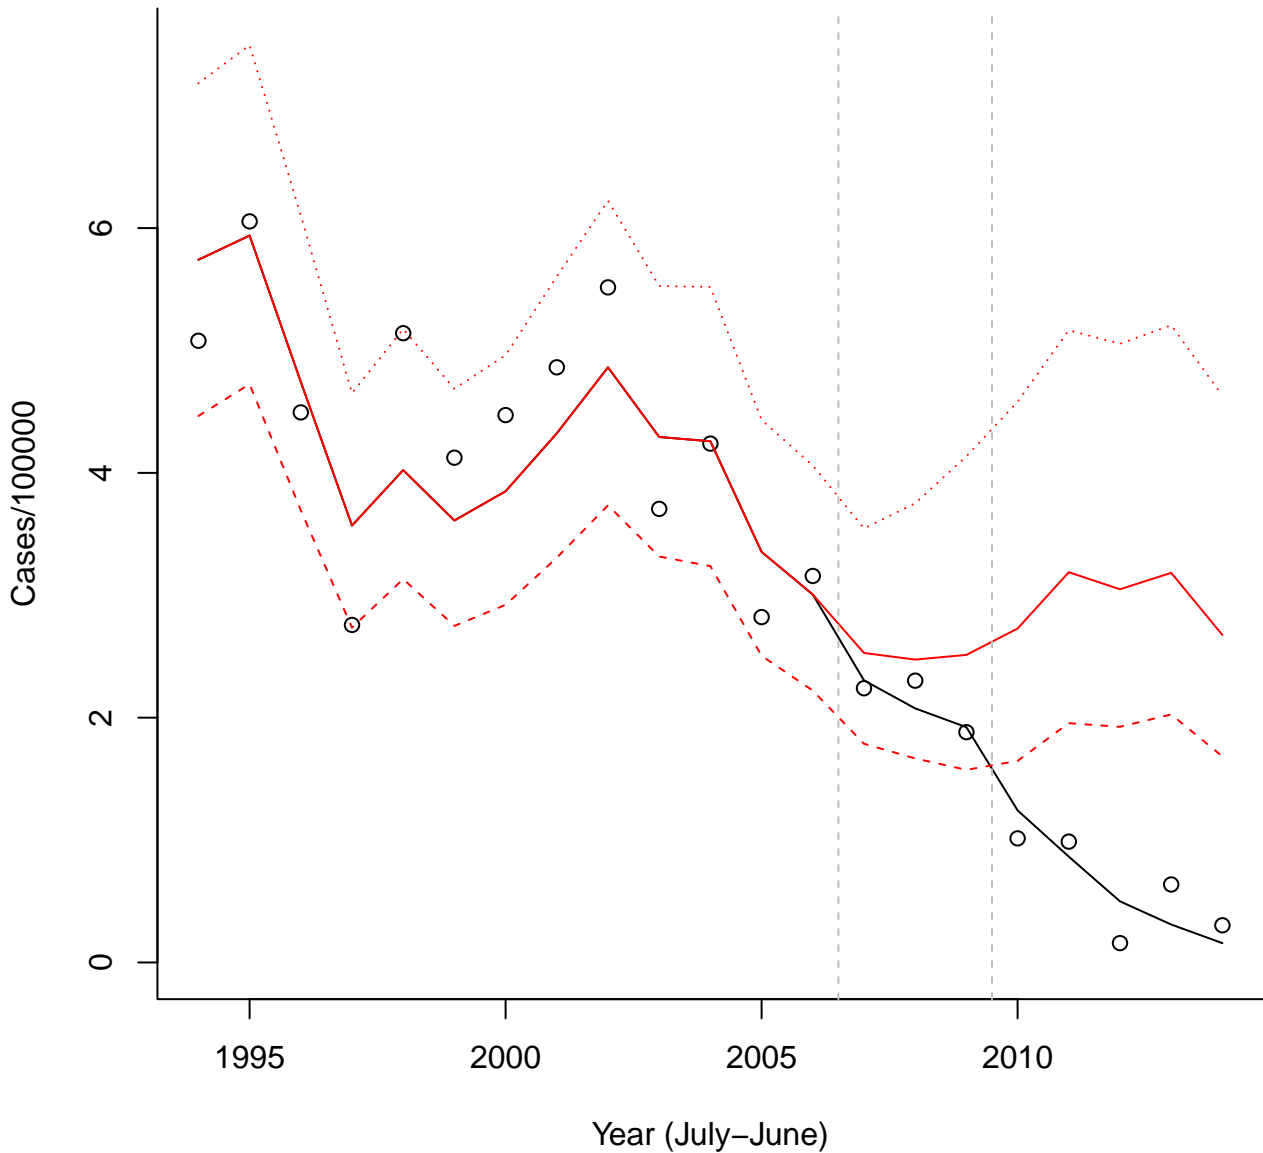

# 65+y Without comorbidity Serotype 41

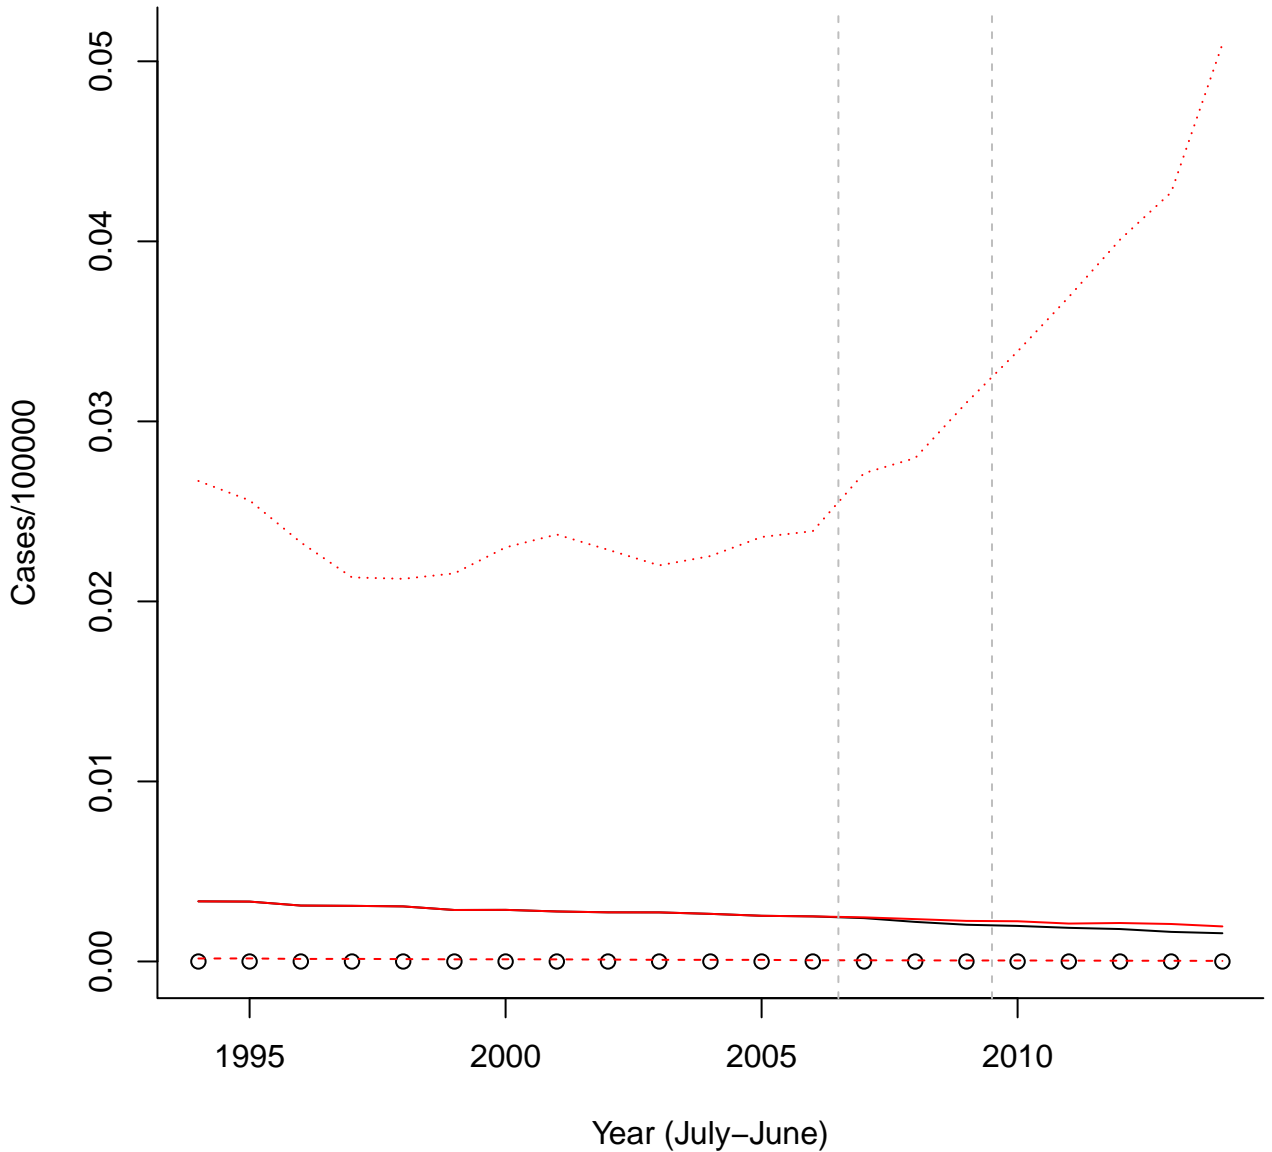

# 65+y Without comorbidity Serotype 5

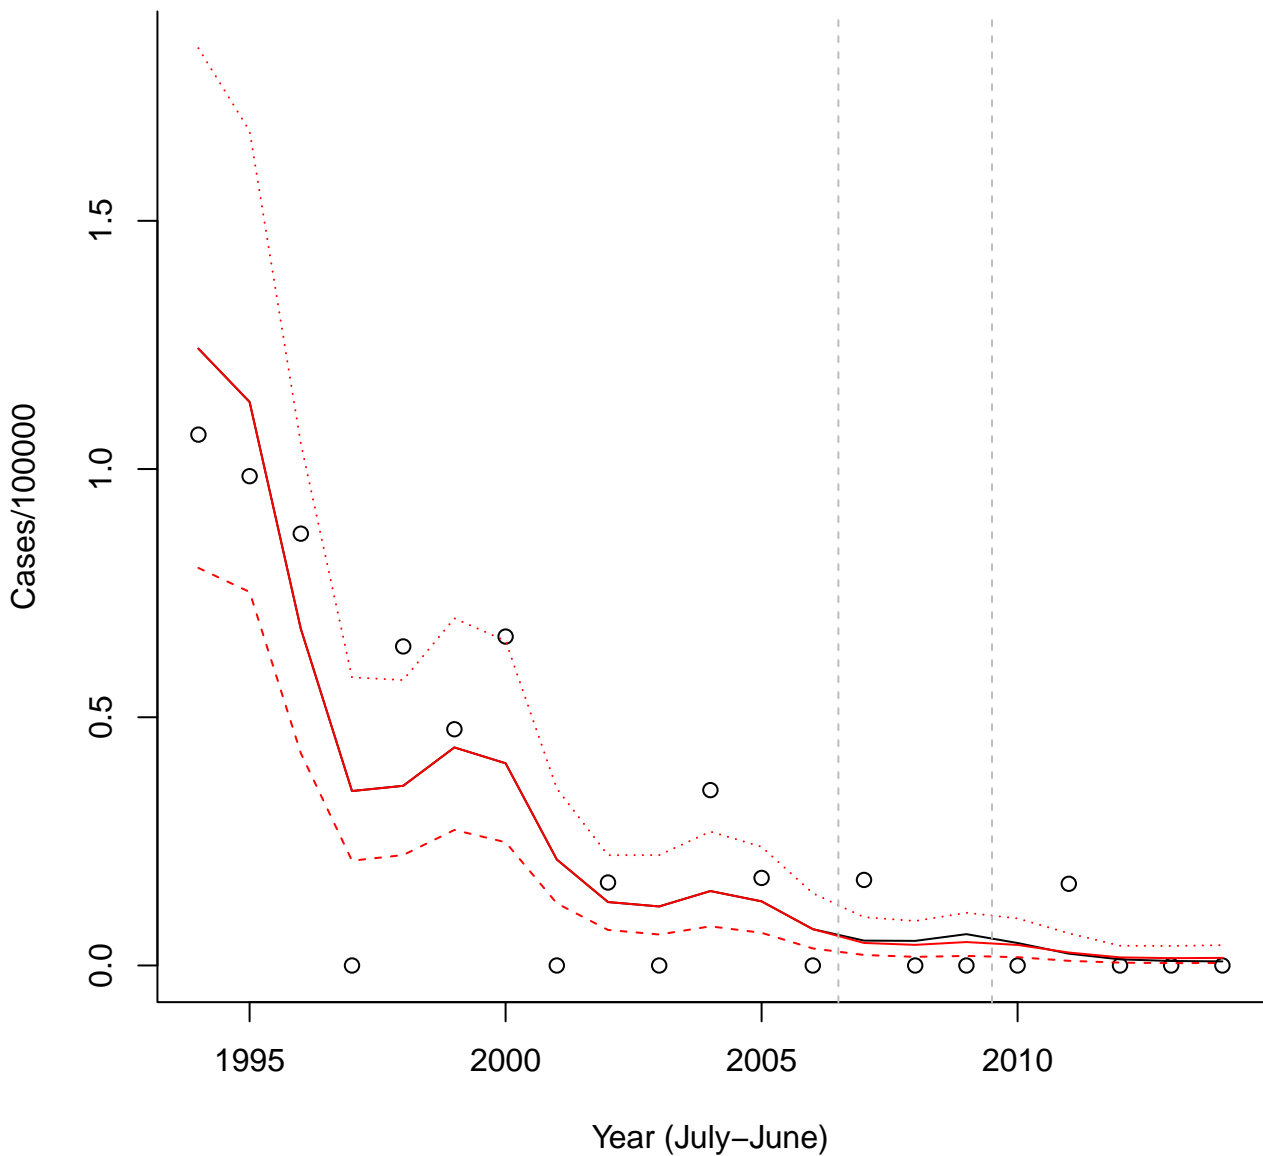

# 65+y Without comorbidity Serotype 6A

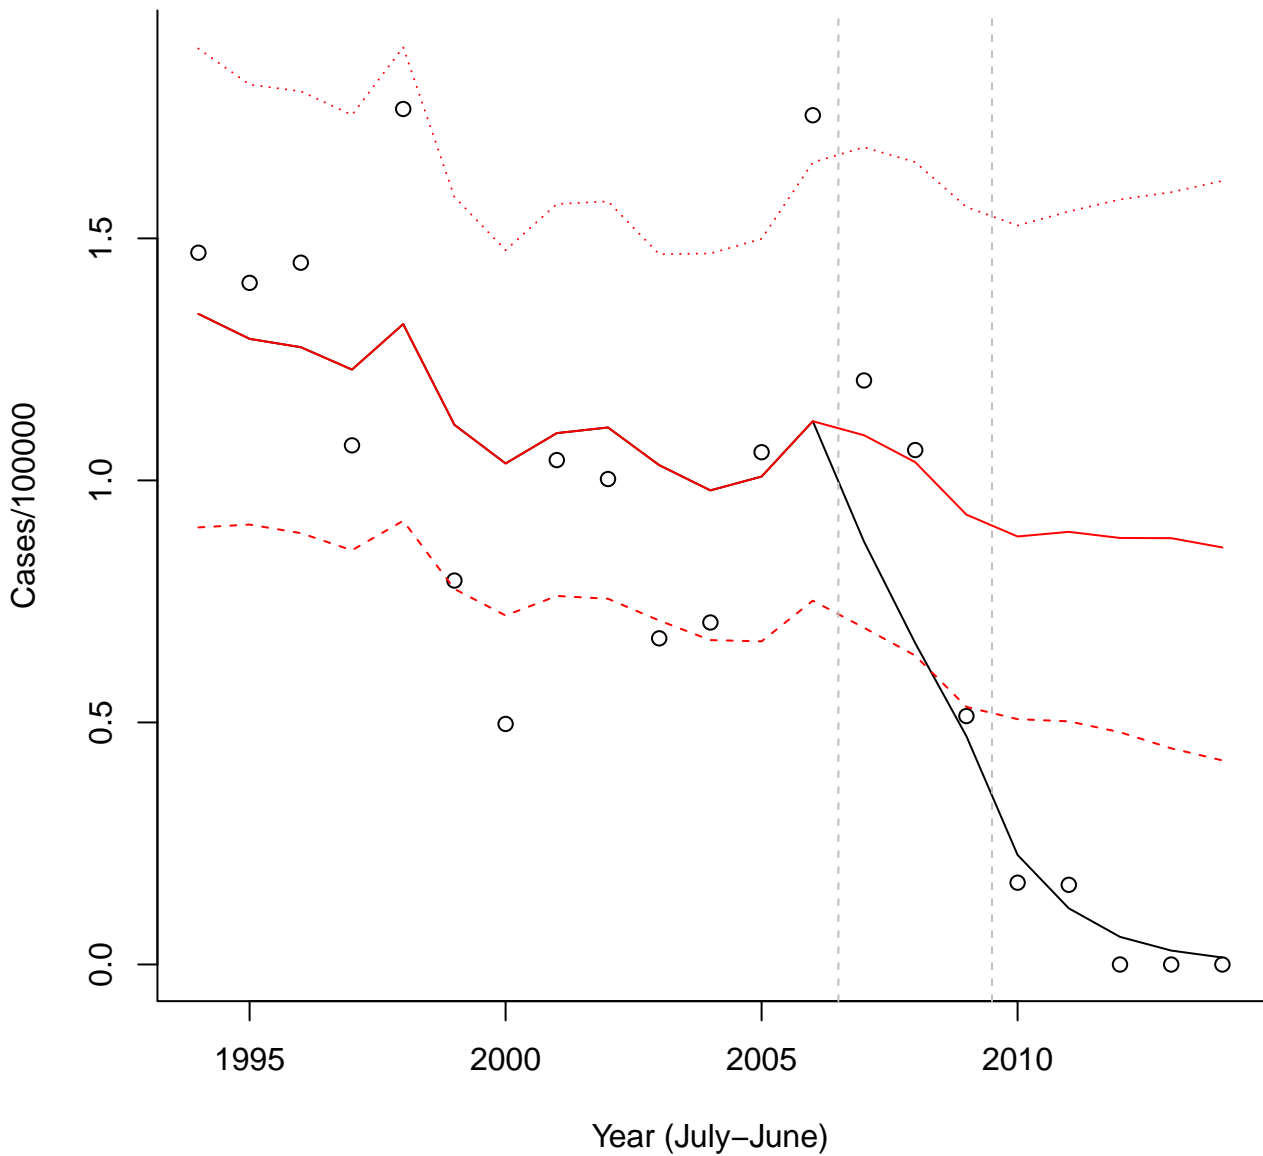

# 65+y Without comorbidity Serotype 6B

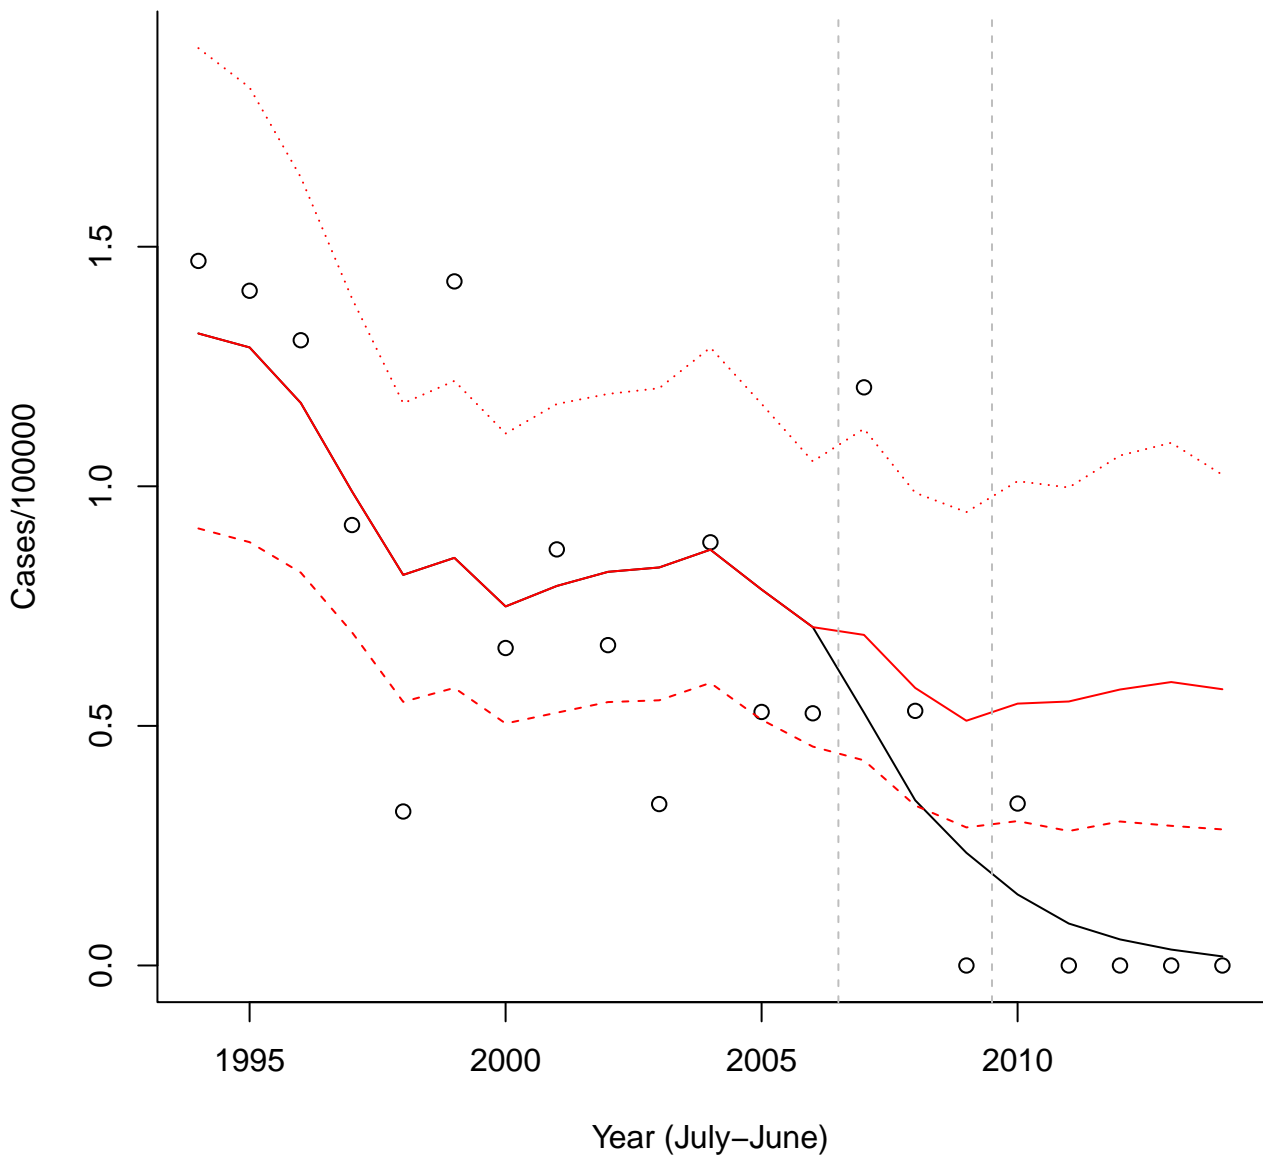

# 65+y Without comorbidity Serotype 6C

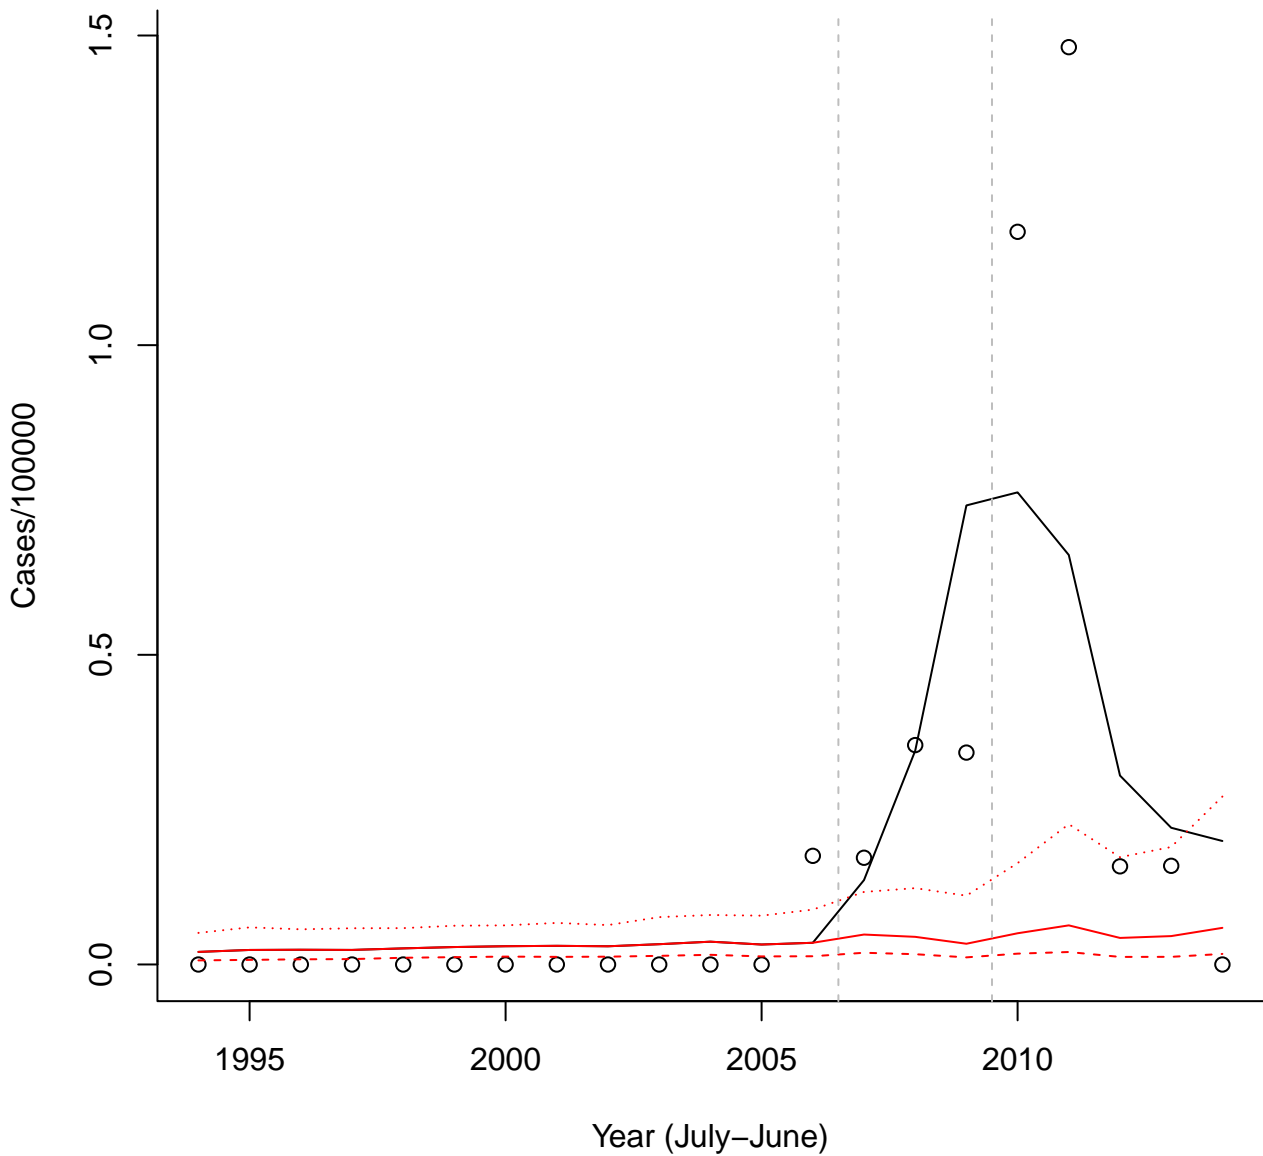



# 65+y Without comorbidity Serotype 7A

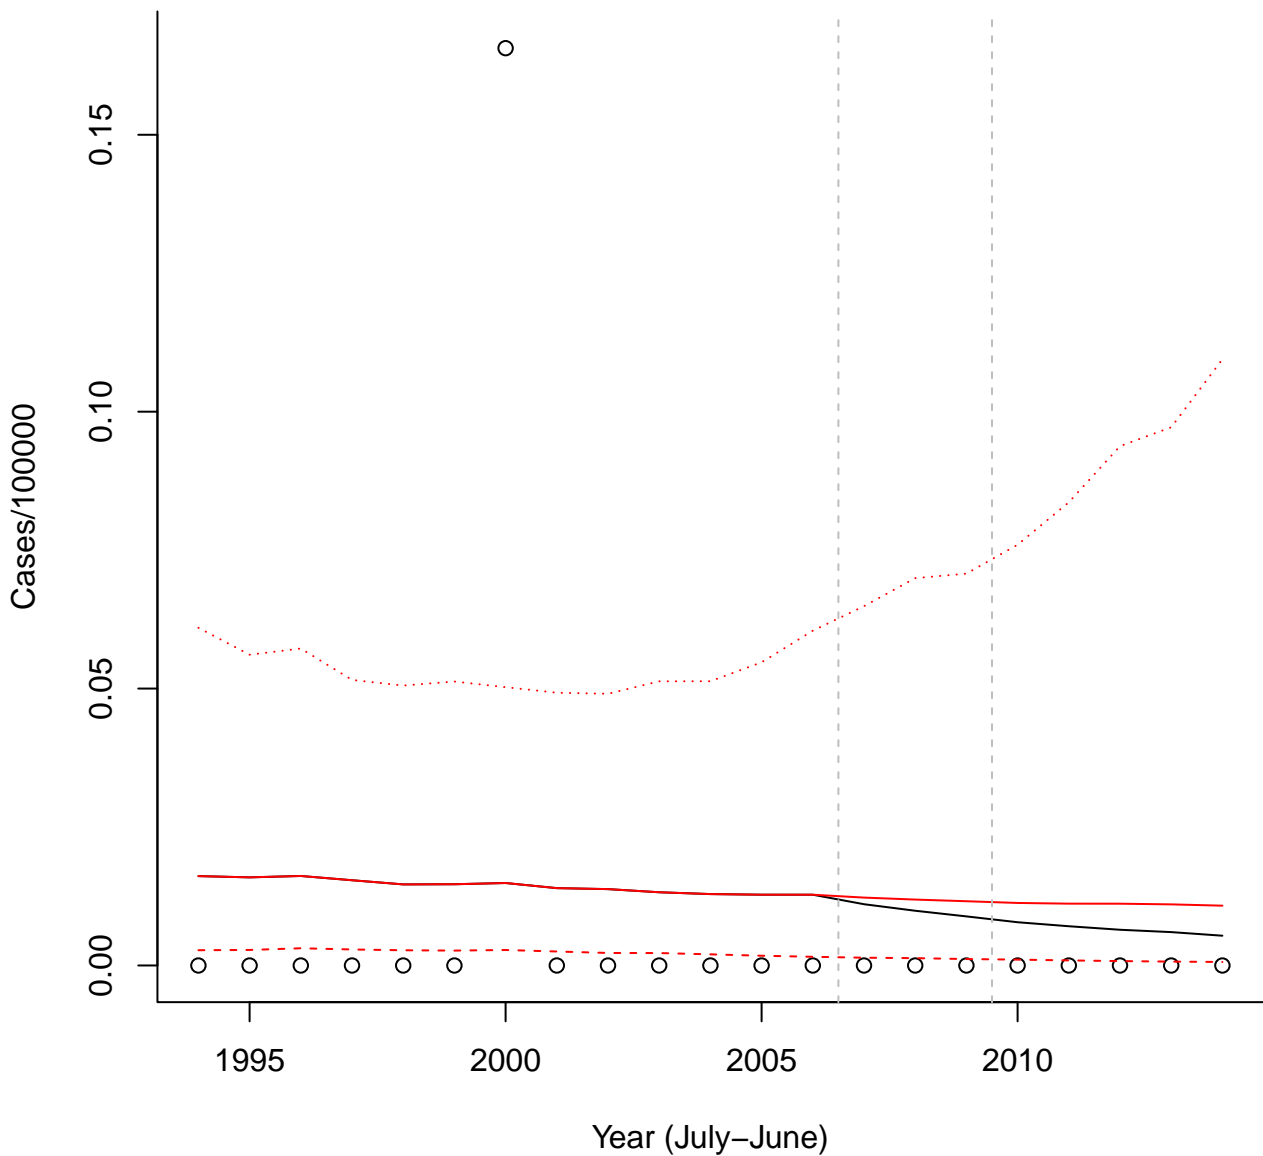

# 65+y Without comorbidity Serotype 7B

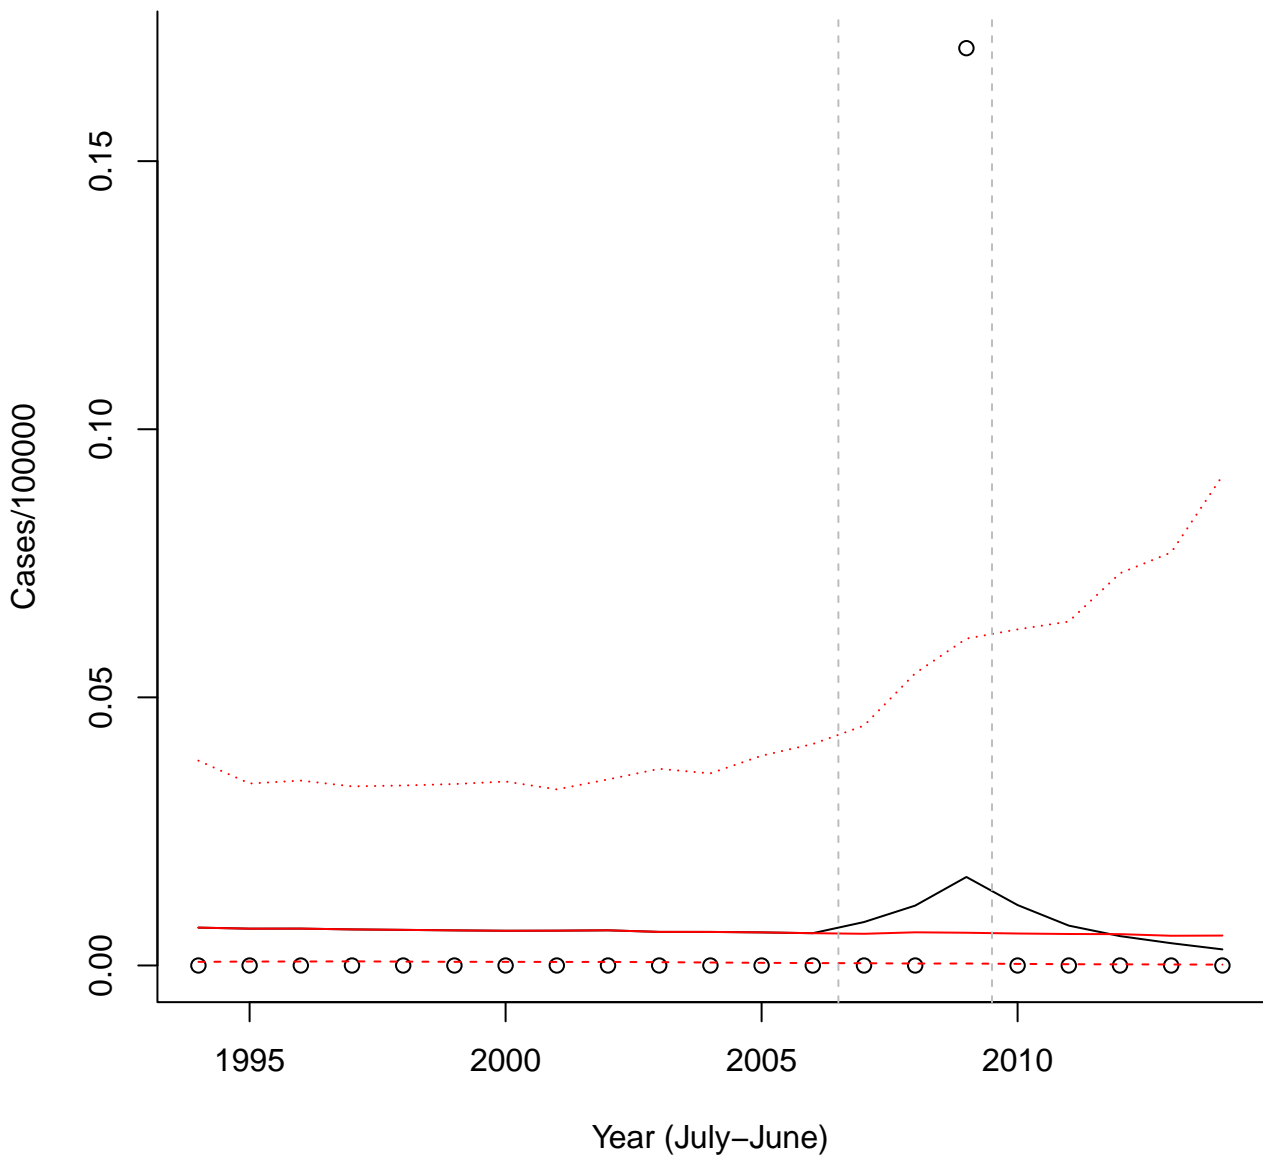

# 65+y Without comorbidity Serotype 7C

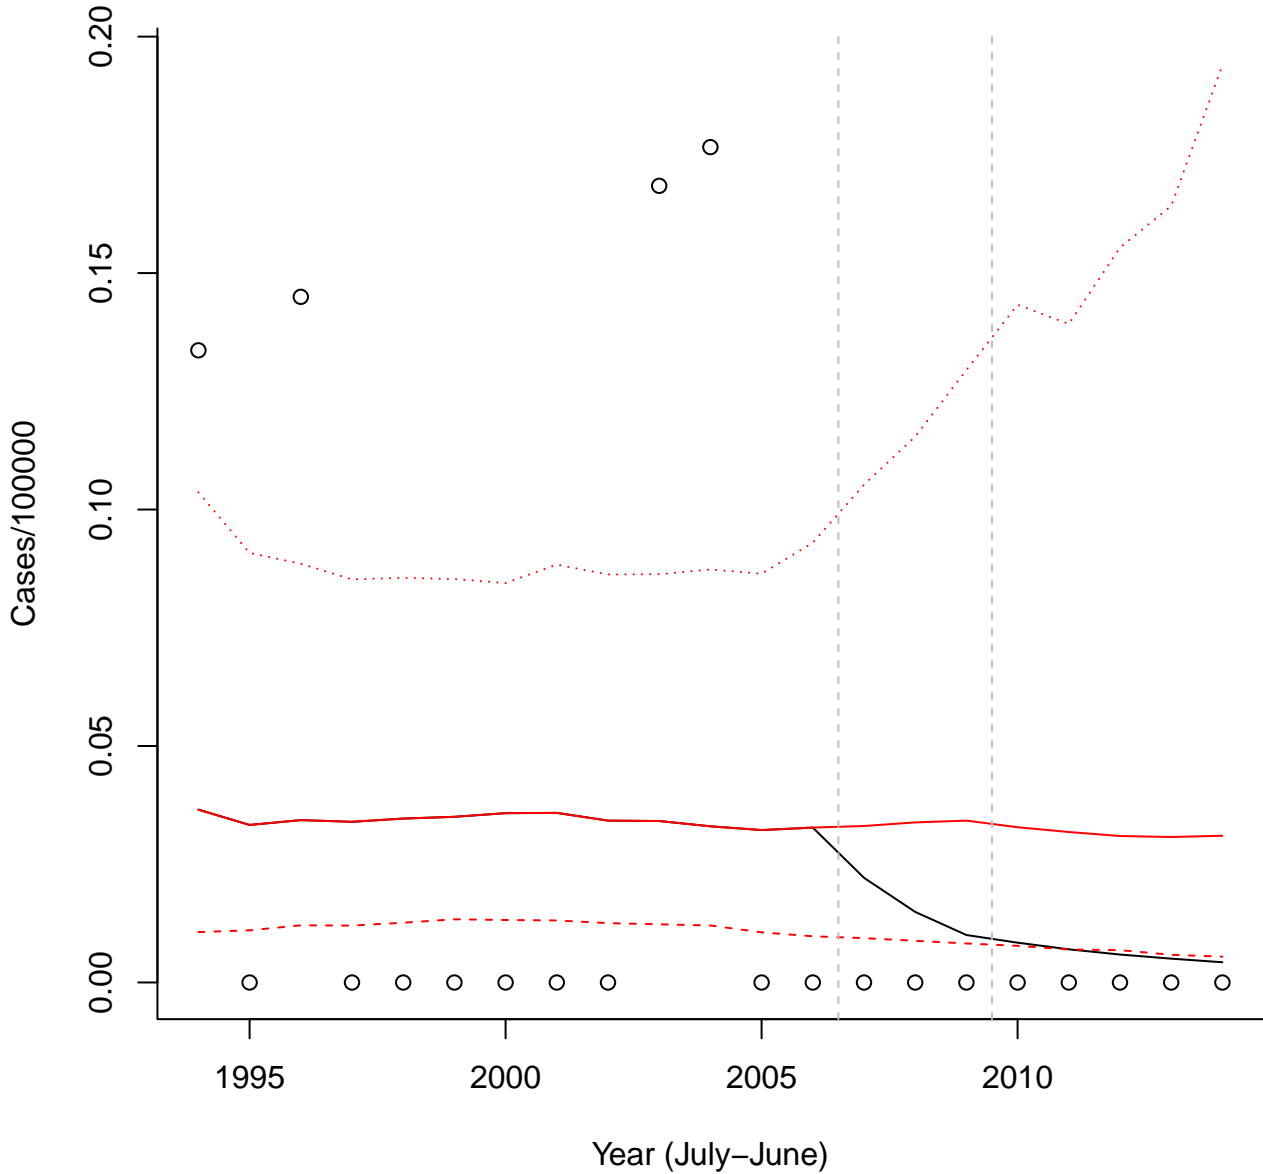

# 65+y Without comorbidity Serotype 7F

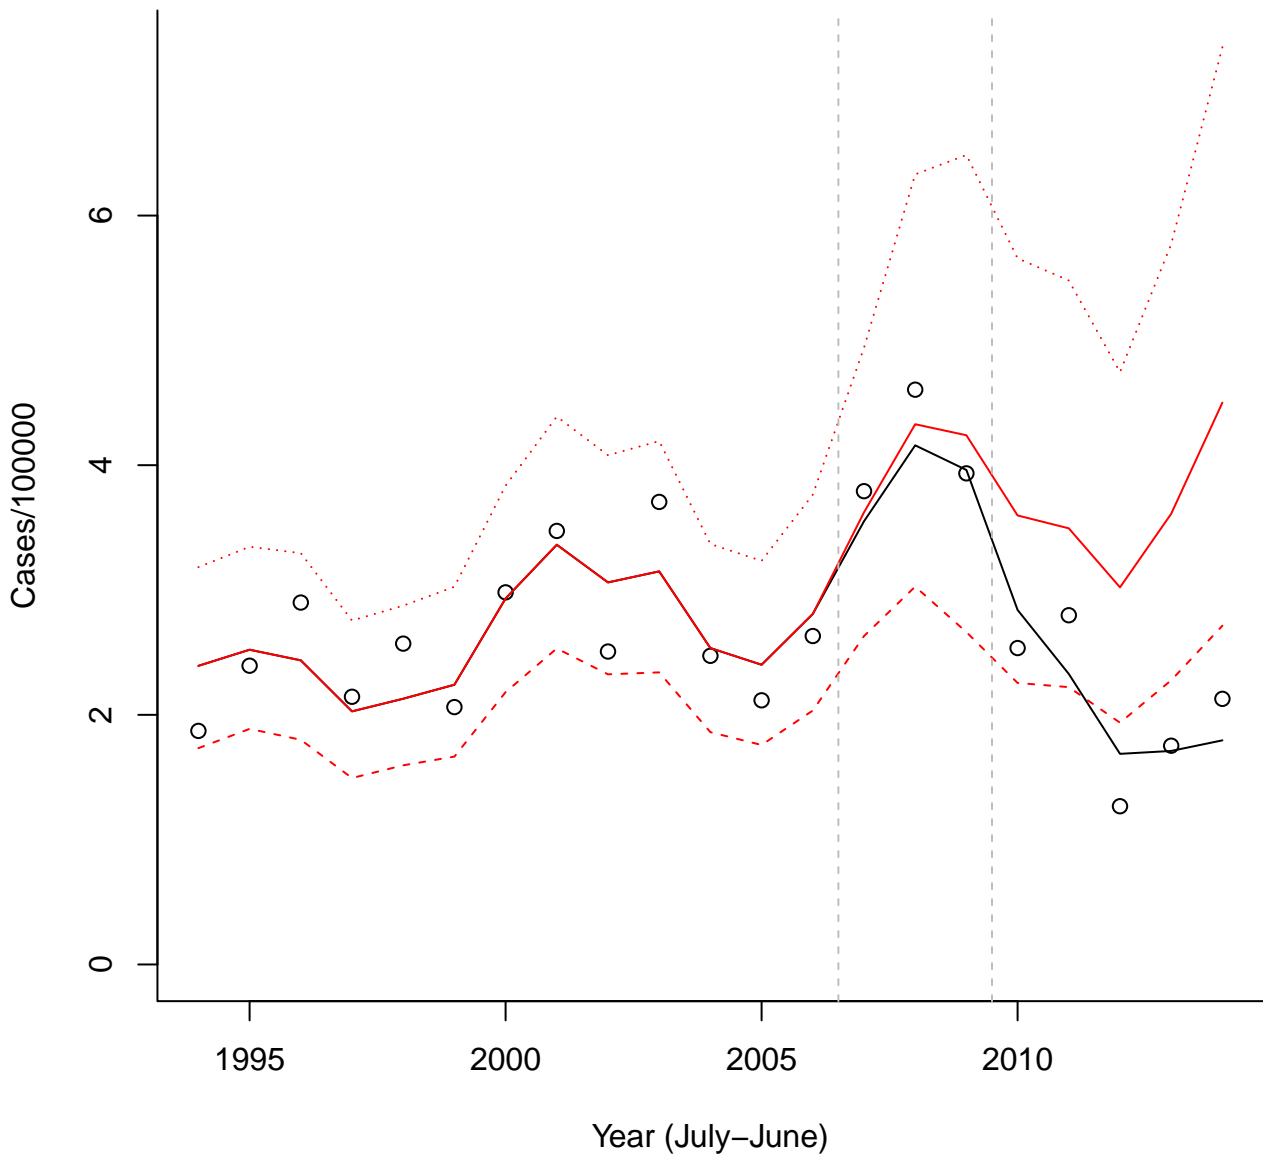

# 65+y Without comorbidity Serotype 8

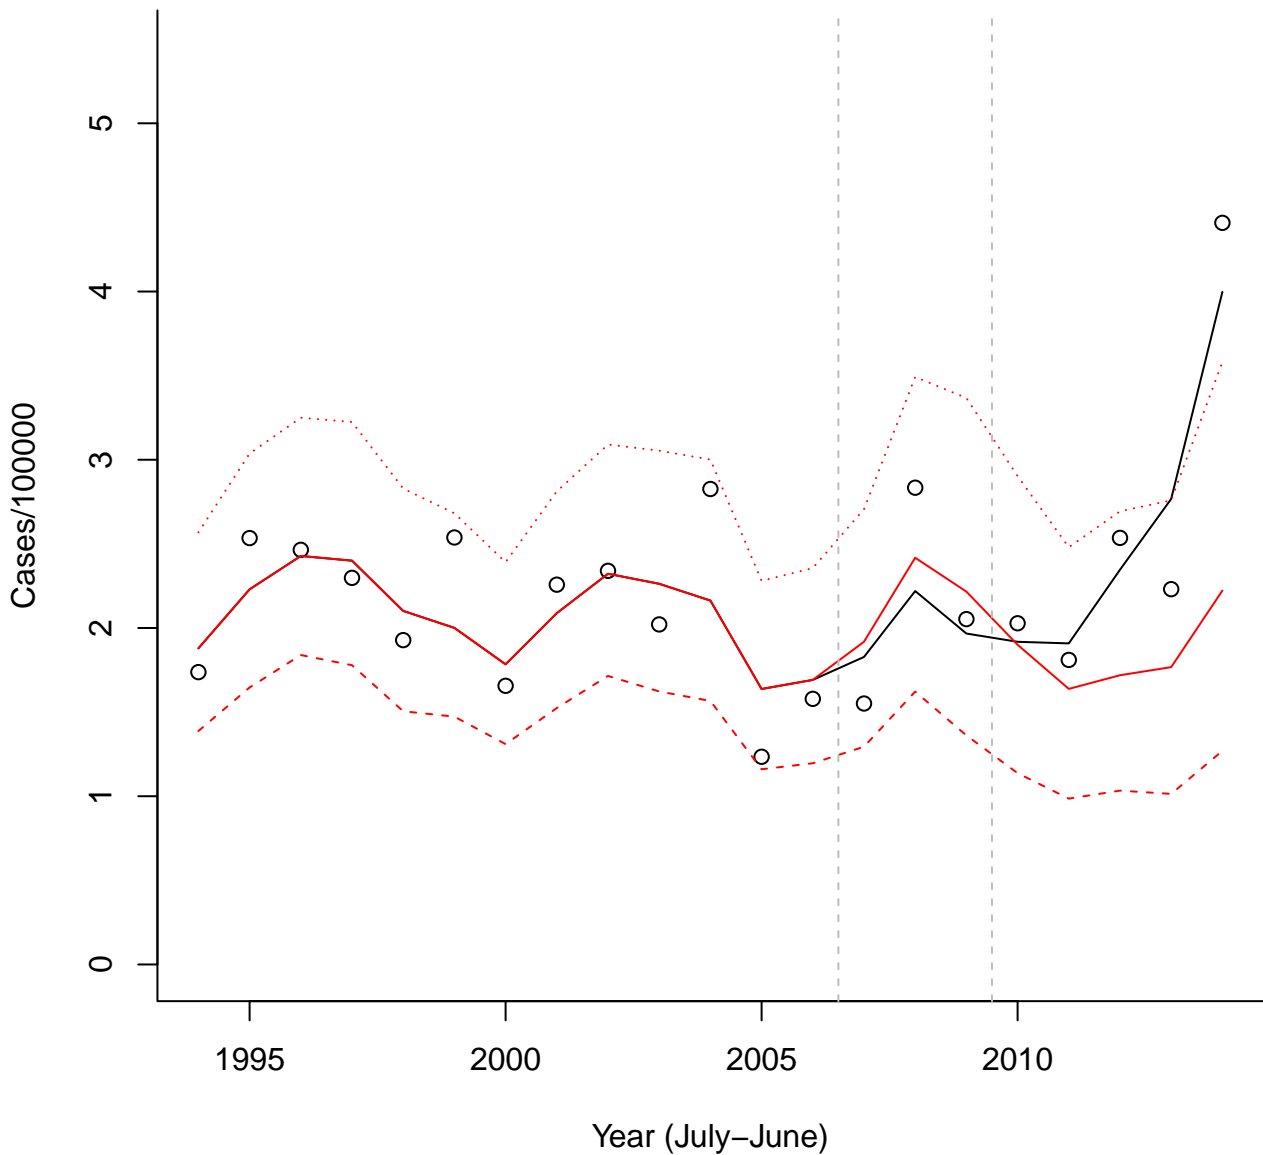

# 65+y Without comorbidity Serotype 9A

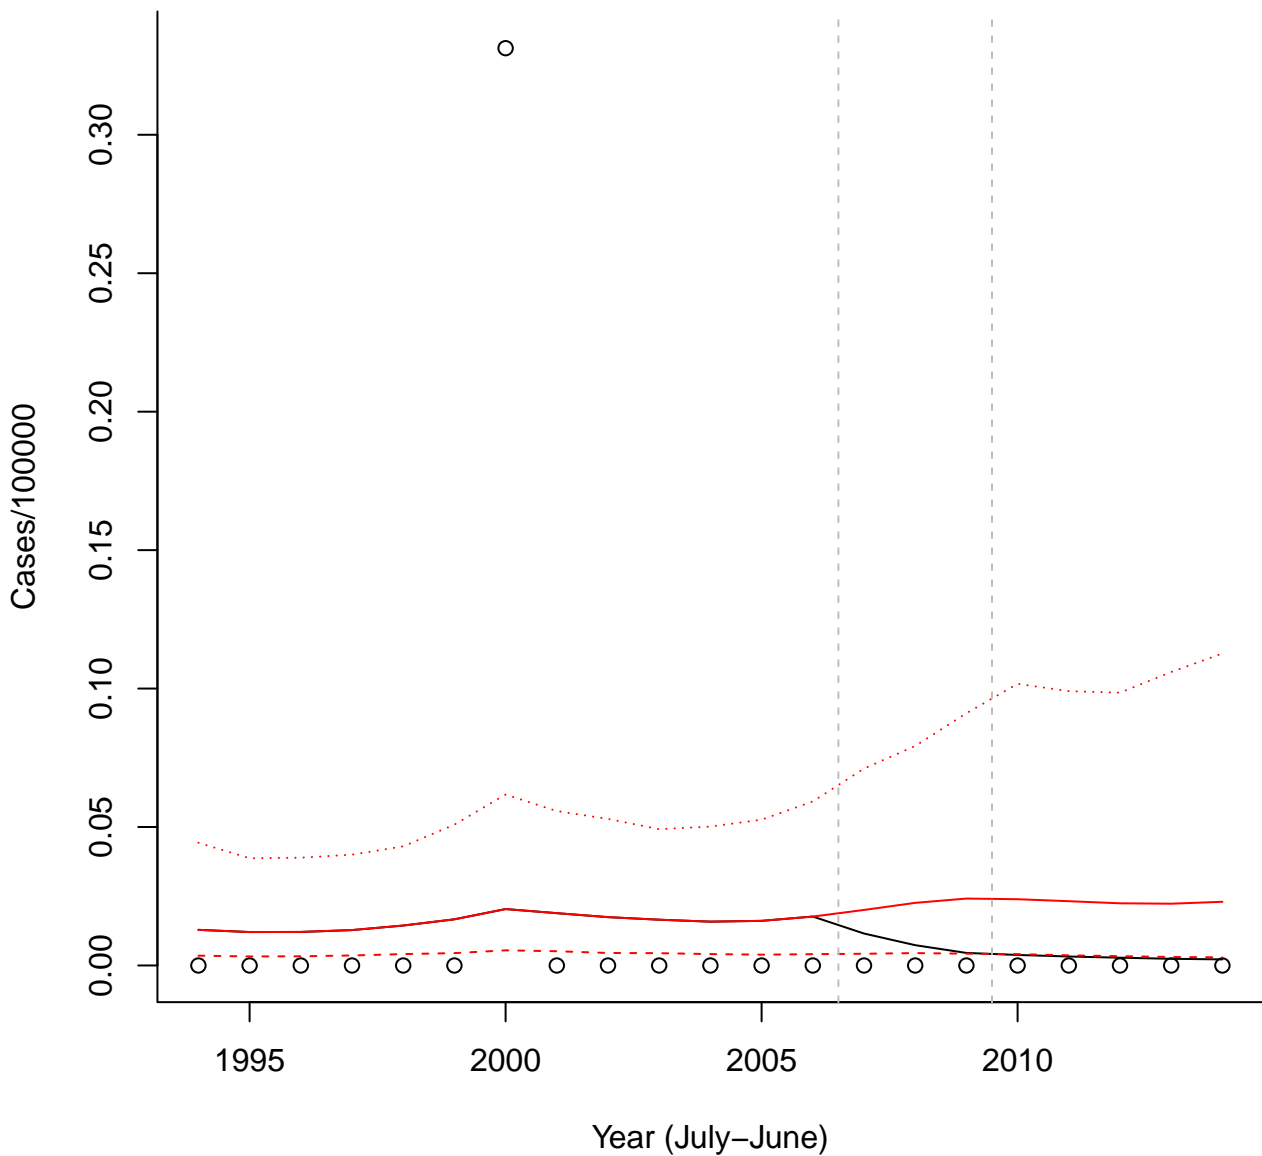

# 65+y Without comorbidity Serotype 9N

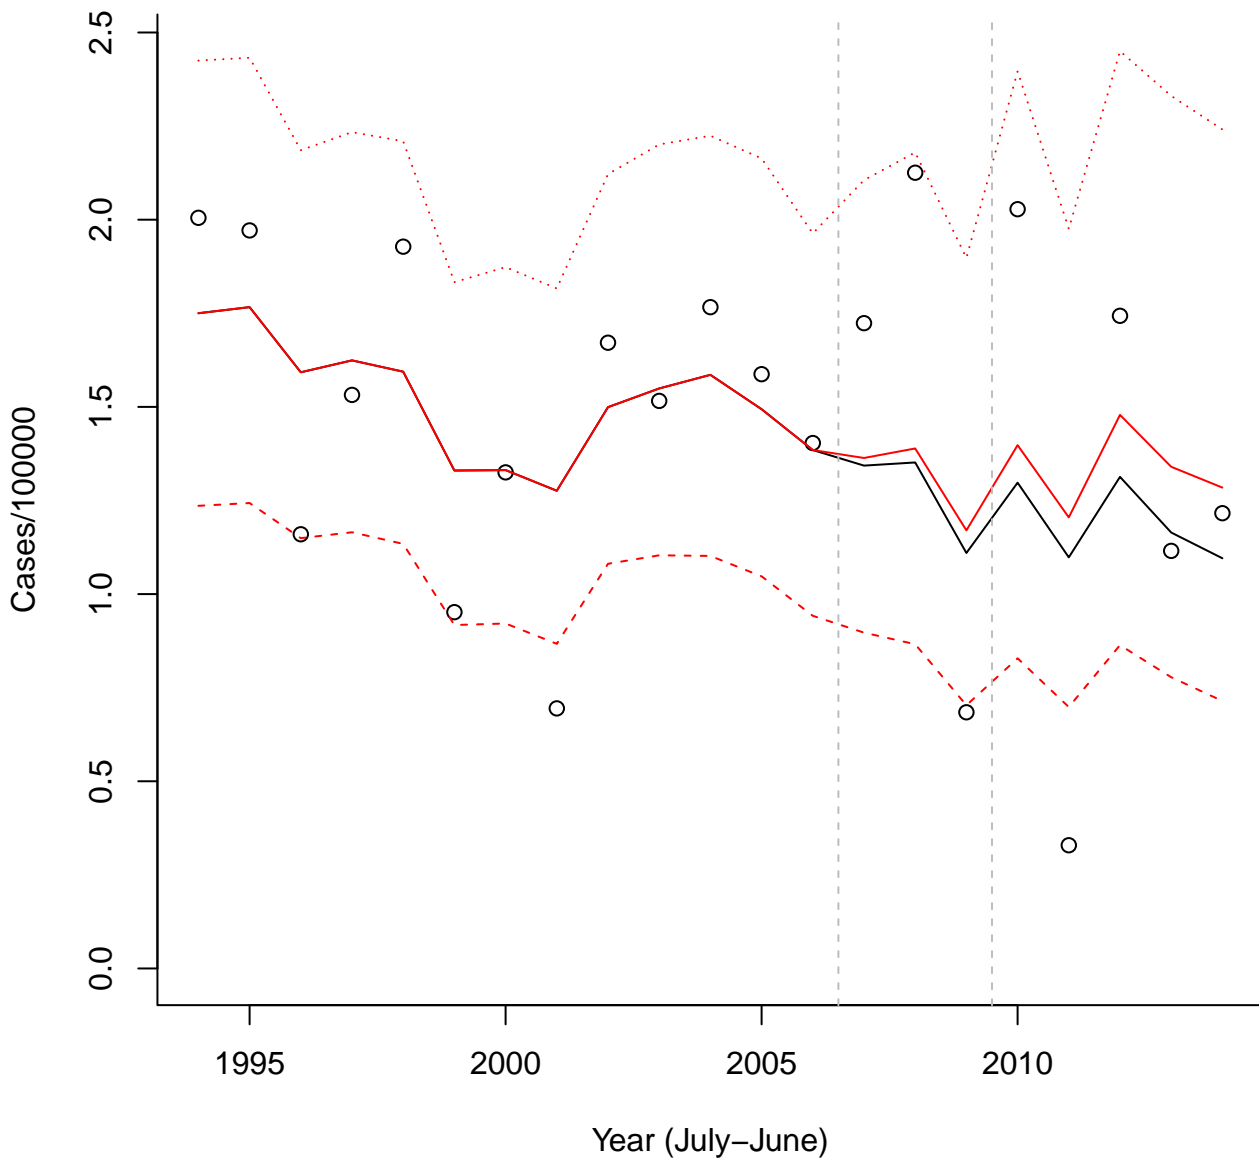

# 65+y Without comorbidity Serotype 9V

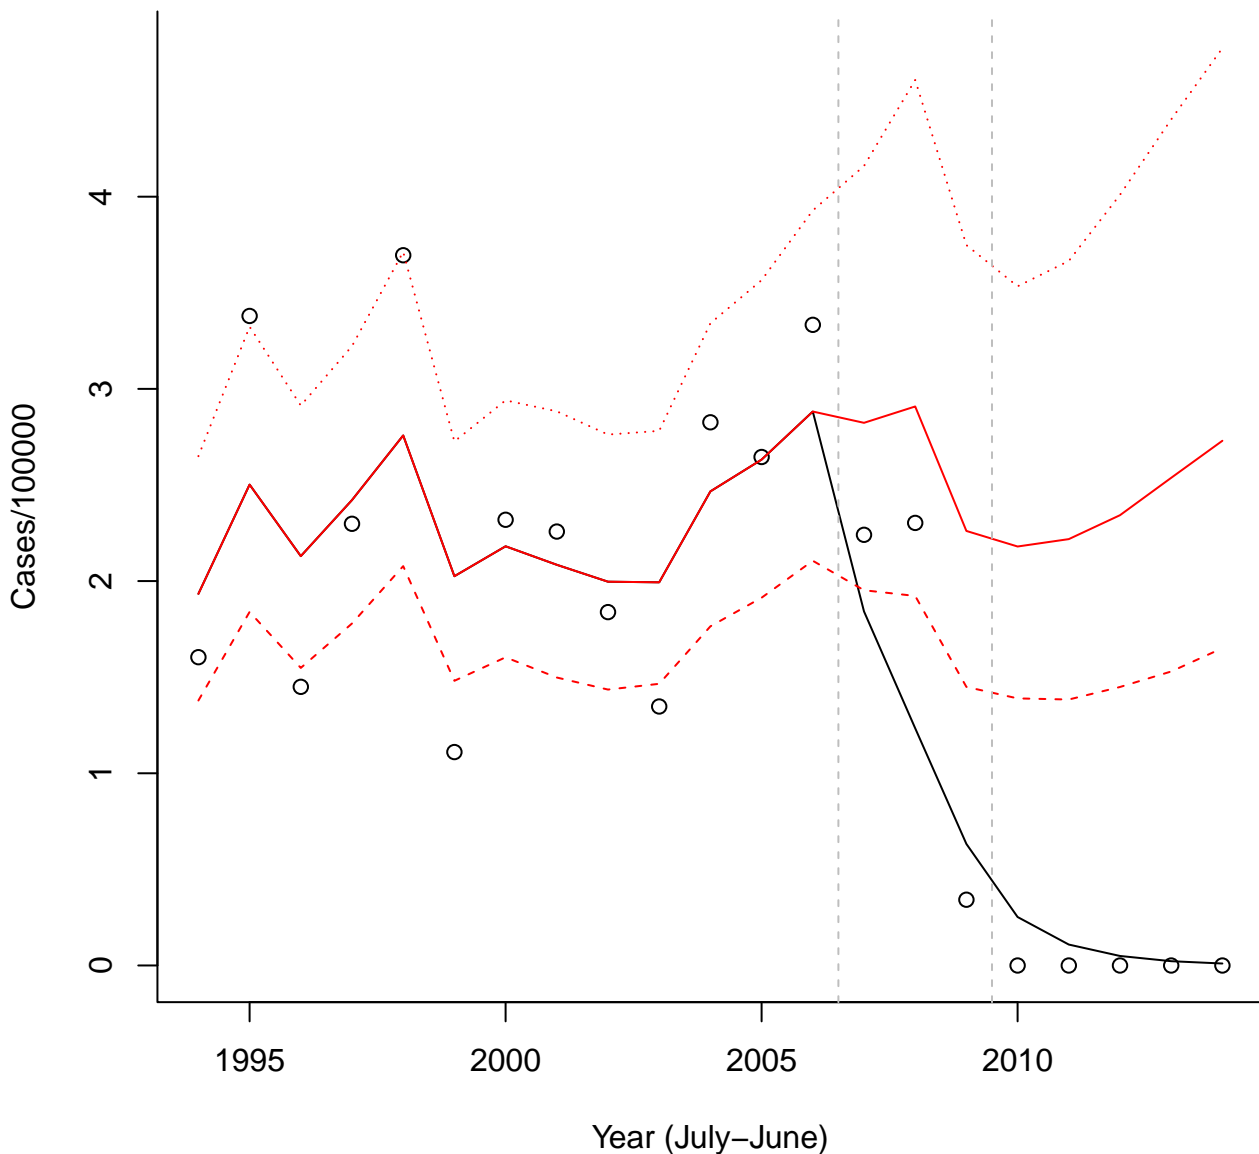



# 65+y Without comorbidity Serotype OT0

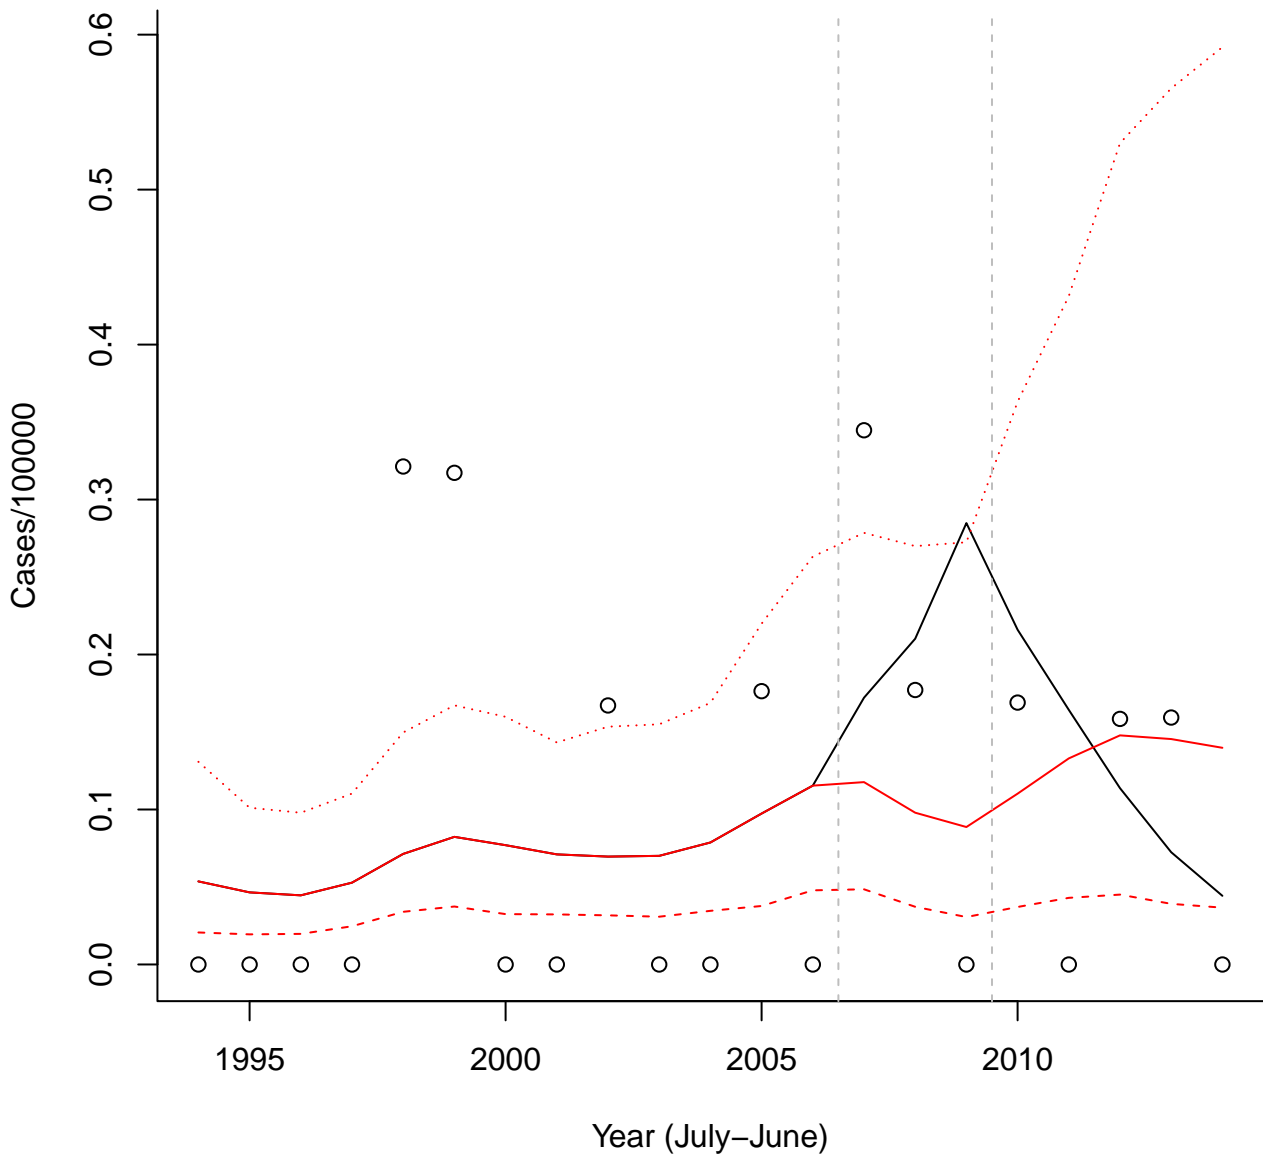

# <5y With comorbidity Serotype 1

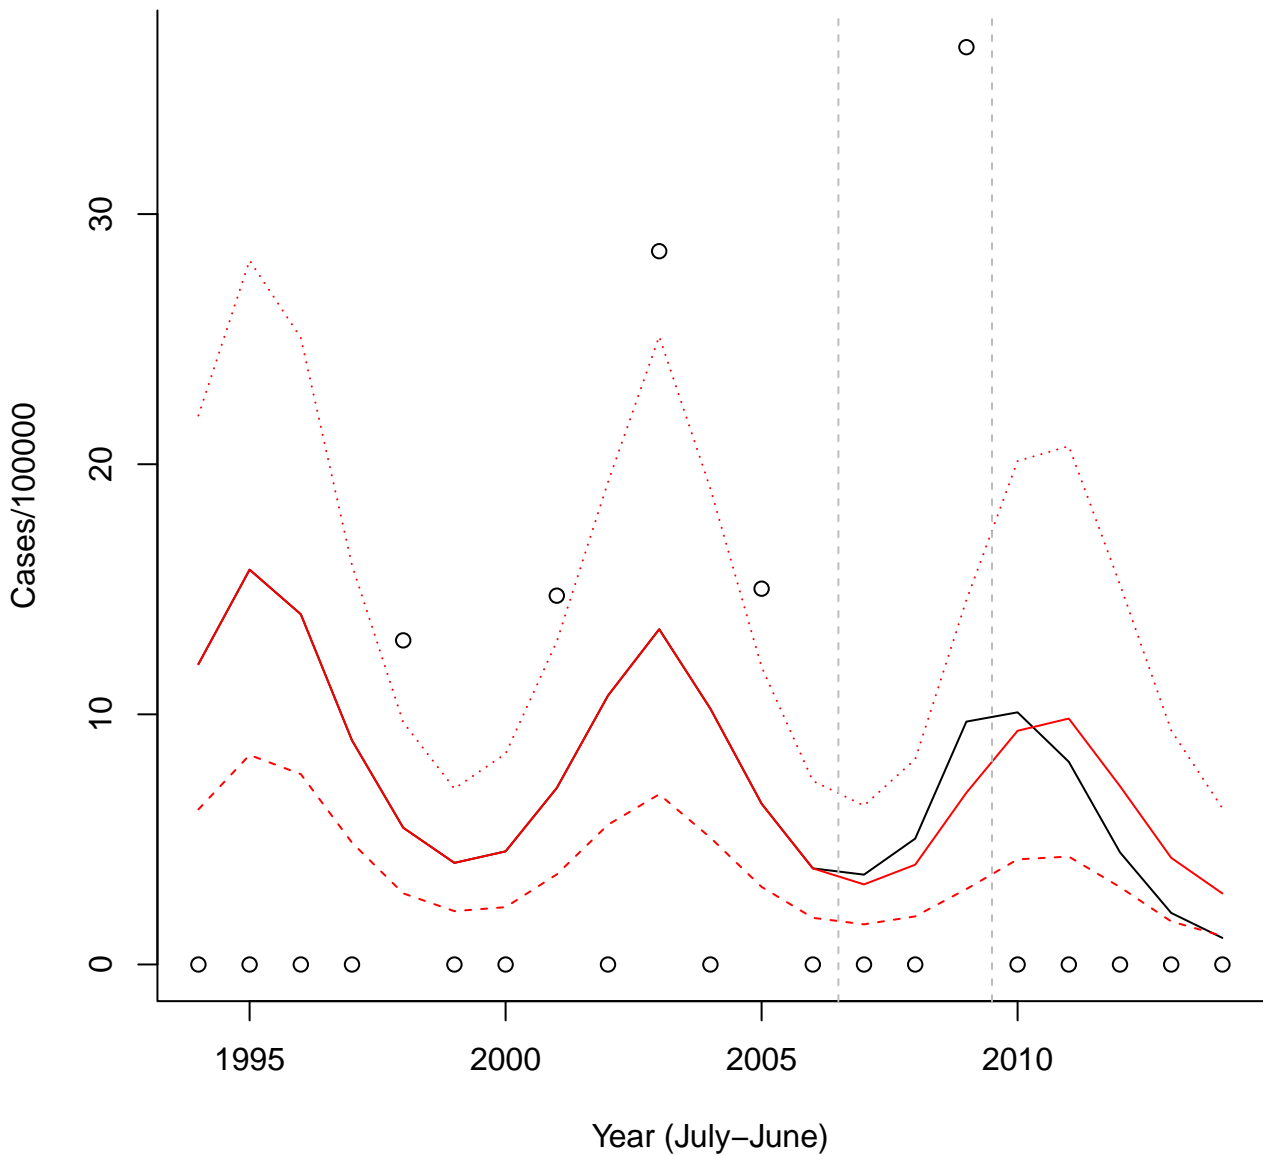

# <5y With comorbidity Serotype 10A

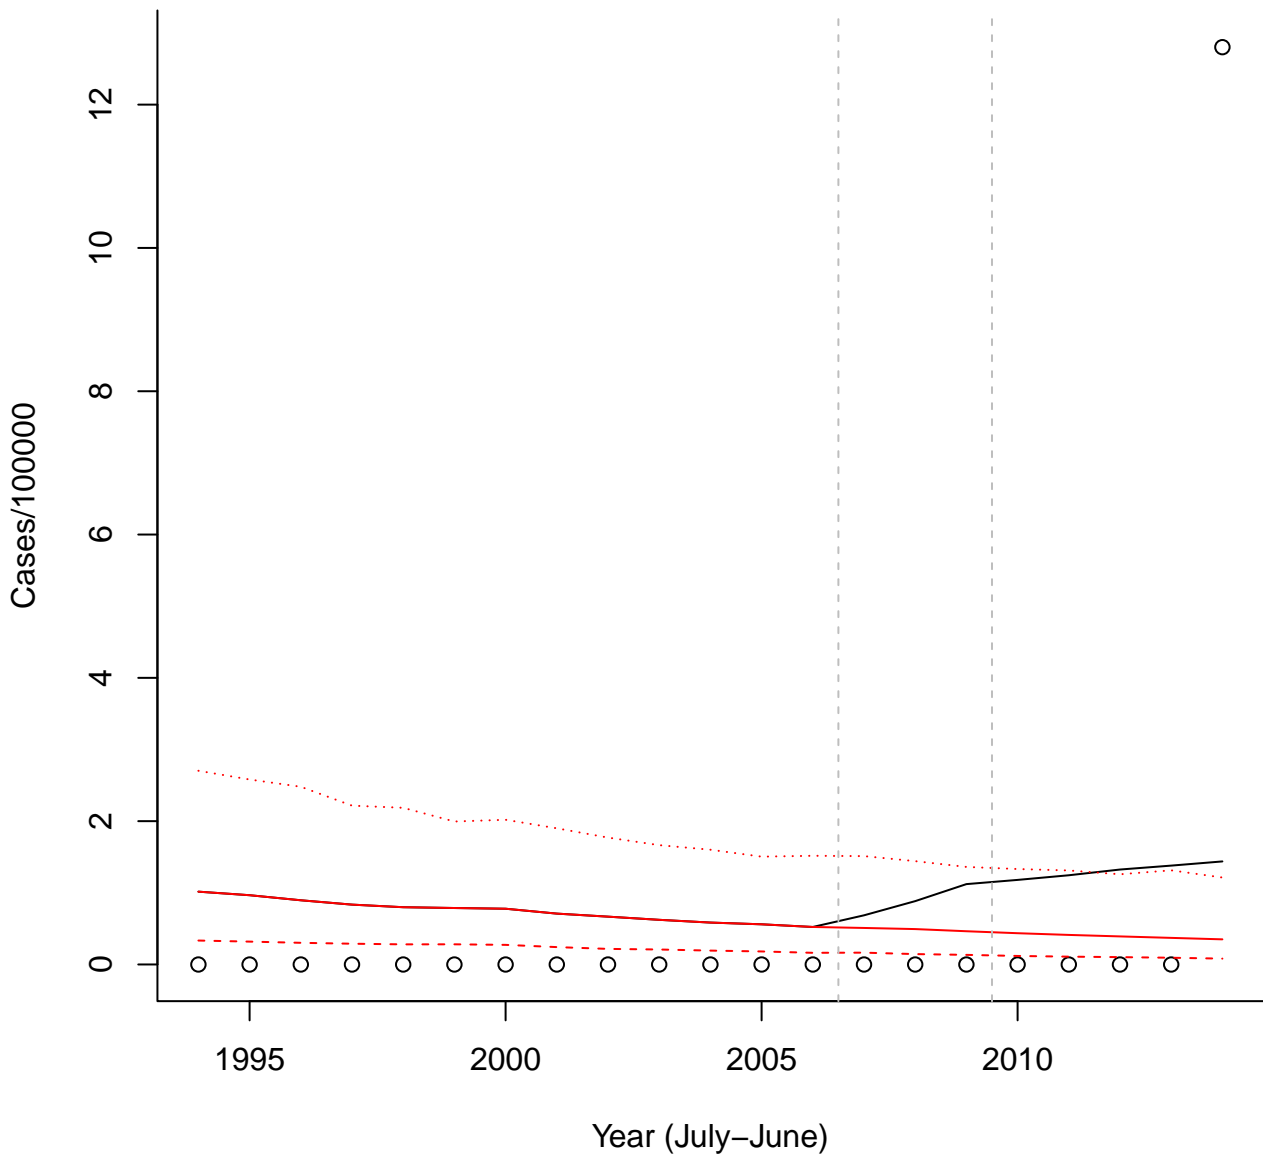

# <5y With comorbidity Serotype 10B

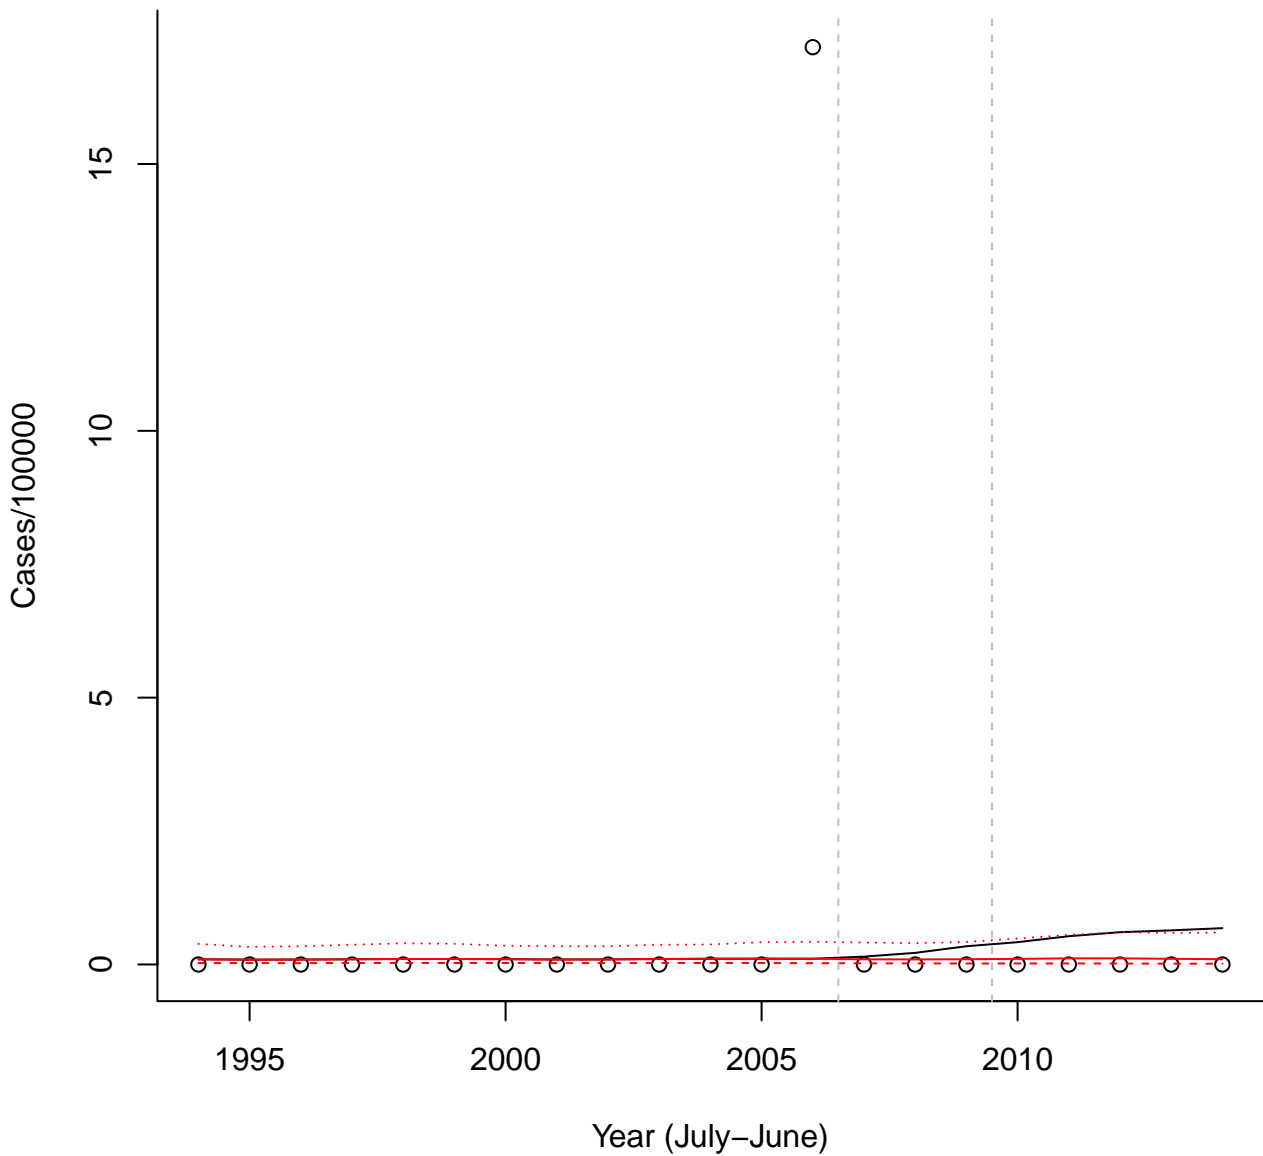

# <5y With comorbidity Serotype 11A

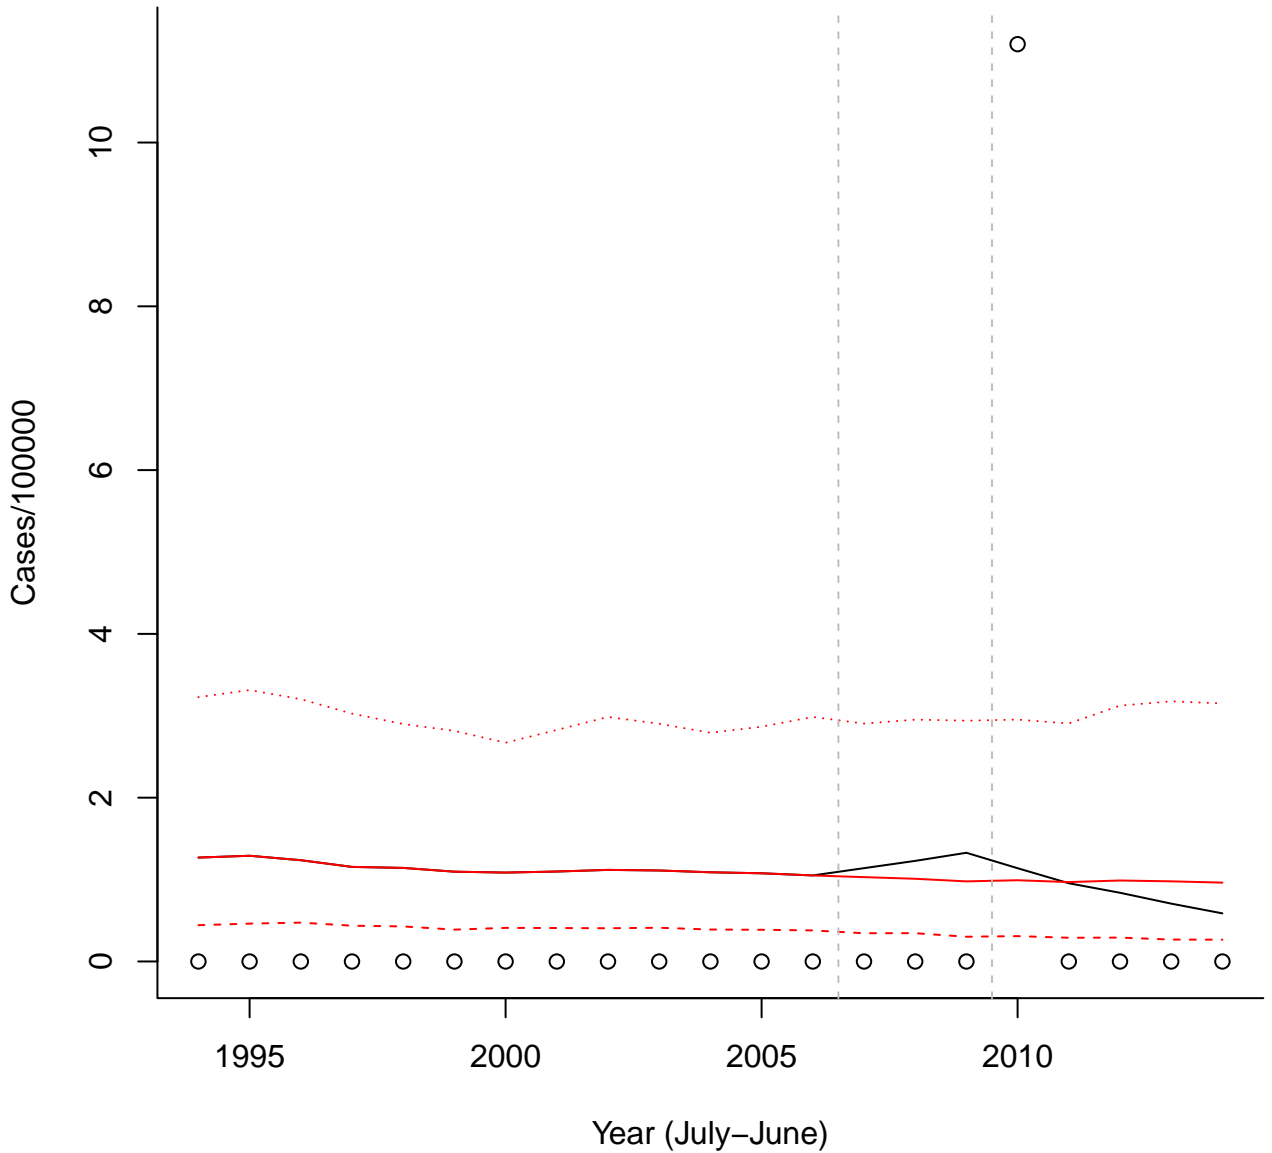

# <5y With comorbidity Serotype 12F

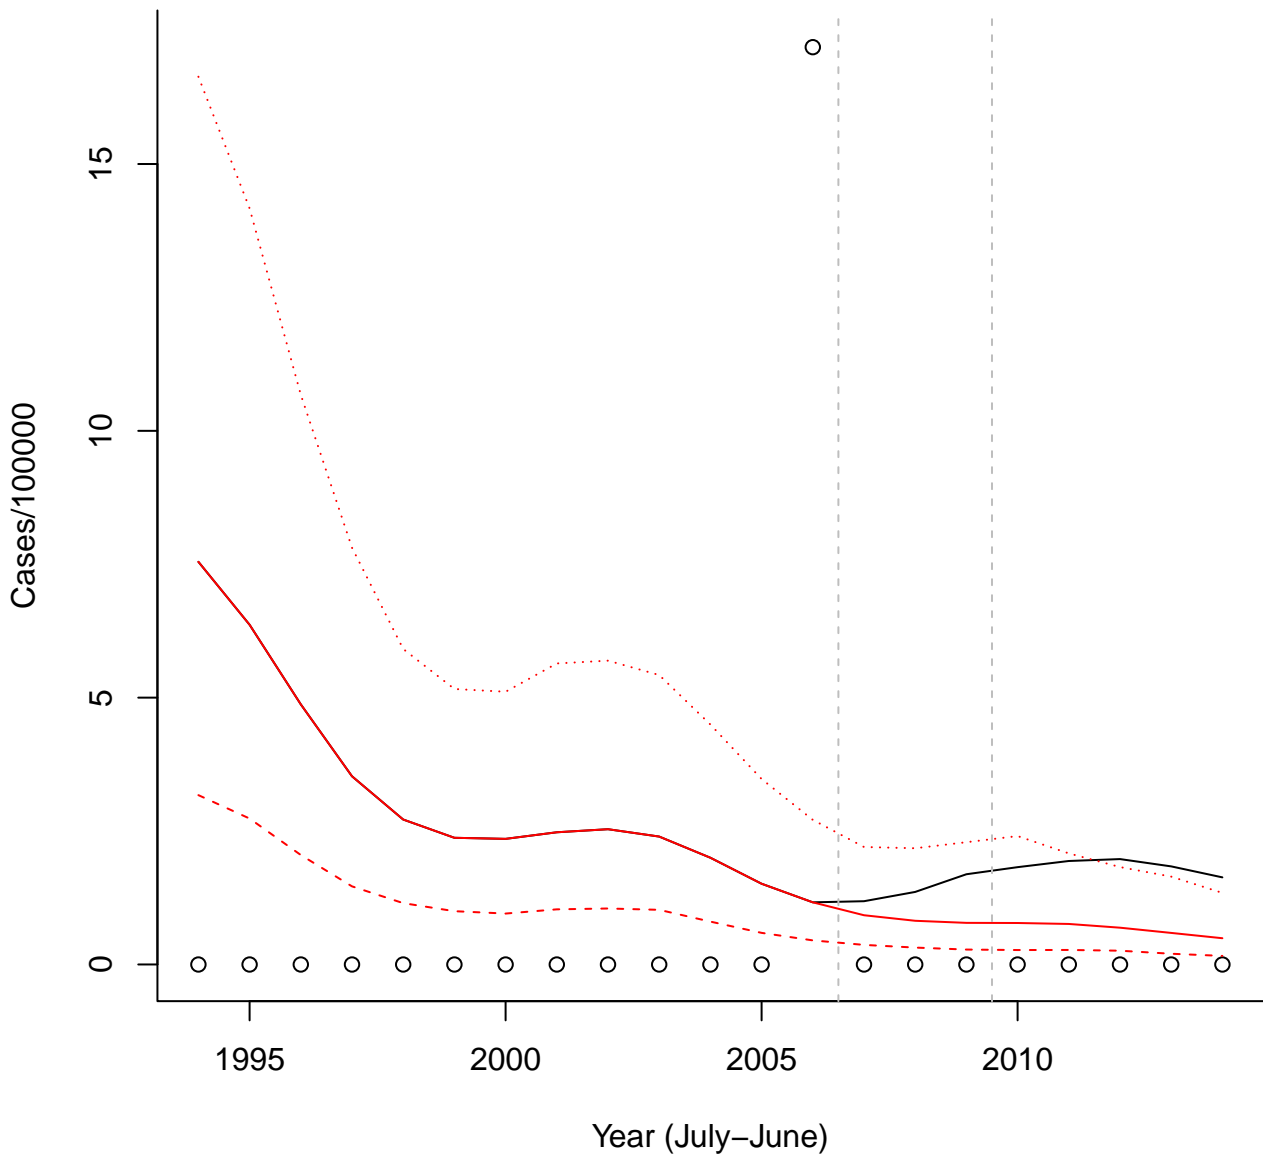

# <5y With comorbidity Serotype 14

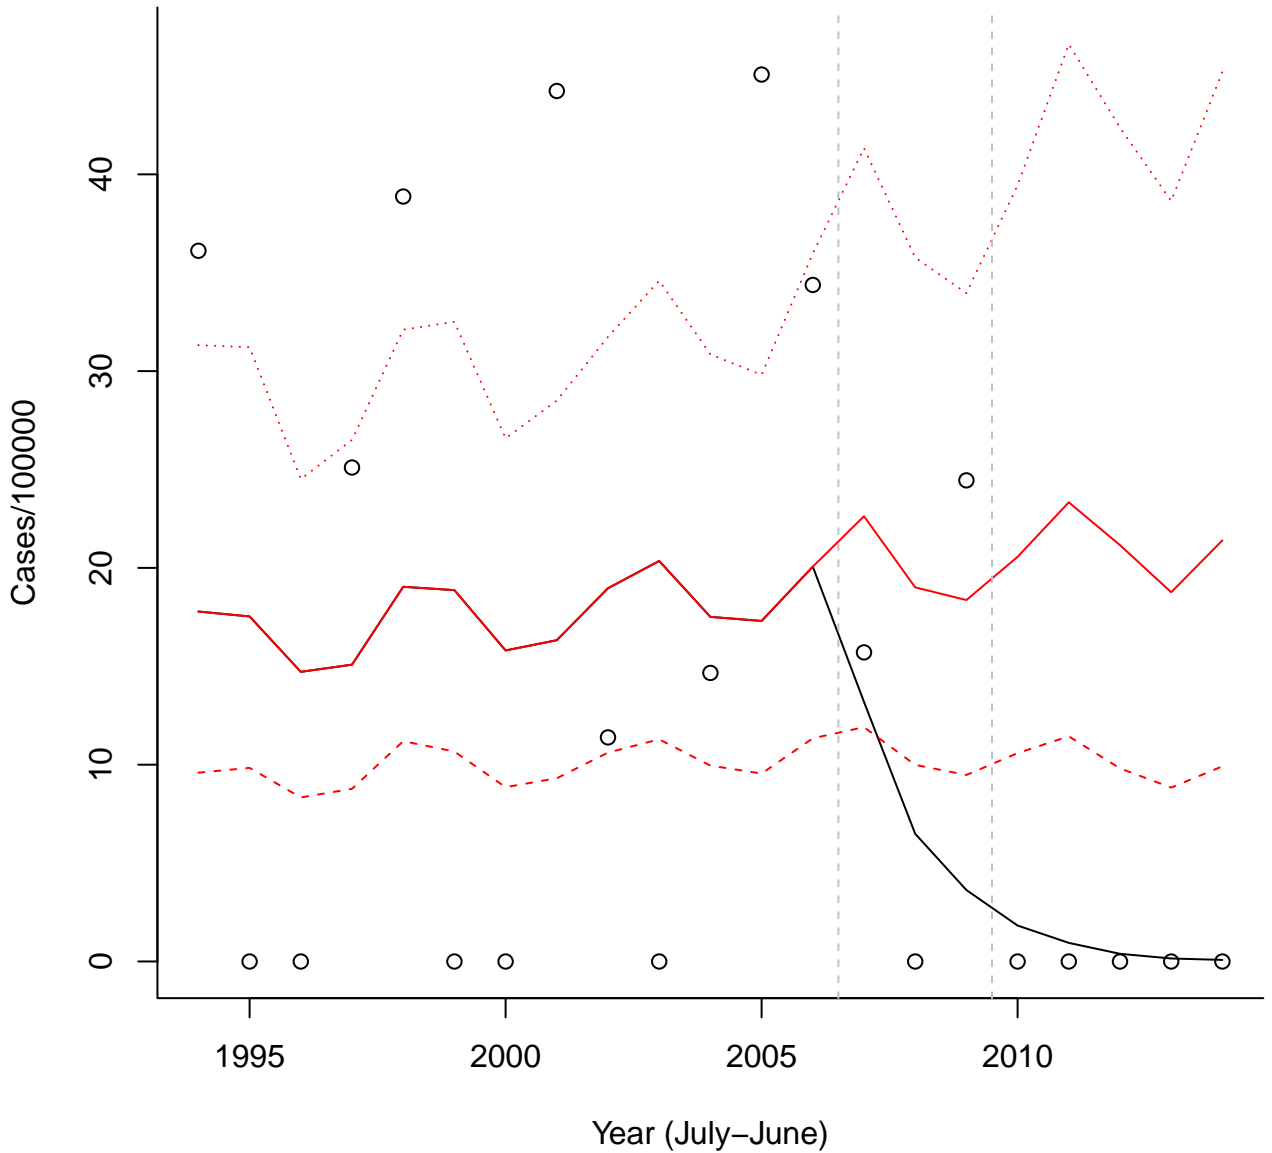

# <5y With comorbidity Serotype 15BC

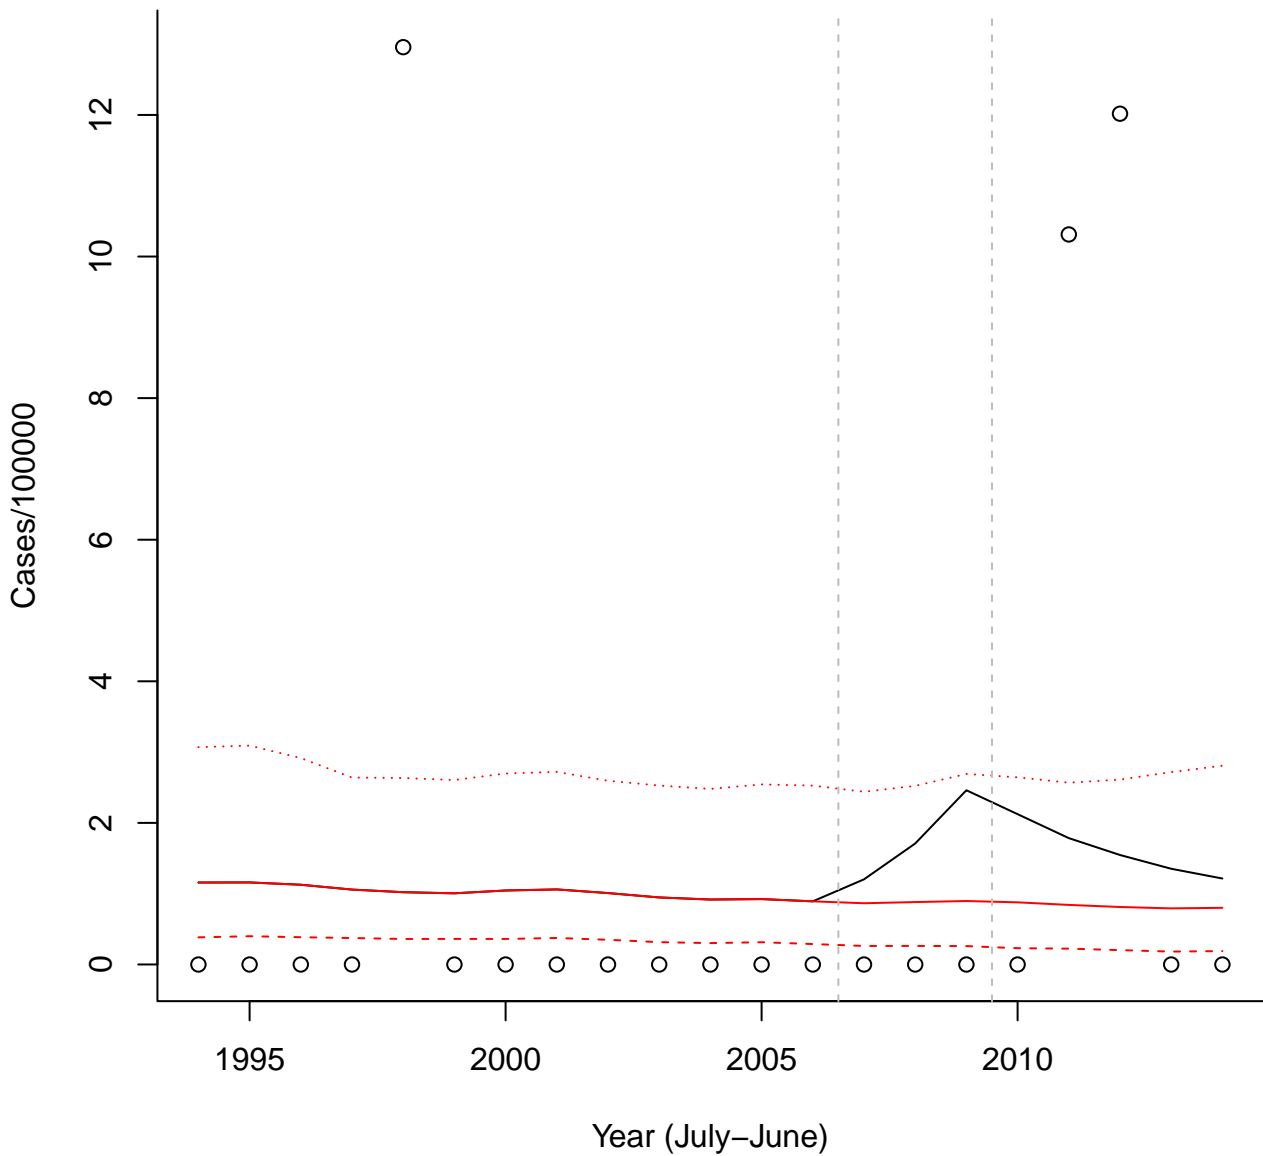



# <5y With comorbidity Serotype 18C

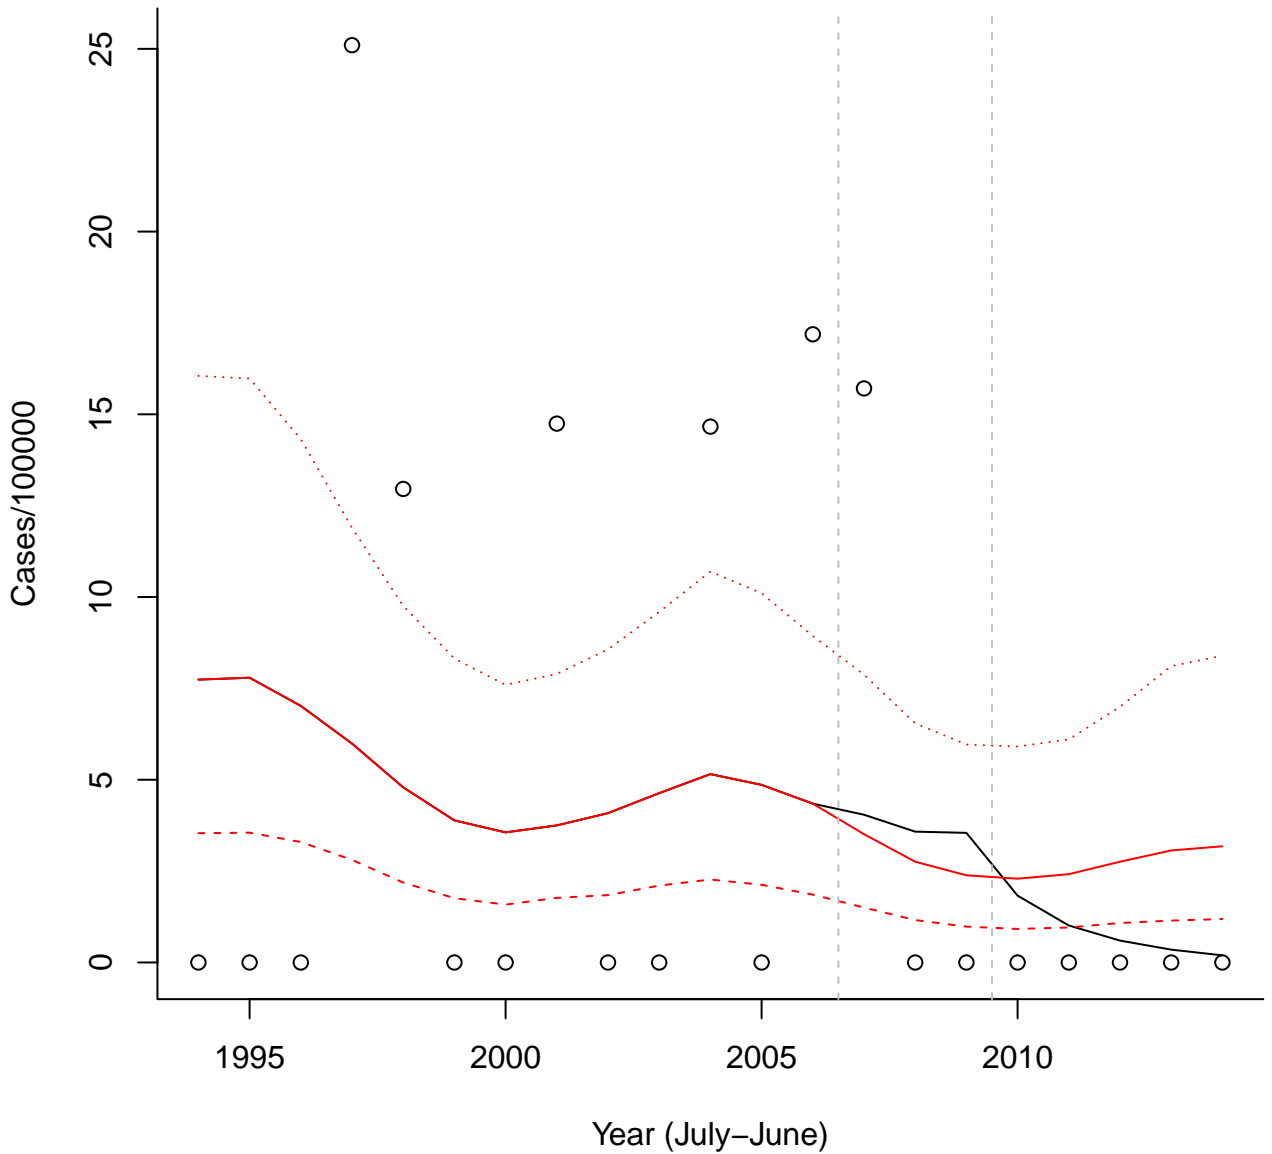

# <5y With comorbidity Serotype 19A

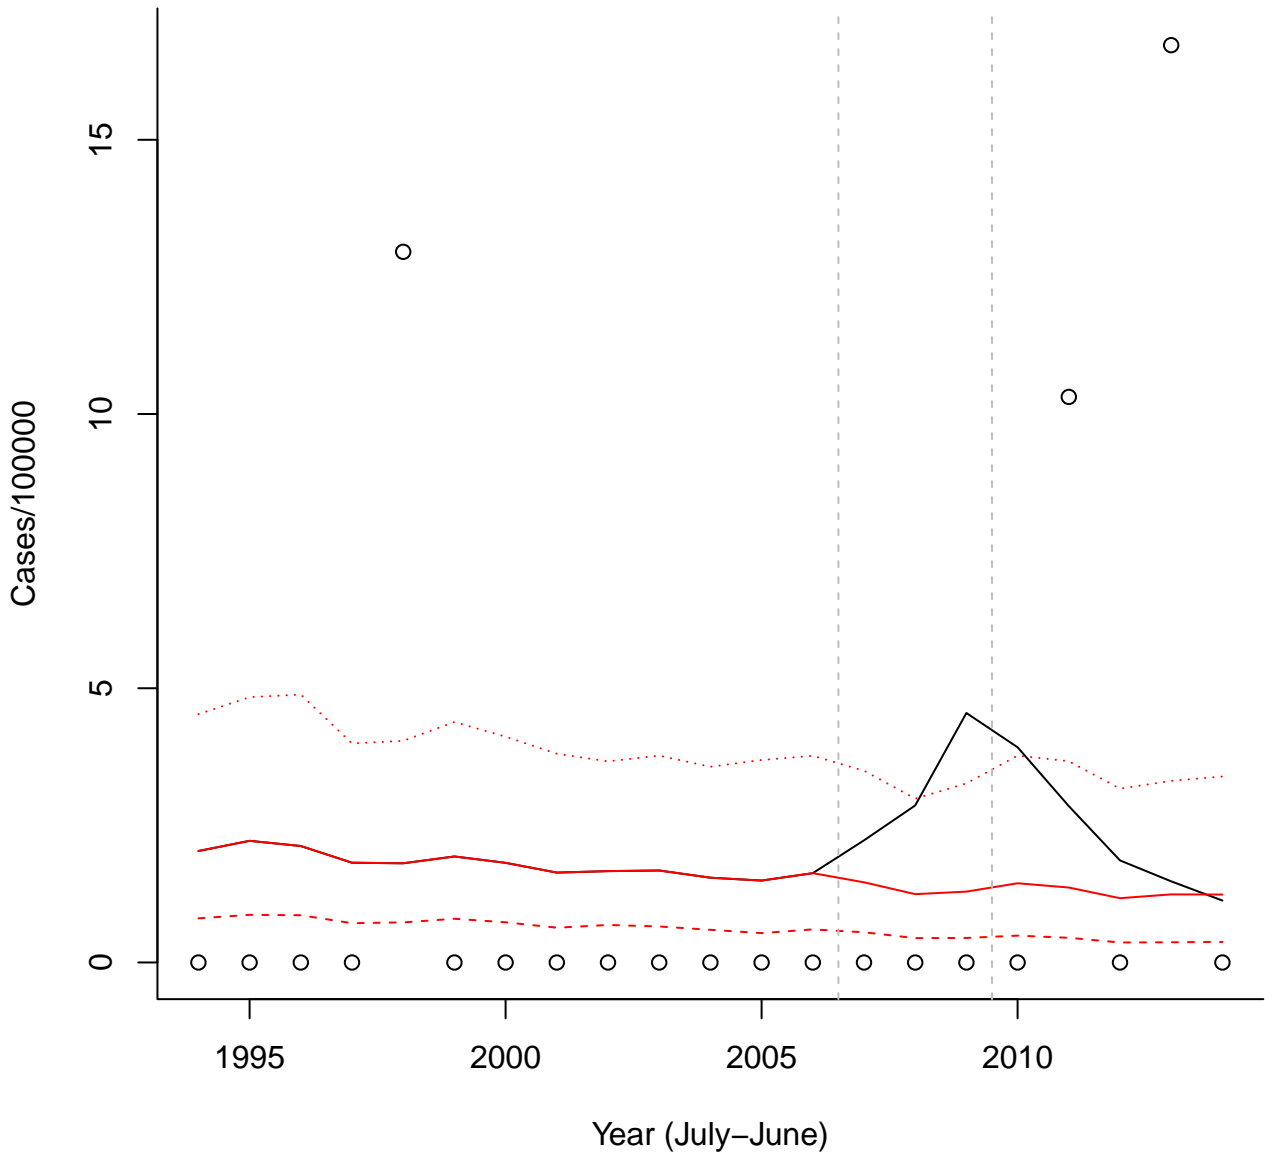

# <5y With comorbidity Serotype 19F

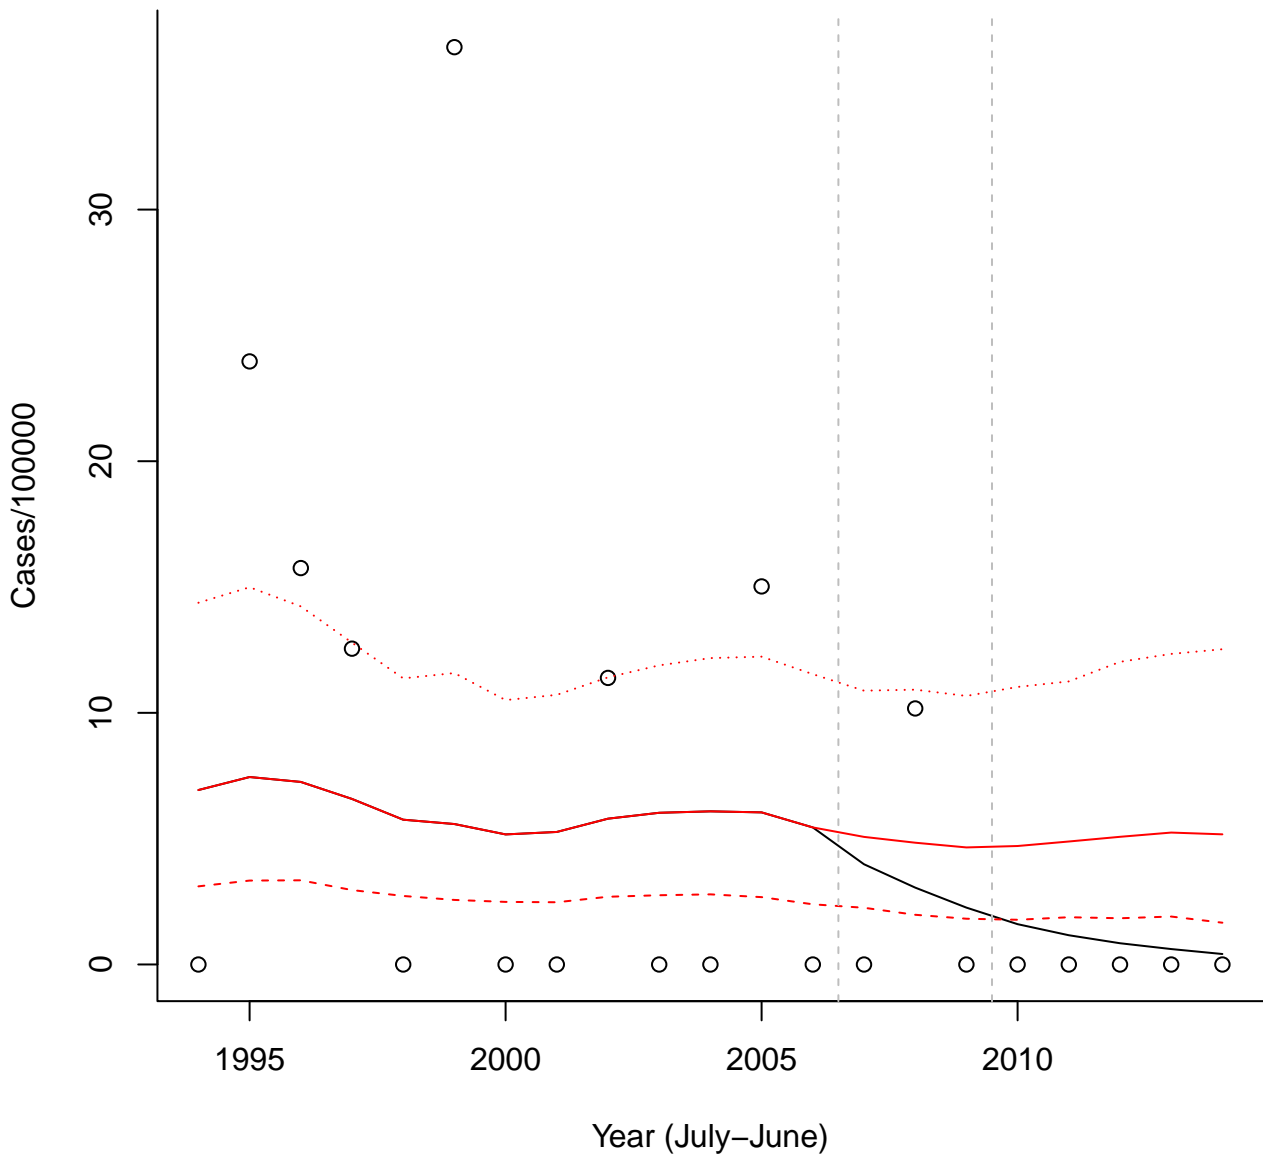

# <5y With comorbidity Serotype 21

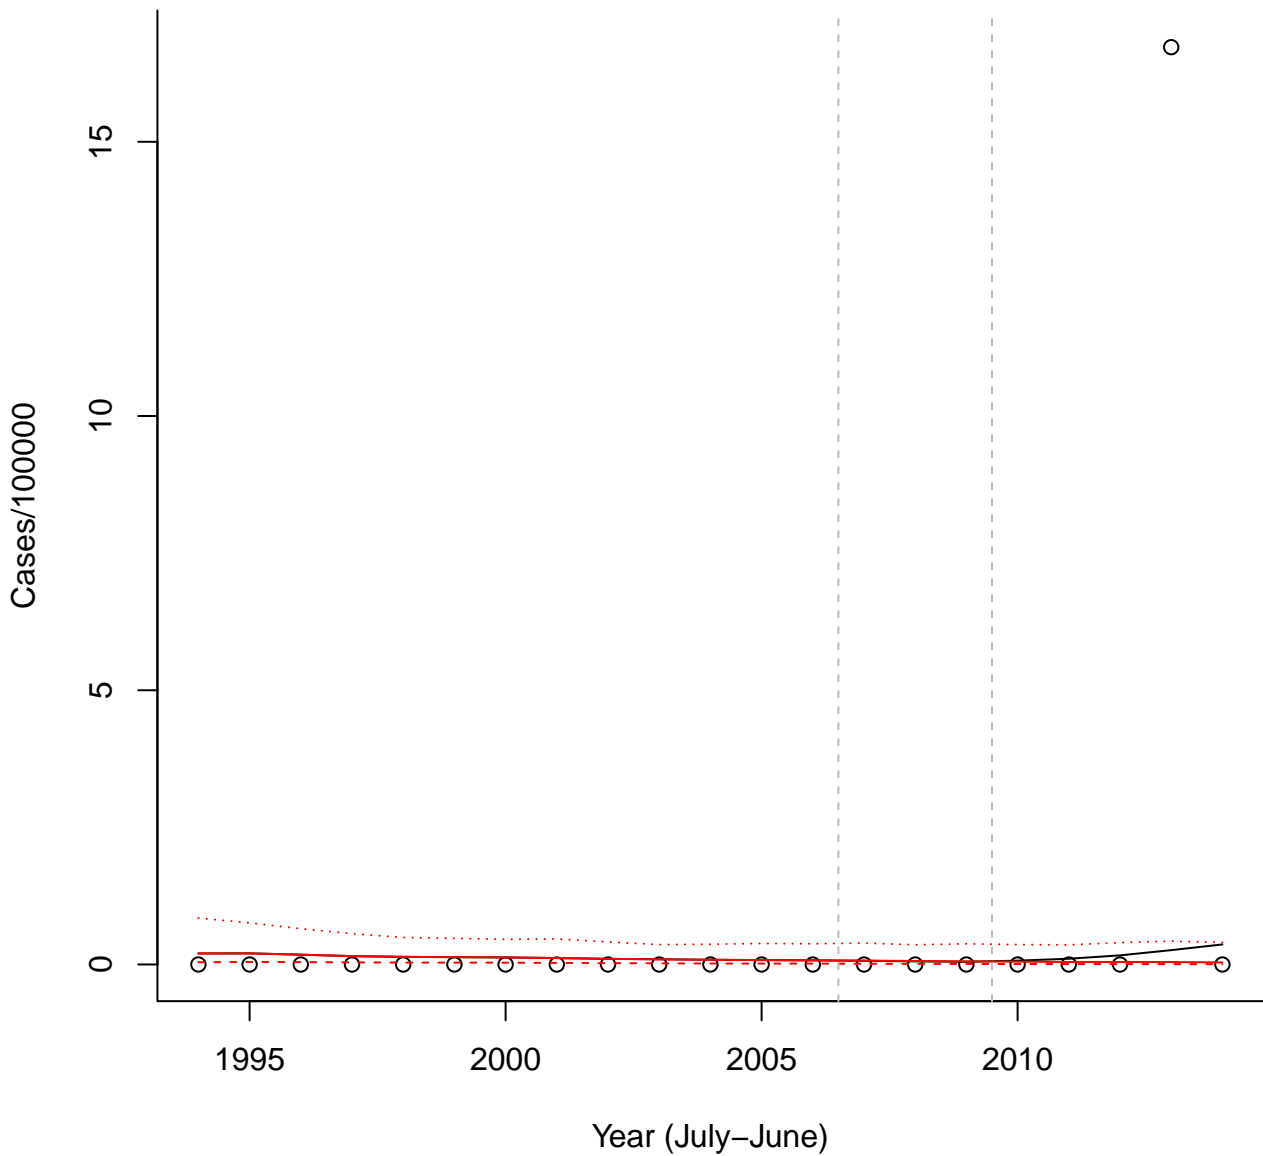

# <5y With comorbidity Serotype 22F

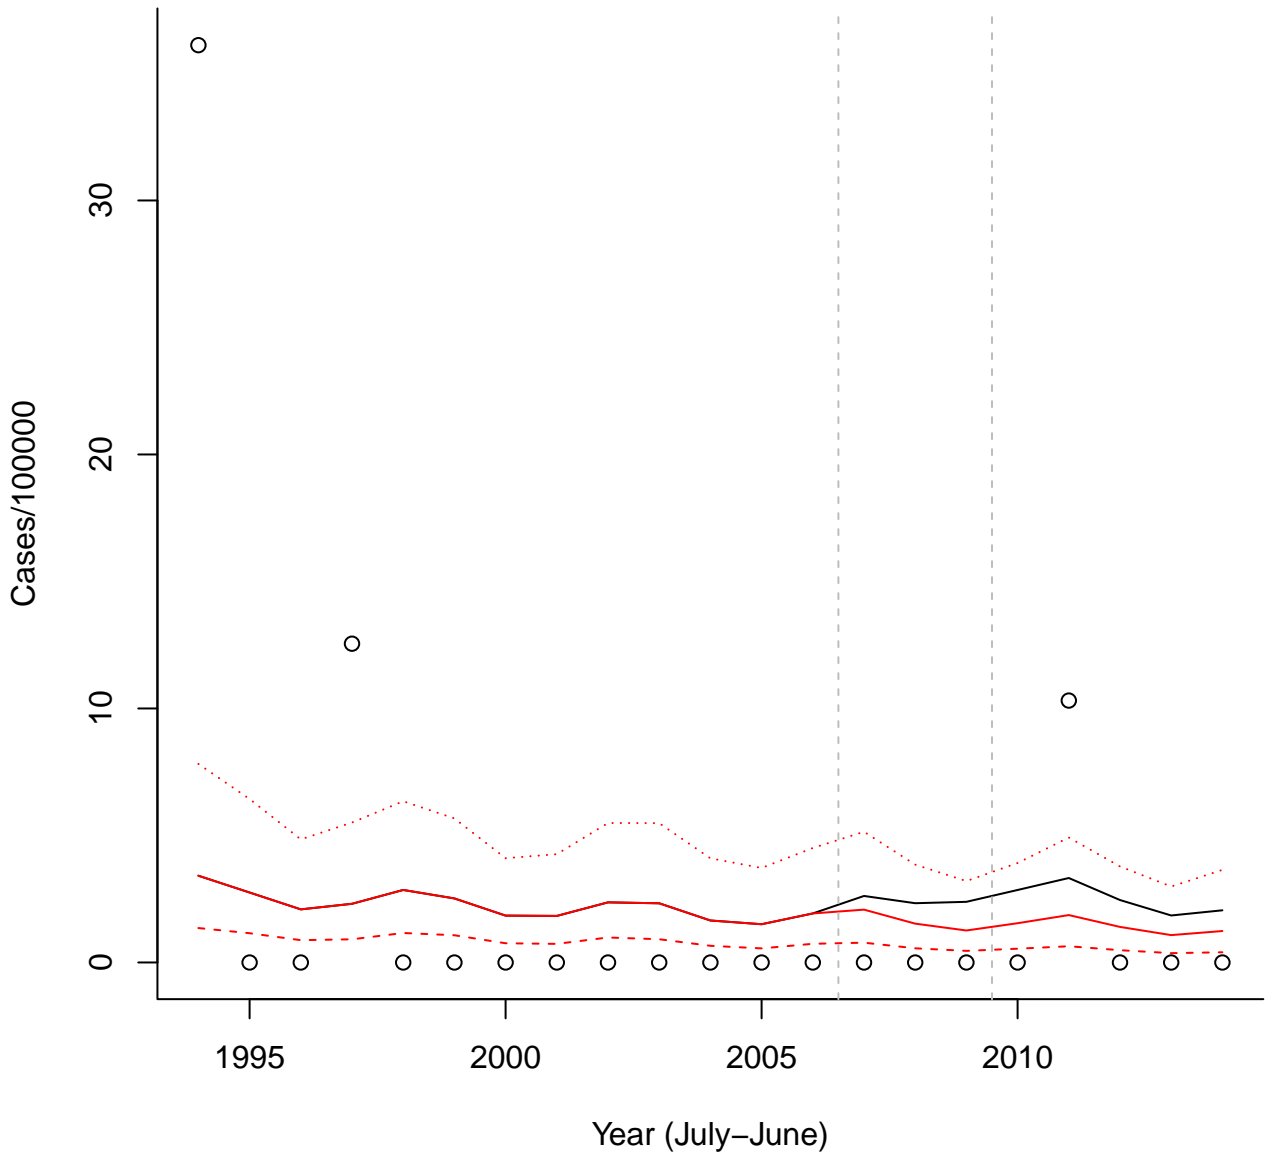

# <5y With comorbidity Serotype 23B

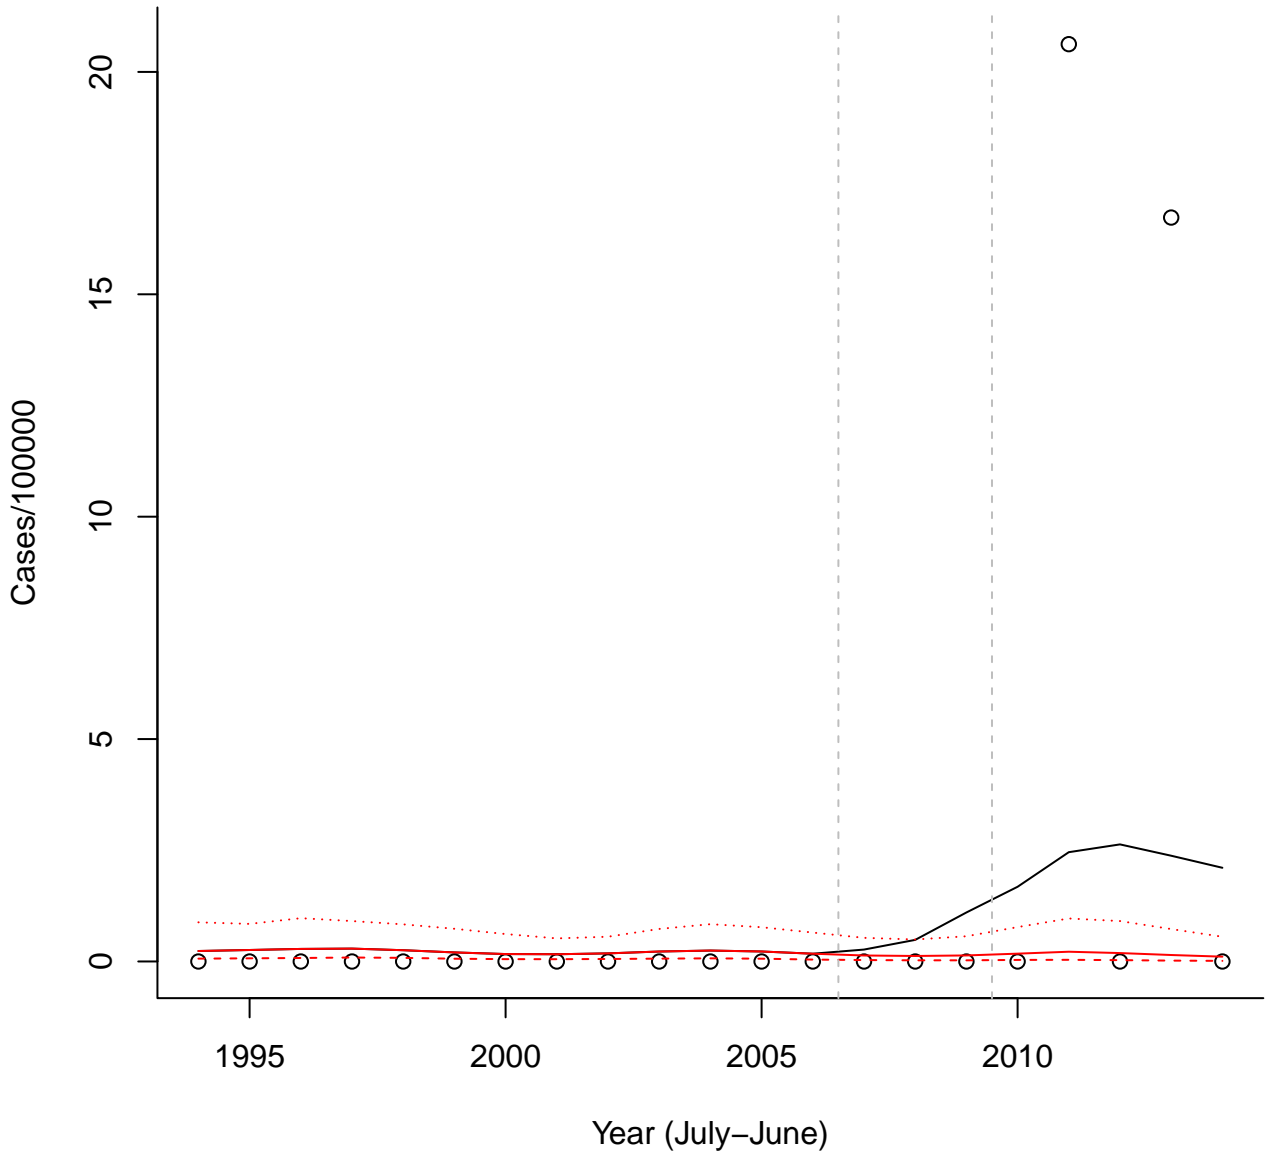

# <5y With comorbidity Serotype 23F

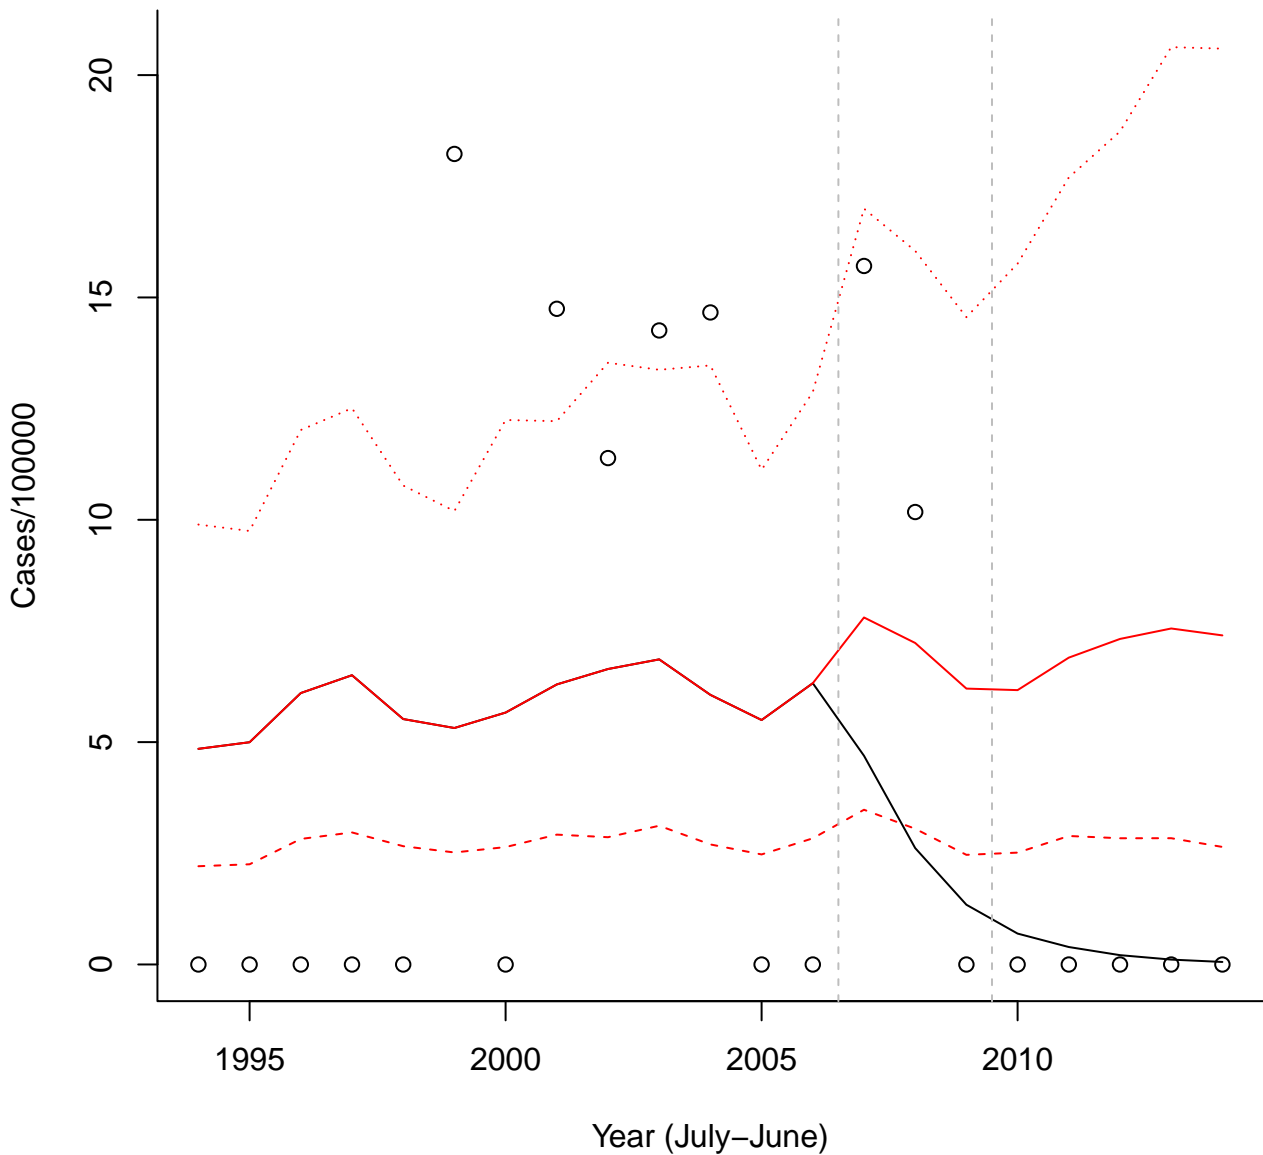

# <5y With comorbidity Serotype 24F

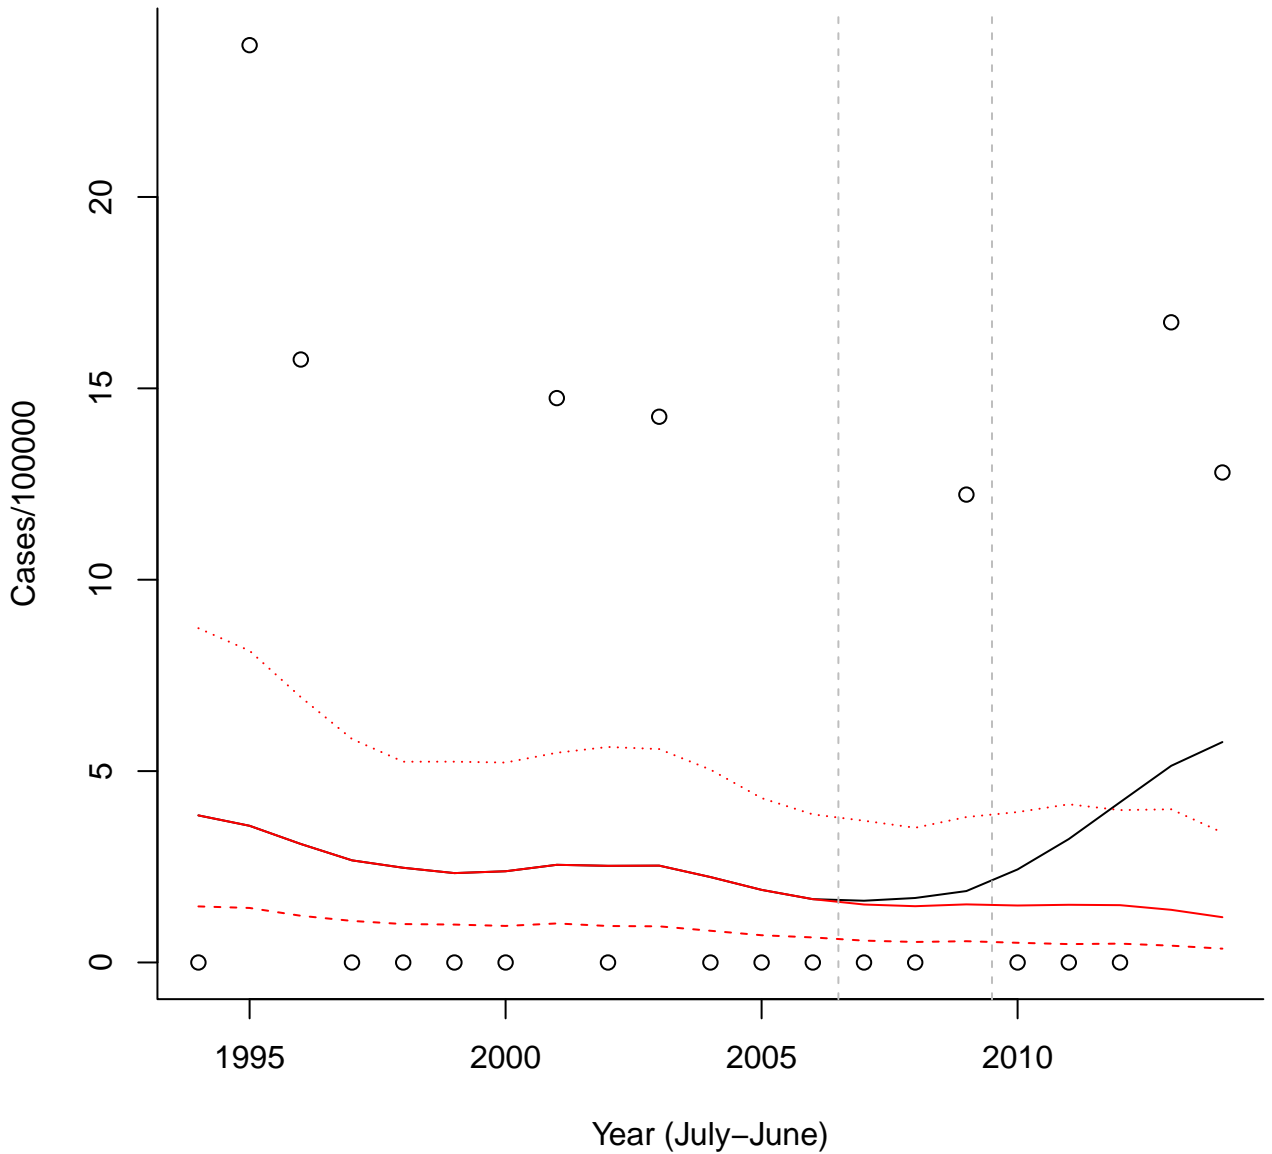



# <5y With comorbidity Serotype 33F

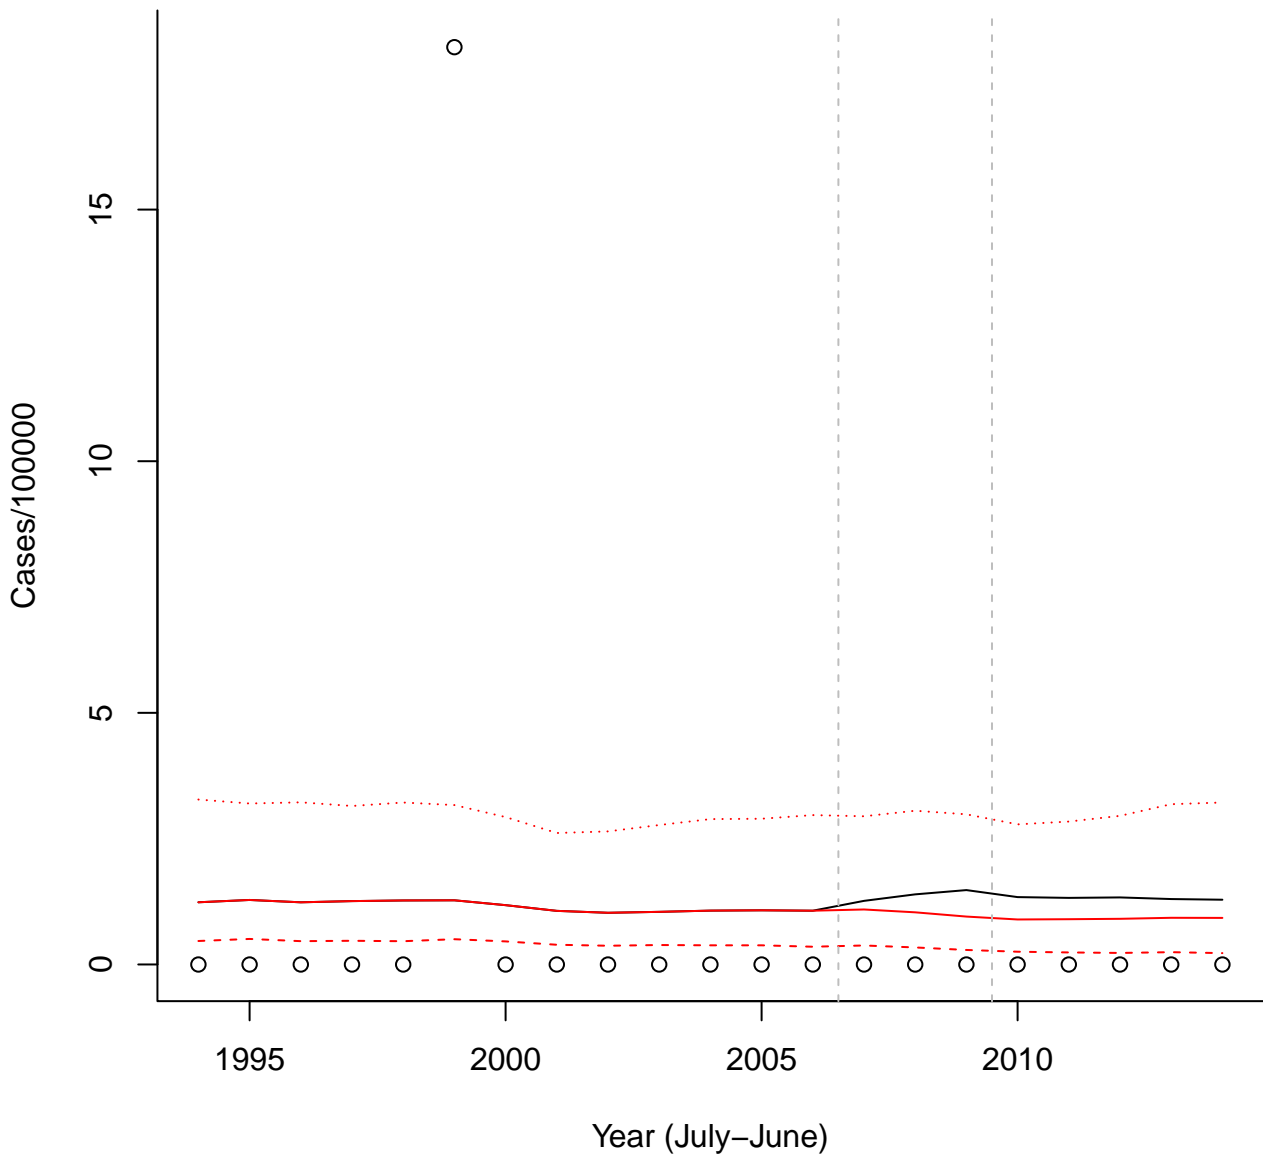

# <5y With comorbidity Serotype 35B

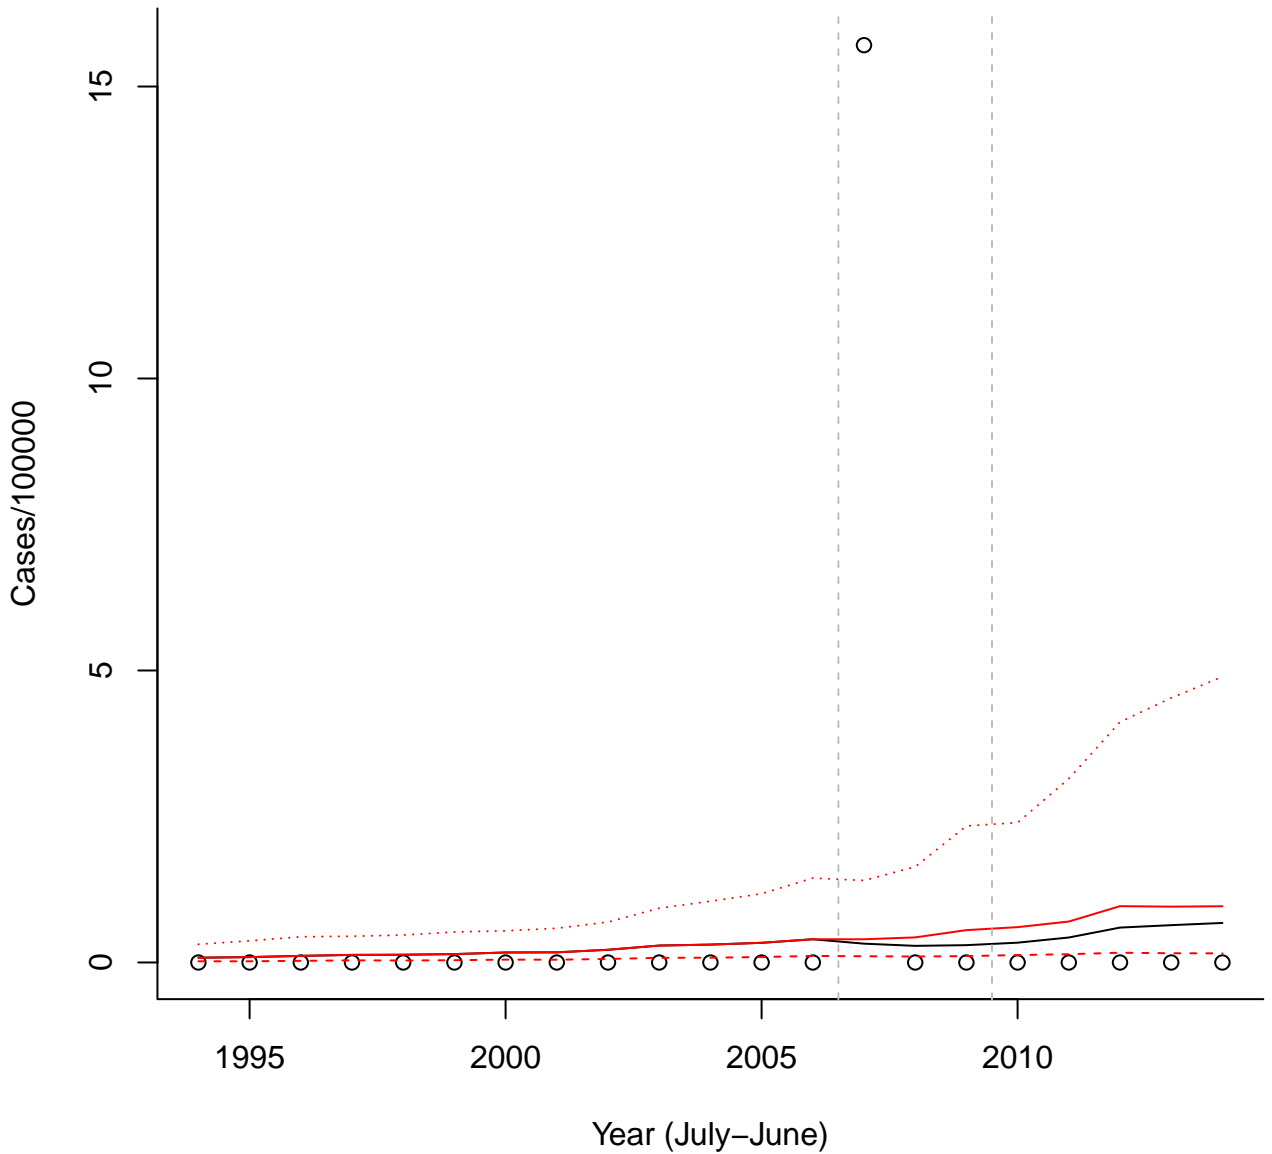

# <5y With comorbidity Serotype 35F

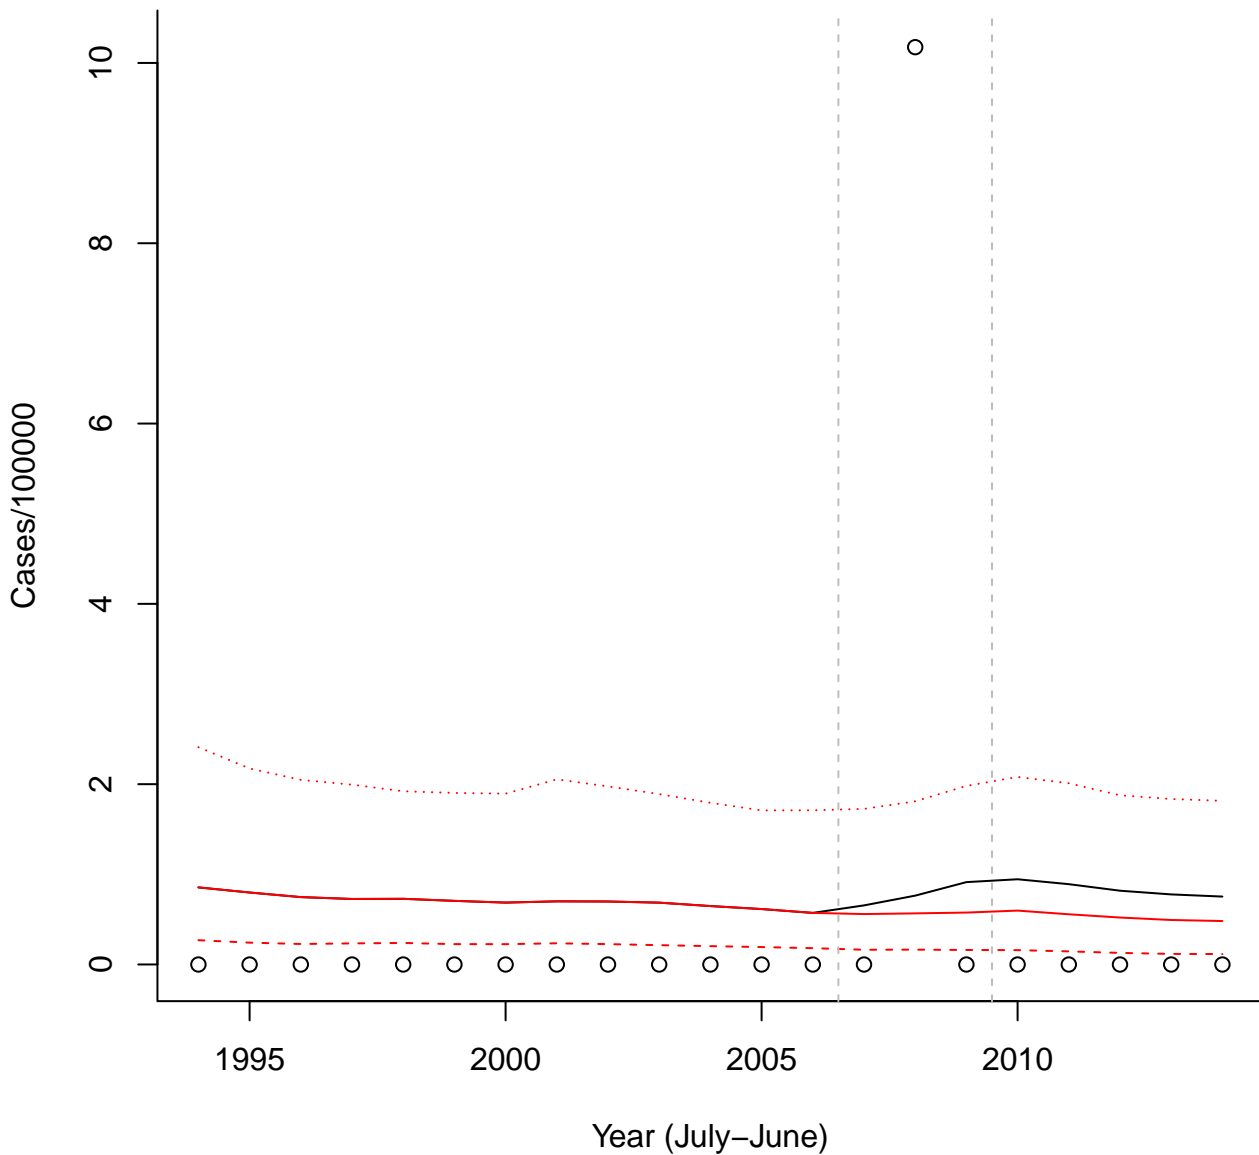

# <5y With comorbidity Serotype 38

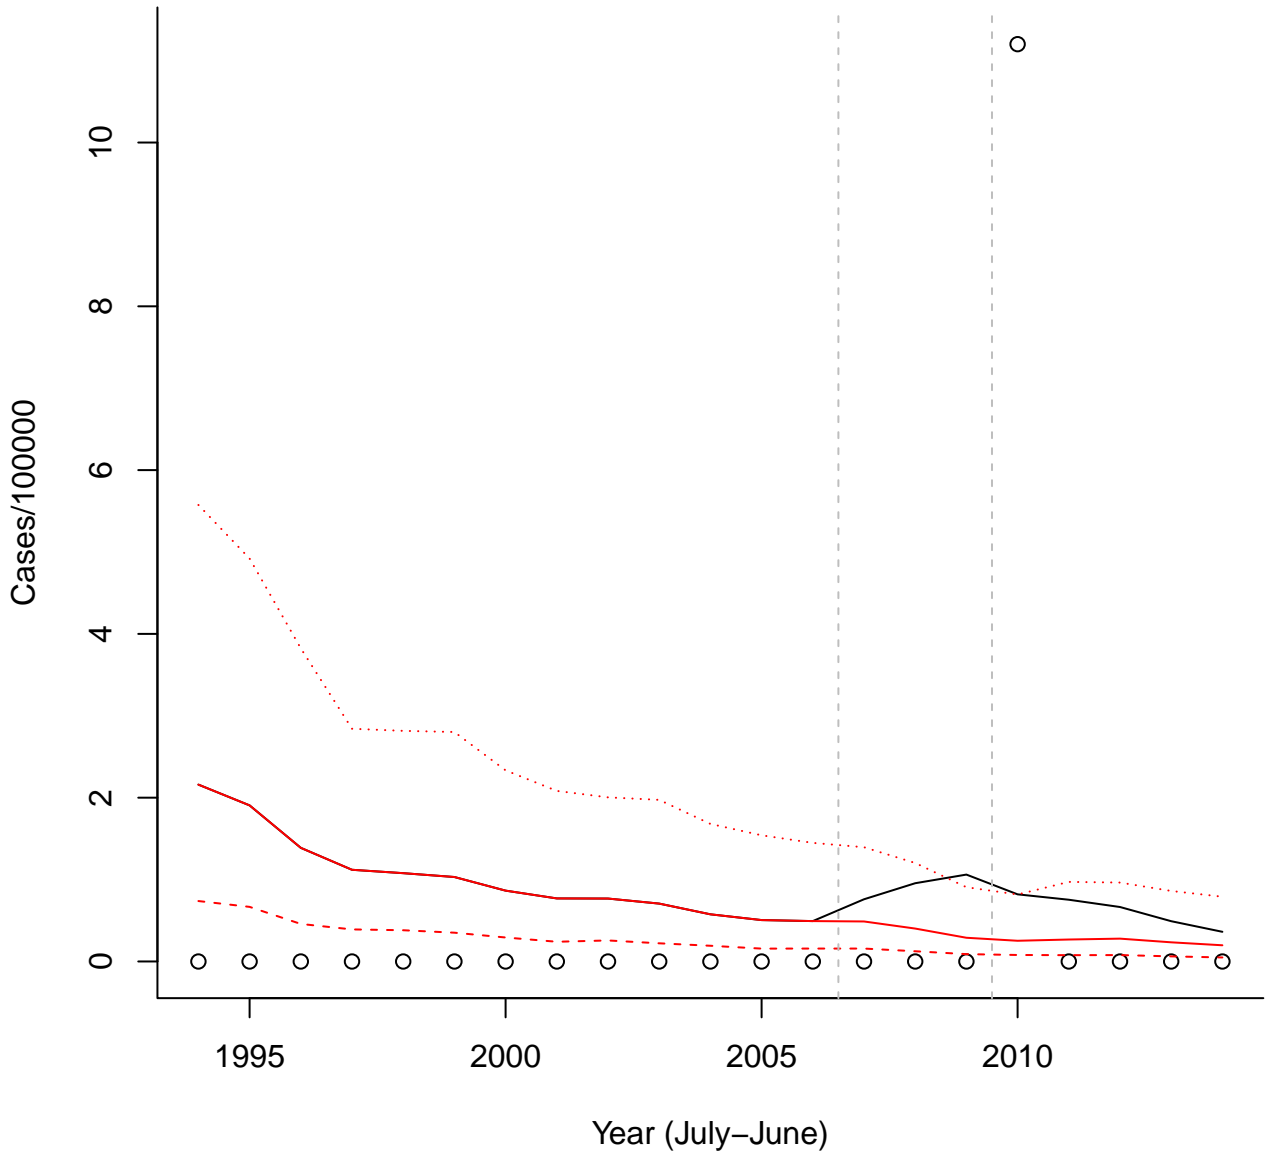

# <5y With comorbidity Serotype 4

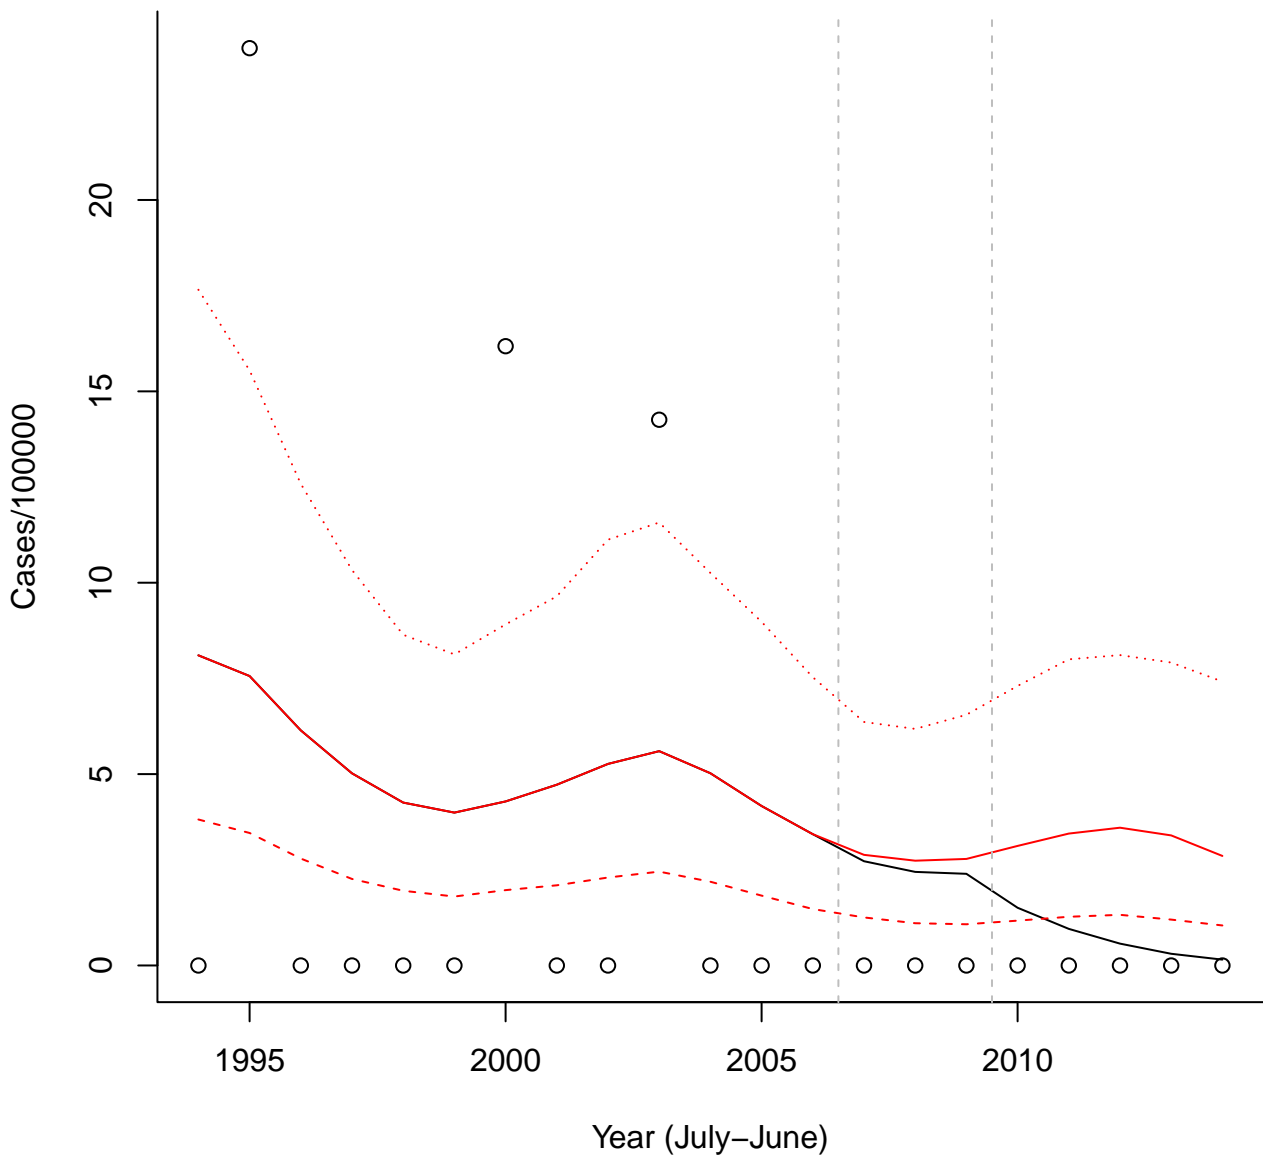

# <5y With comorbidity Serotype 6A

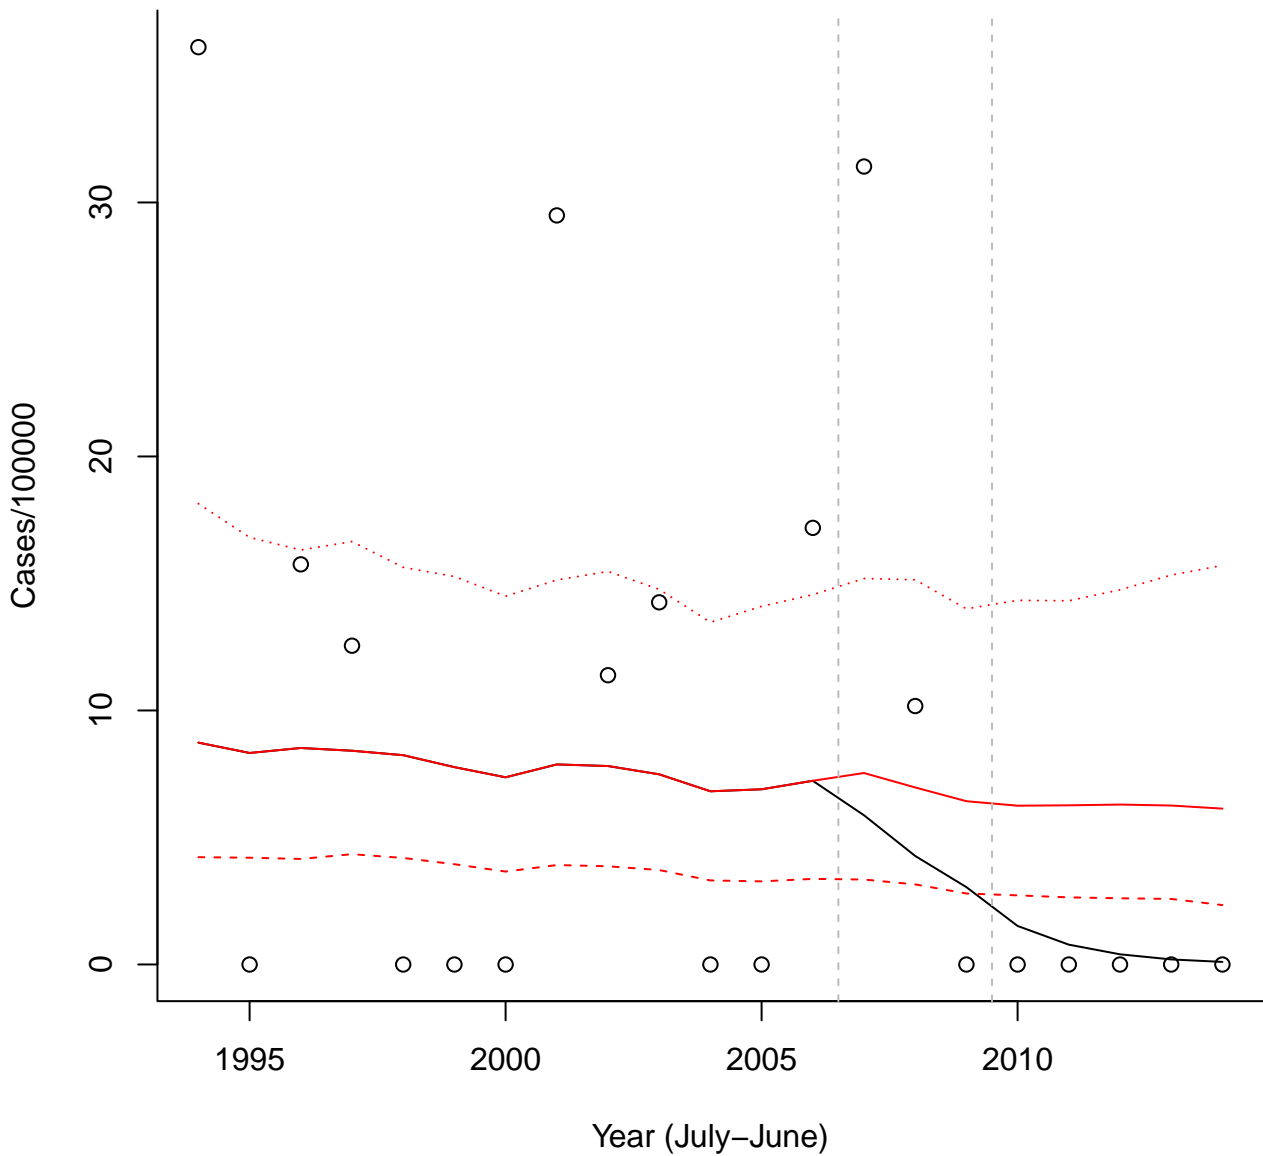

# <5y With comorbidity Serotype 6B

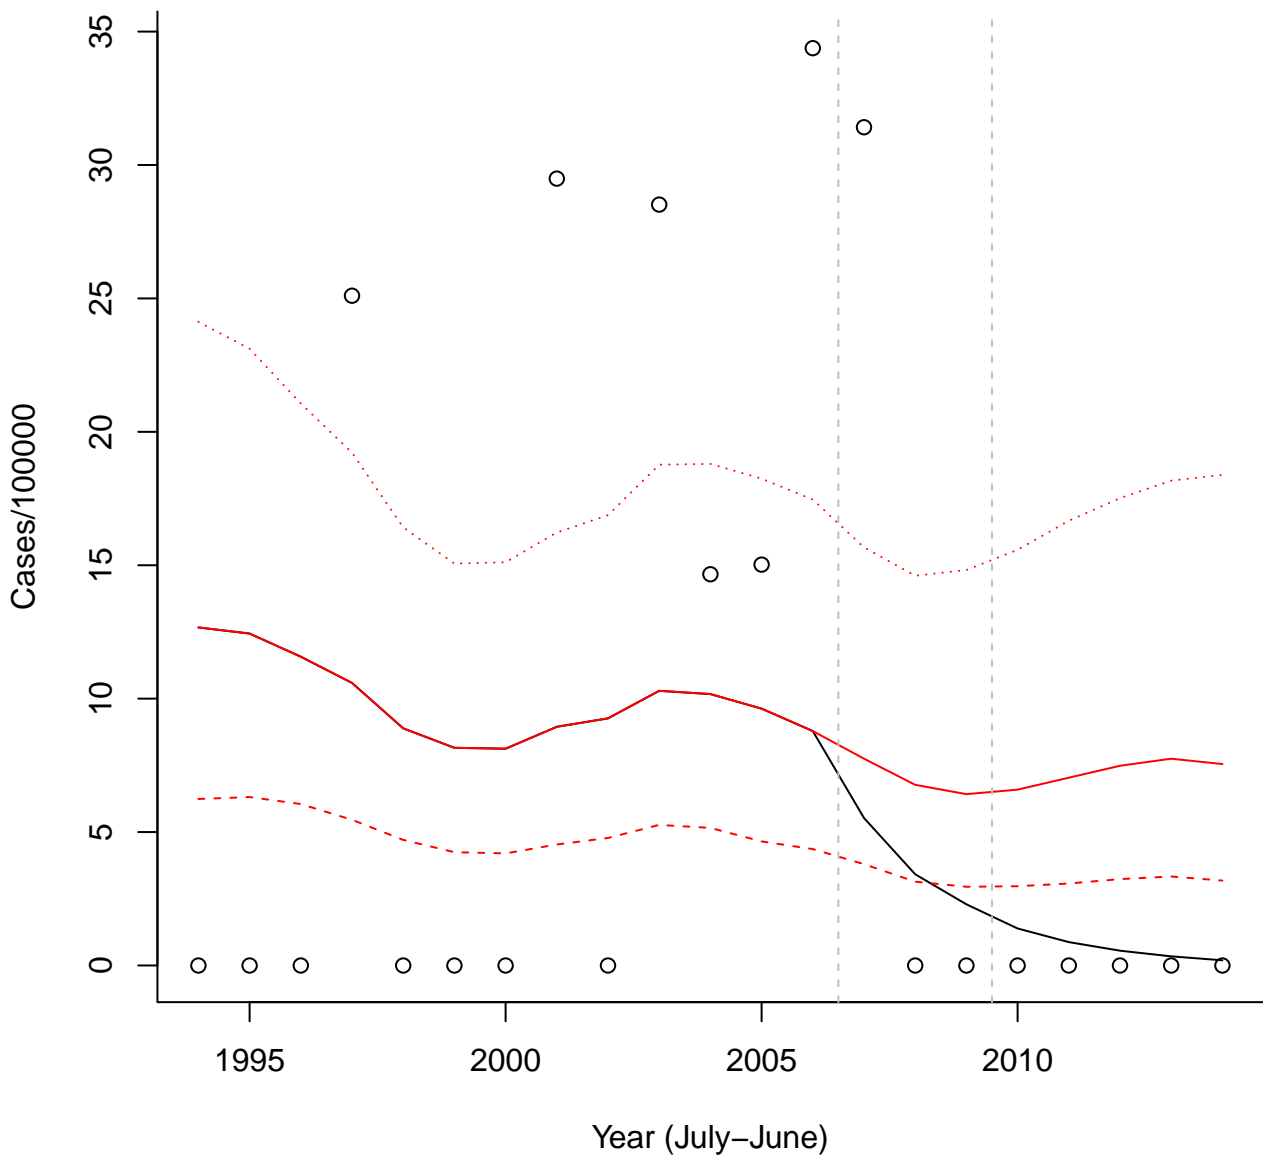

# <5y With comorbidity Serotype 7F

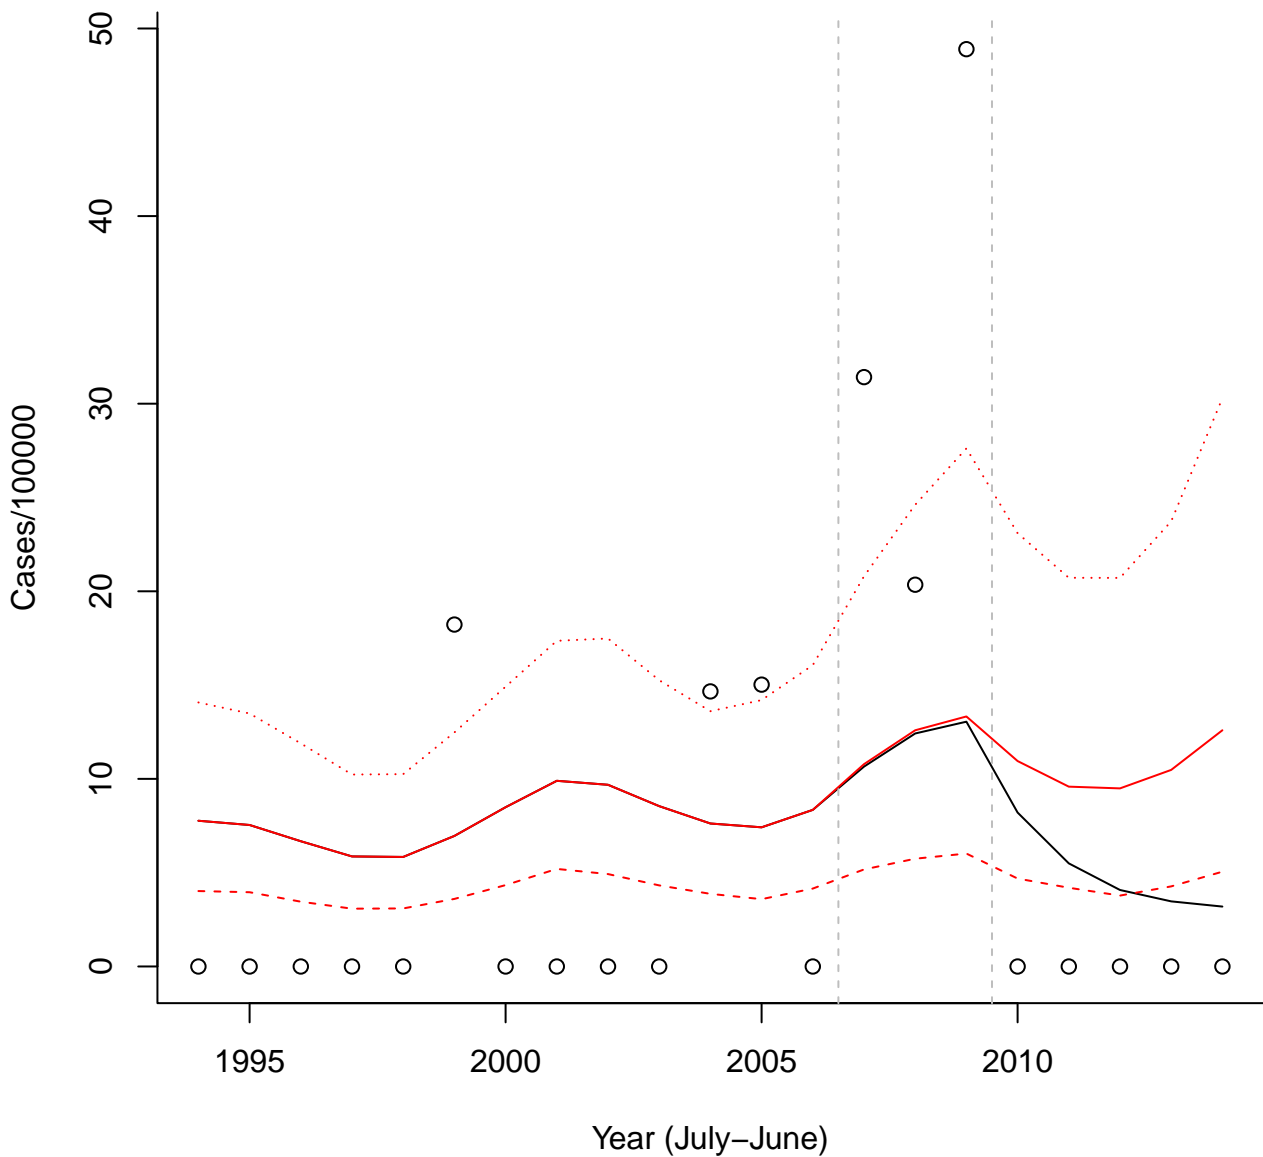



# <5y With comorbidity Serotype 8

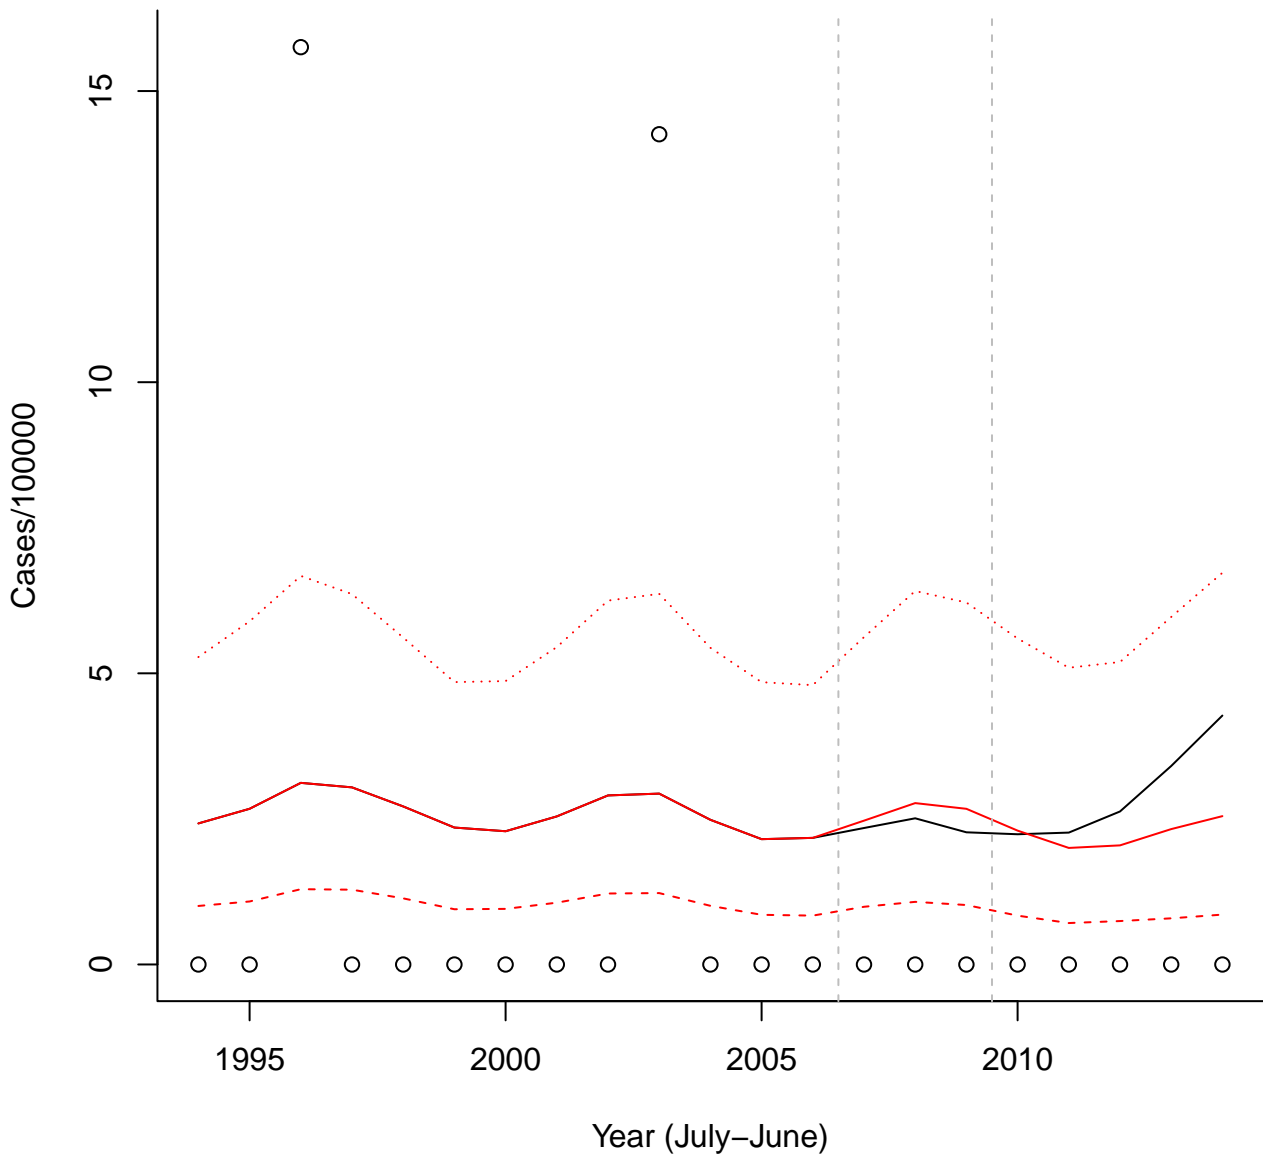

# <5y With comorbidity Serotype 9N

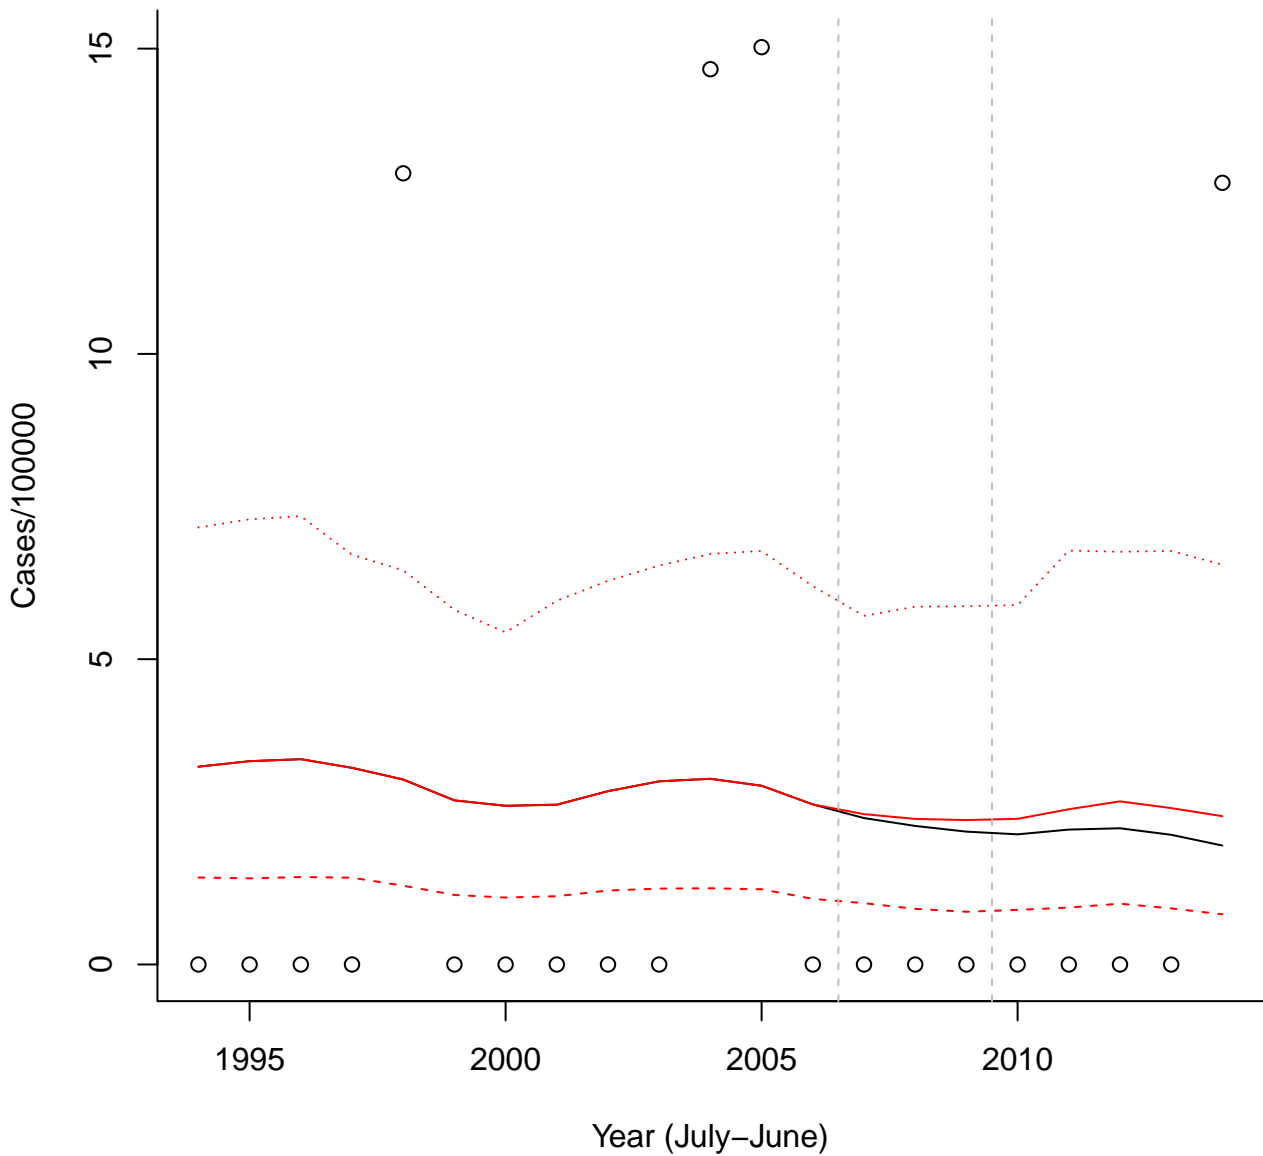

# <5y With comorbidity Serotype 9V

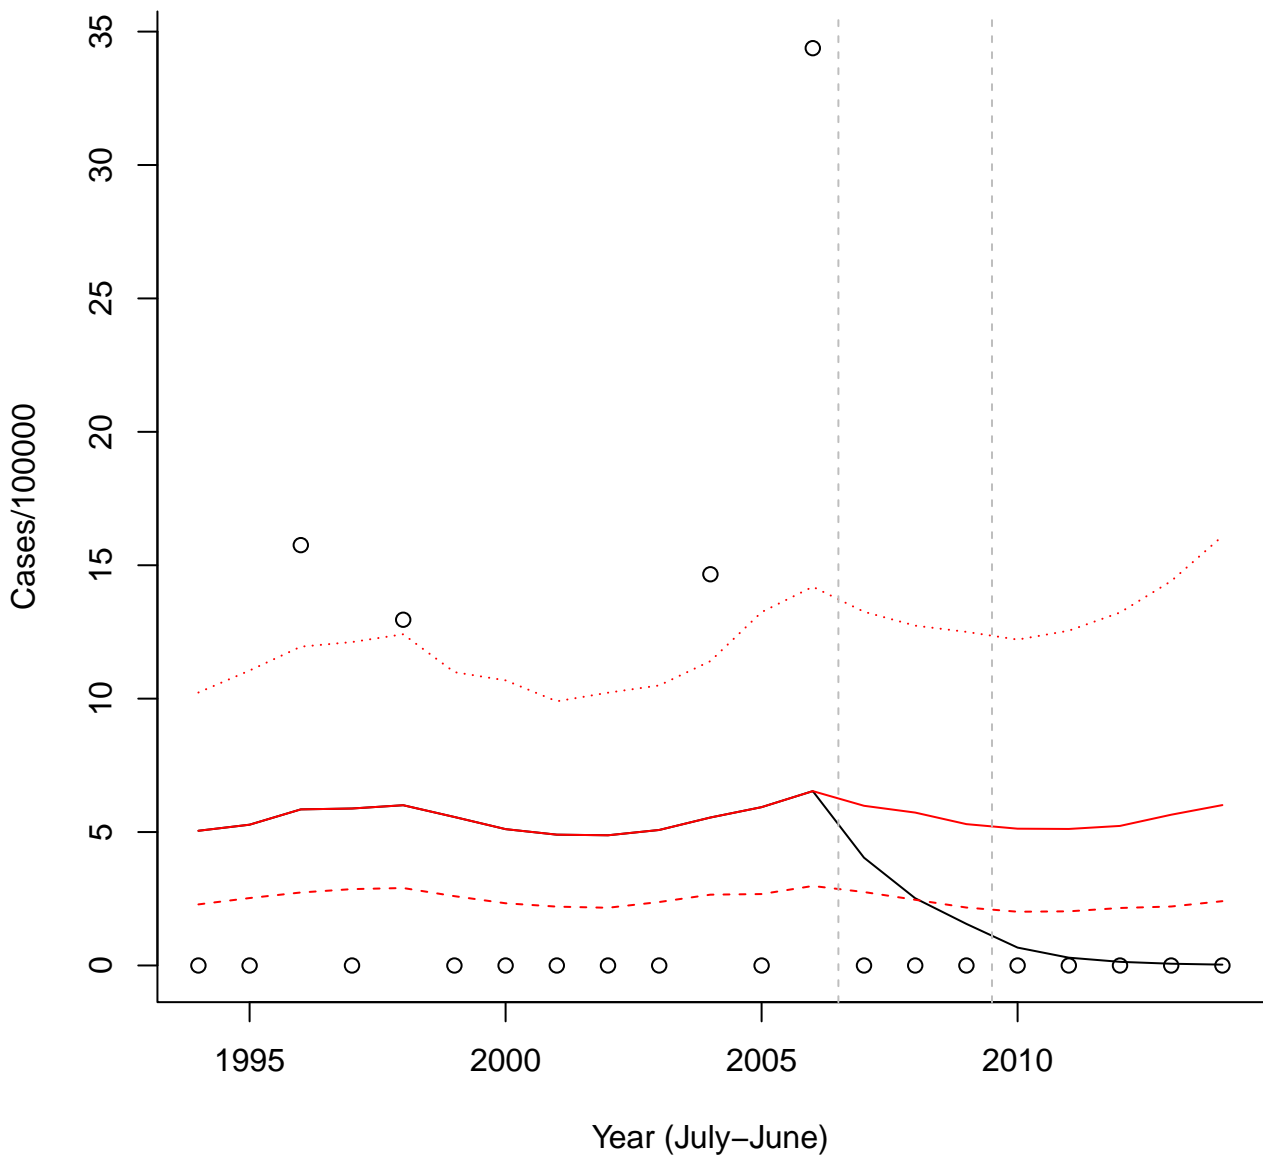

# 5-17y With comorbidity Serotype 1

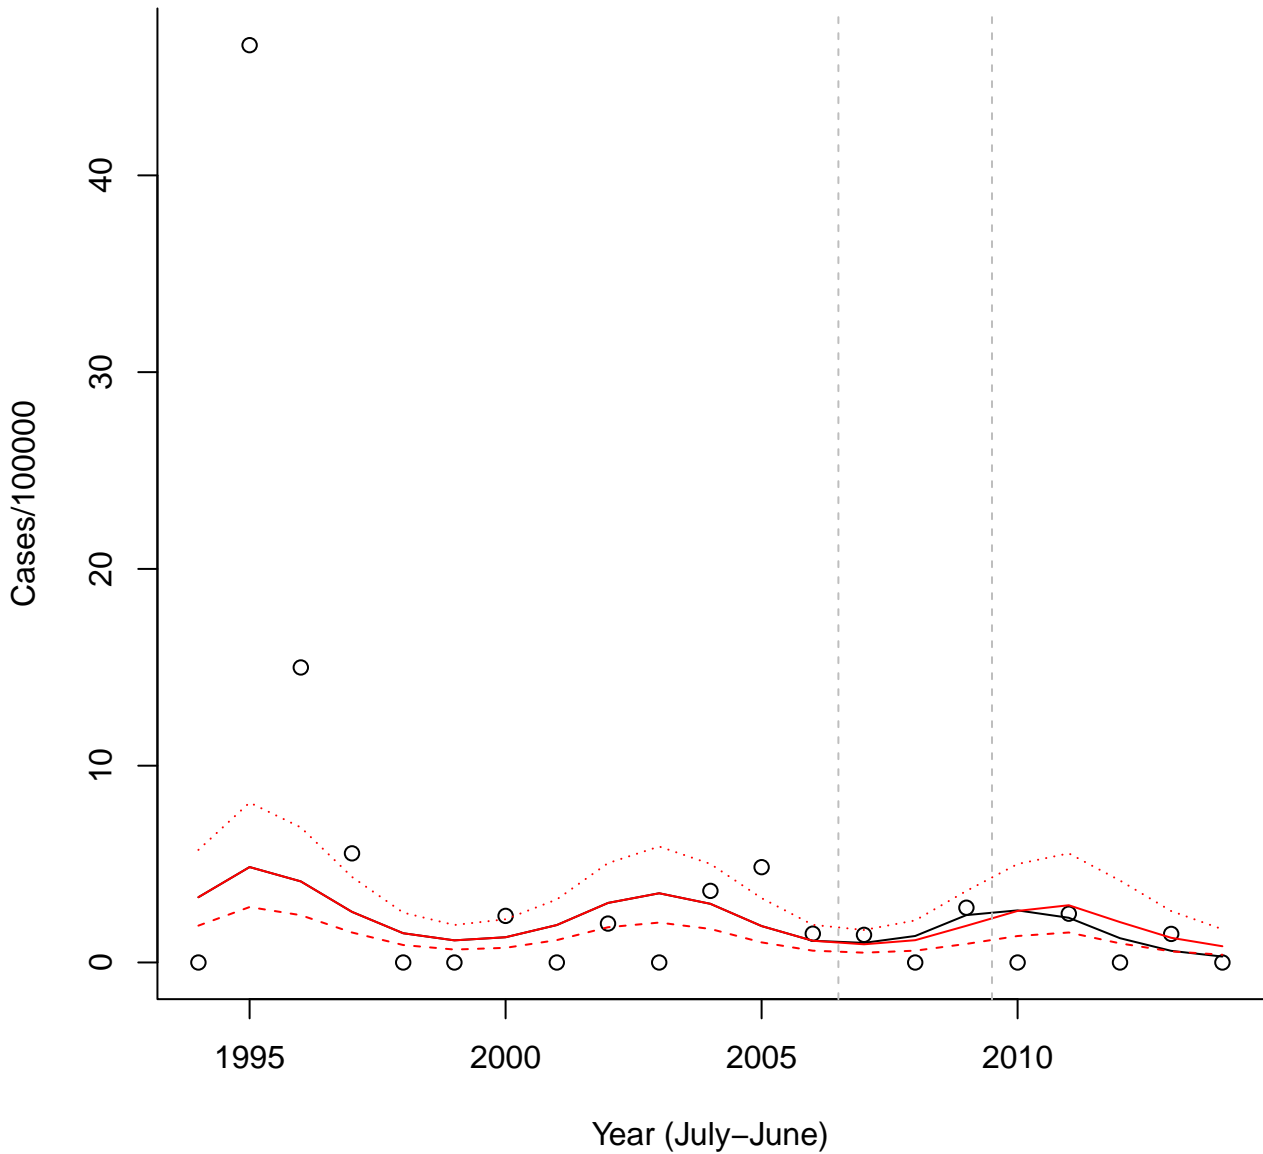

# 5-17y With comorbidity Serotype 10A

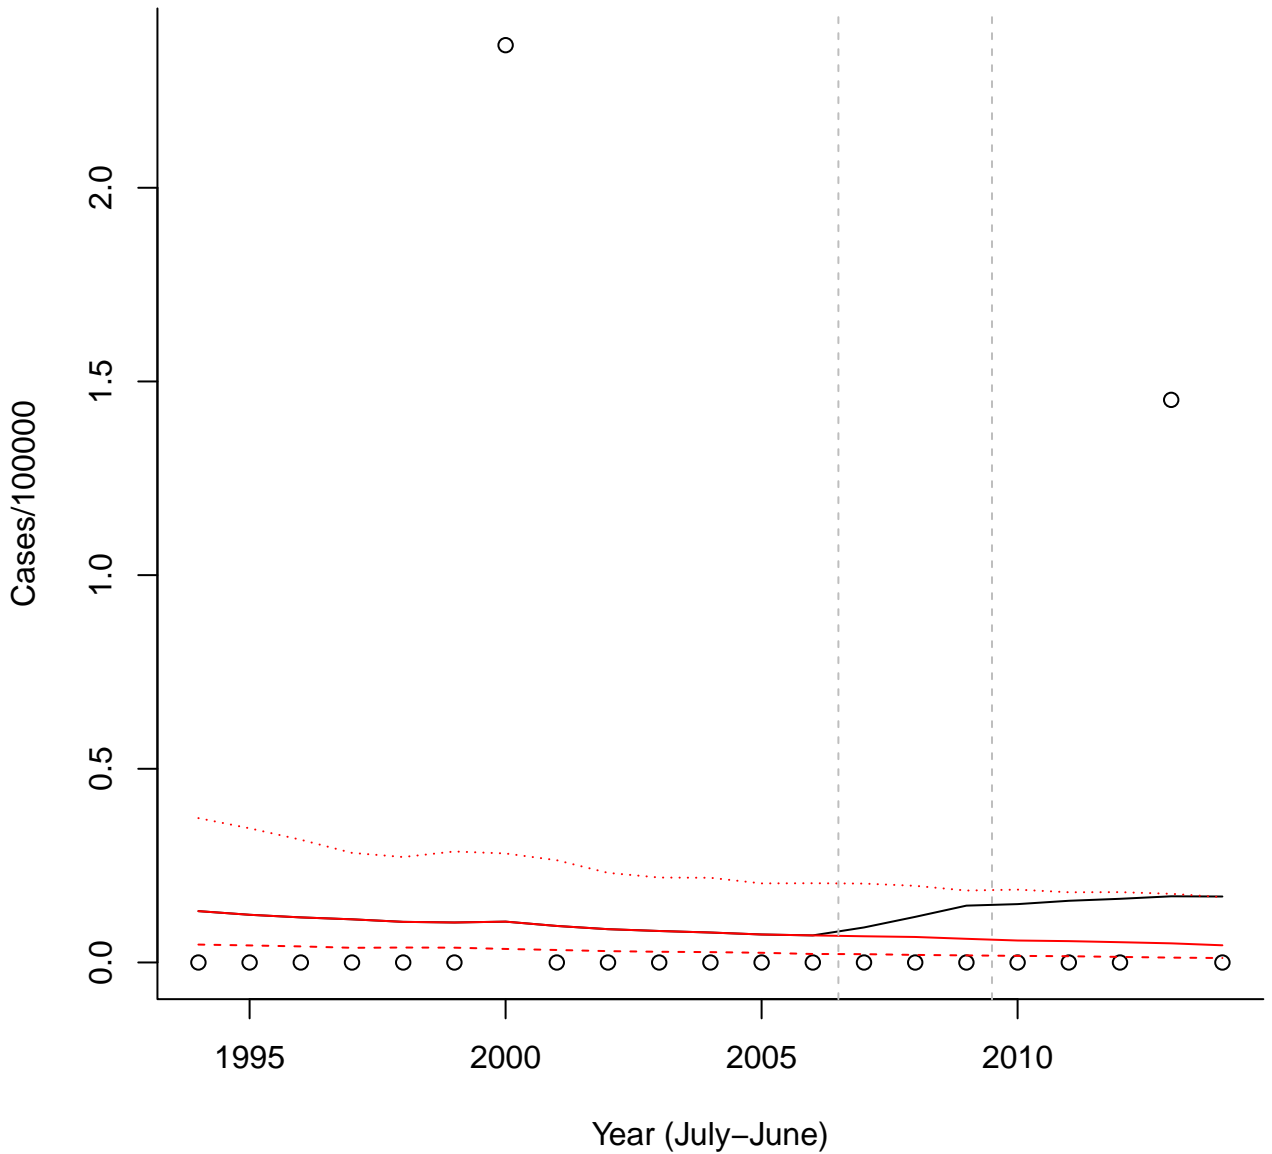

# 5-17y With comorbidity Serotype 11A

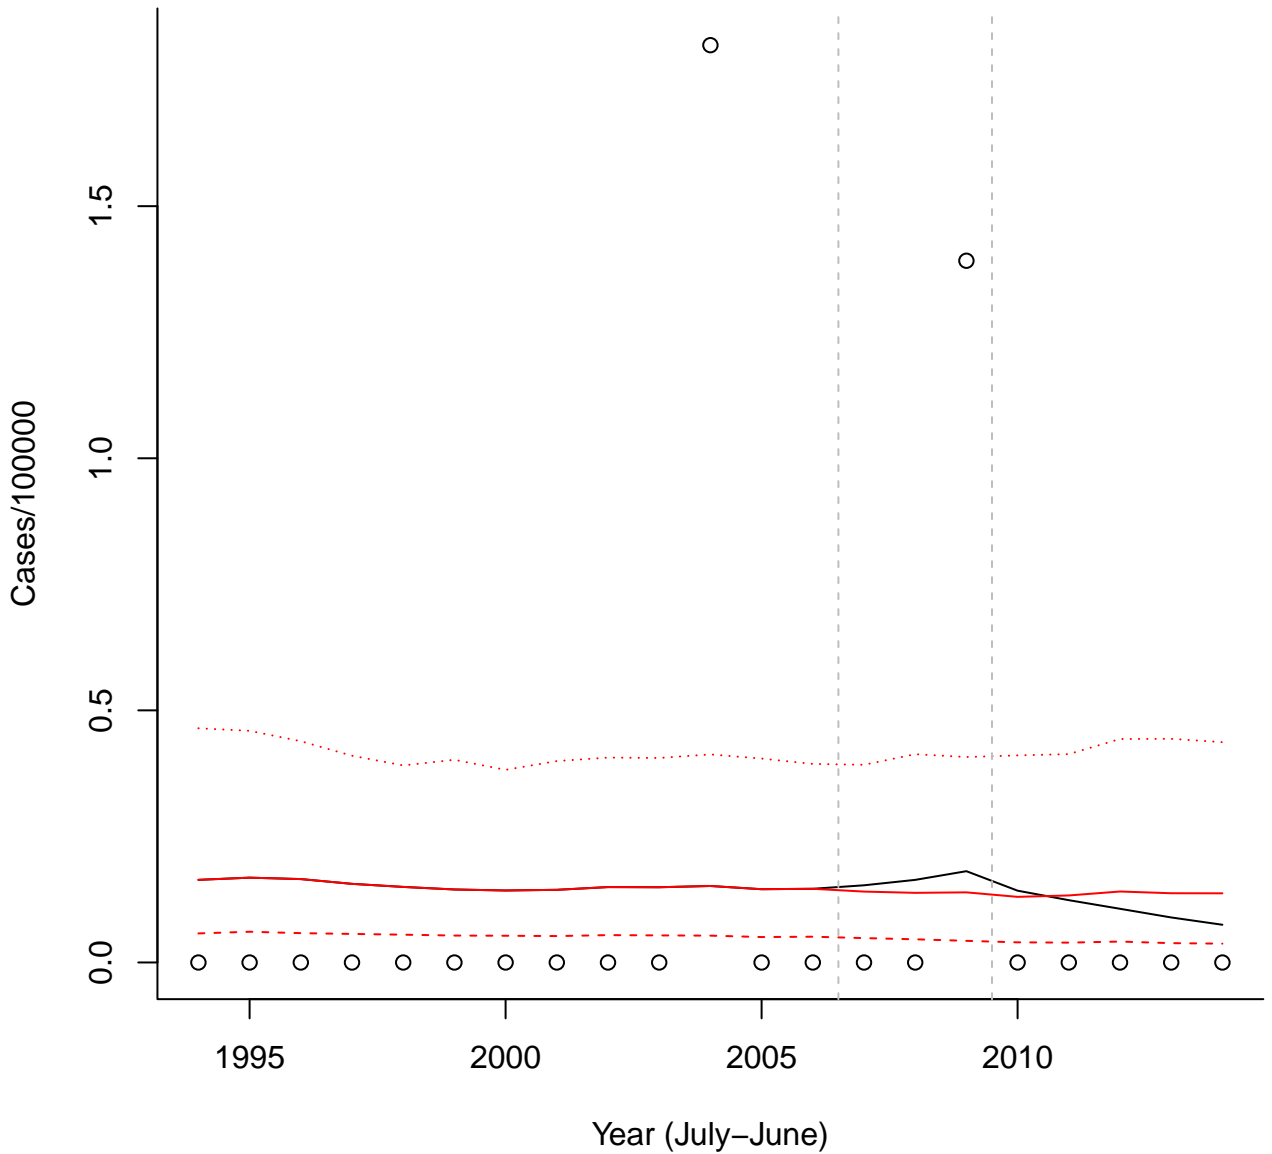

# 5-17y With comorbidity Serotype 12F

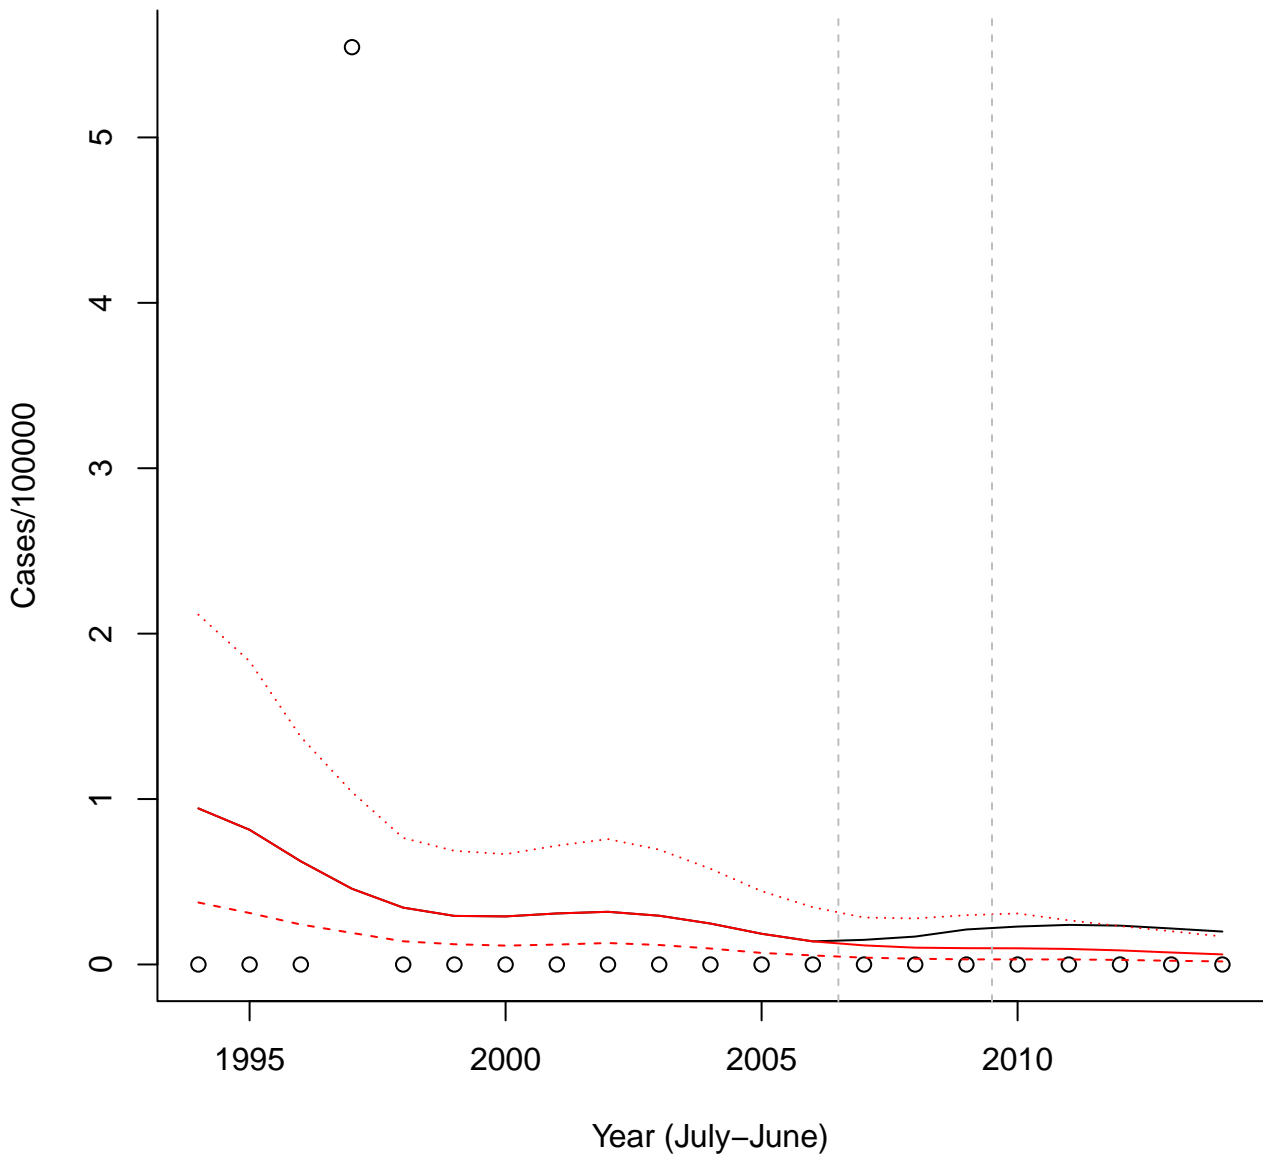

# 5-17y With comorbidity Serotype 14

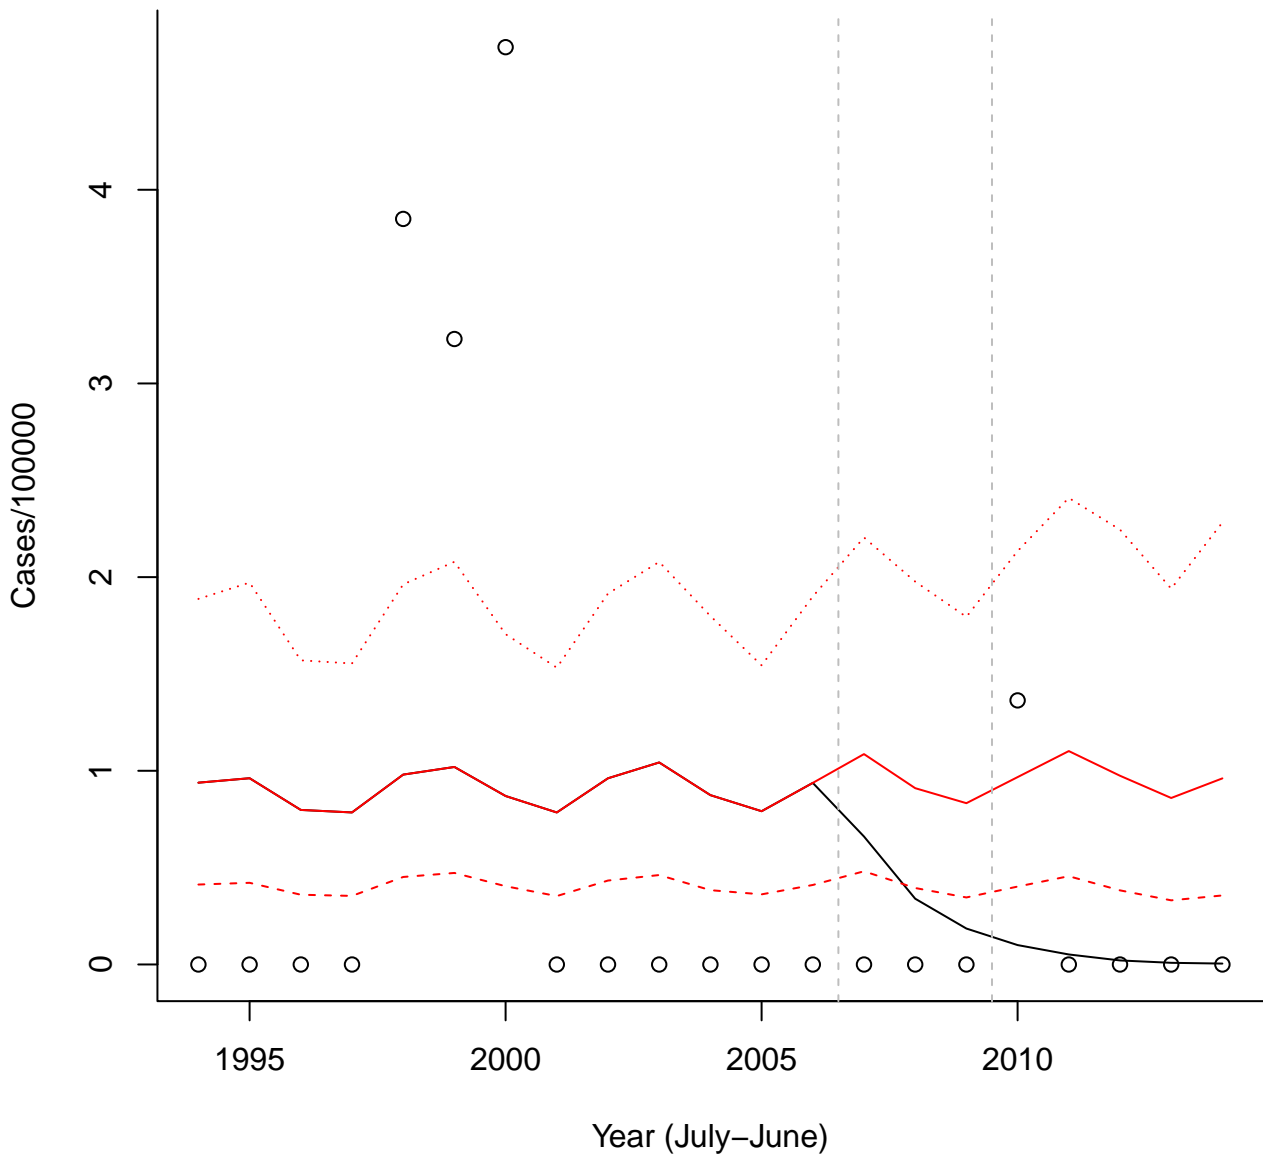



# 5-17y With comorbidity Serotype 15A

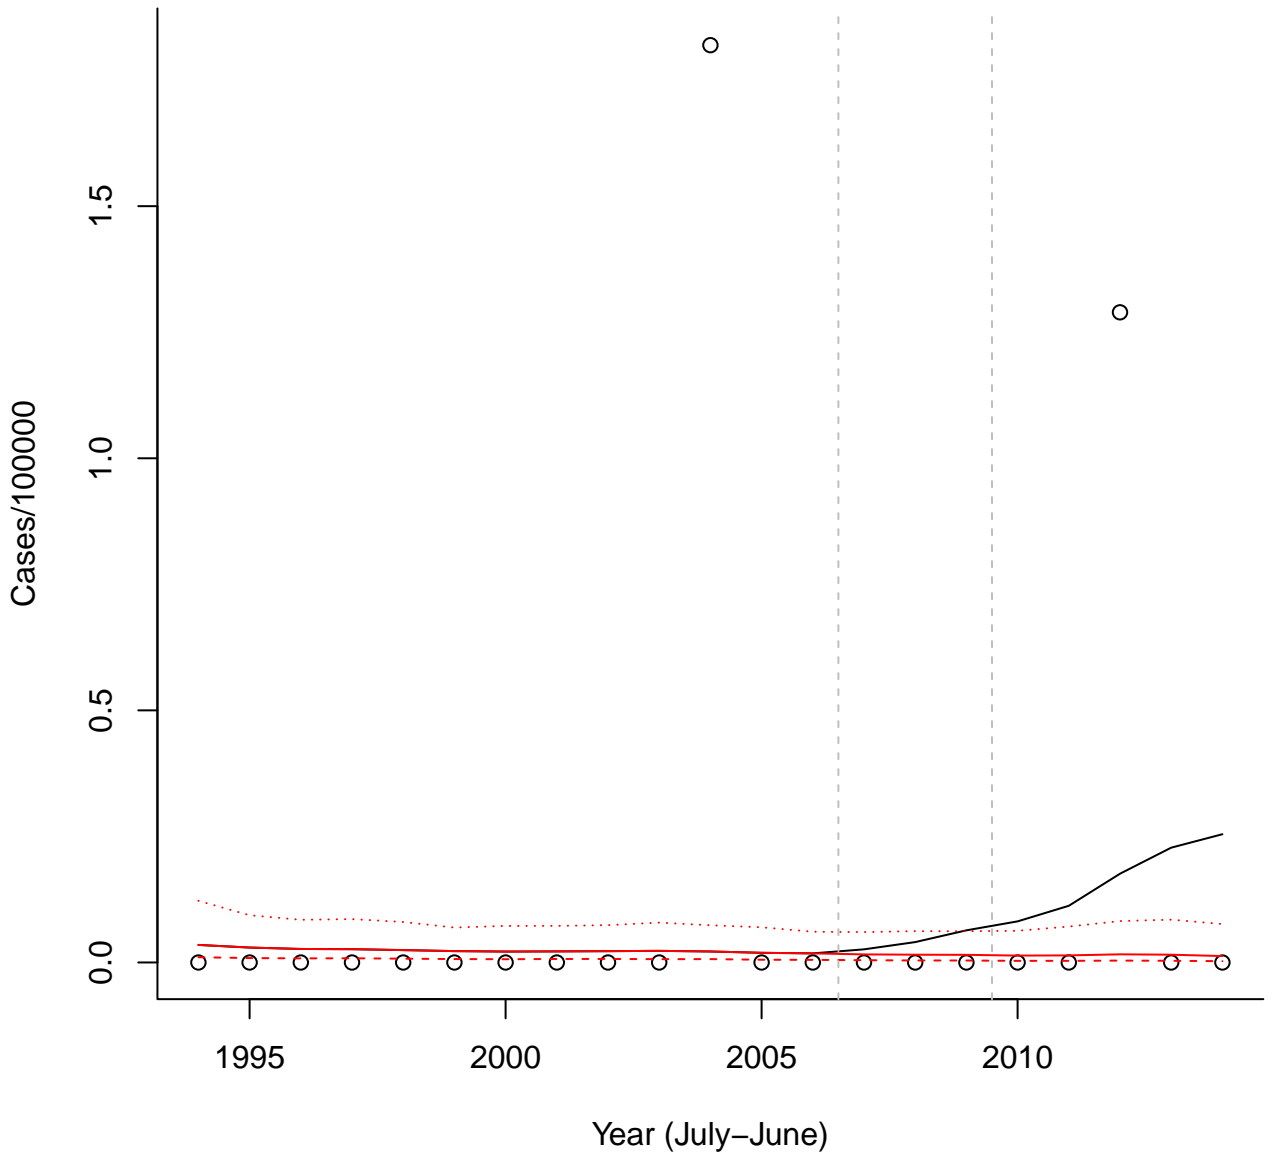

# 5-17y With comorbidity Serotype 16F

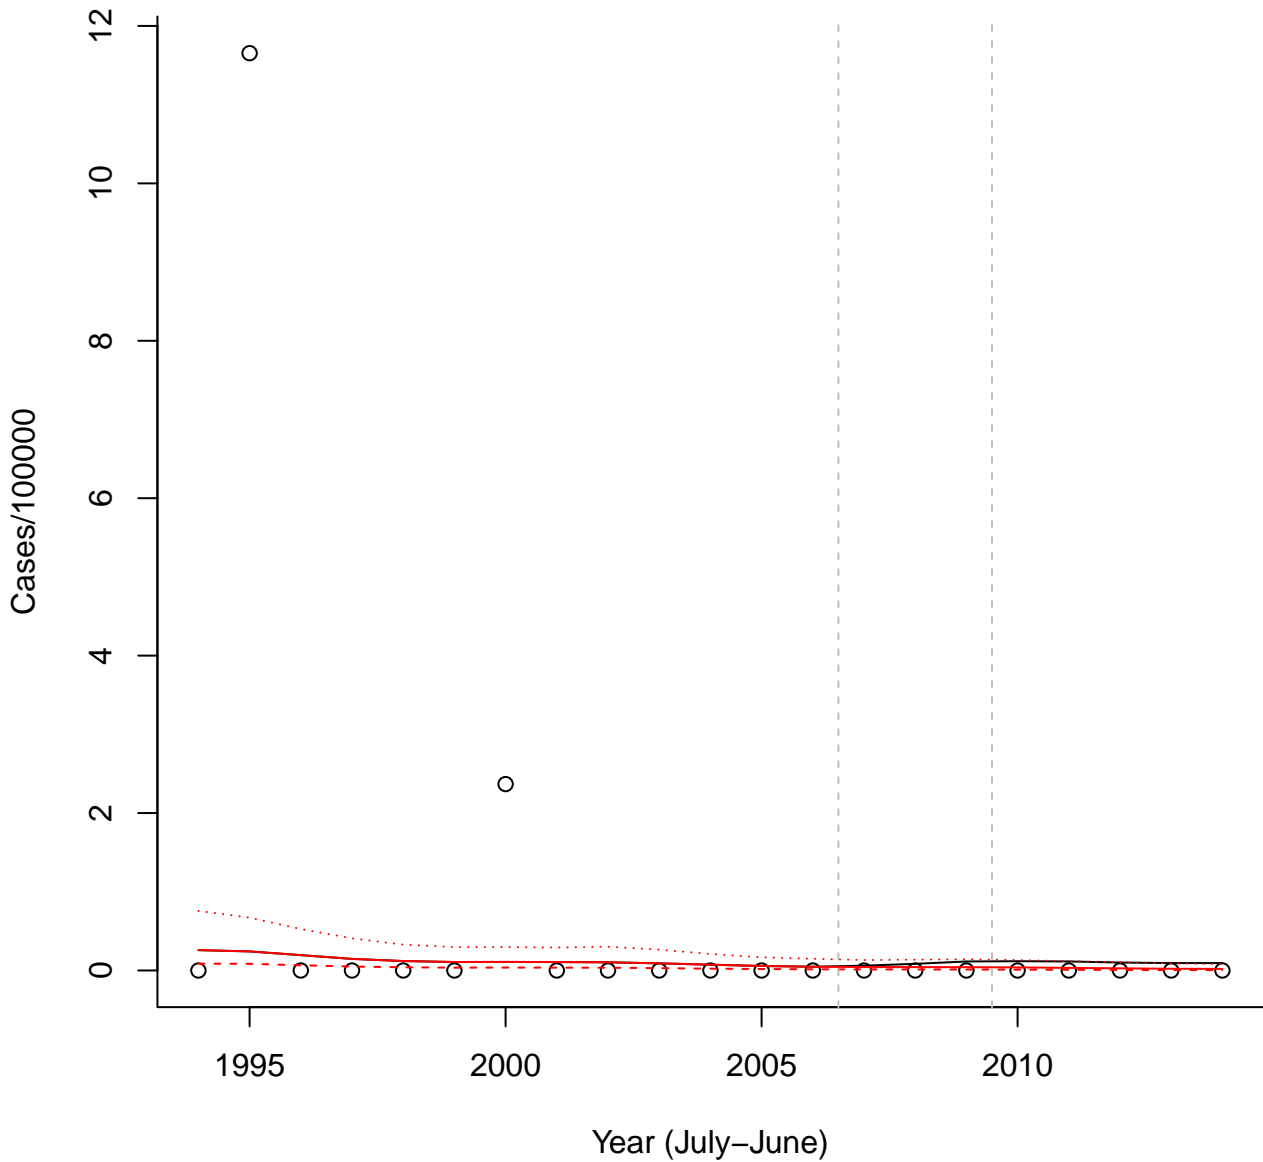

# 5-17y With comorbidity Serotype 17F

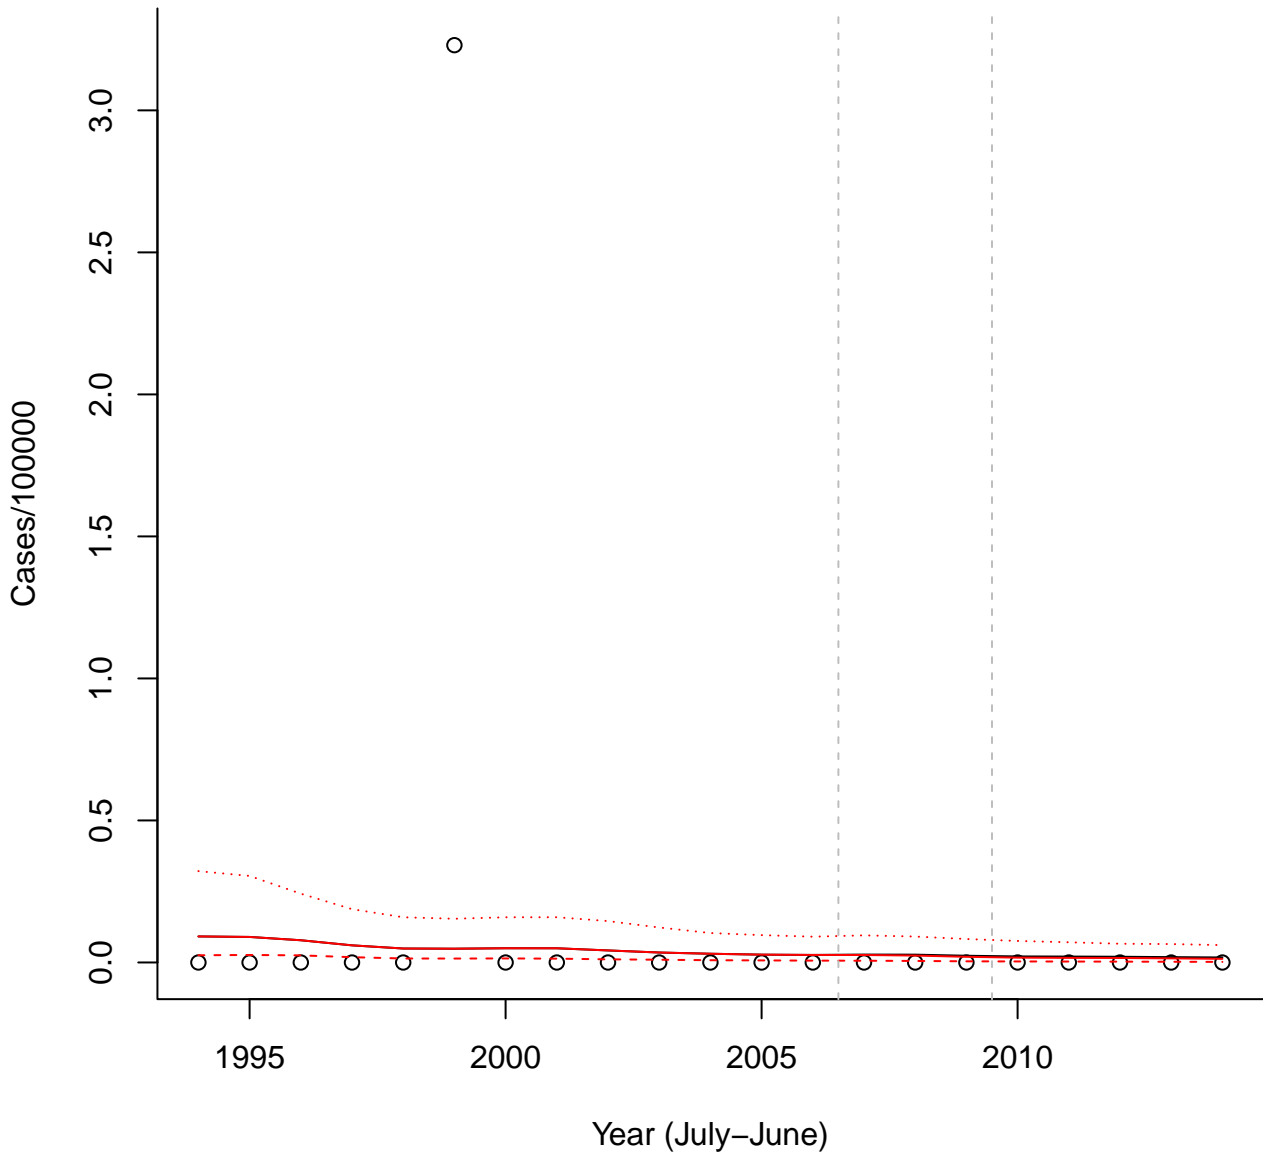

# 5-17y With comorbidity Serotype 18C

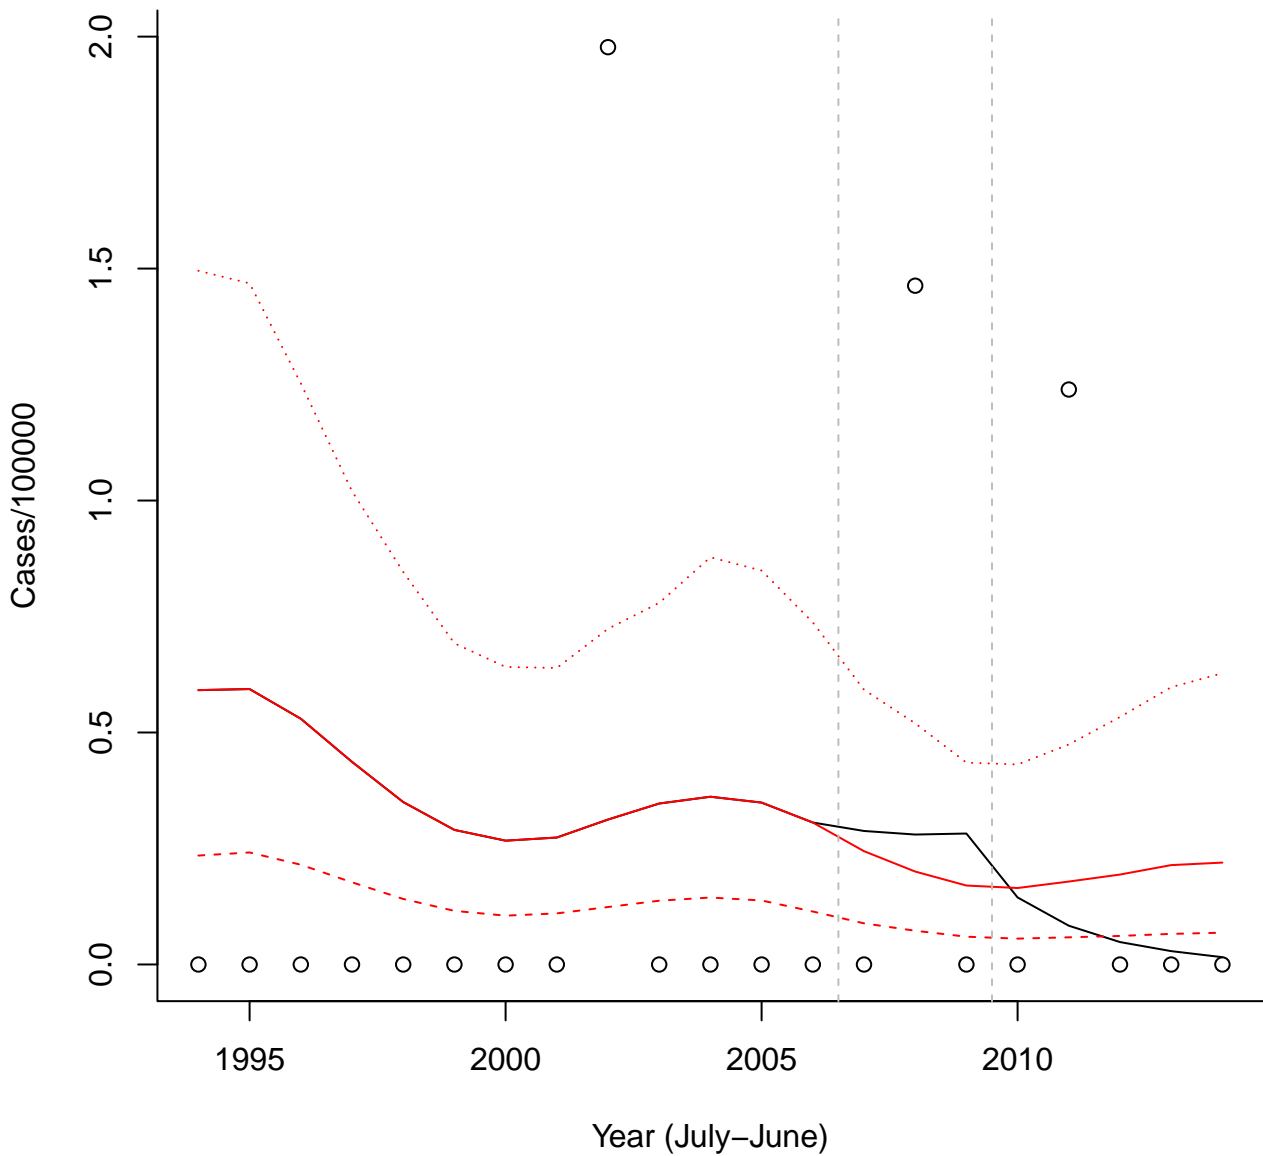

# 5-17y With comorbidity Serotype 18F

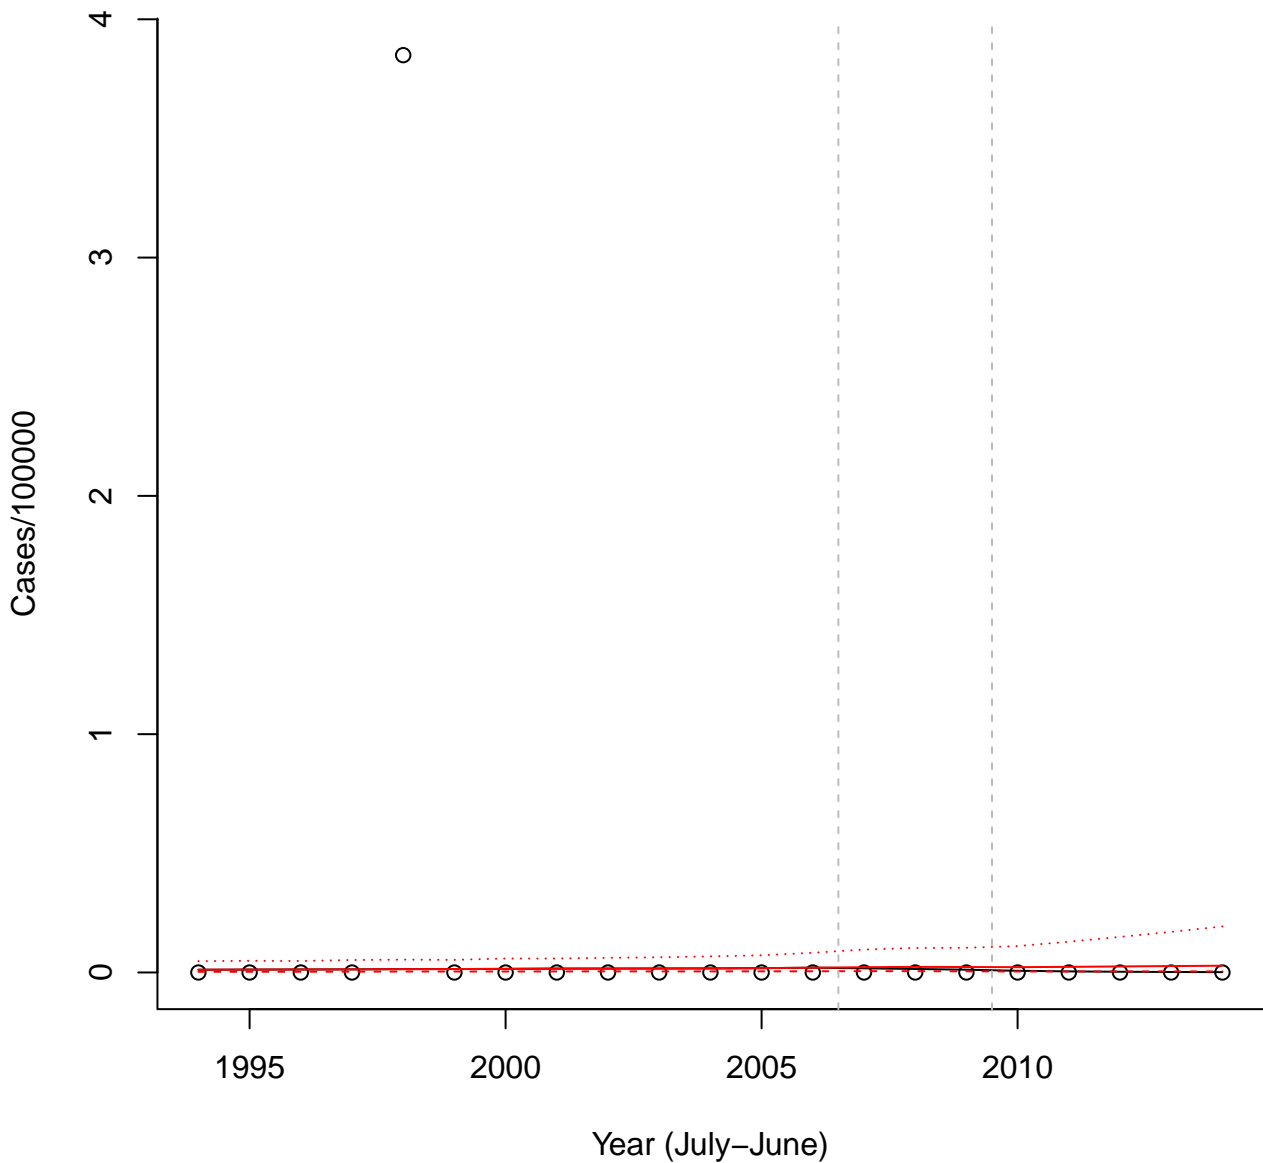

# 5-17y With comorbidity Serotype 19A

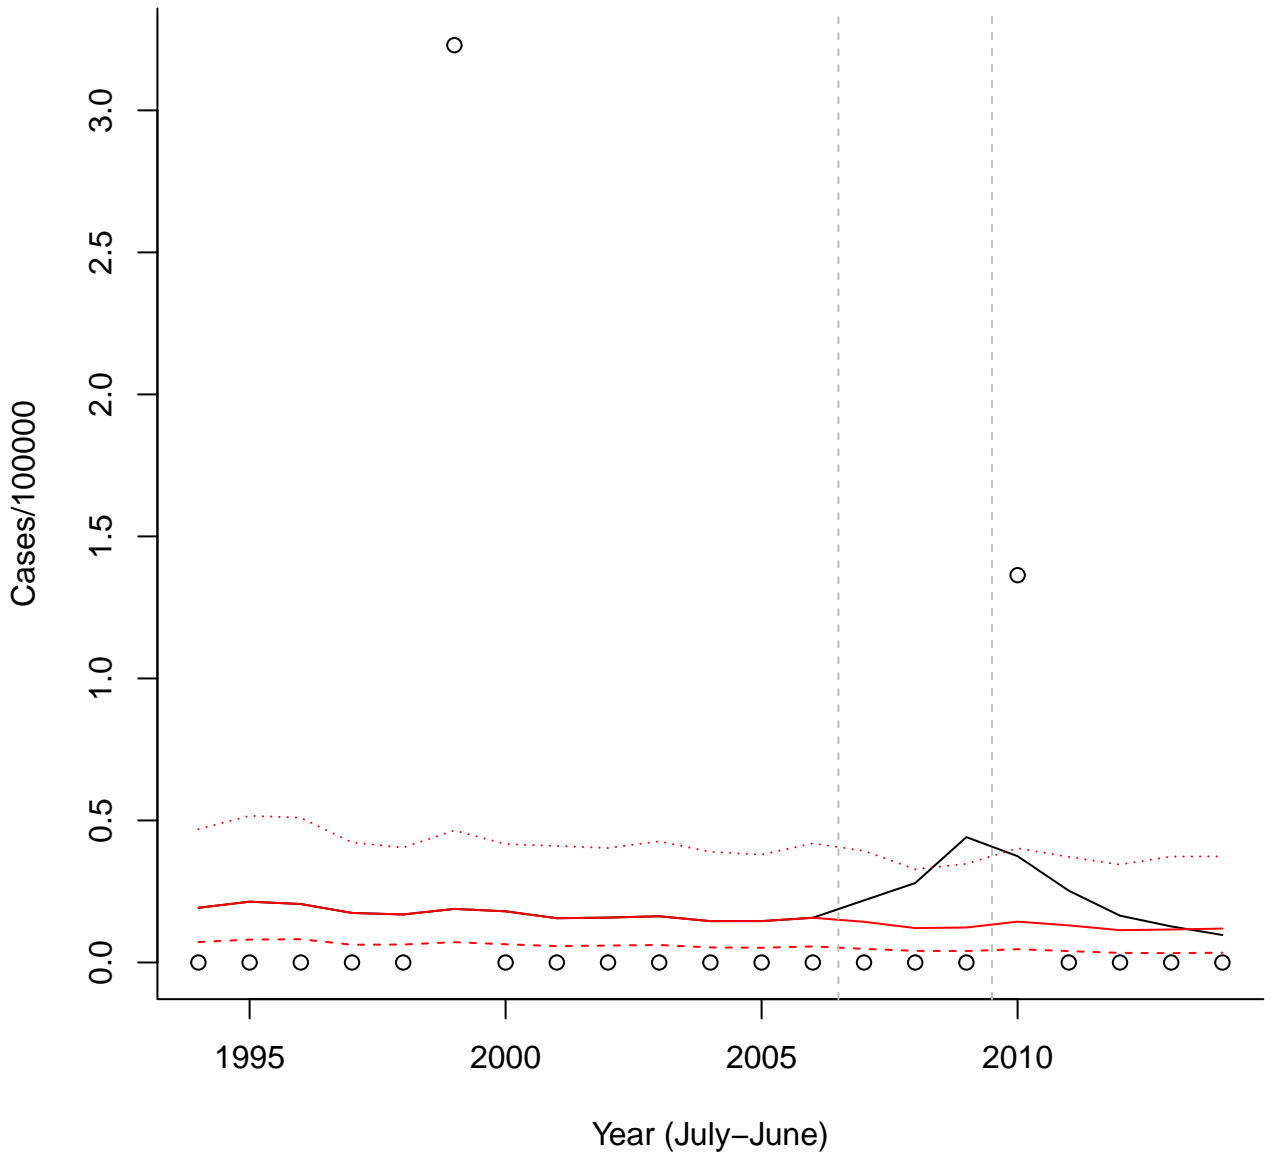

# 5-17y With comorbidity Serotype 19C

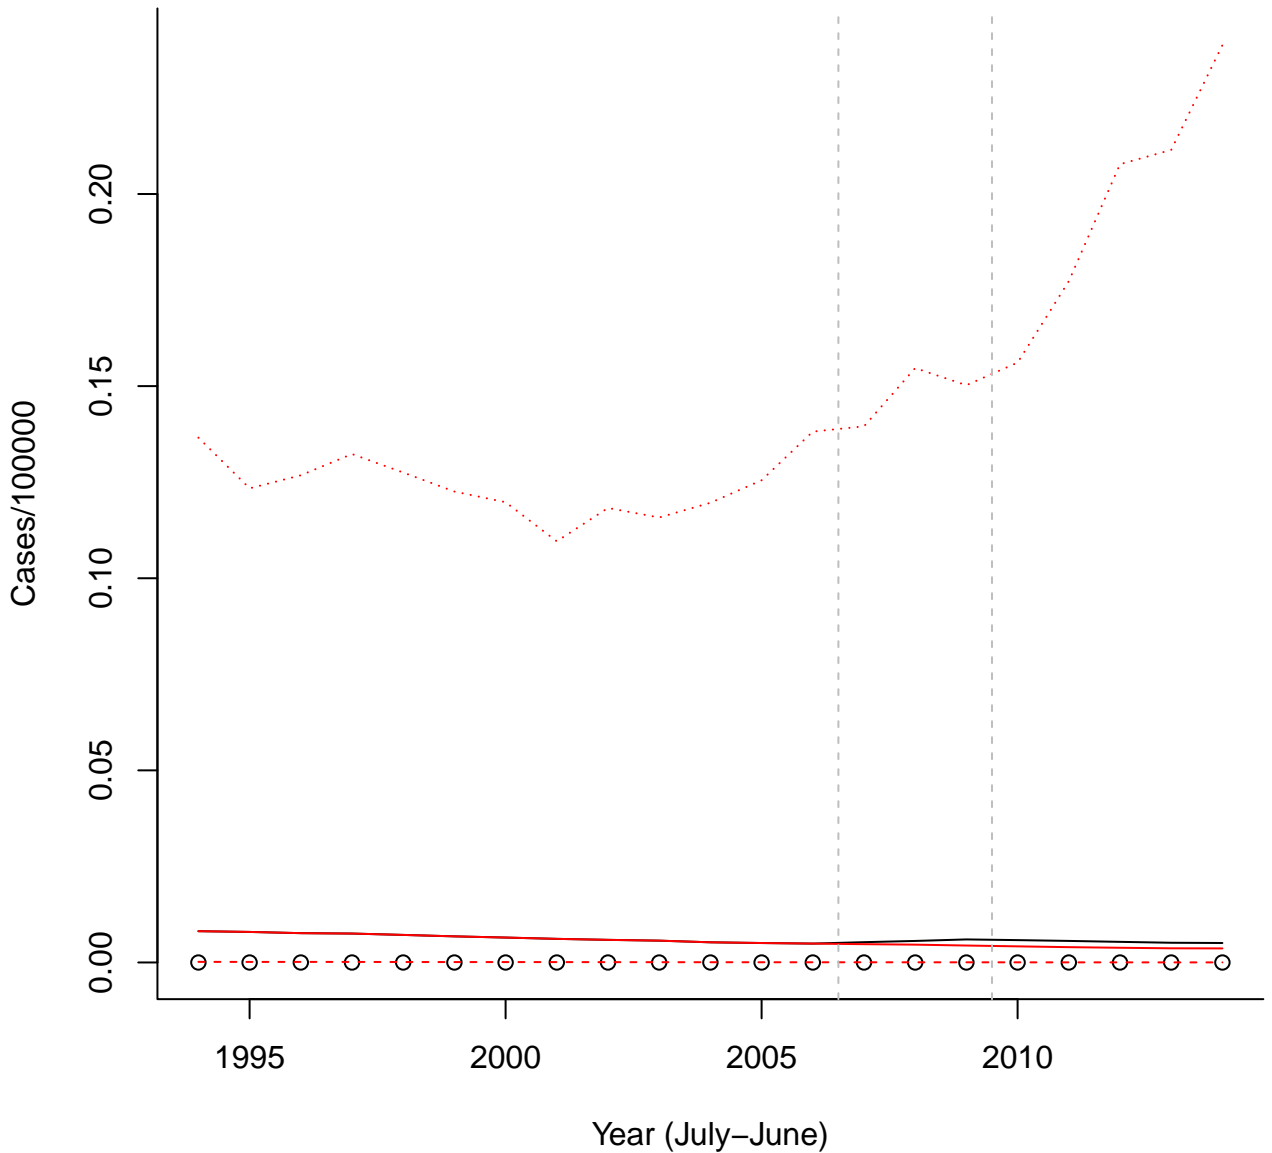

# 5-17y With comorbidity Serotype 19F

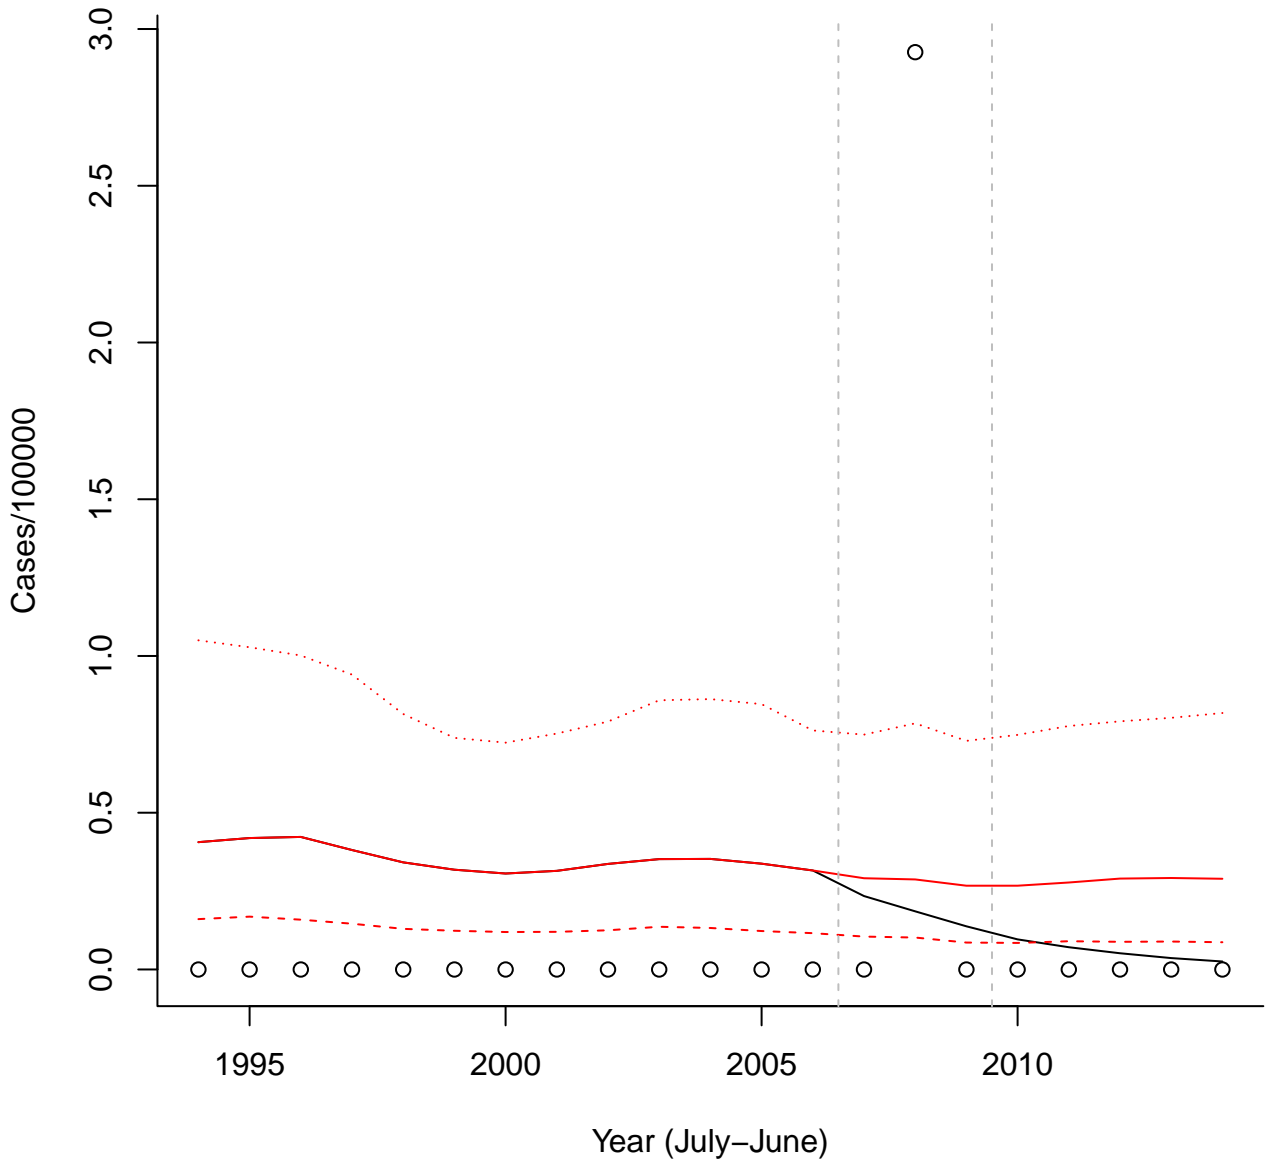



# 5-17y With comorbidity Serotype 22F

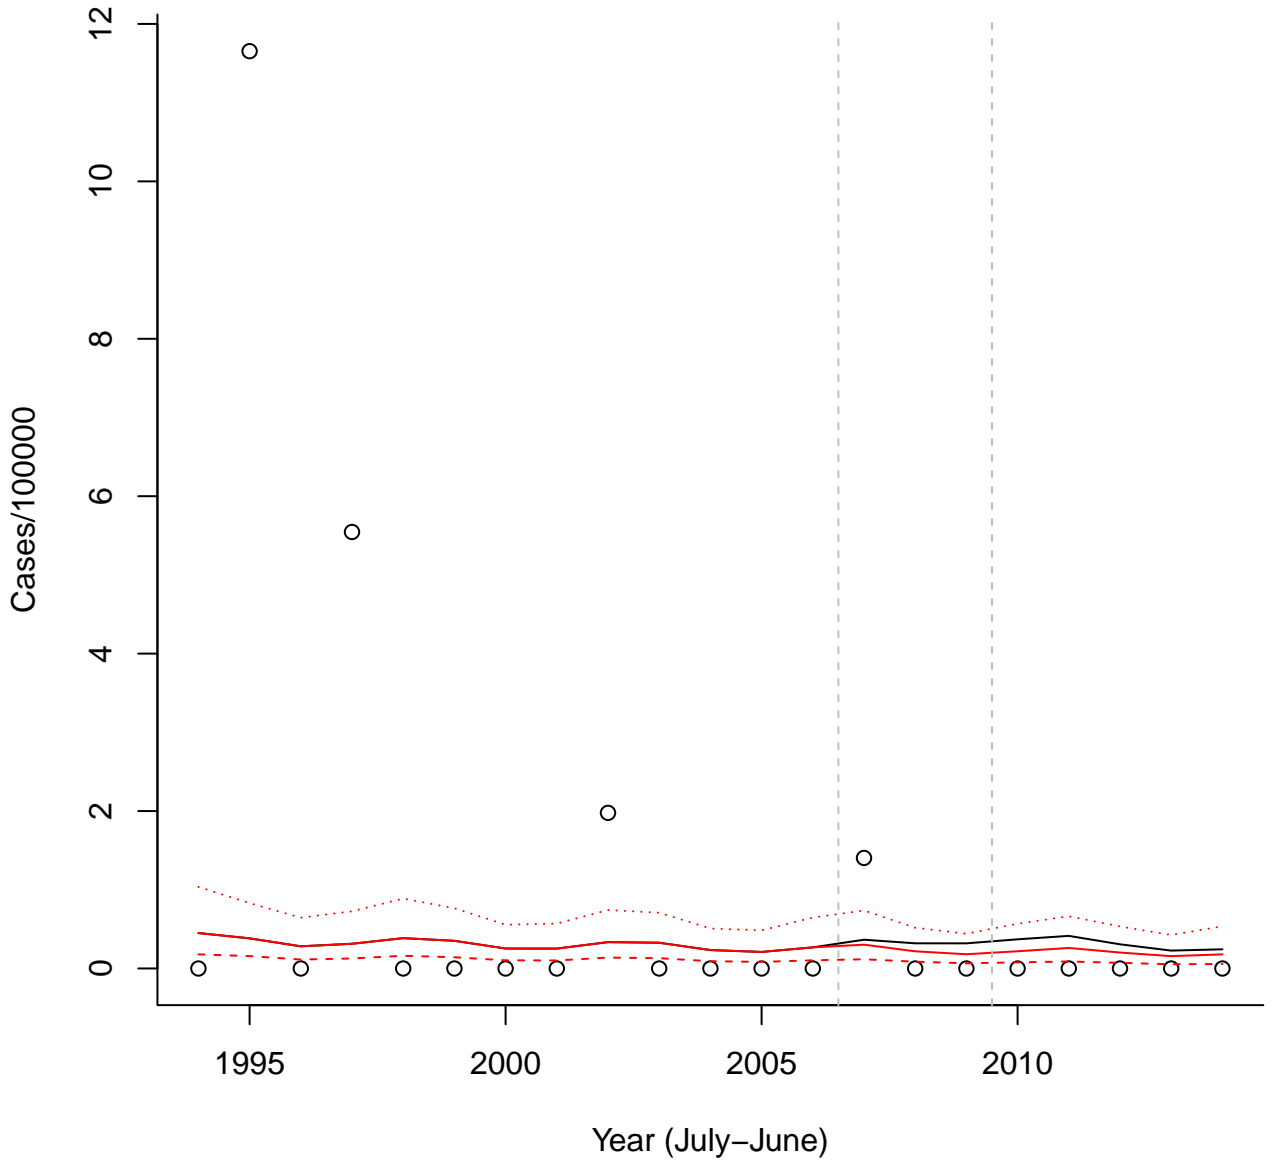

# 5-17y With comorbidity Serotype 23A

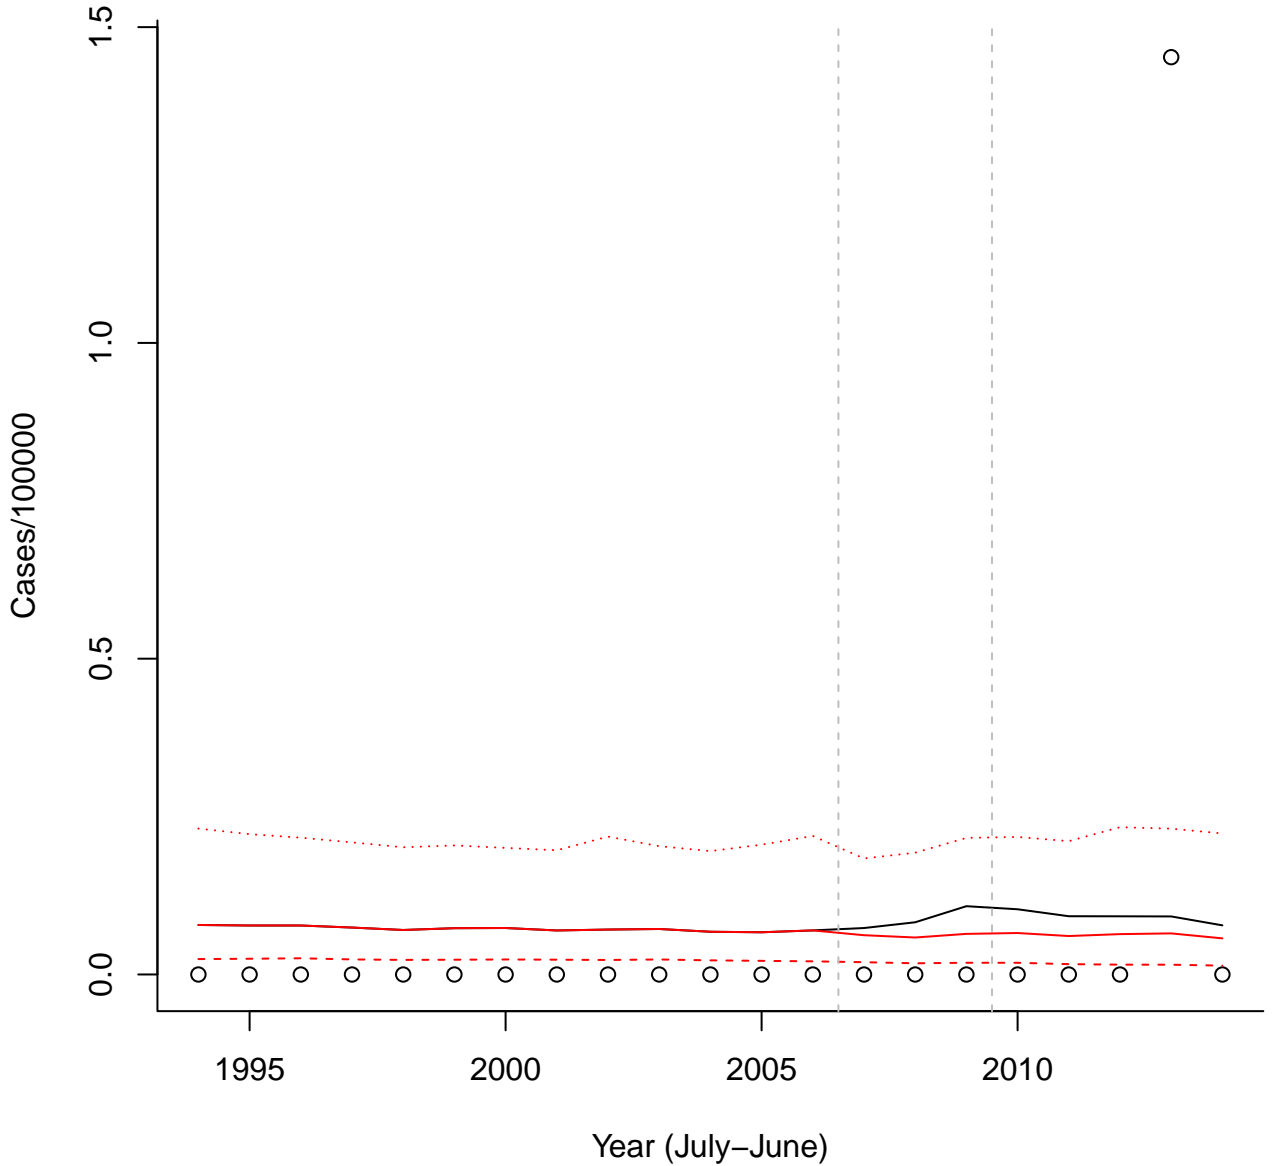

# 5-17y With comorbidity Serotype 23B

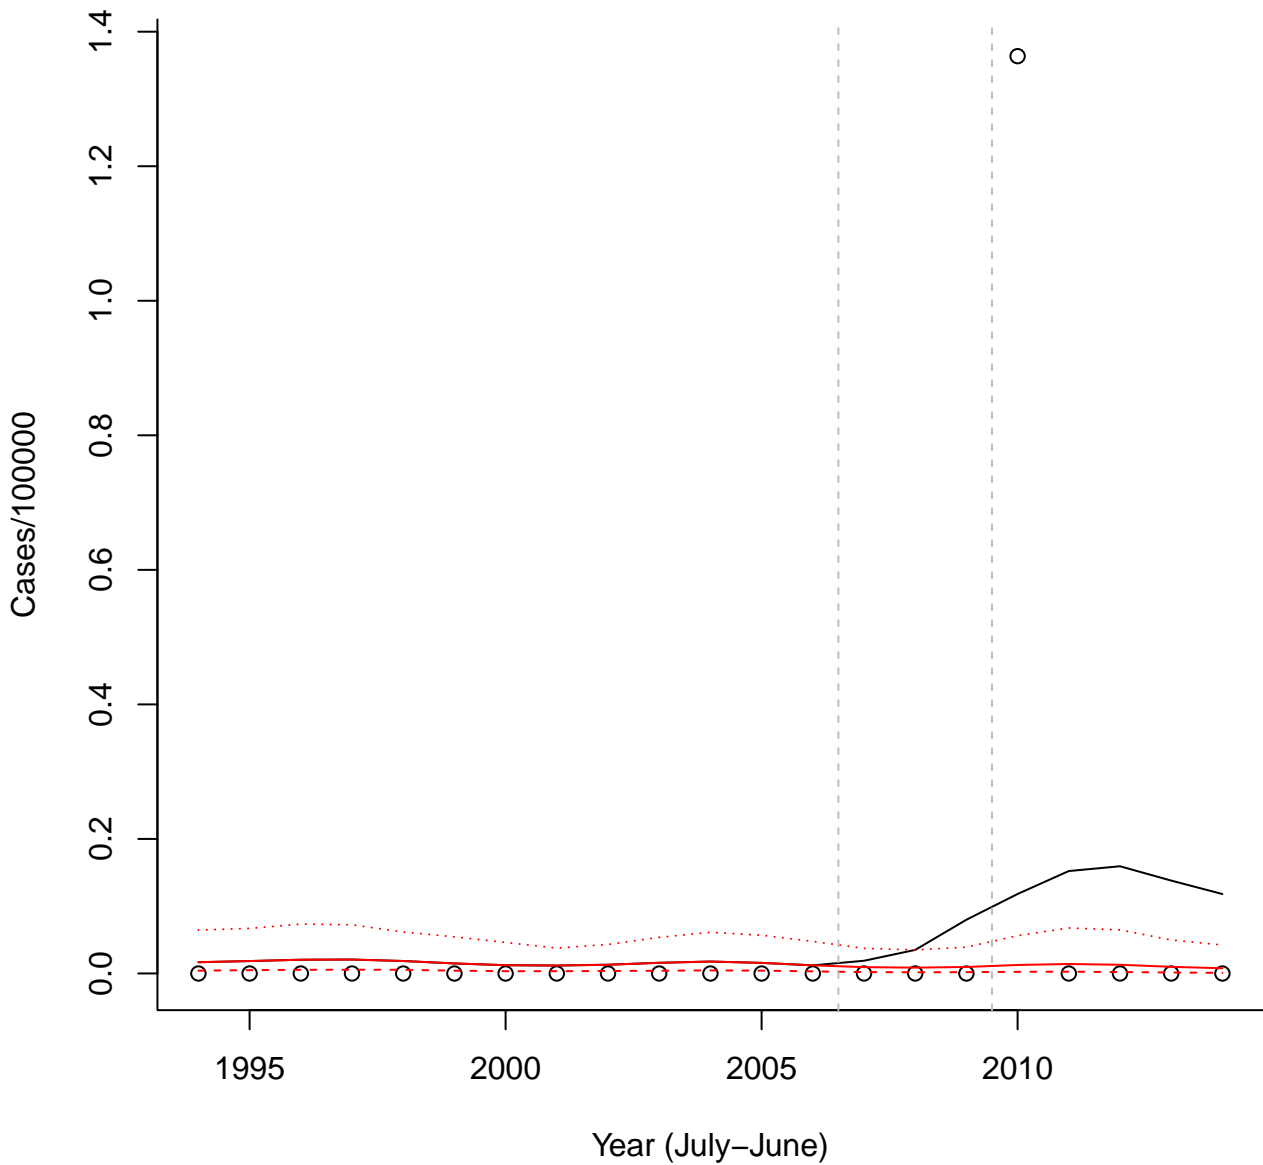

# 5-17y With comorbidity Serotype 23F

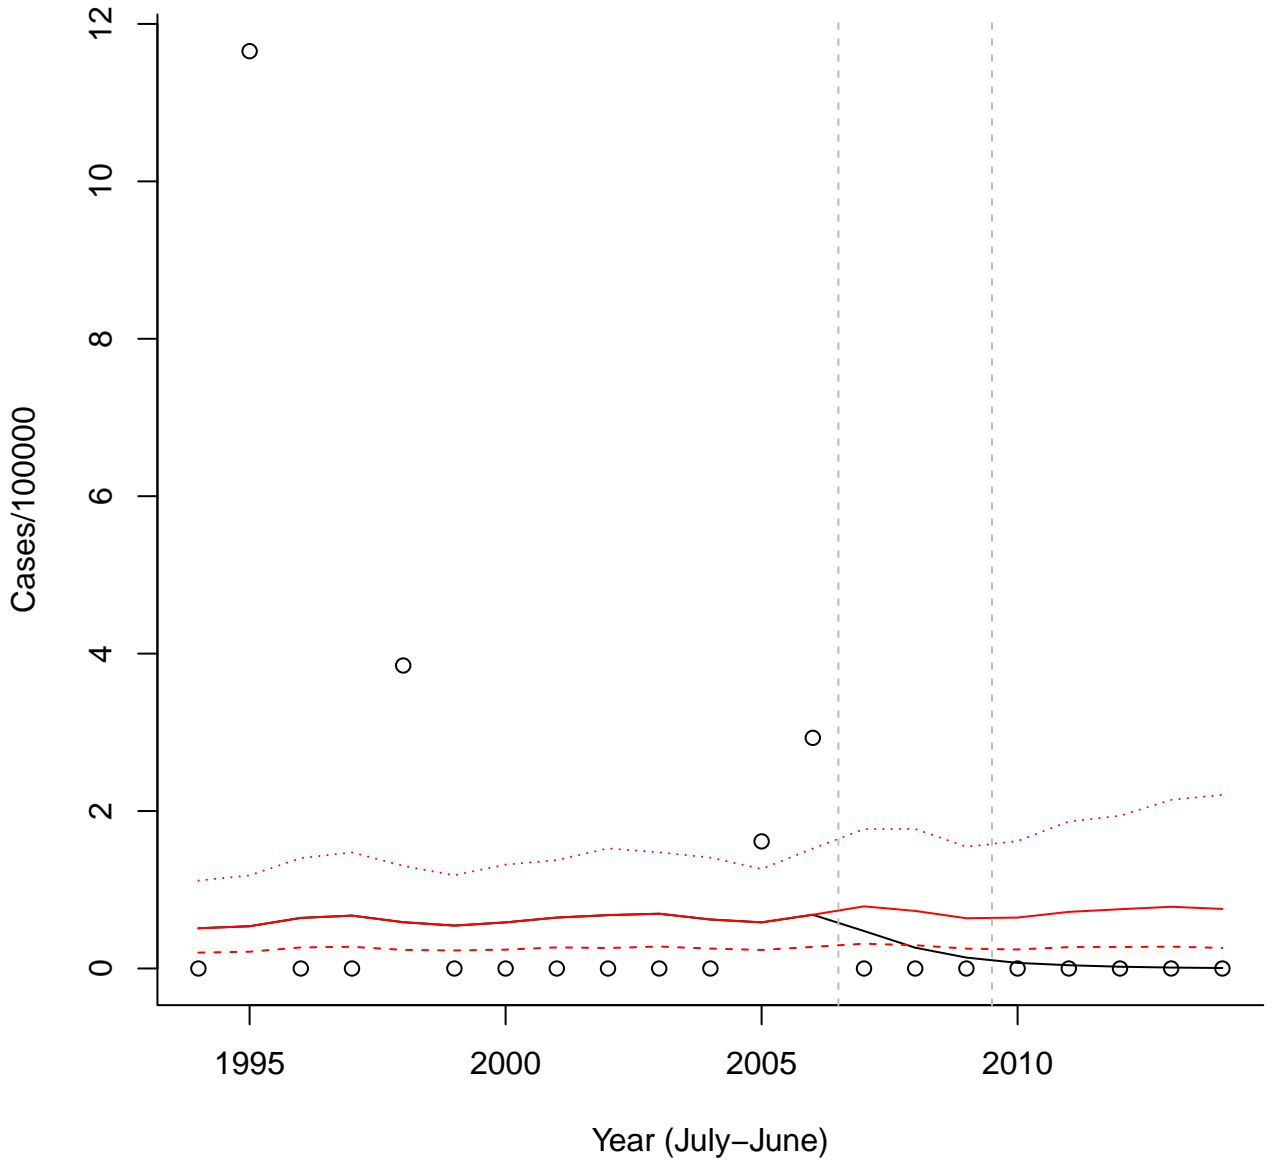

# 5-17y With comorbidity Serotype 24F

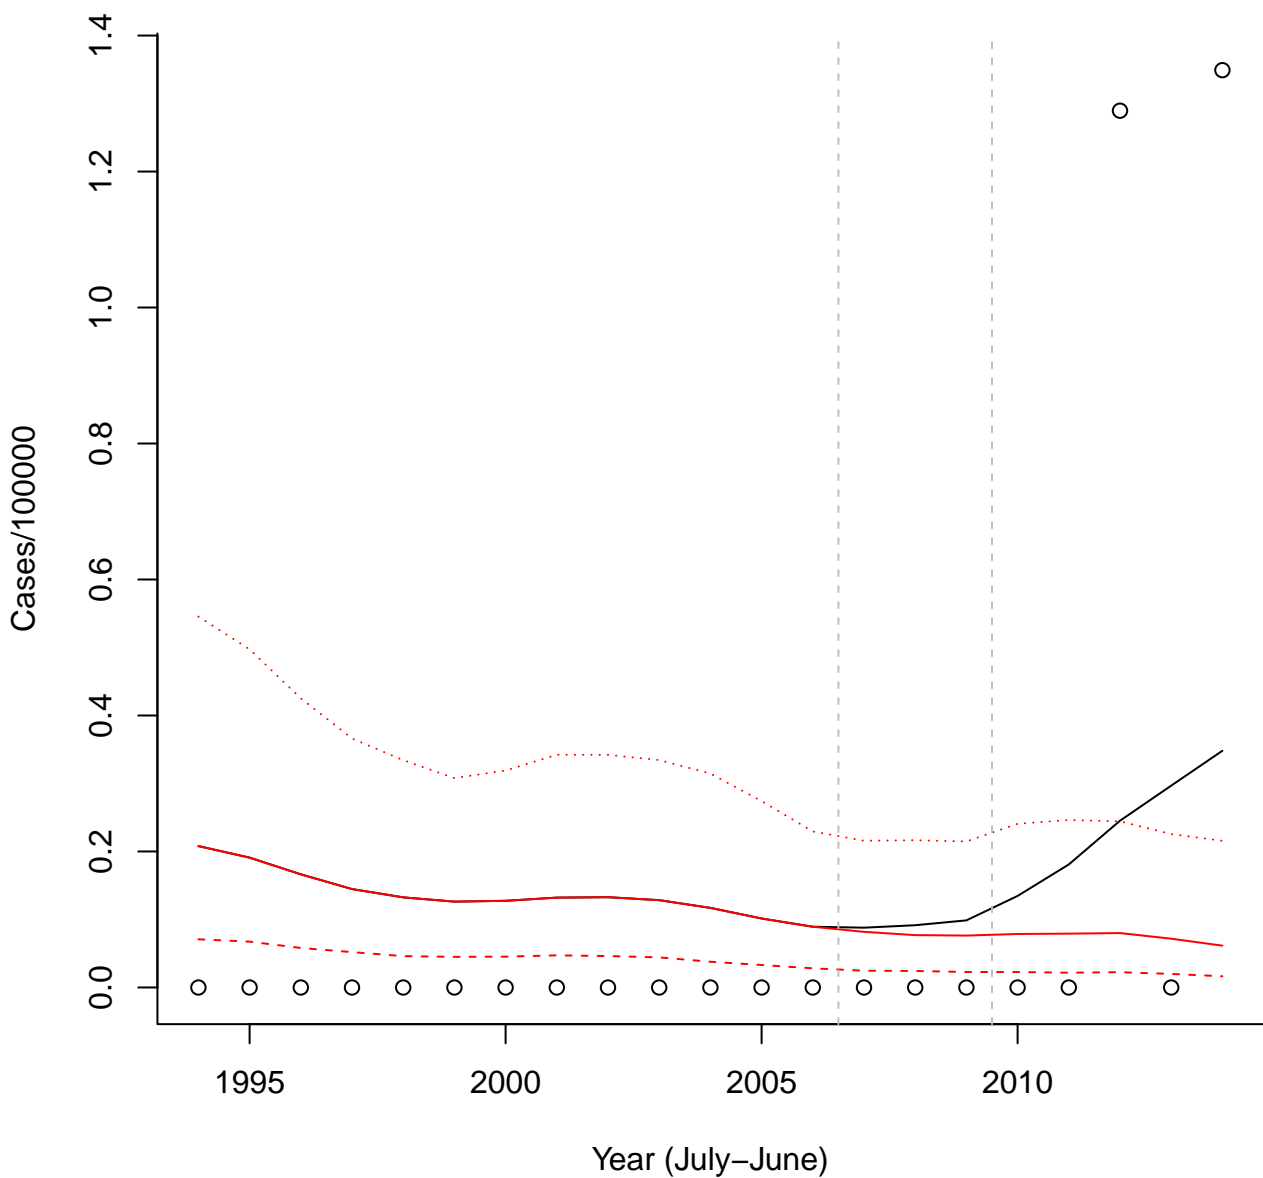

### 5-17y With comorbidity Serotype 3

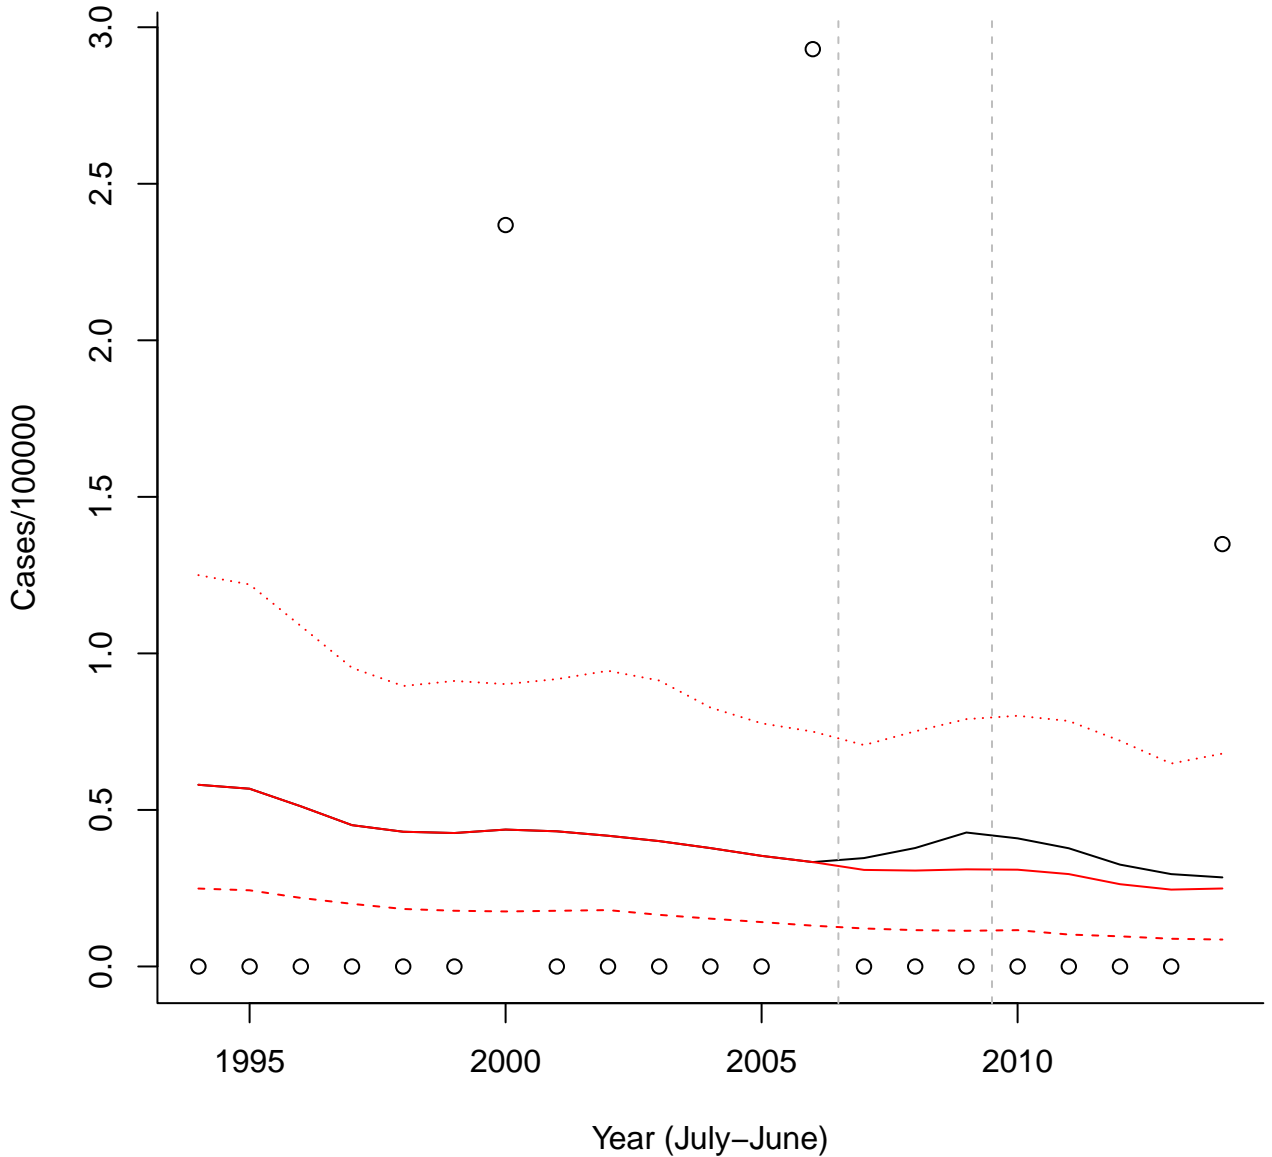

# 5-17y With comorbidity Serotype 33F

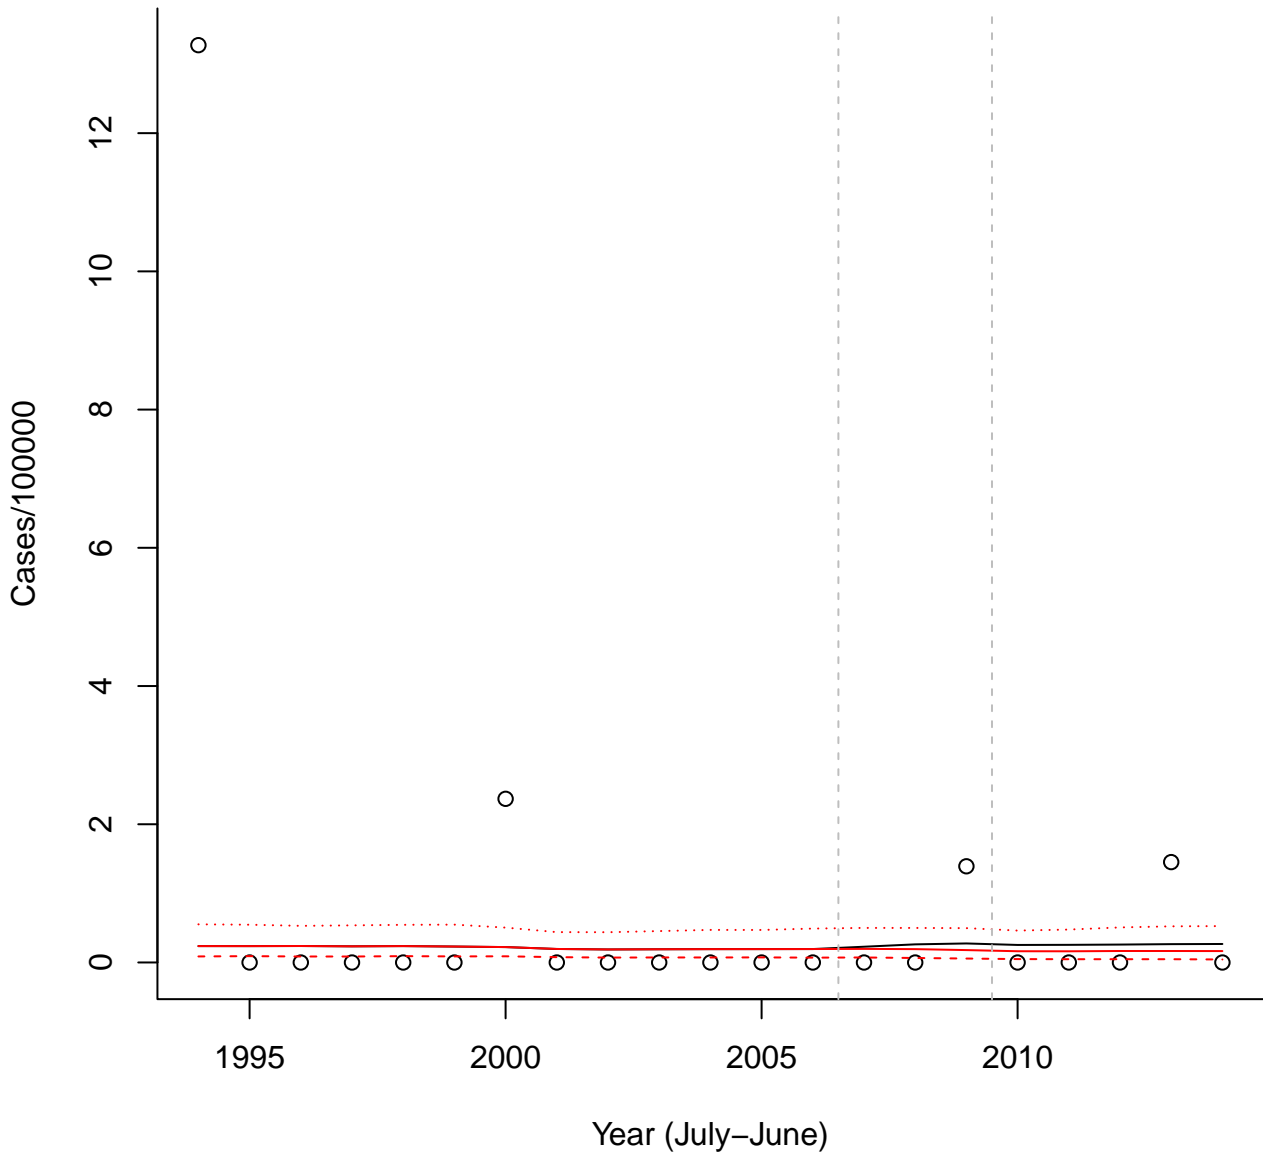

# 5-17y With comorbidity Serotype 4

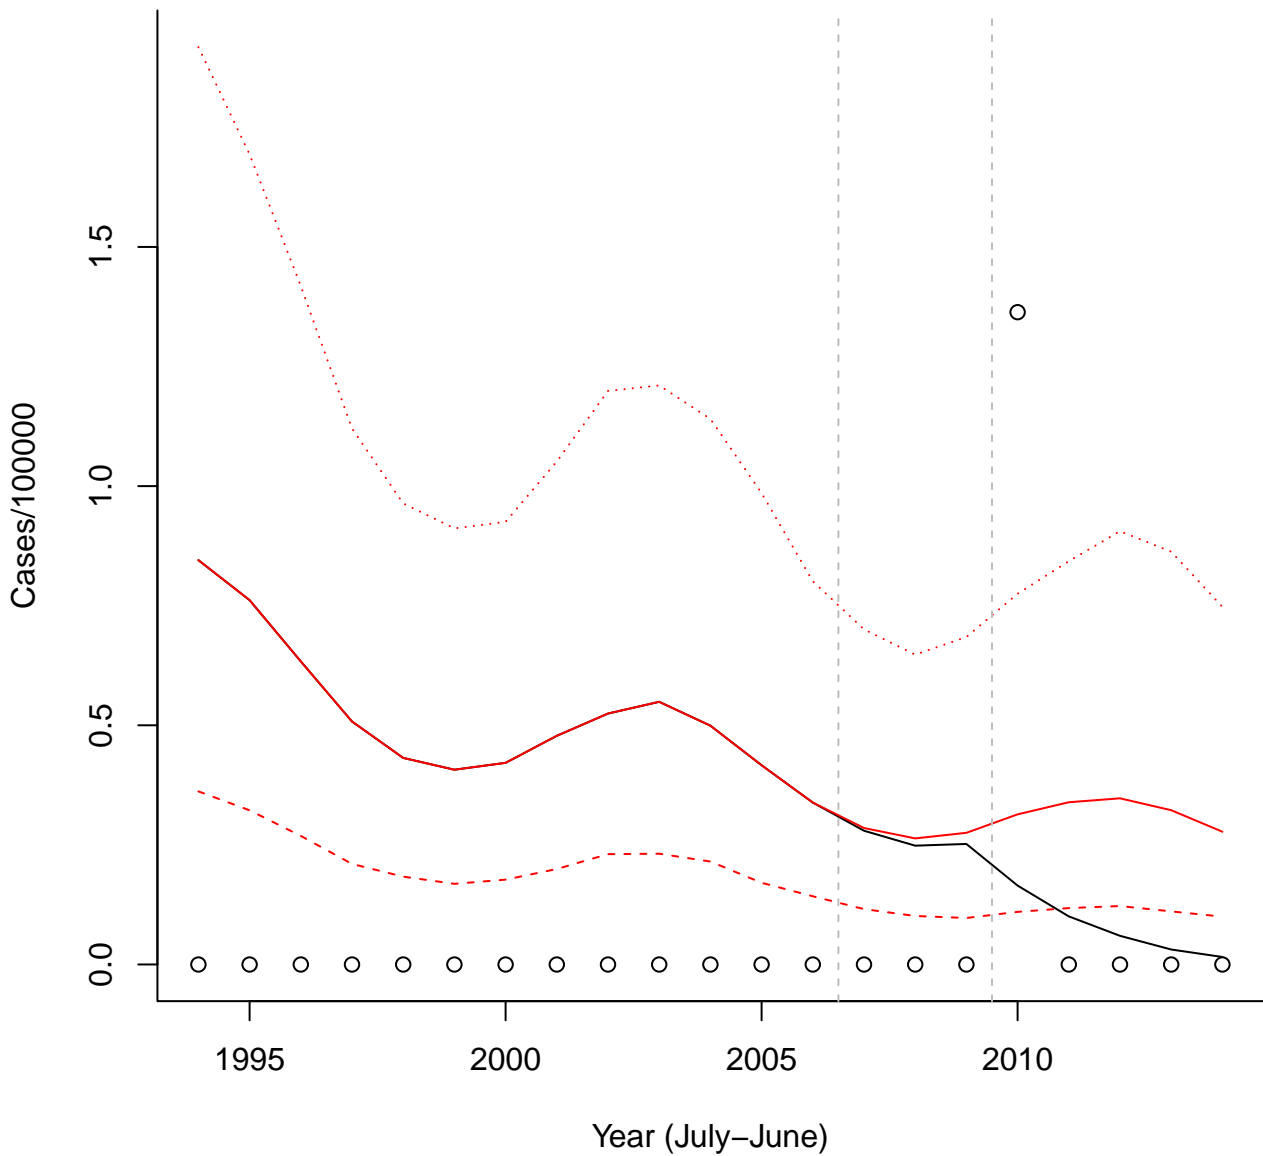



# 5-17y With comorbidity Serotype 5

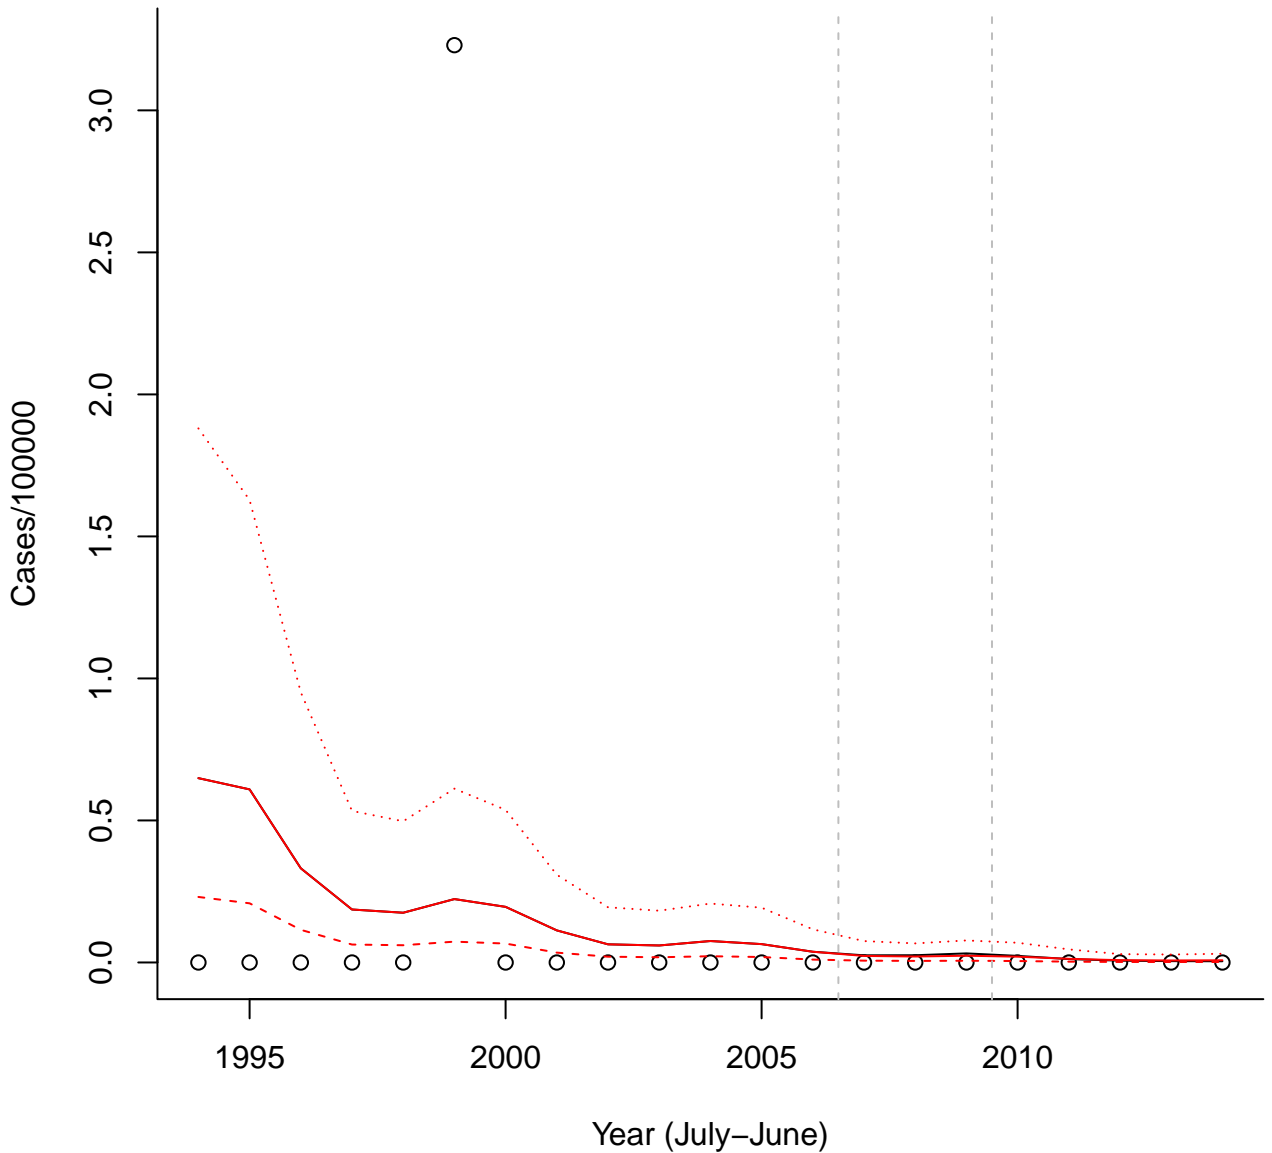

# 5-17y With comorbidity Serotype 6A

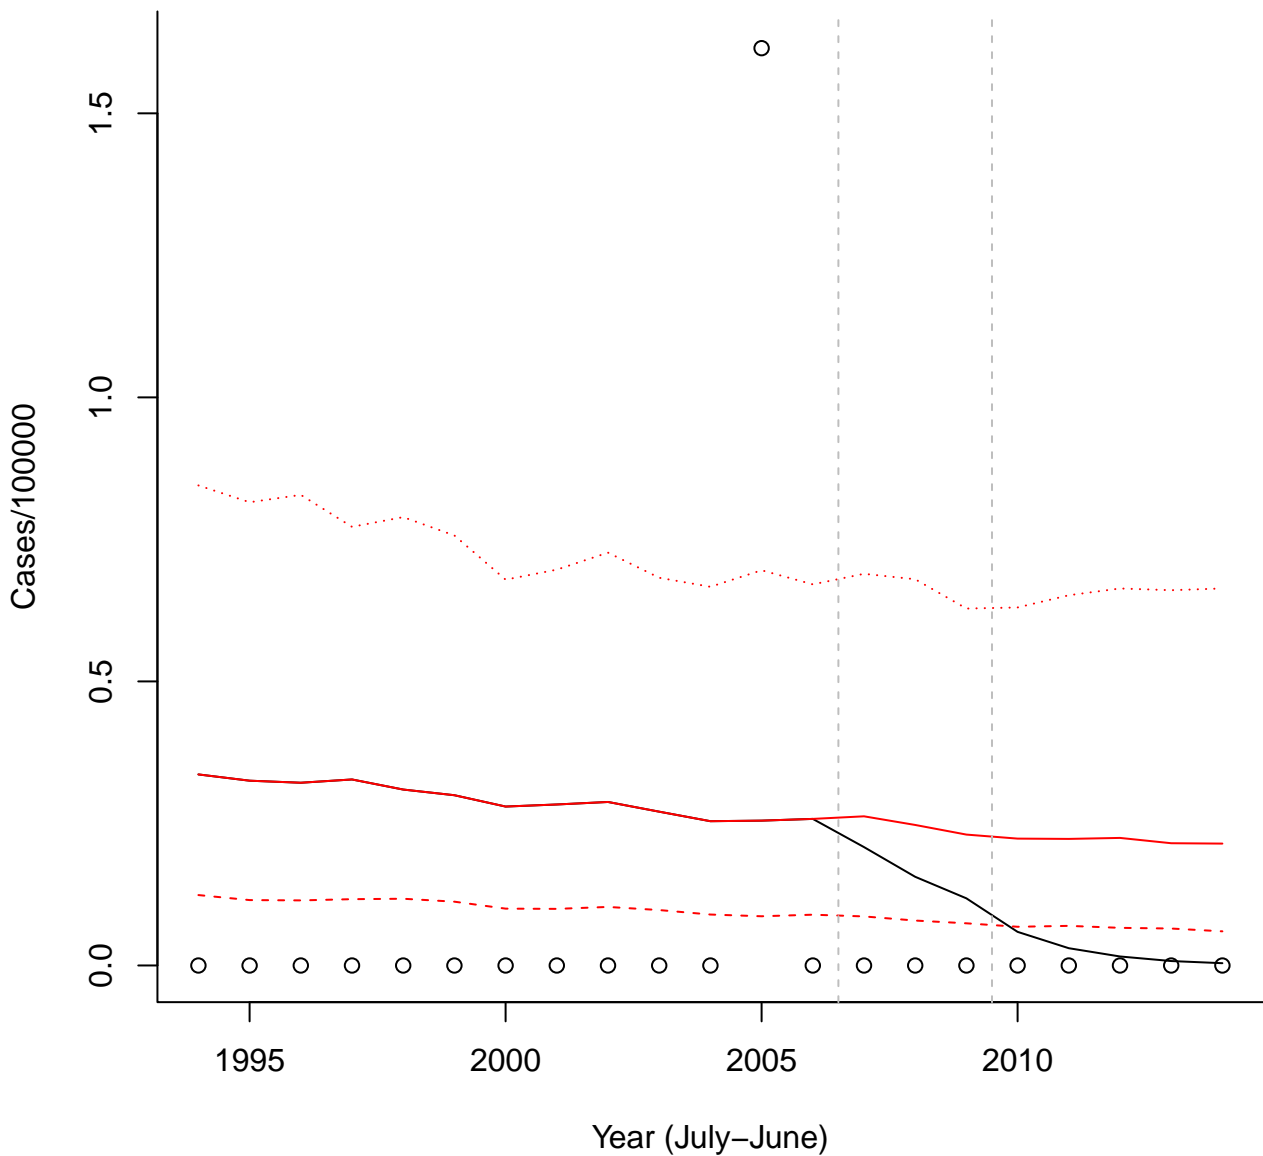

# 5-17y With comorbidity Serotype 6B

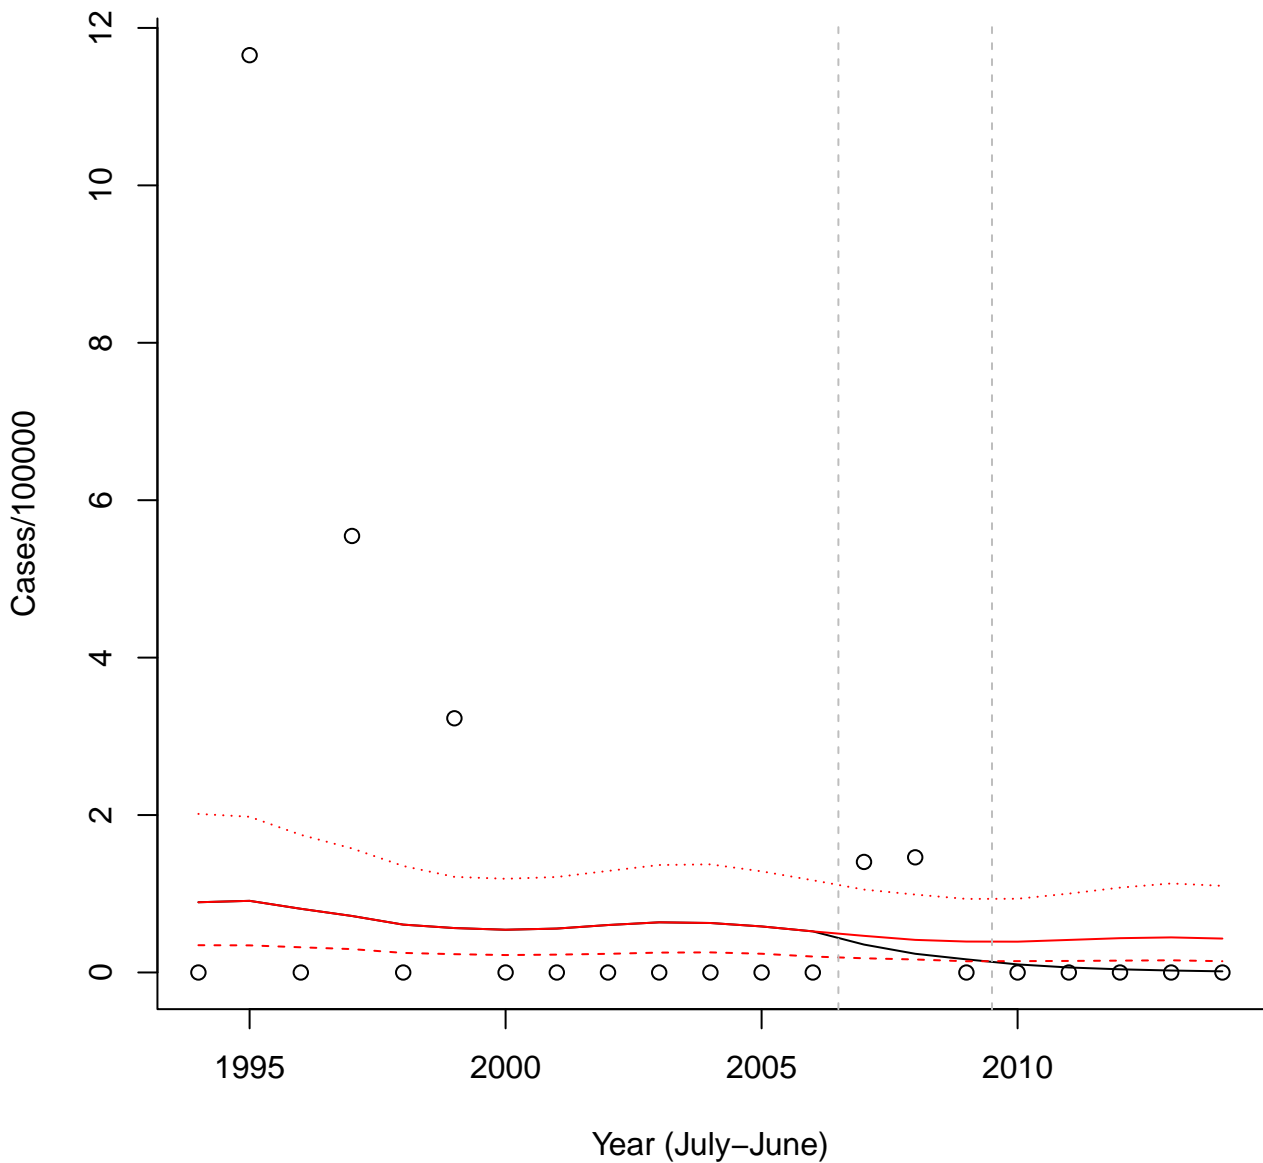

# 5-17y With comorbidity Serotype 6C

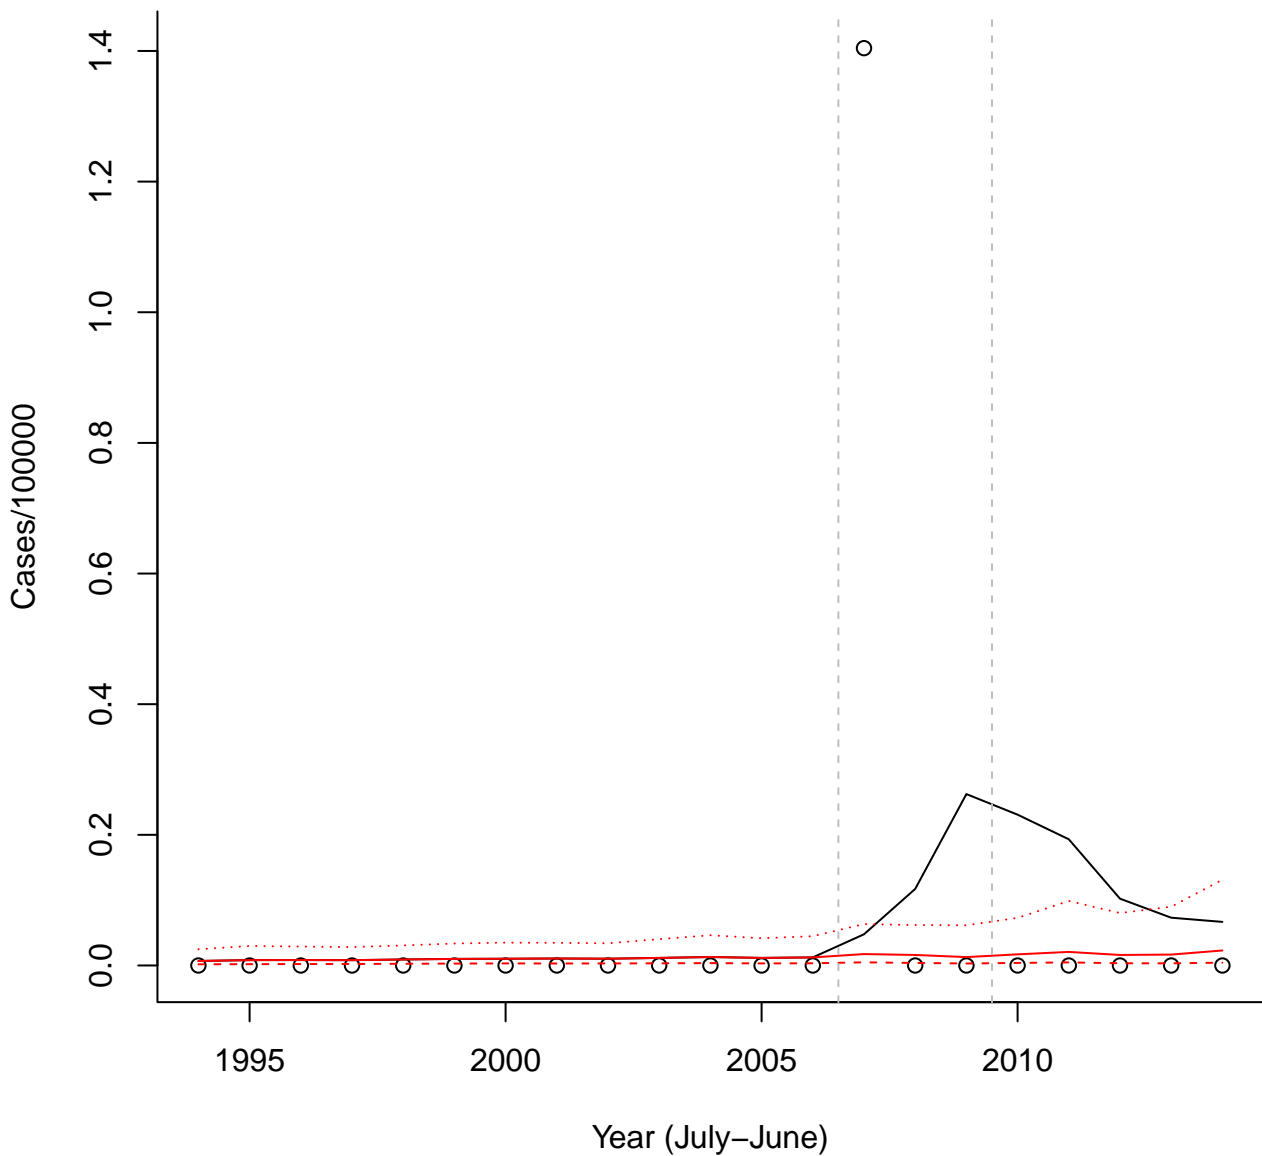

# 5-17y With comorbidity Serotype 7F

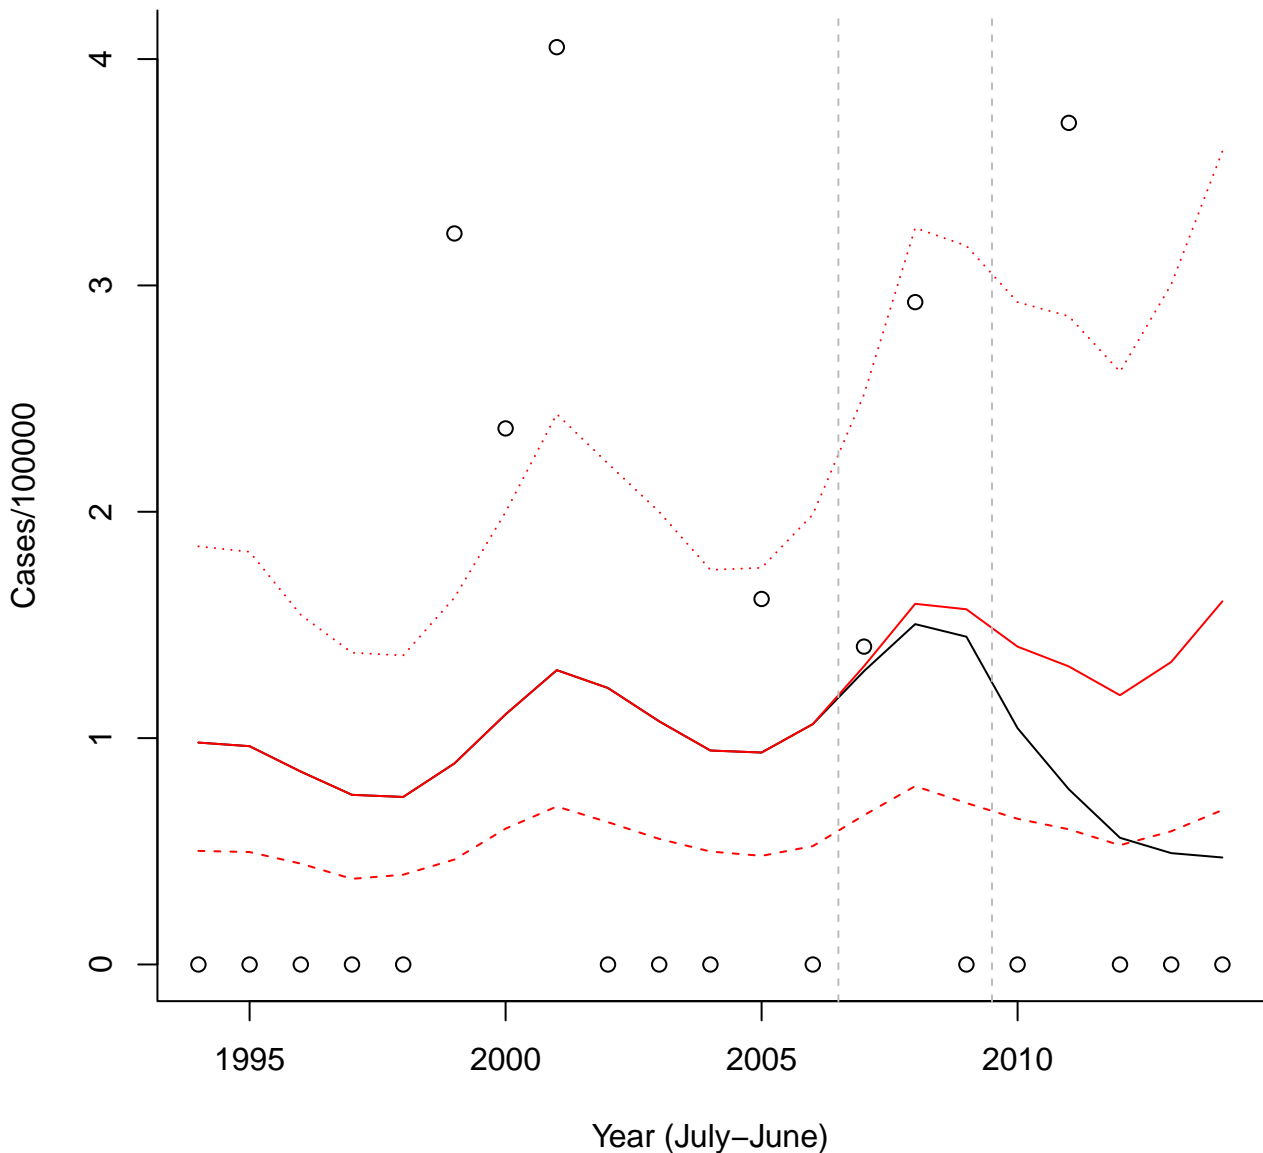

# 5-17y With comorbidity Serotype 8

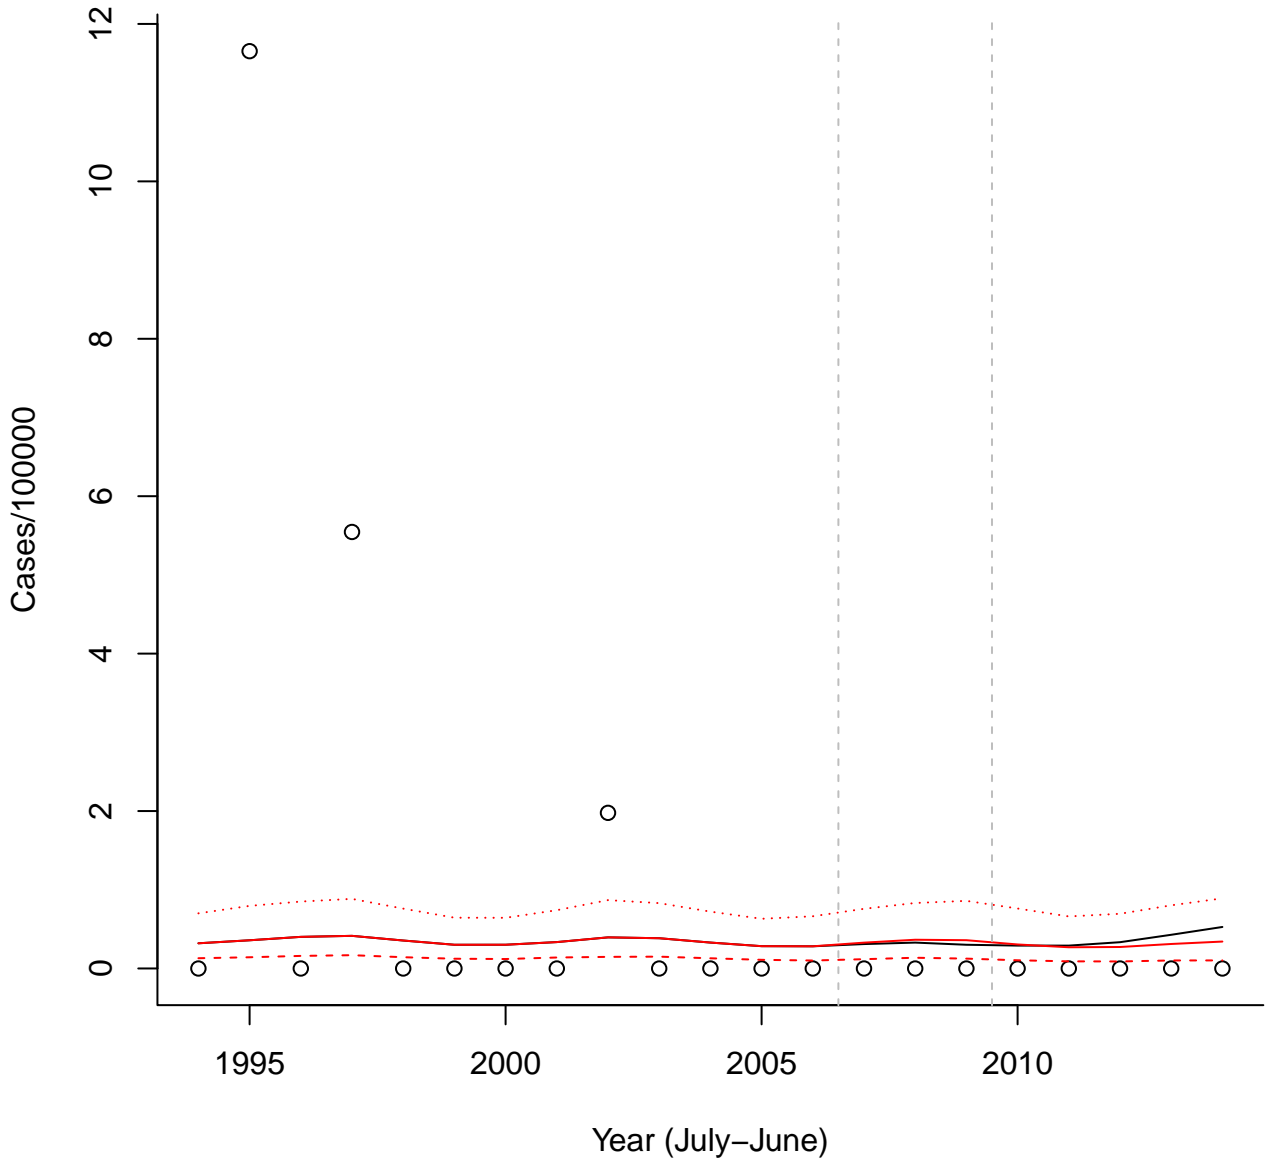

# 5-17y With comorbidity Serotype 9N

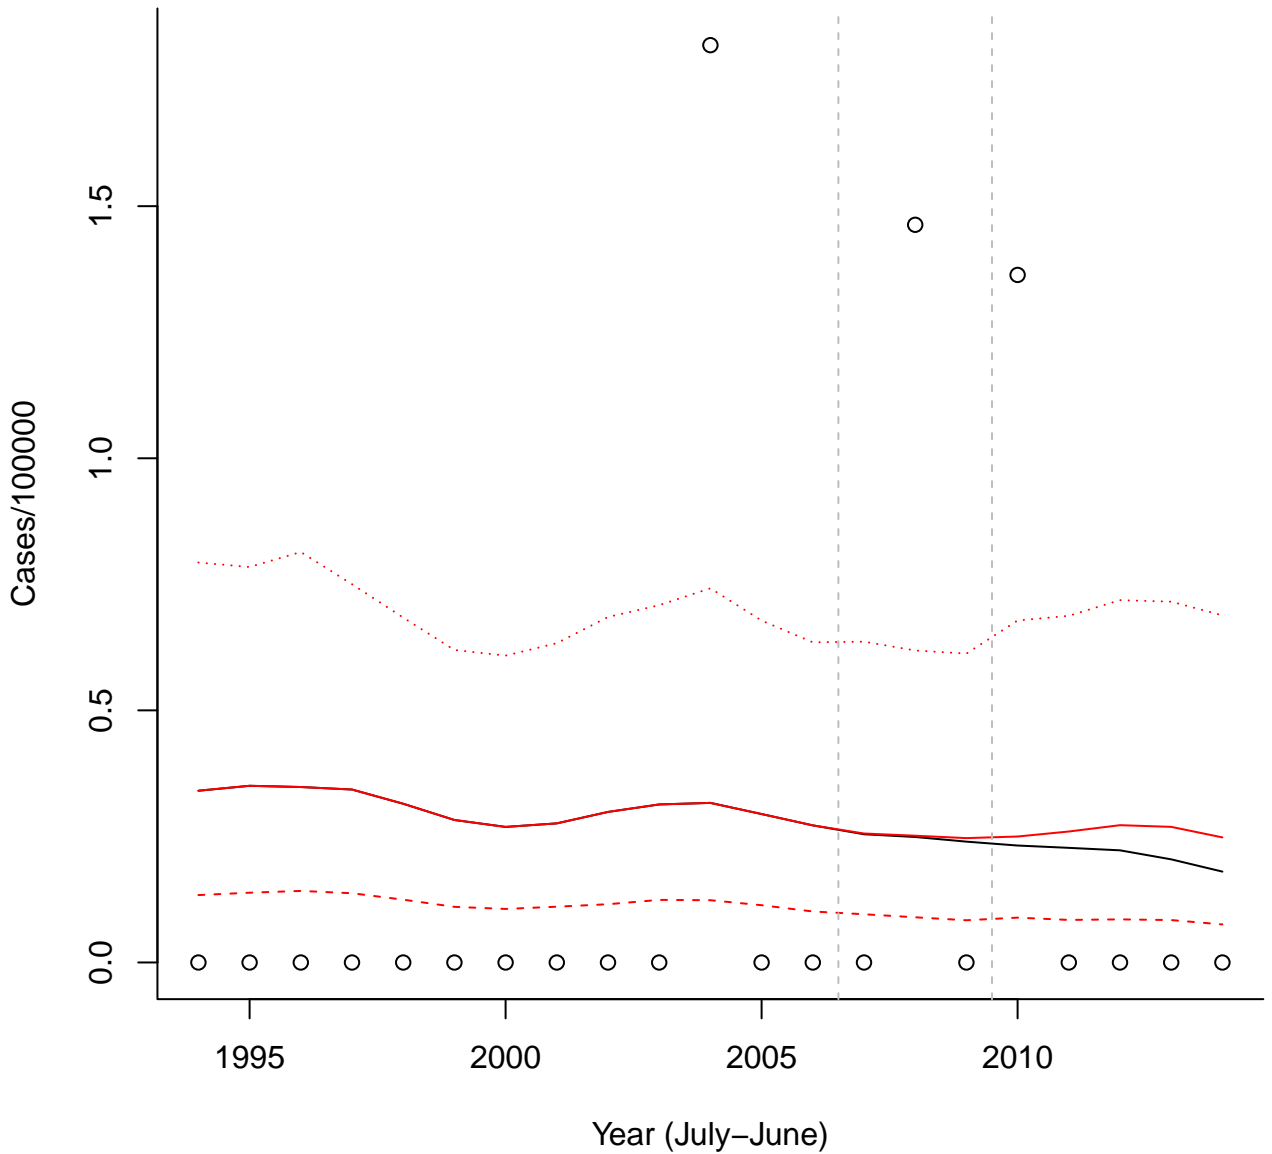

# 5-17y With comorbidity Serotype 9V

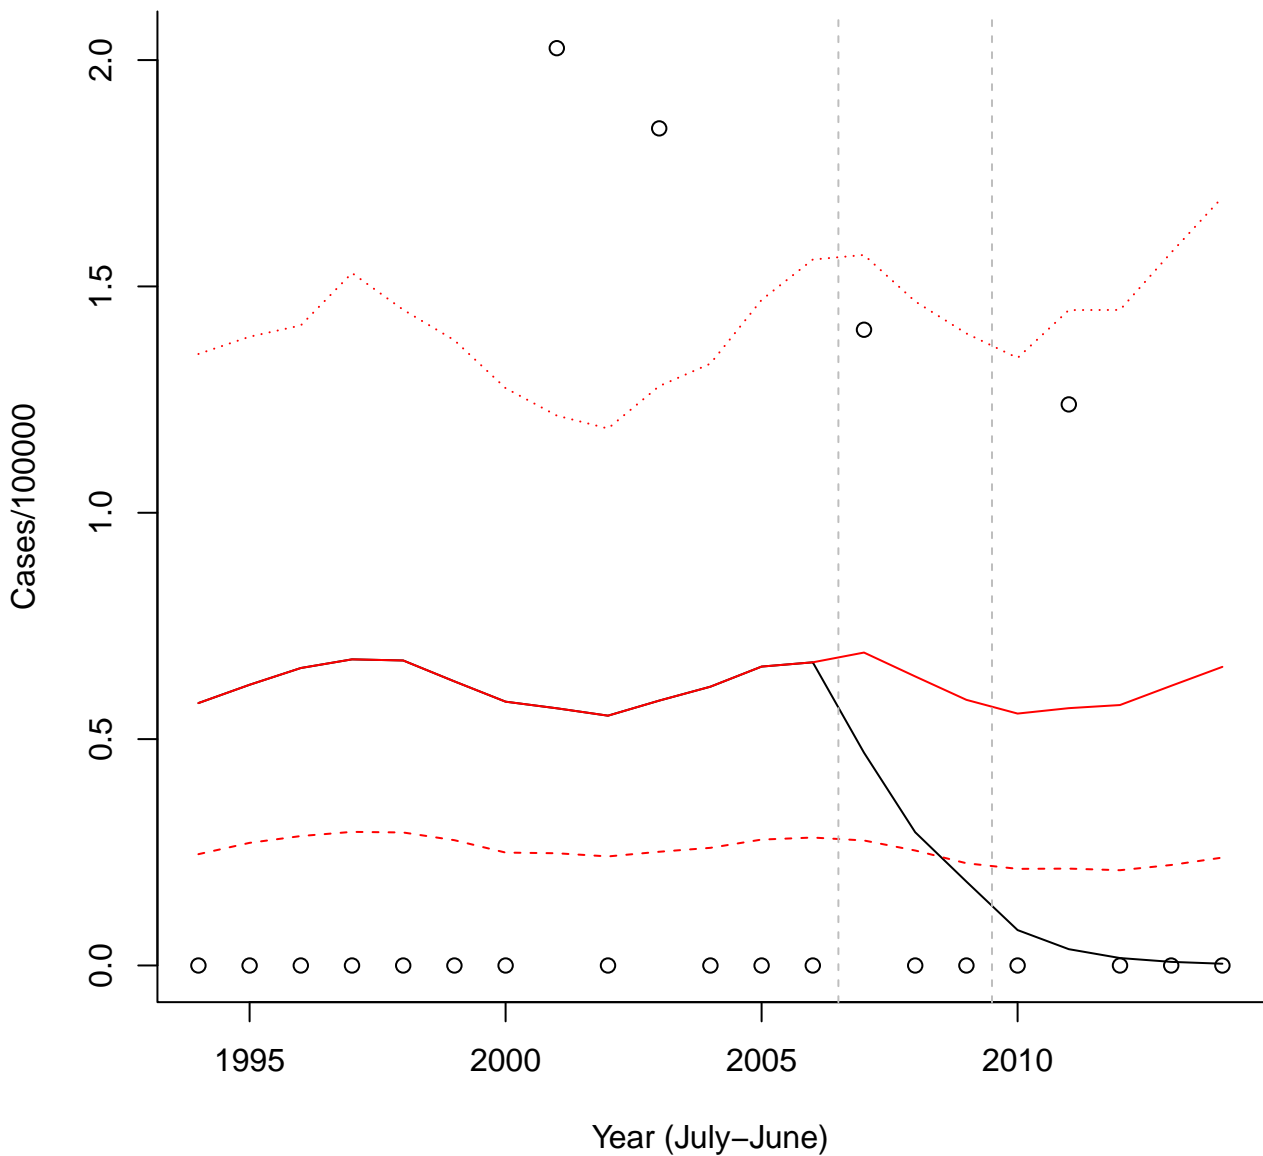



# 18–39y With comorbidity Serotype 1

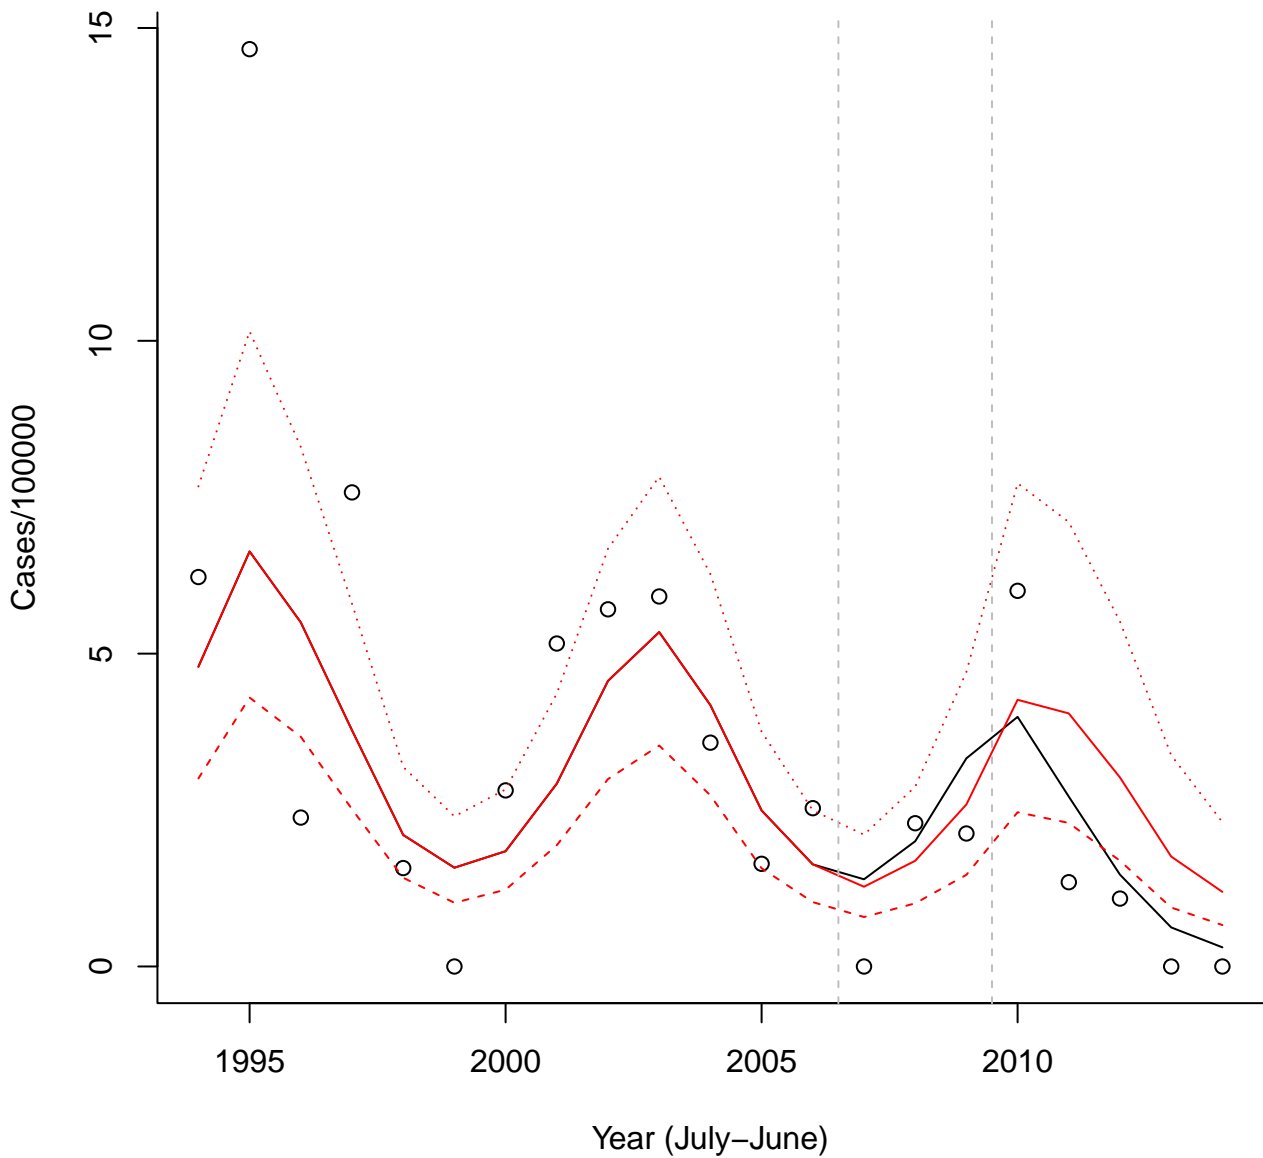

# 18–39y With comorbidity Serotype 10A

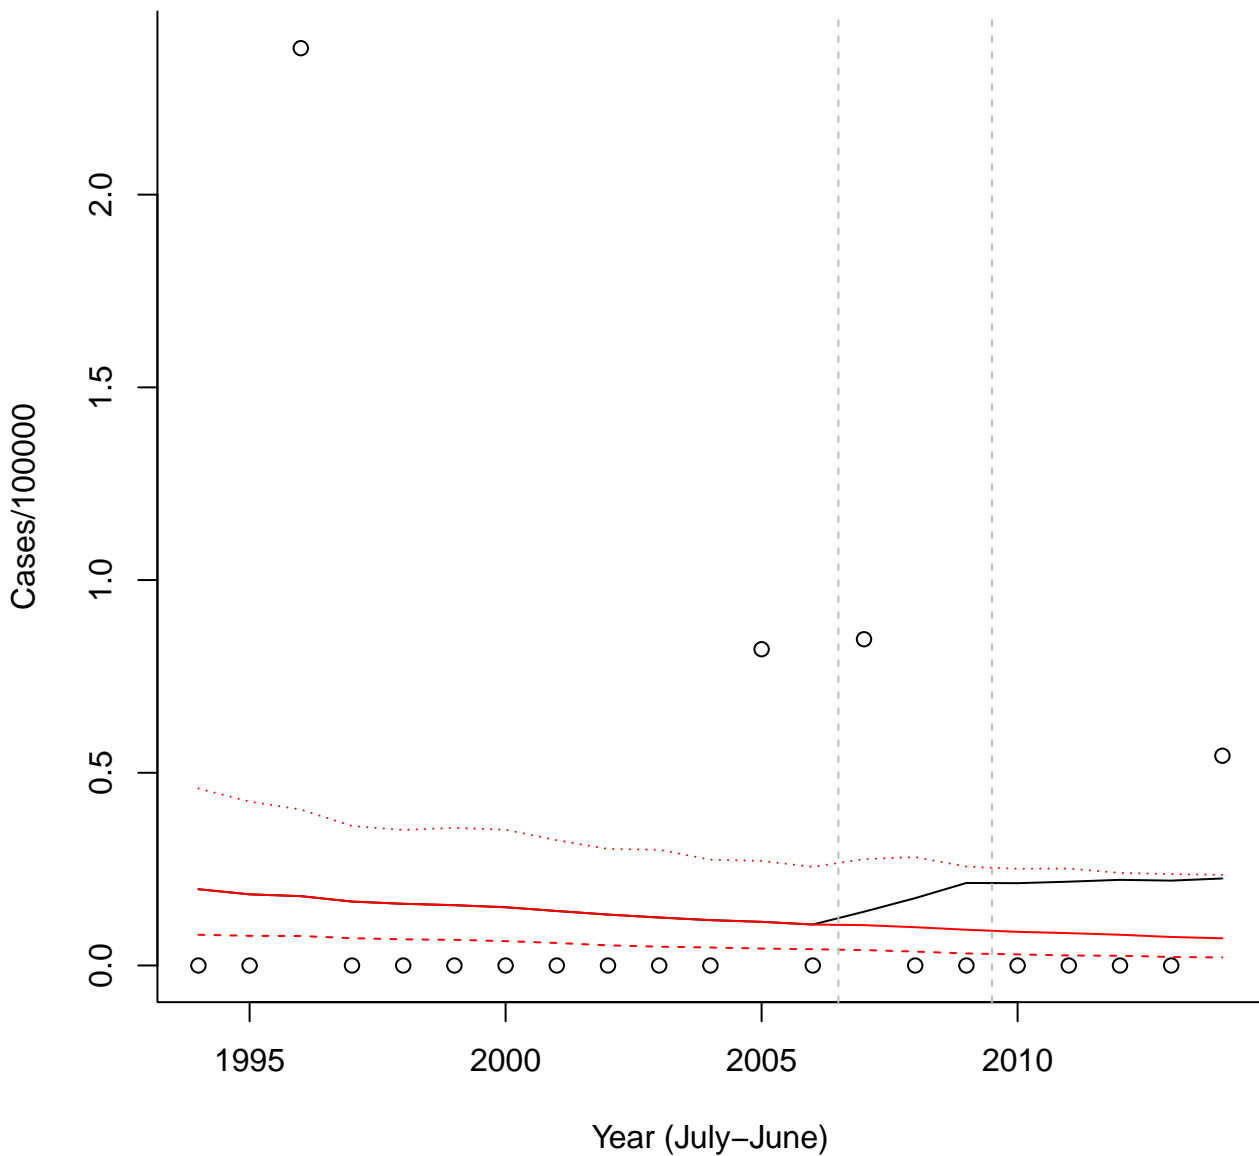

# 18–39y With comorbidity Serotype 11A

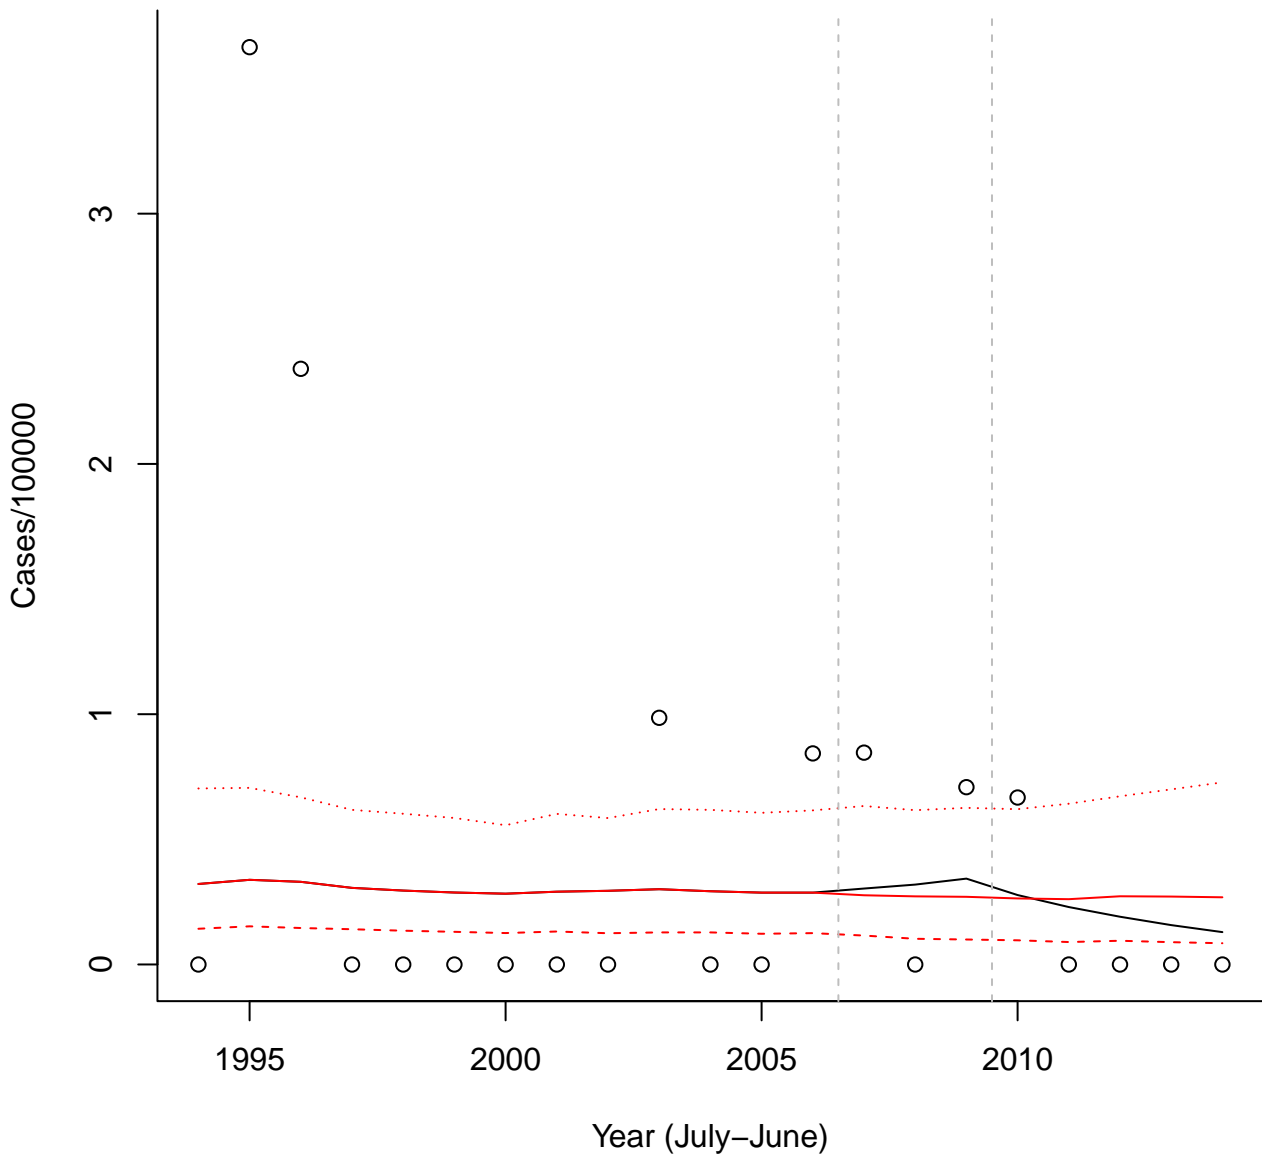

# 18–39y With comorbidity Serotype 12A

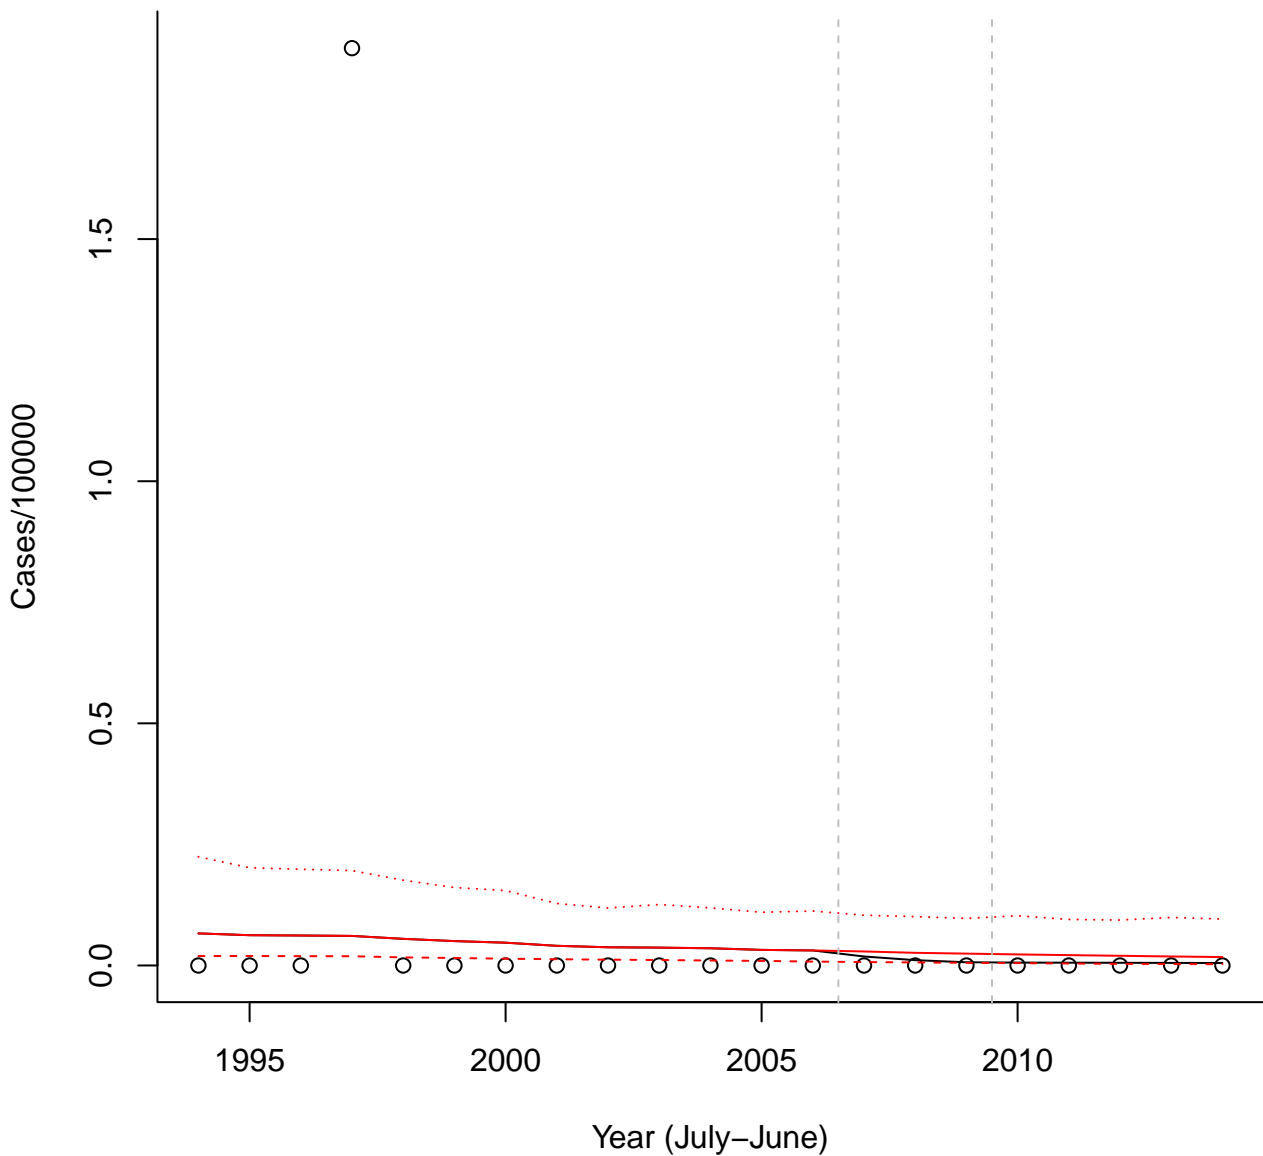

# 18–39y With comorbidity Serotype 12F

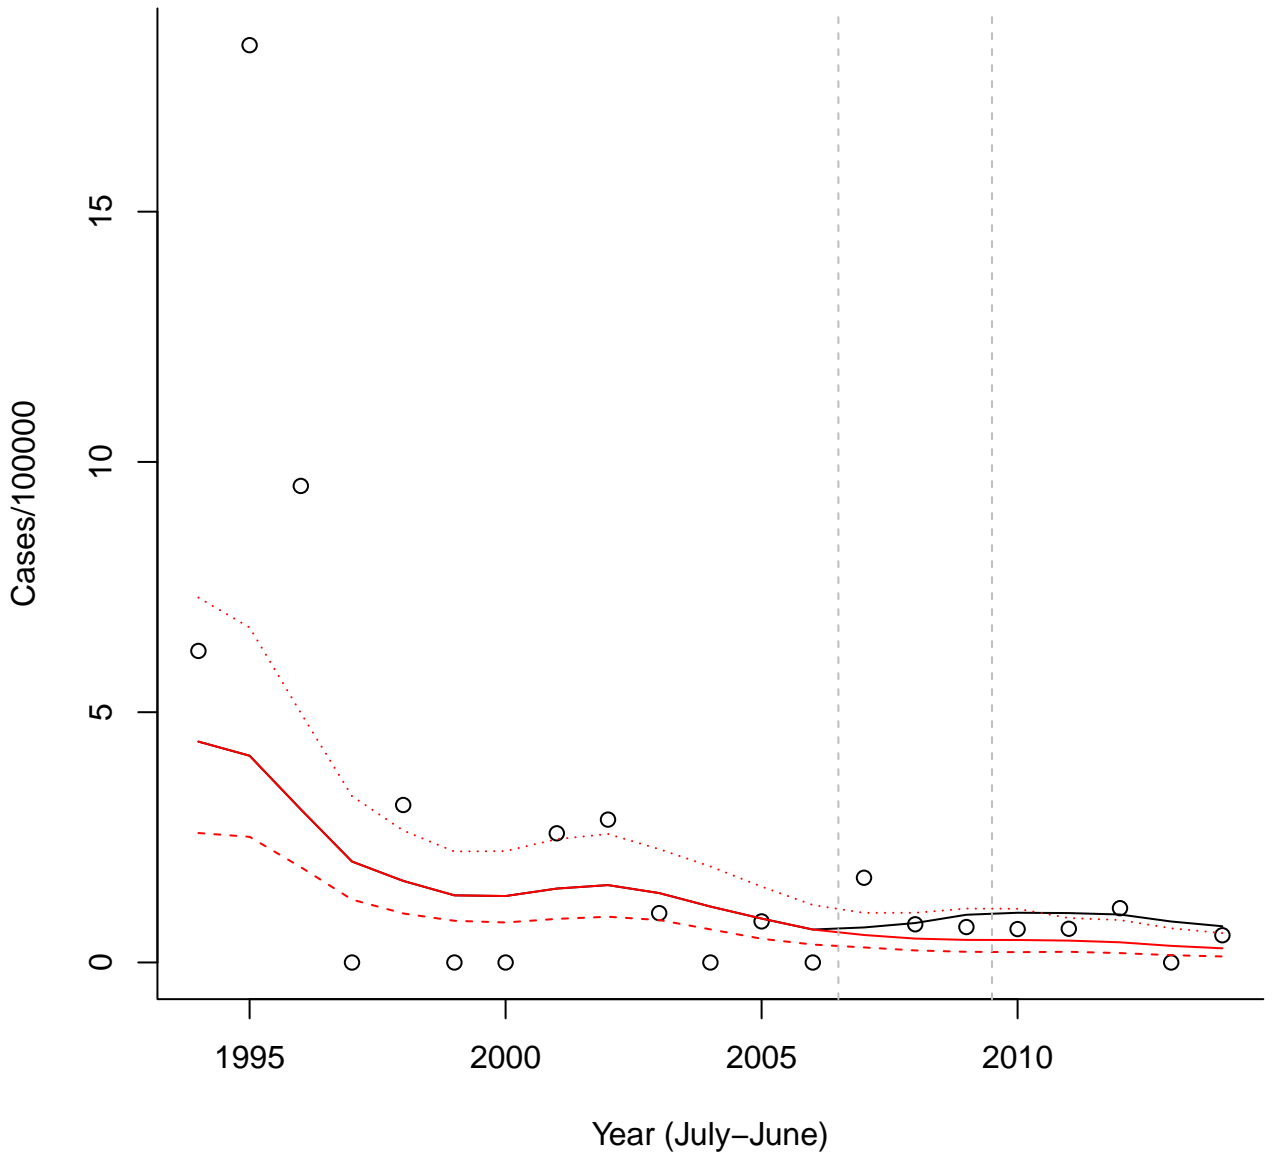

# 18–39y With comorbidity Serotype 13

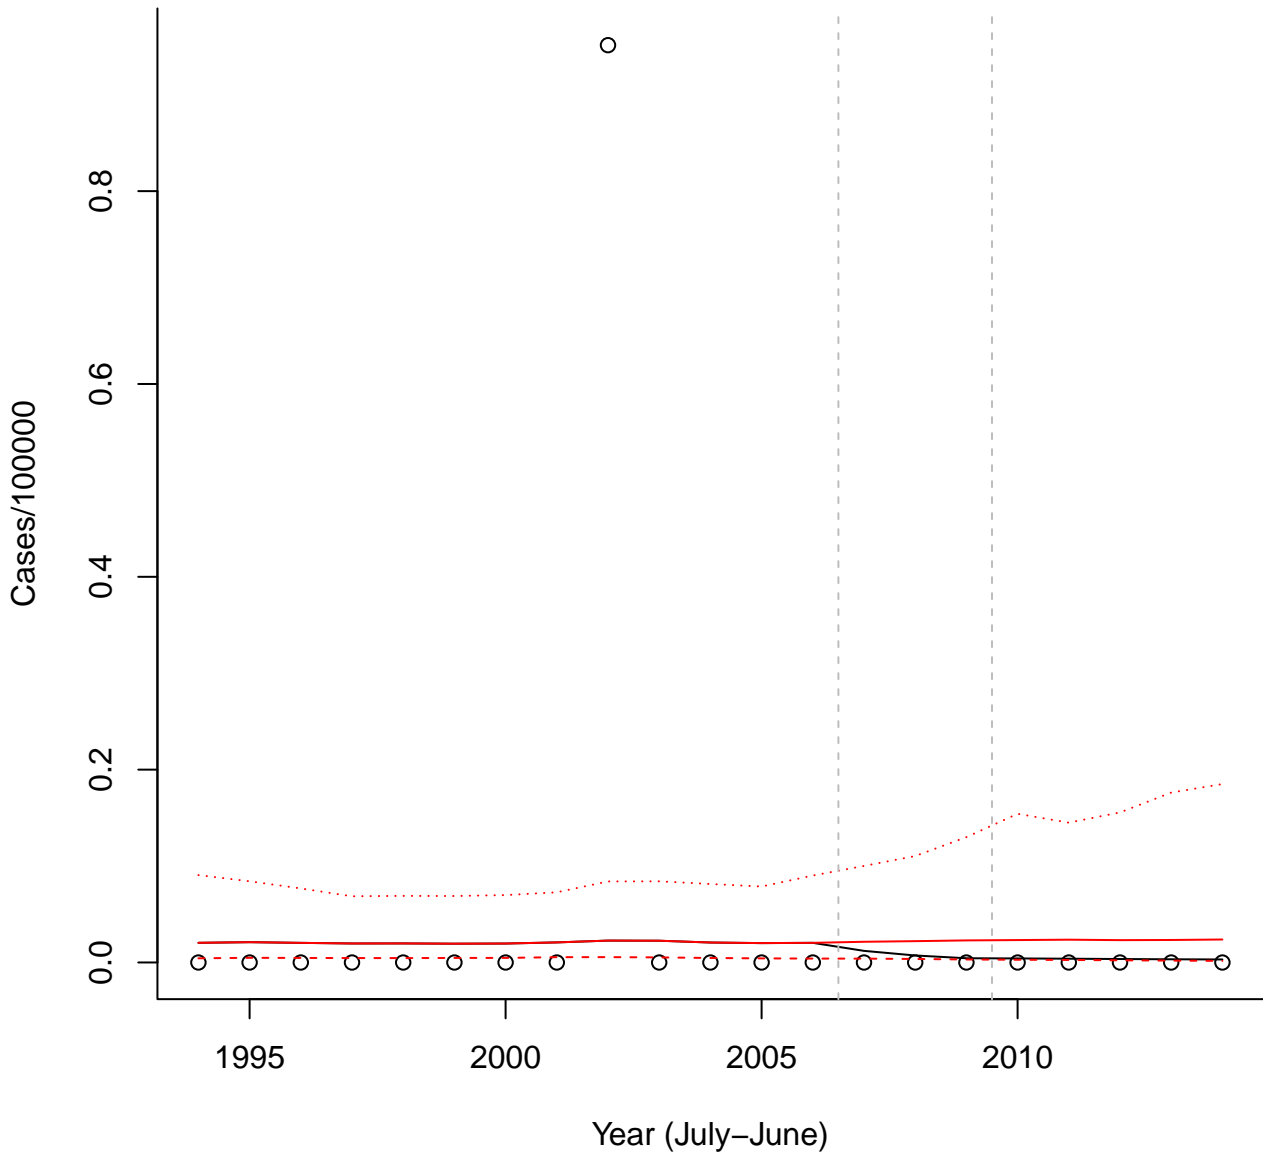

# 18–39y With comorbidity Serotype 14

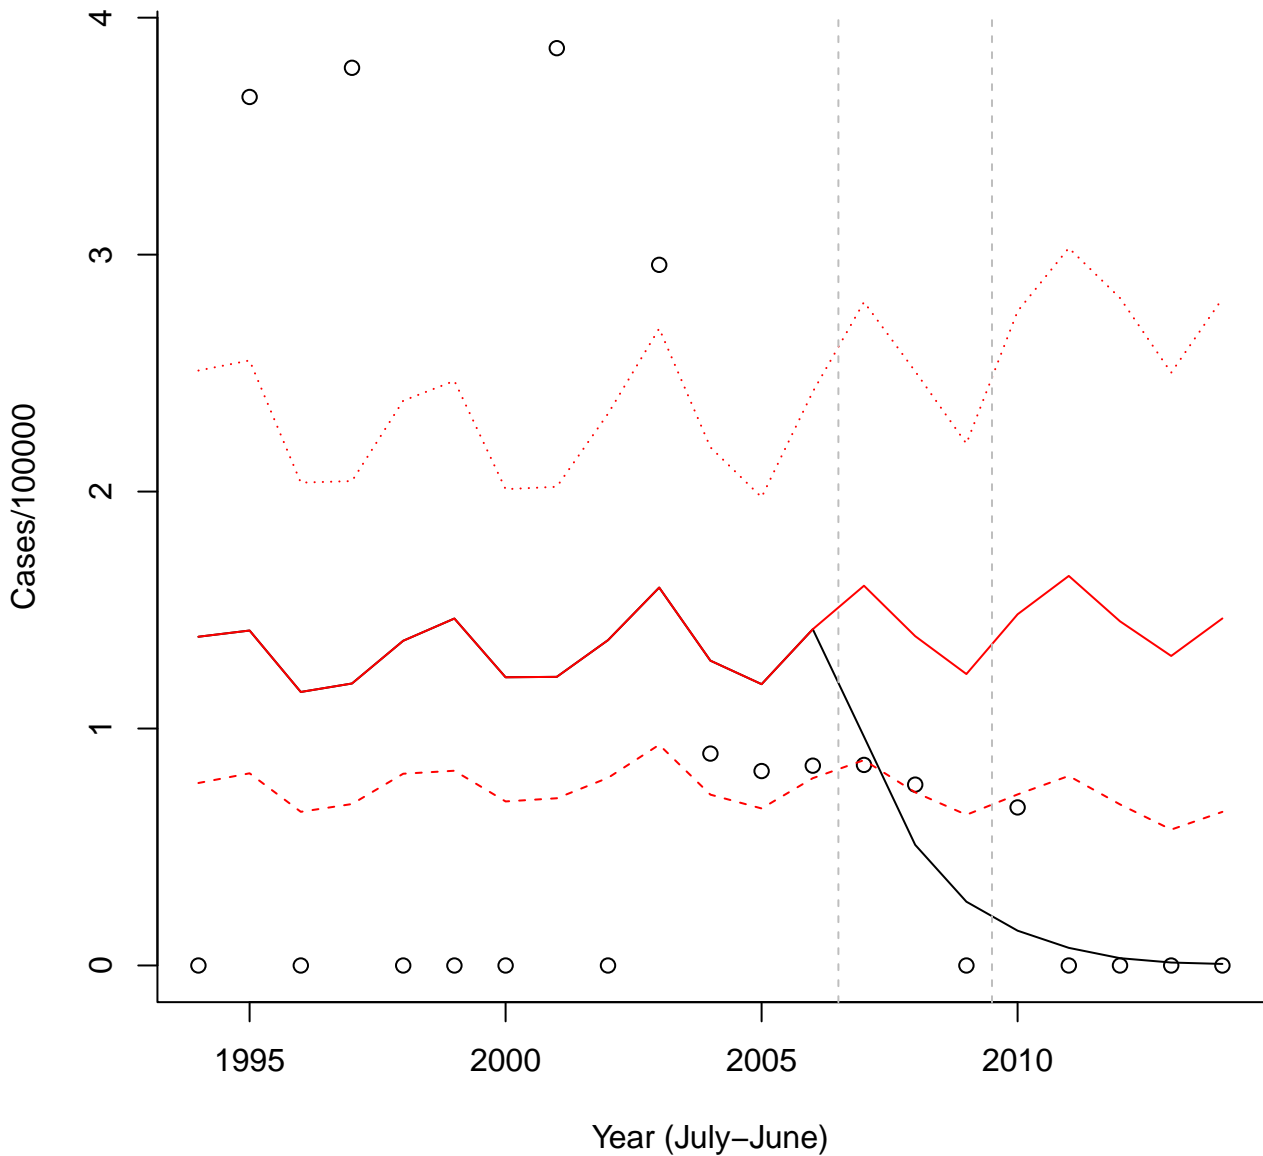

# 18-39y With comorbidity Serotype 15A

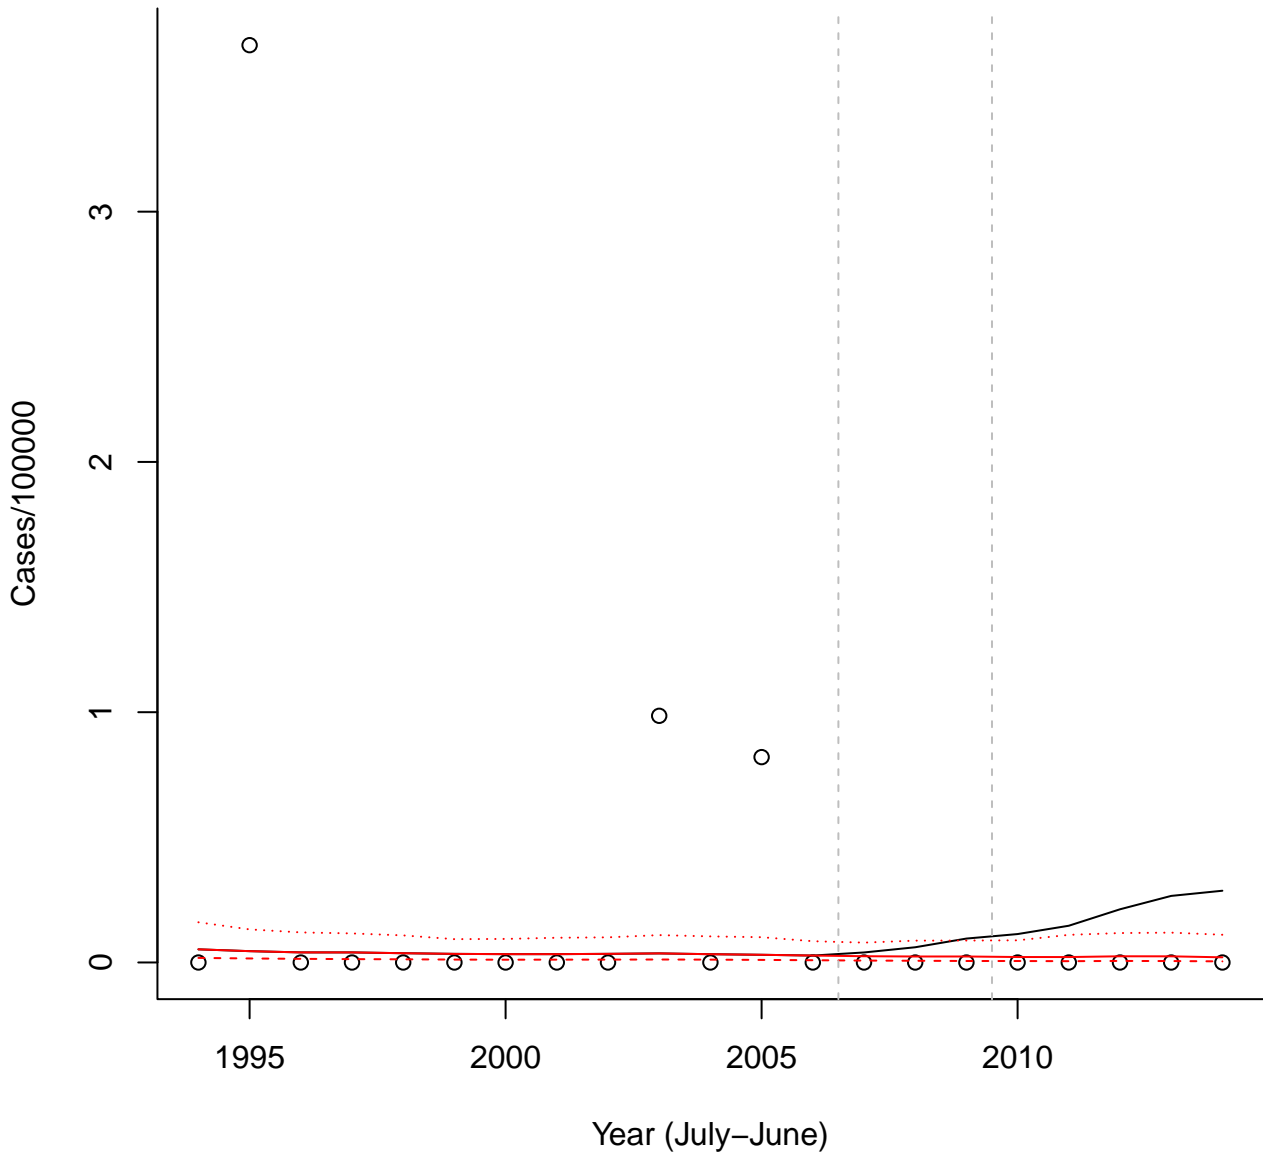



# 18–39y With comorbidity Serotype 15BC

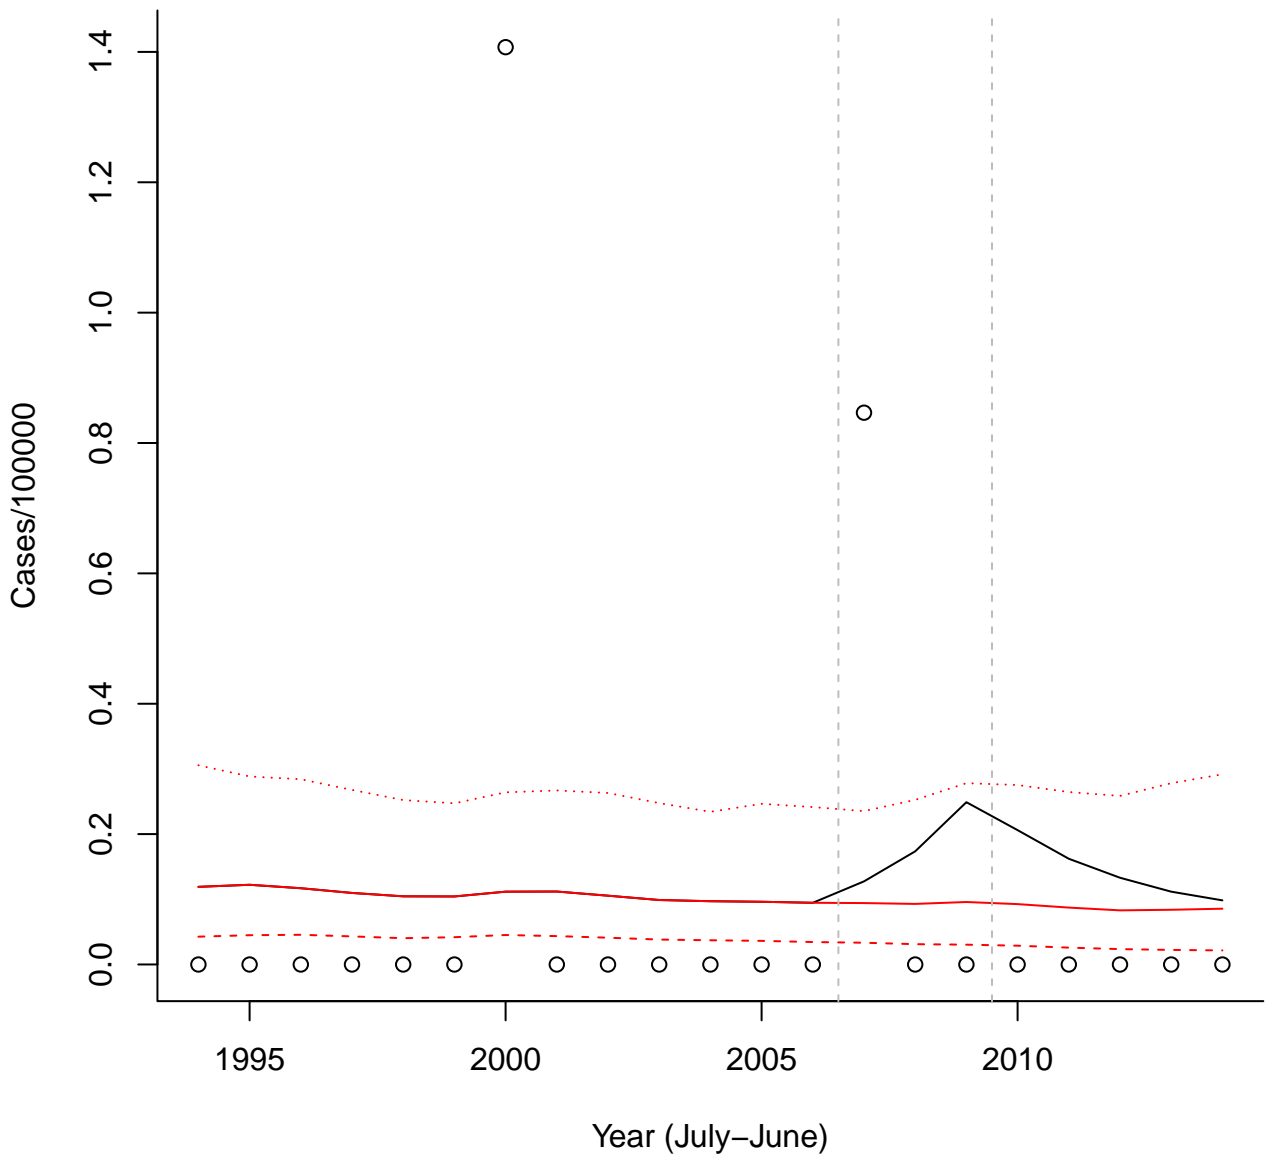

# 18–39y With comorbidity Serotype 16F

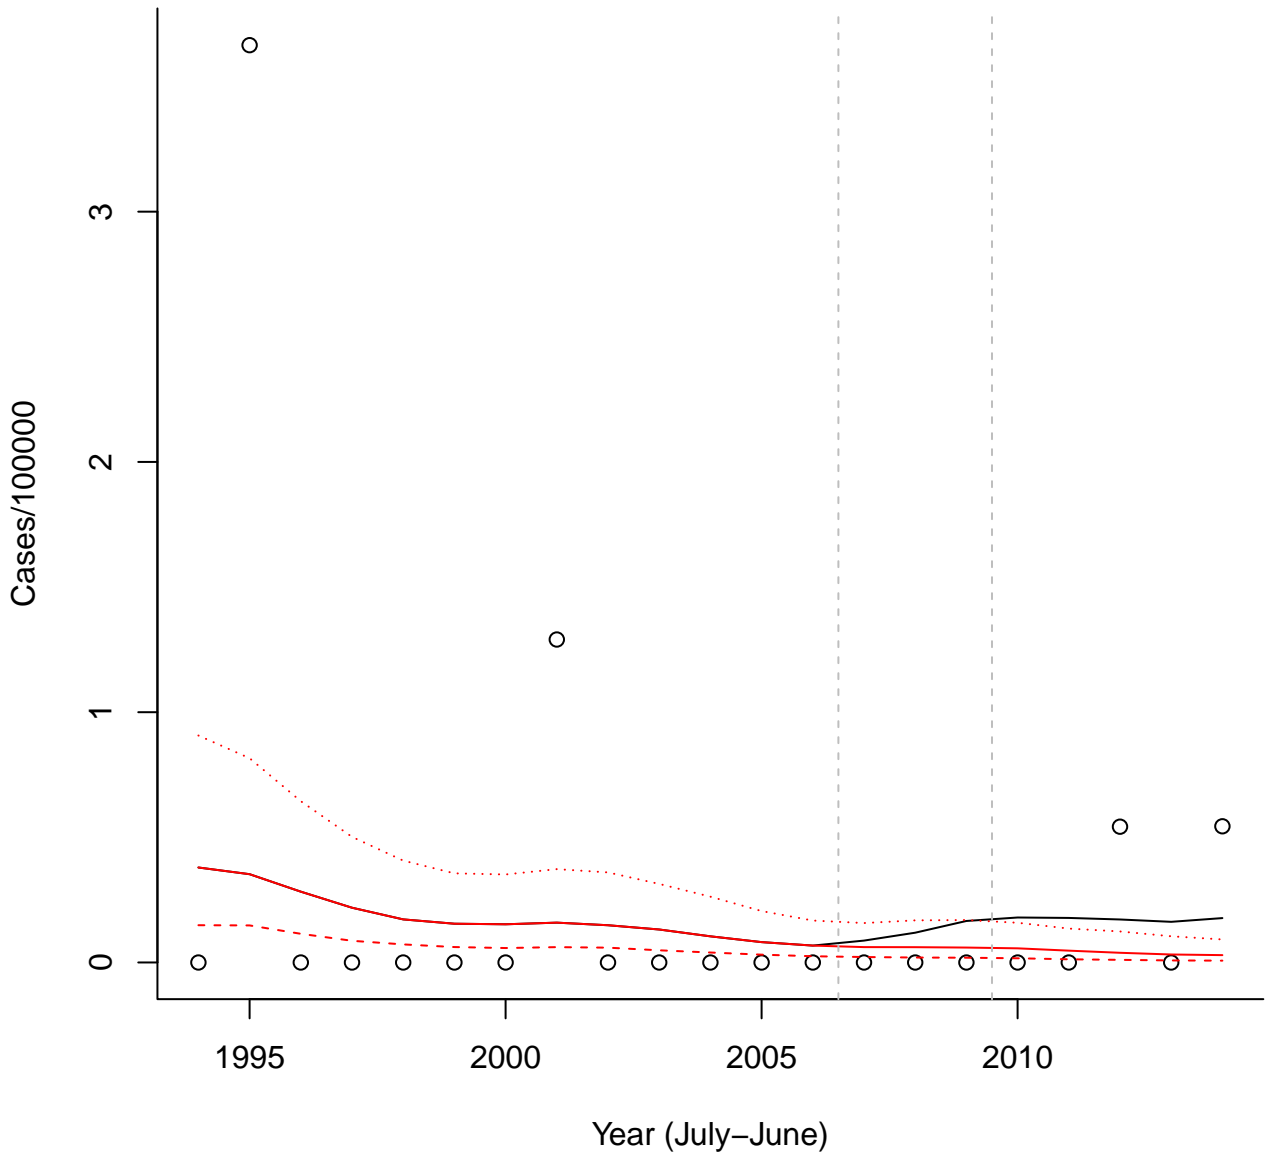

# 18–39y With comorbidity Serotype 17F

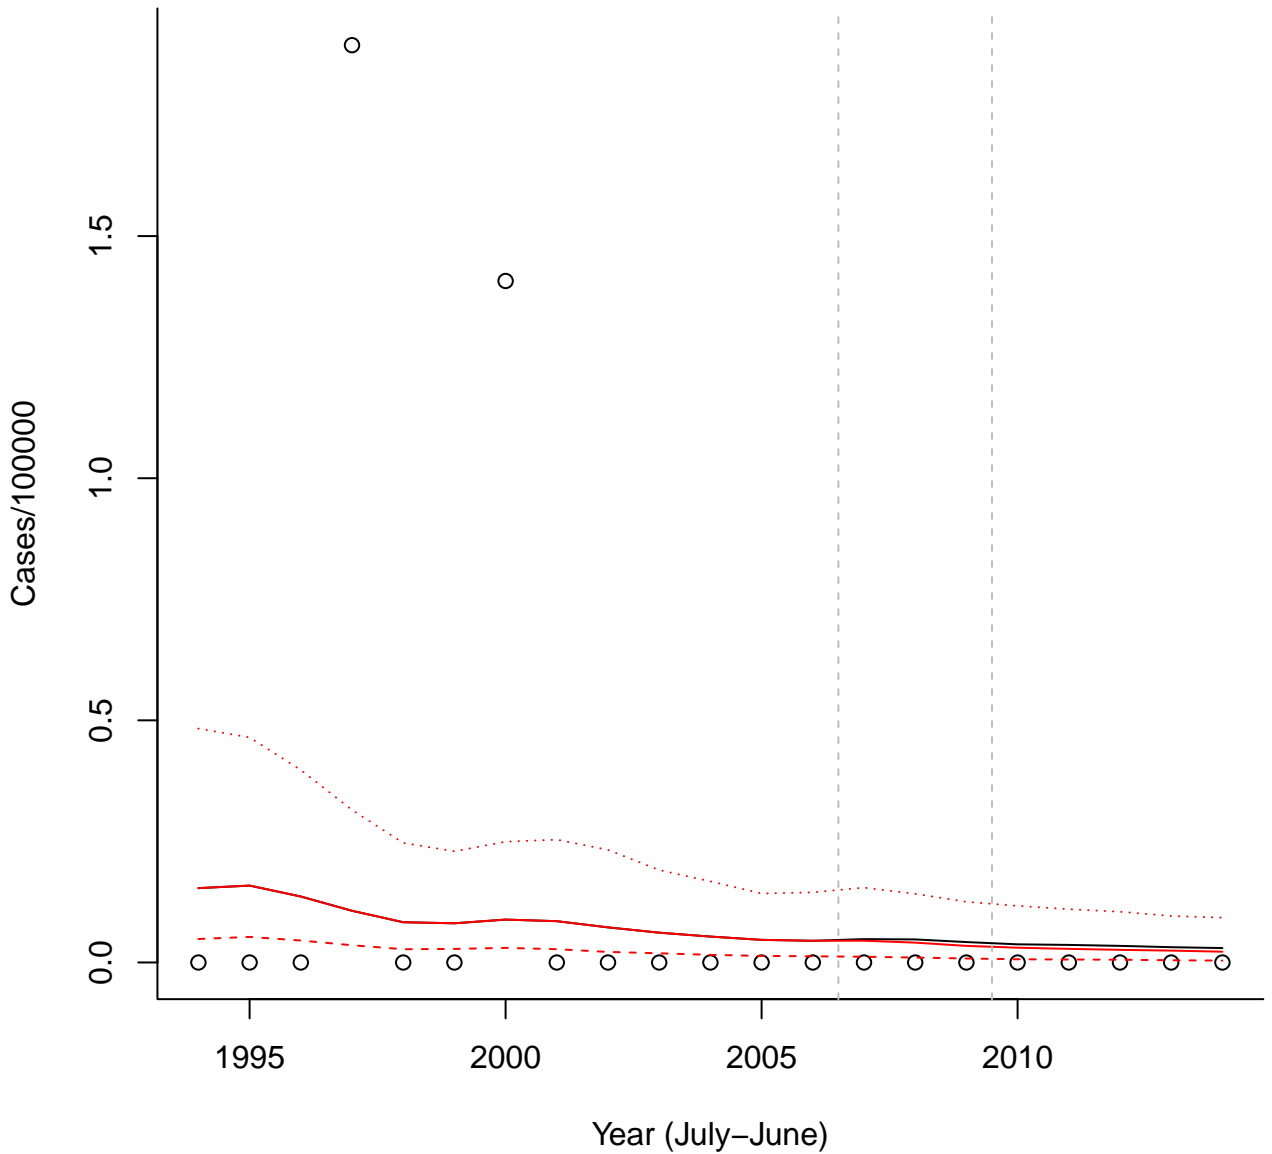

# 18-39y With comorbidity Serotype 18C

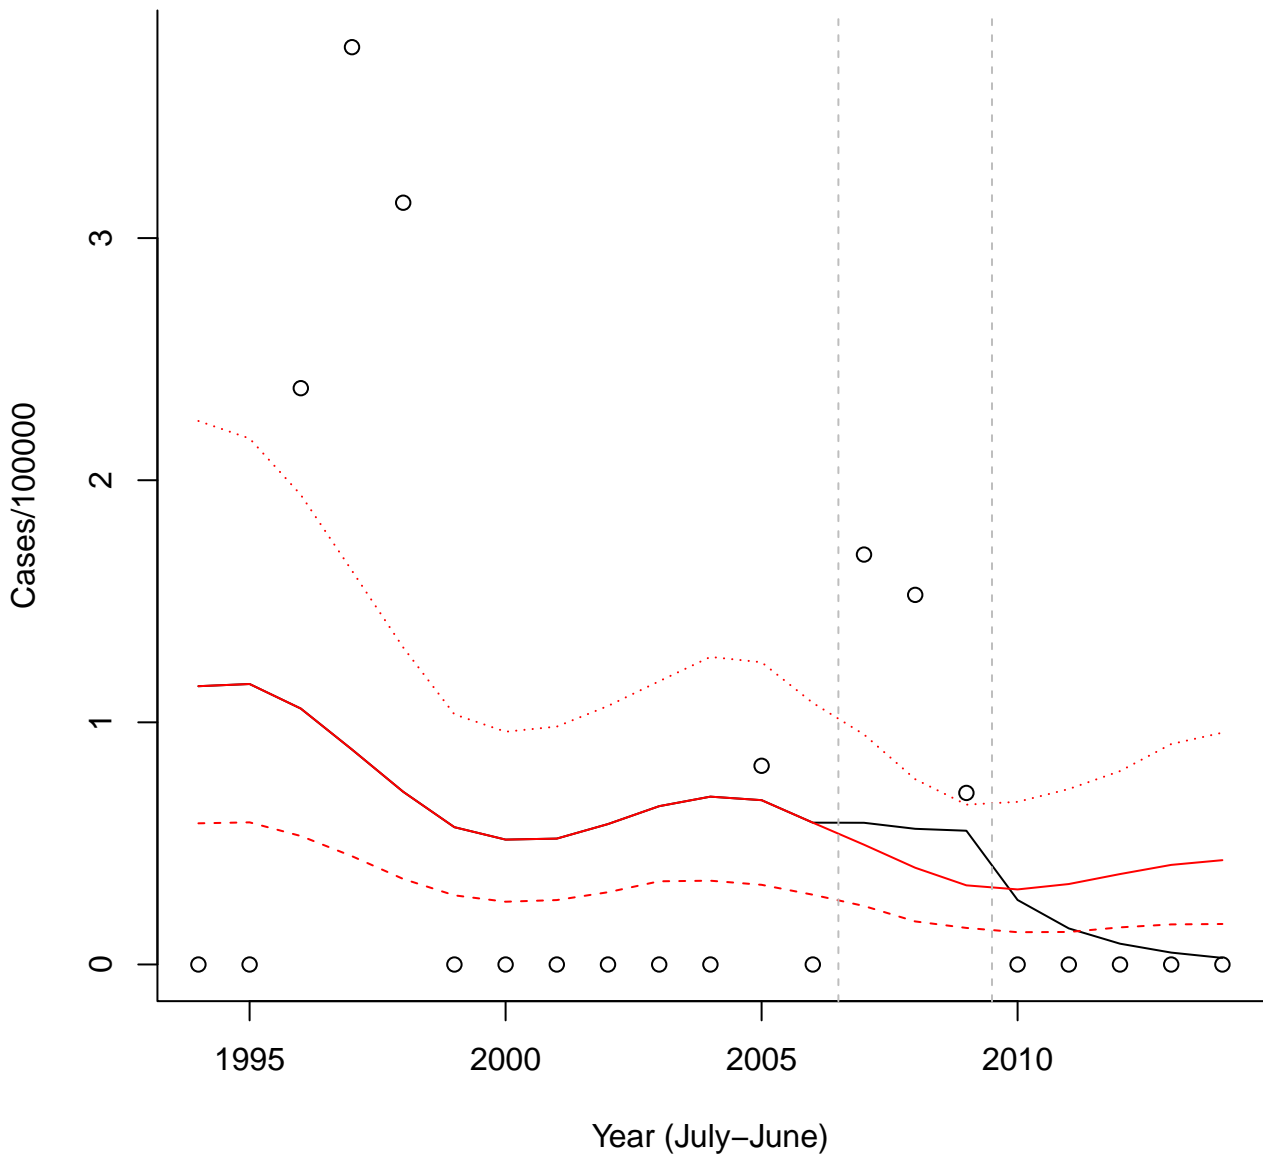

# 18–39y With comorbidity Serotype 18F

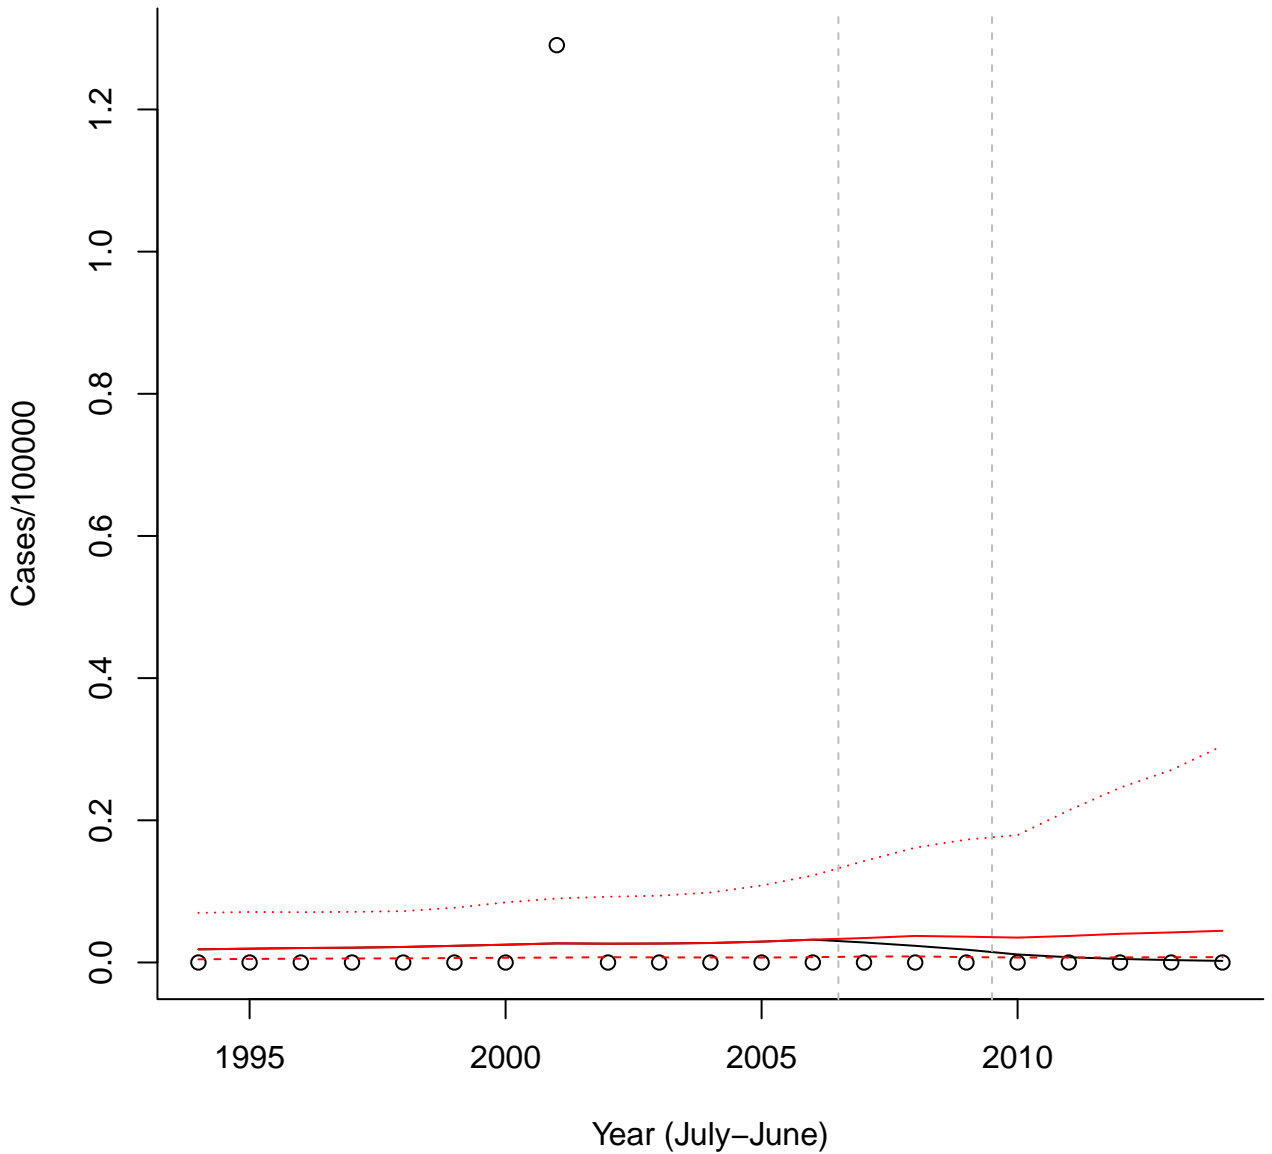

# 18–39y With comorbidity Serotype 19A

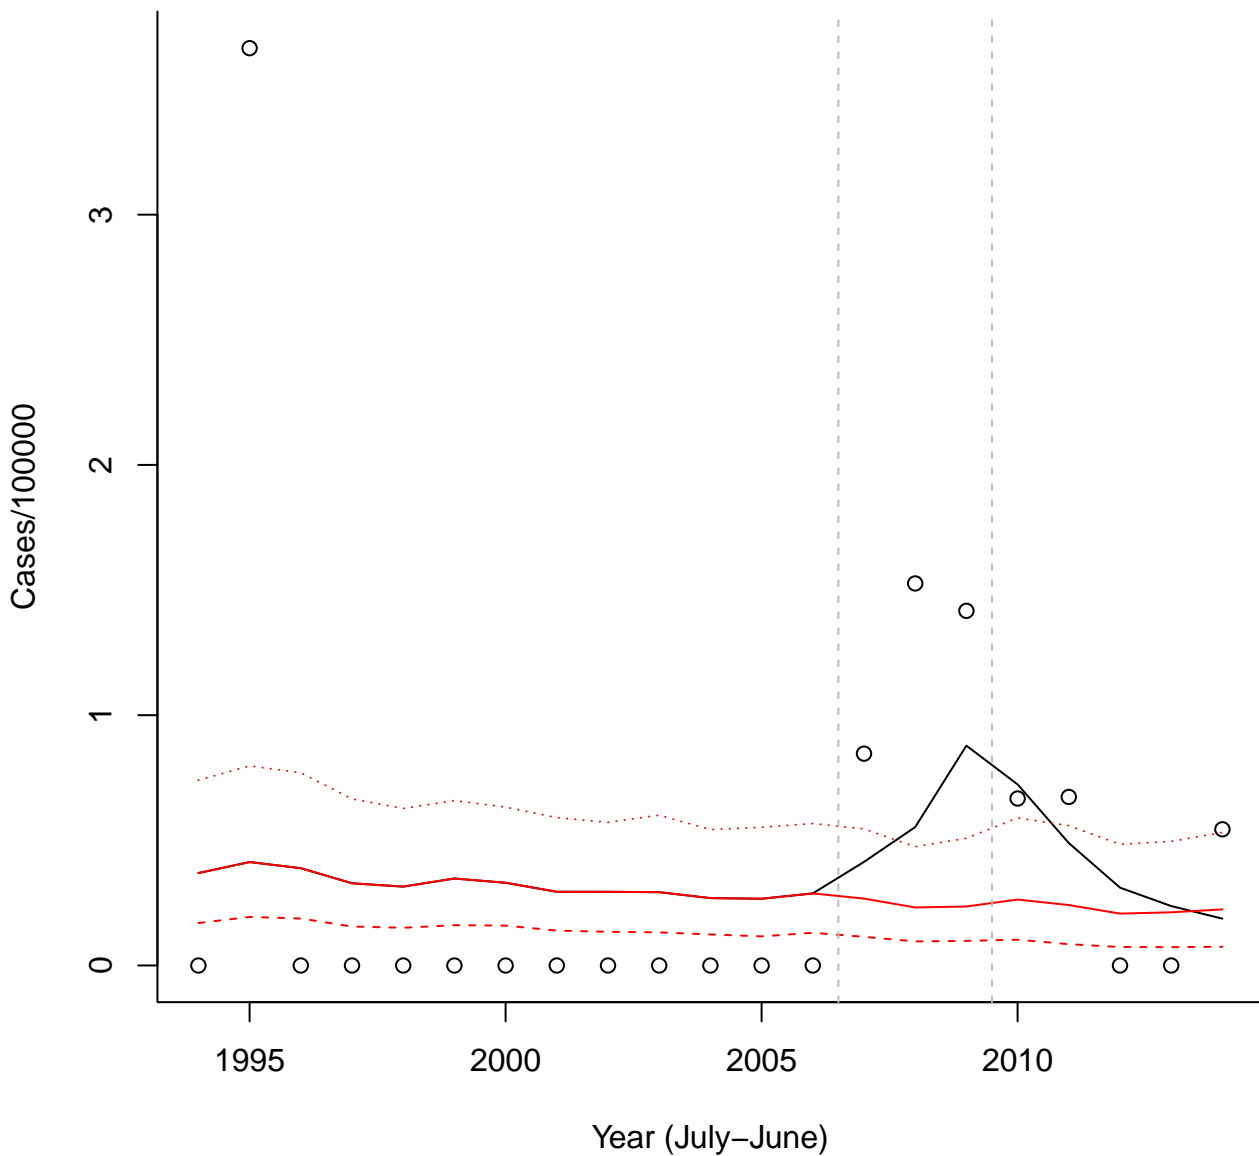

# 18-39y With comorbidity Serotype 19F

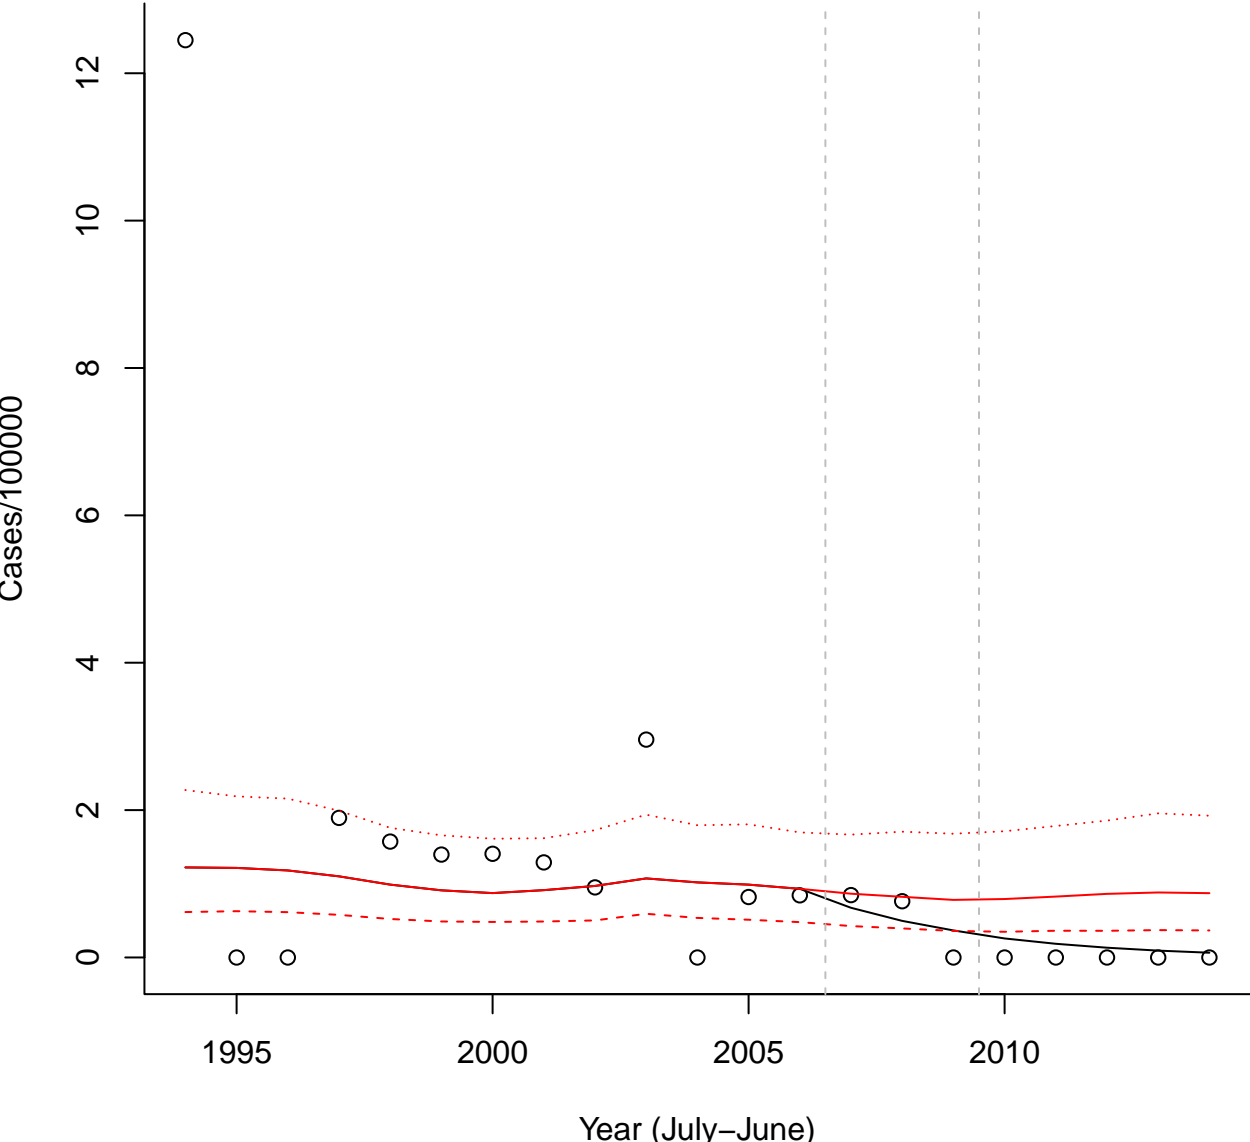

# 18–39y With comorbidity Serotype 20

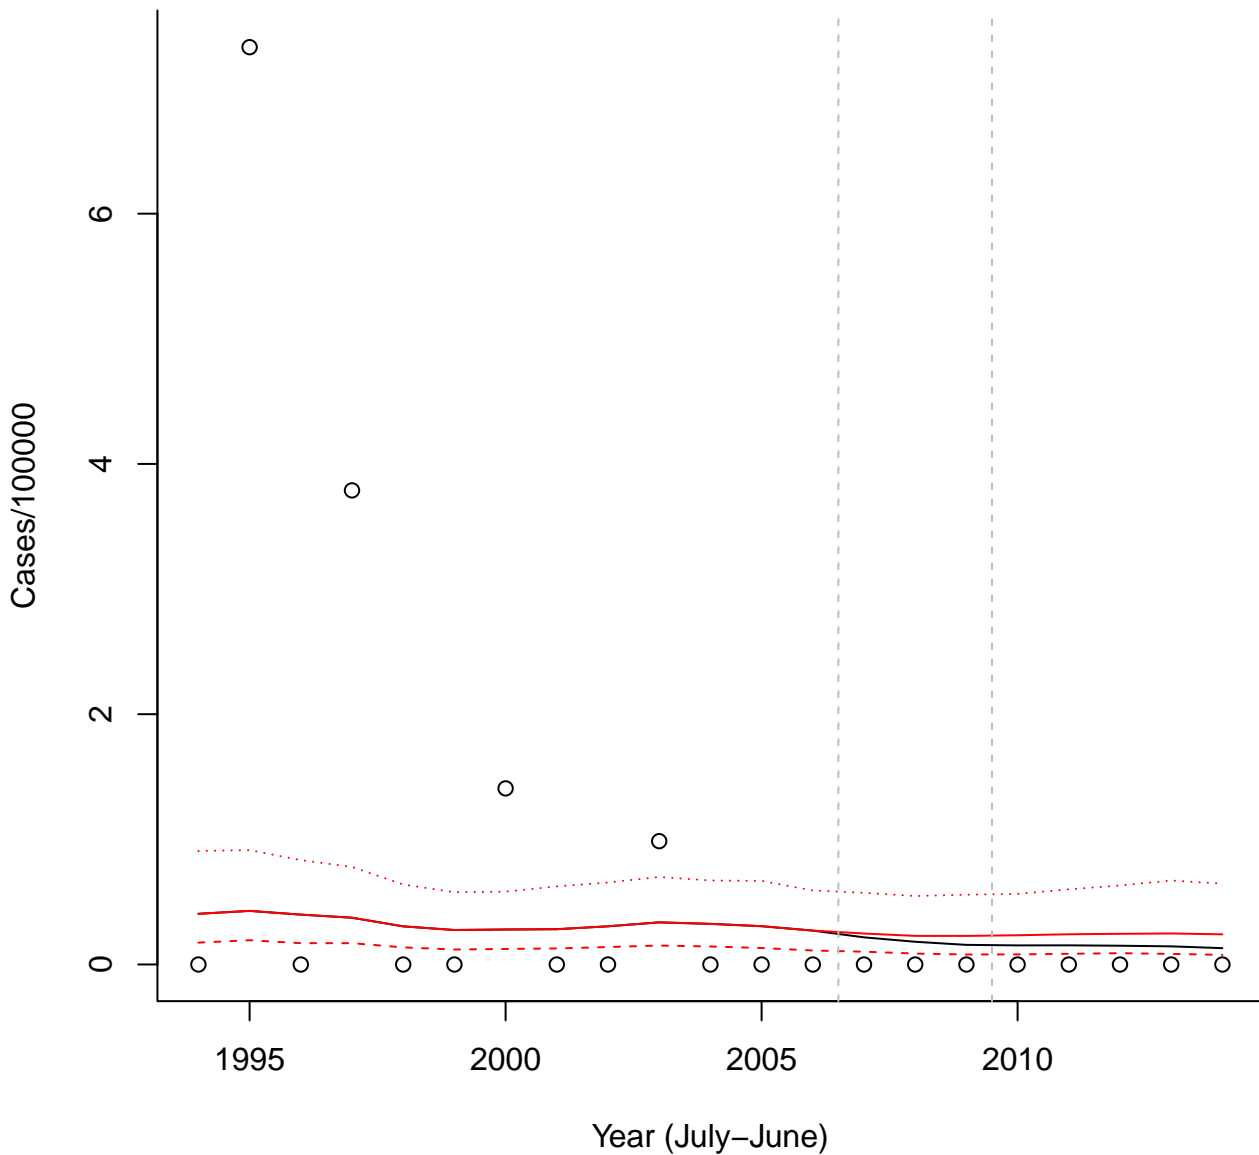



# 18–39y With comorbidity Serotype 21

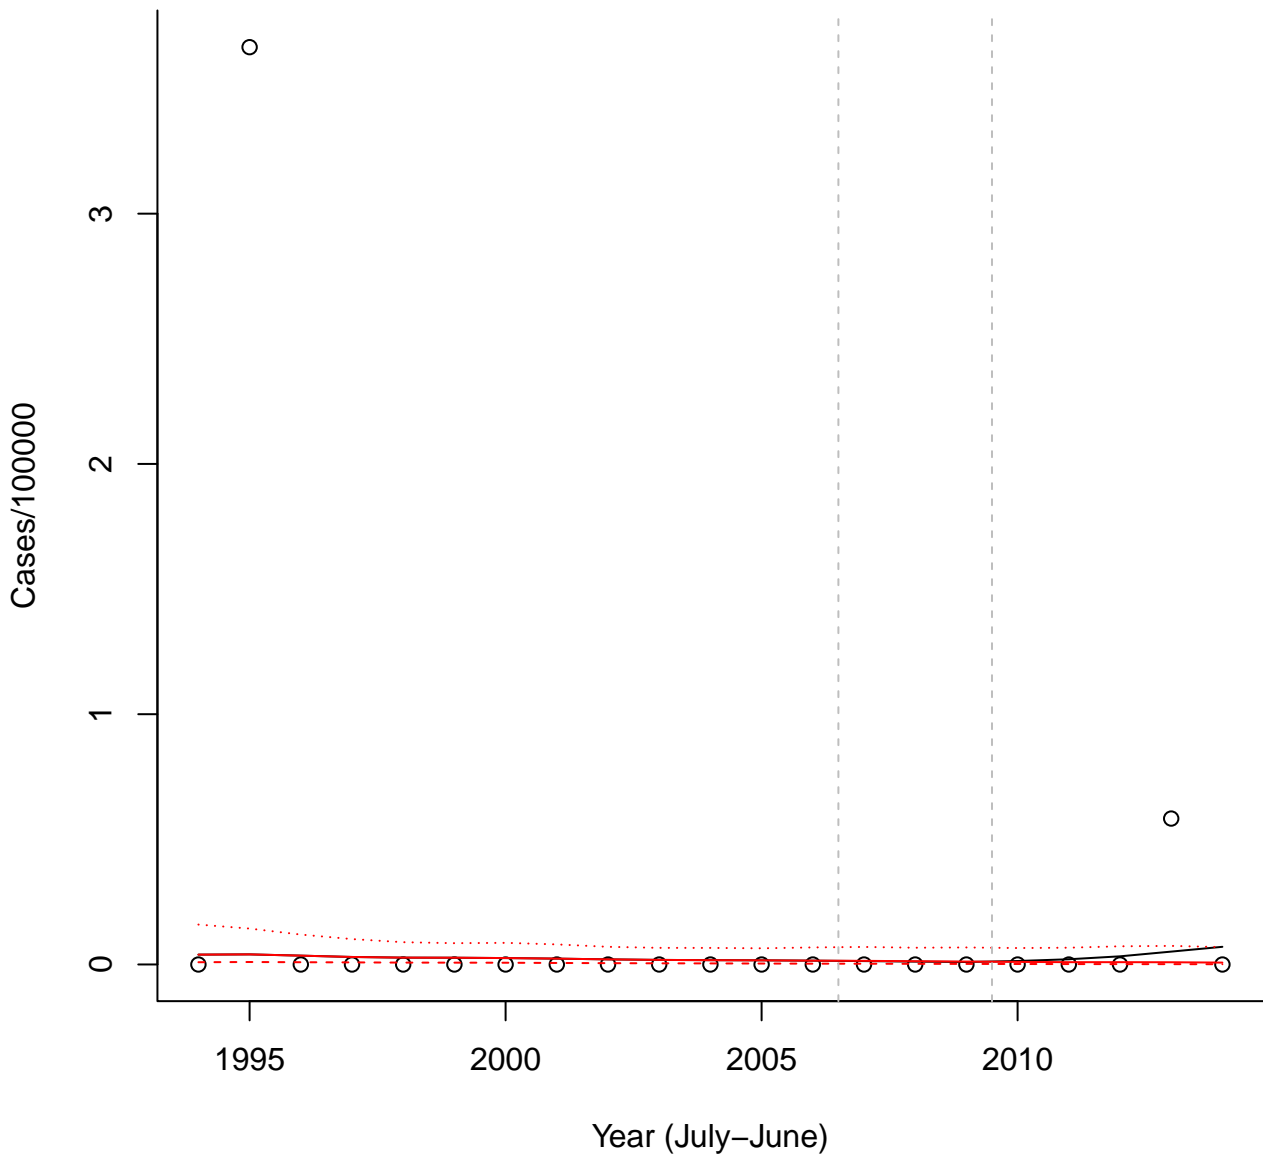

# 18–39y With comorbidity Serotype 22F

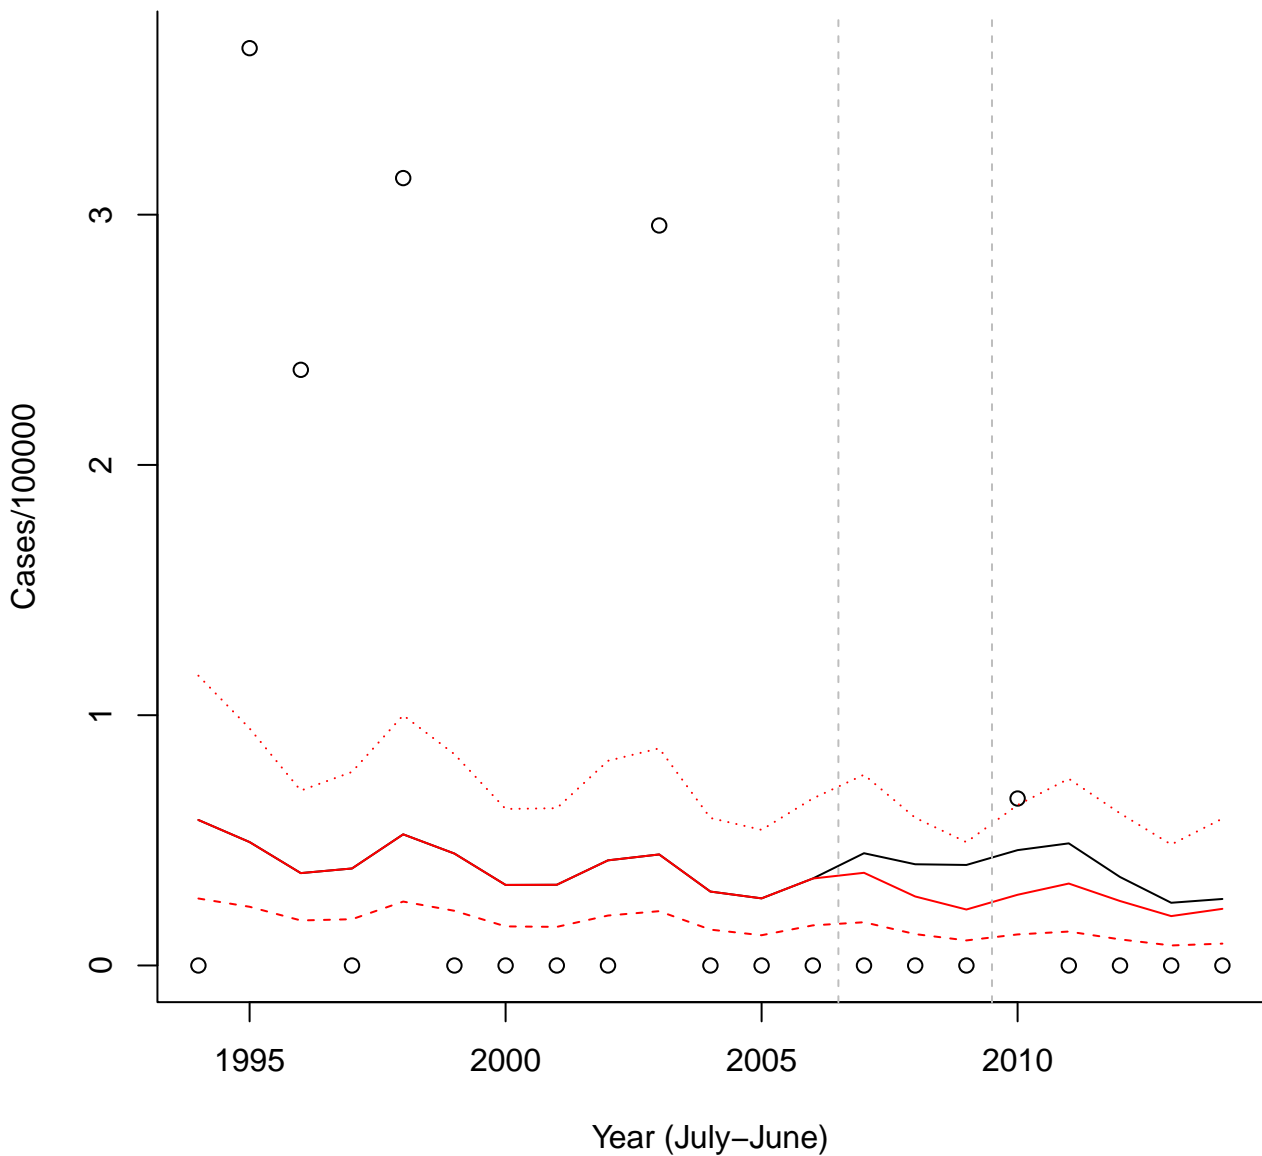

# 18–39y With comorbidity Serotype 23A

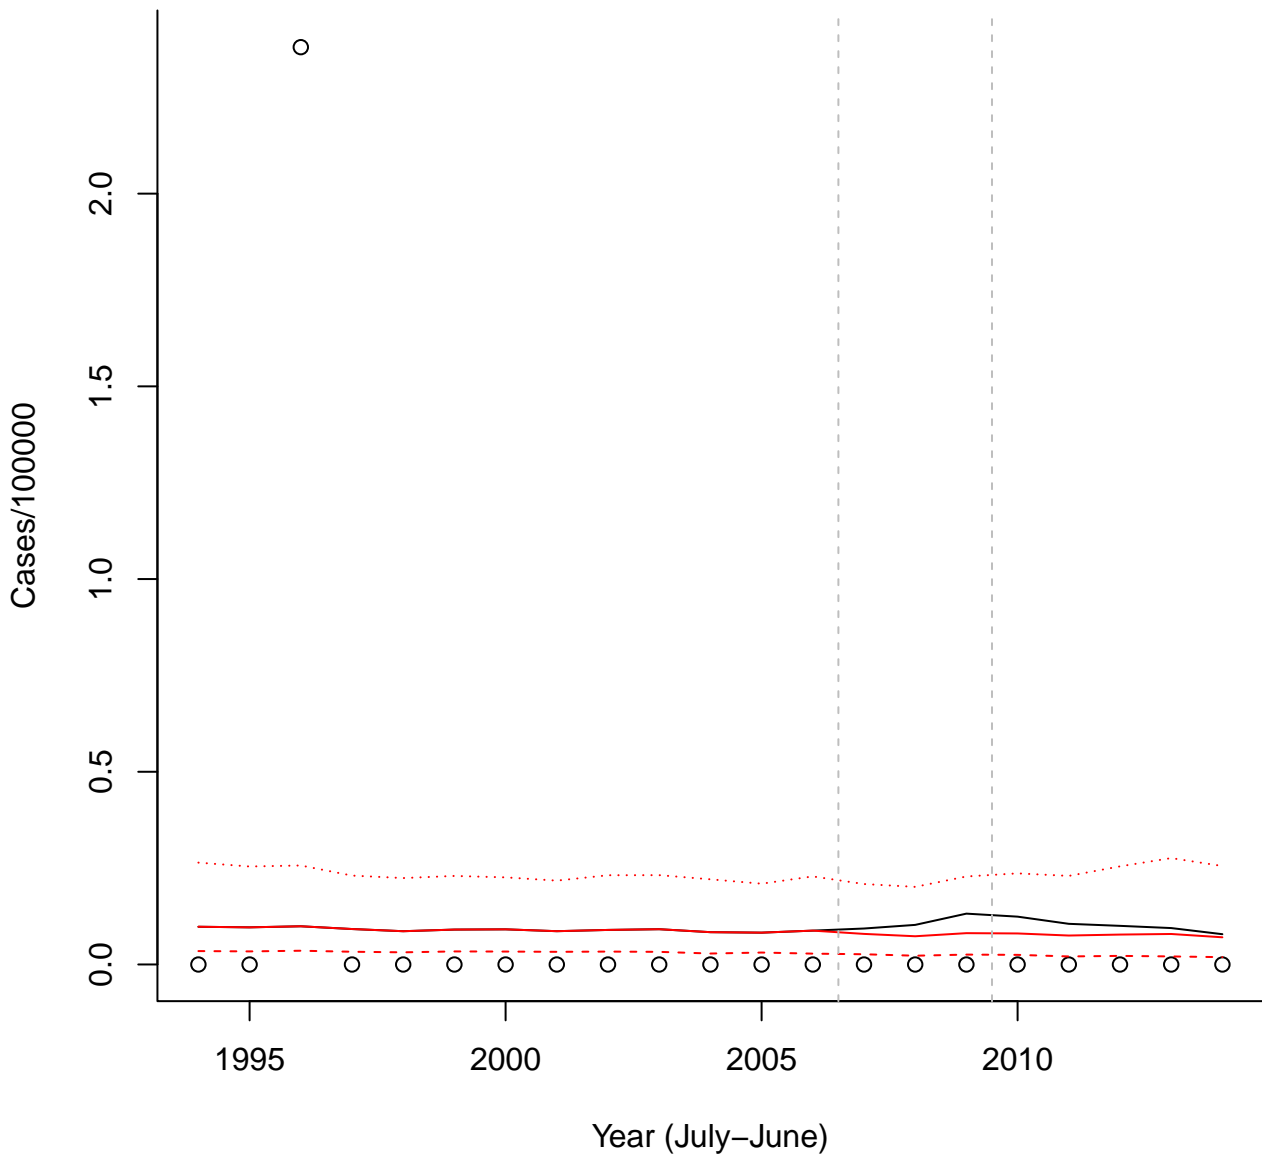

# 18–39y With comorbidity Serotype 23B

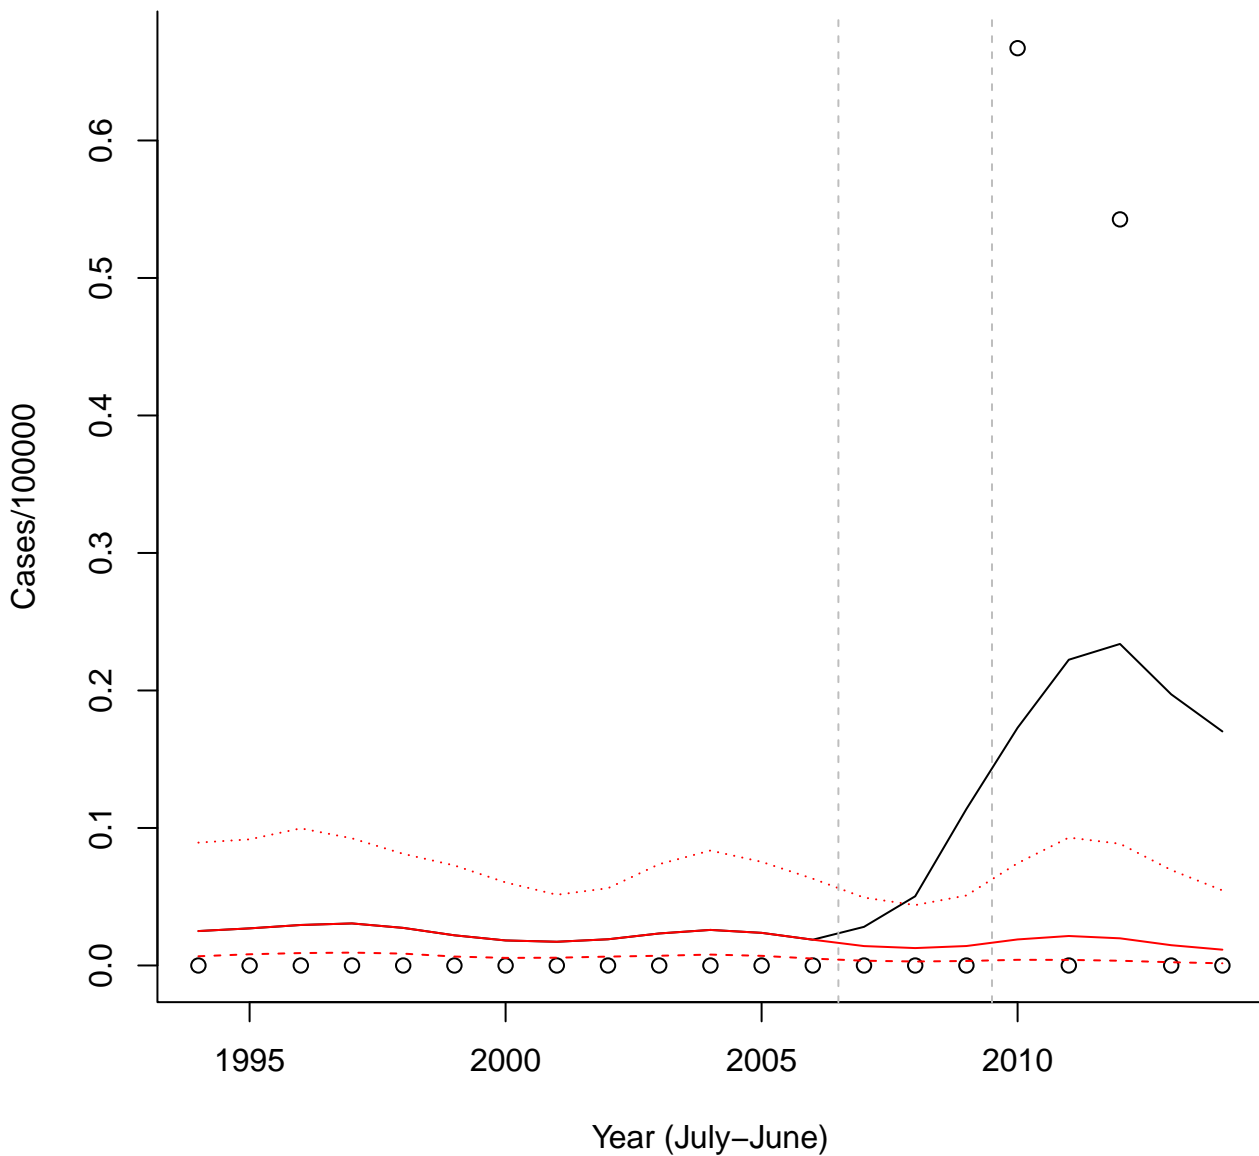

# 18–39y With comorbidity Serotype 23F

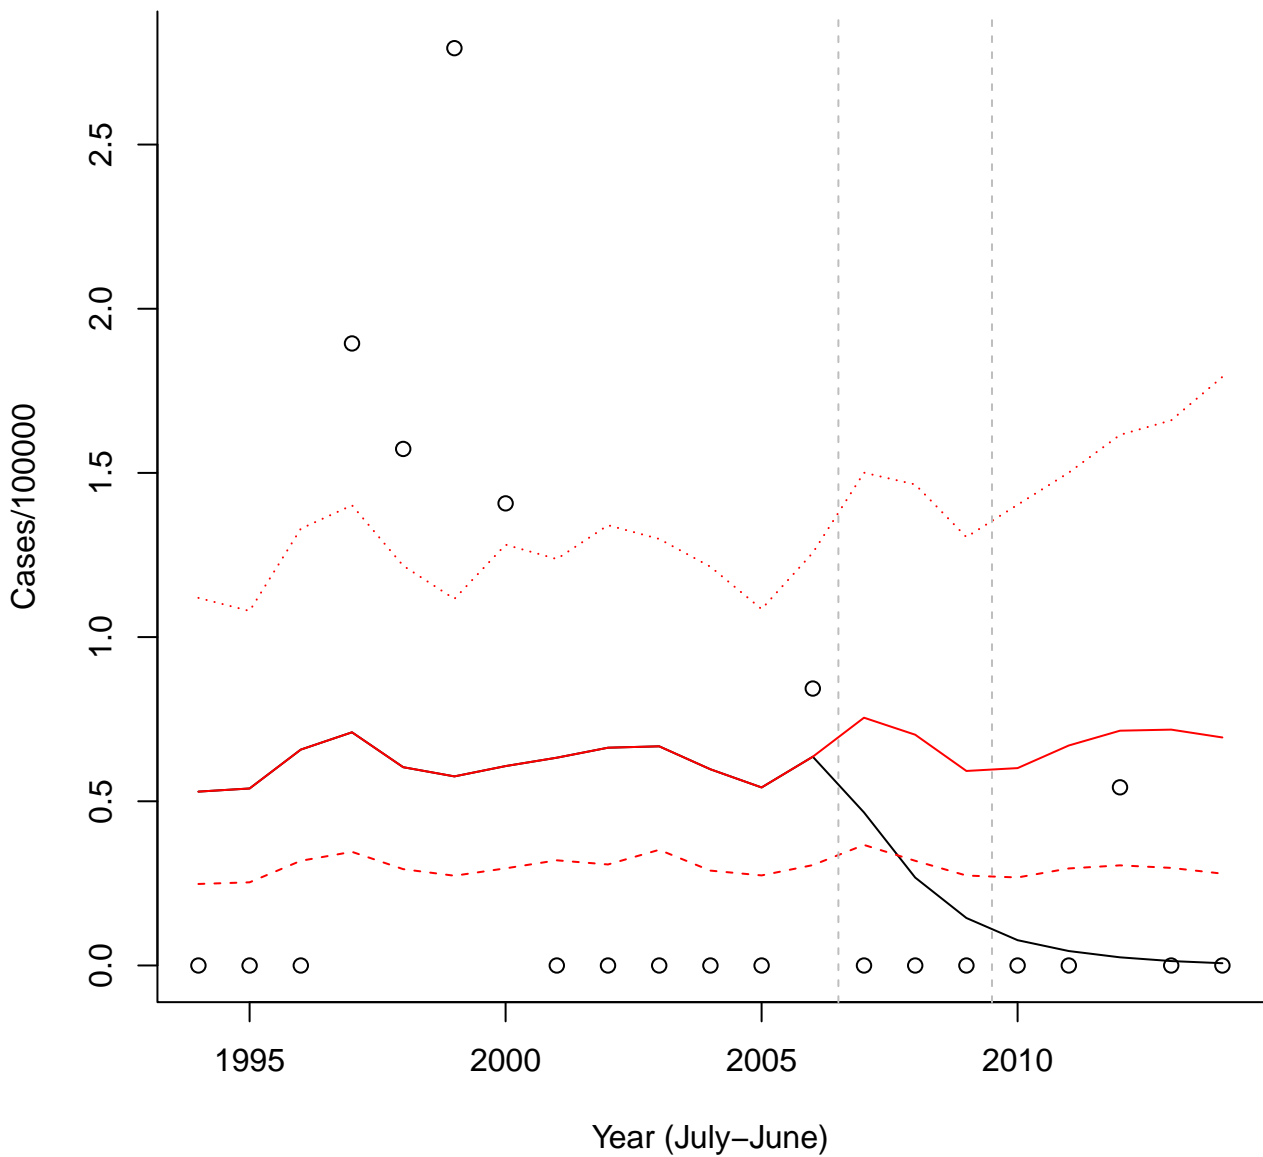

# 18–39y With comorbidity Serotype 24F

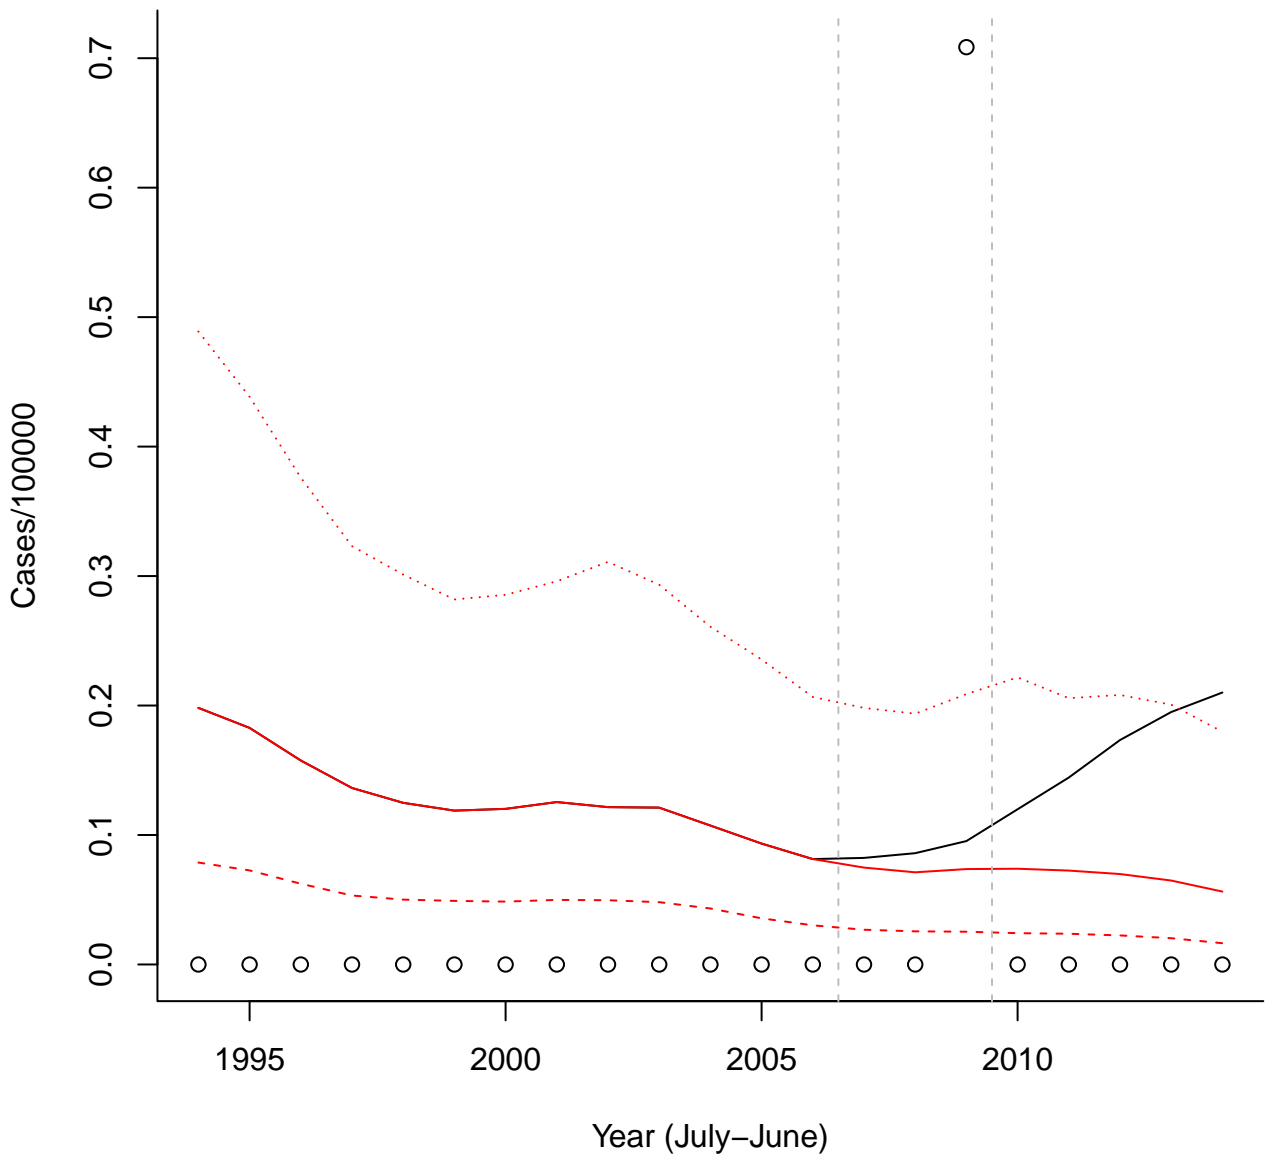

# 18–39y With comorbidity Serotype 3

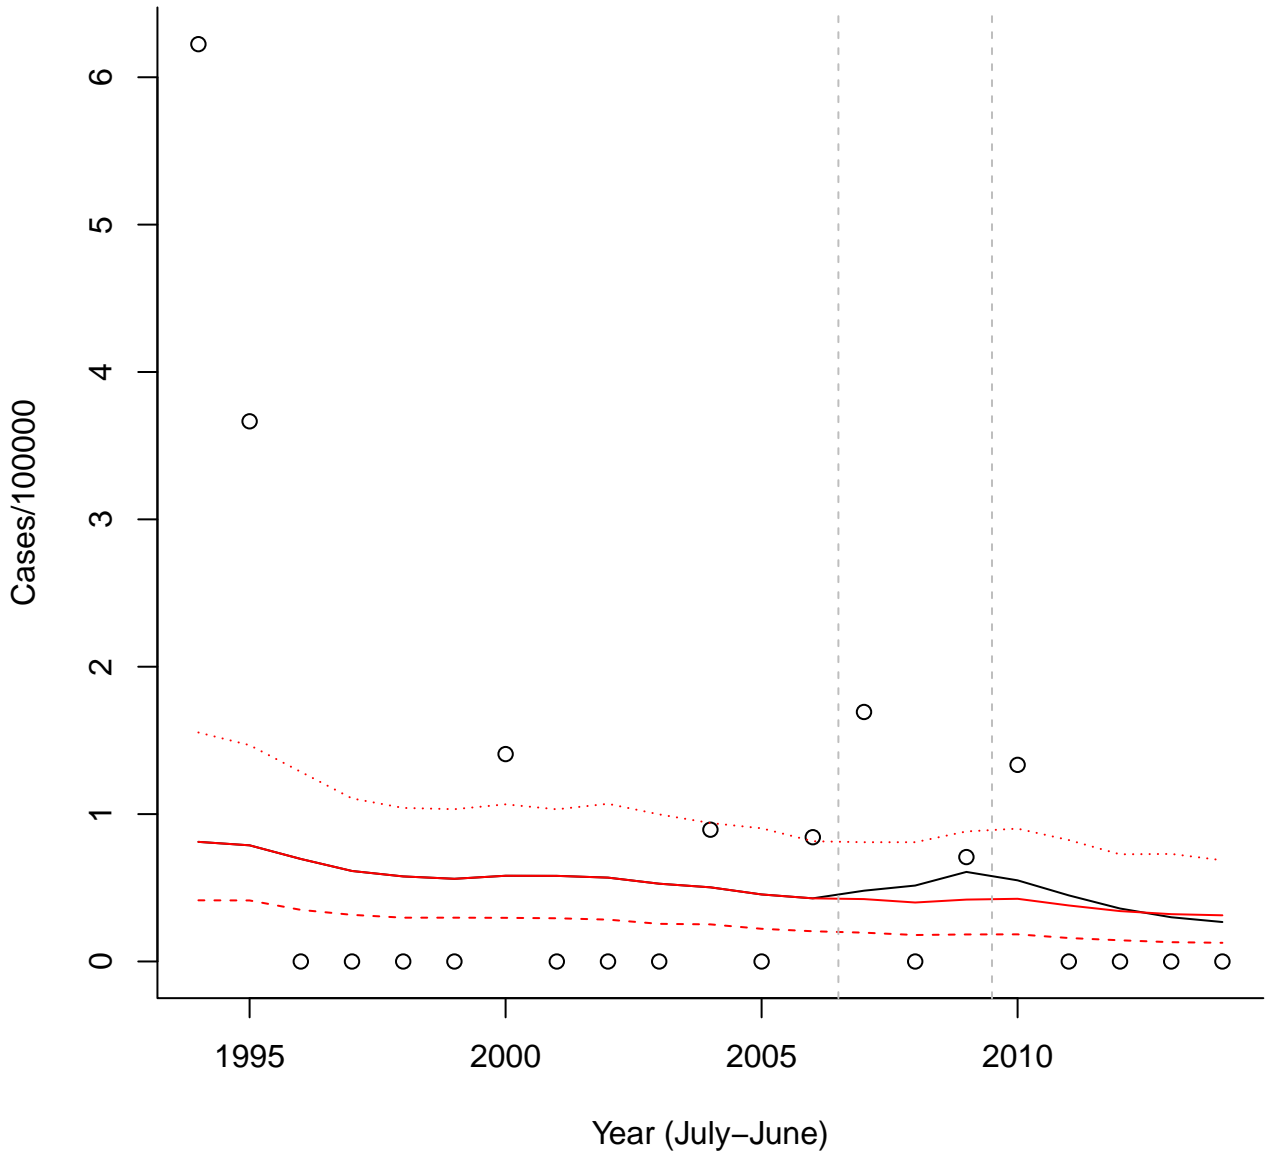

# 18–39y With comorbidity Serotype 31

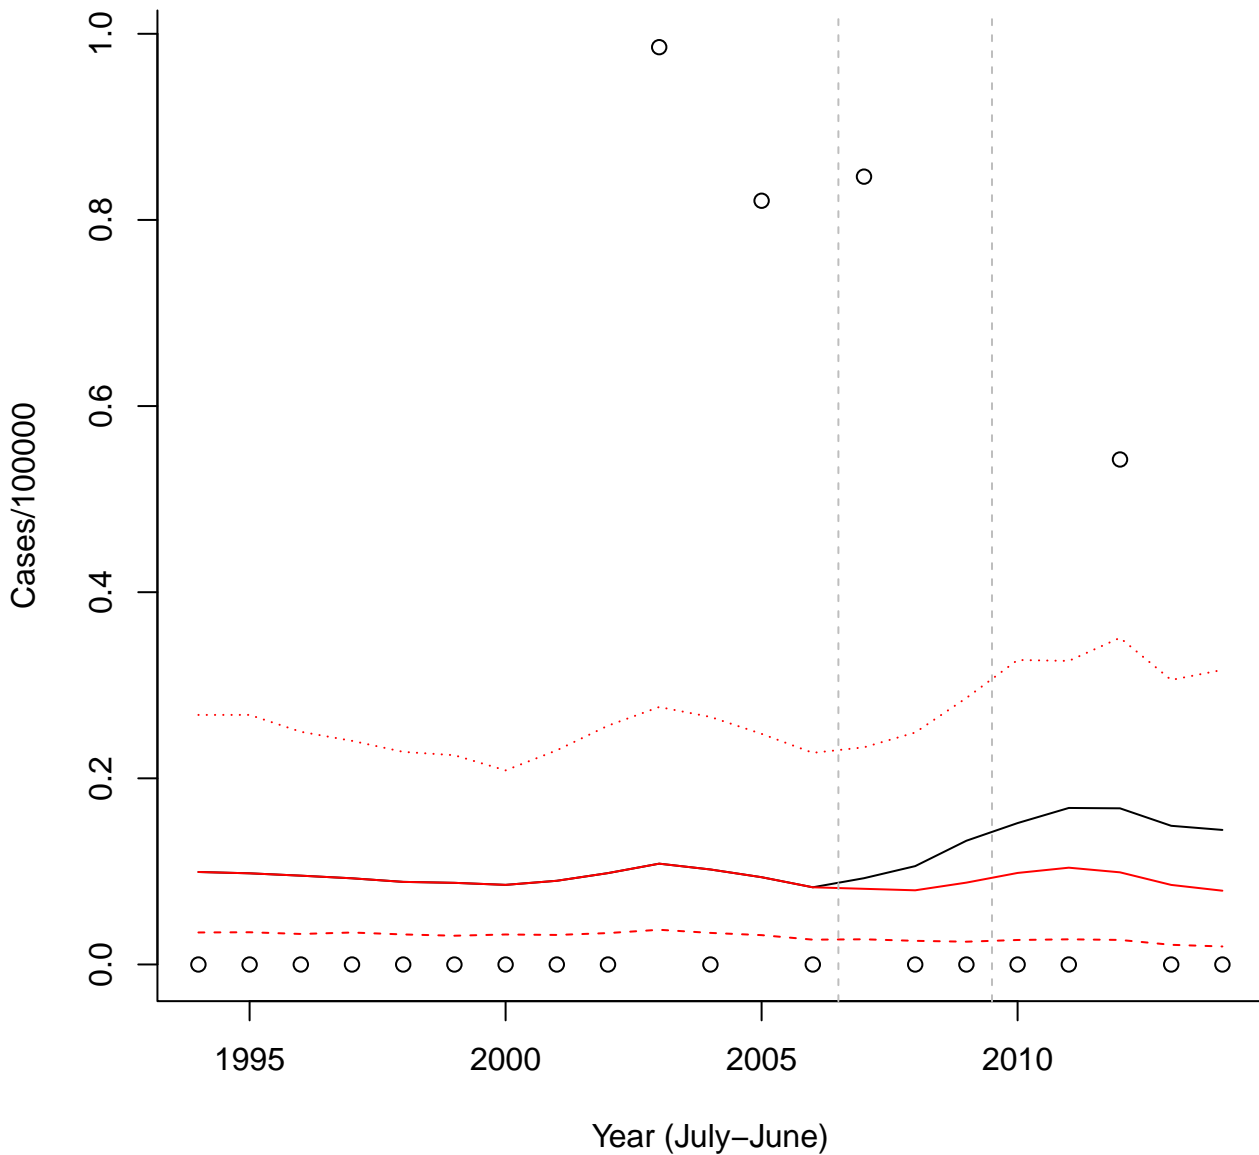



# 18–39y With comorbidity Serotype 32F

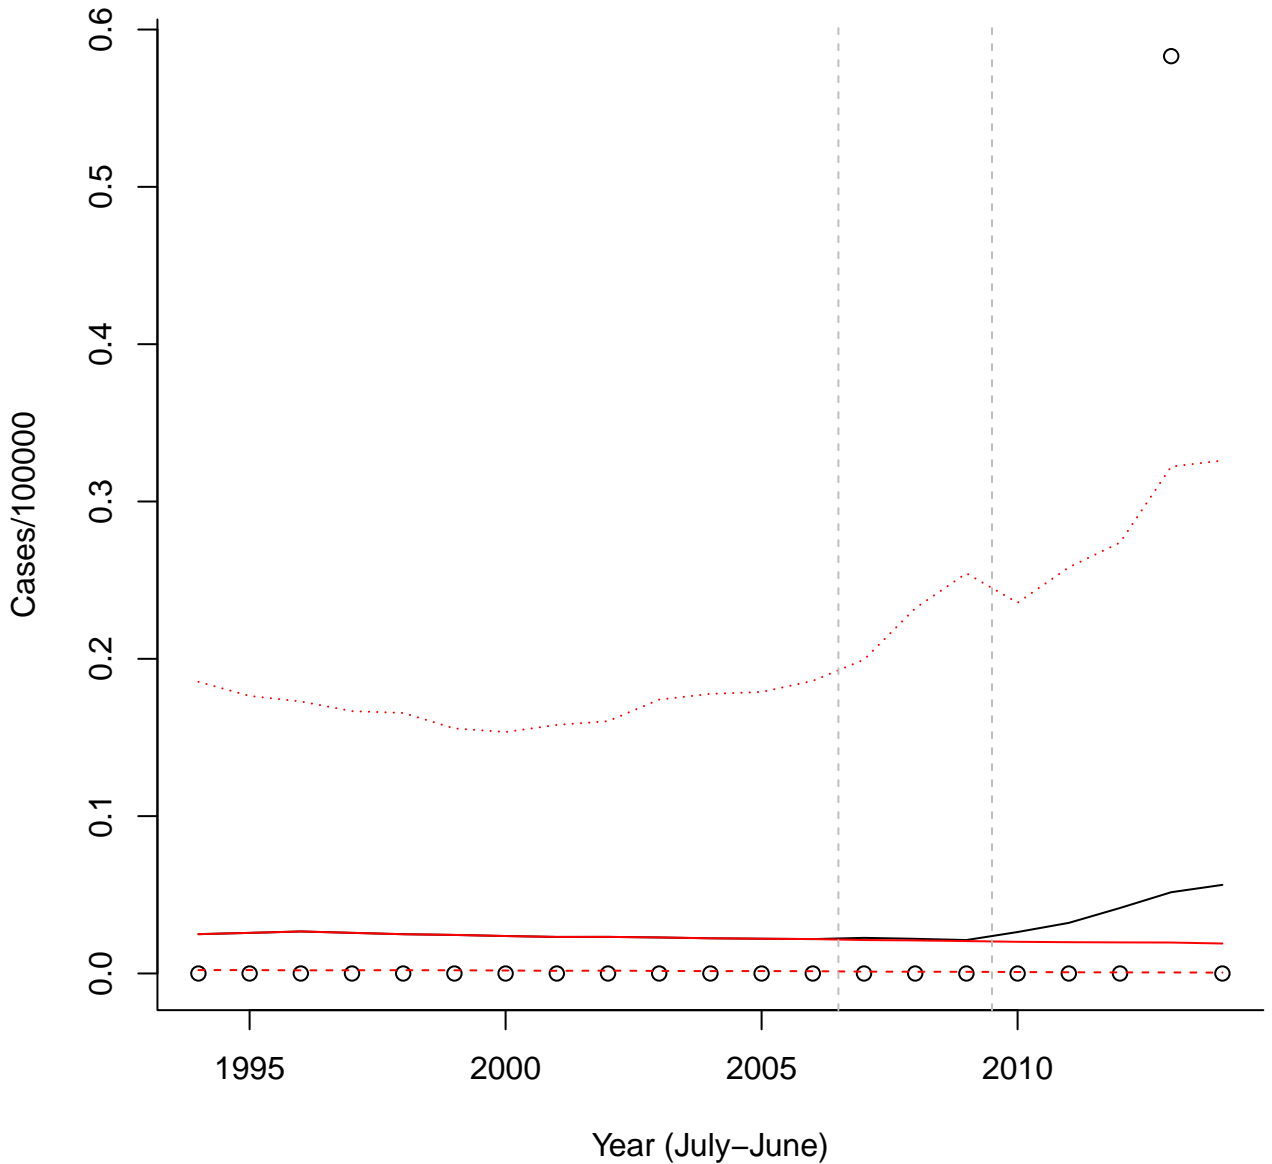

# 18–39y With comorbidity Serotype 33F

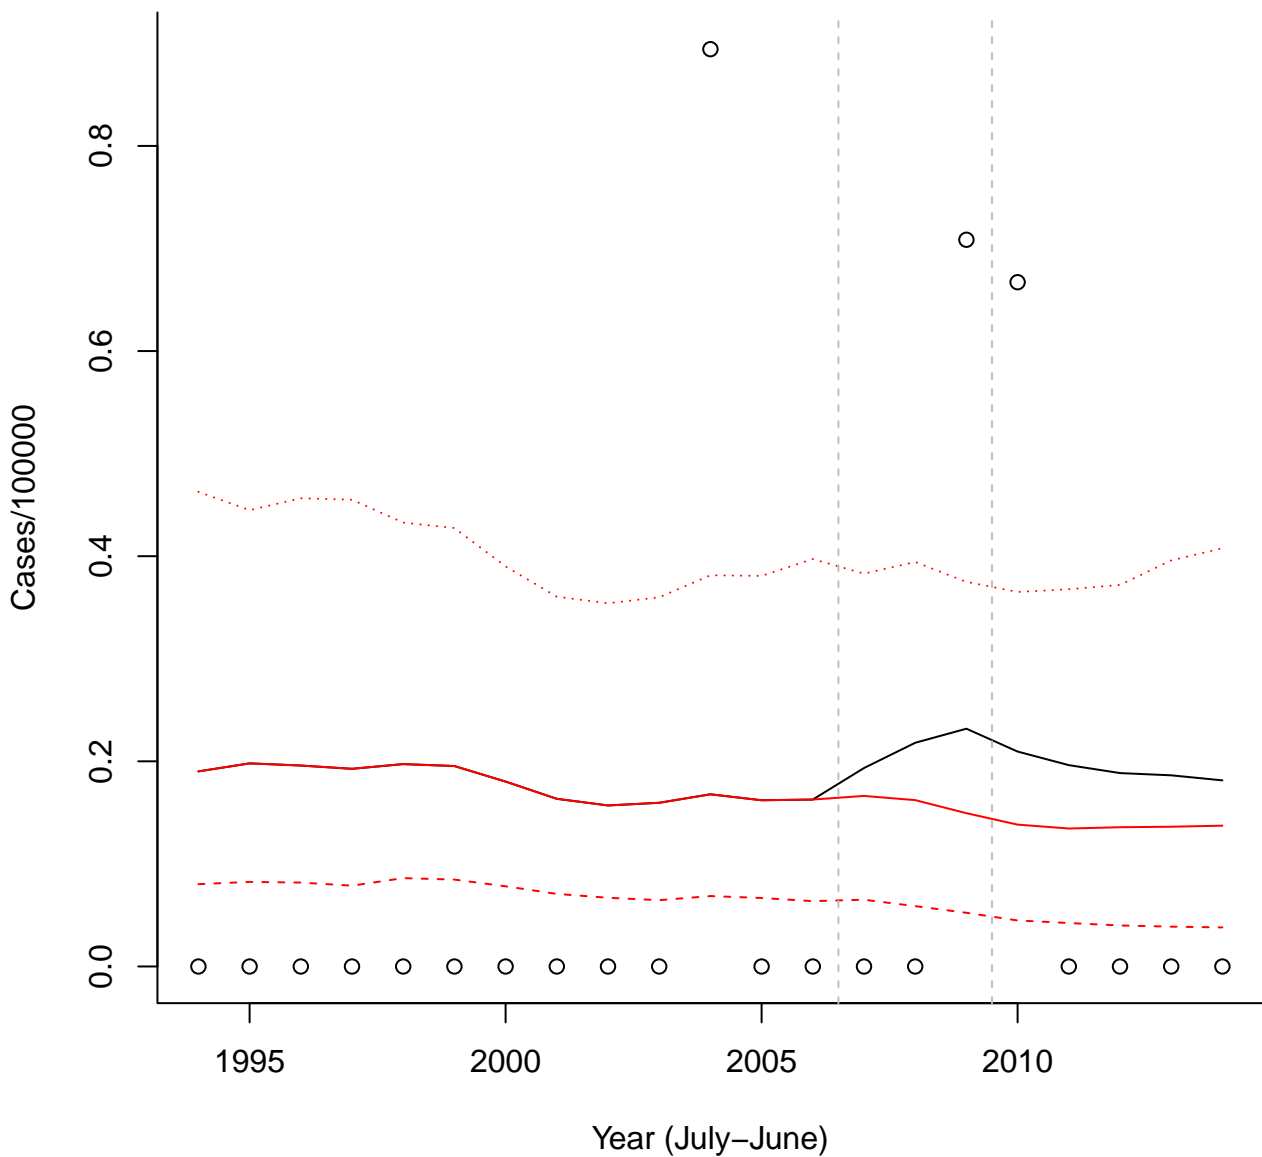

# 18–39y With comorbidity Serotype 34

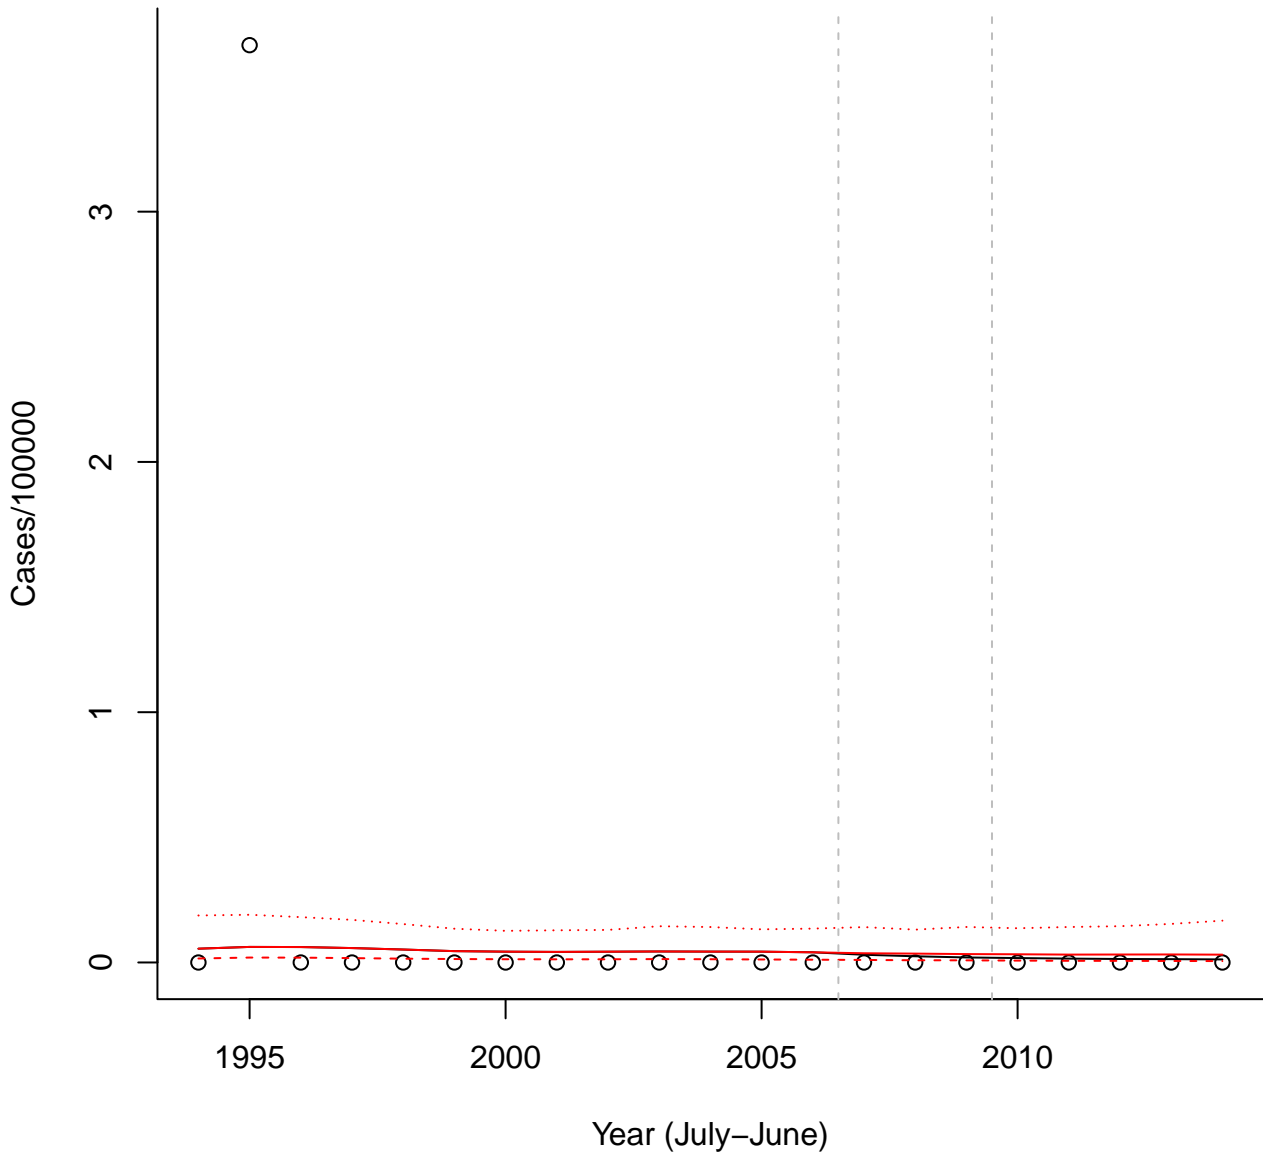

# 18–39y With comorbidity Serotype 35B

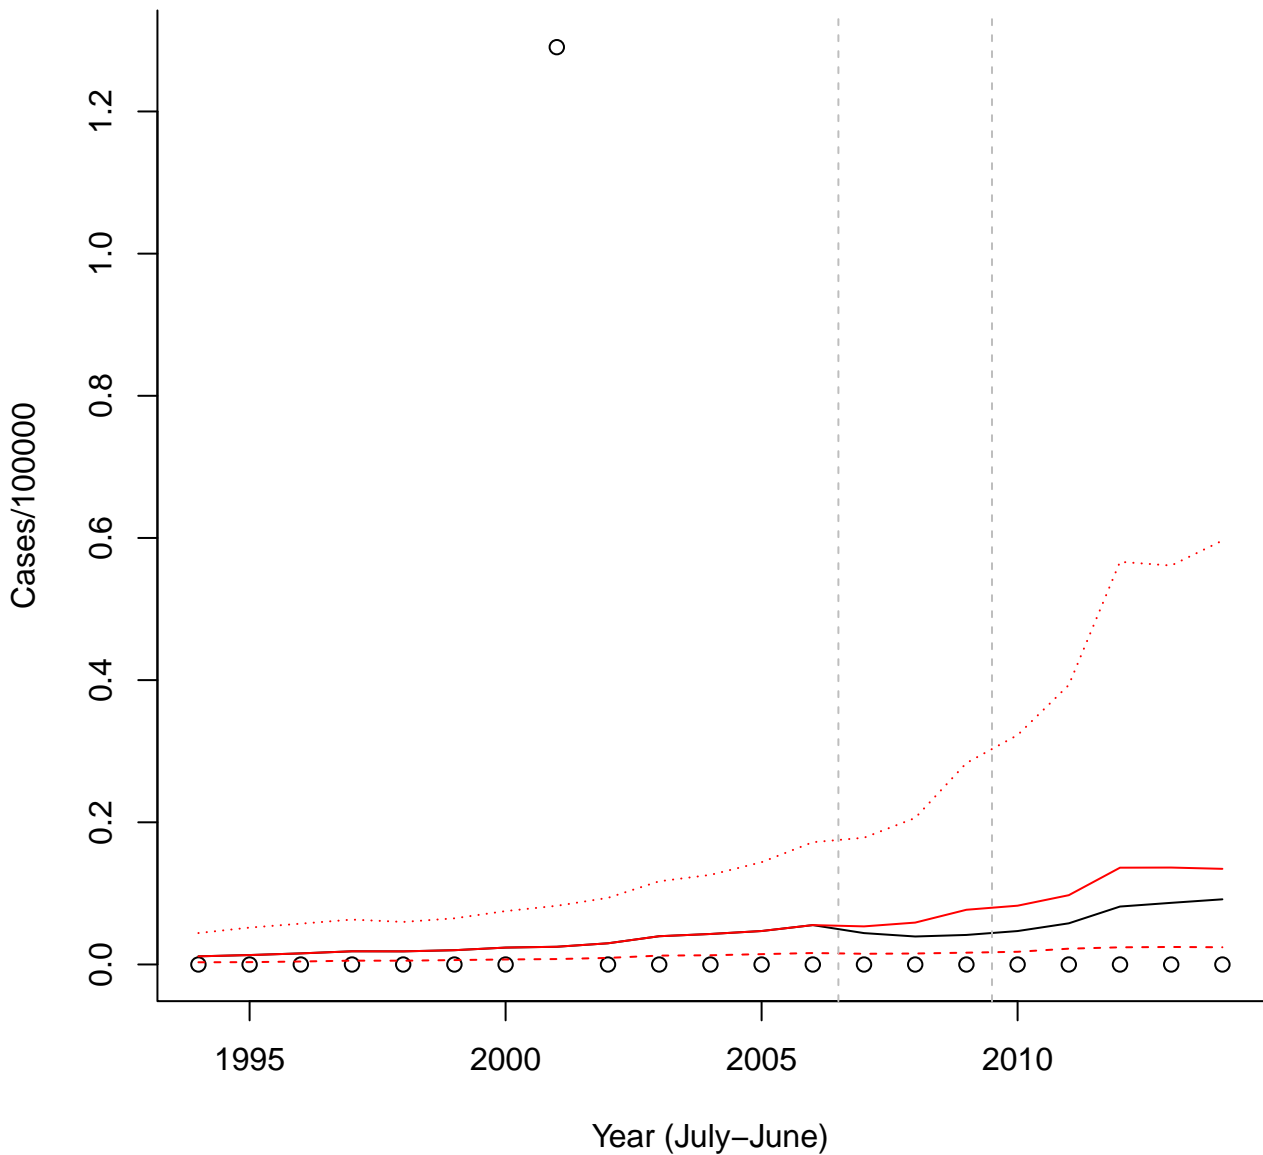

# 18–39y With comorbidity Serotype 35F

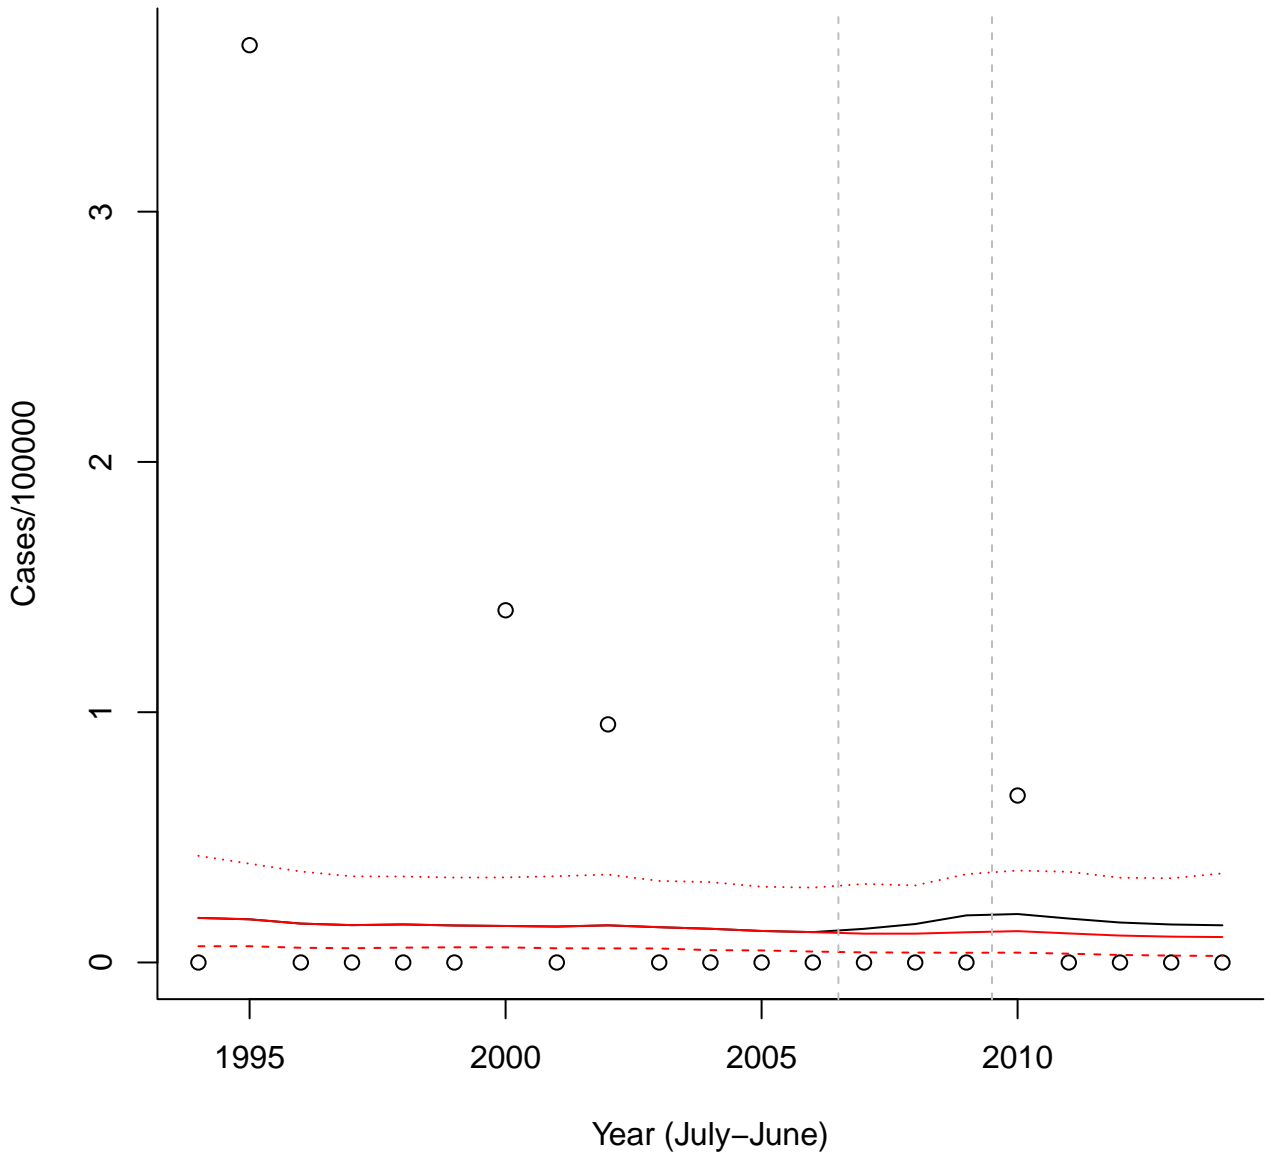

# 18–39y With comorbidity Serotype 38

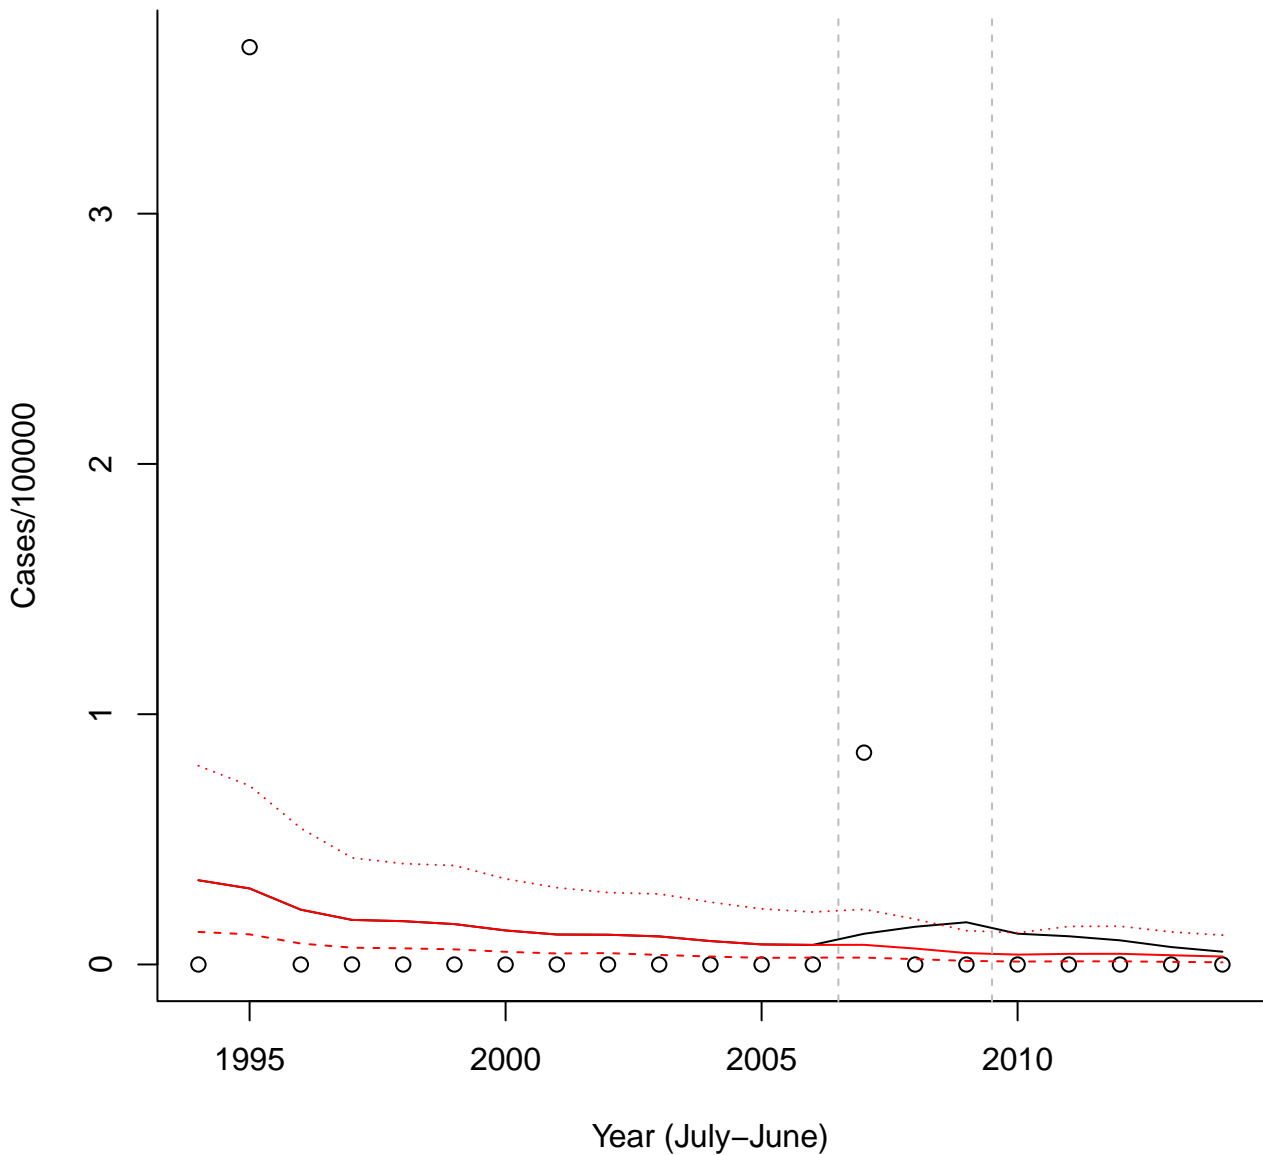

# 18–39y With comorbidity Serotype 4

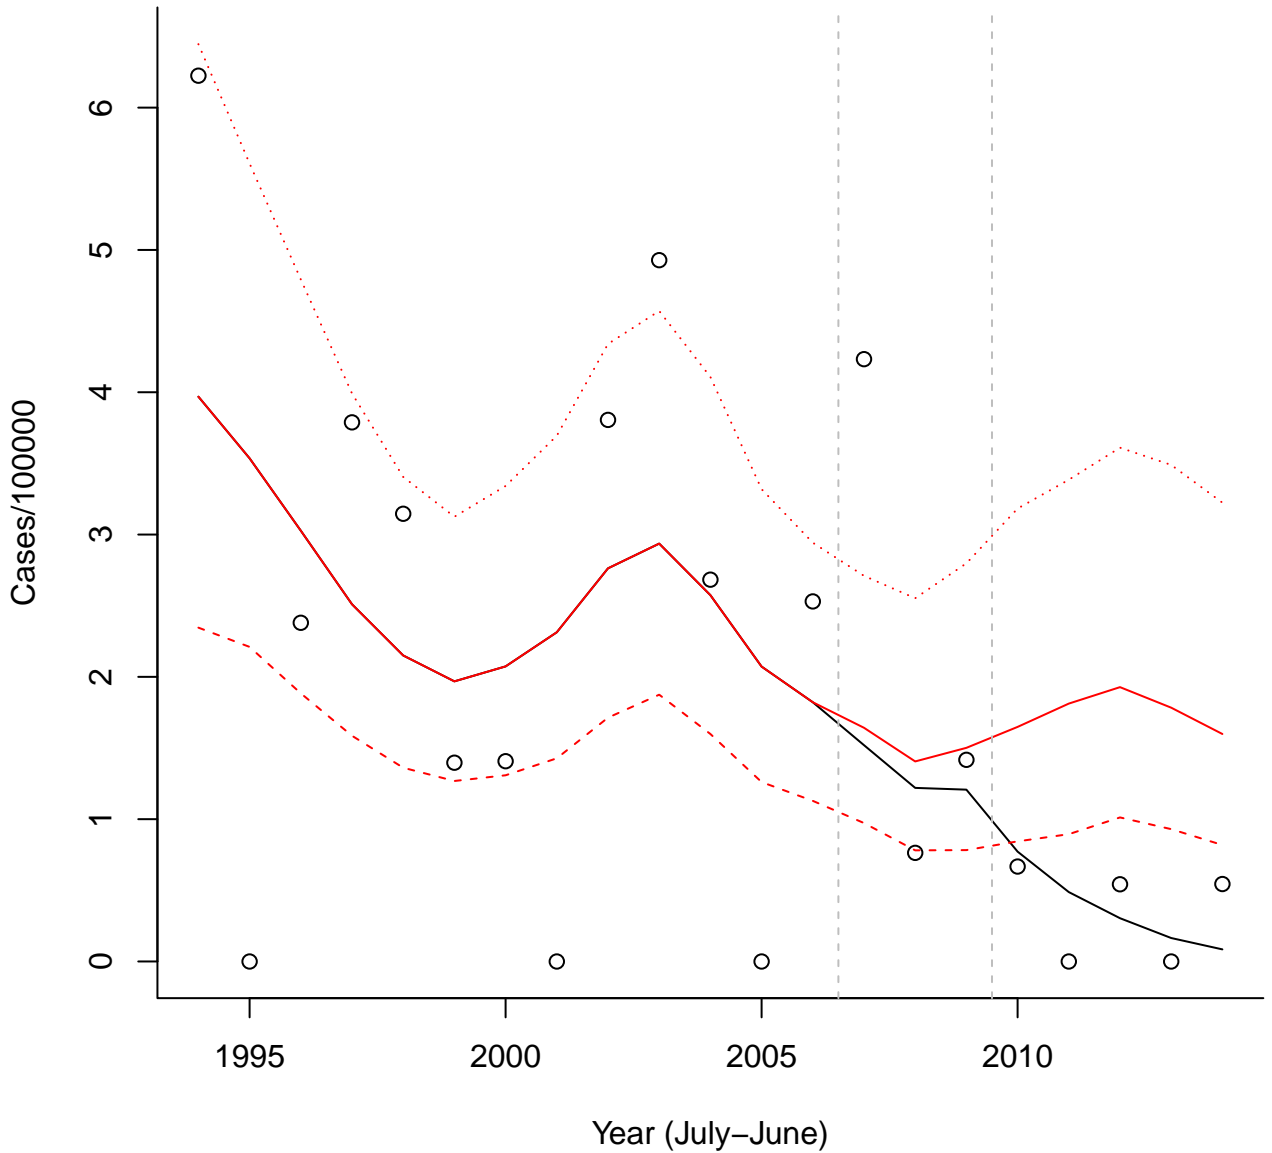

# 18–39y With comorbidity Serotype 48

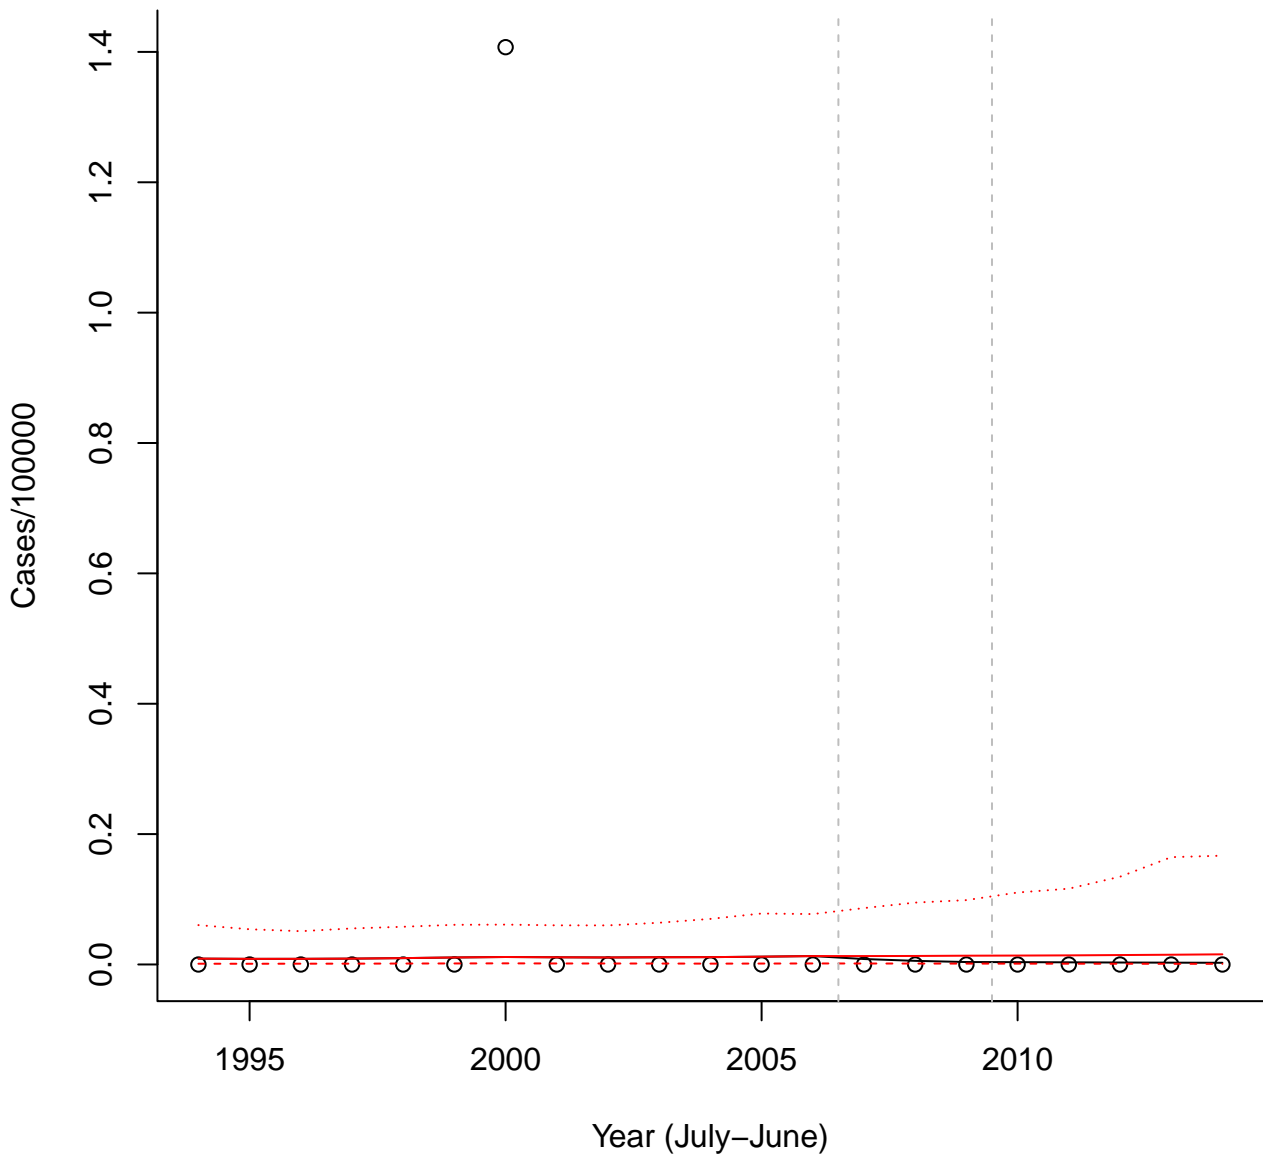



# 18–39y With comorbidity Serotype 5

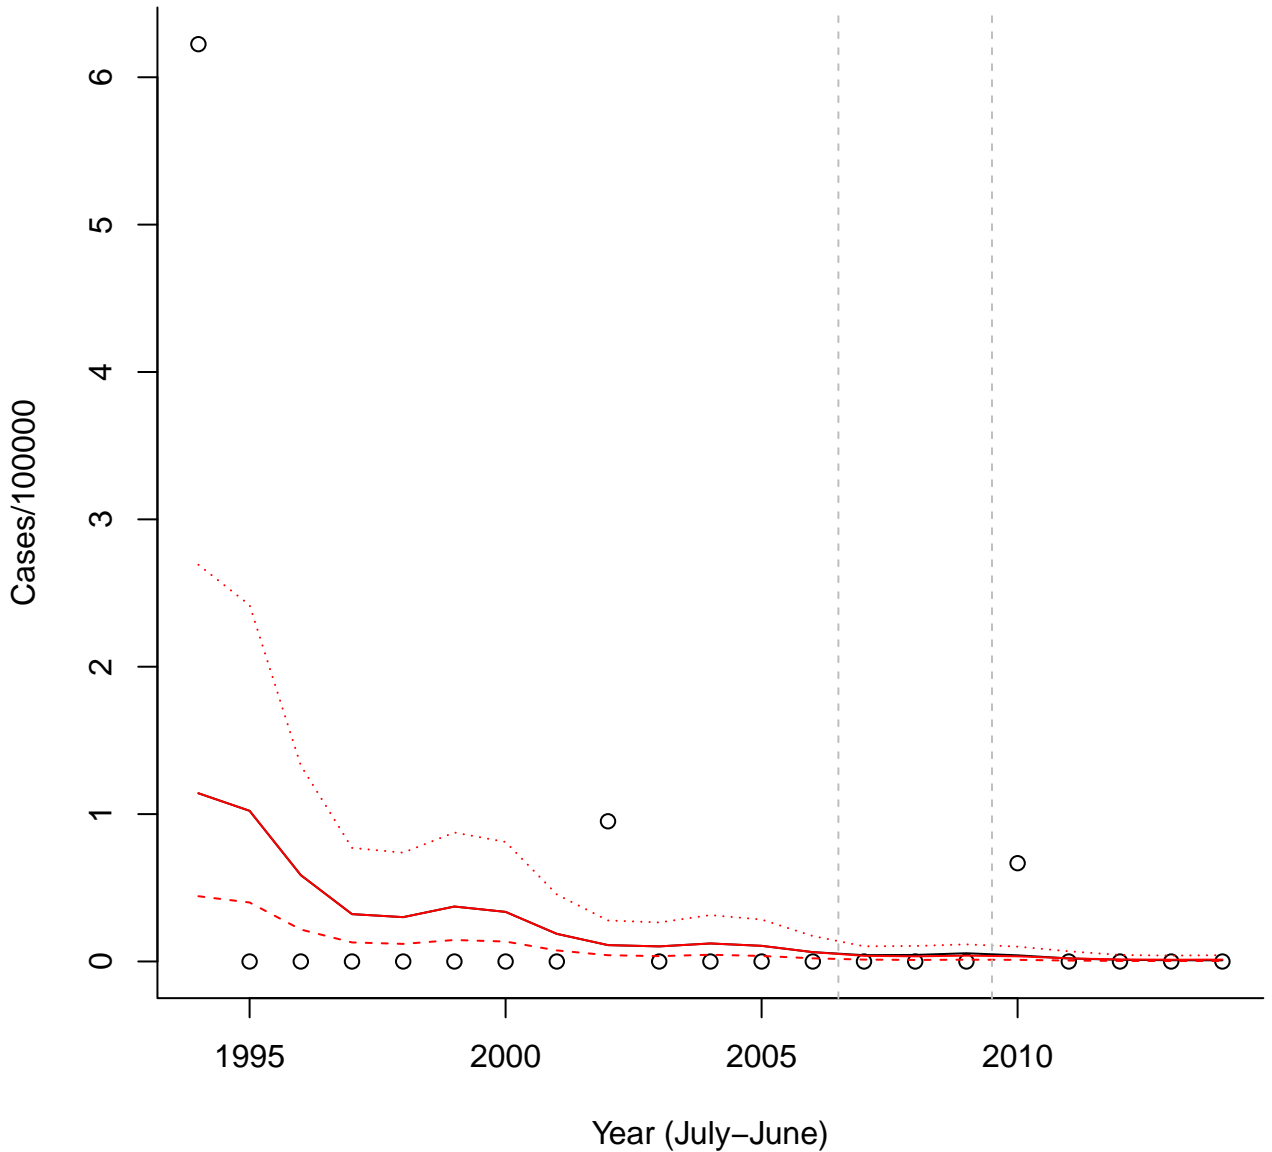

# 18–39y With comorbidity Serotype 6A

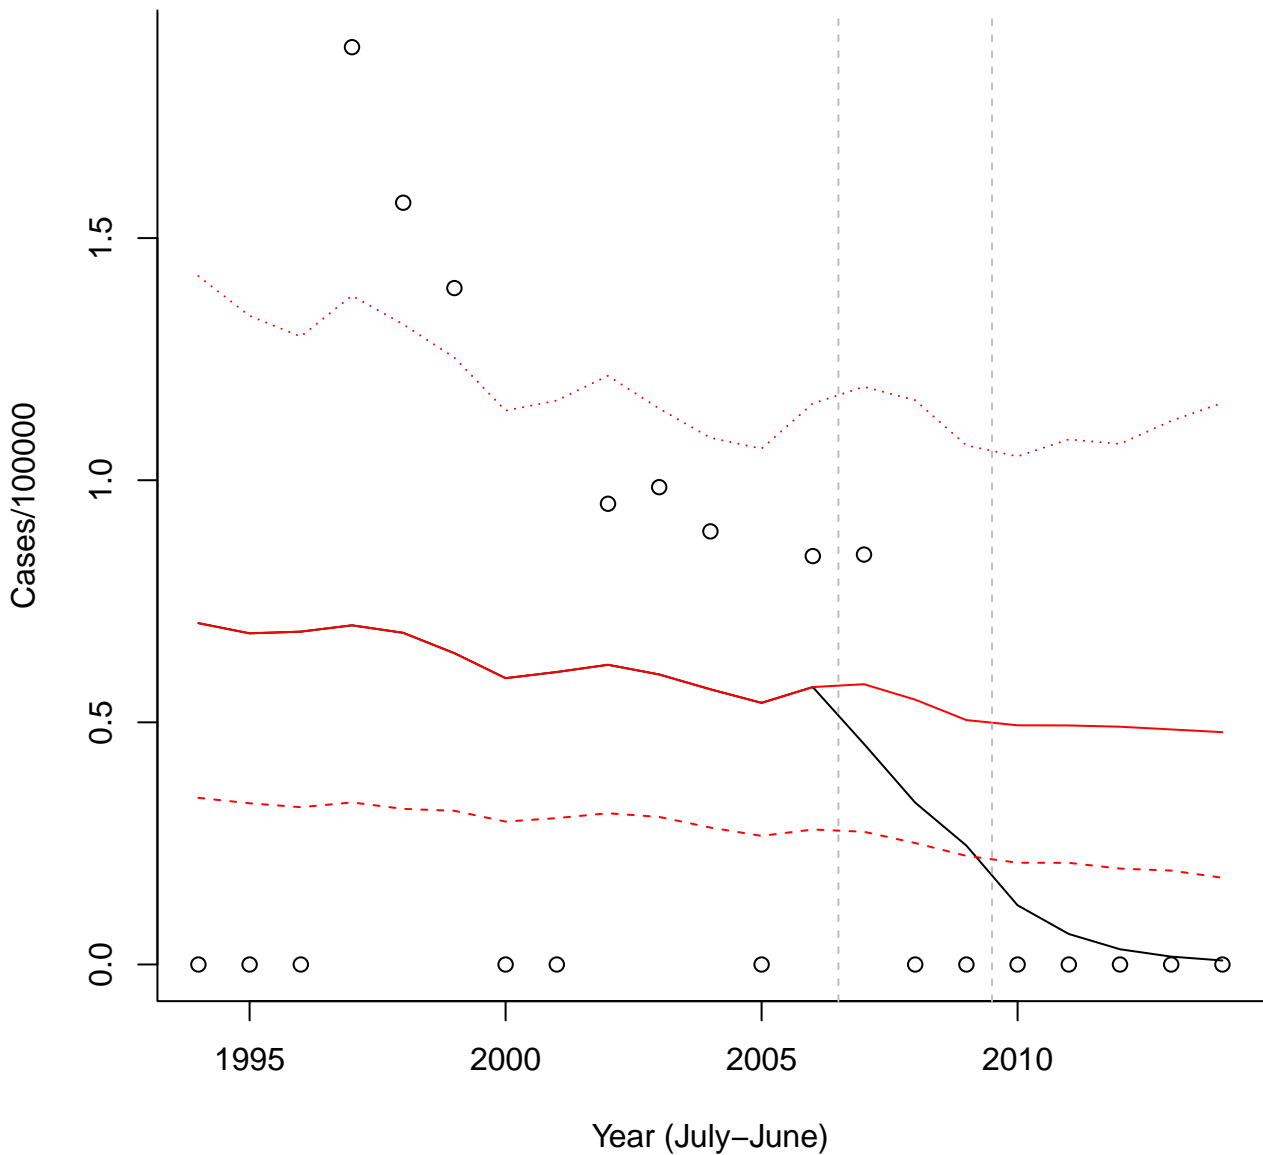

# 18–39y With comorbidity Serotype 6B

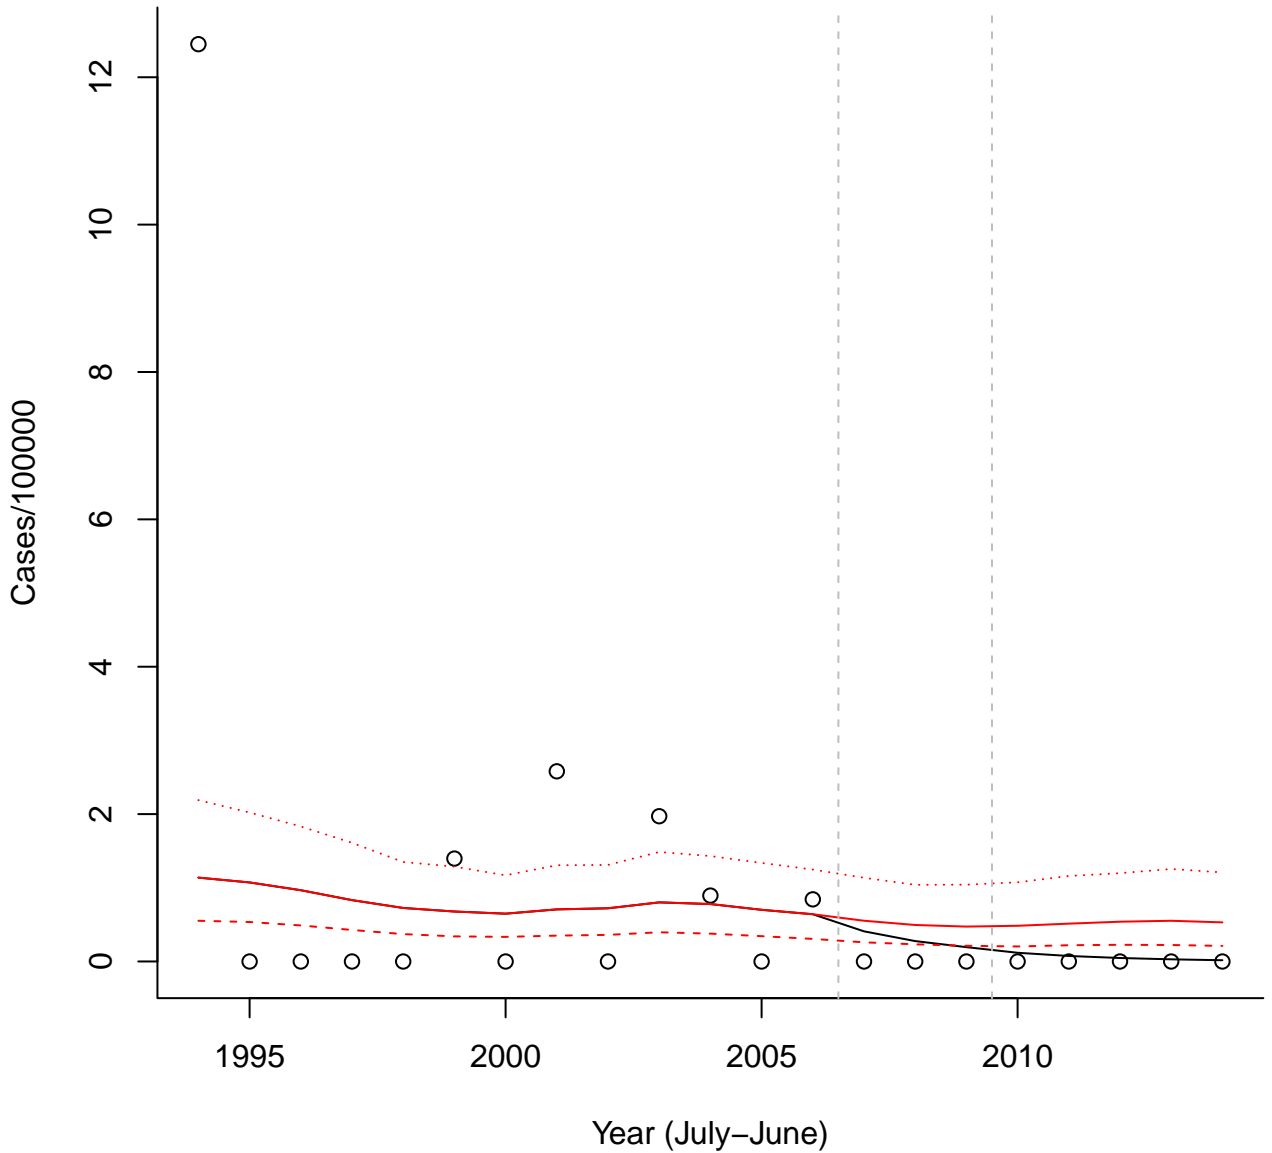

# 18–39y With comorbidity Serotype 6C

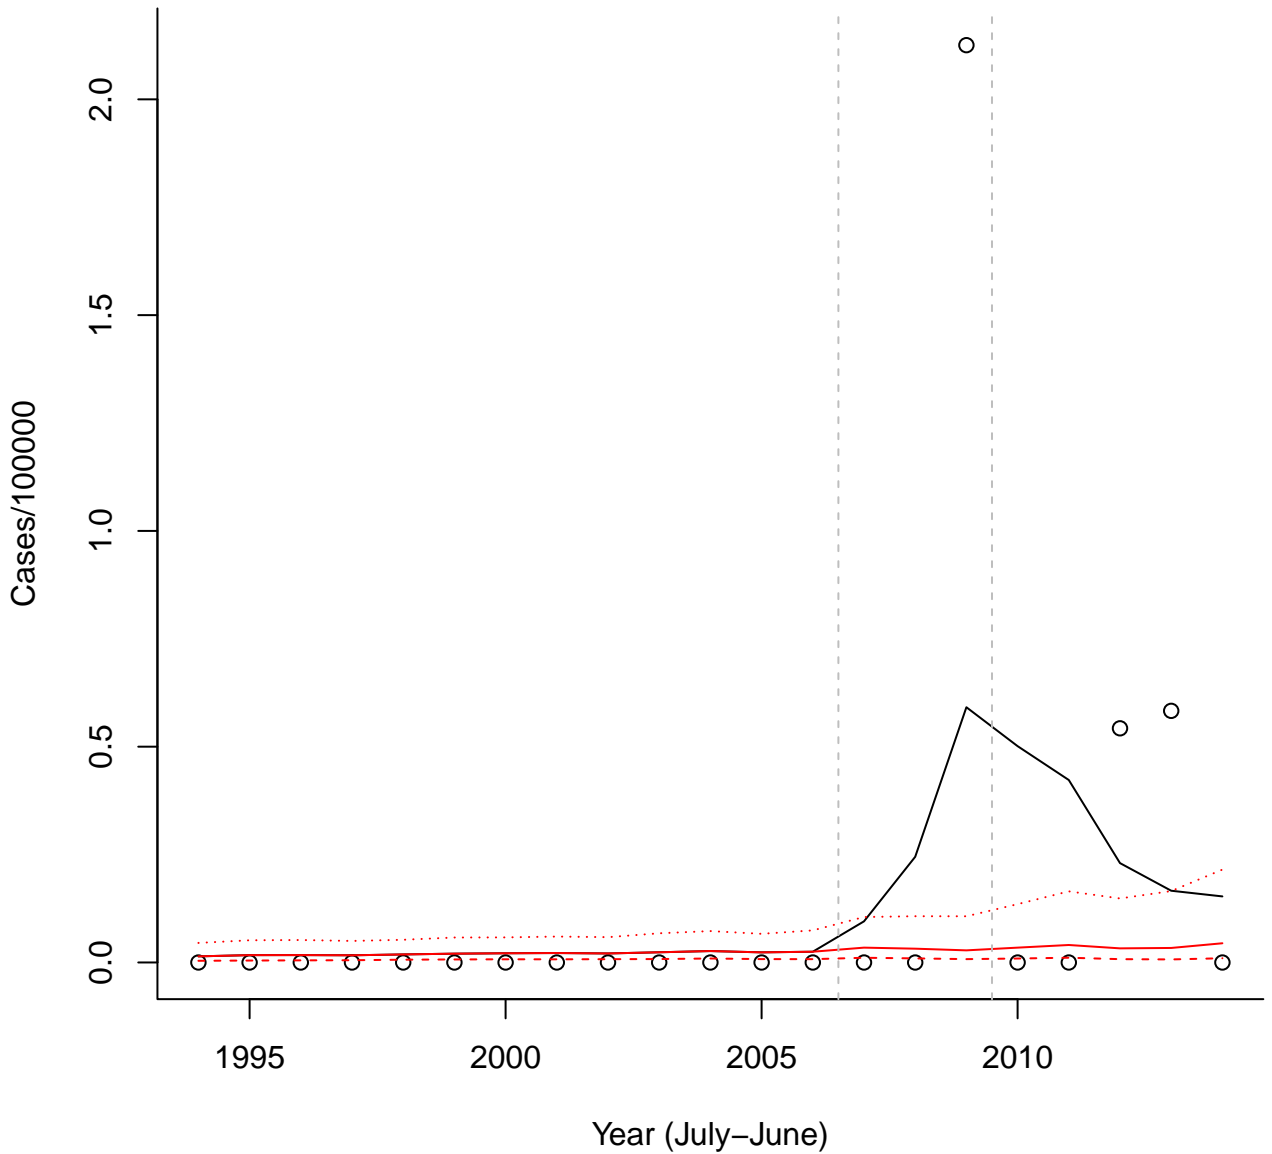

# 18–39y With comorbidity Serotype 7F

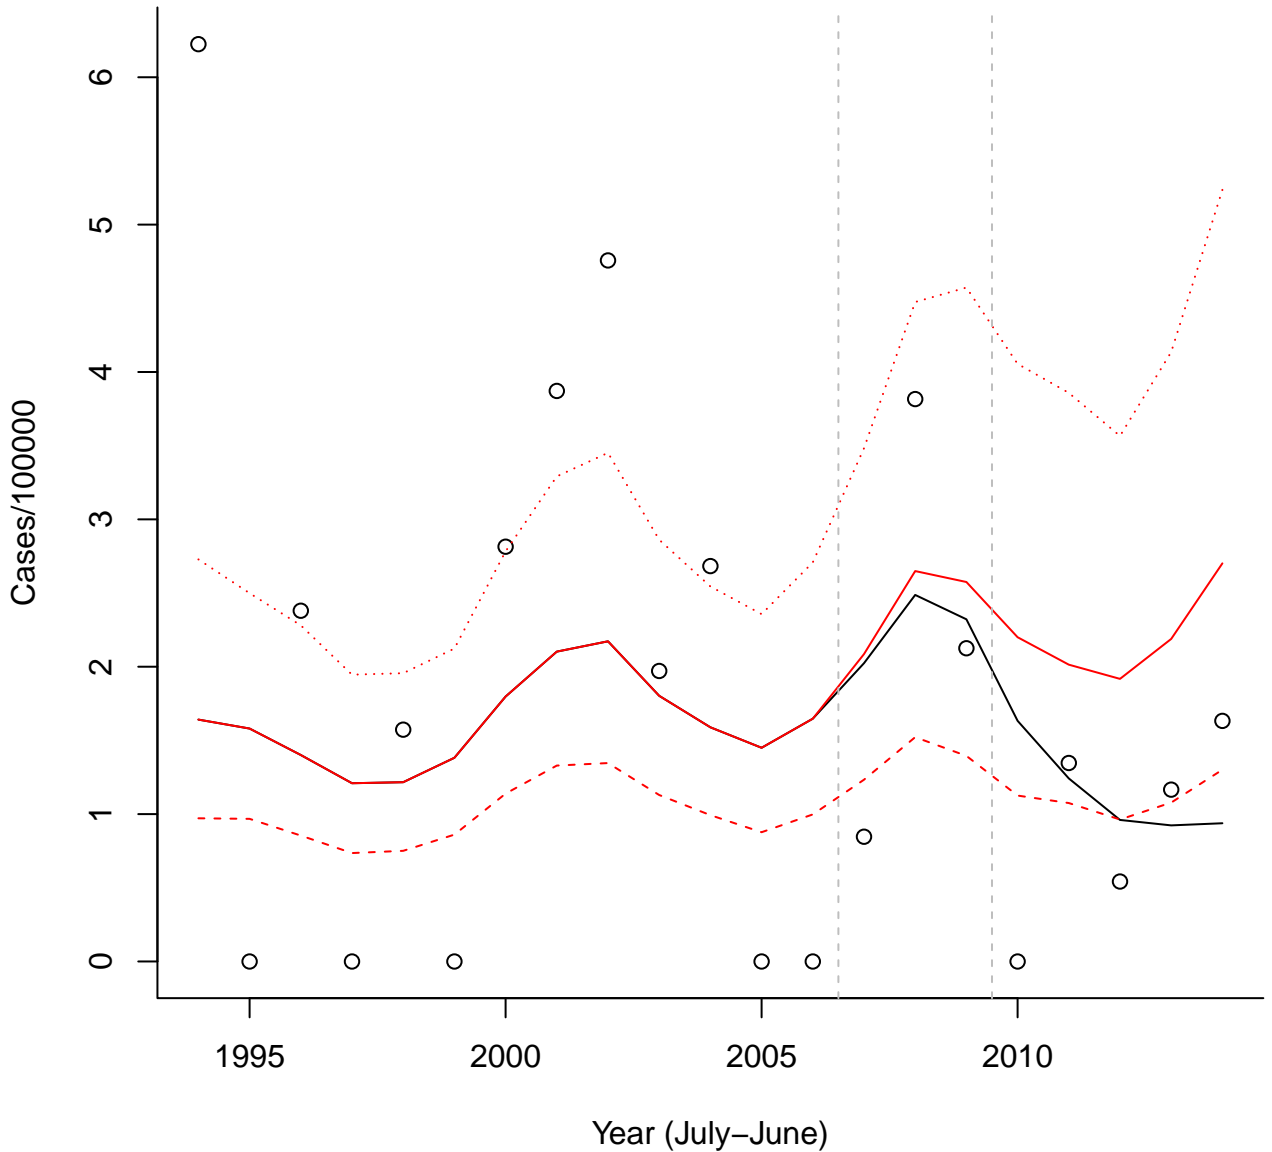

# 18–39y With comorbidity Serotype 8

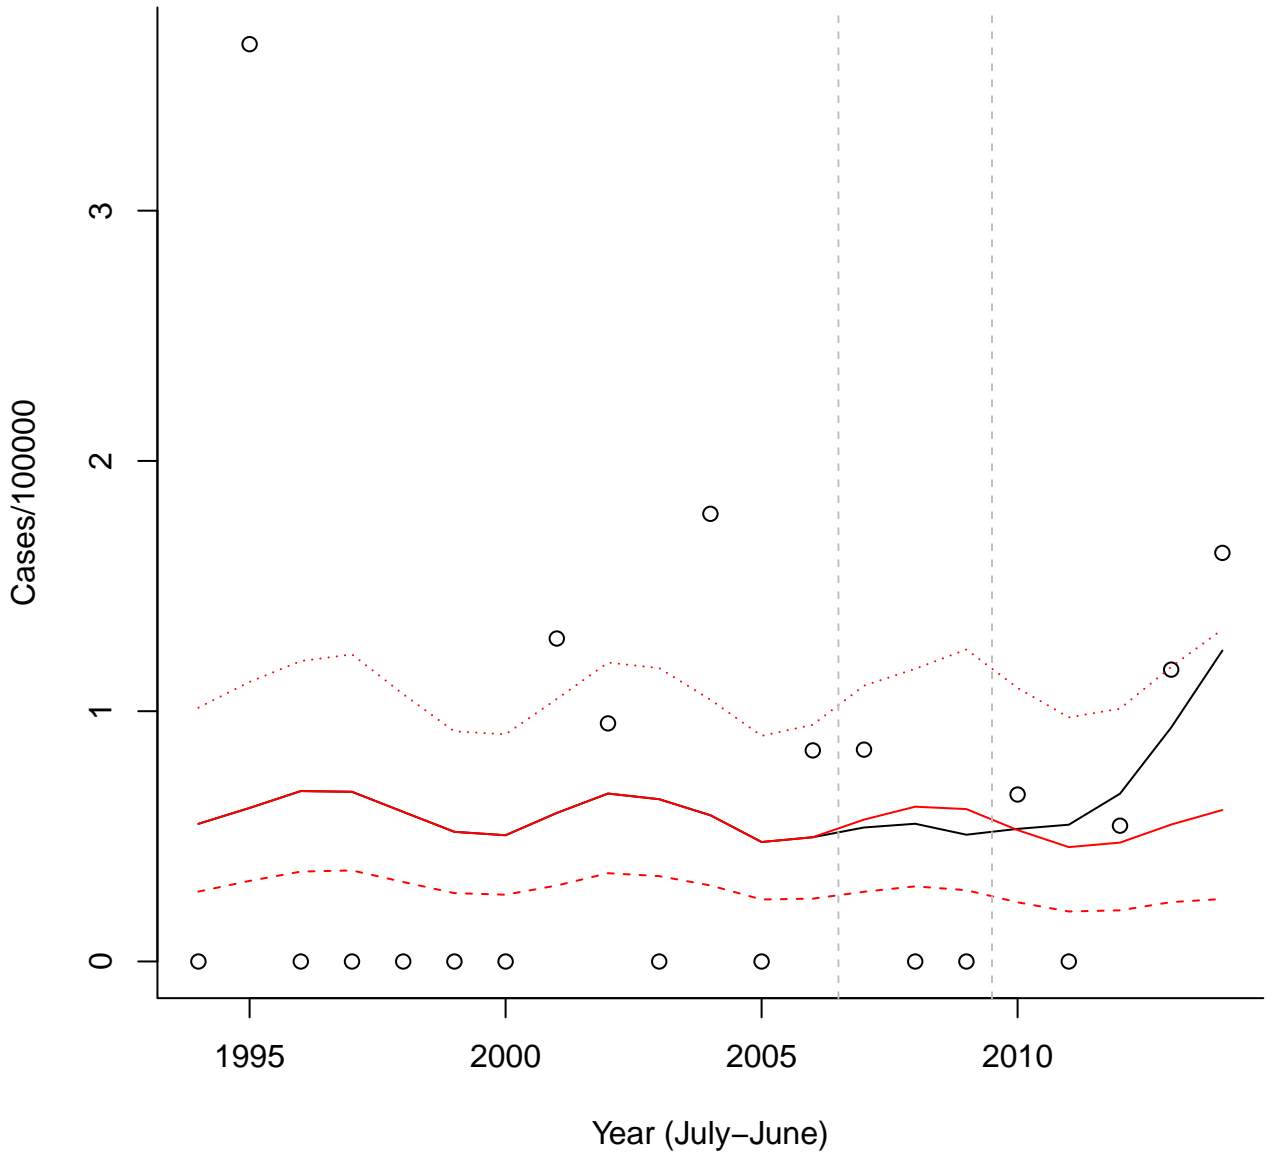

# 18–39y With comorbidity Serotype 9N

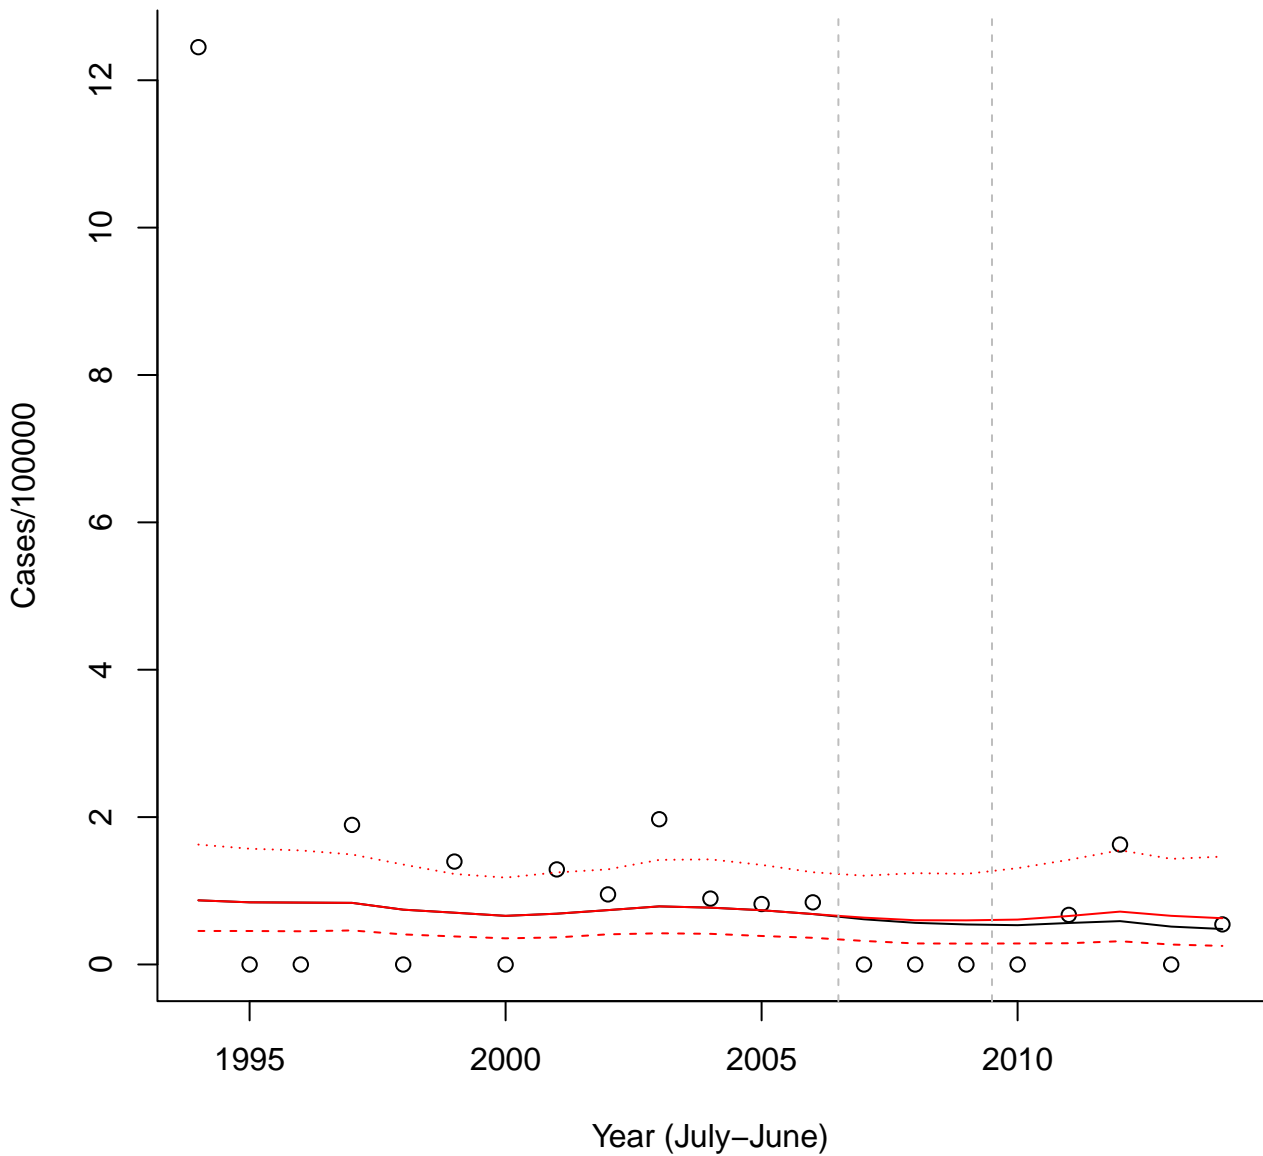

# 18–39y With comorbidity Serotype 9V

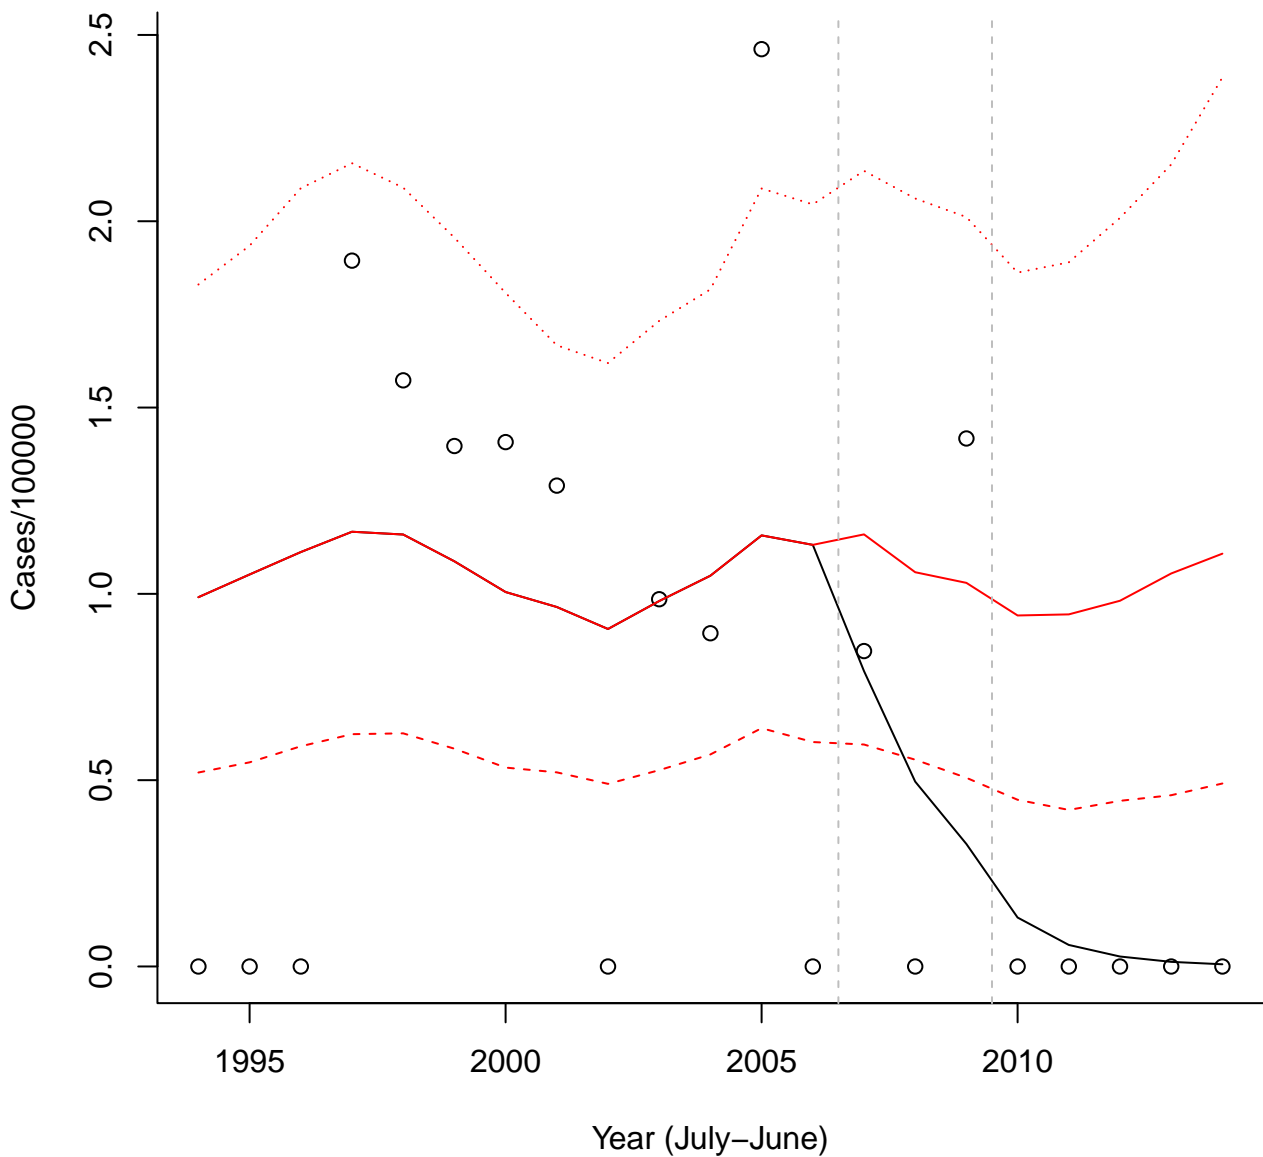



# 18-39y With comorbidity Serotype OT1

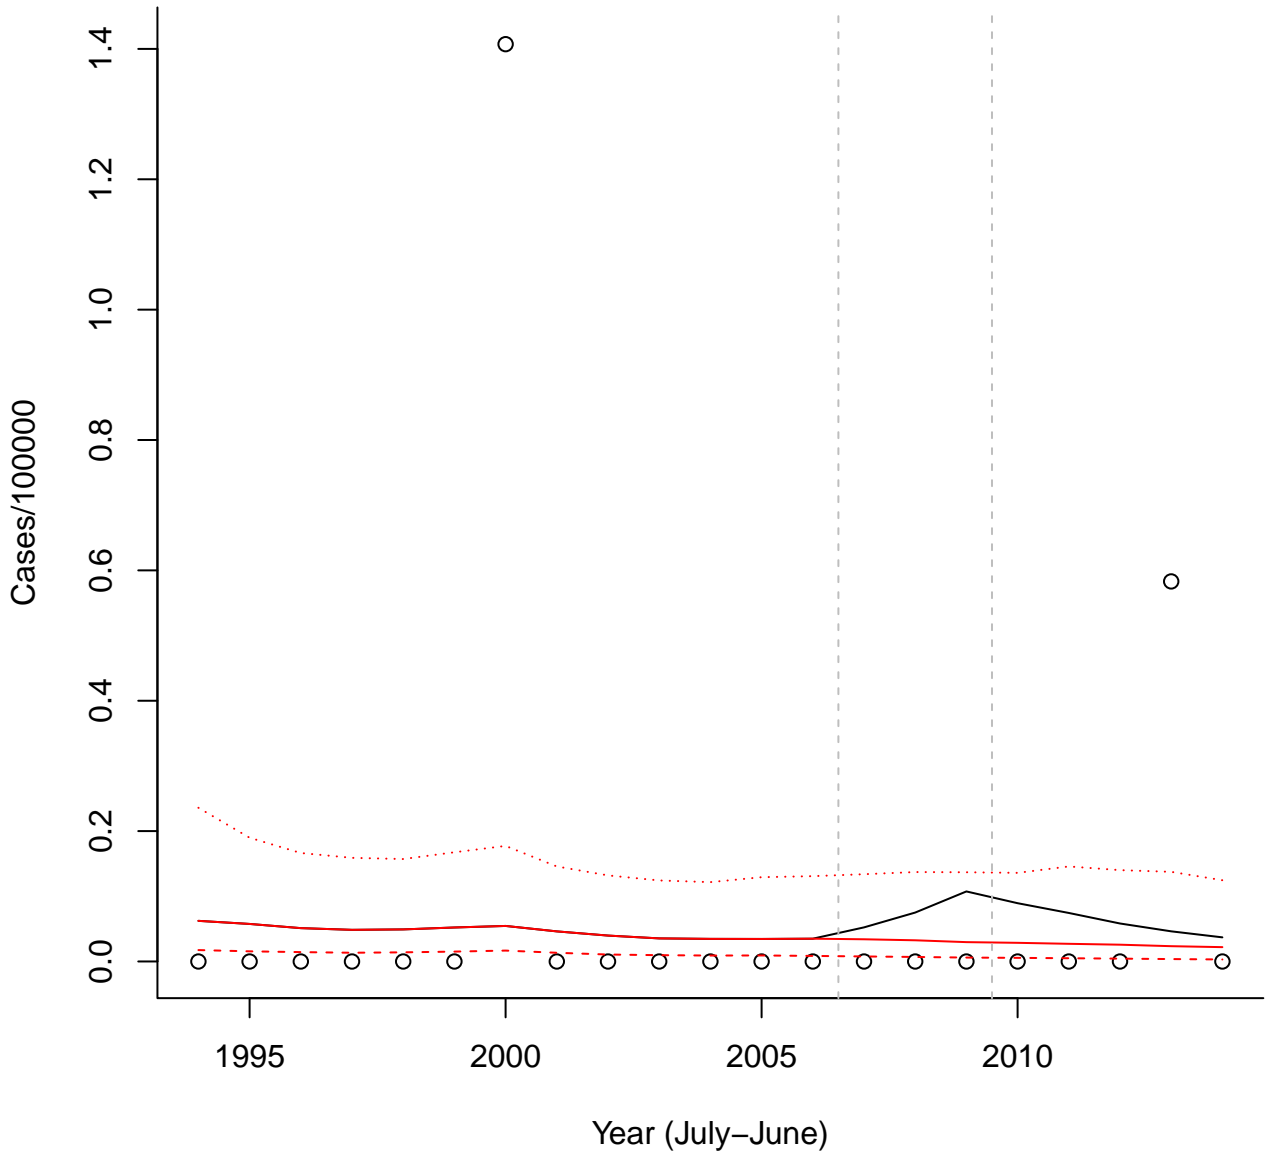

# 40–64y With comorbidity Serotype 1

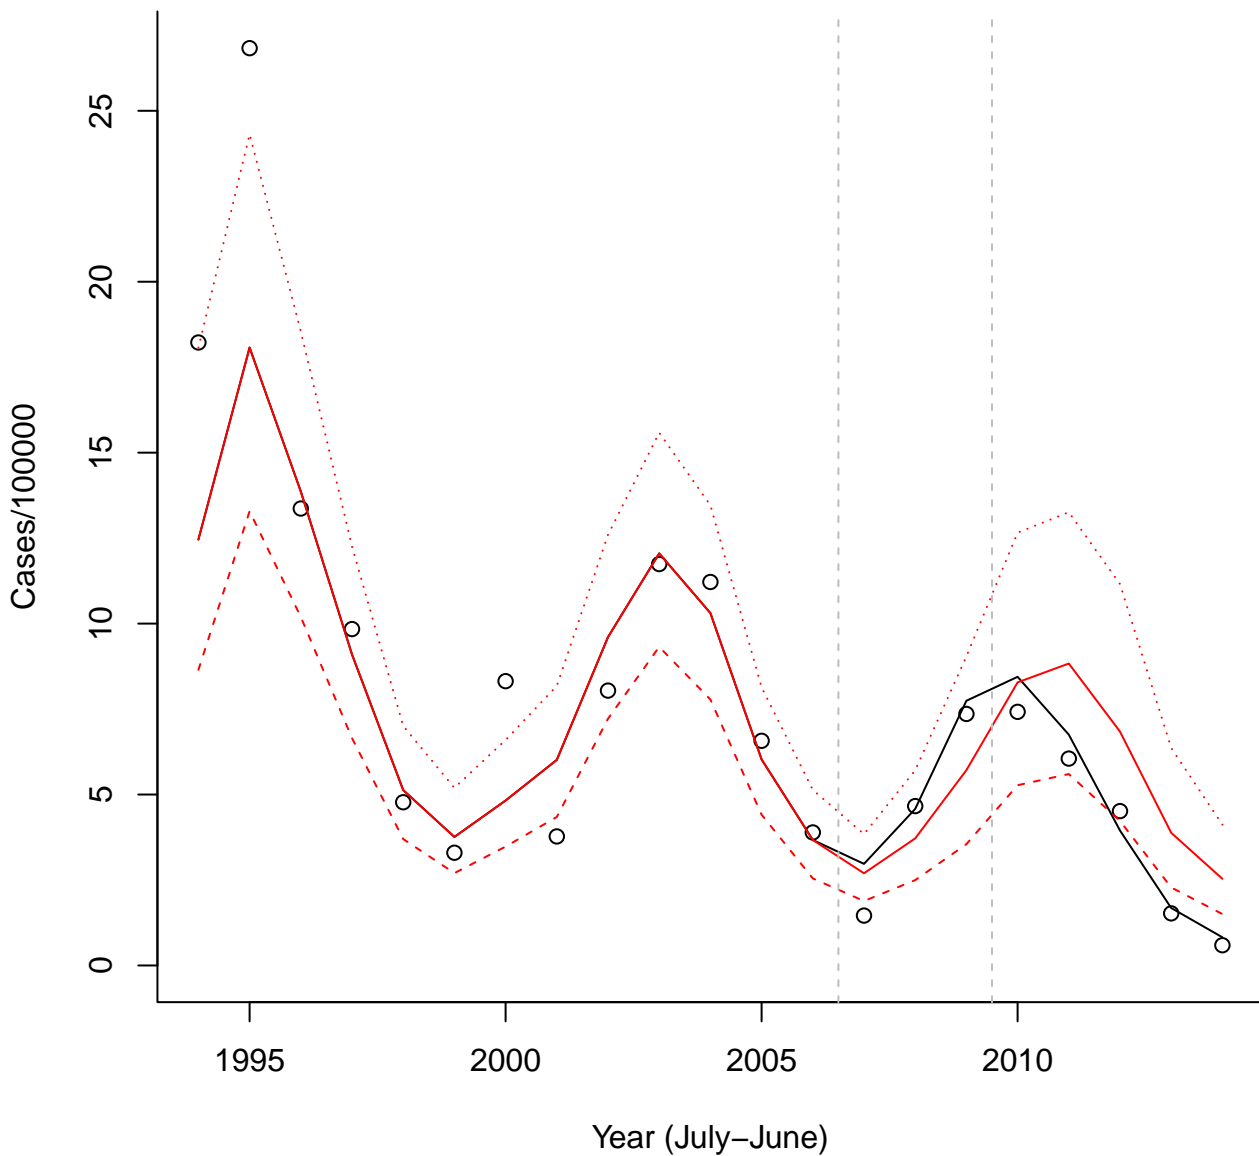

# 40-64y With comorbidity Serotype 10A

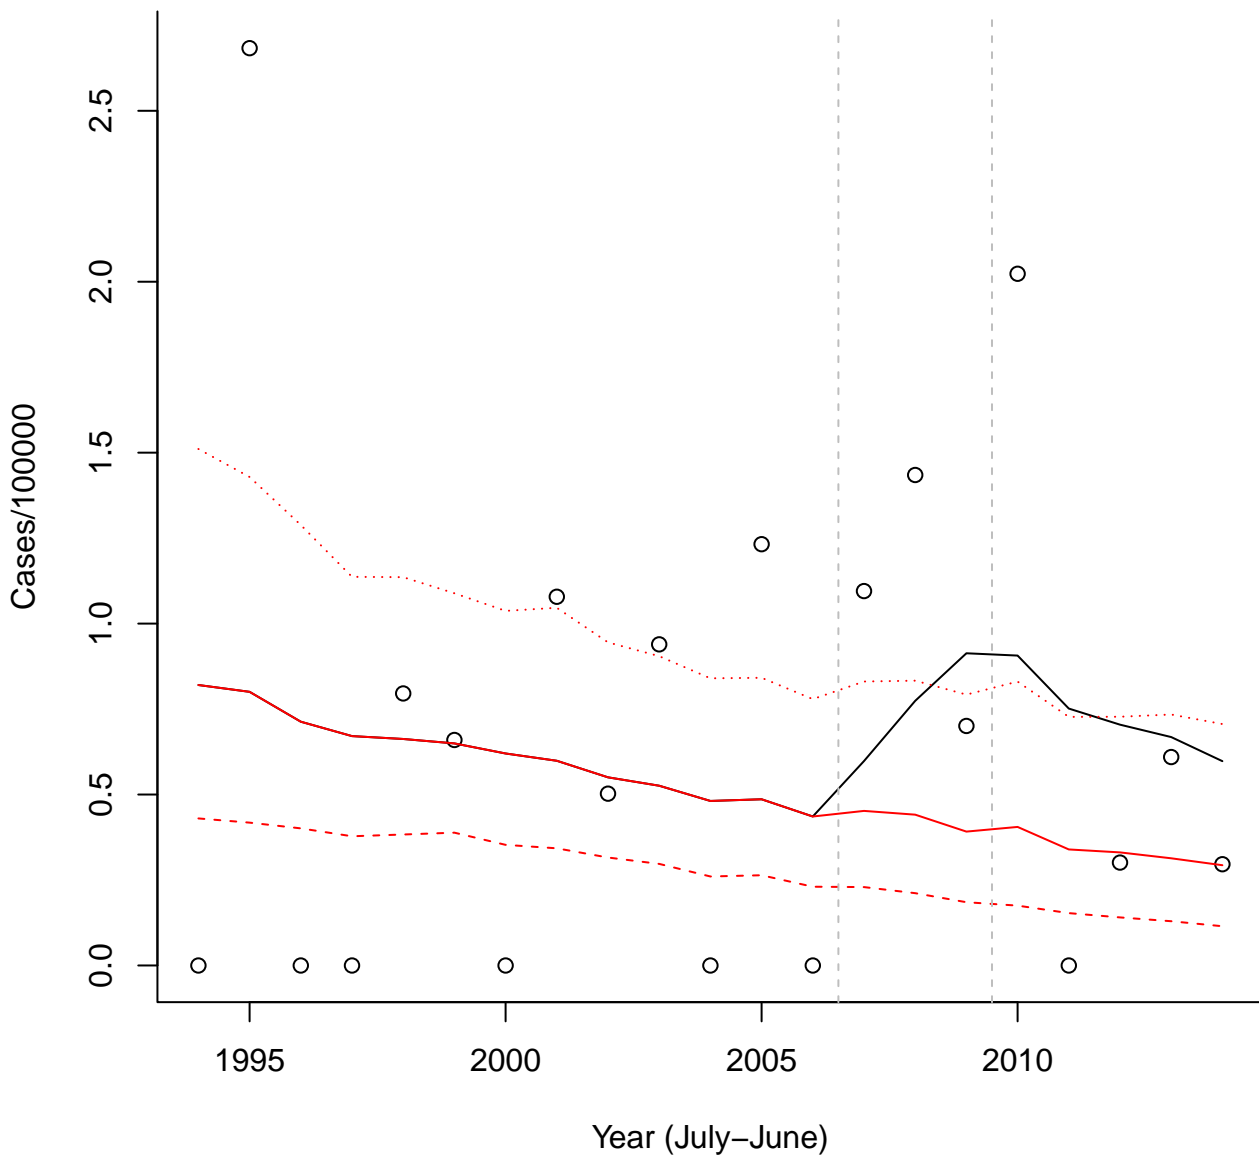

# 40–64y With comorbidity Serotype 10B

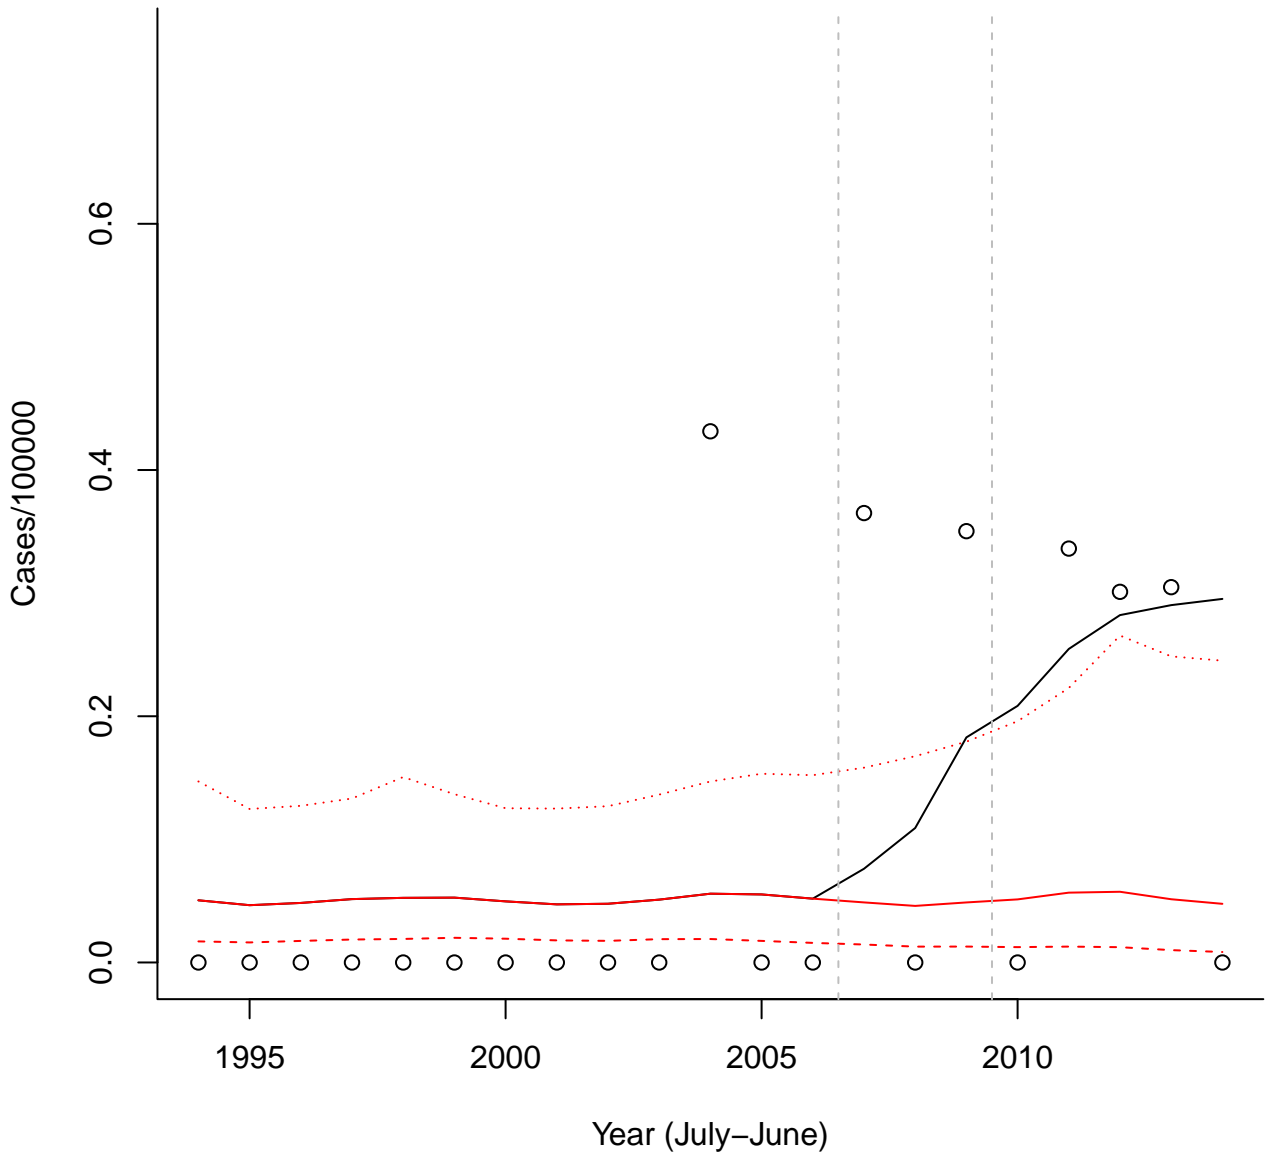

# 40-64y With comorbidity Serotype 10F

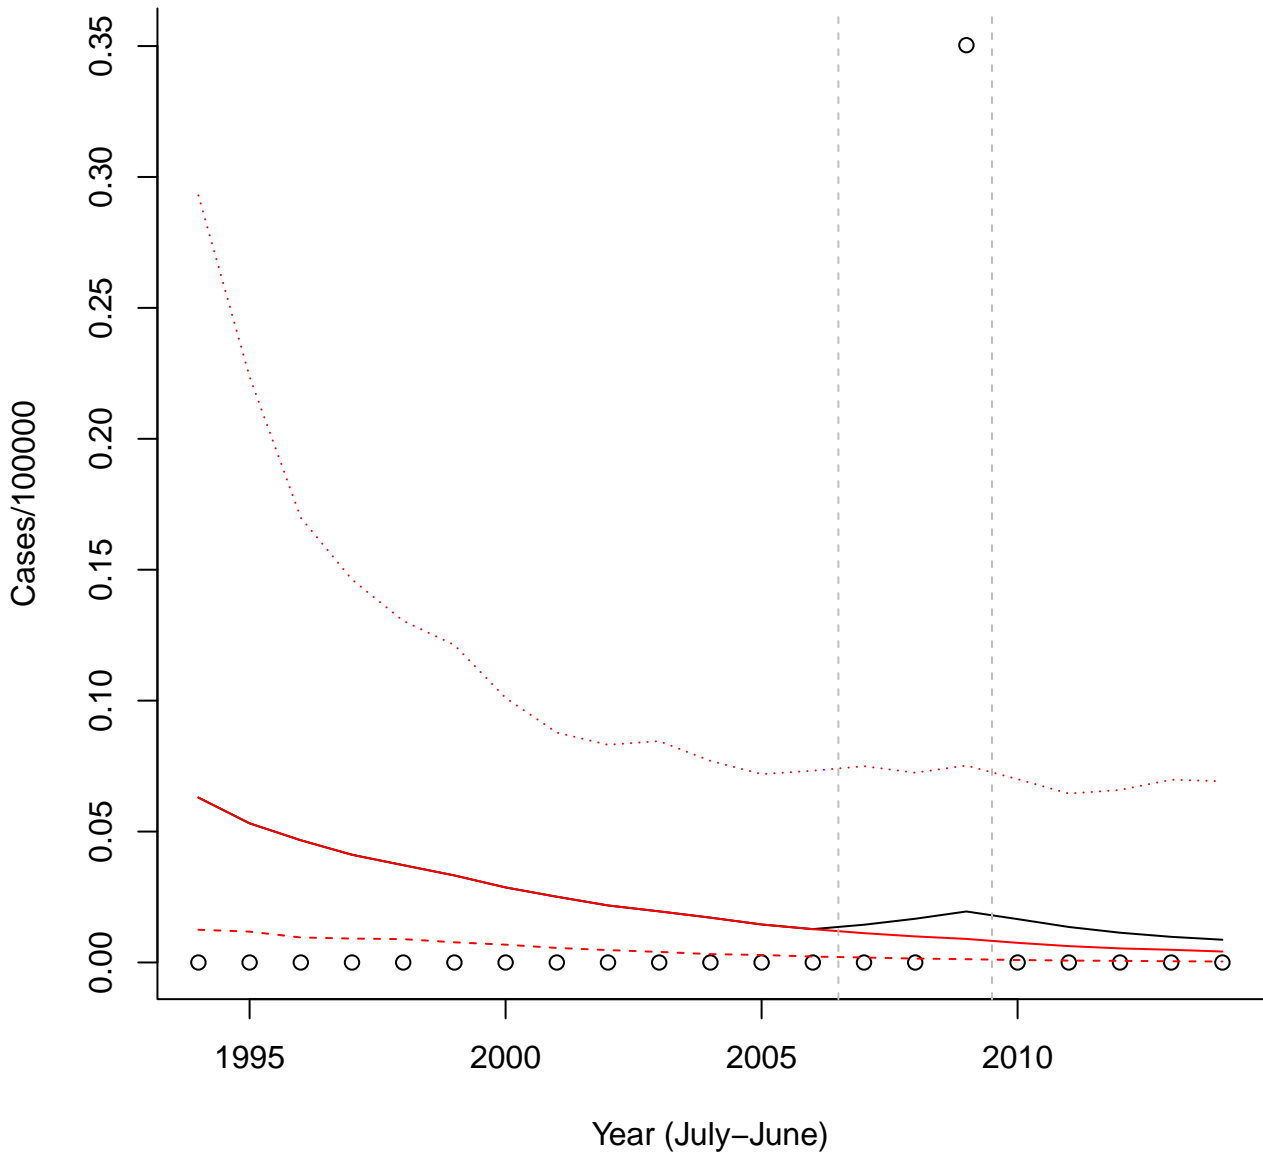

# 40-64y With comorbidity Serotype 11A

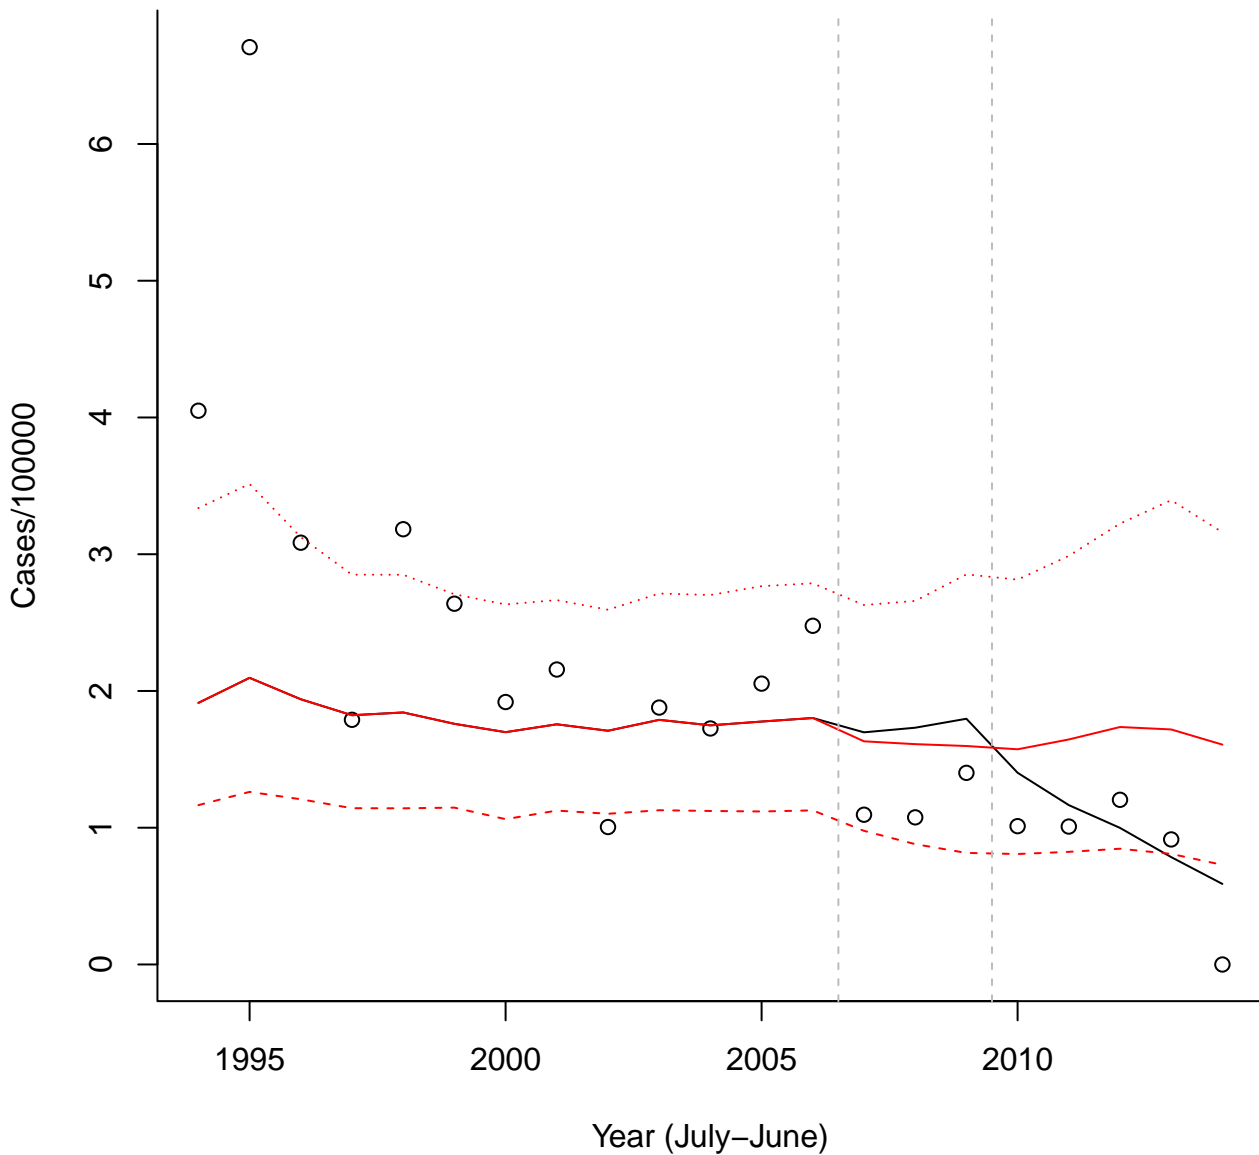

# 40-64y With comorbidity Serotype 11B

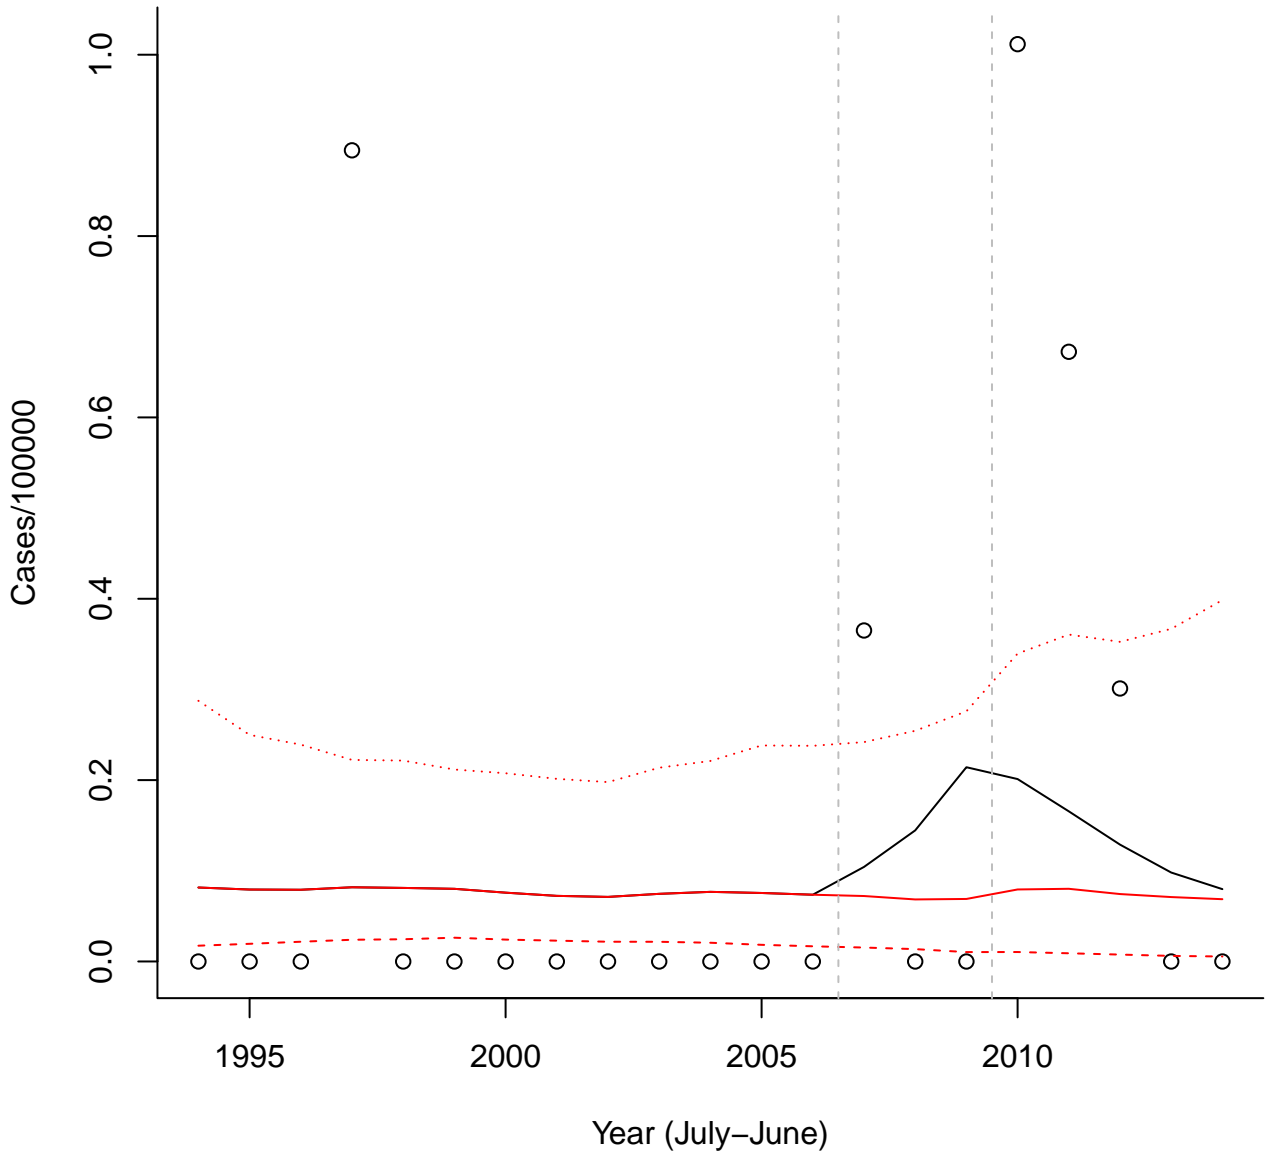

# 40-64y With comorbidity Serotype 11F

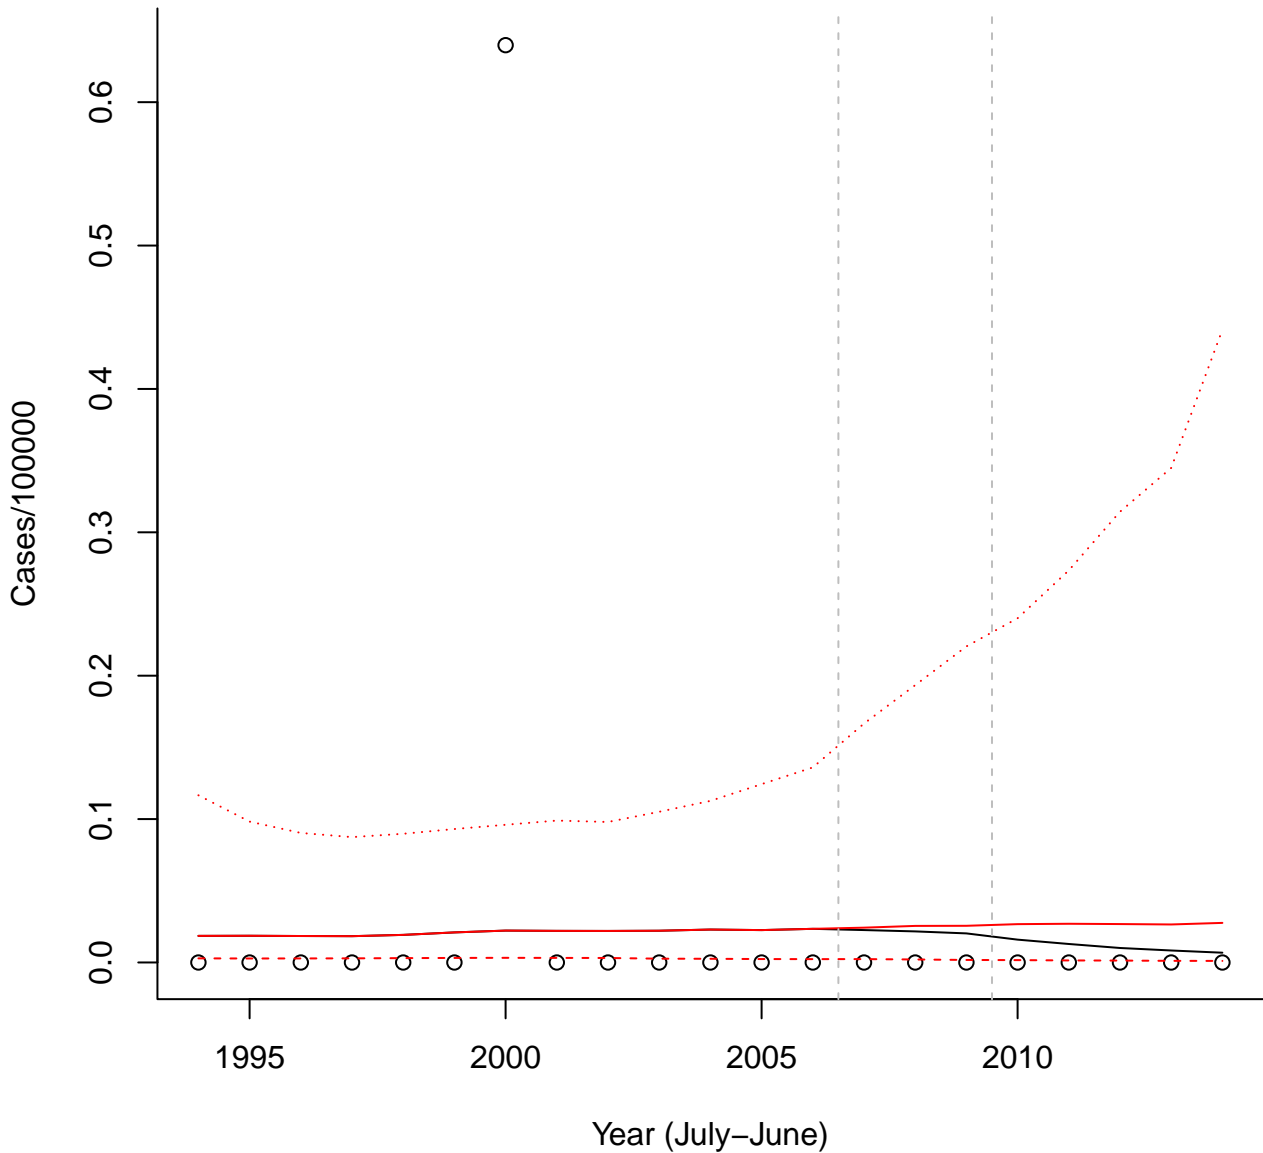



# 40-64y With comorbidity Serotype 12F

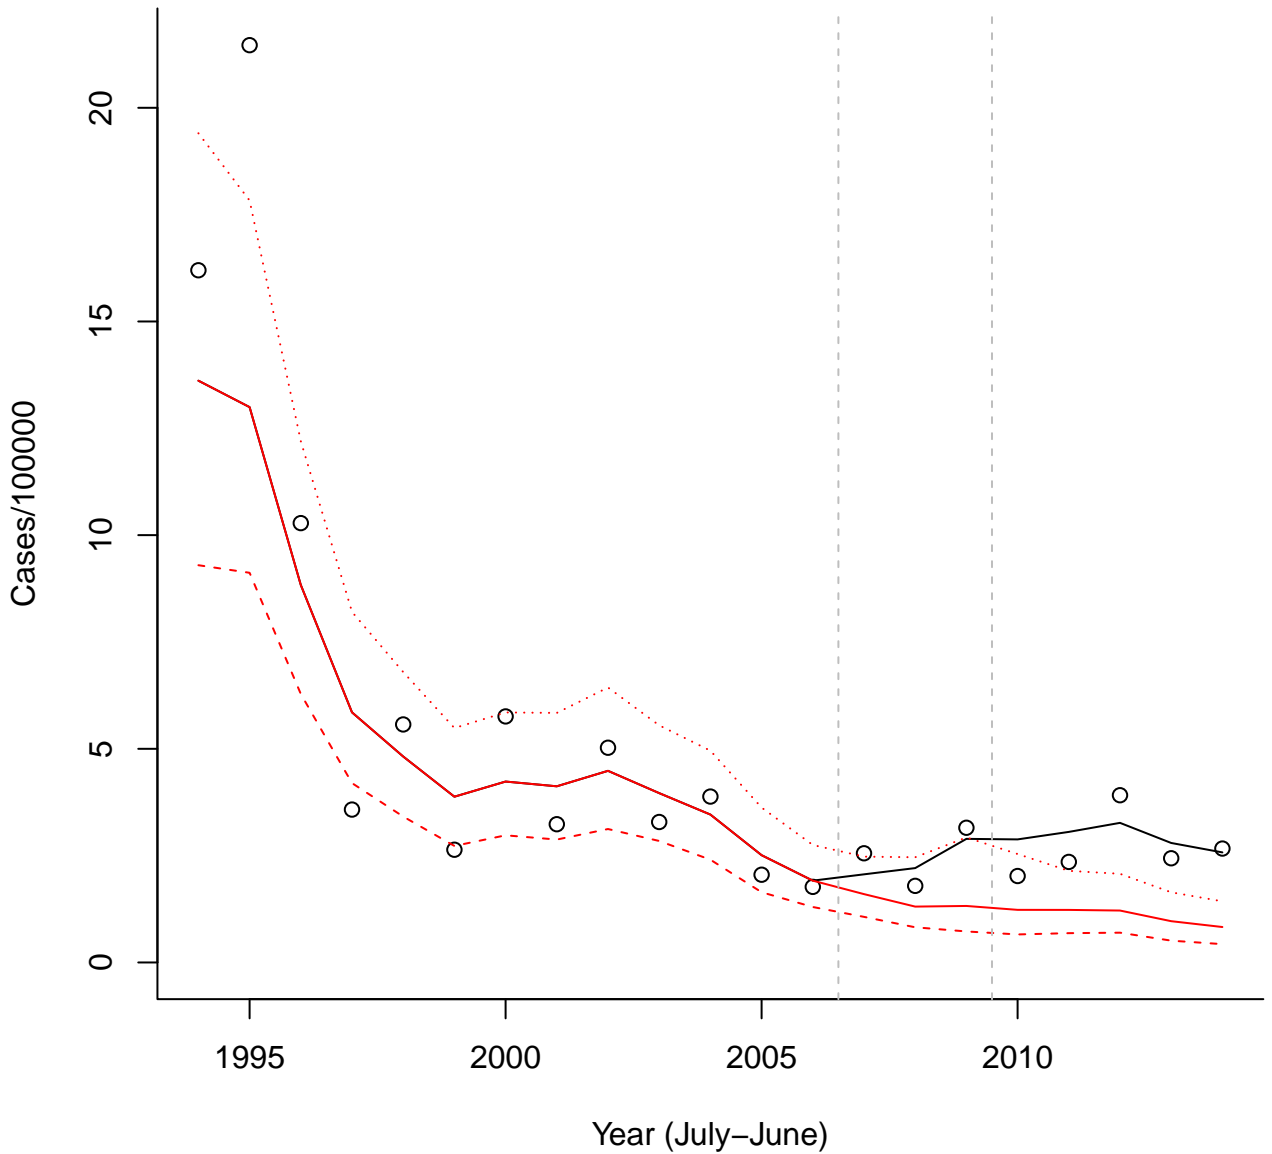

# 40–64y With comorbidity Serotype 13

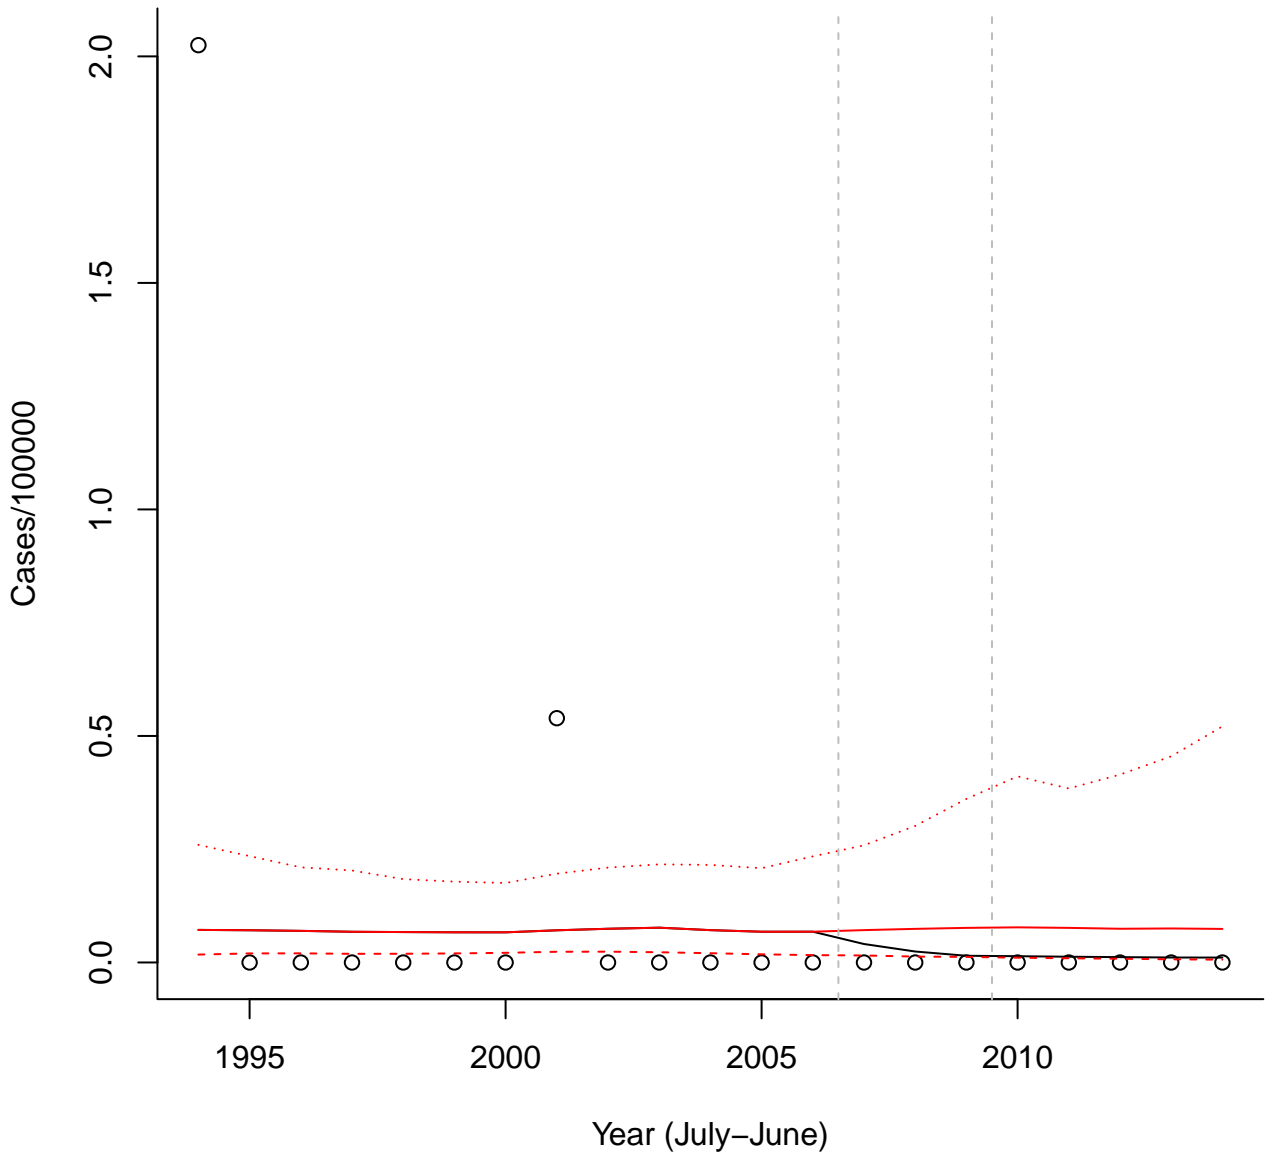

# 40-64y With comorbidity Serotype 14

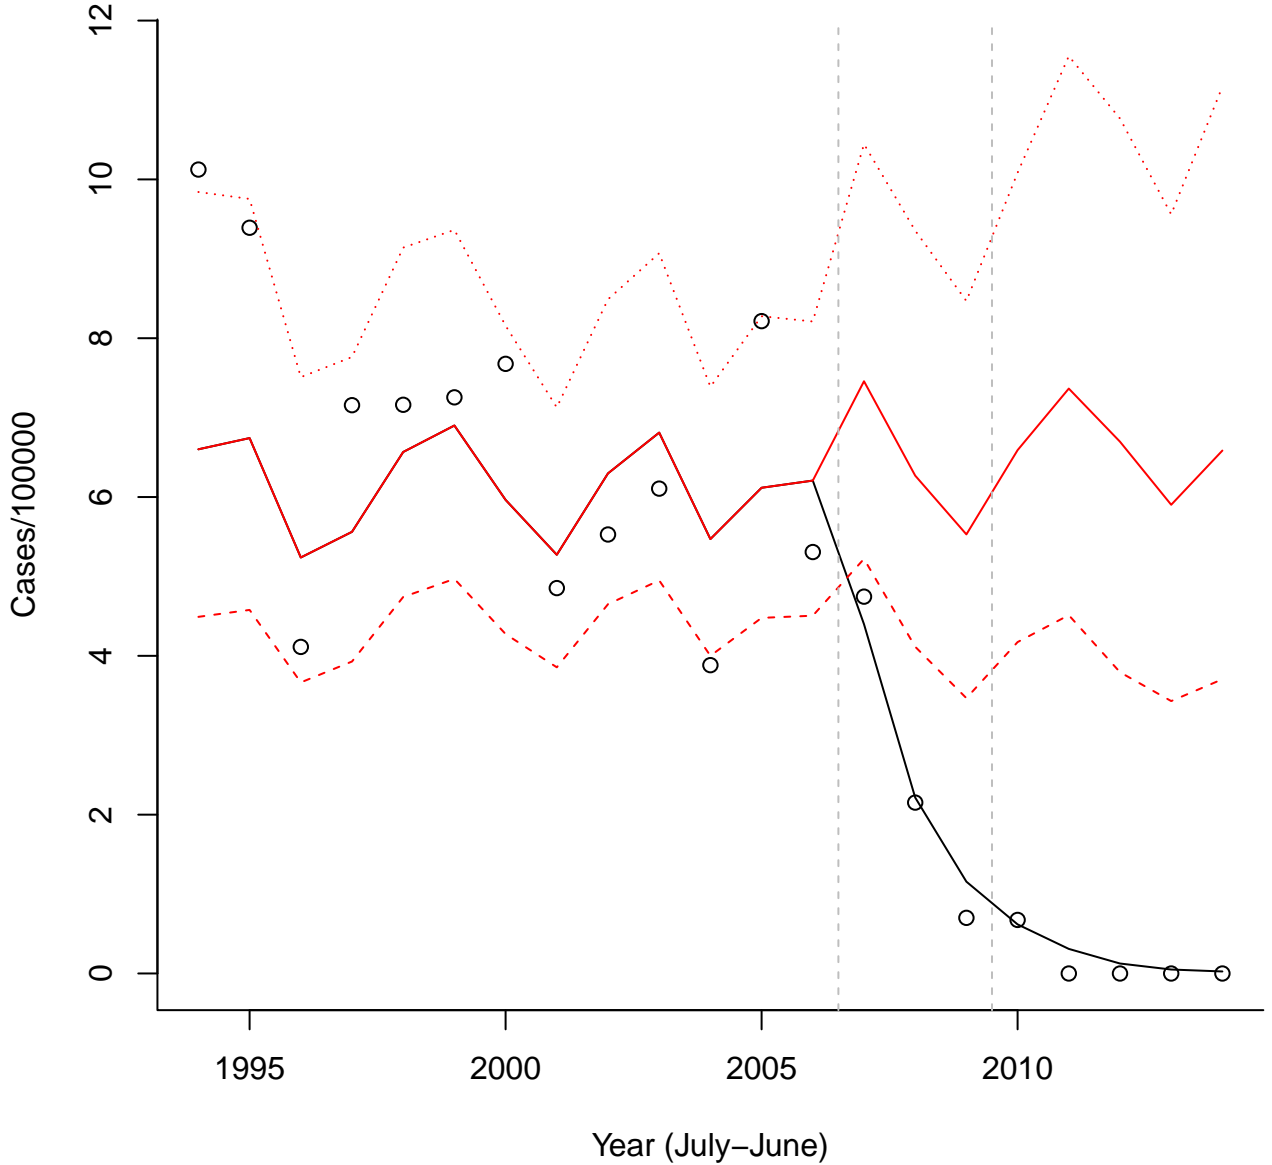

# 40–64y With comorbidity Serotype 15A

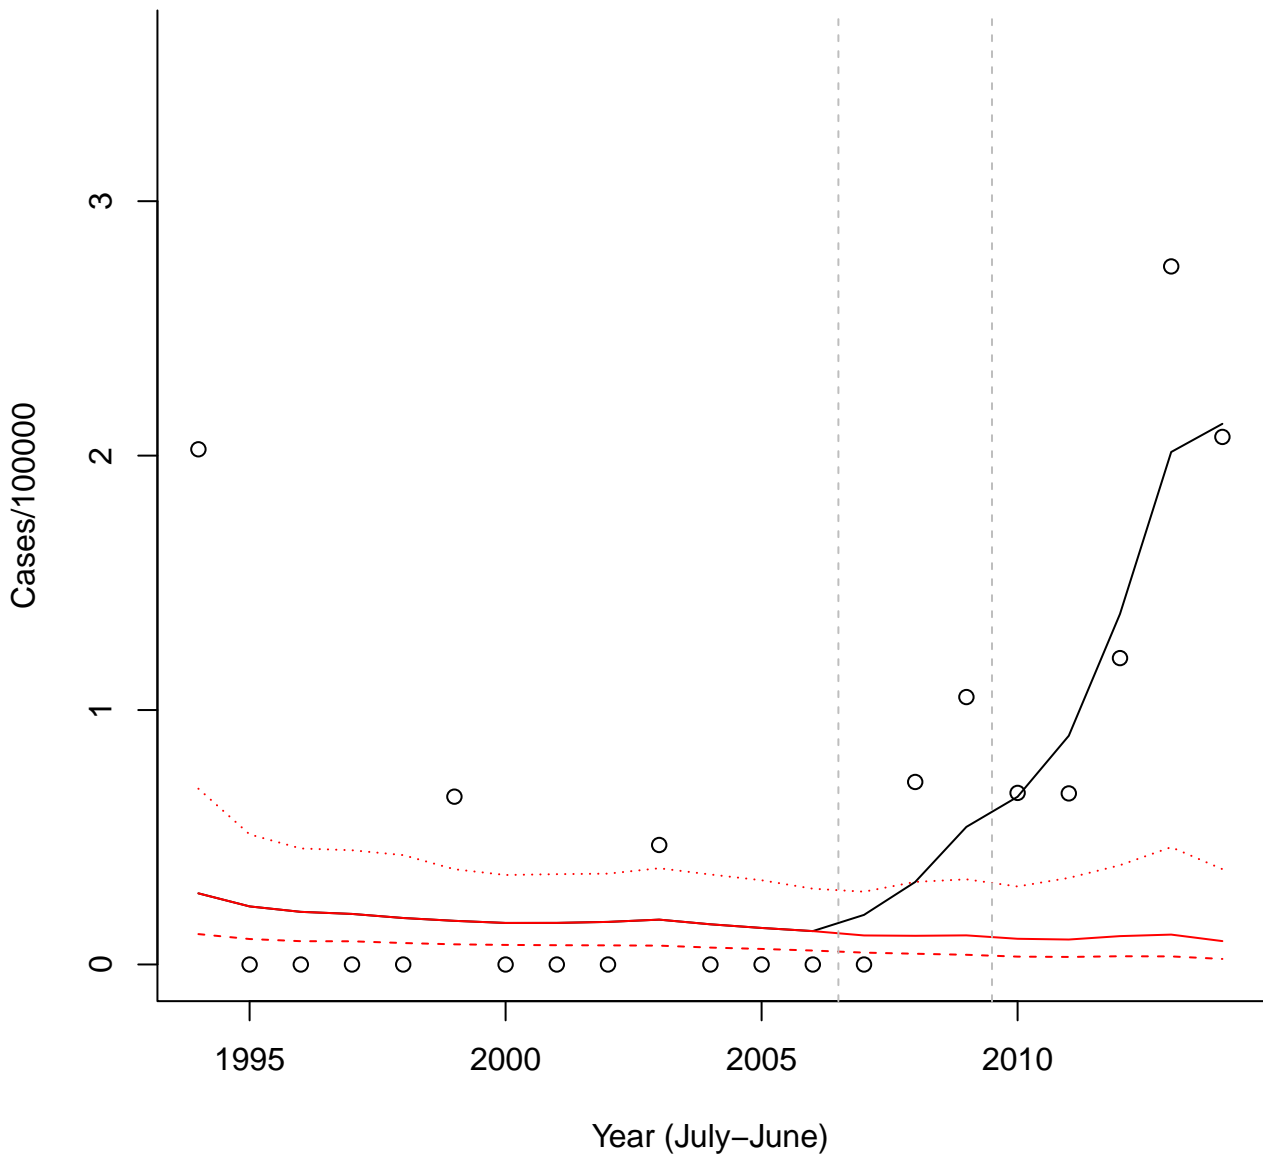

# 40–64y With comorbidity Serotype 15BC

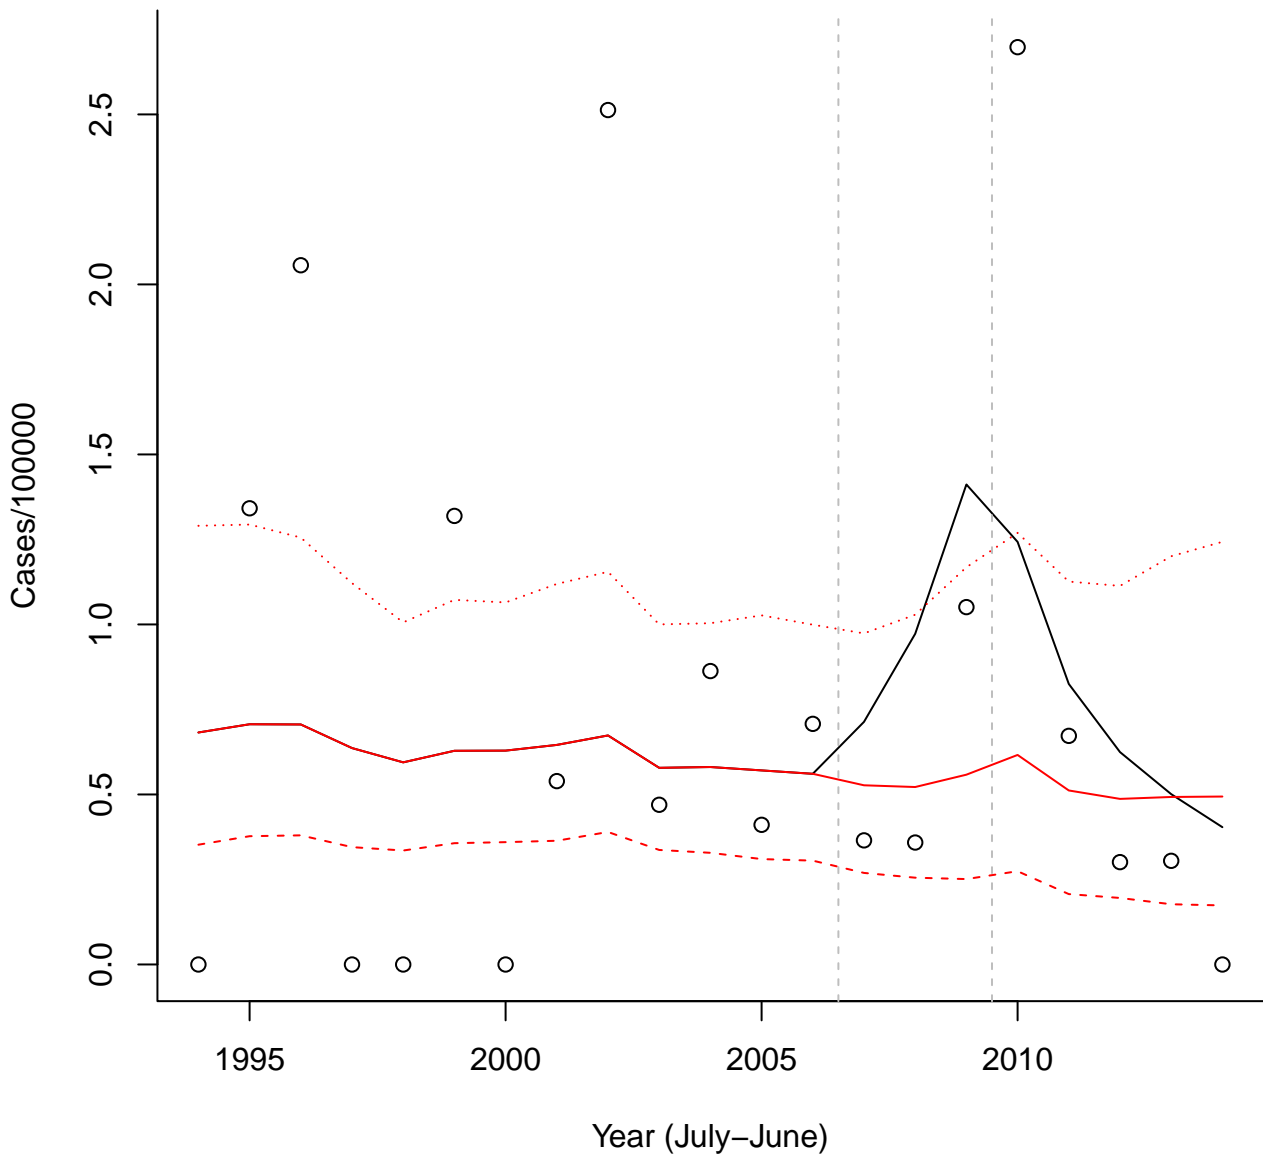

# 40–64y With comorbidity Serotype 16F

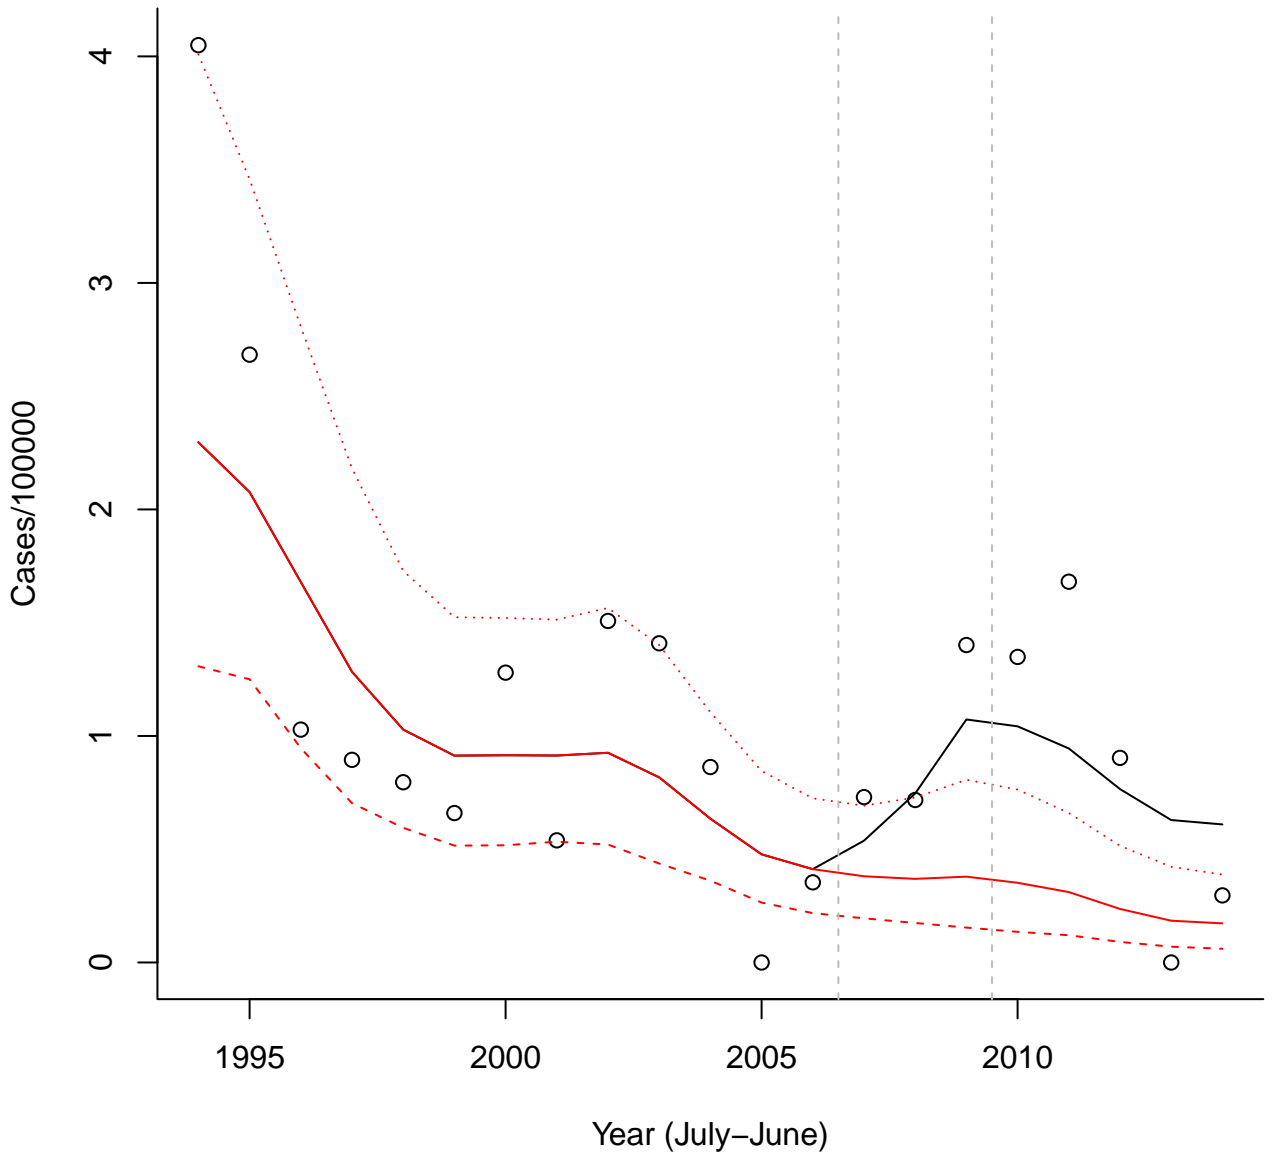

# 40–64y With comorbidity Serotype 17A

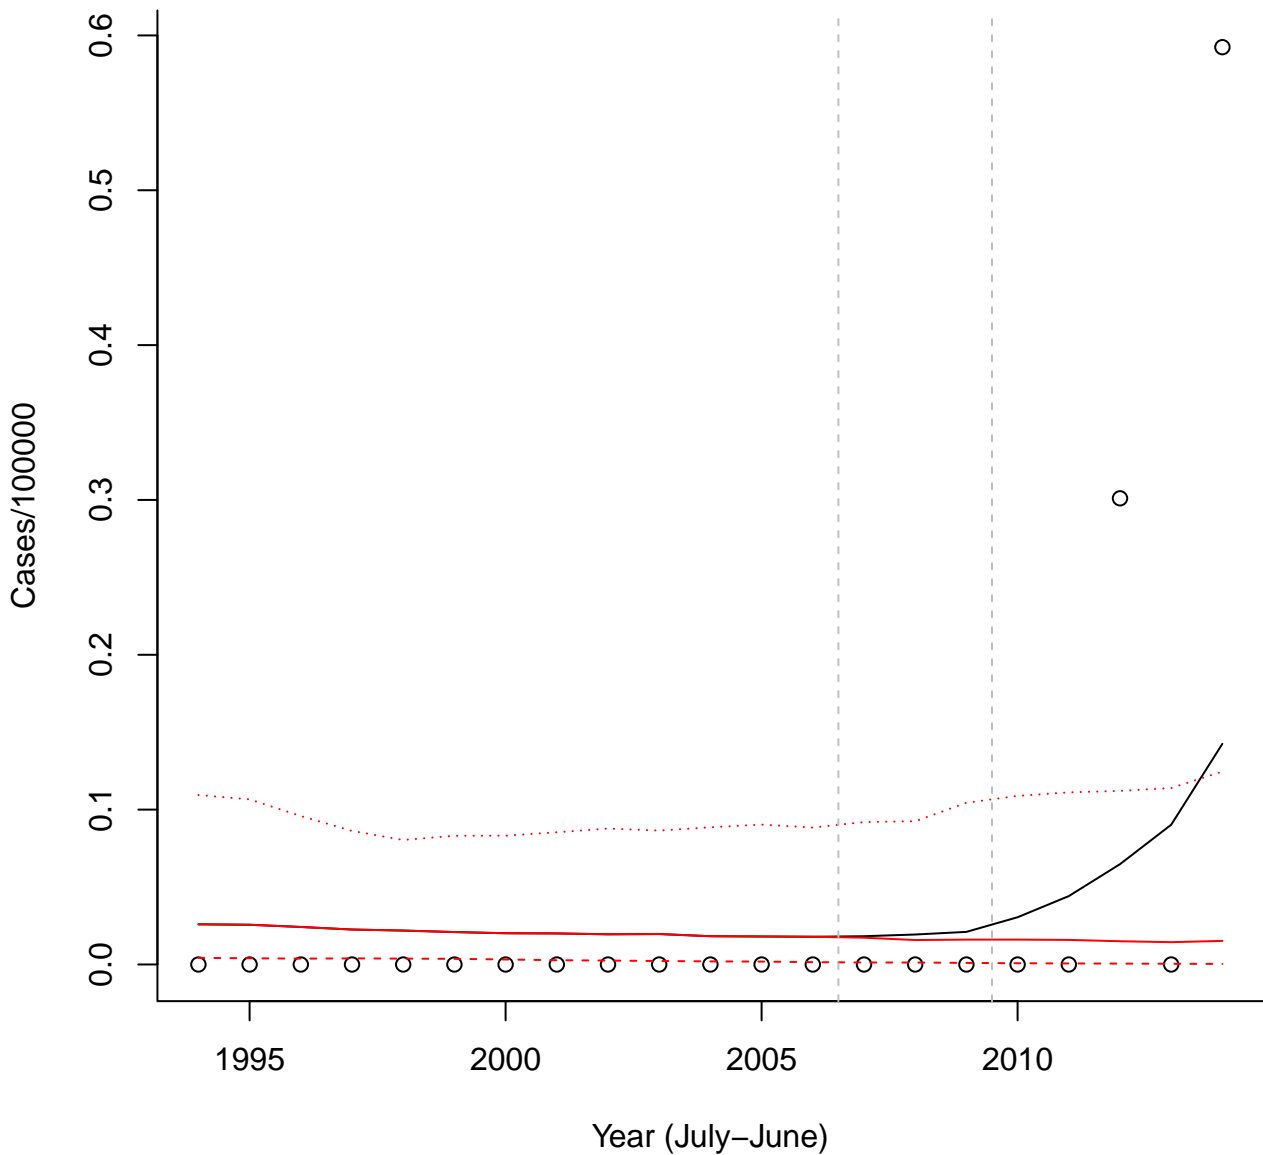

# 40-64y With comorbidity Serotype 17F

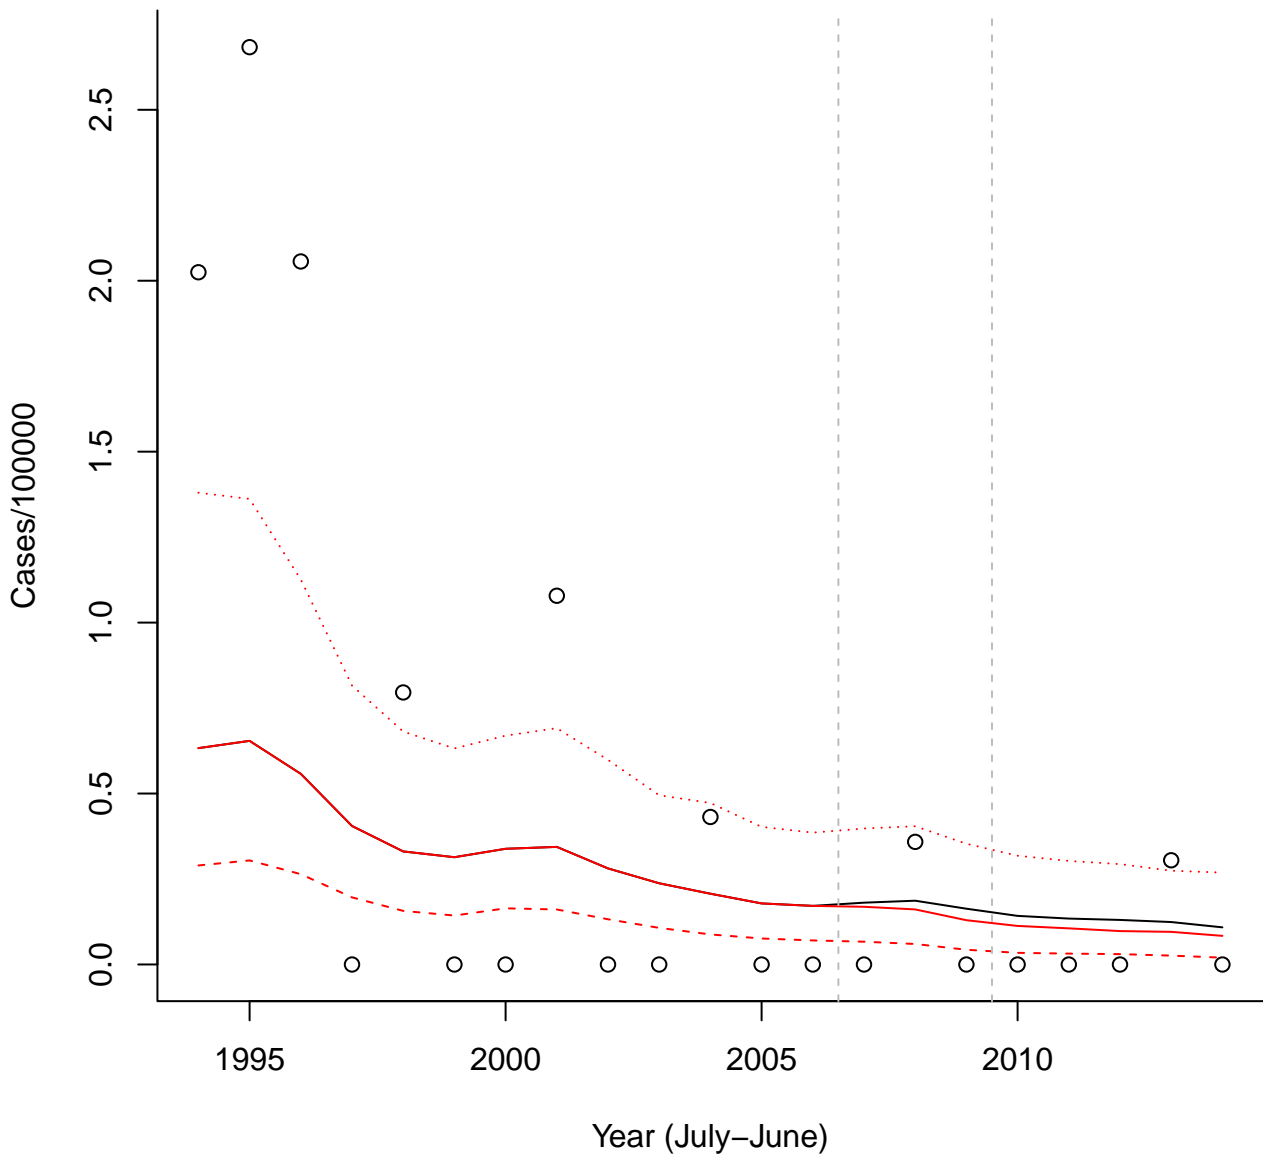



# 40–64y With comorbidity Serotype 18A

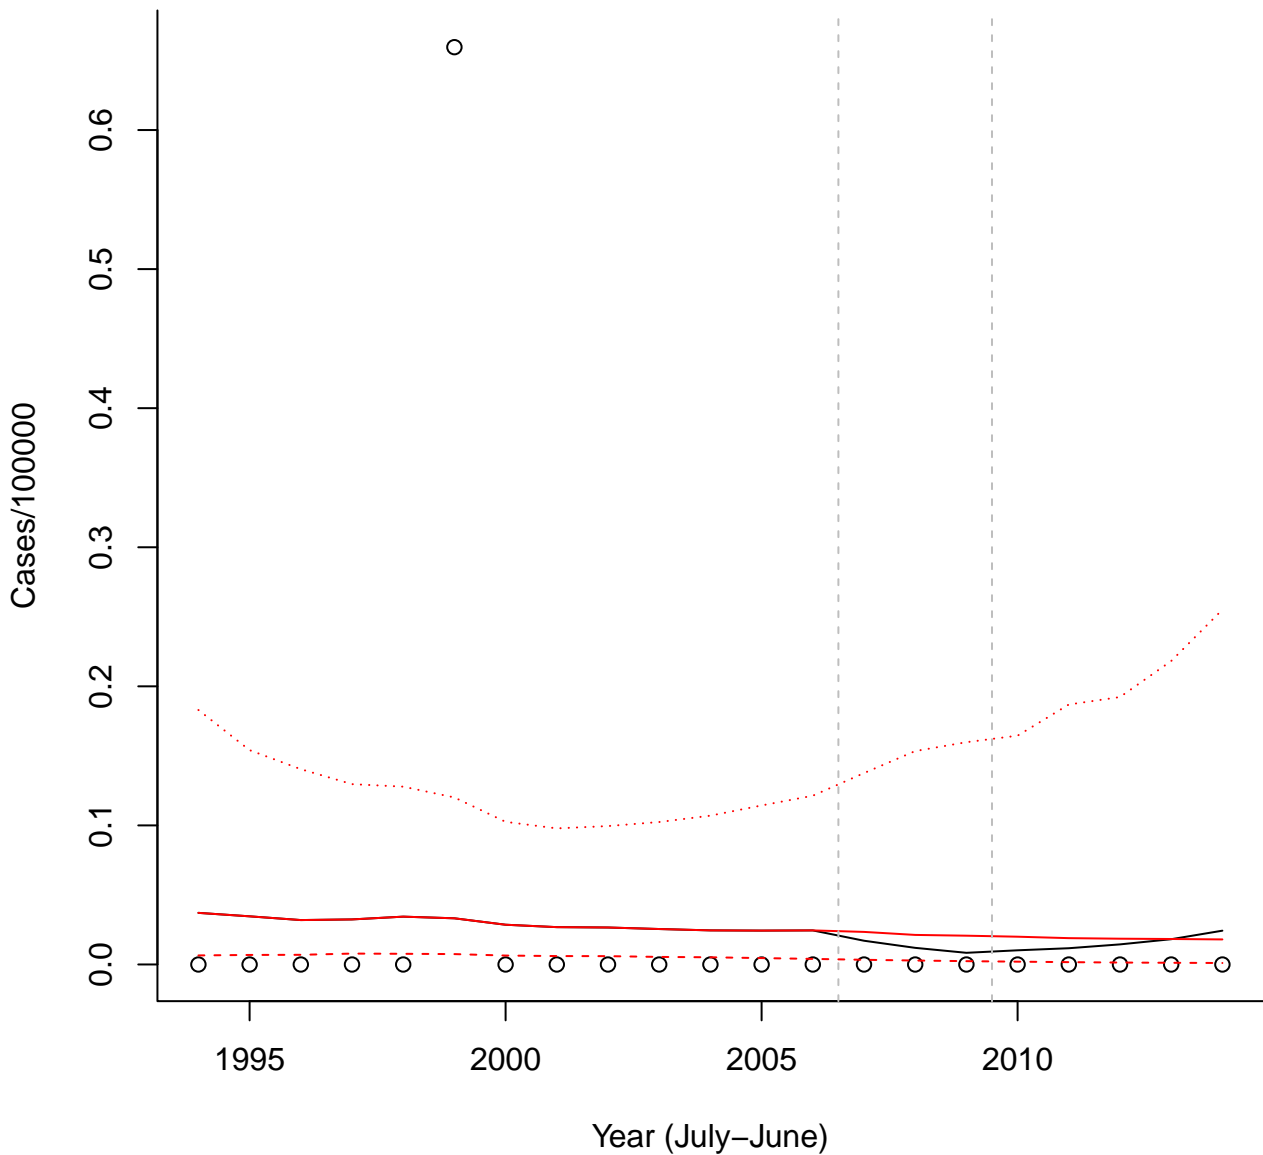

# 40–64y With comorbidity Serotype 18B

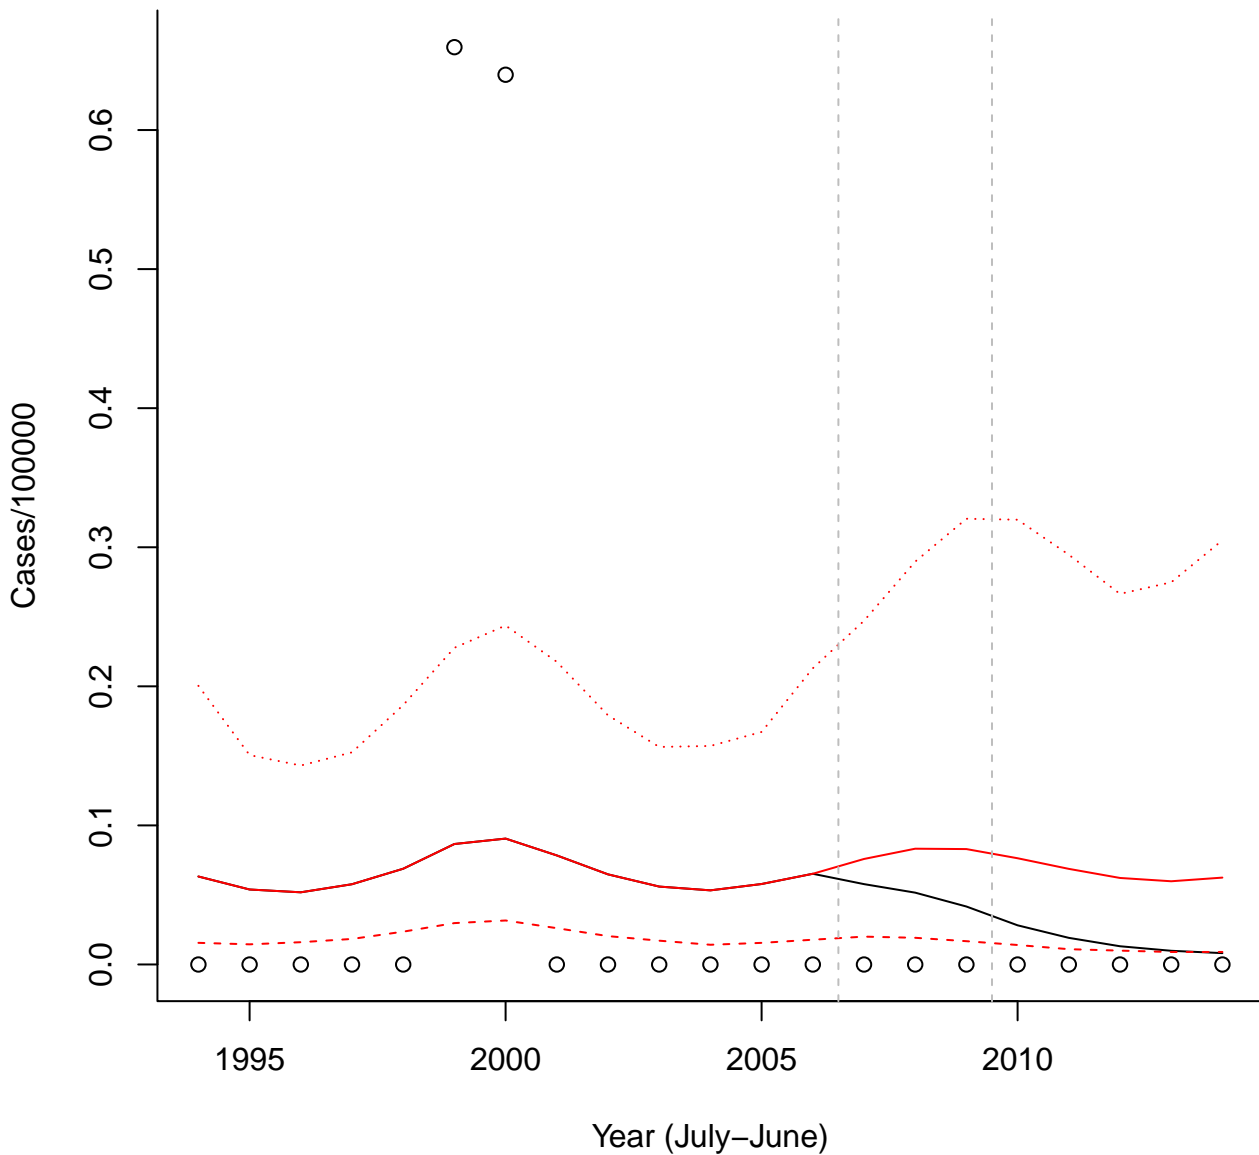

# 40-64y With comorbidity Serotype 18C

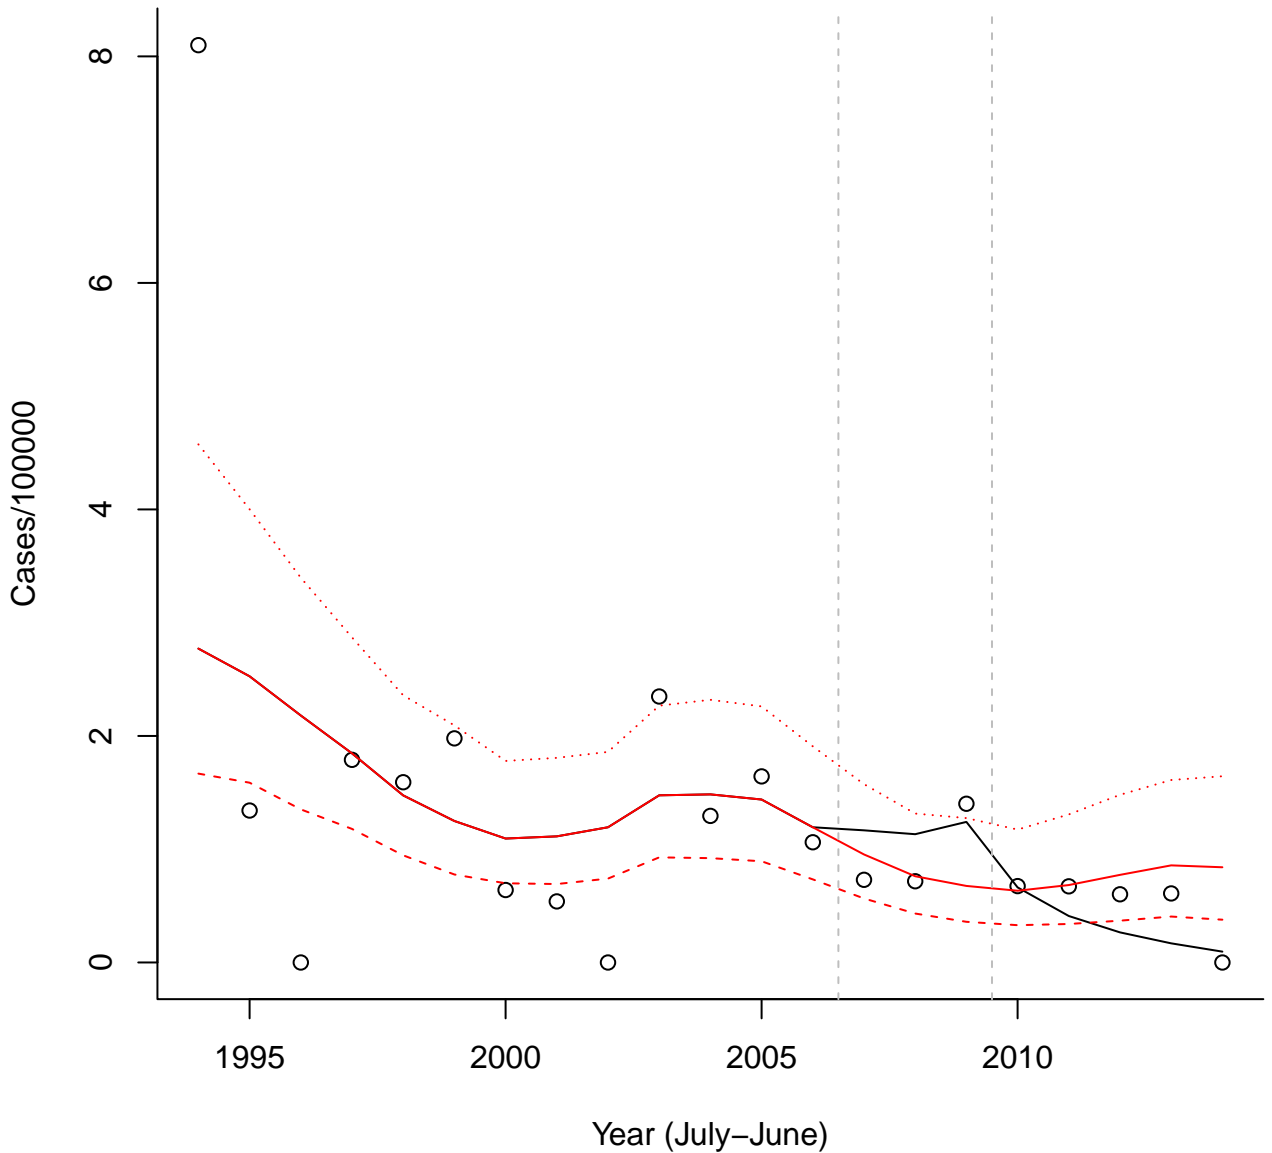

# 40–64y With comorbidity Serotype 18F

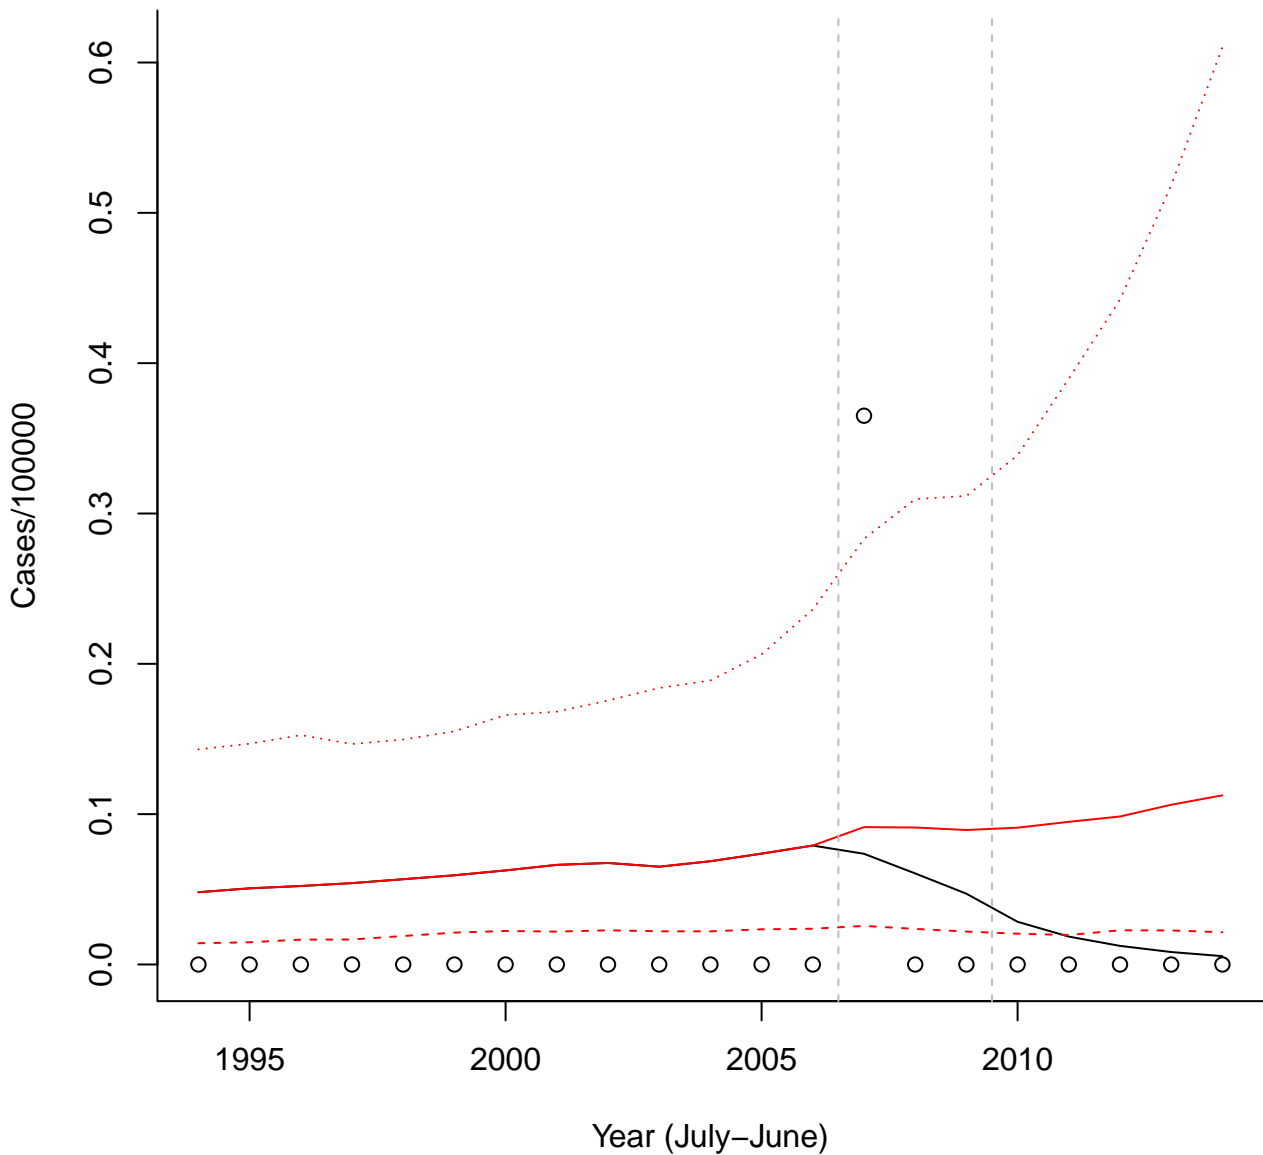

# 40-64y With comorbidity Serotype 19A

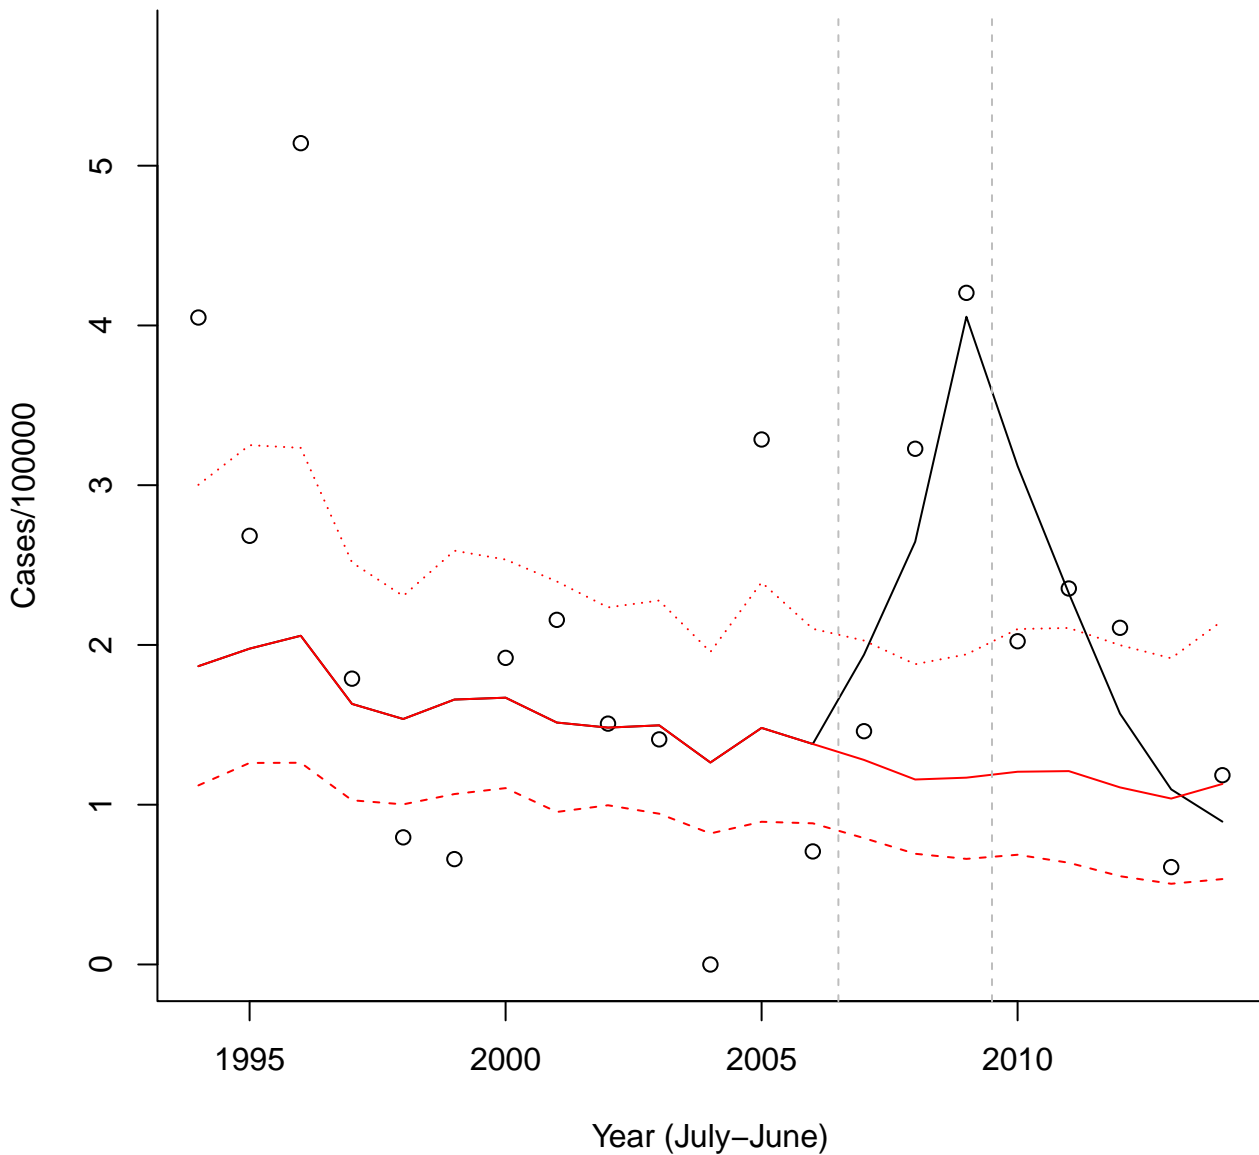

# 40-64y With comorbidity Serotype 19F

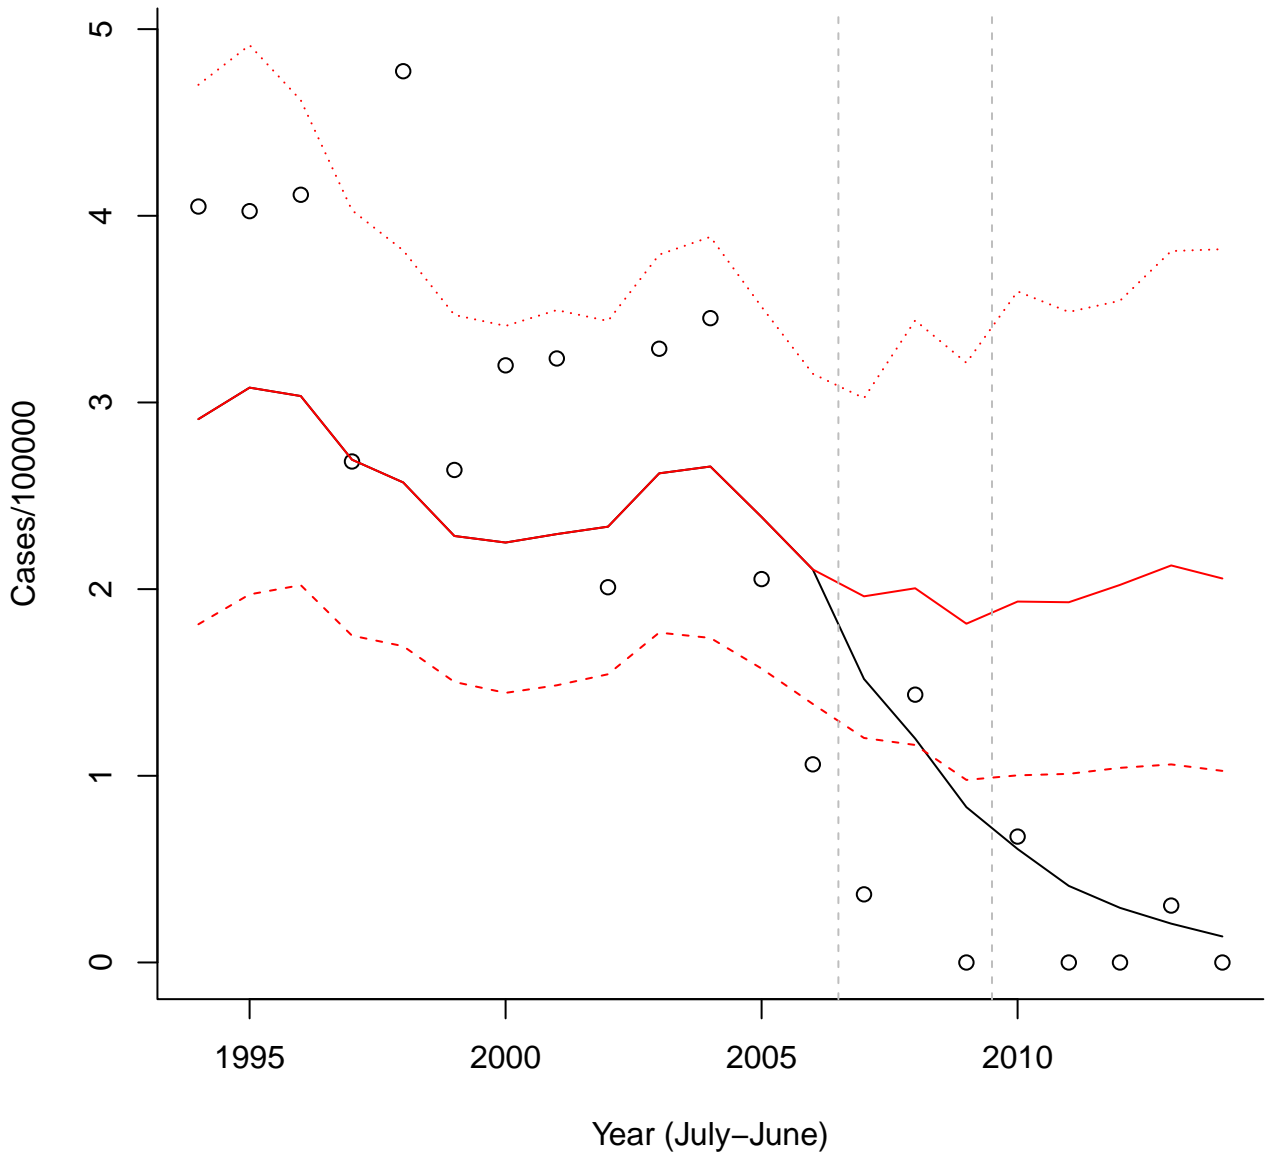

# 40–64y With comorbidity Serotype 2

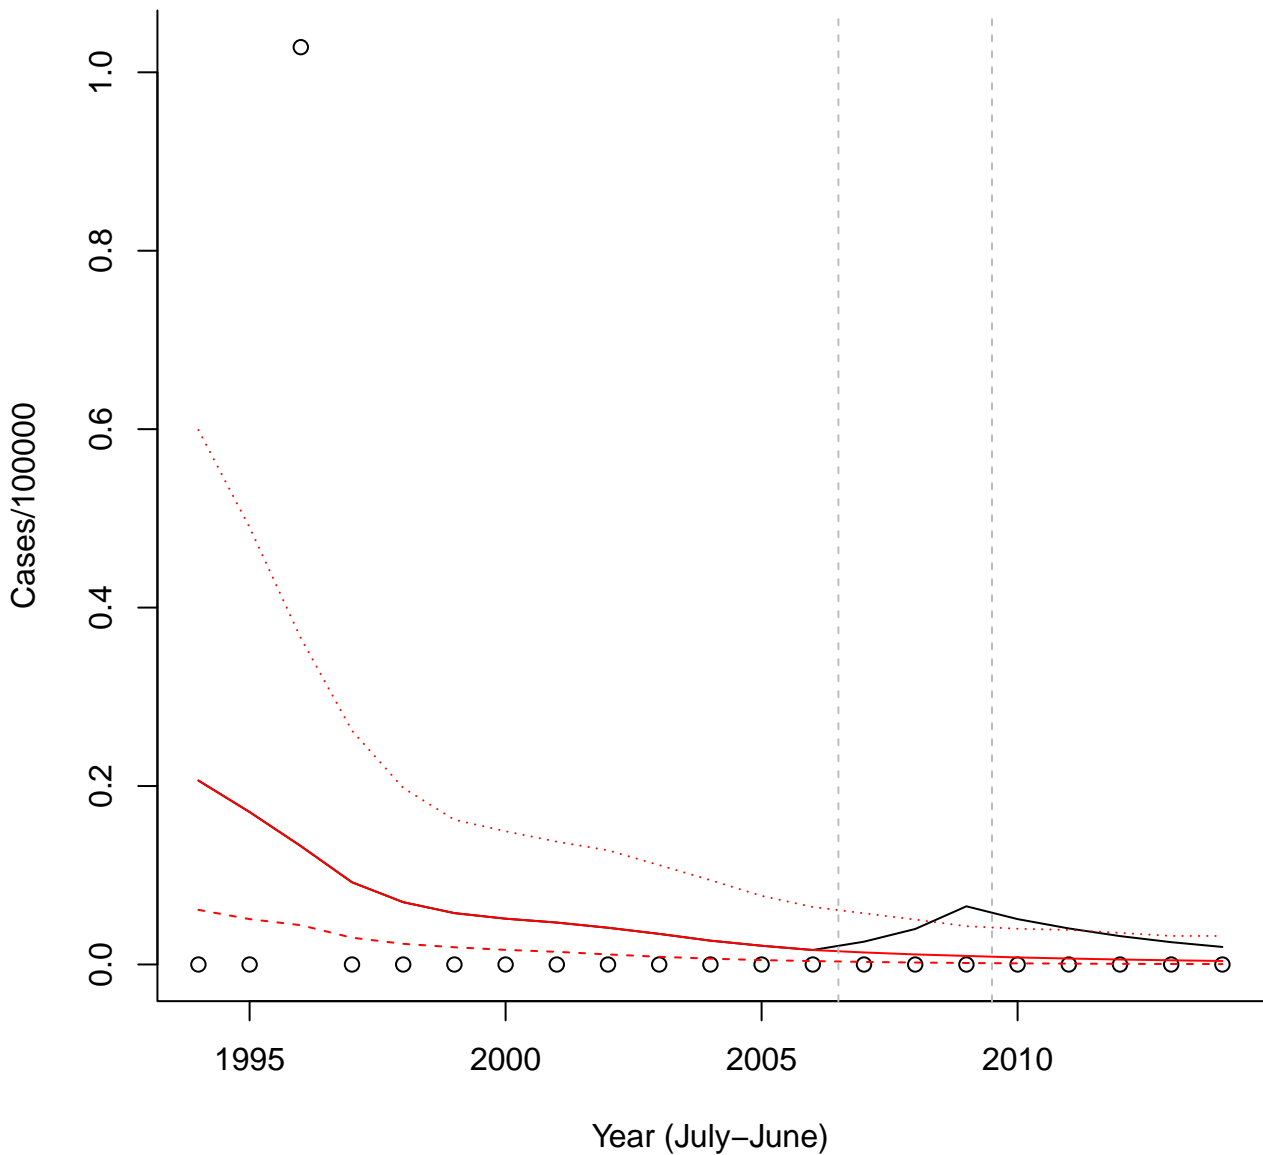

# 40–64y With comorbidity Serotype 20

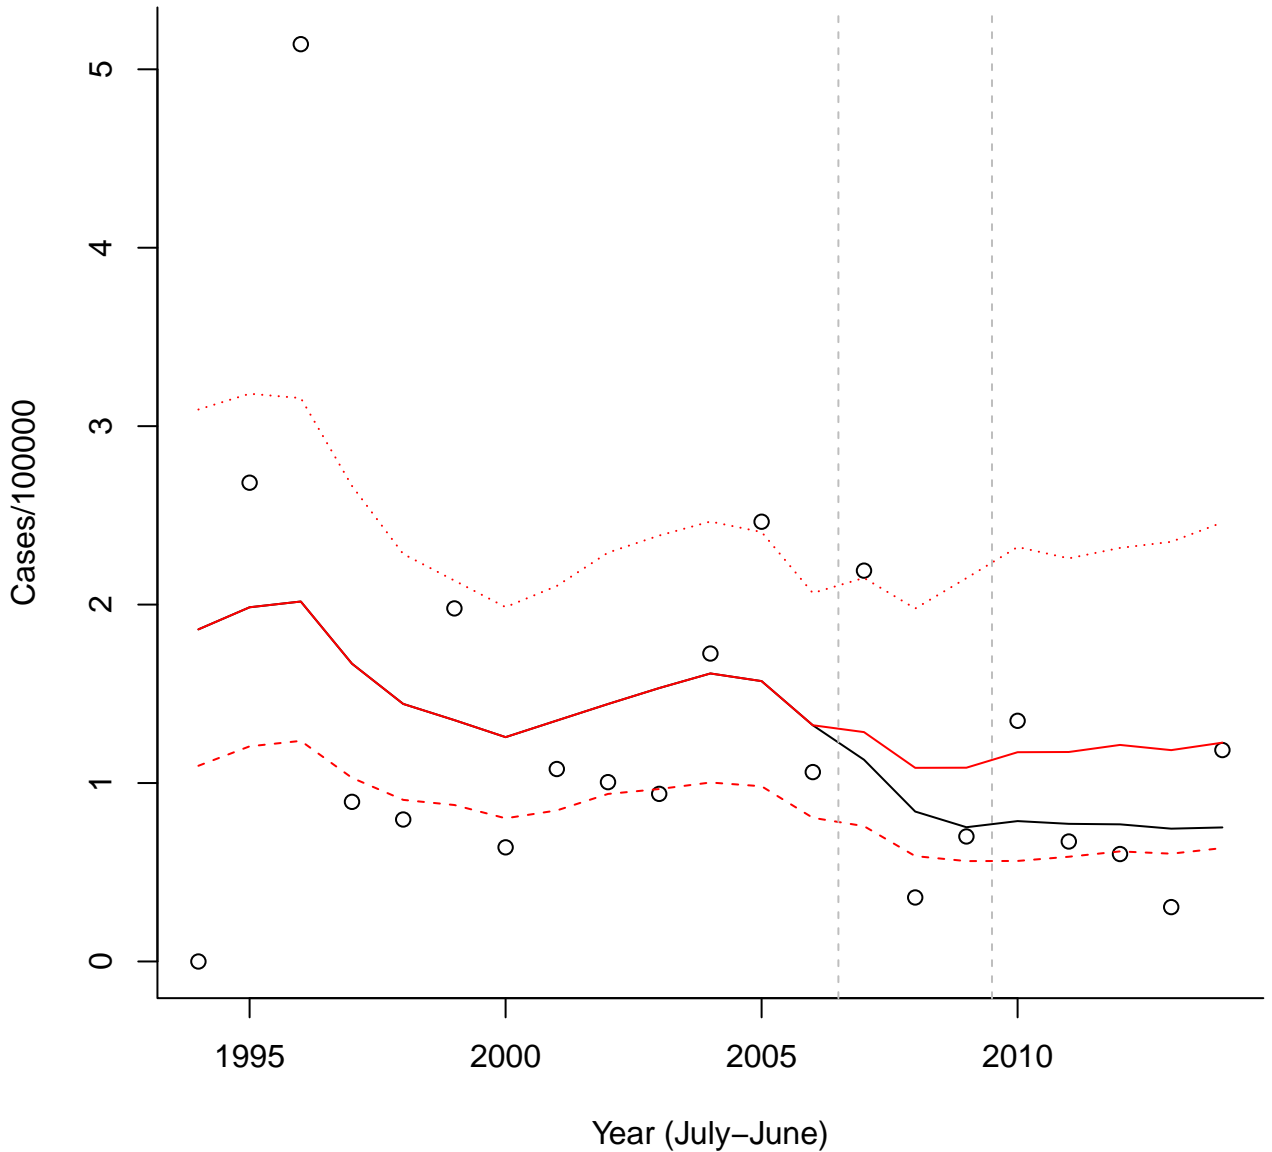



# 40–64y With comorbidity Serotype 21

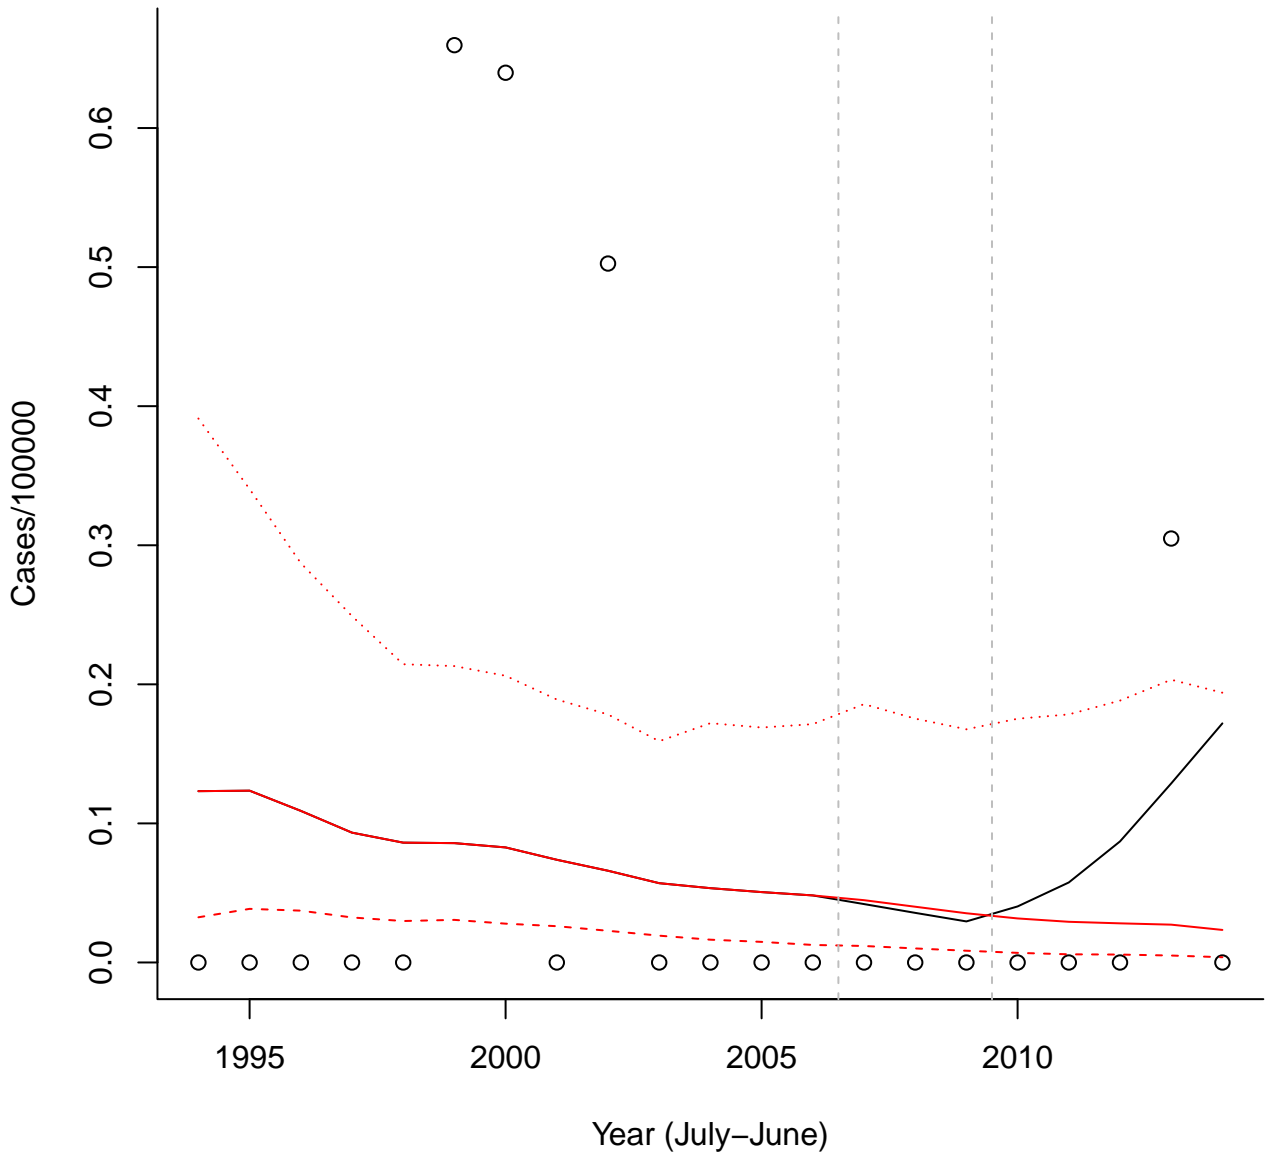

# 40-64y With comorbidity Serotype 22F

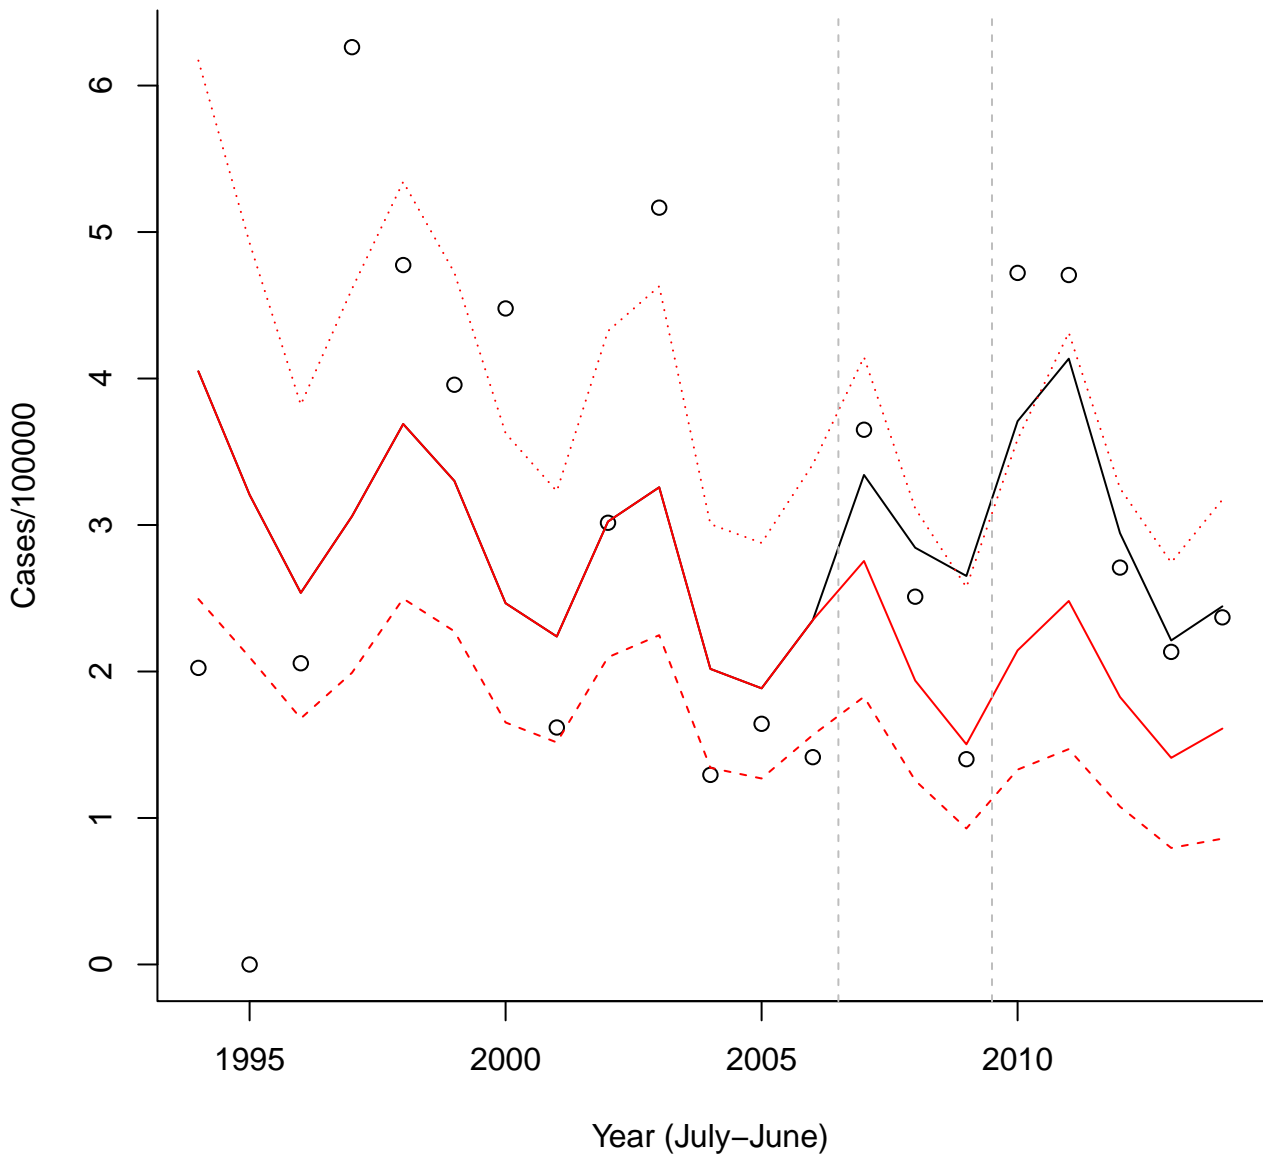

# 40-64y With comorbidity Serotype 23A

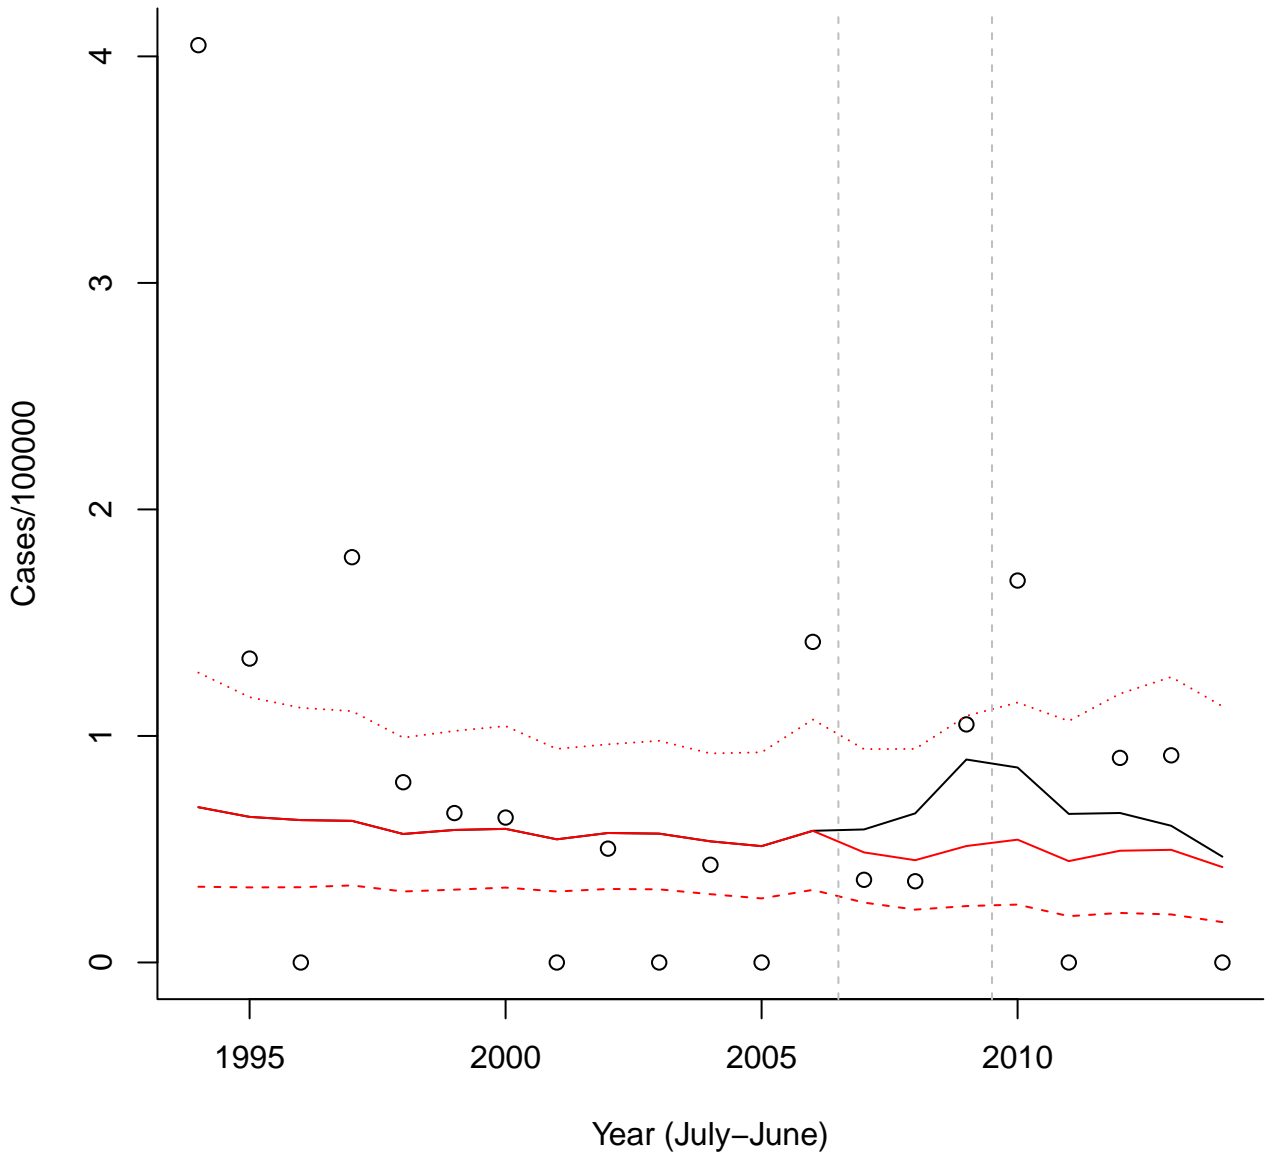

# 40–64y With comorbidity Serotype 23B

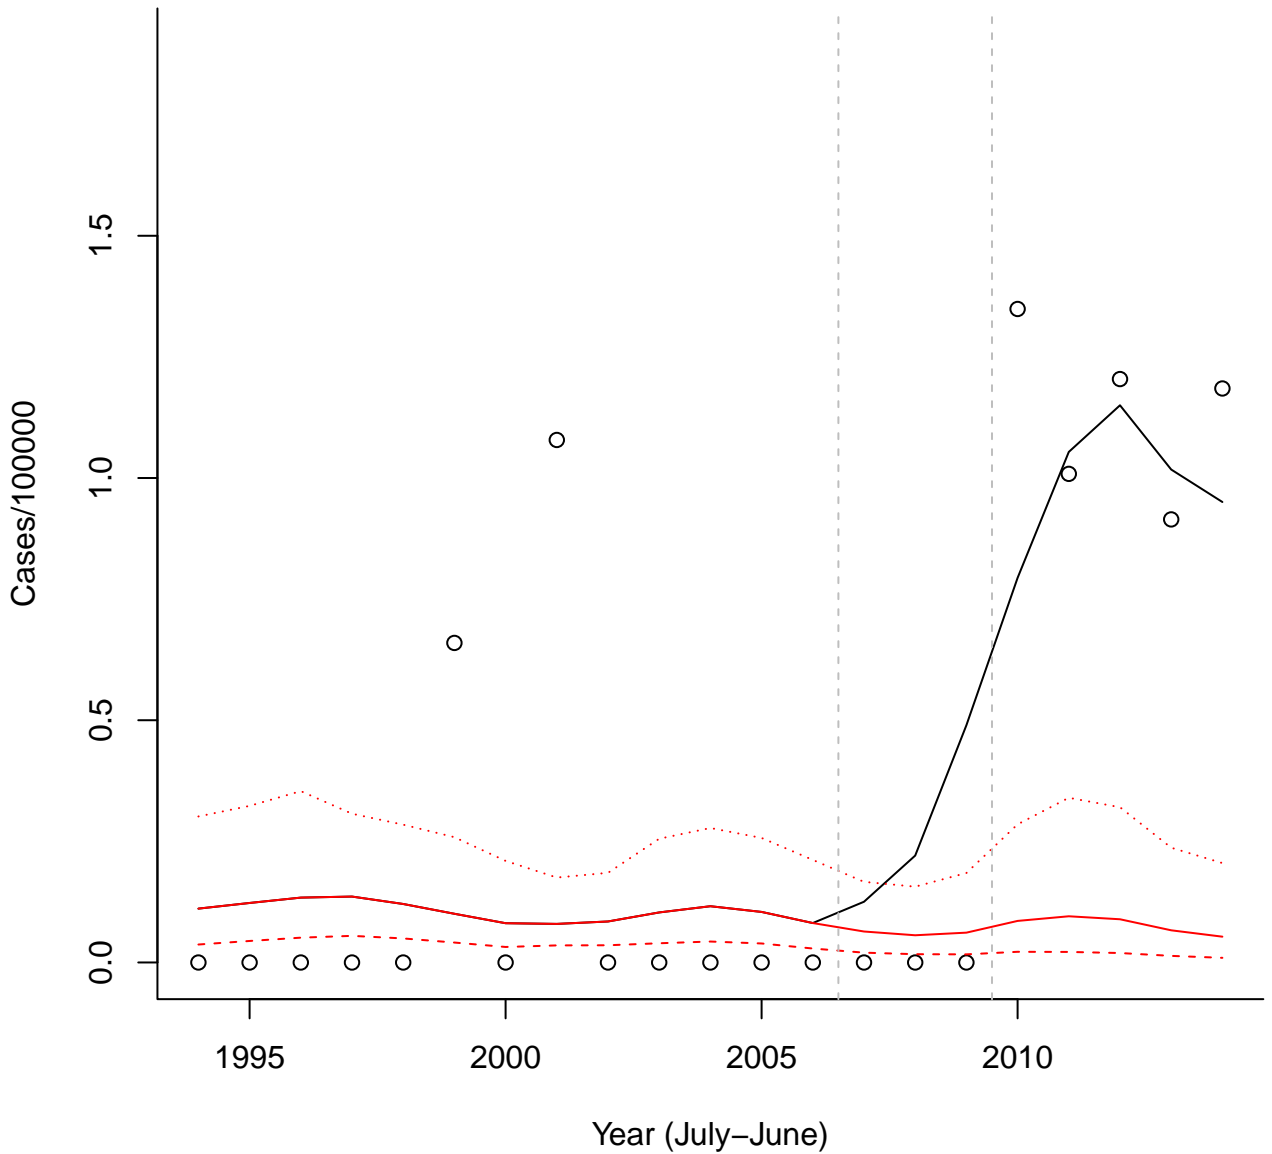

# 40-64y With comorbidity Serotype 23F

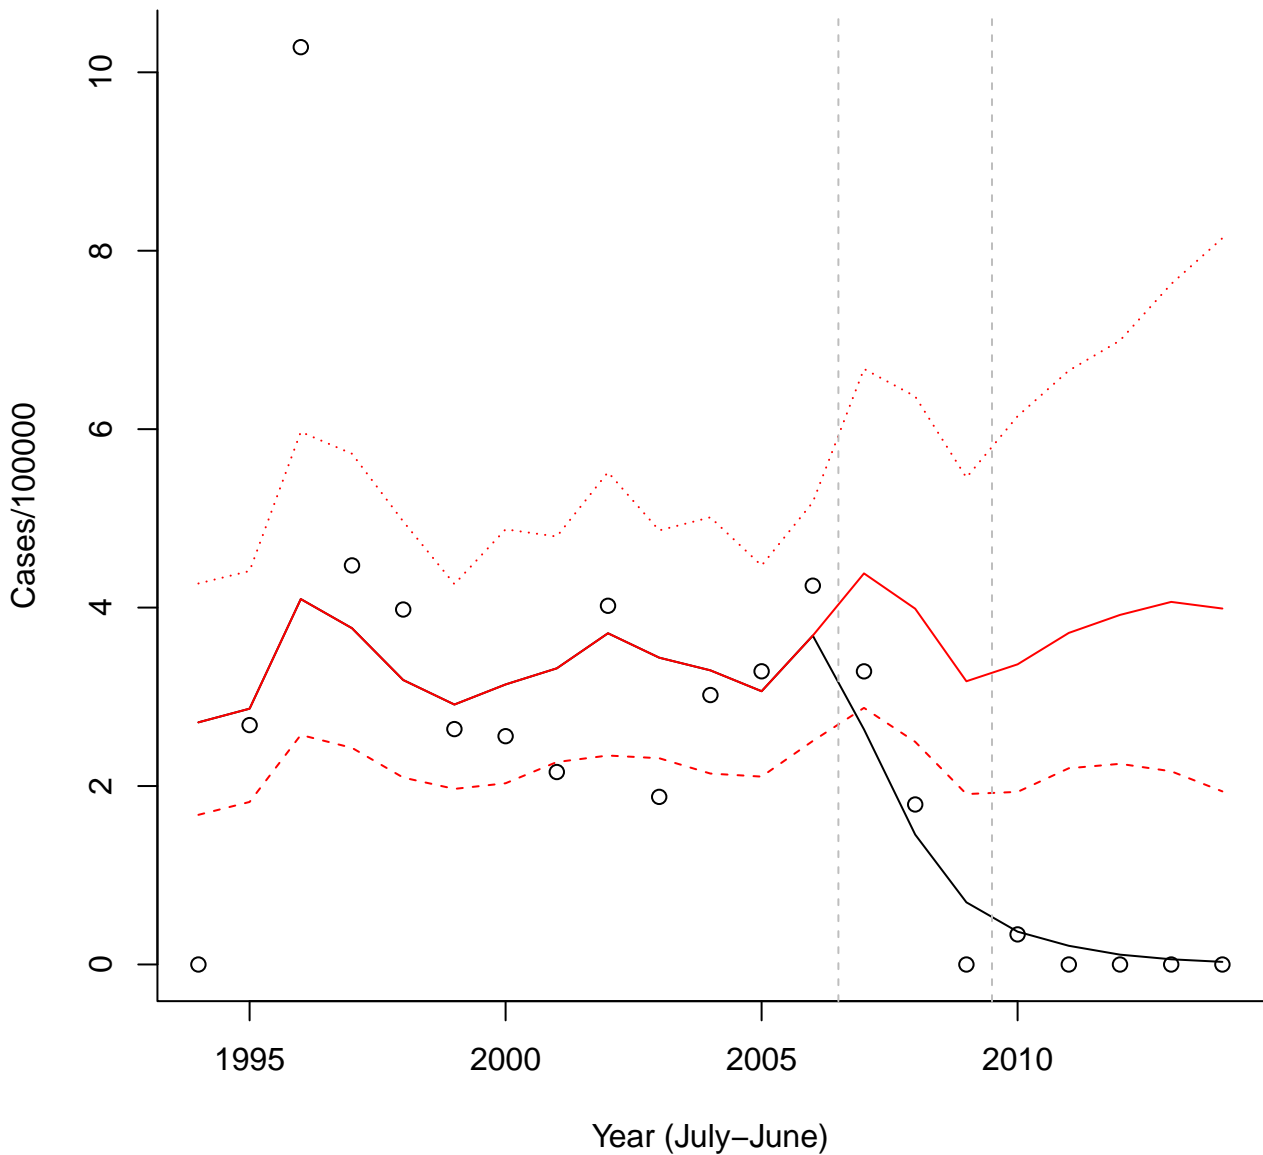

# 40-64y With comorbidity Serotype 24F

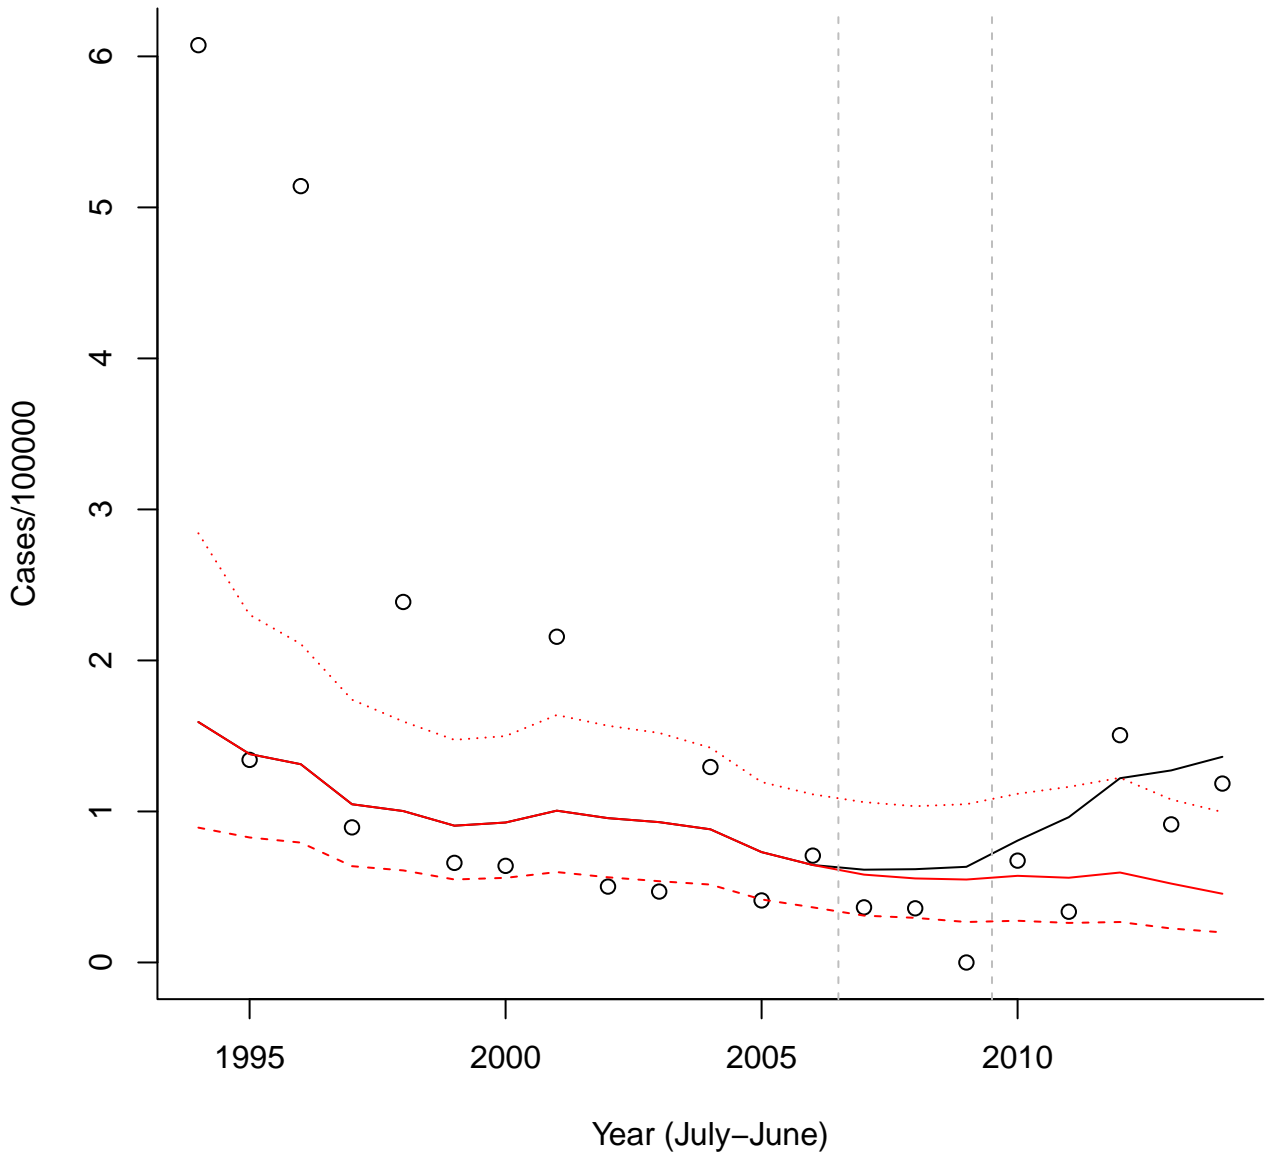

# 40–64y With comorbidity Serotype 25A

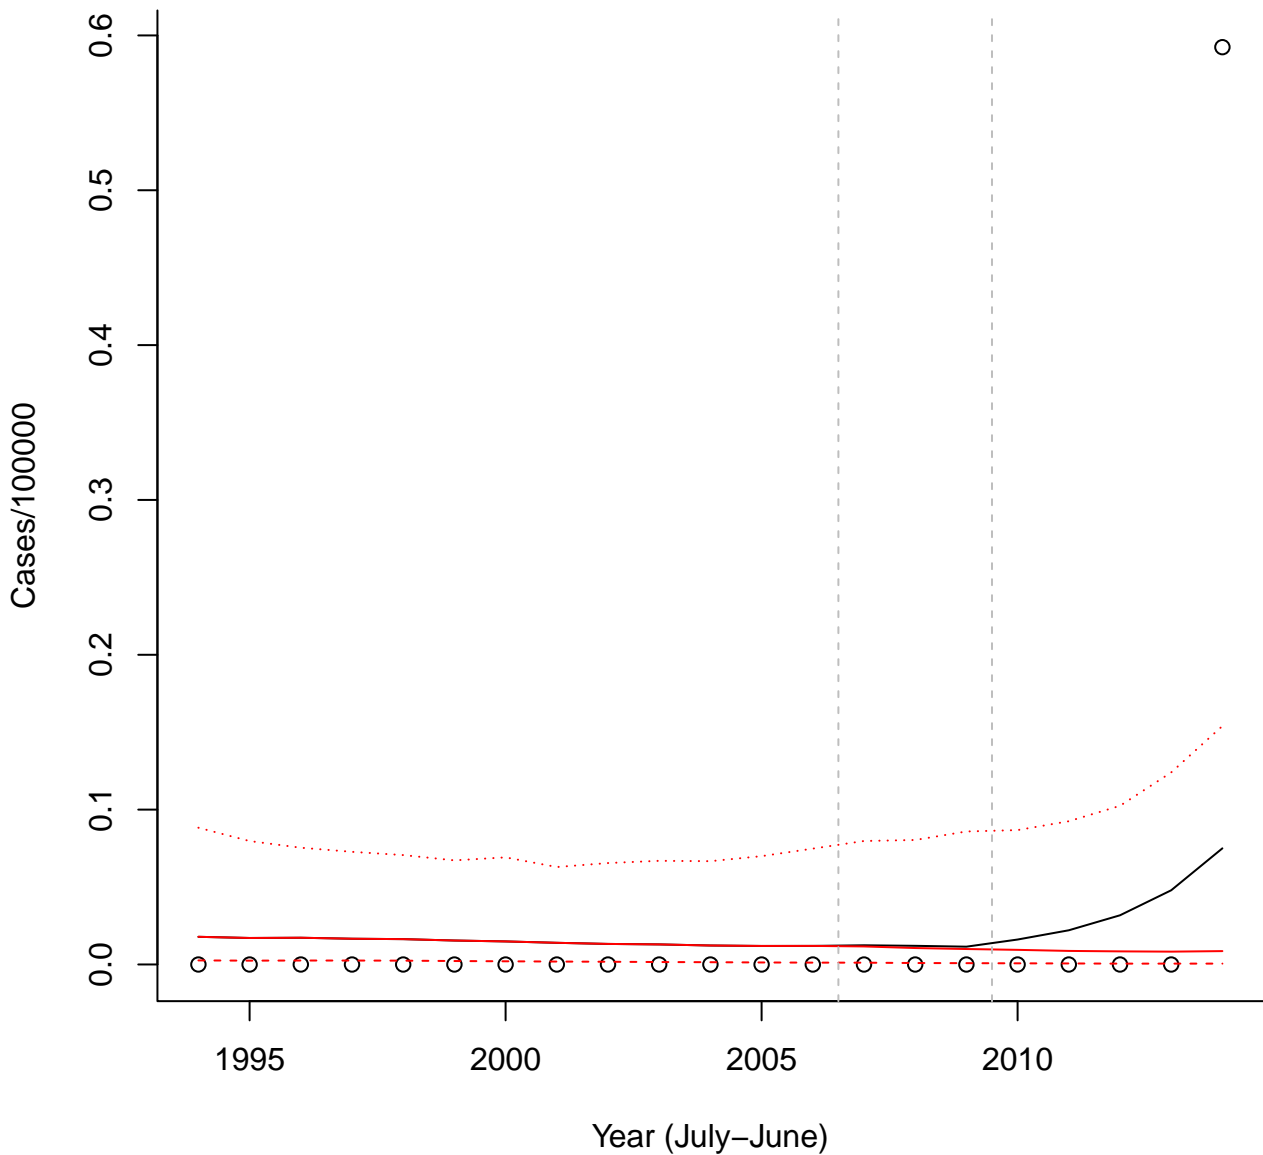

# 40–64y With comorbidity Serotype 25F

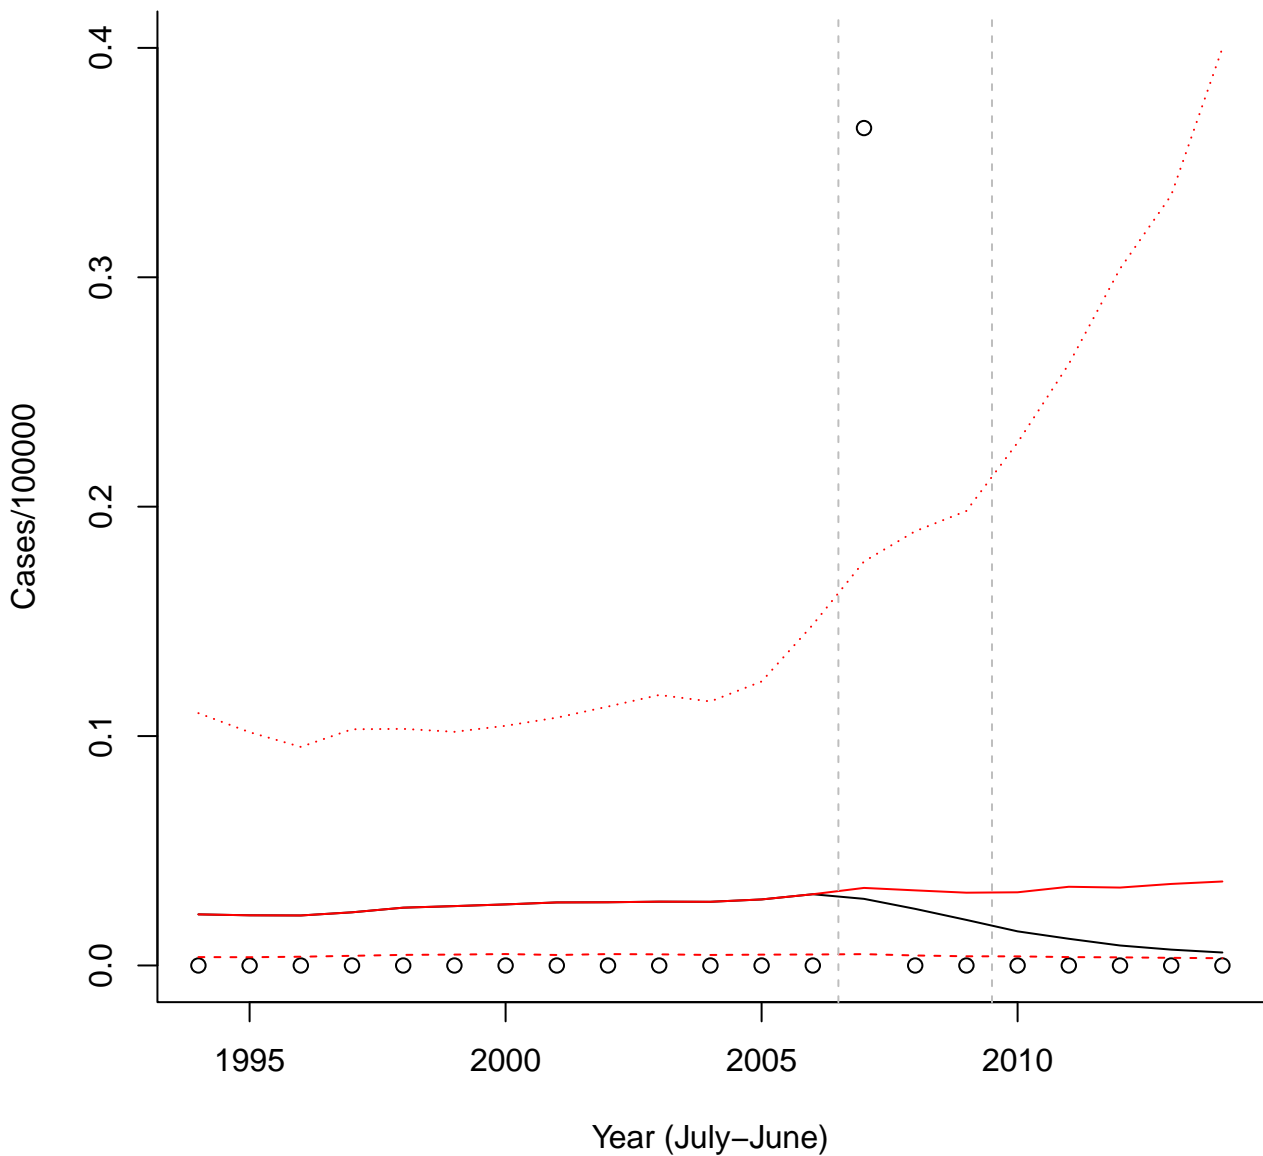



# 40-64y With comorbidity Serotype 28A

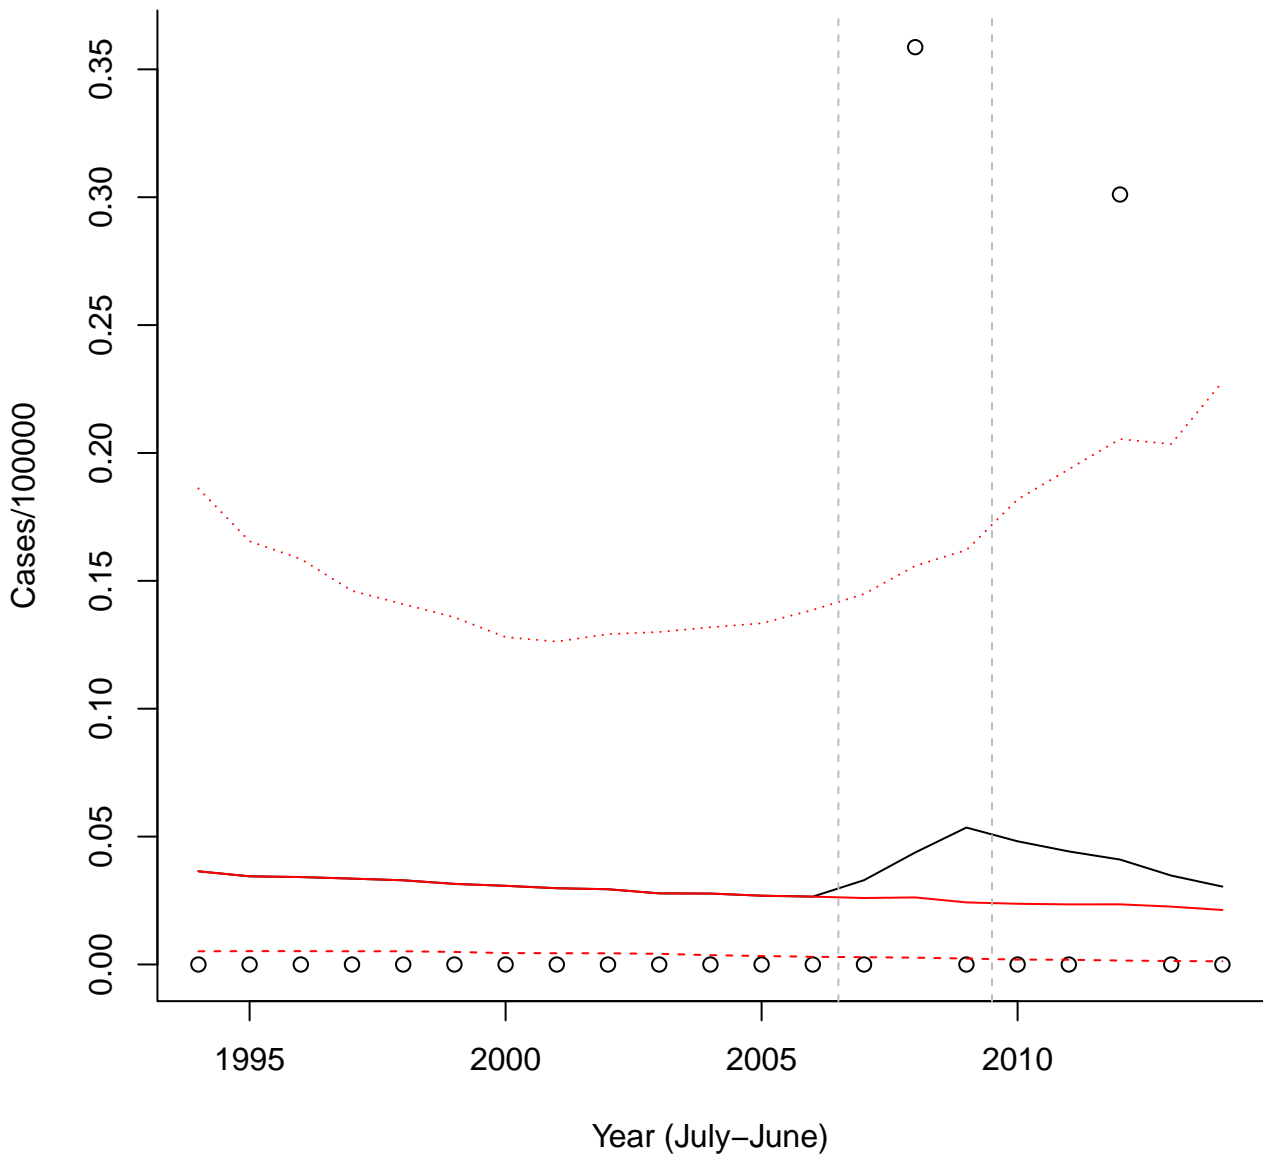

# 40–64y With comorbidity Serotype 29

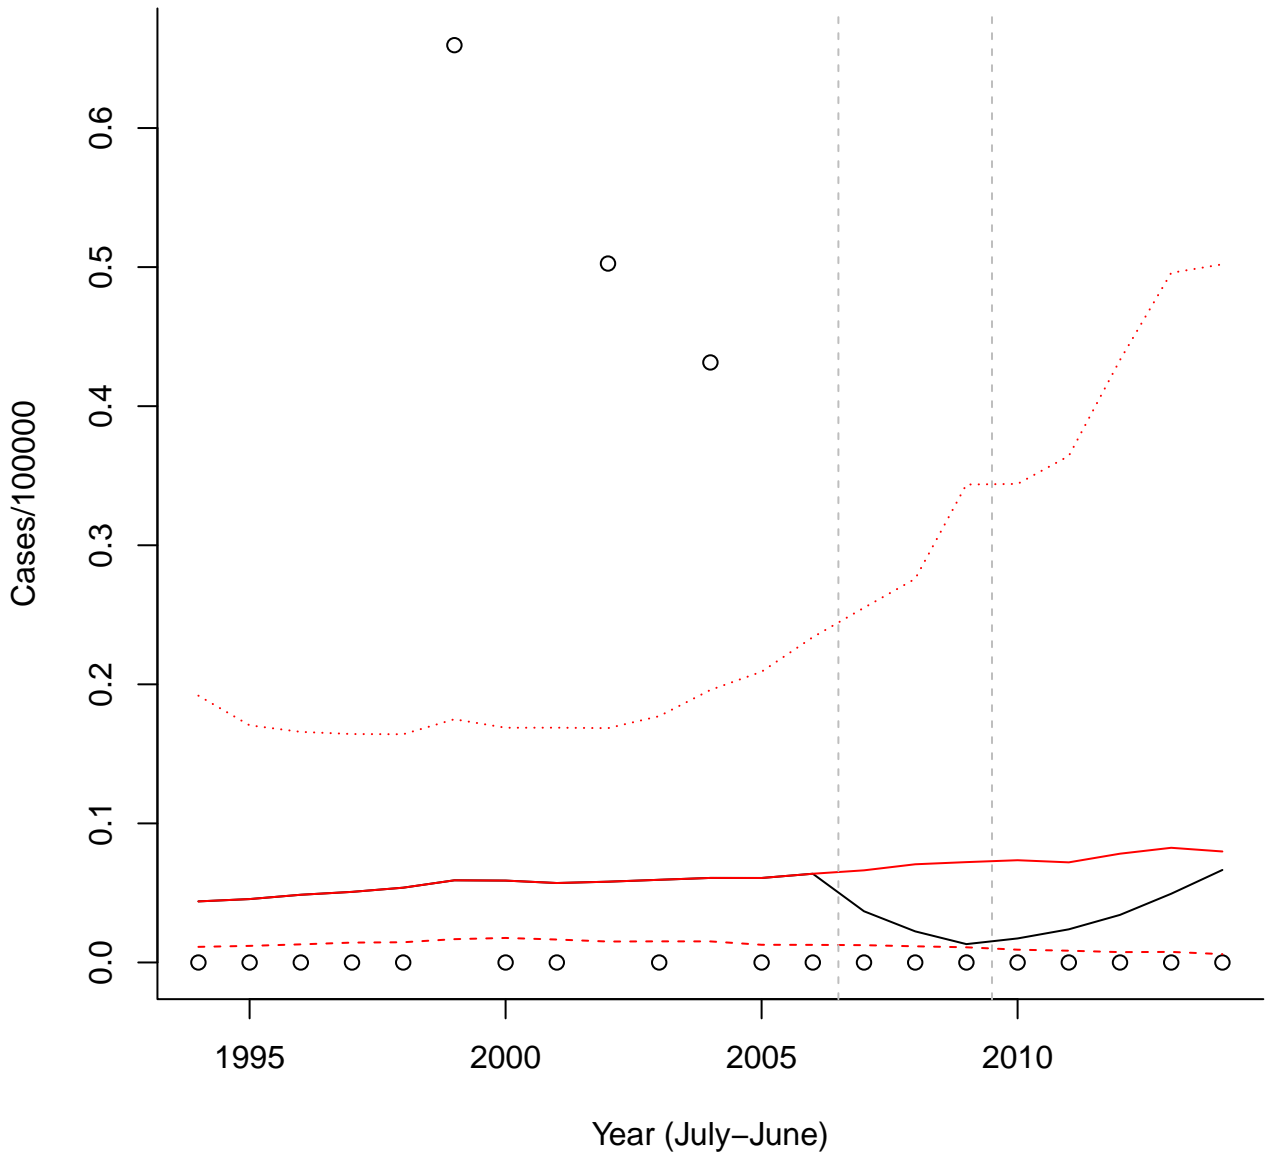

### 40–64y With comorbidity Serotype 3

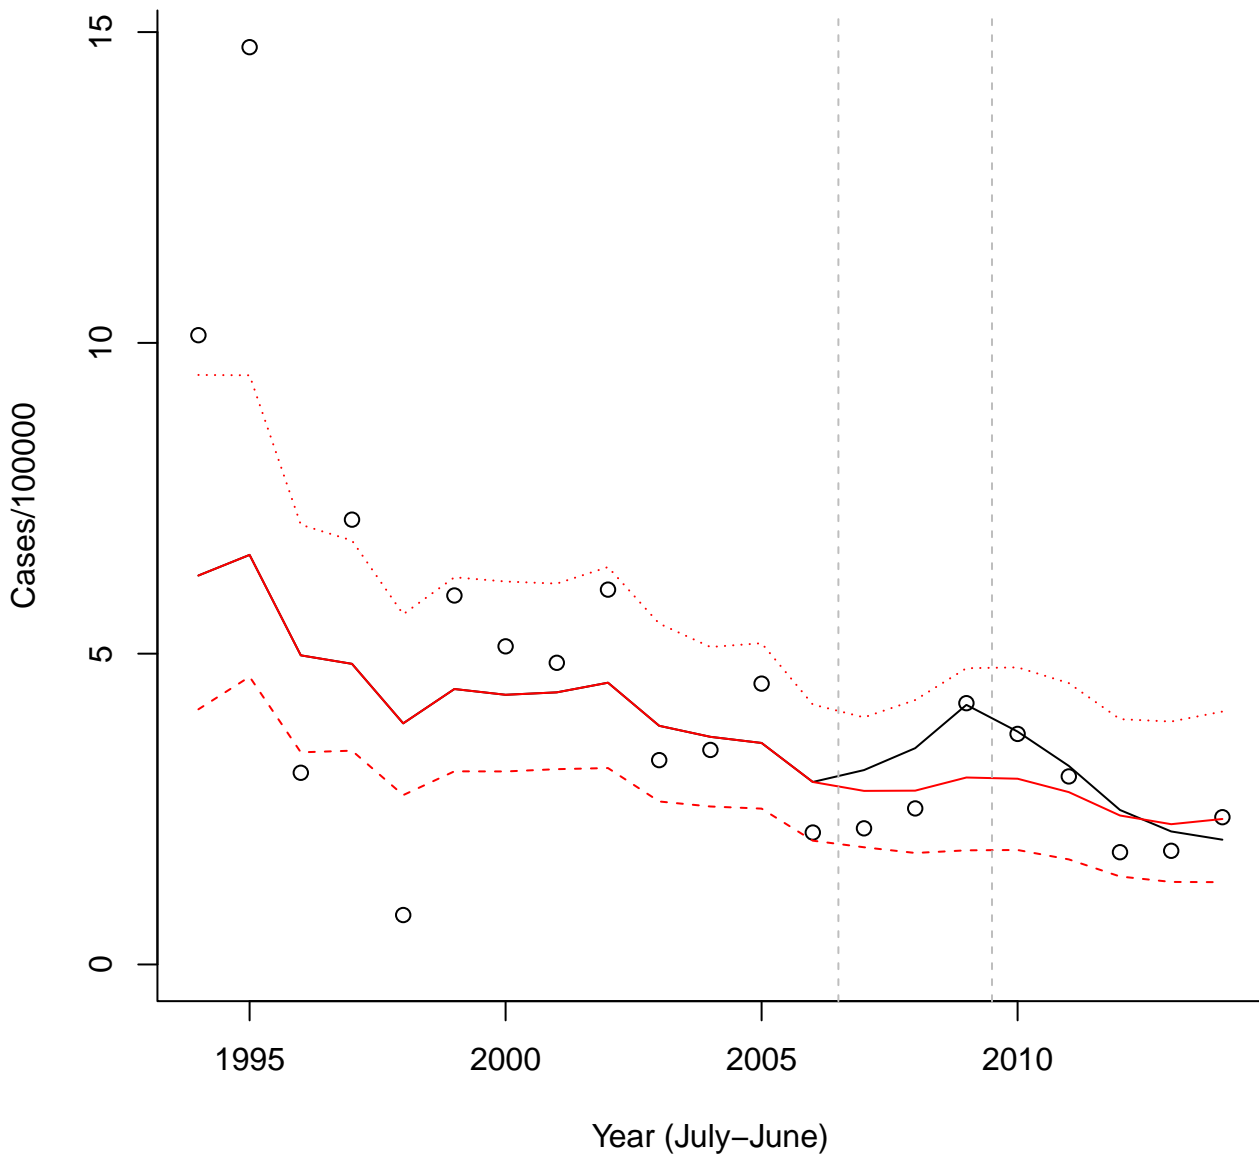

# 40–64y With comorbidity Serotype 31

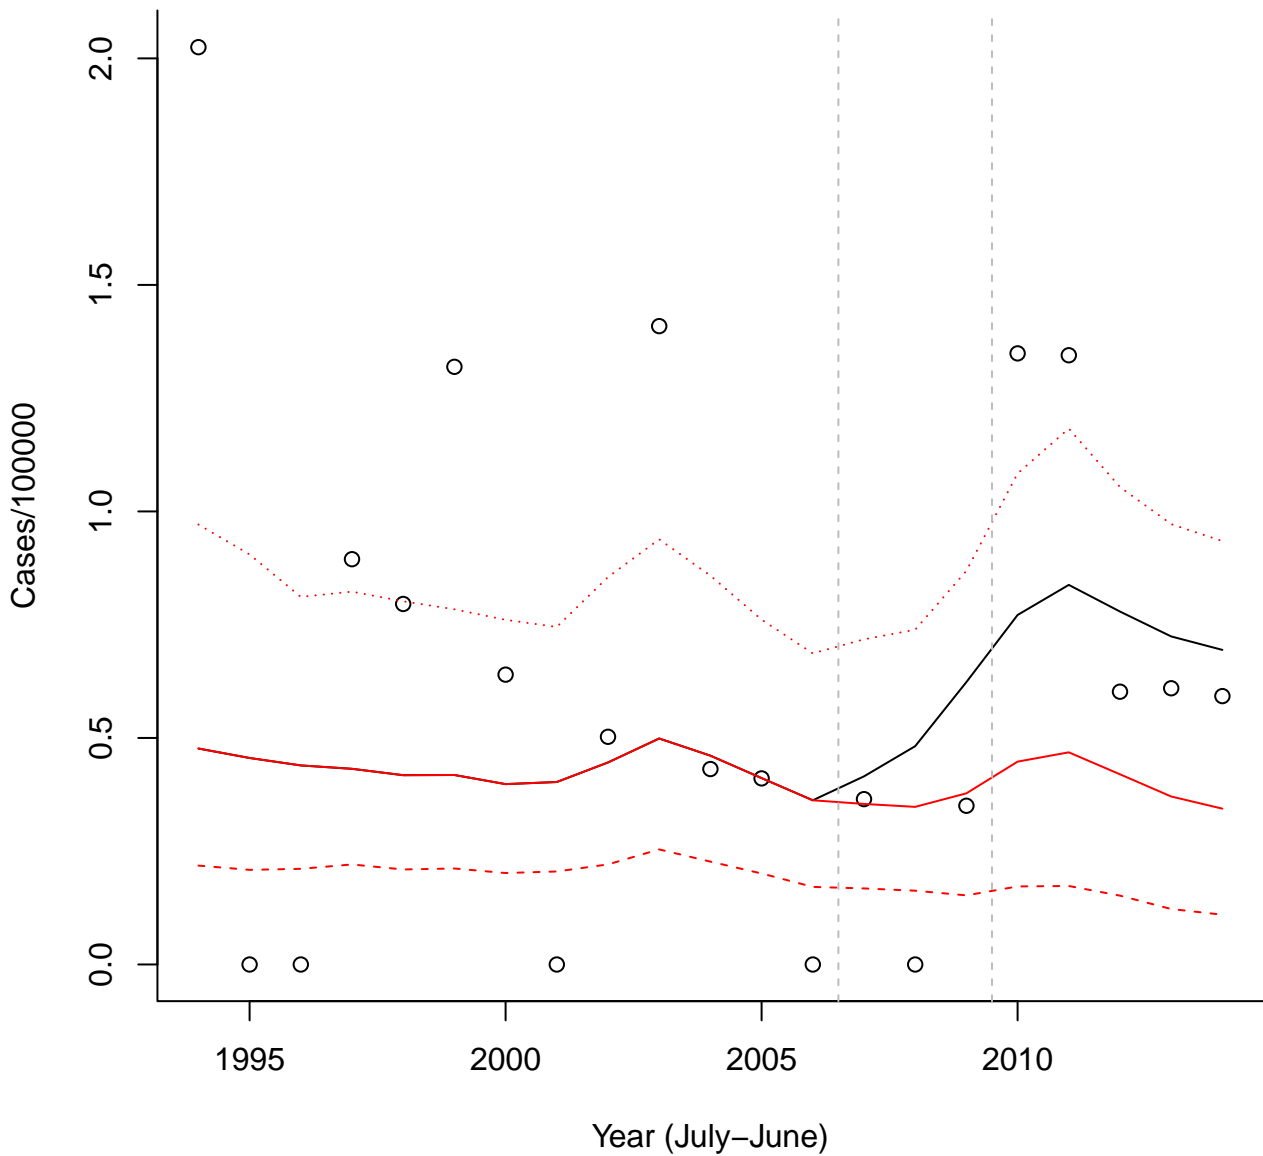

# 40-64y With comorbidity Serotype 33F

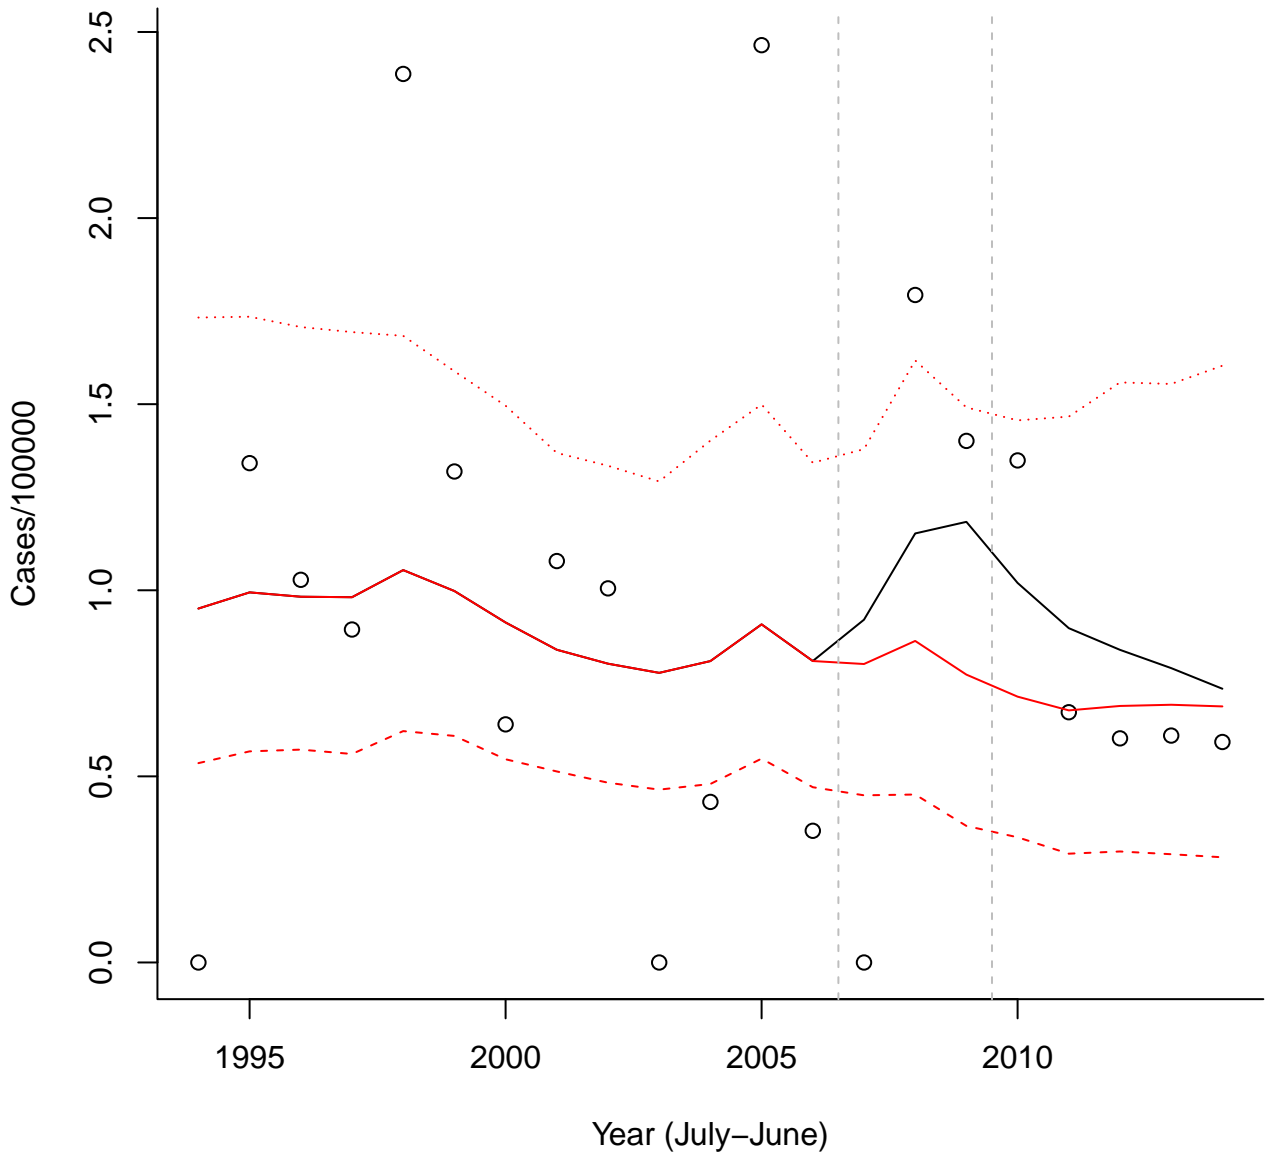

# 40–64y With comorbidity Serotype 34

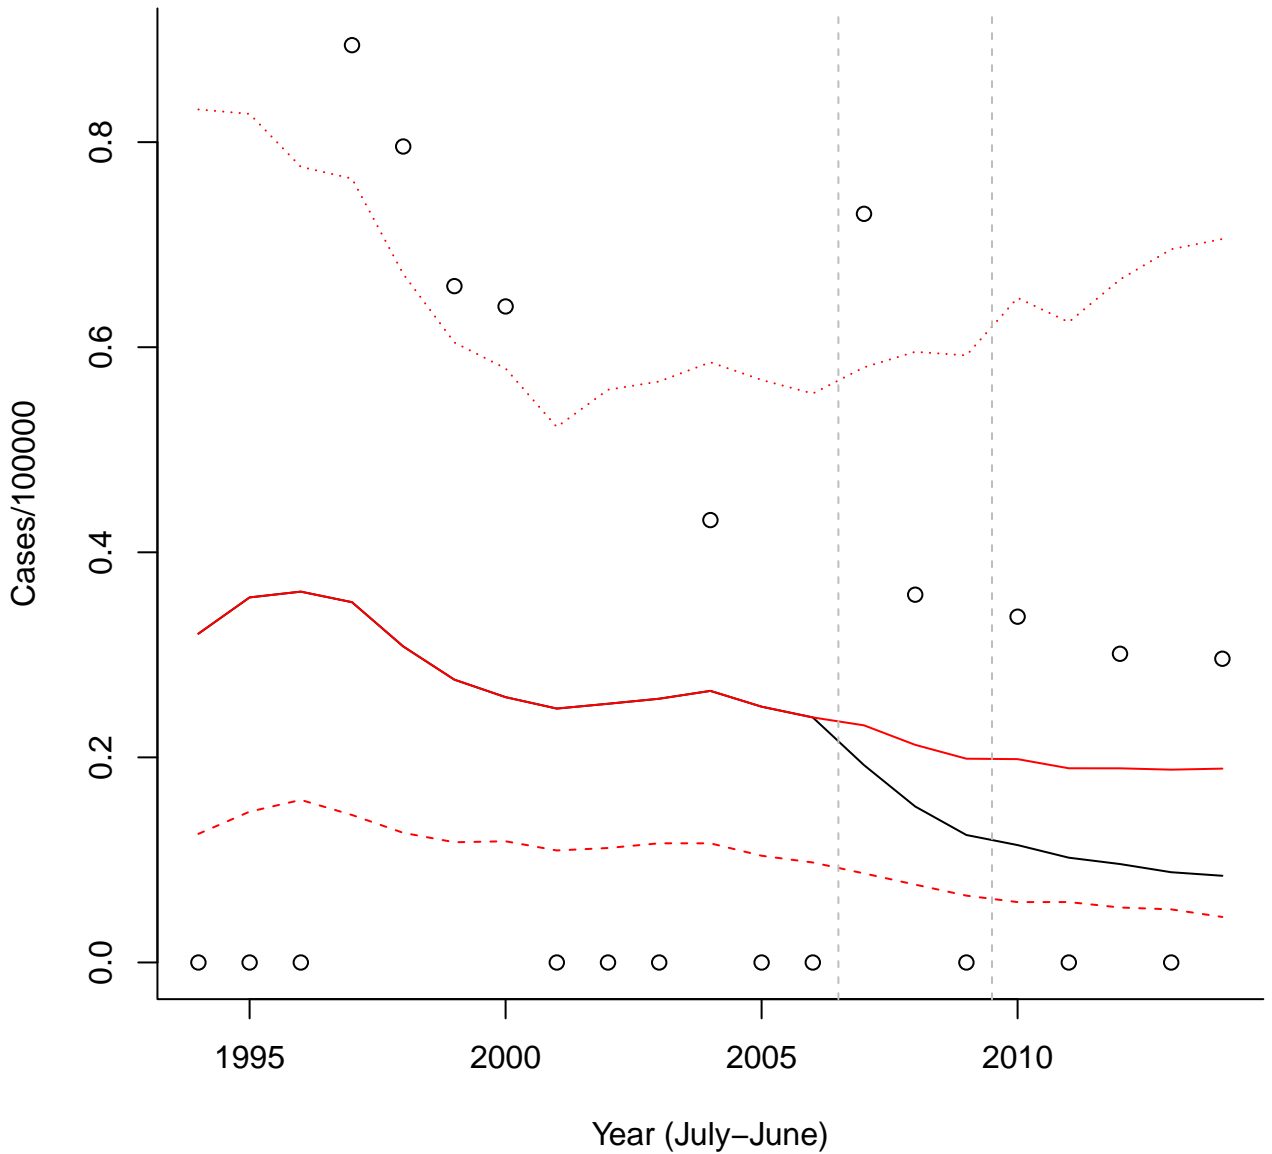

# 40–64y With comorbidity Serotype 35B

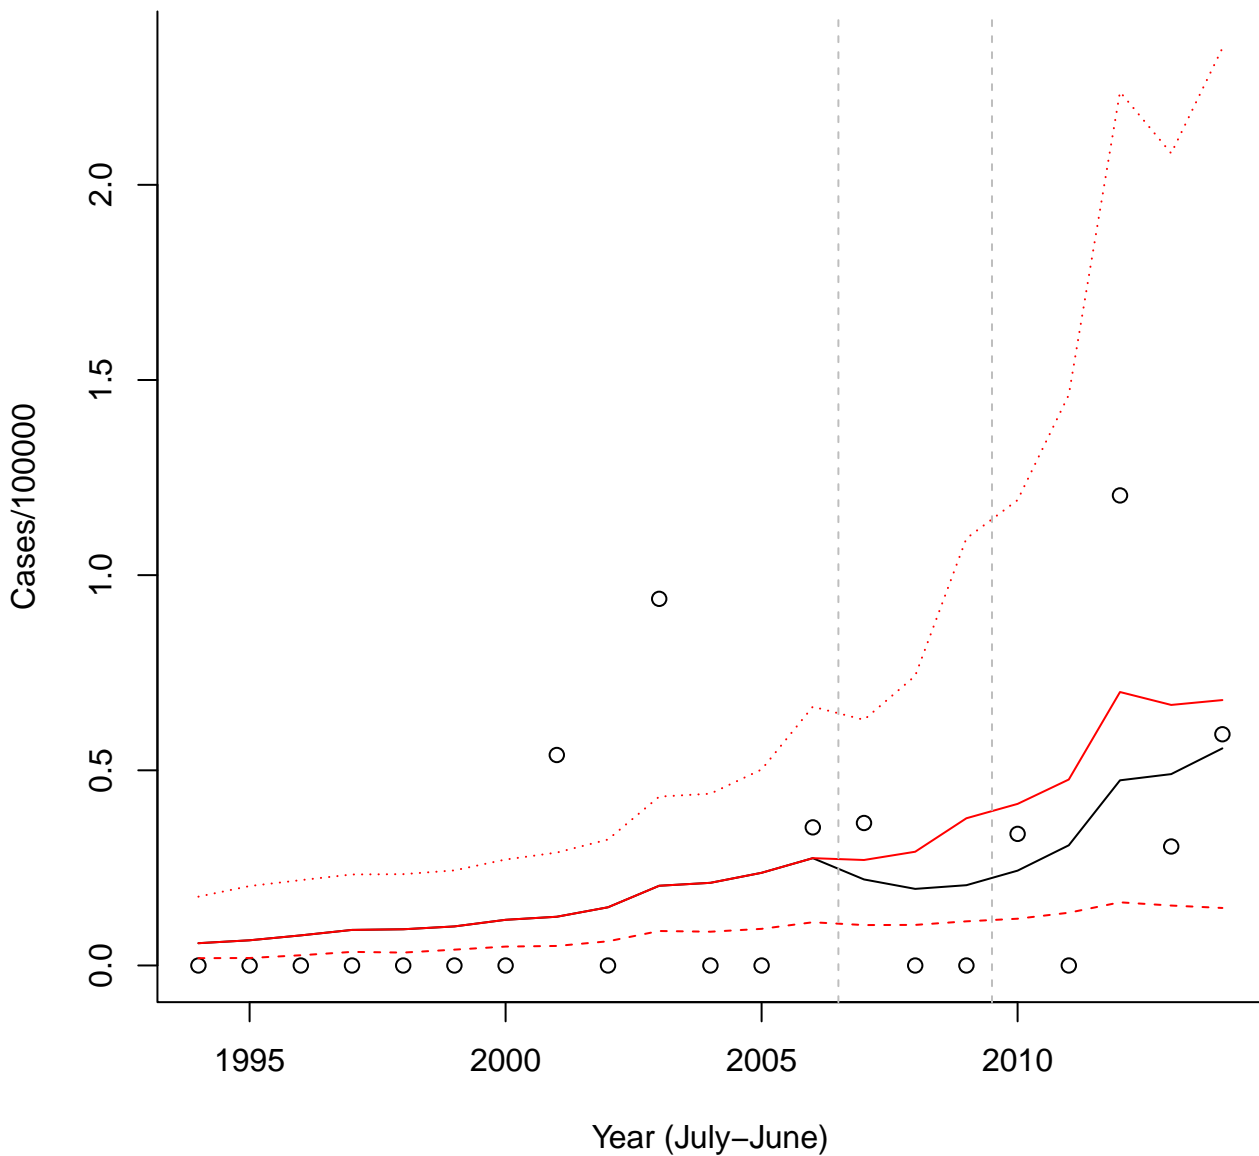

# 40-64y With comorbidity Serotype 35C

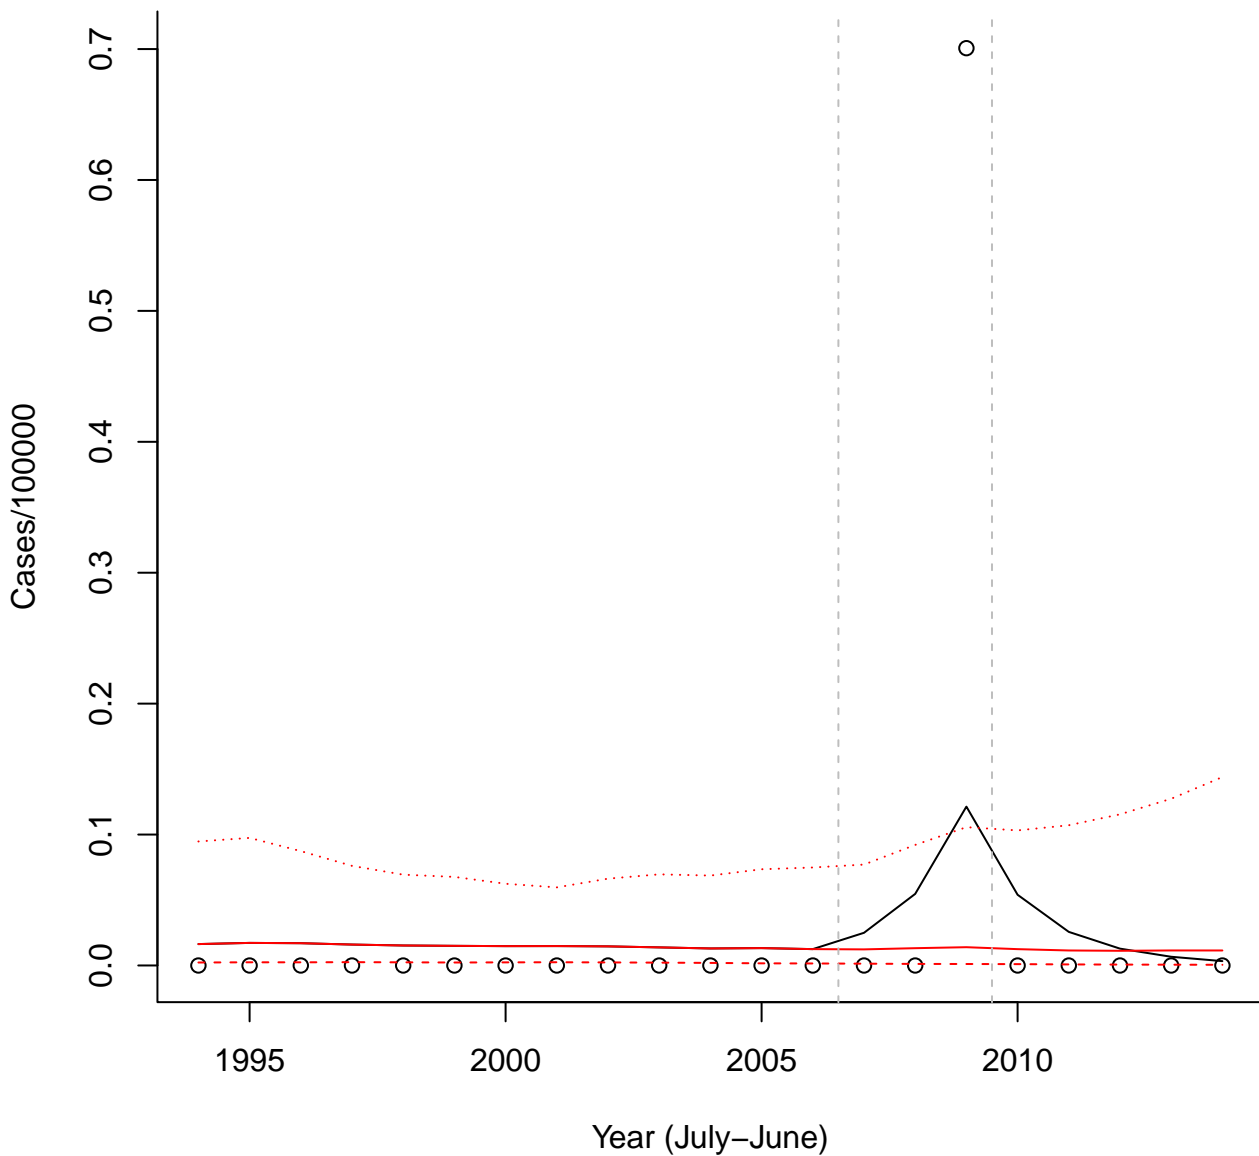



# 40-64y With comorbidity Serotype 35F

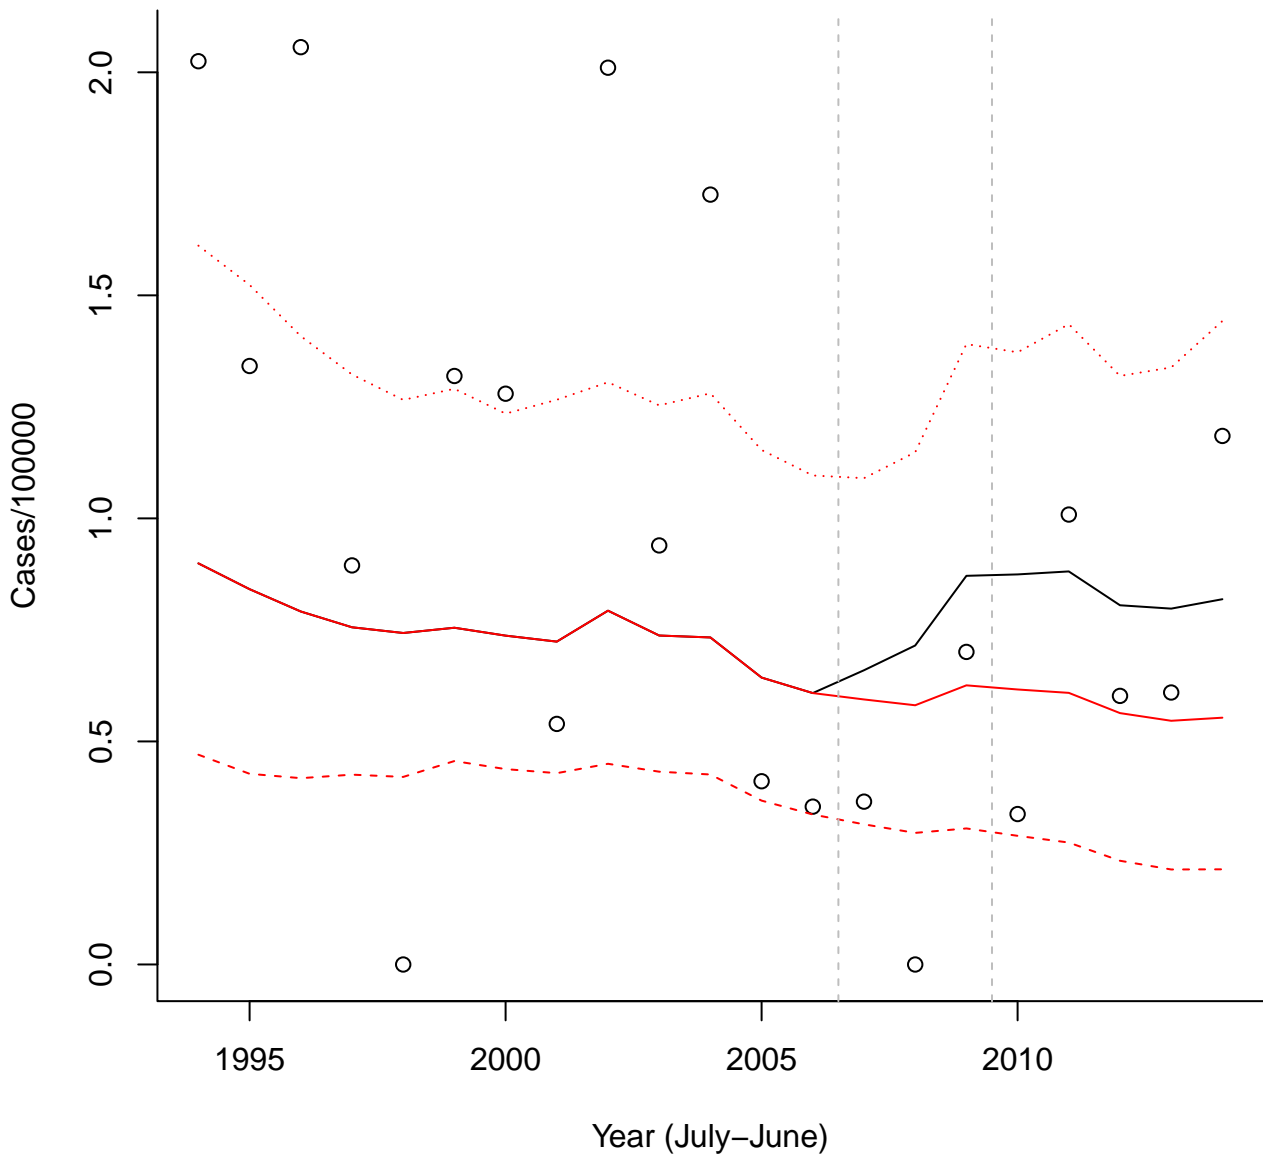

# 40–64y With comorbidity Serotype 37

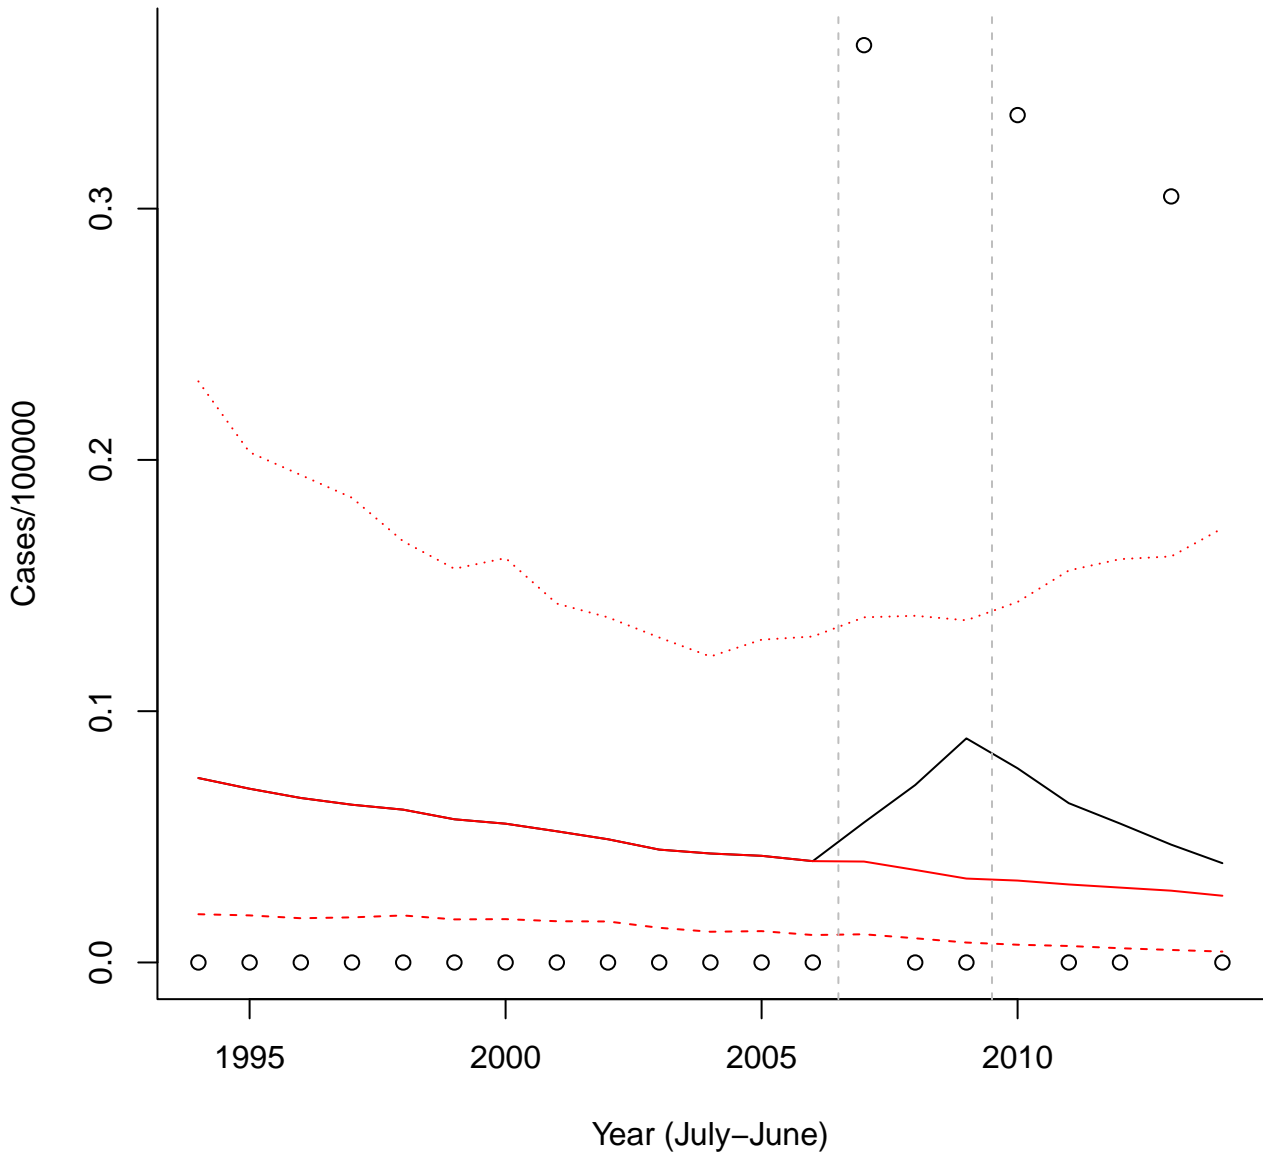

# 40–64y With comorbidity Serotype 38

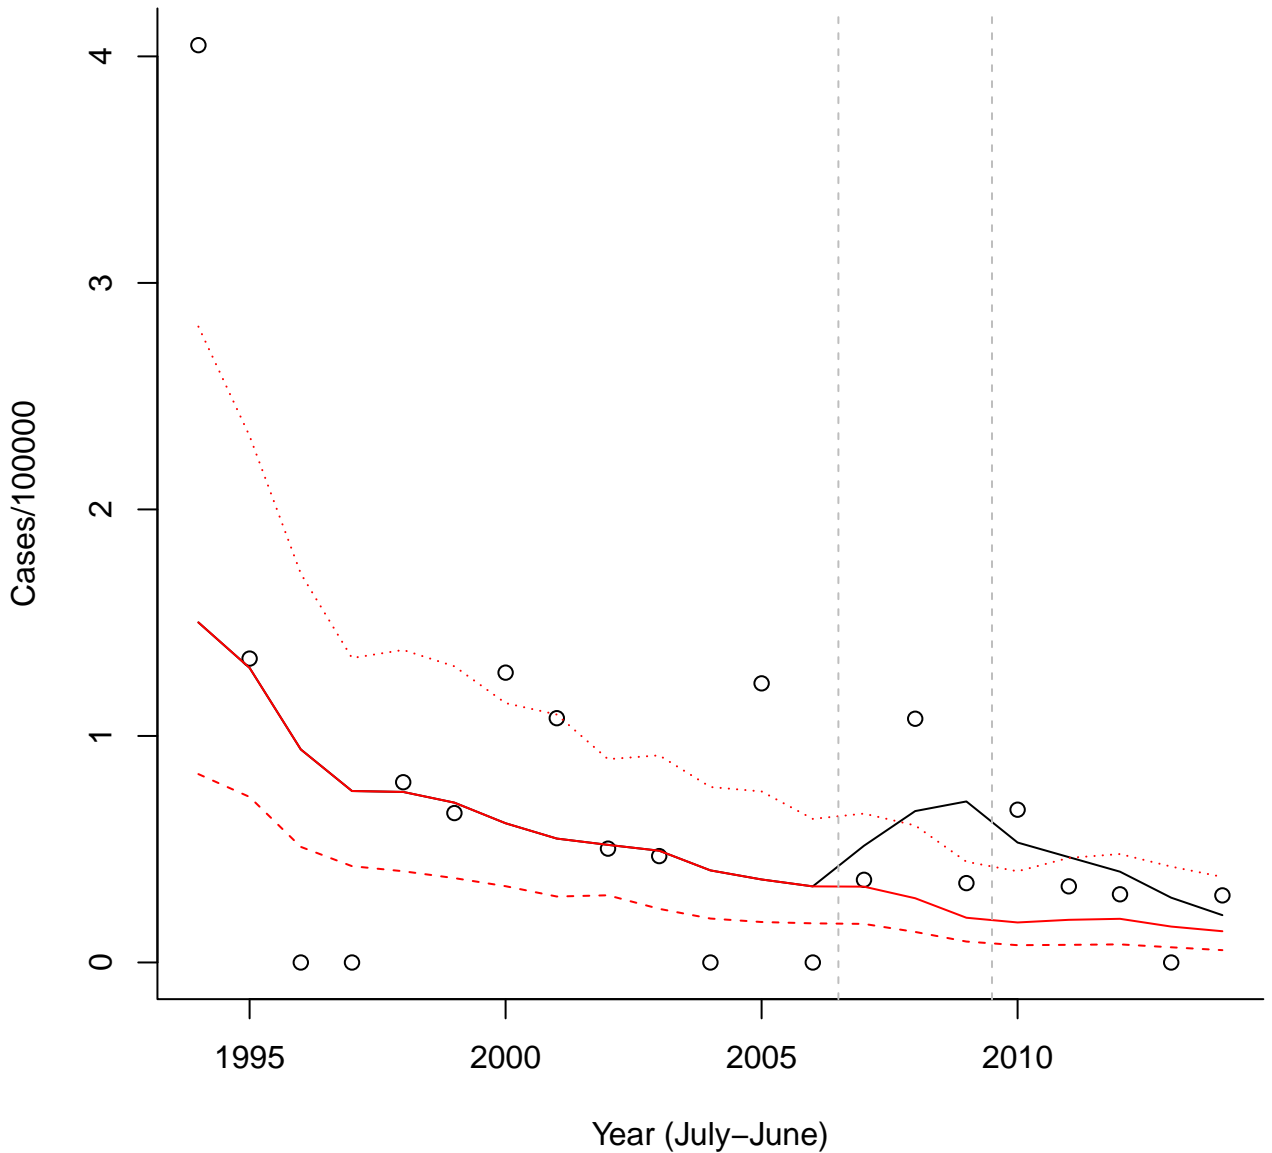

### 40–64y With comorbidity Serotype 4

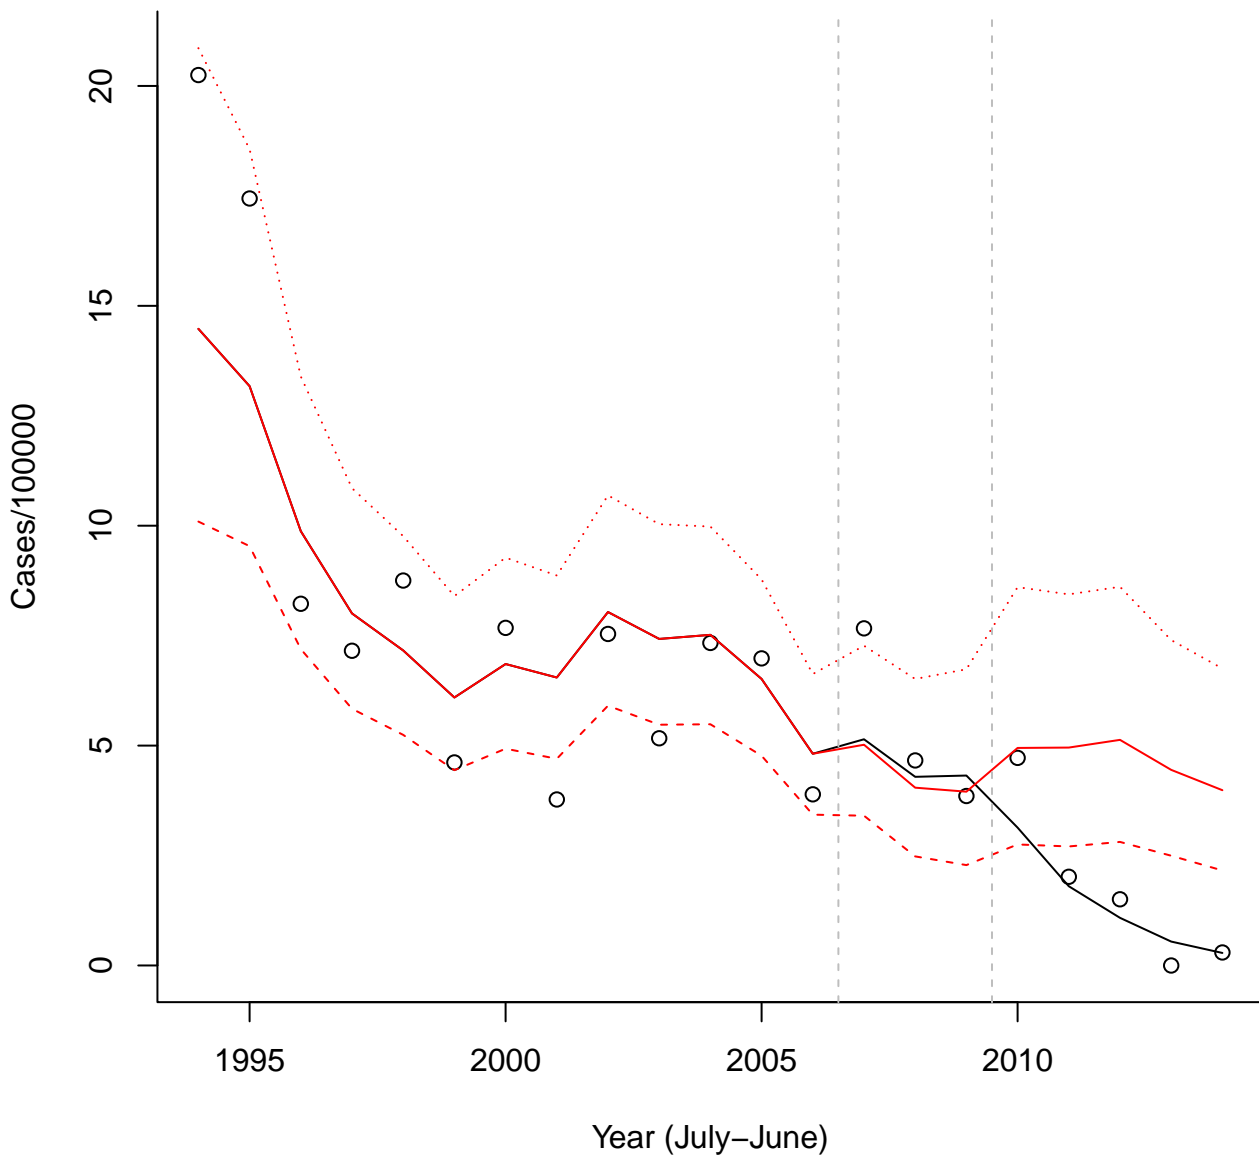

# 40–64y With comorbidity Serotype 42

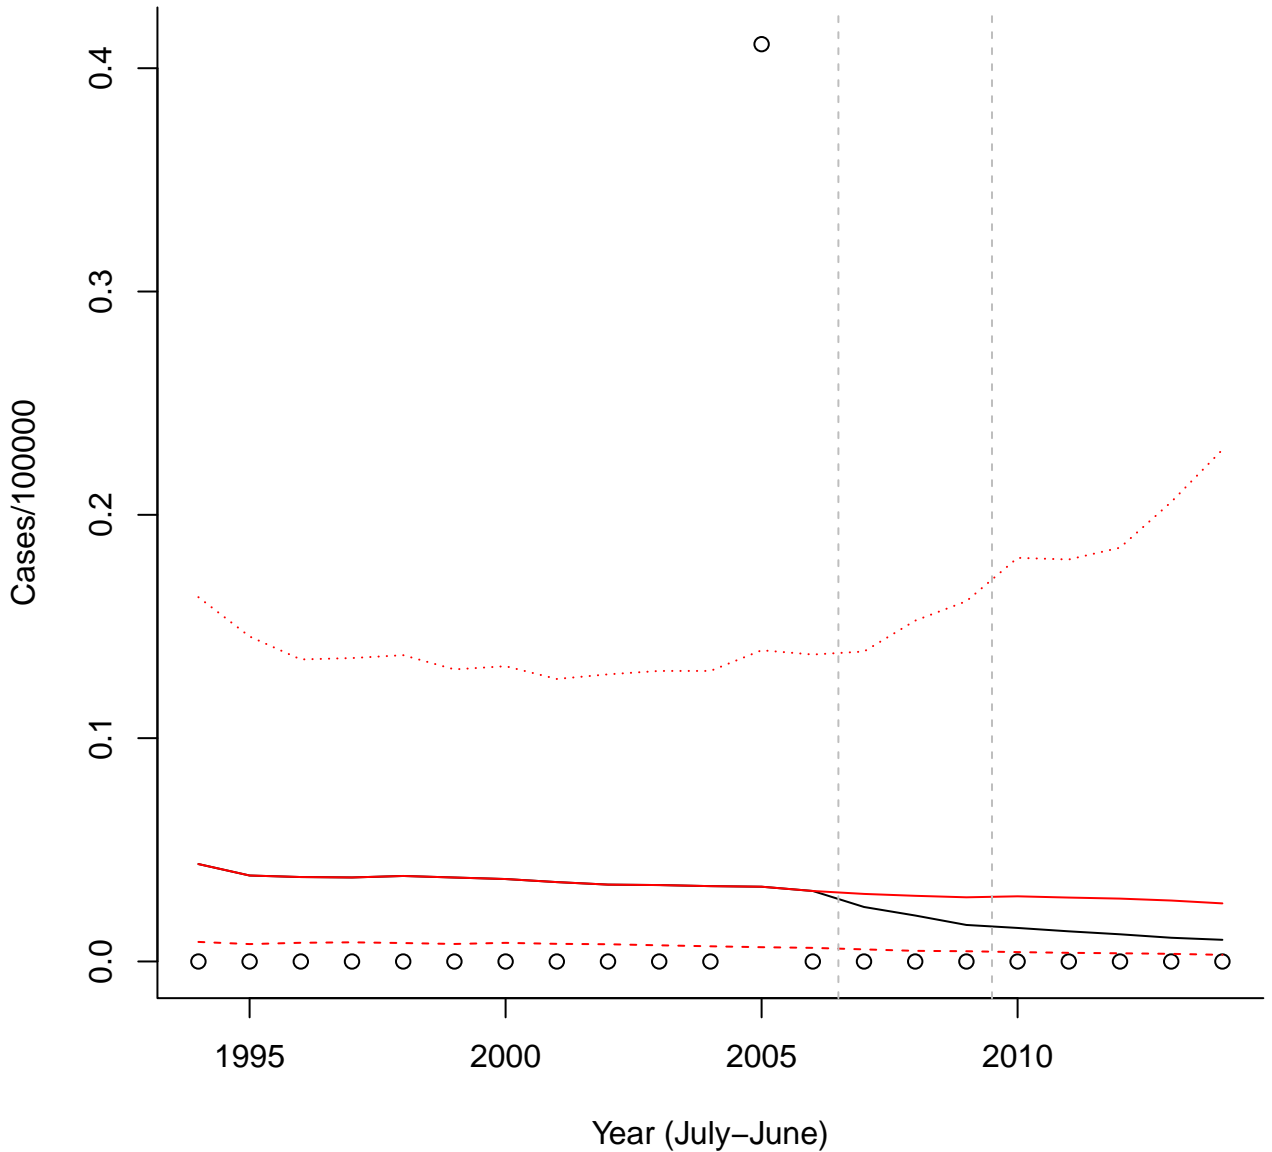

# 40–64y With comorbidity Serotype 5

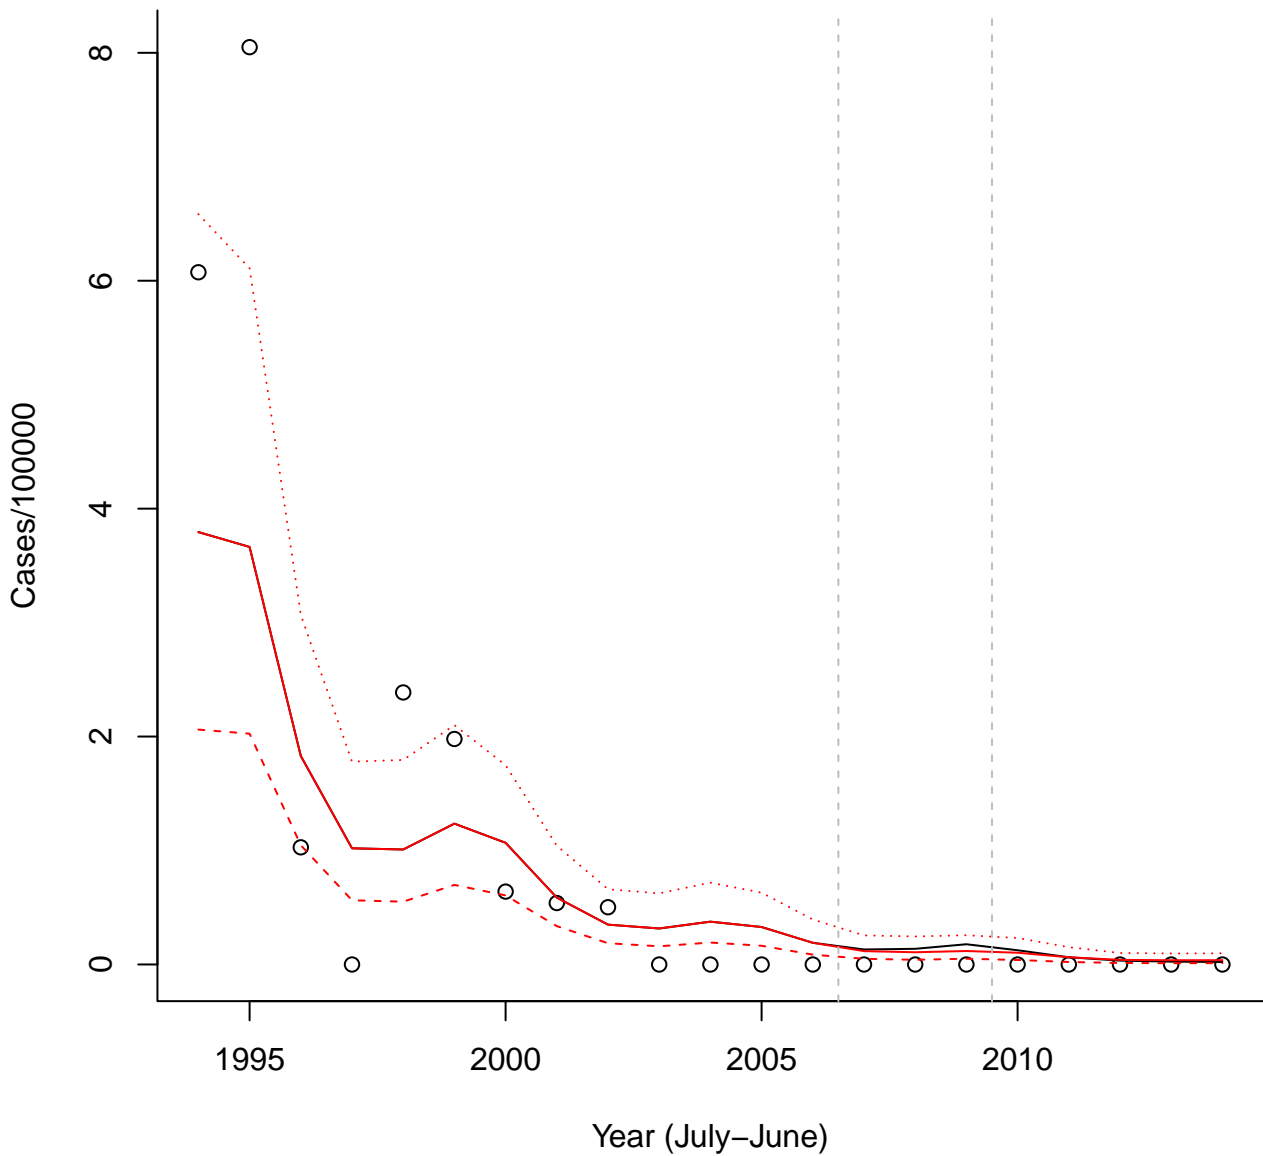

# 40–64y With comorbidity Serotype 6A

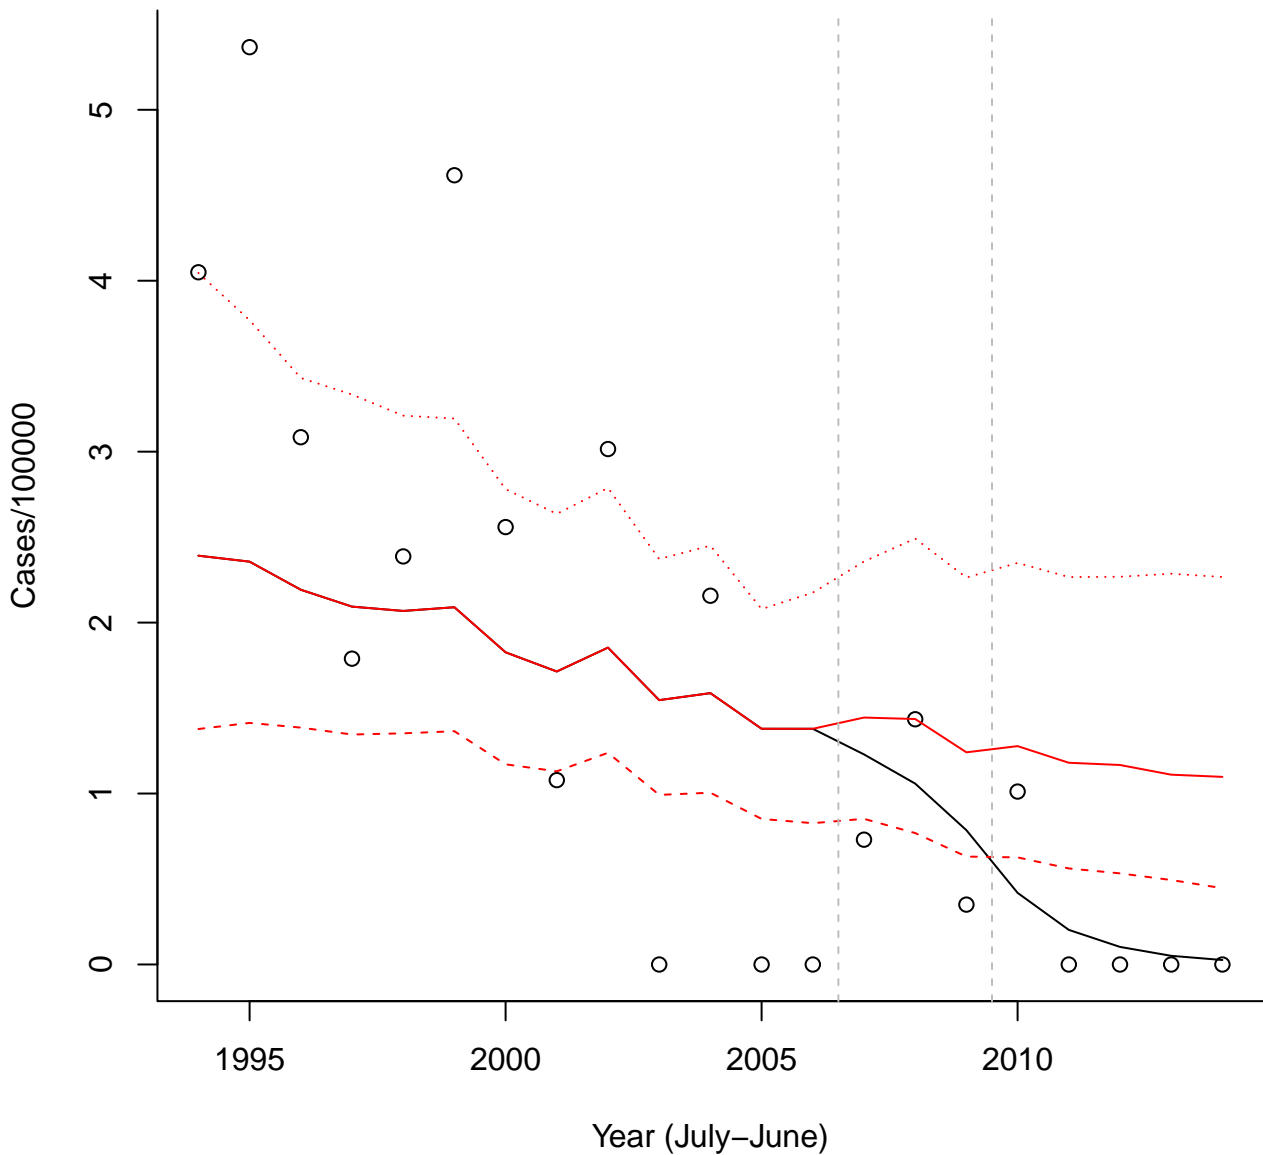

# 40–64y With comorbidity Serotype 6B

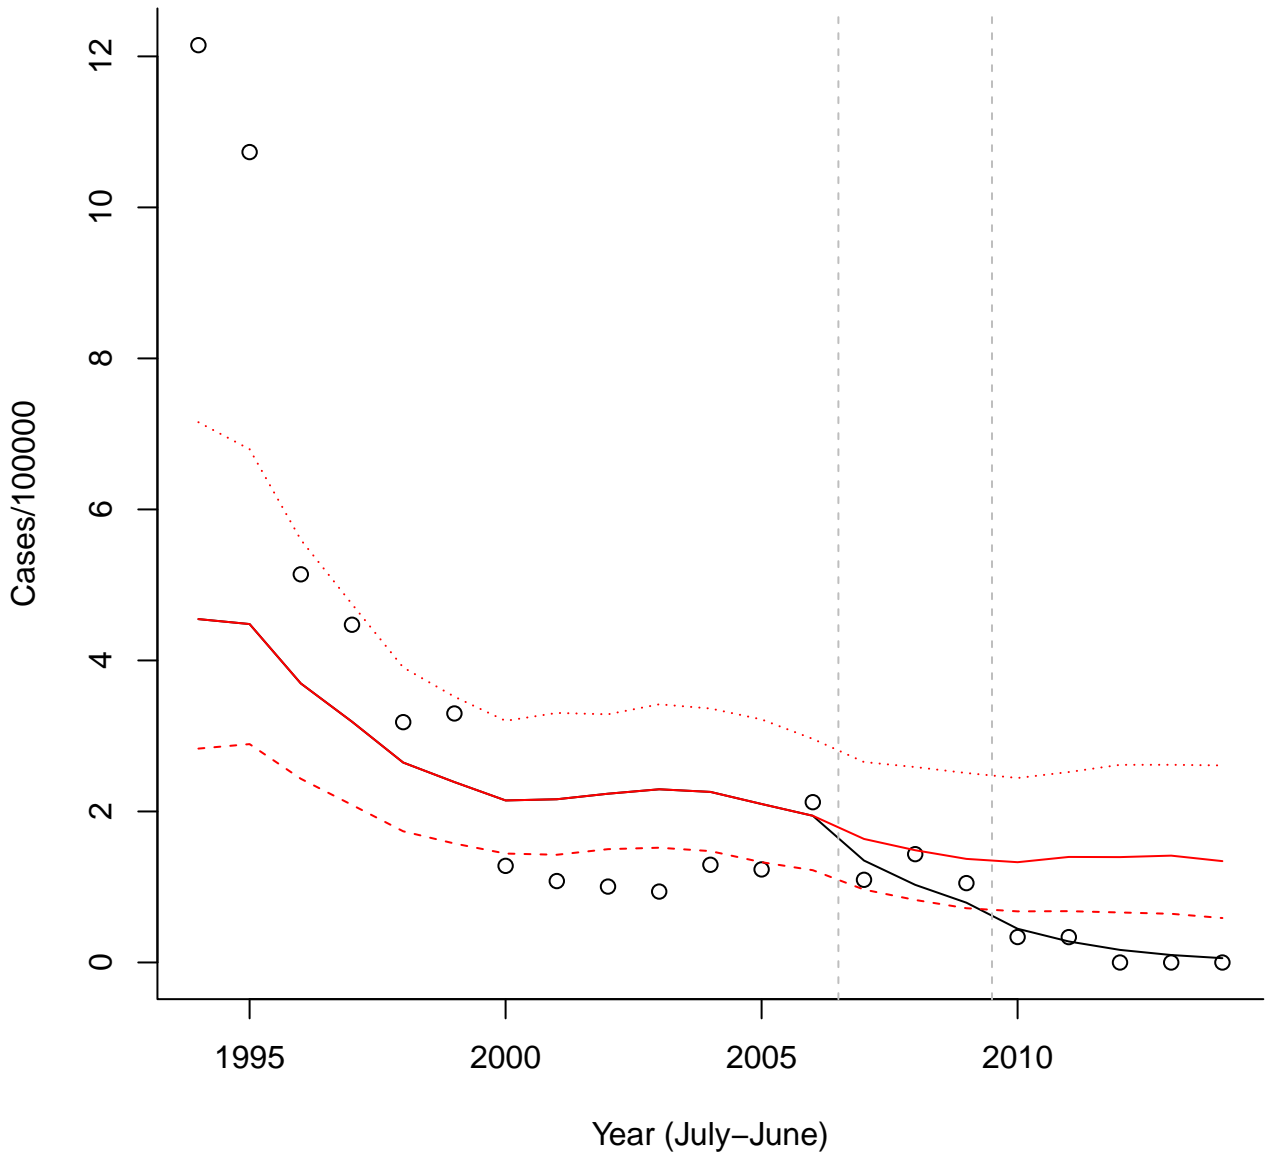



# 40–64y With comorbidity Serotype 6C

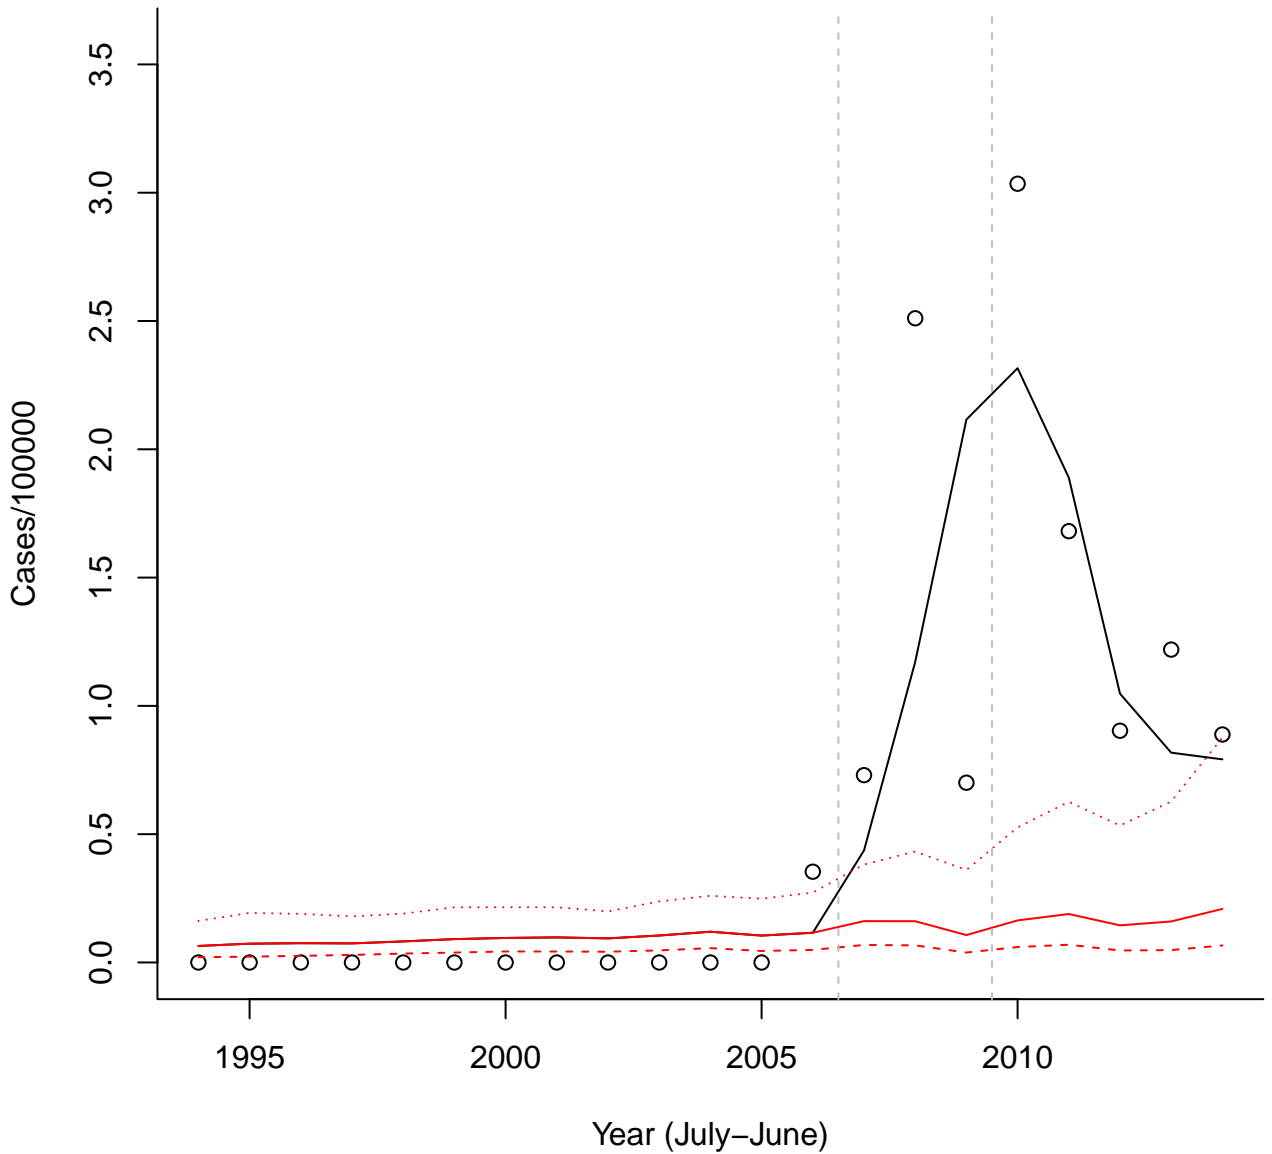

# 40–64y With comorbidity Serotype 7C

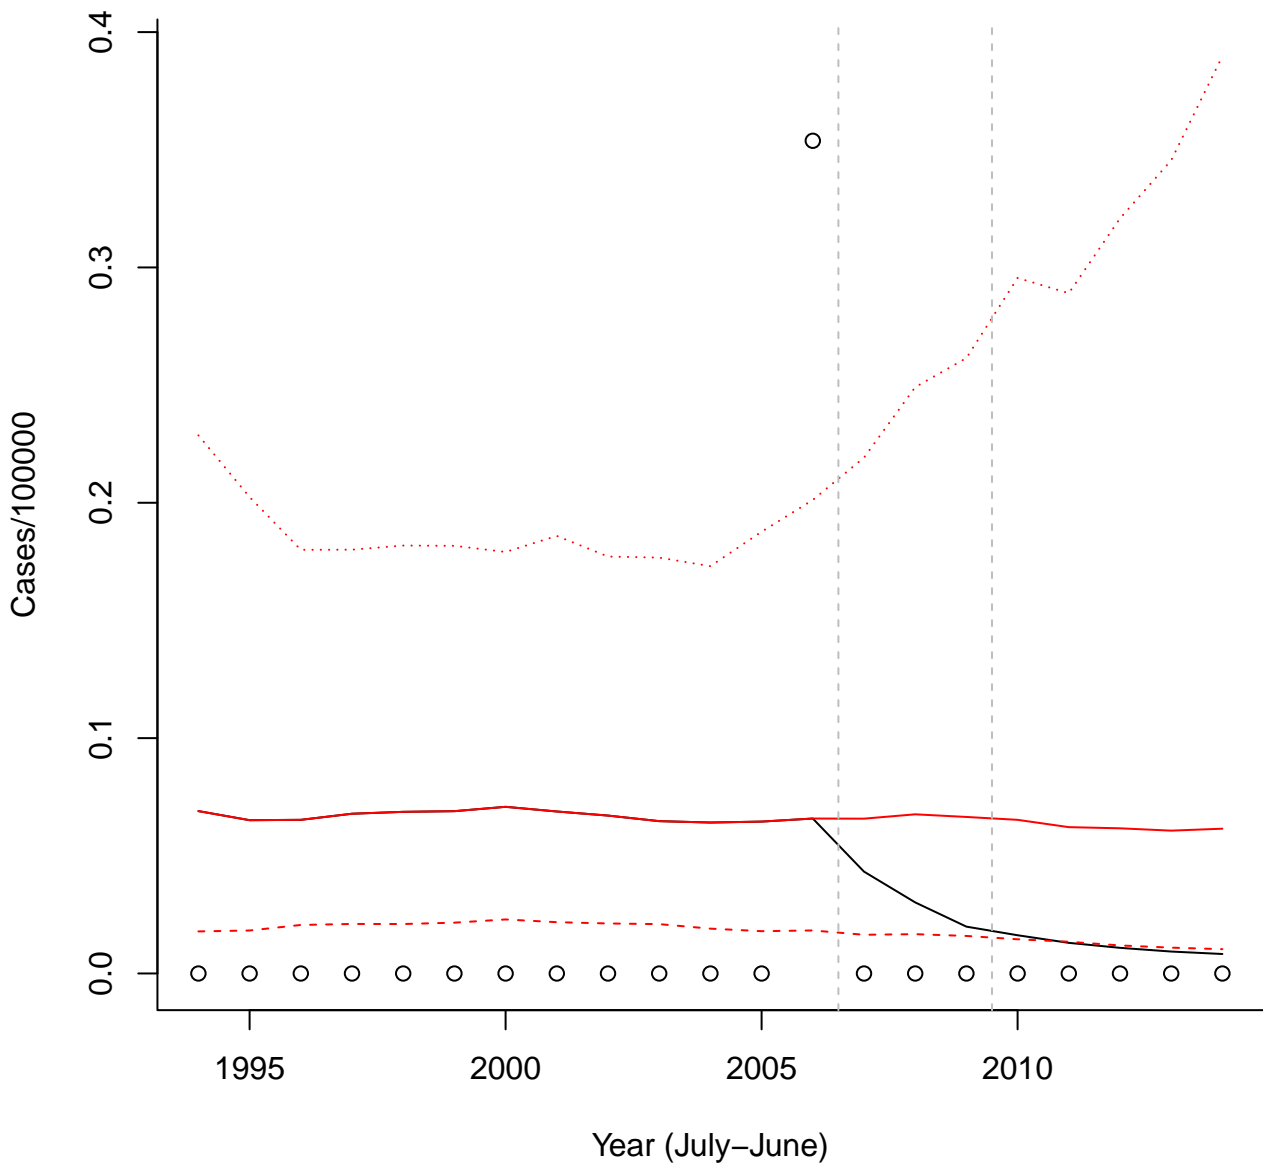

# 40–64y With comorbidity Serotype 7F

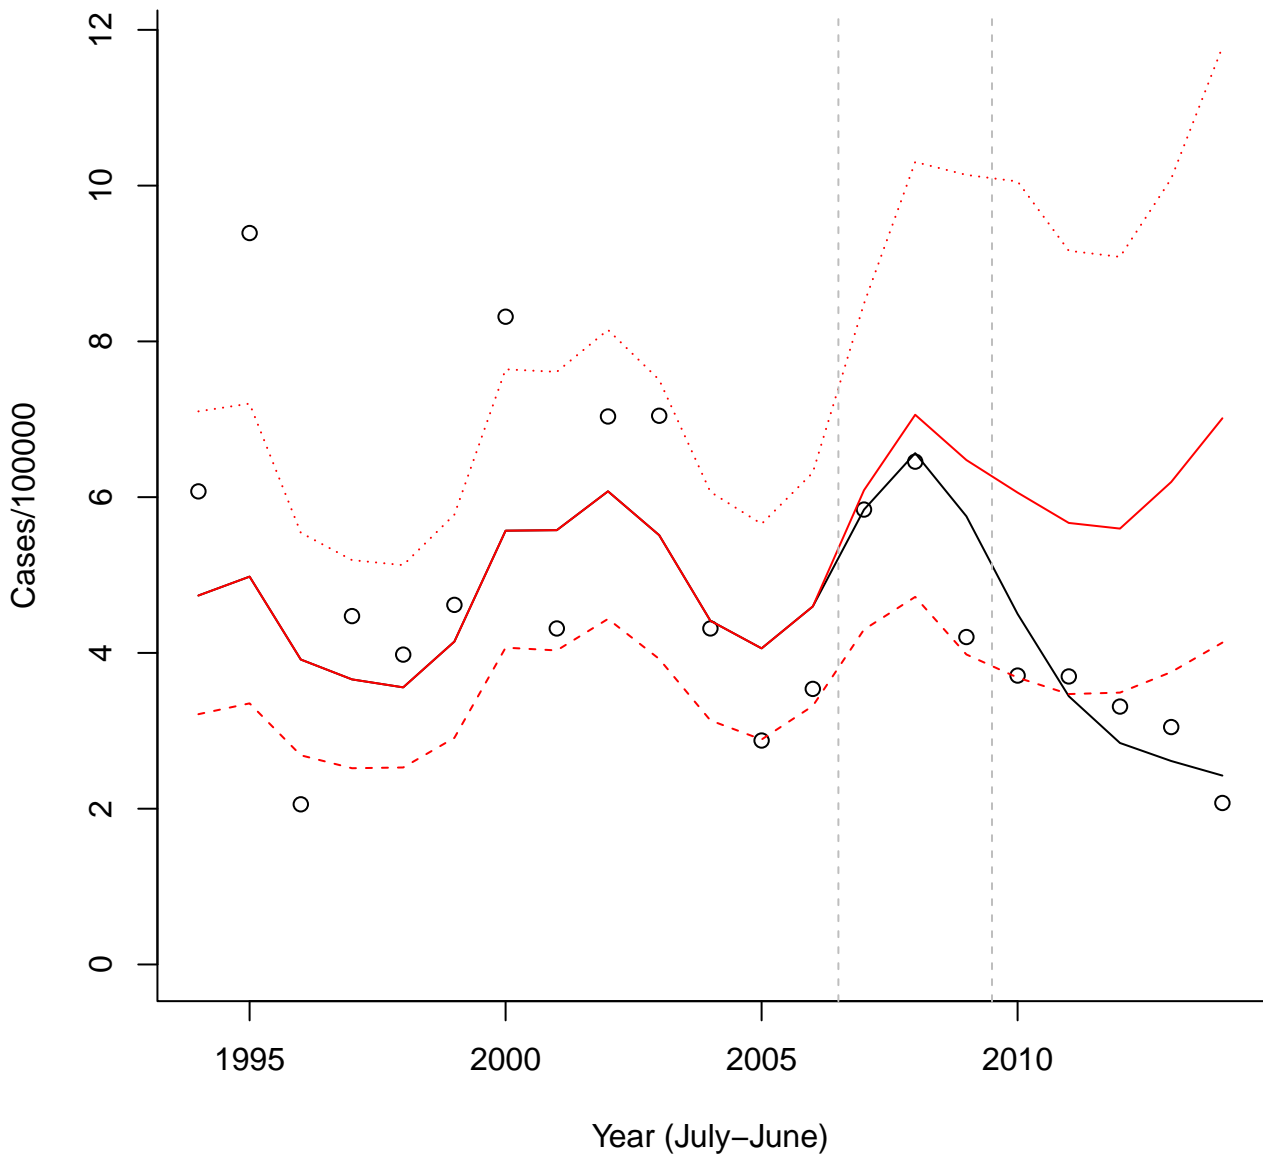

# 40–64y With comorbidity Serotype 8

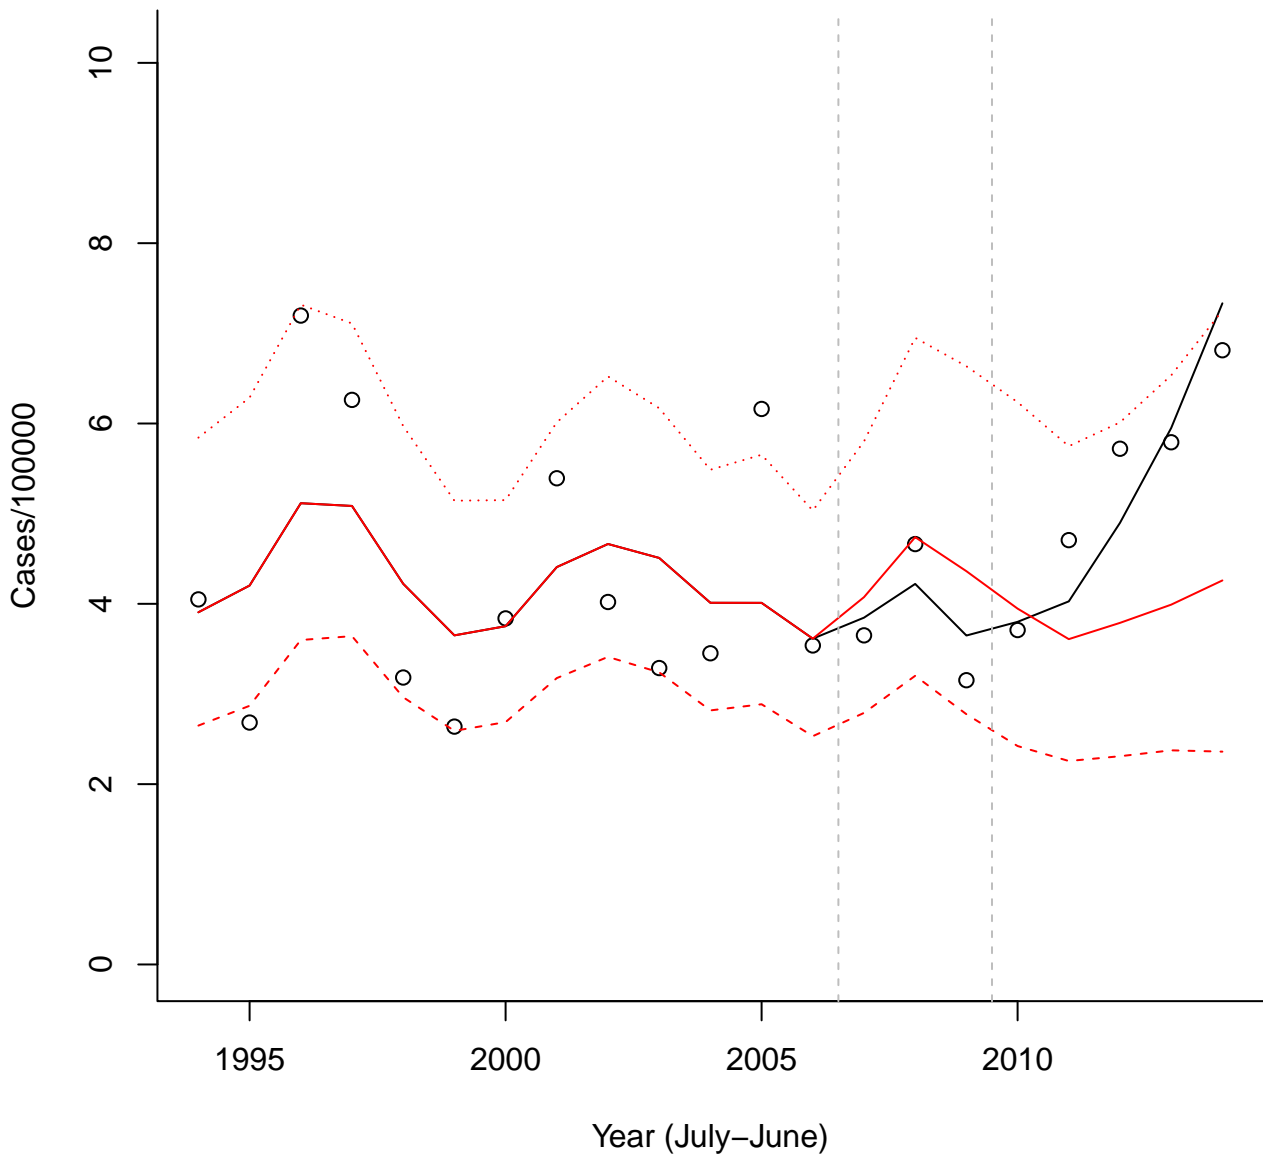

# 40–64y With comorbidity Serotype 9A

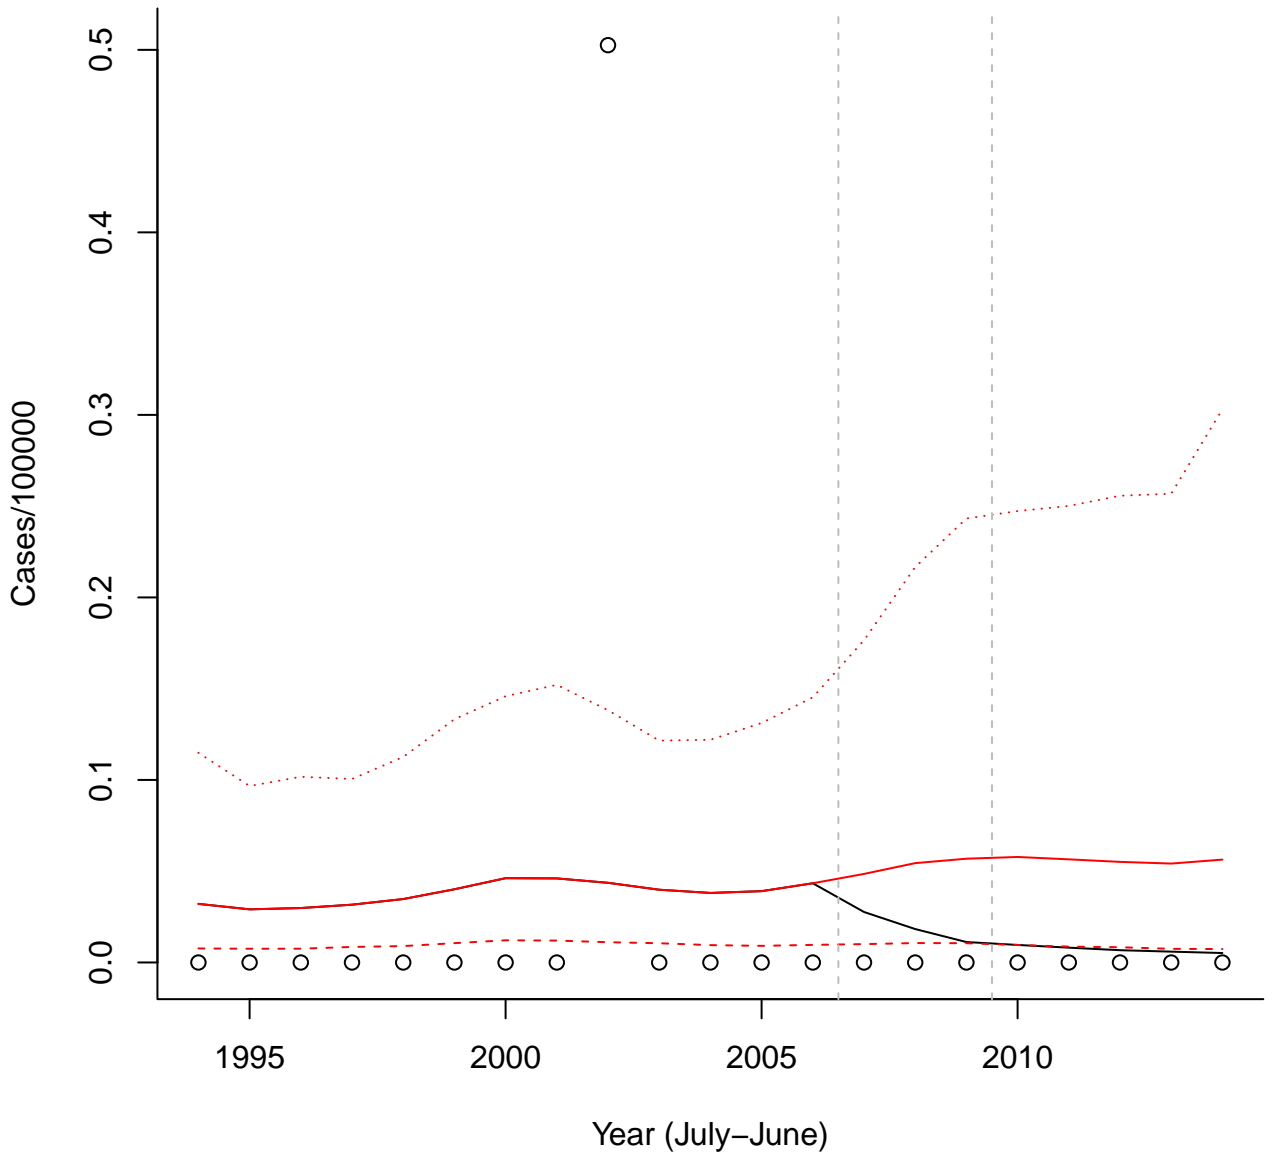

# 40–64y With comorbidity Serotype 9N

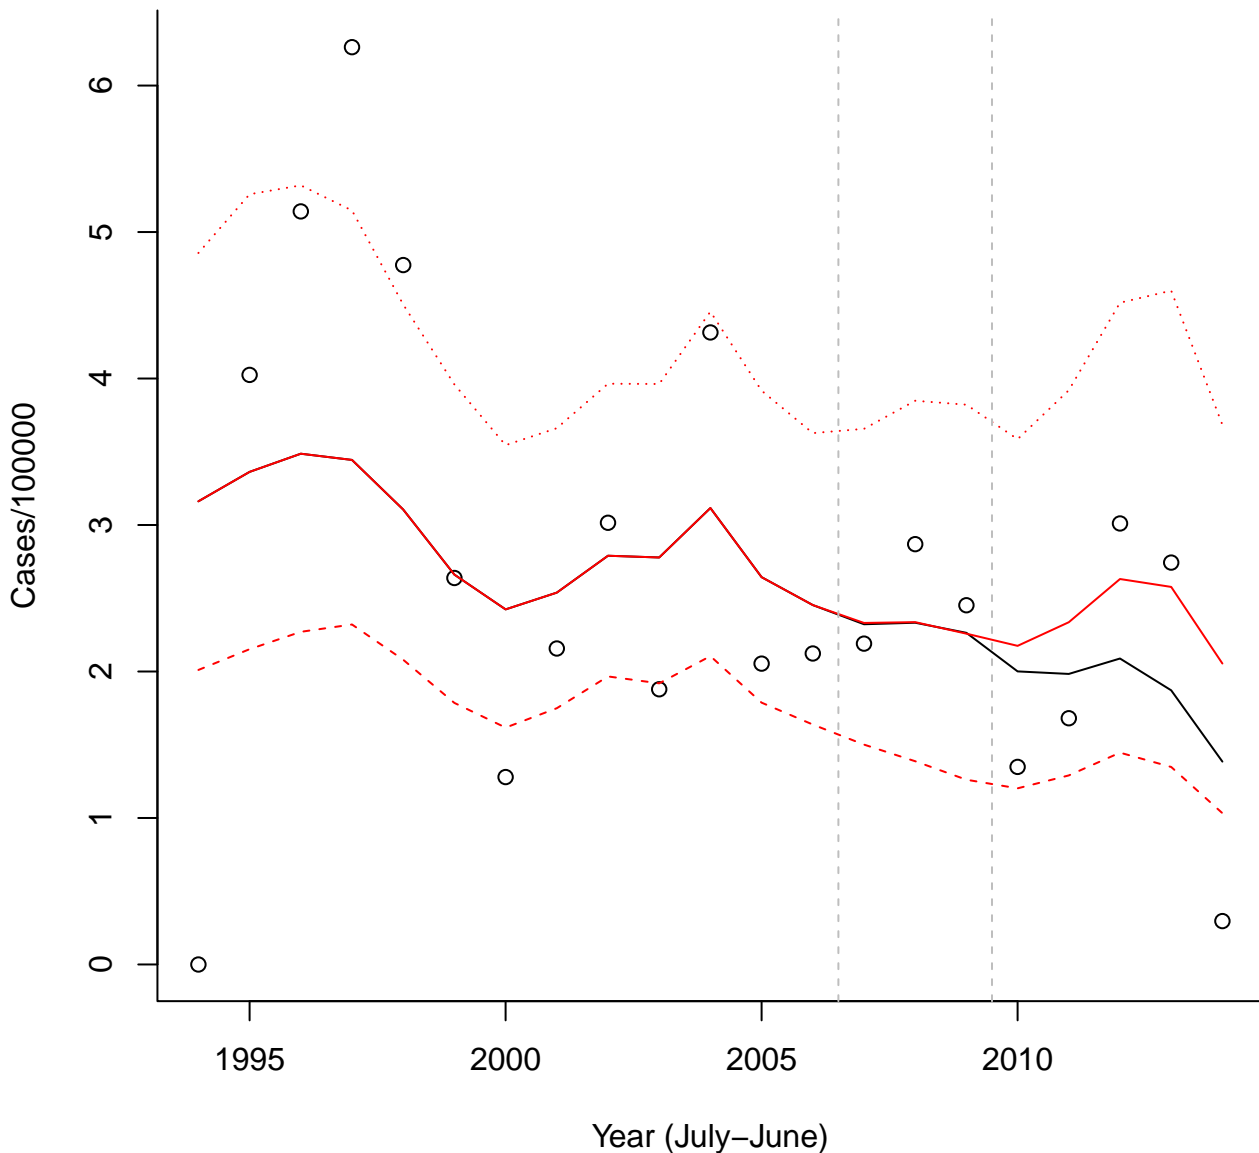

# 40–64y With comorbidity Serotype 9V

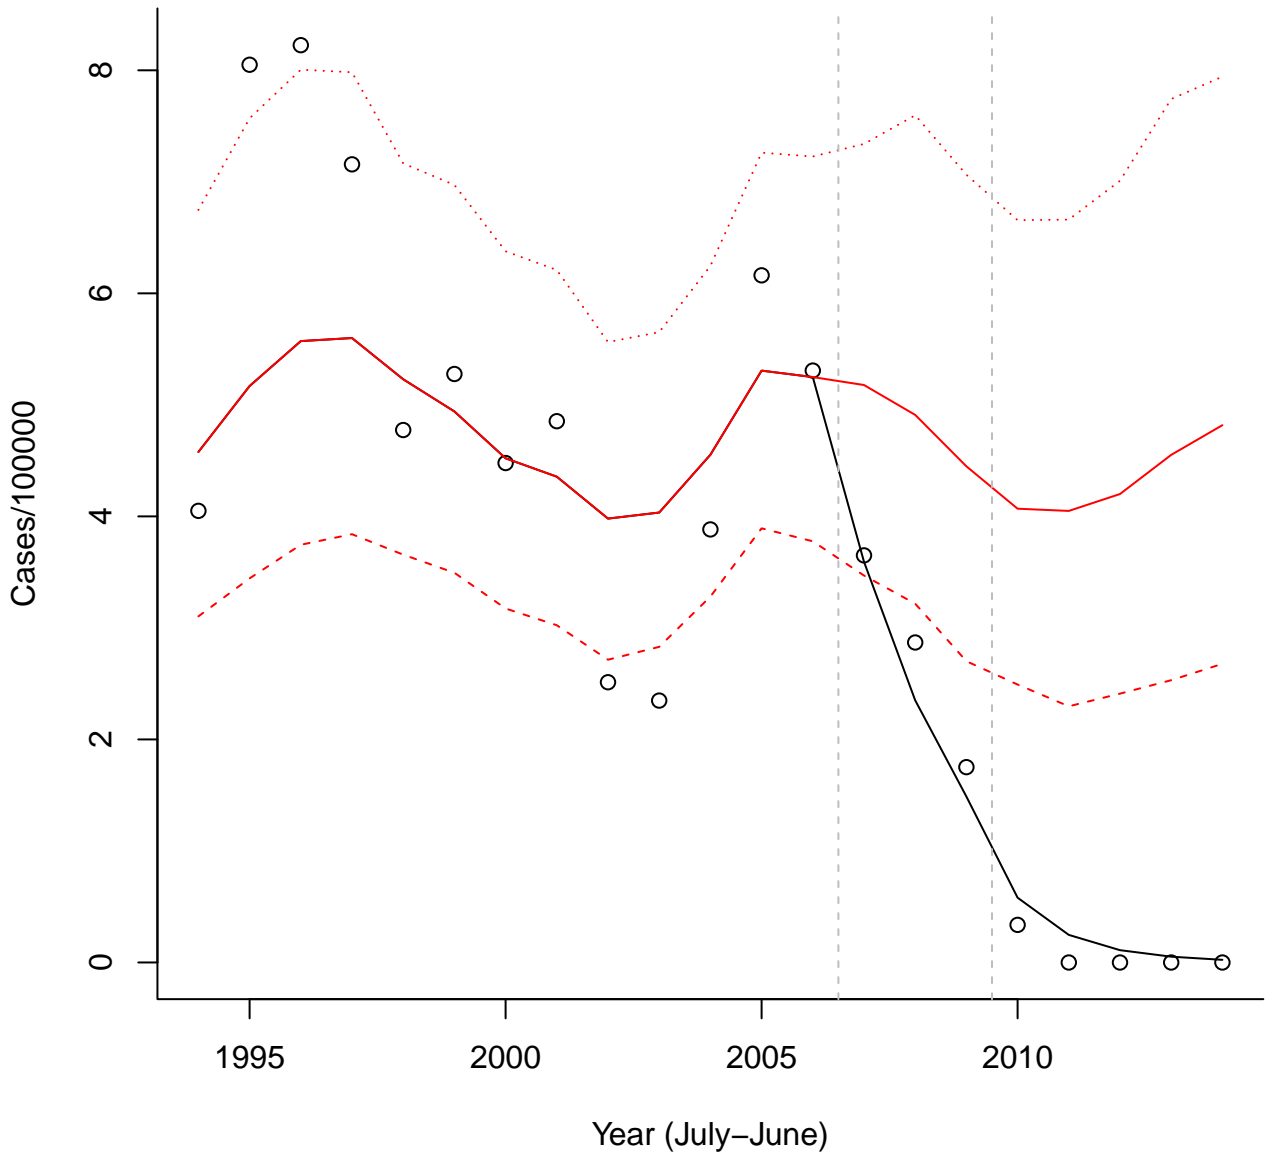

# 40-64y With comorbidity Serotype OT1

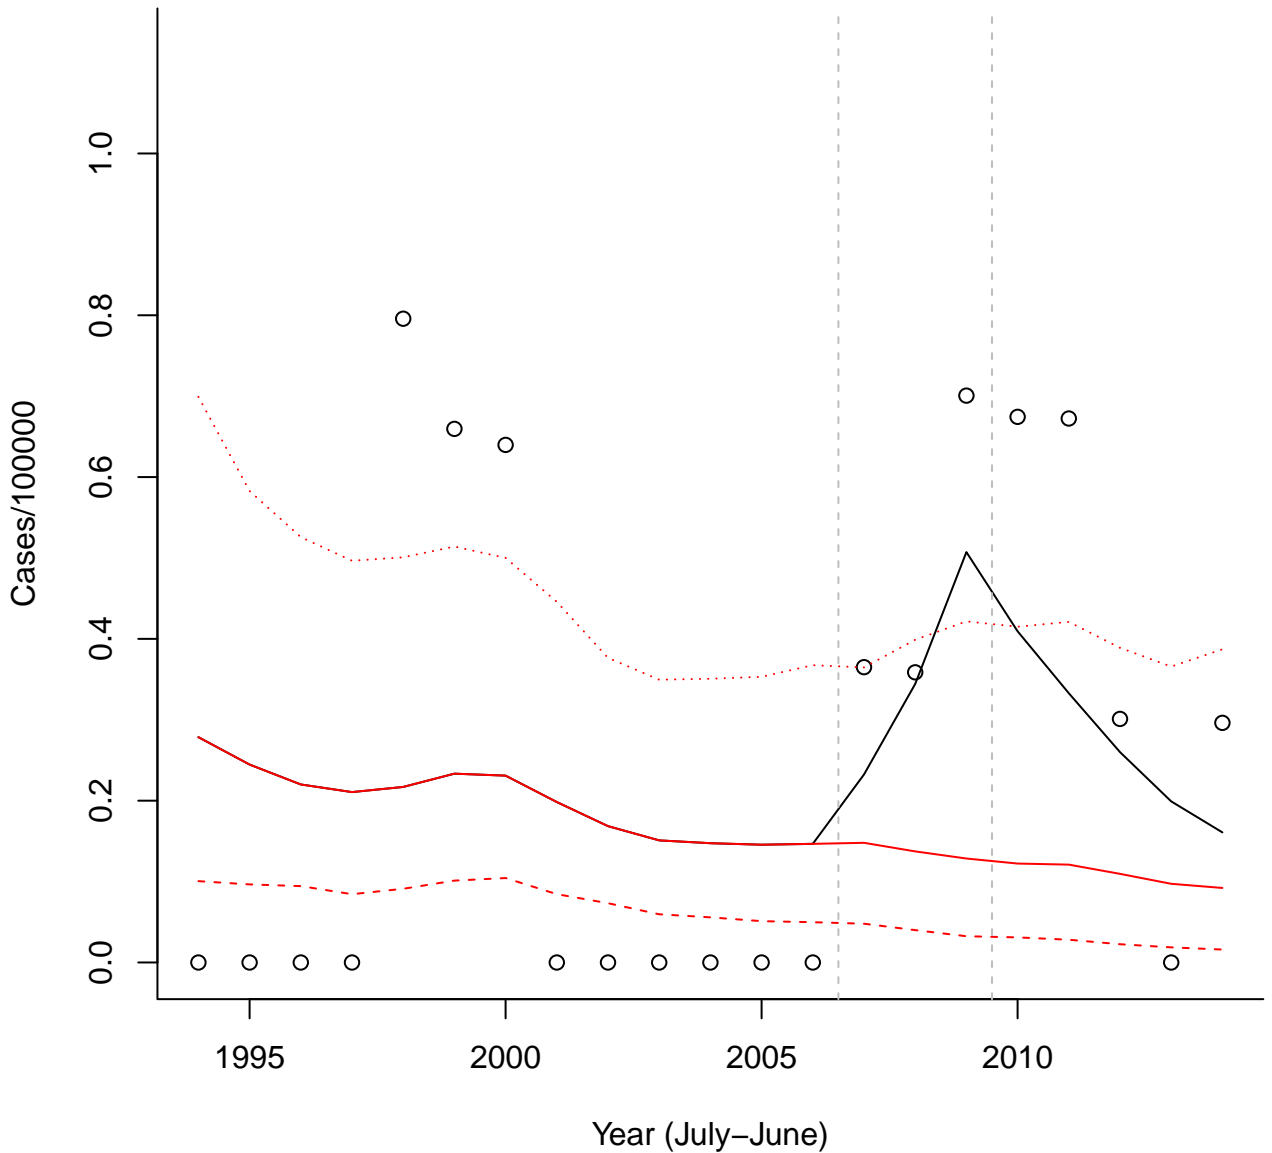



# 65+y With comorbidity Serotype 1

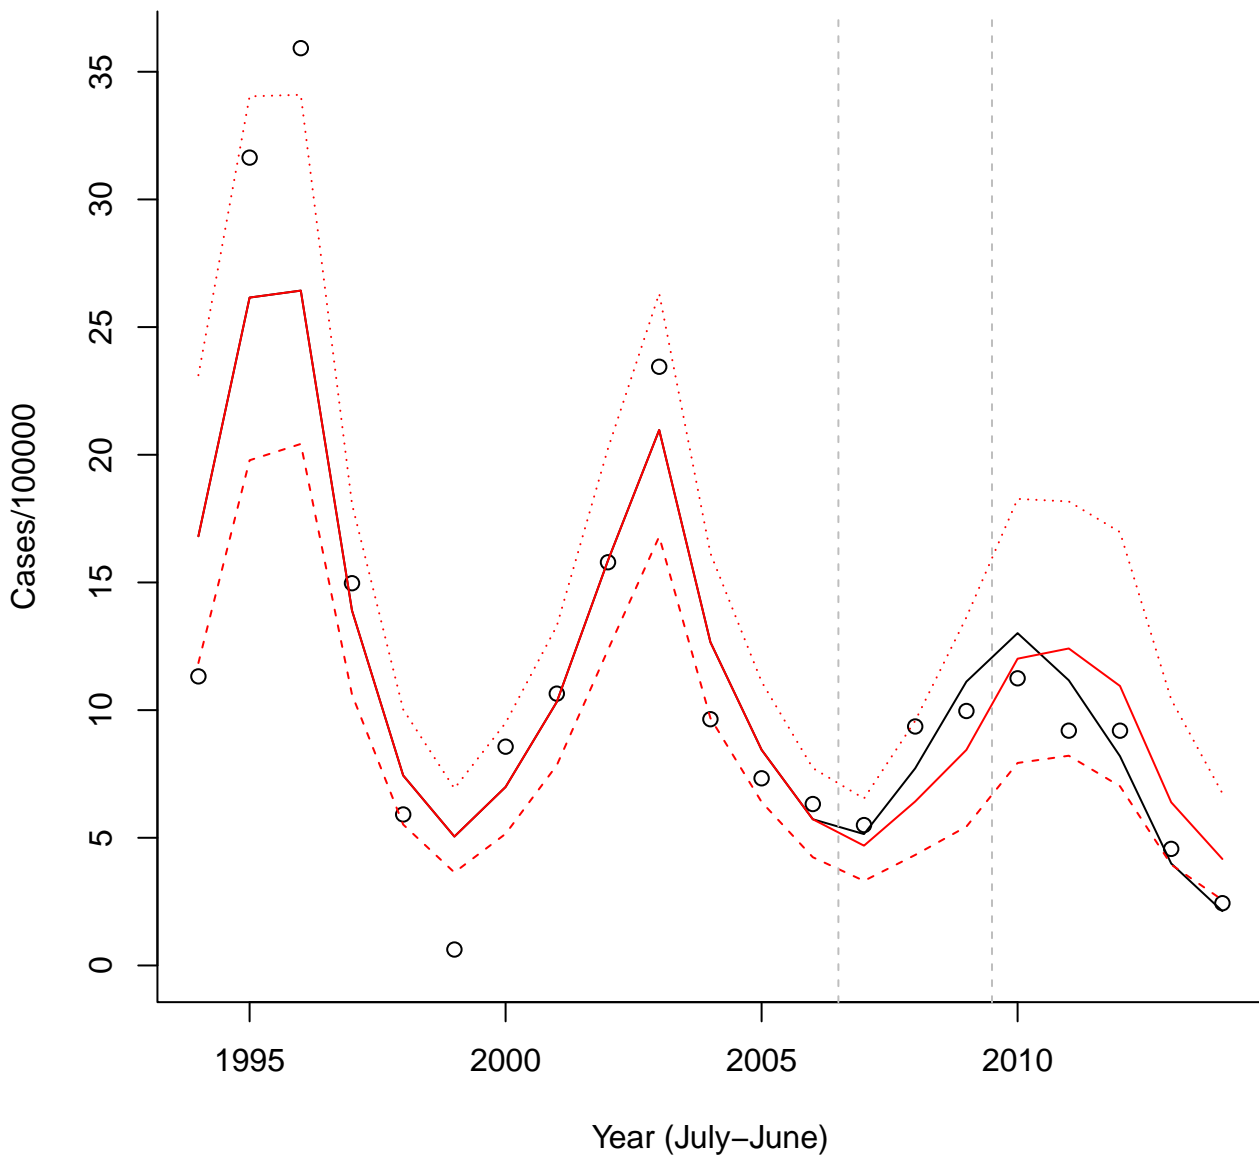

# 65+y With comorbidity Serotype 10A

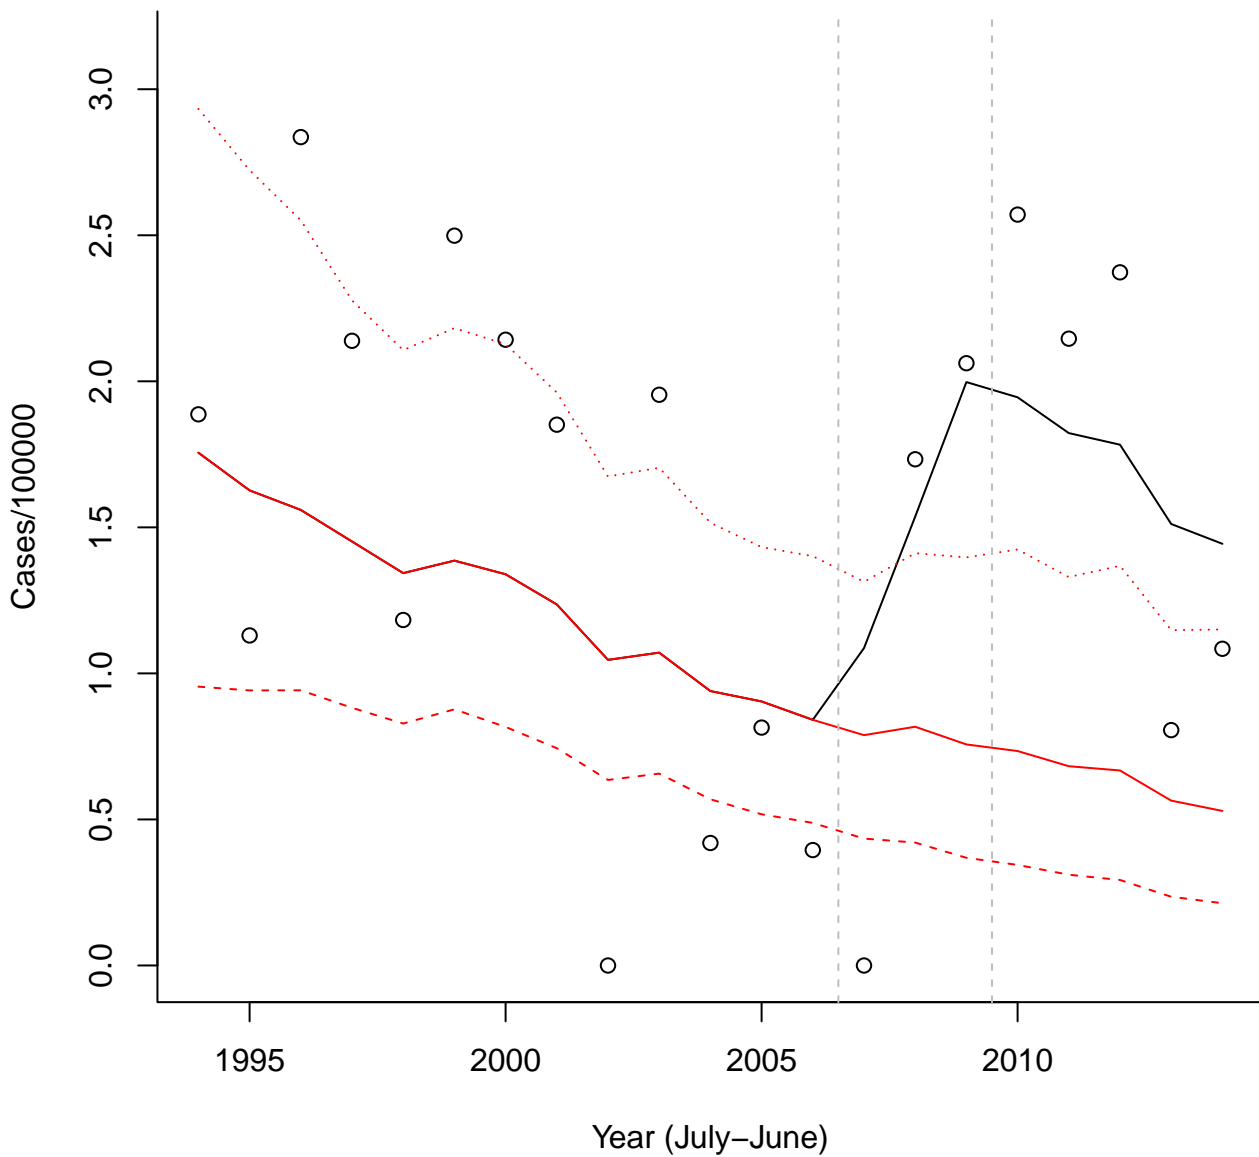

# 65+y With comorbidity Serotype 10B

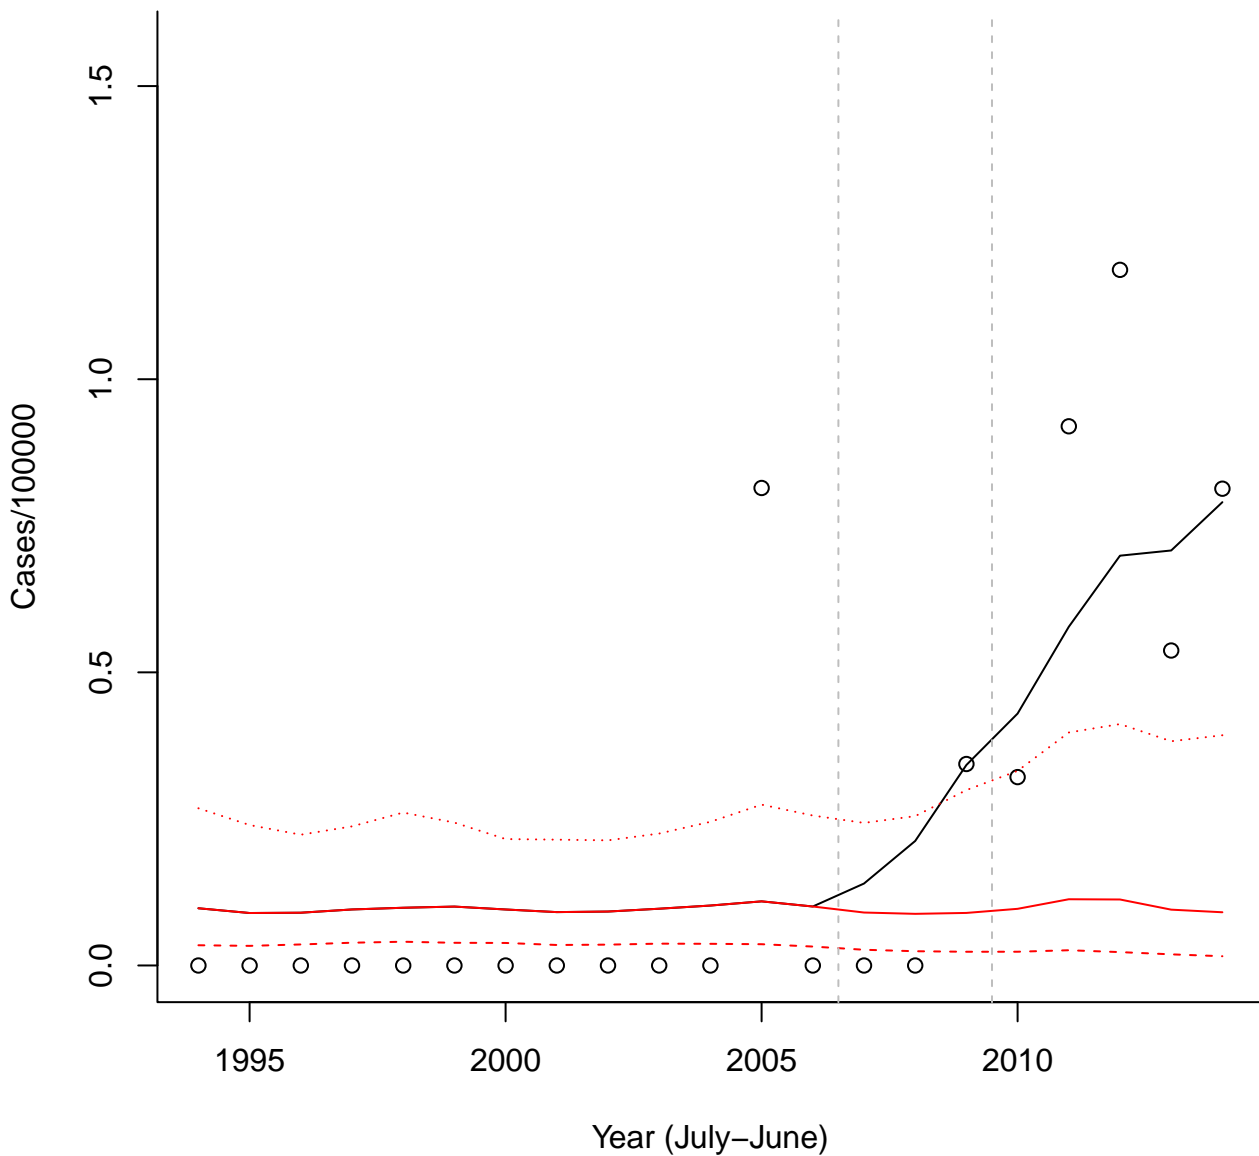

# 65+y With comorbidity Serotype 10F

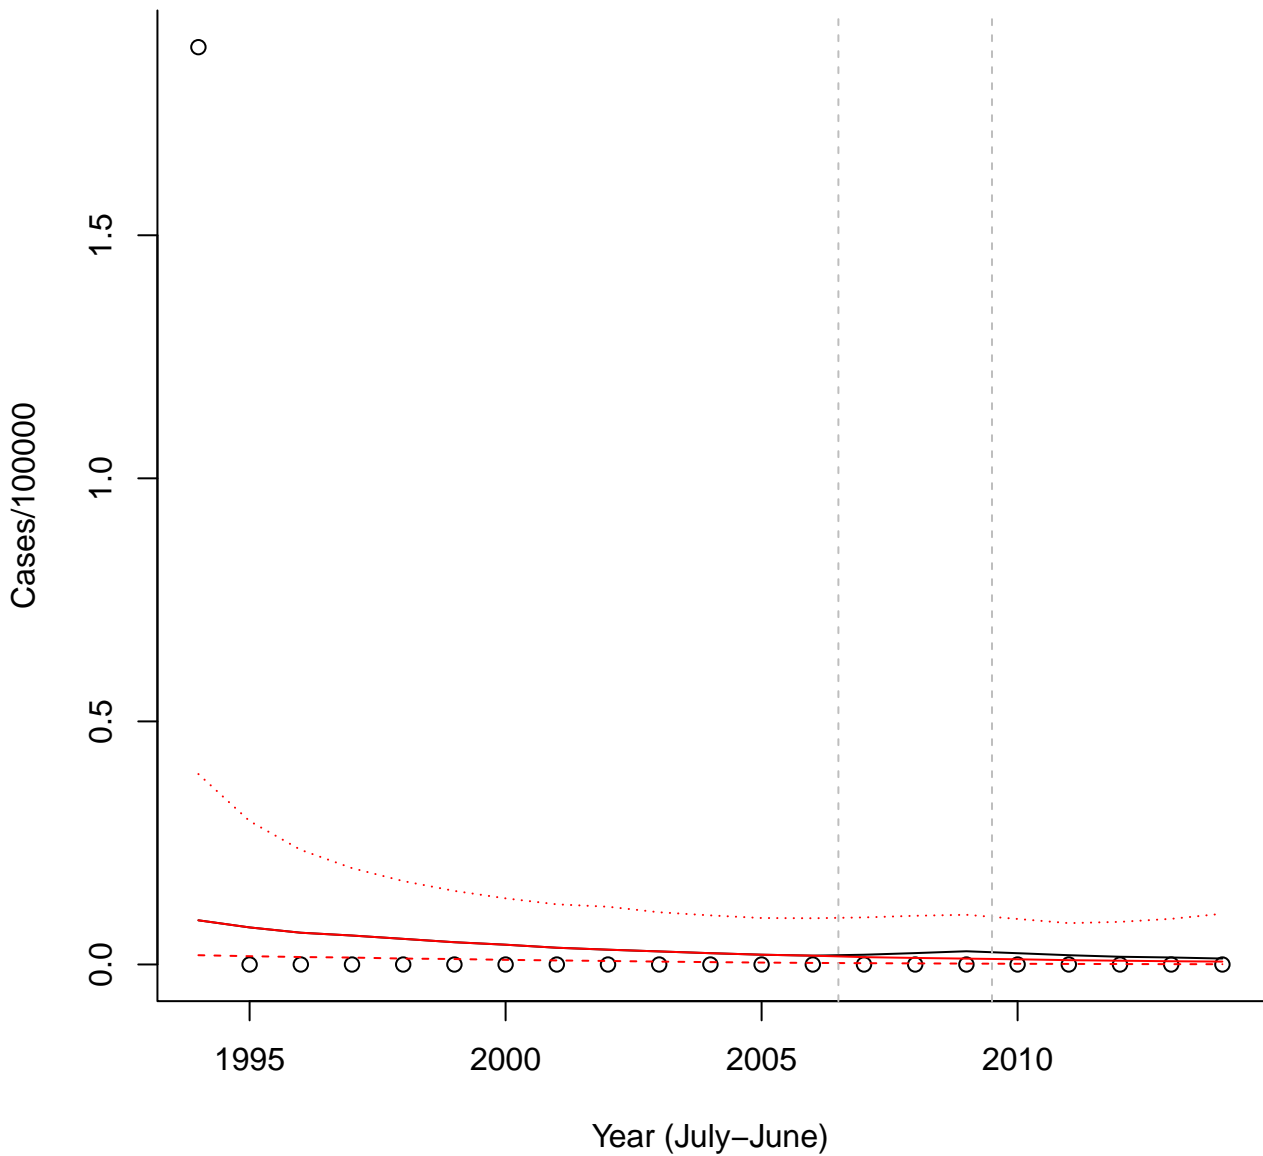

# 65+y With comorbidity Serotype 11A

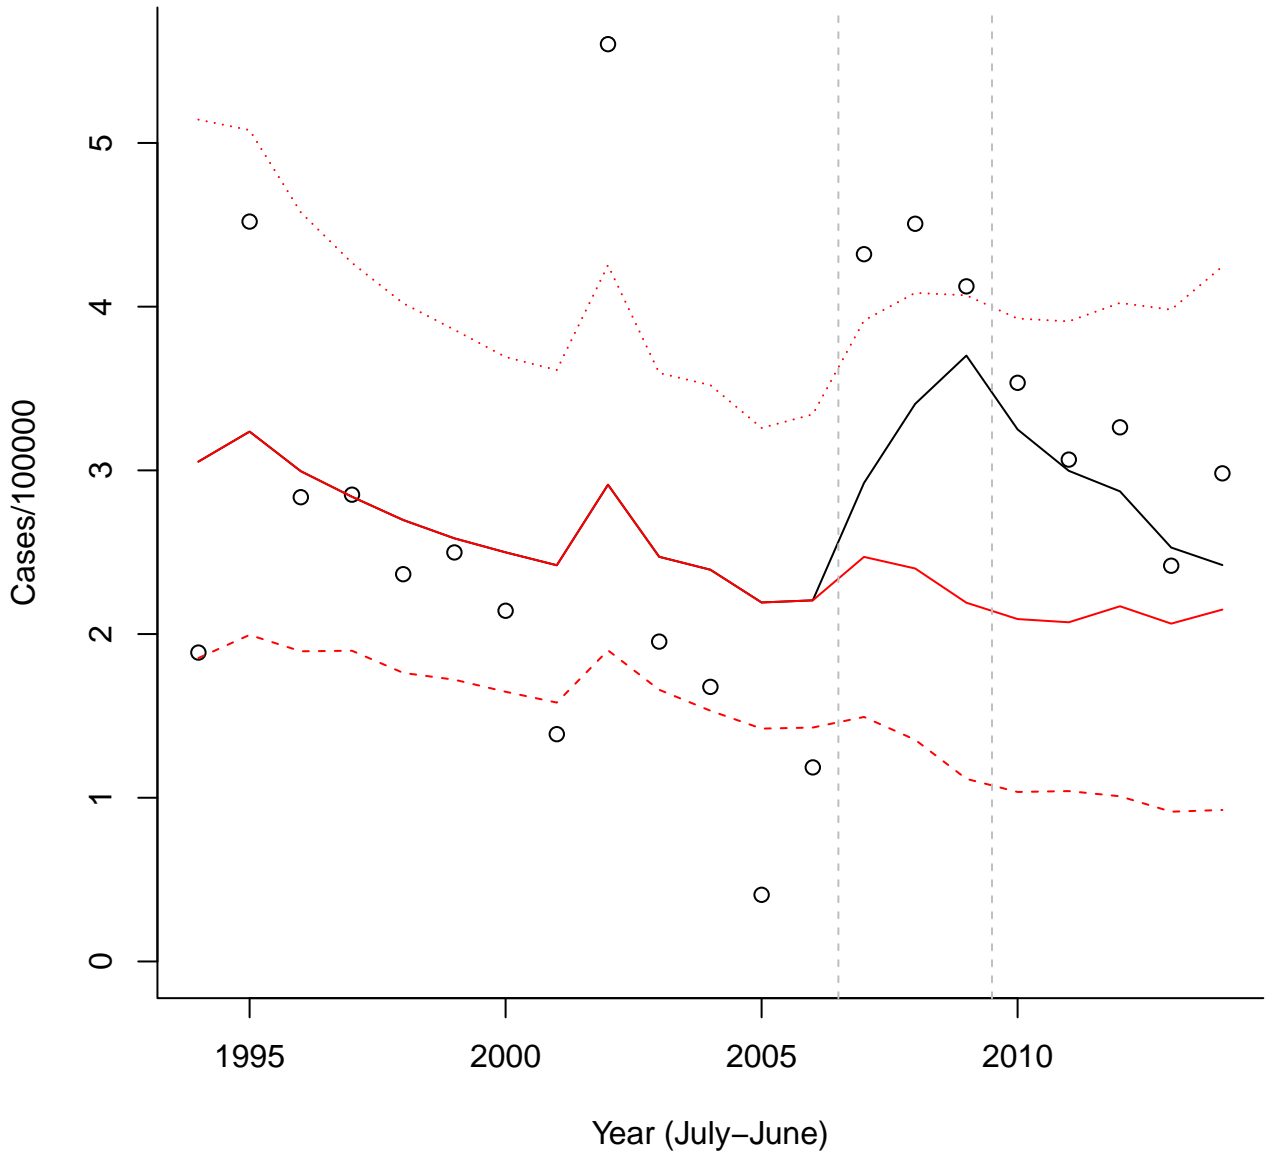

# 65+y With comorbidity Serotype 11B

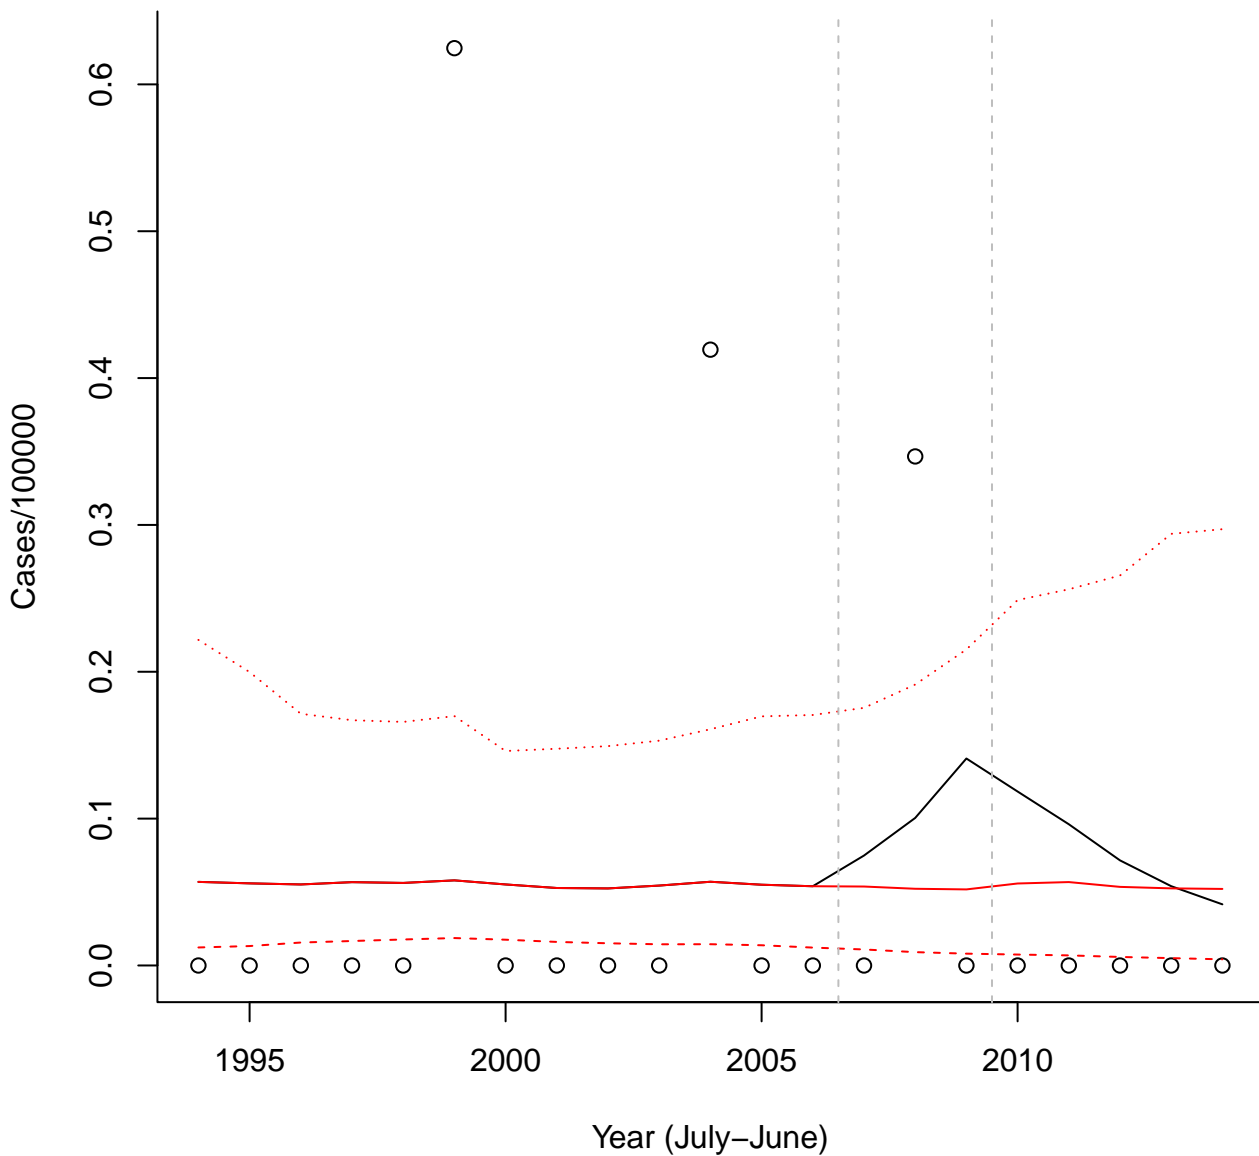

# 65+y With comorbidity Serotype 12A

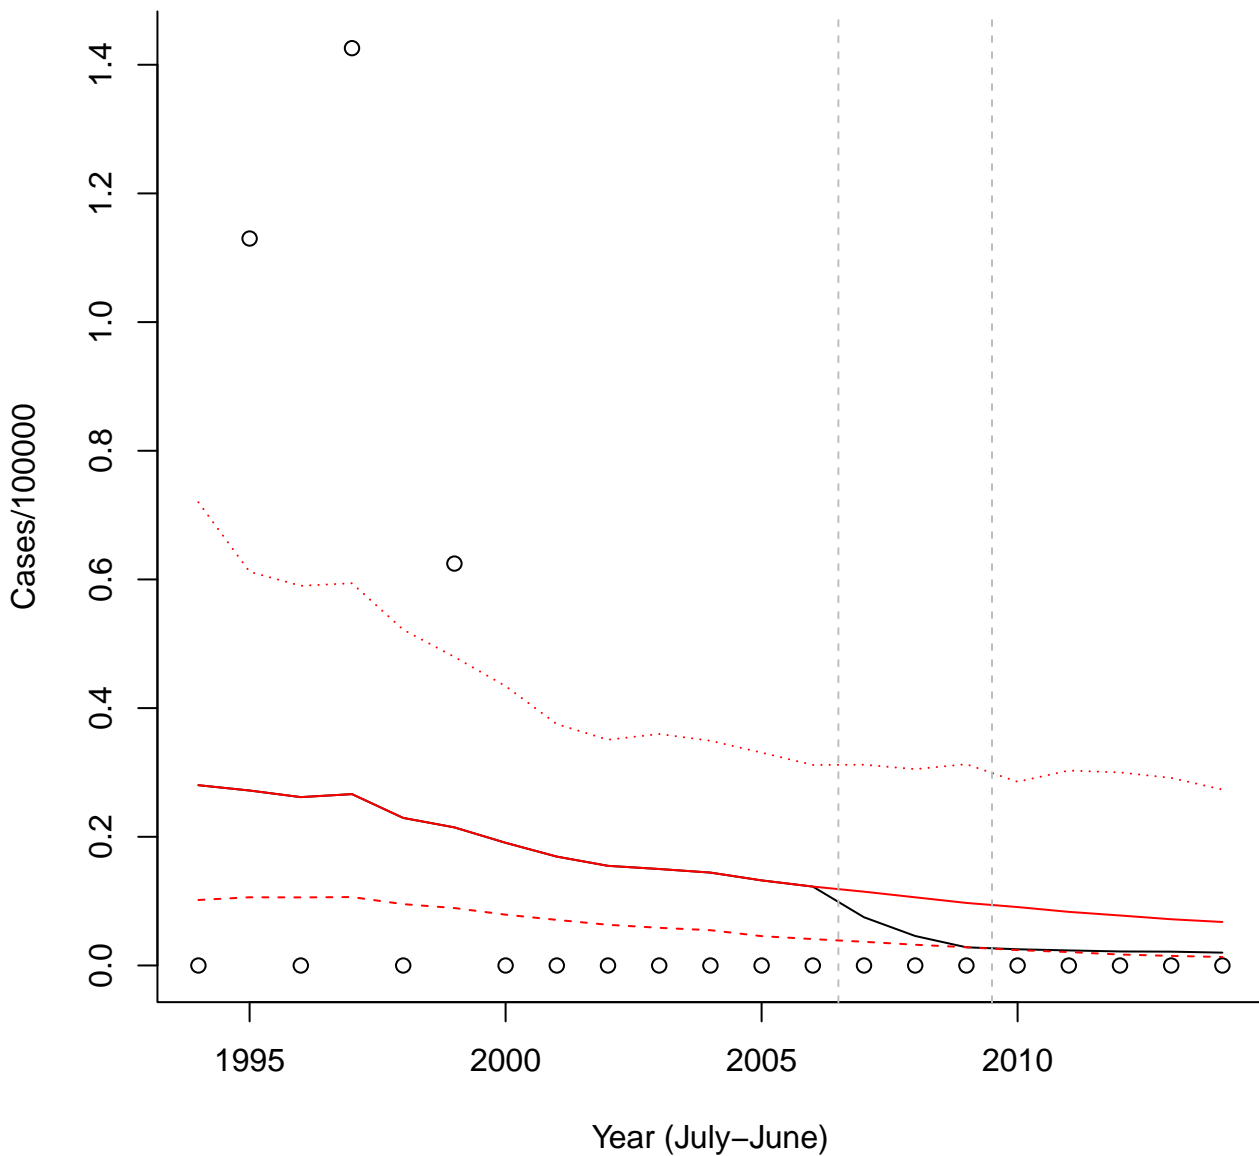

# 65+y With comorbidity Serotype 12F

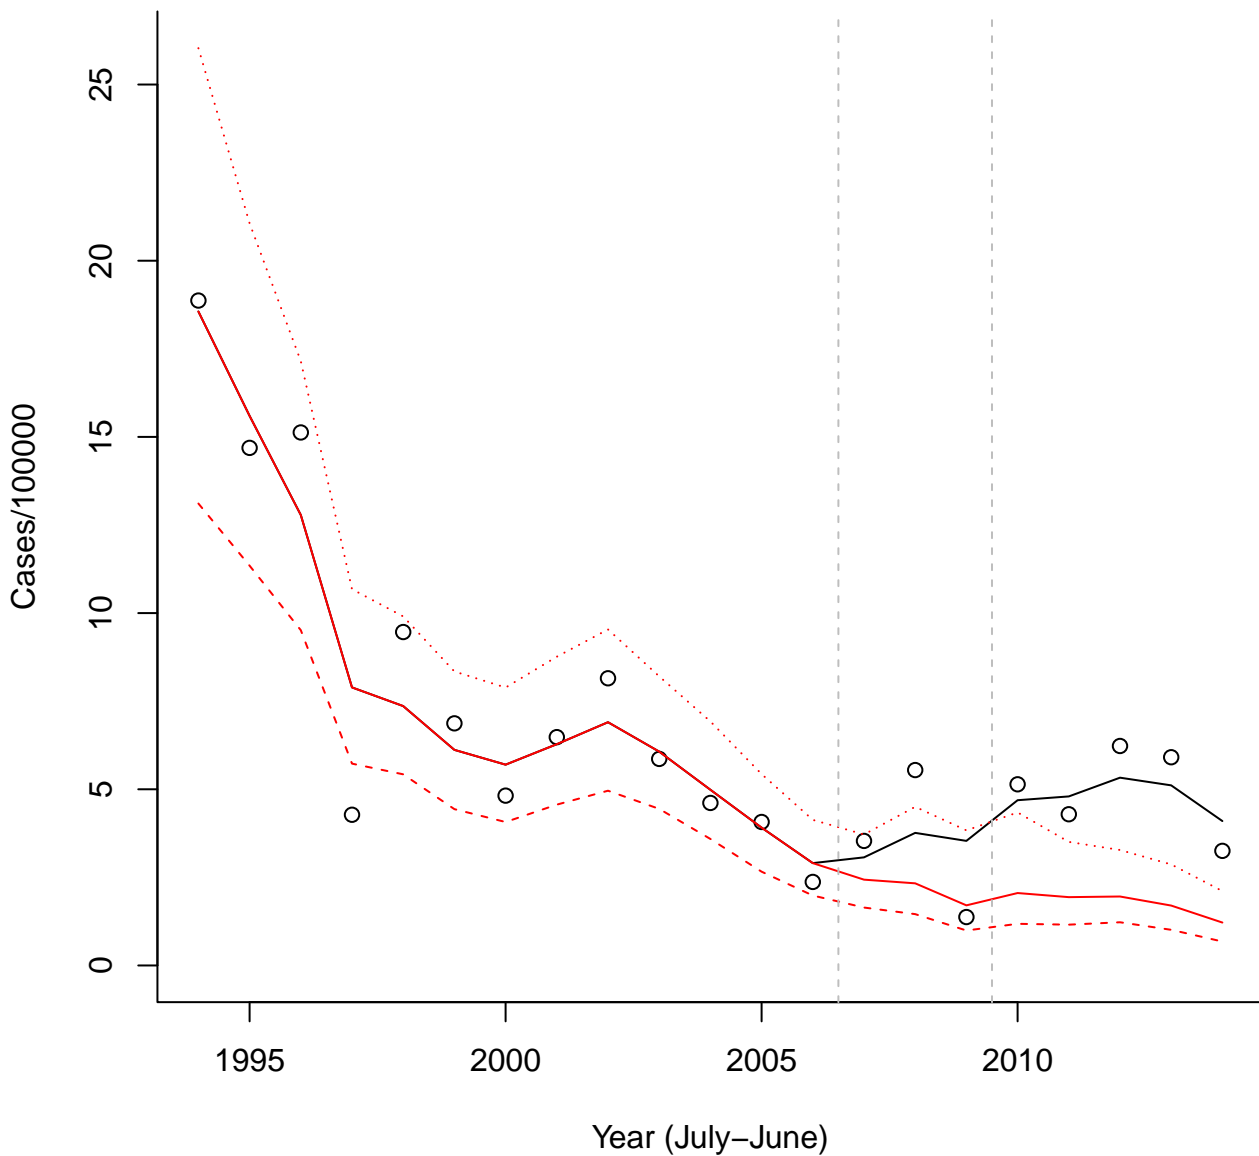



# 65+y With comorbidity Serotype 13

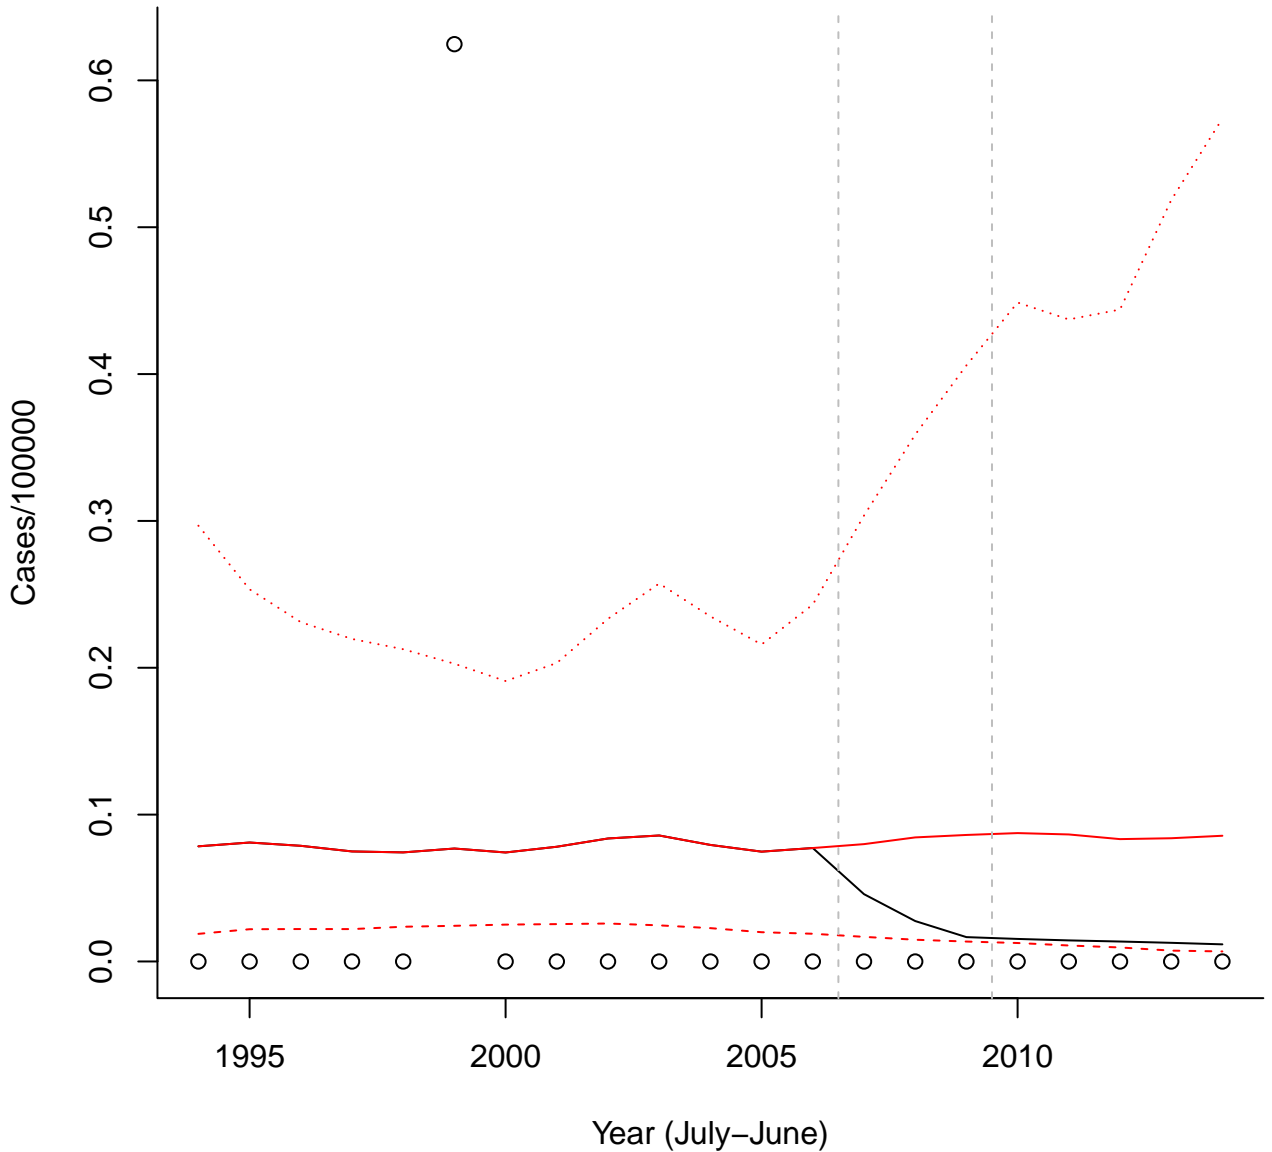

# 65+y With comorbidity Serotype 14

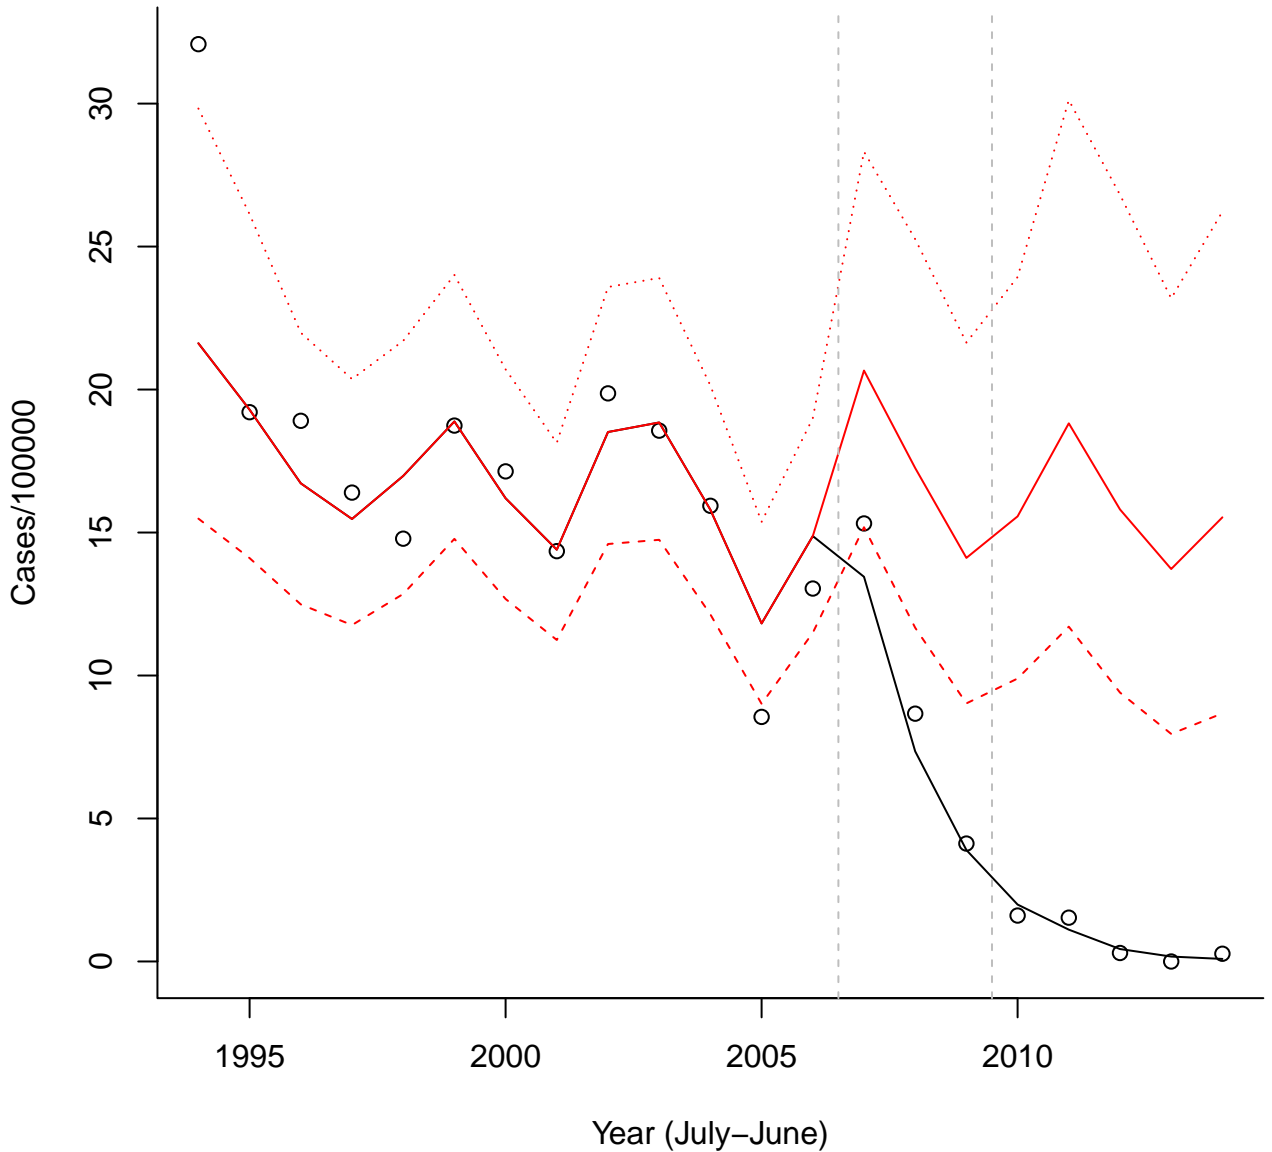

# 65+y With comorbidity Serotype 15A

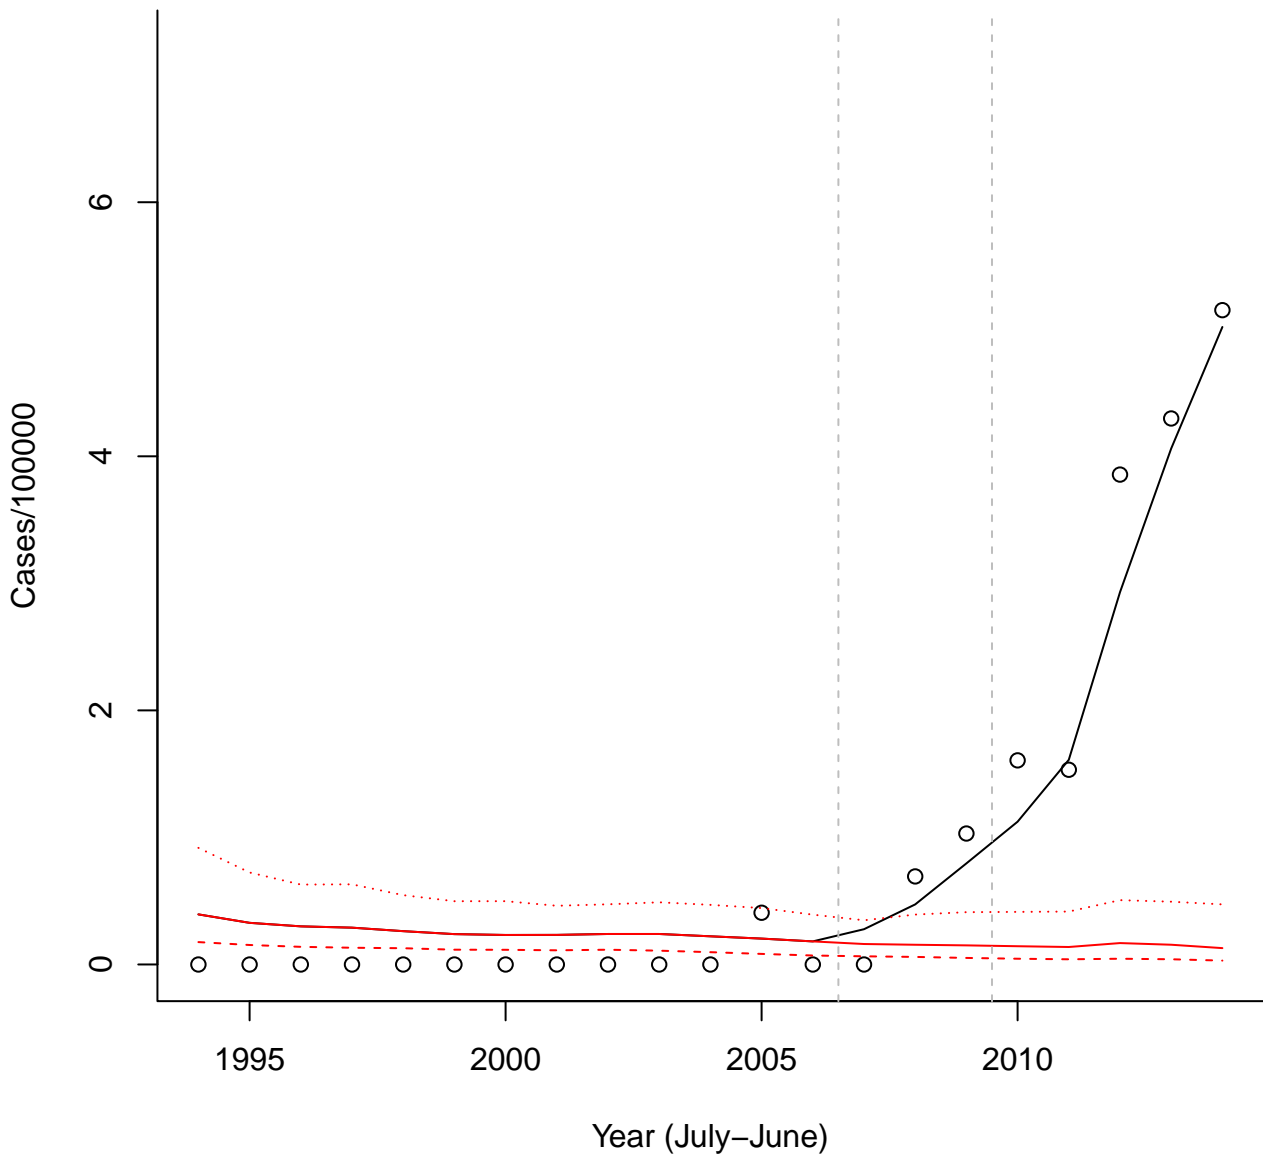

# 65+y With comorbidity Serotype 15BC

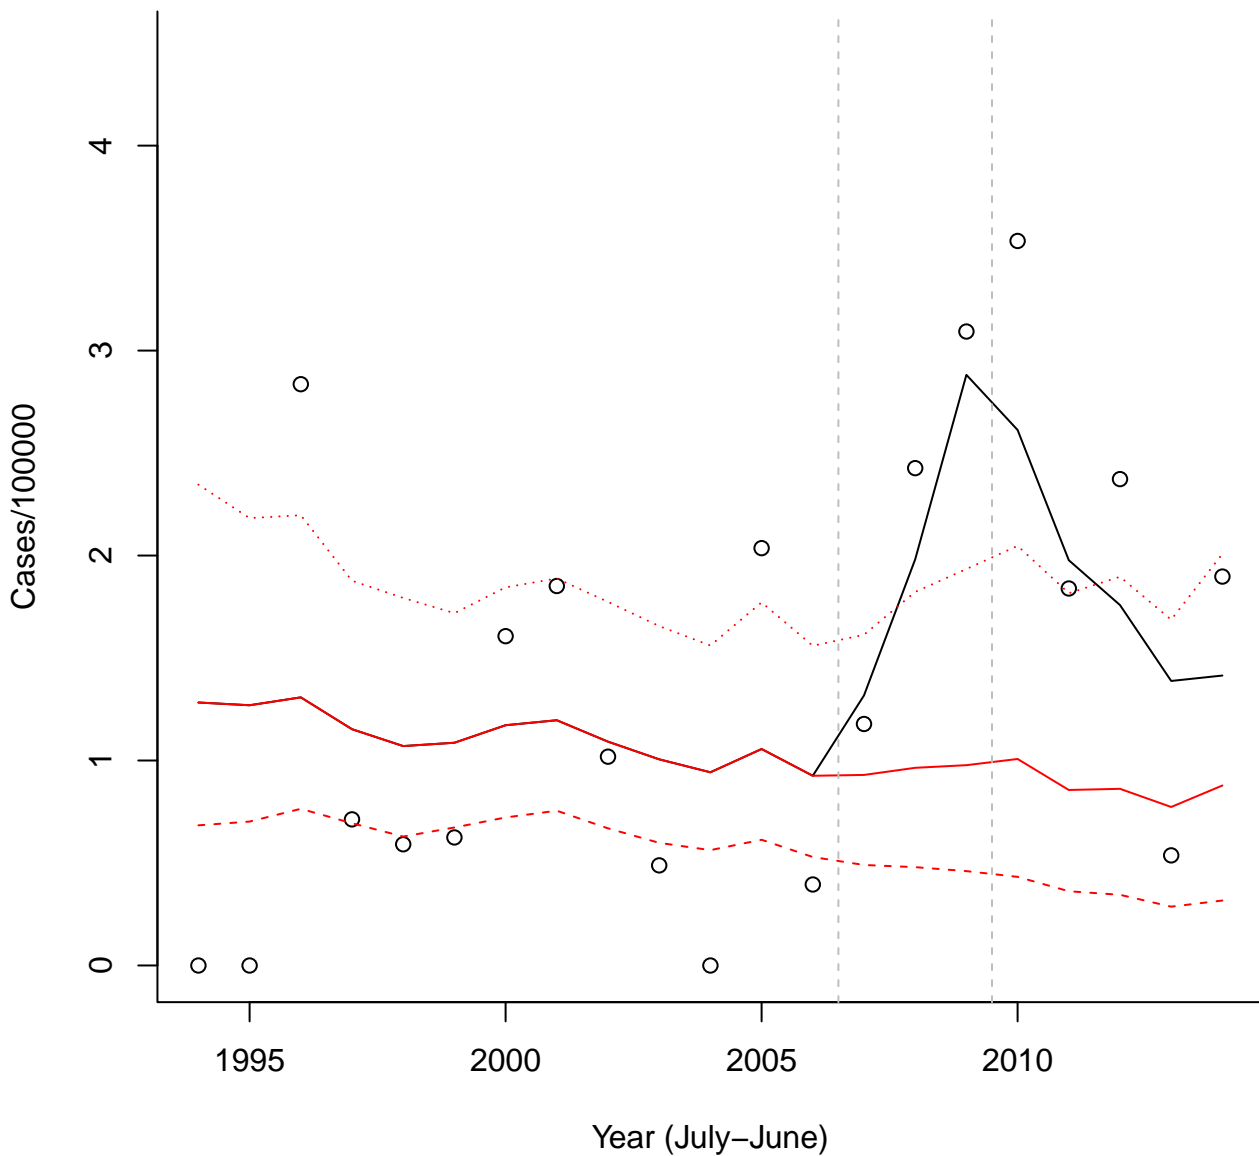

# 65+y With comorbidity Serotype 15F

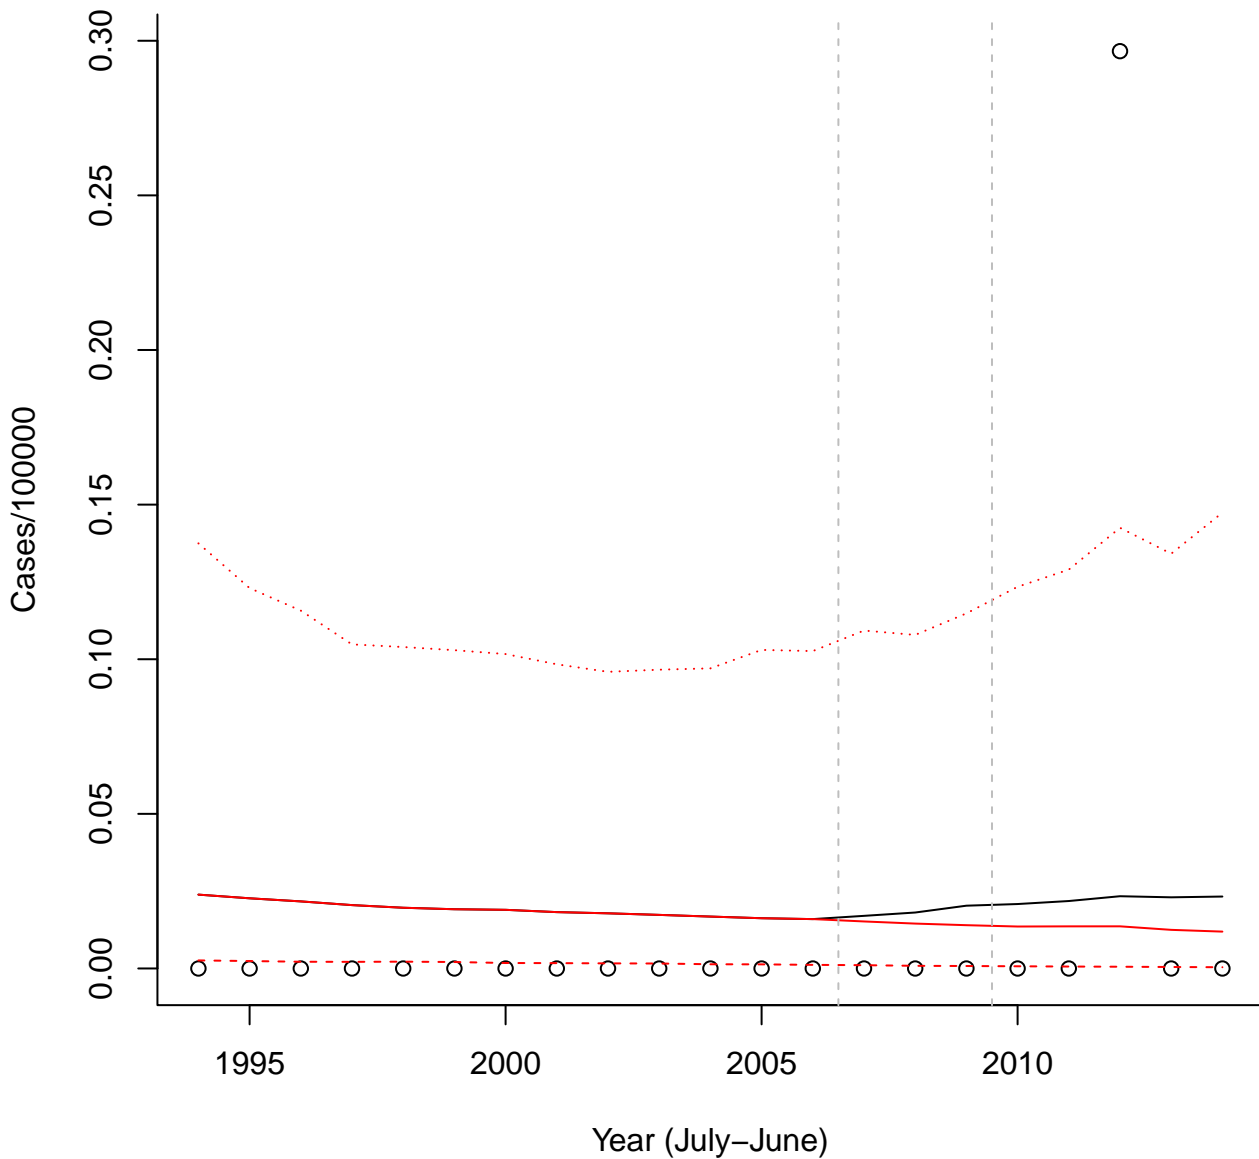

# 65+y With comorbidity Serotype 16F

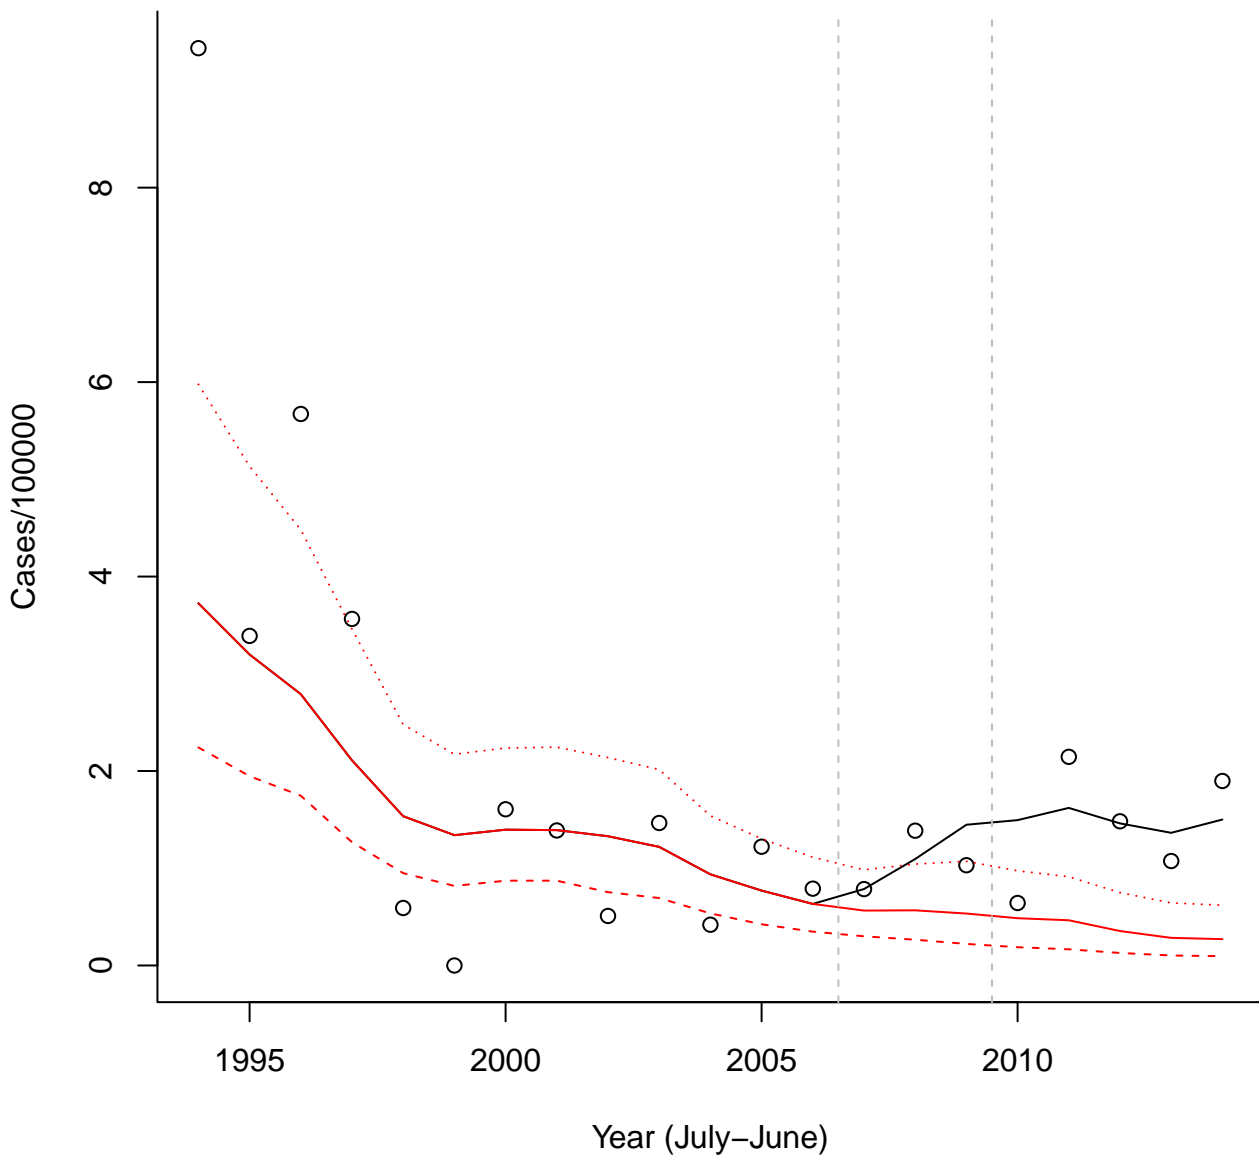

# 65+y With comorbidity Serotype 17A

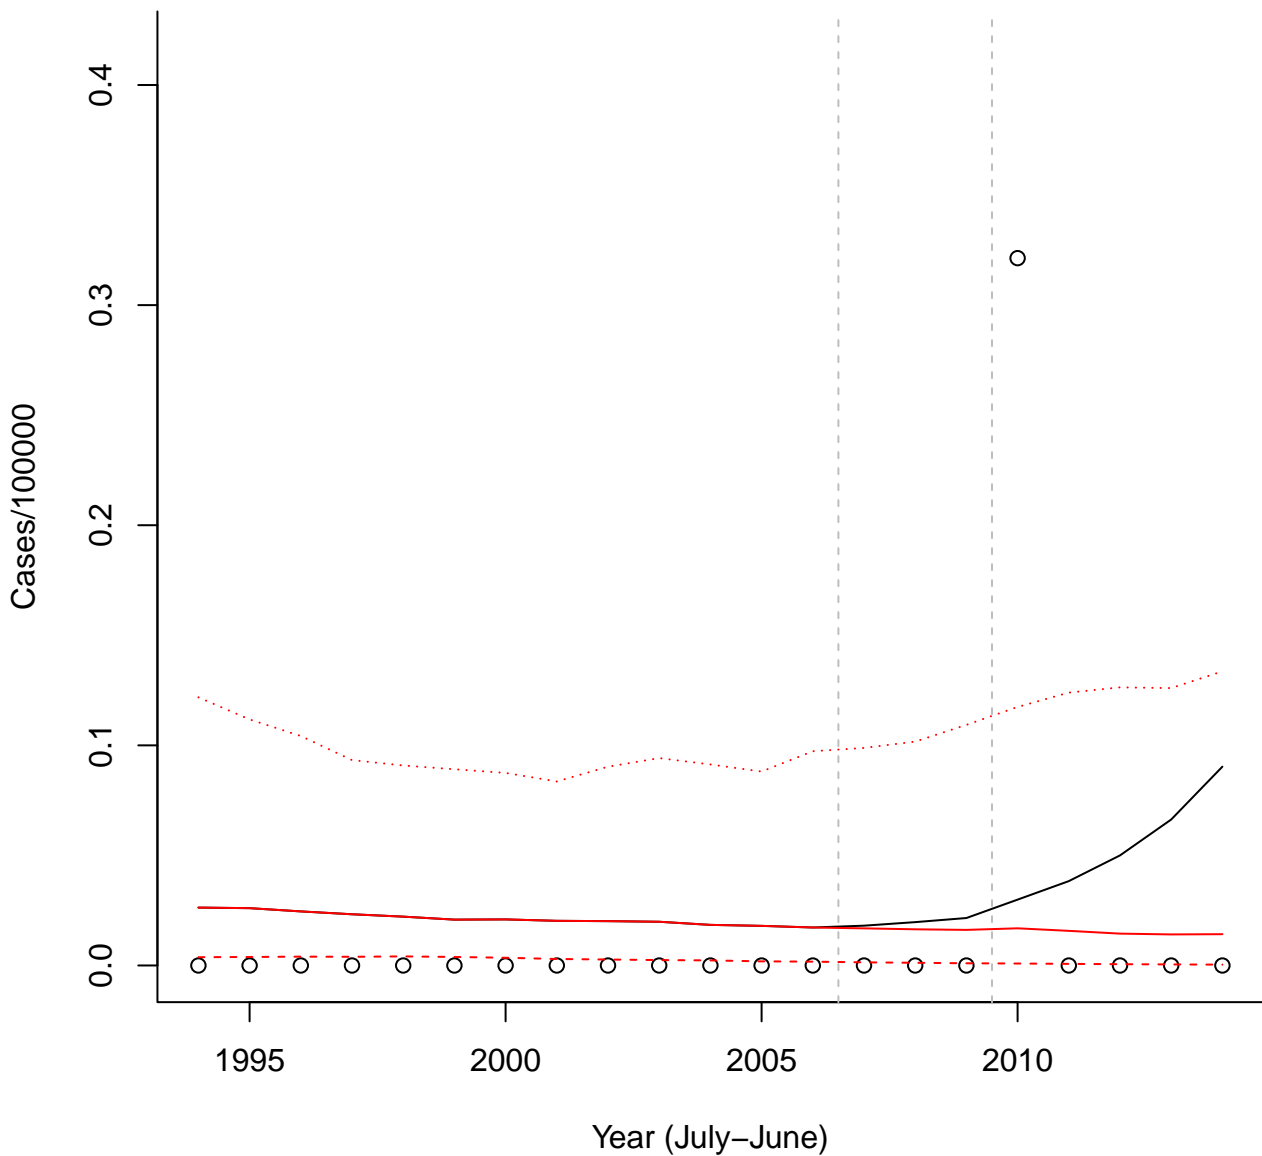

# 65+y With comorbidity Serotype 17F

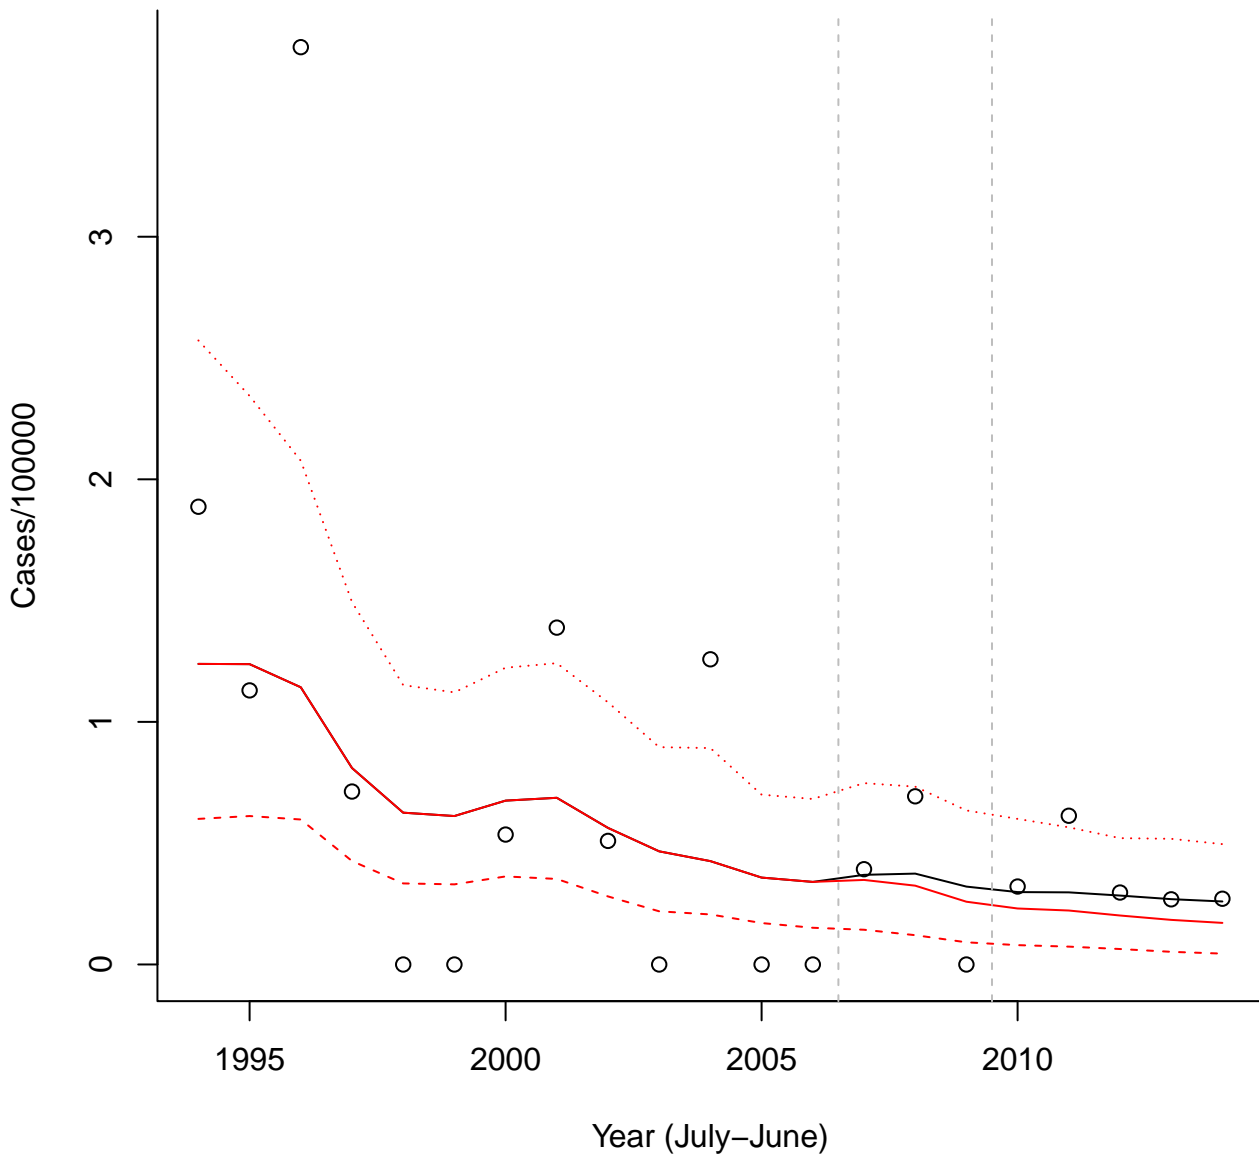



# 65+y With comorbidity Serotype 18A

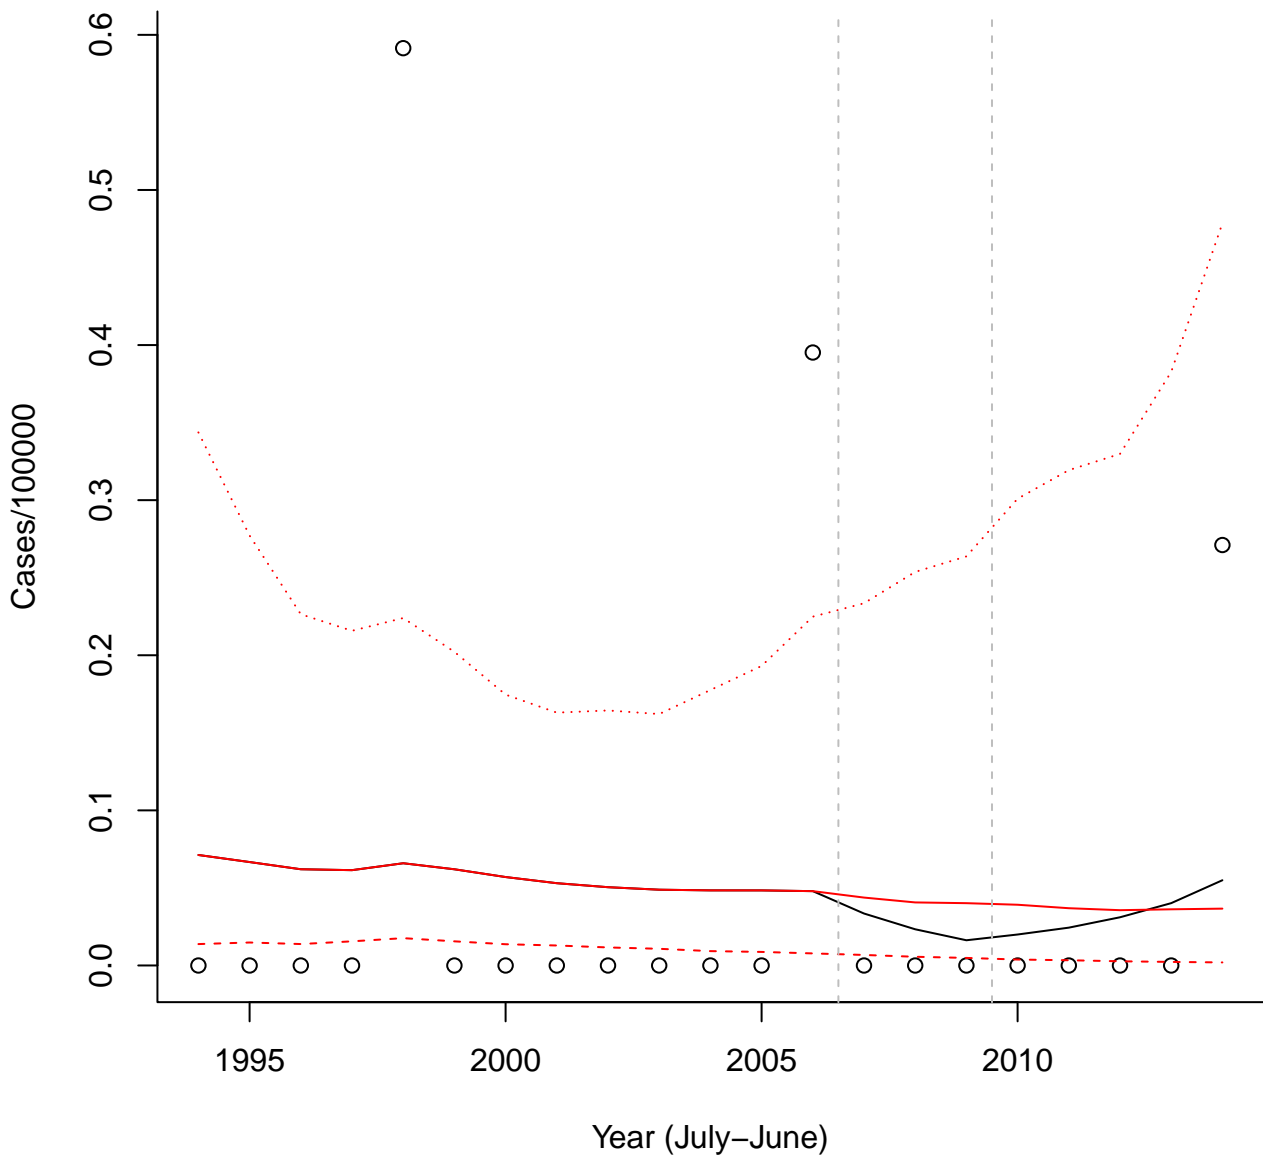

# 65+y With comorbidity Serotype 18B

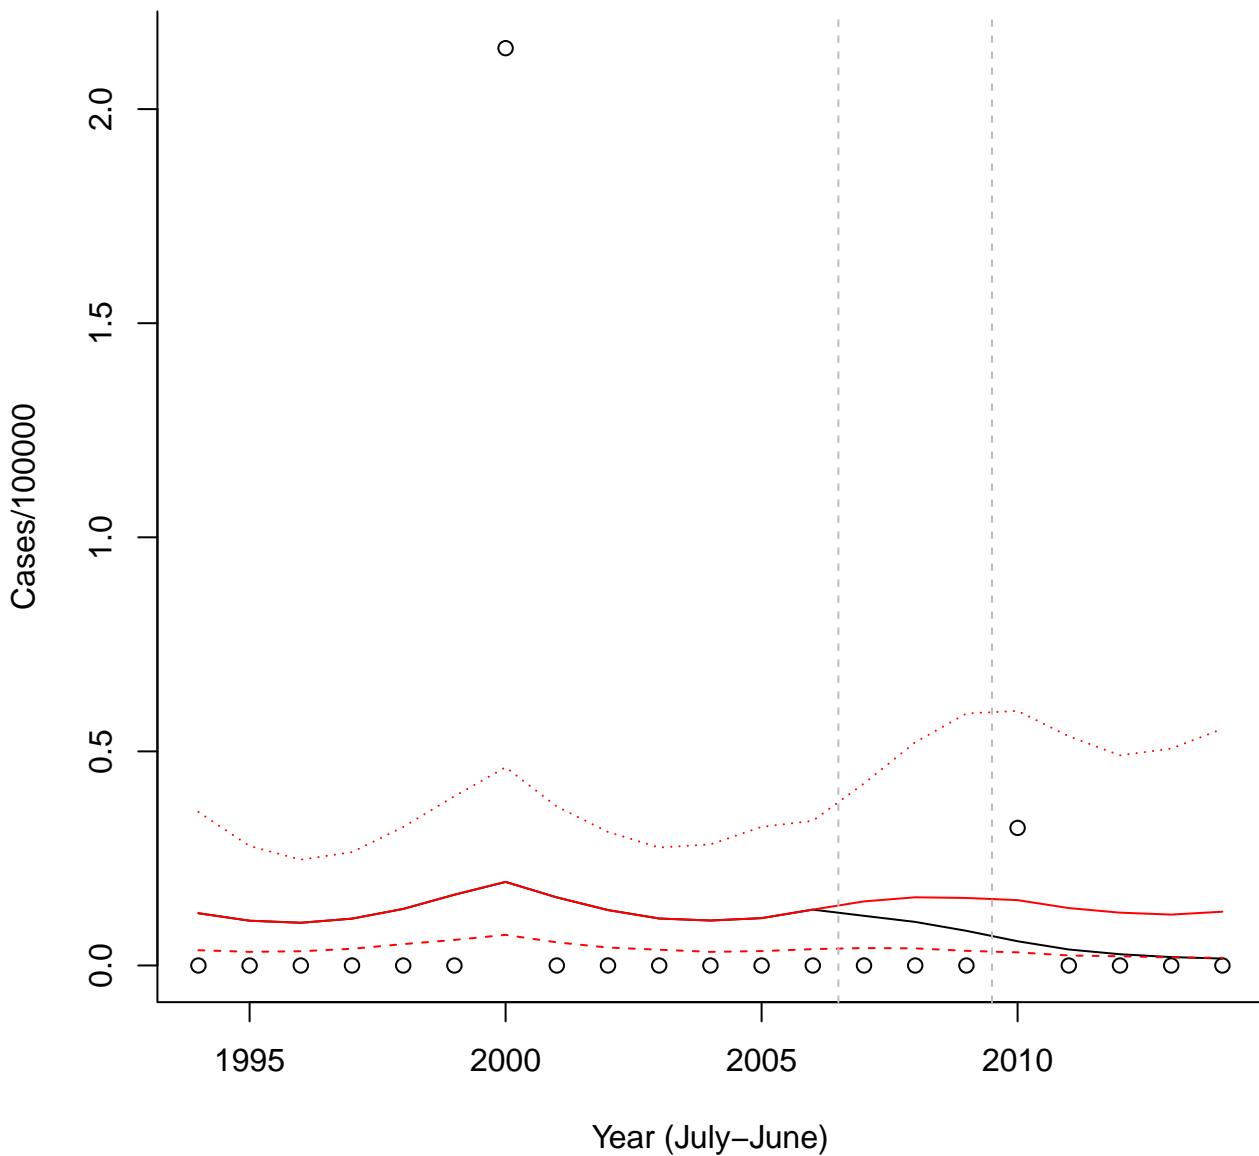

# 65+y With comorbidity Serotype 18C

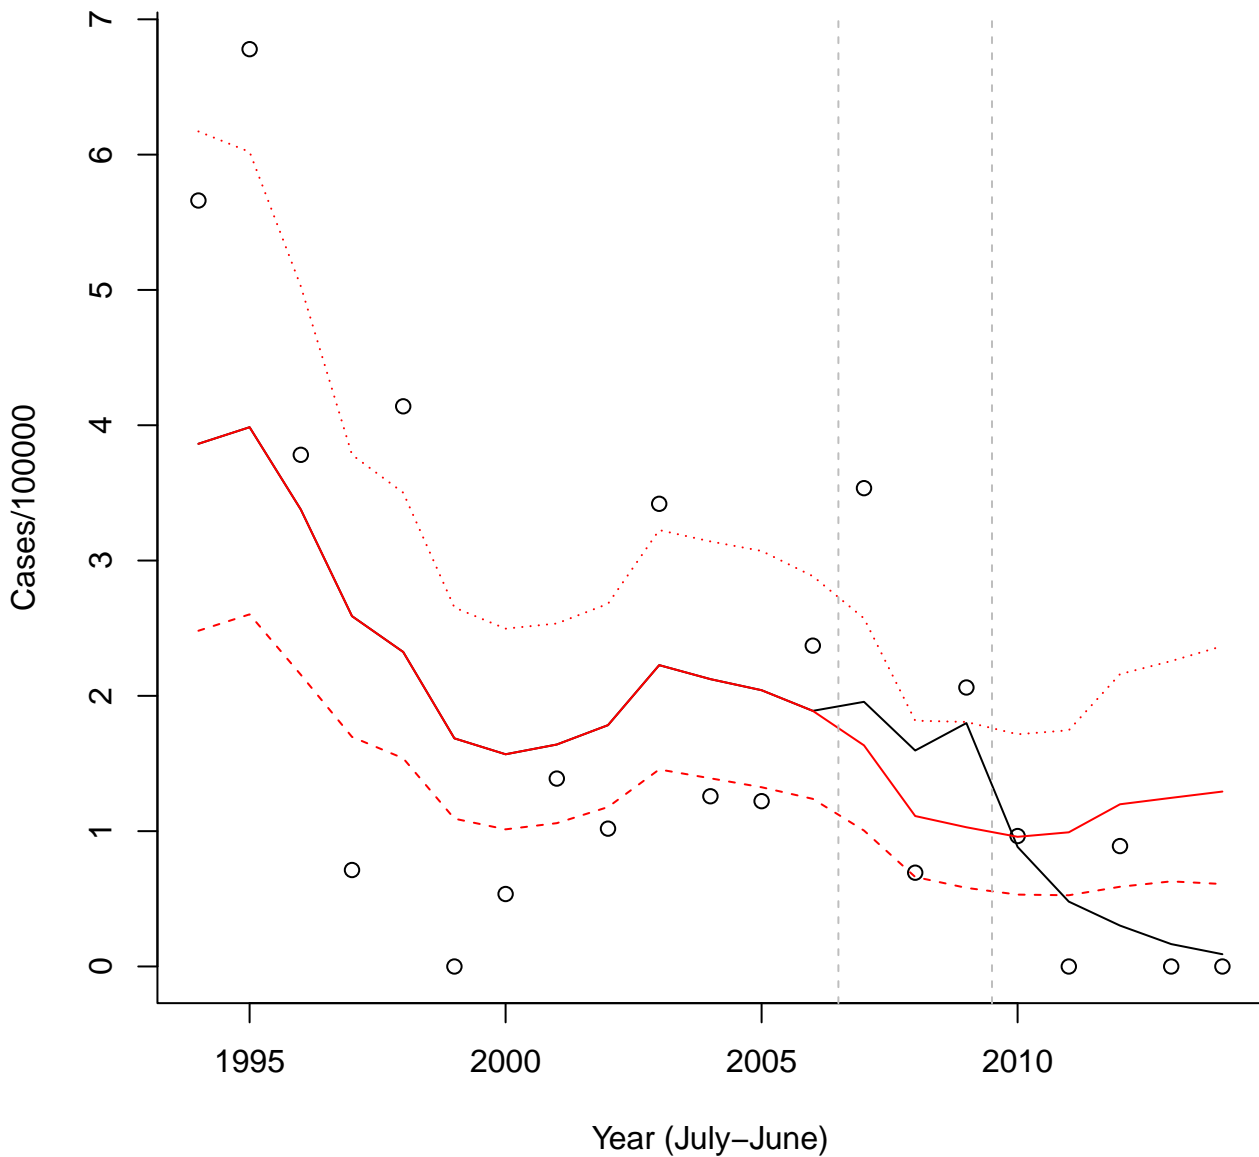

# 65+y With comorbidity Serotype 18F

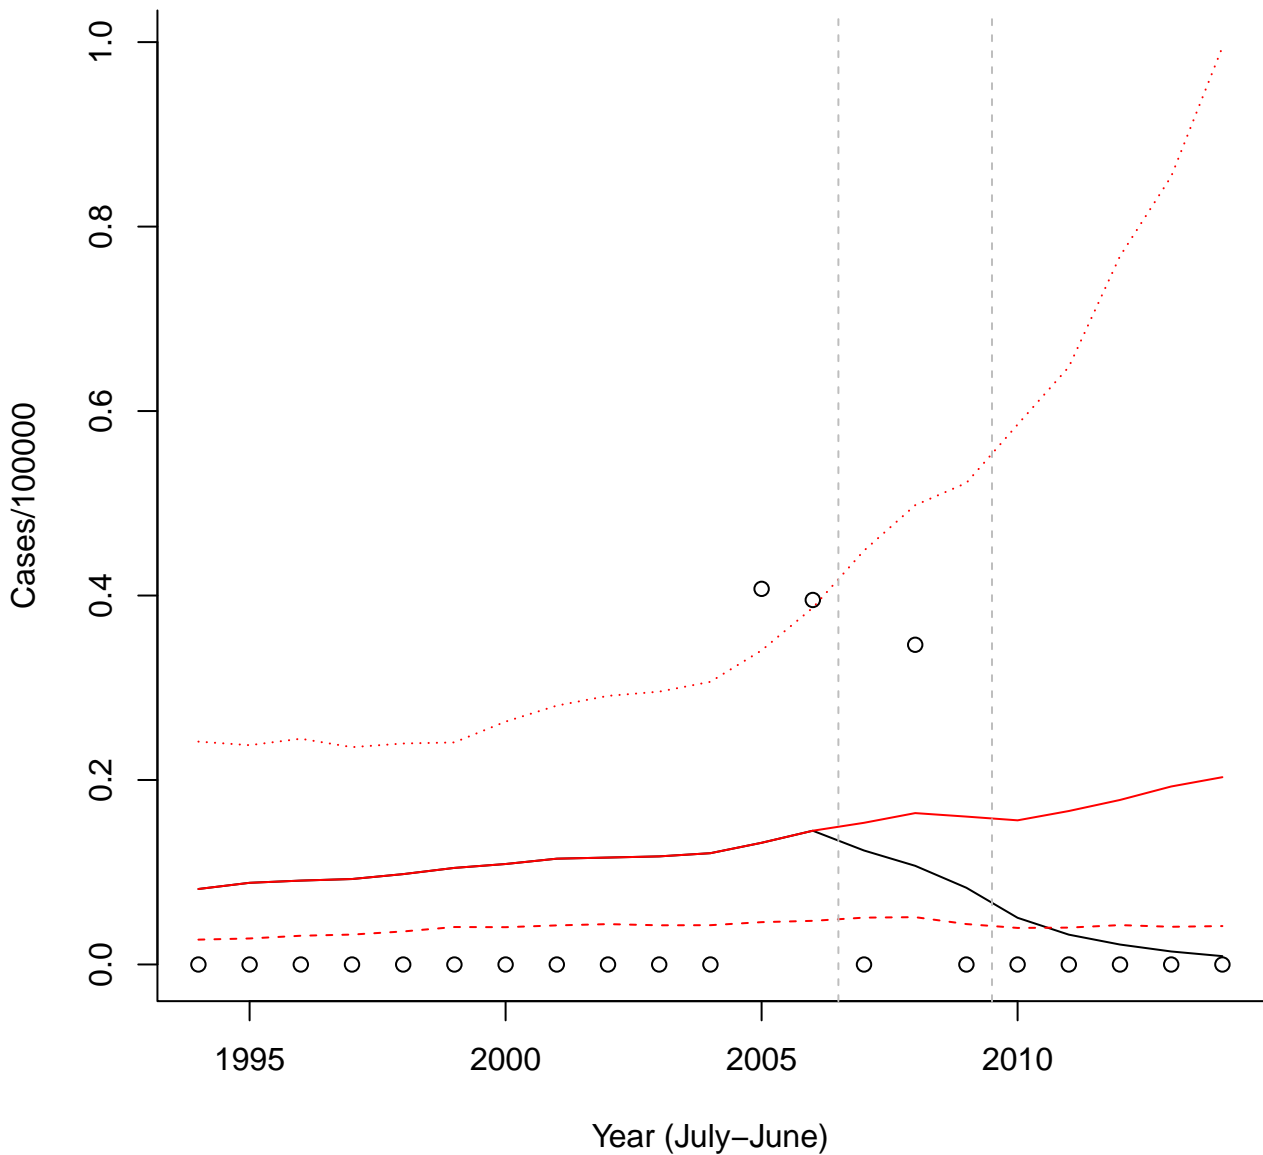

# 65+y With comorbidity Serotype 19A

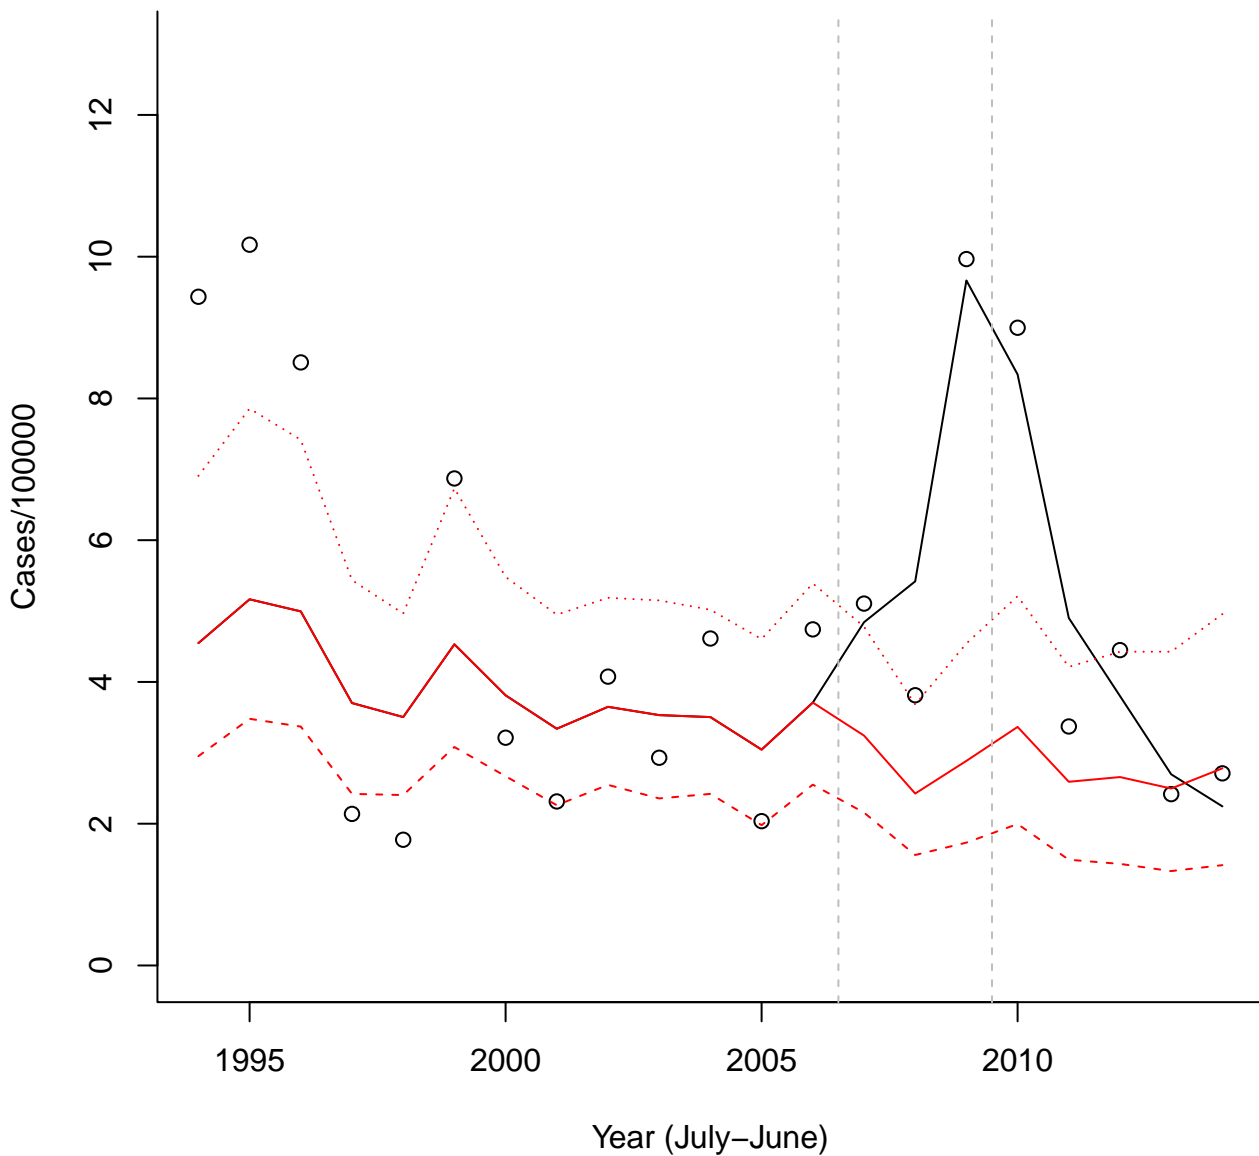

# 65+y With comorbidity Serotype 19F

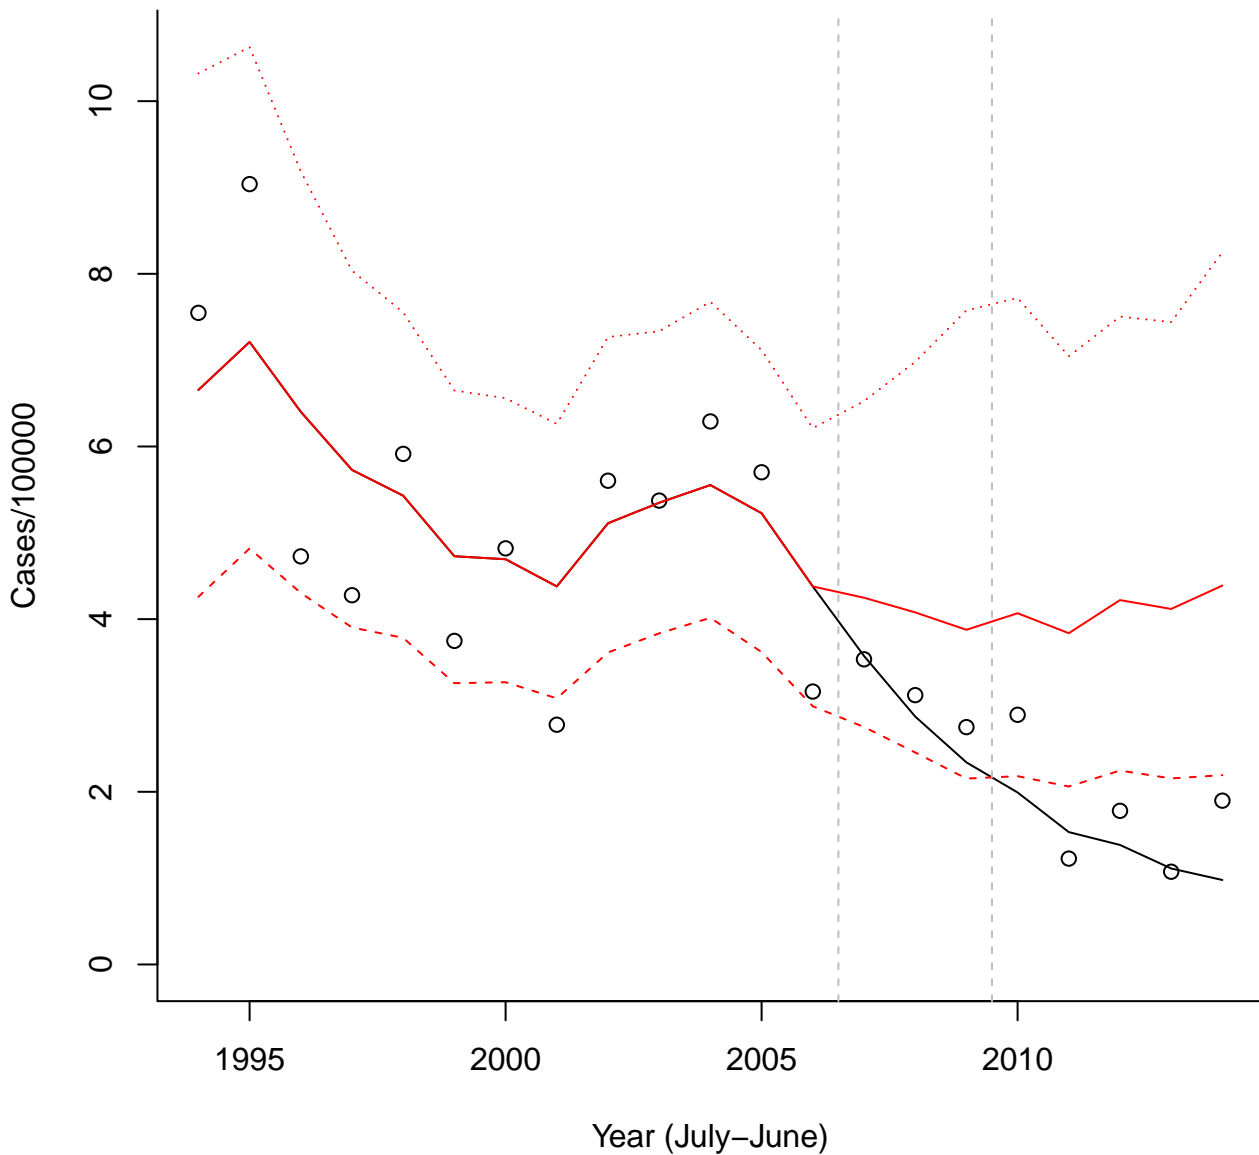

# 65+y With comorbidity Serotype 2

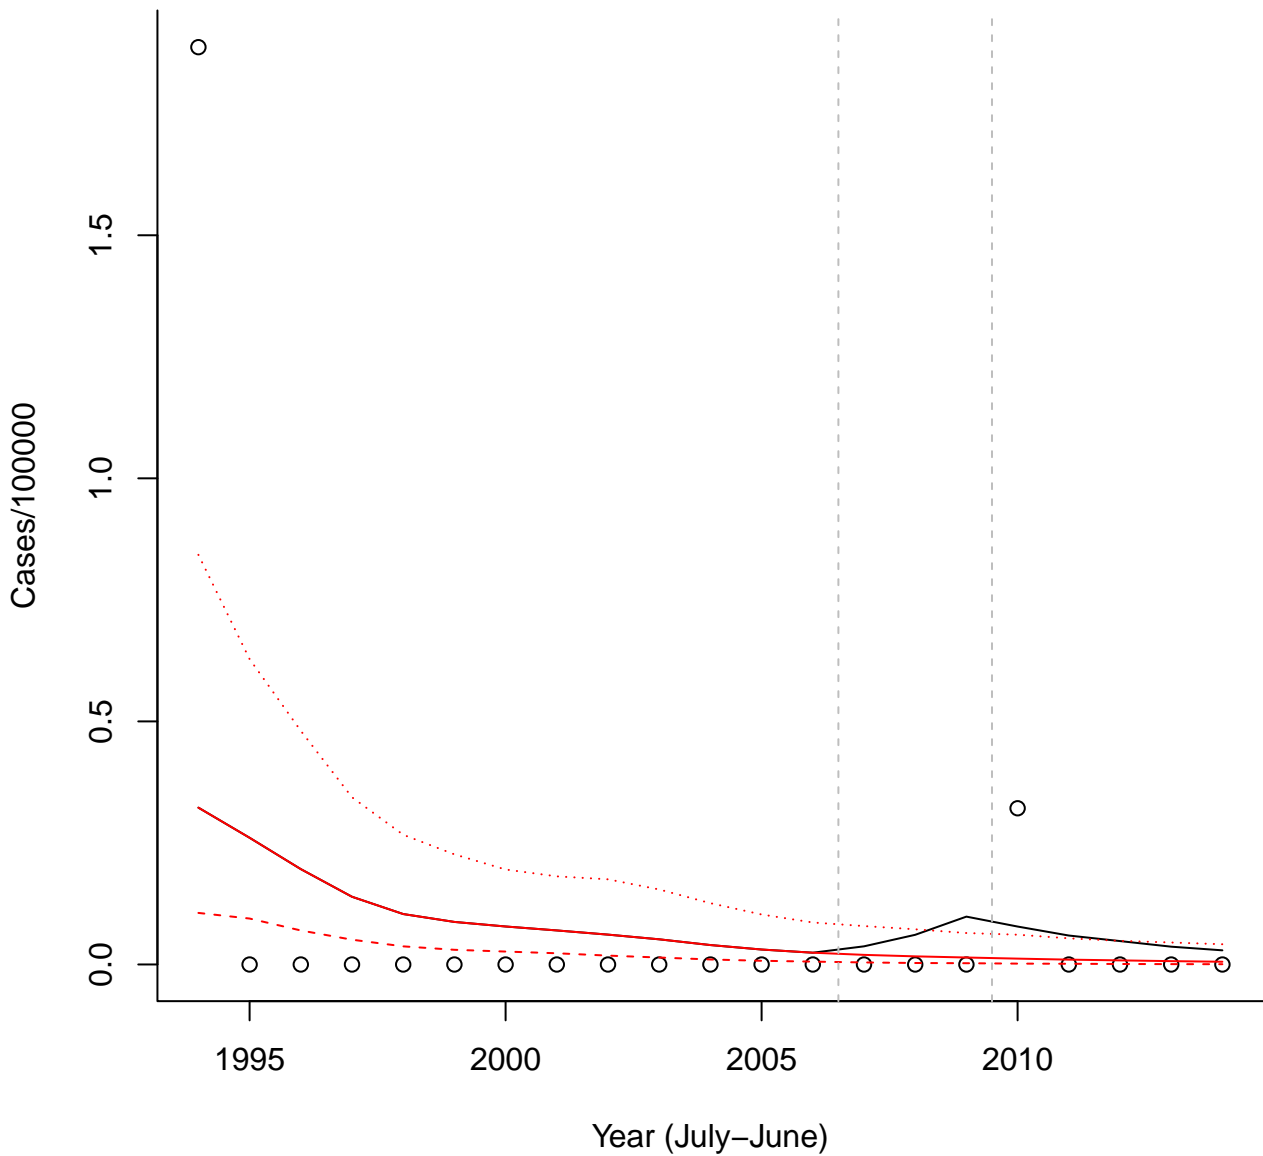

# 65+y With comorbidity Serotype 20

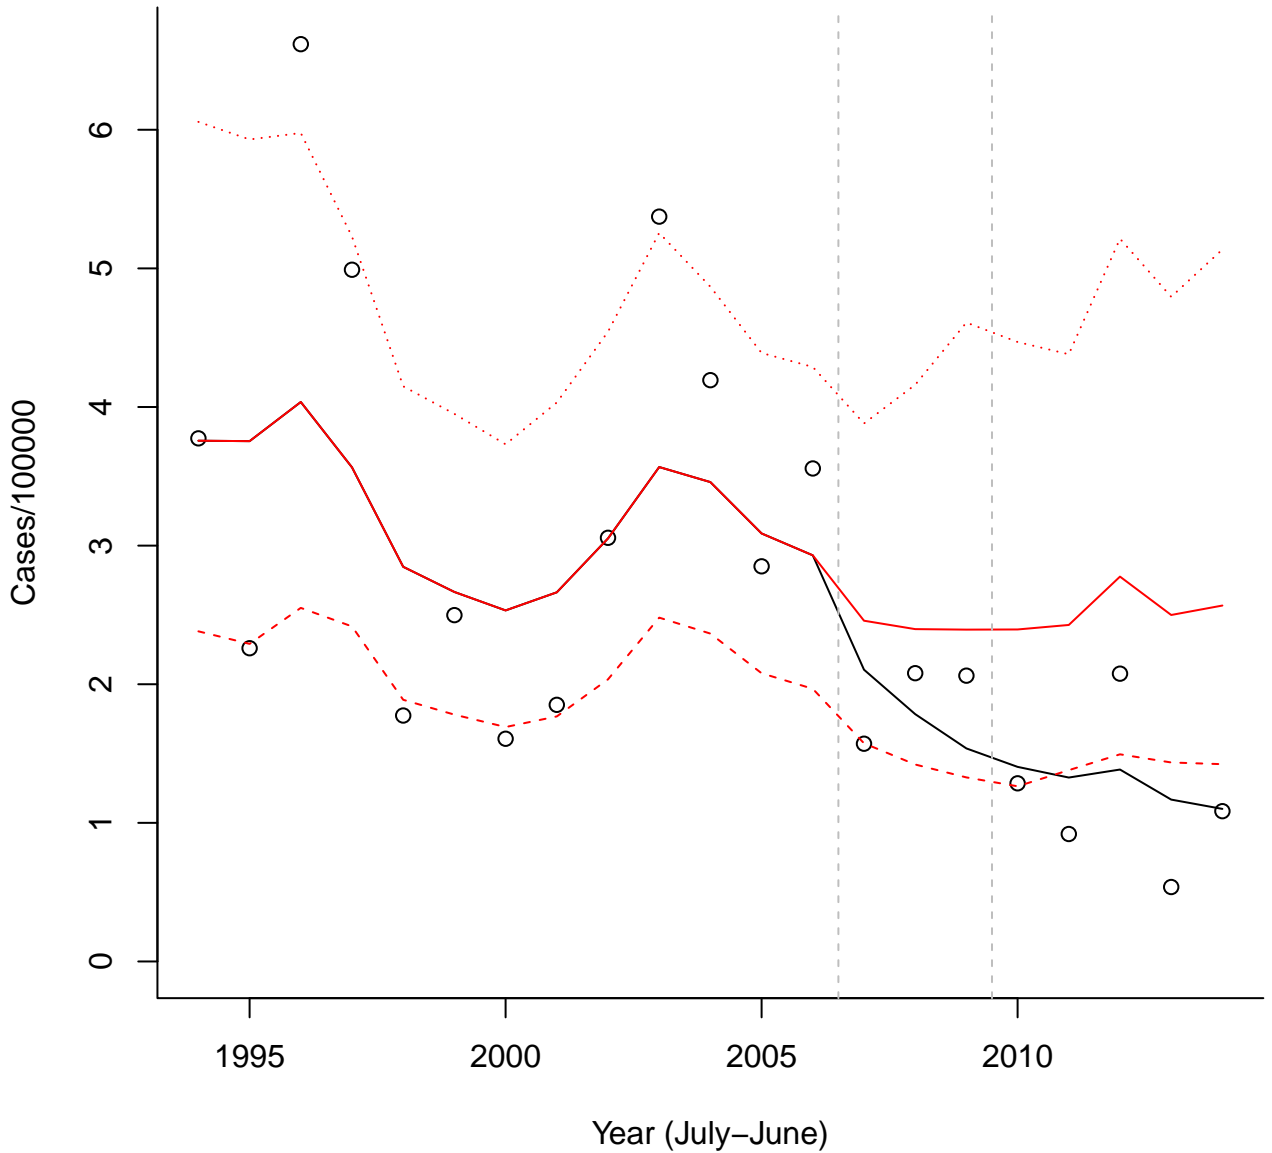



# 65+y With comorbidity Serotype 21

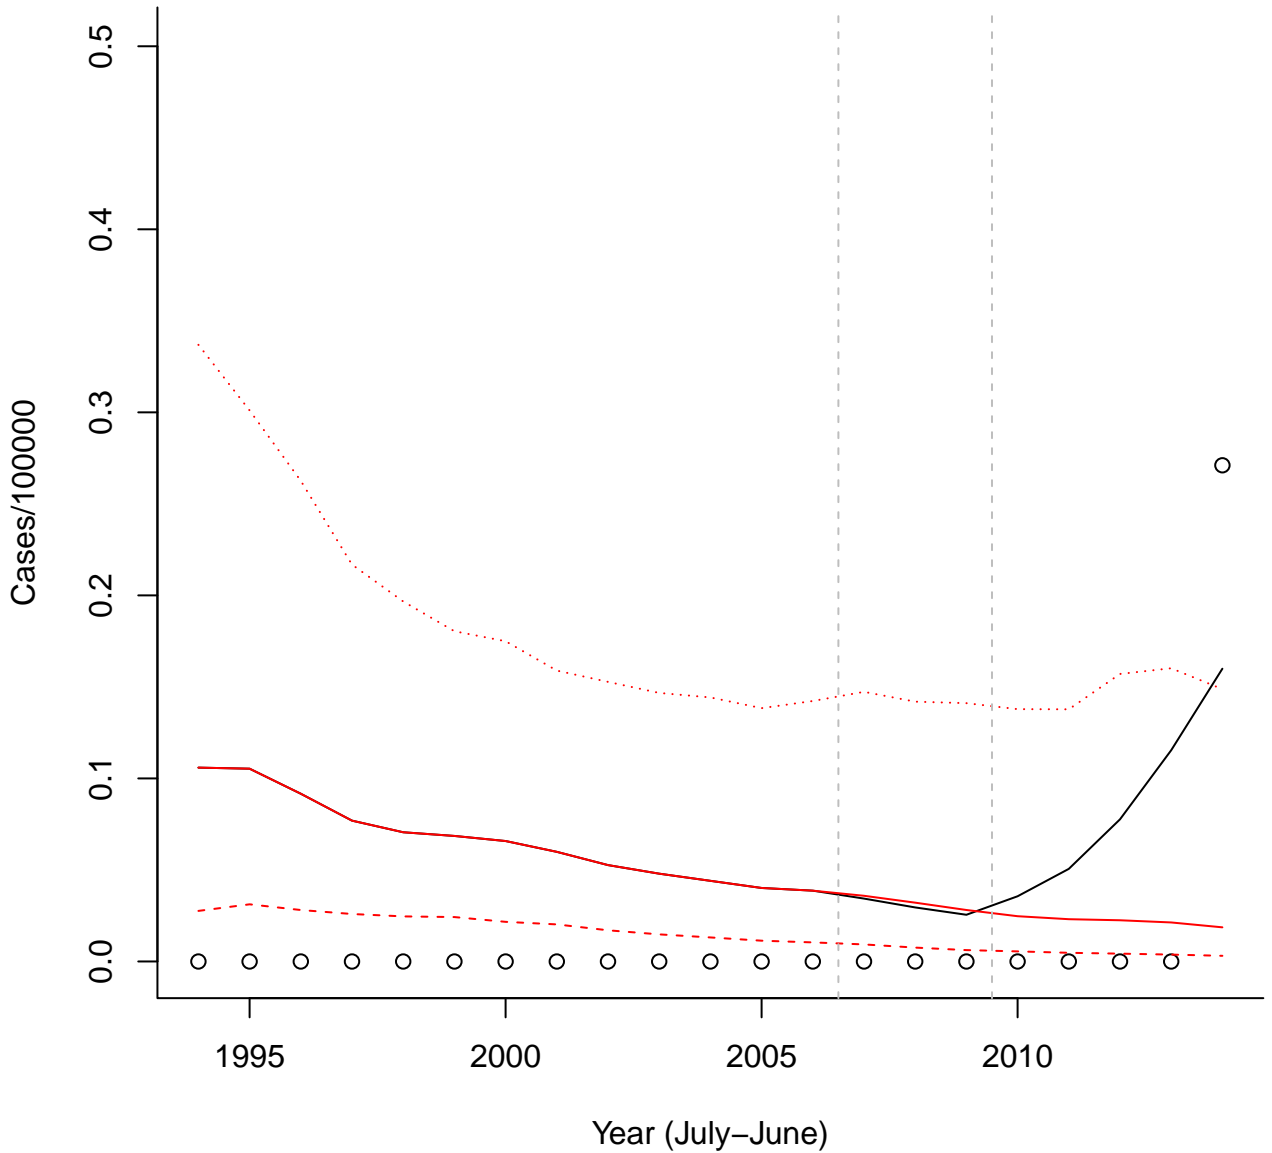

# 65+y With comorbidity Serotype 22F

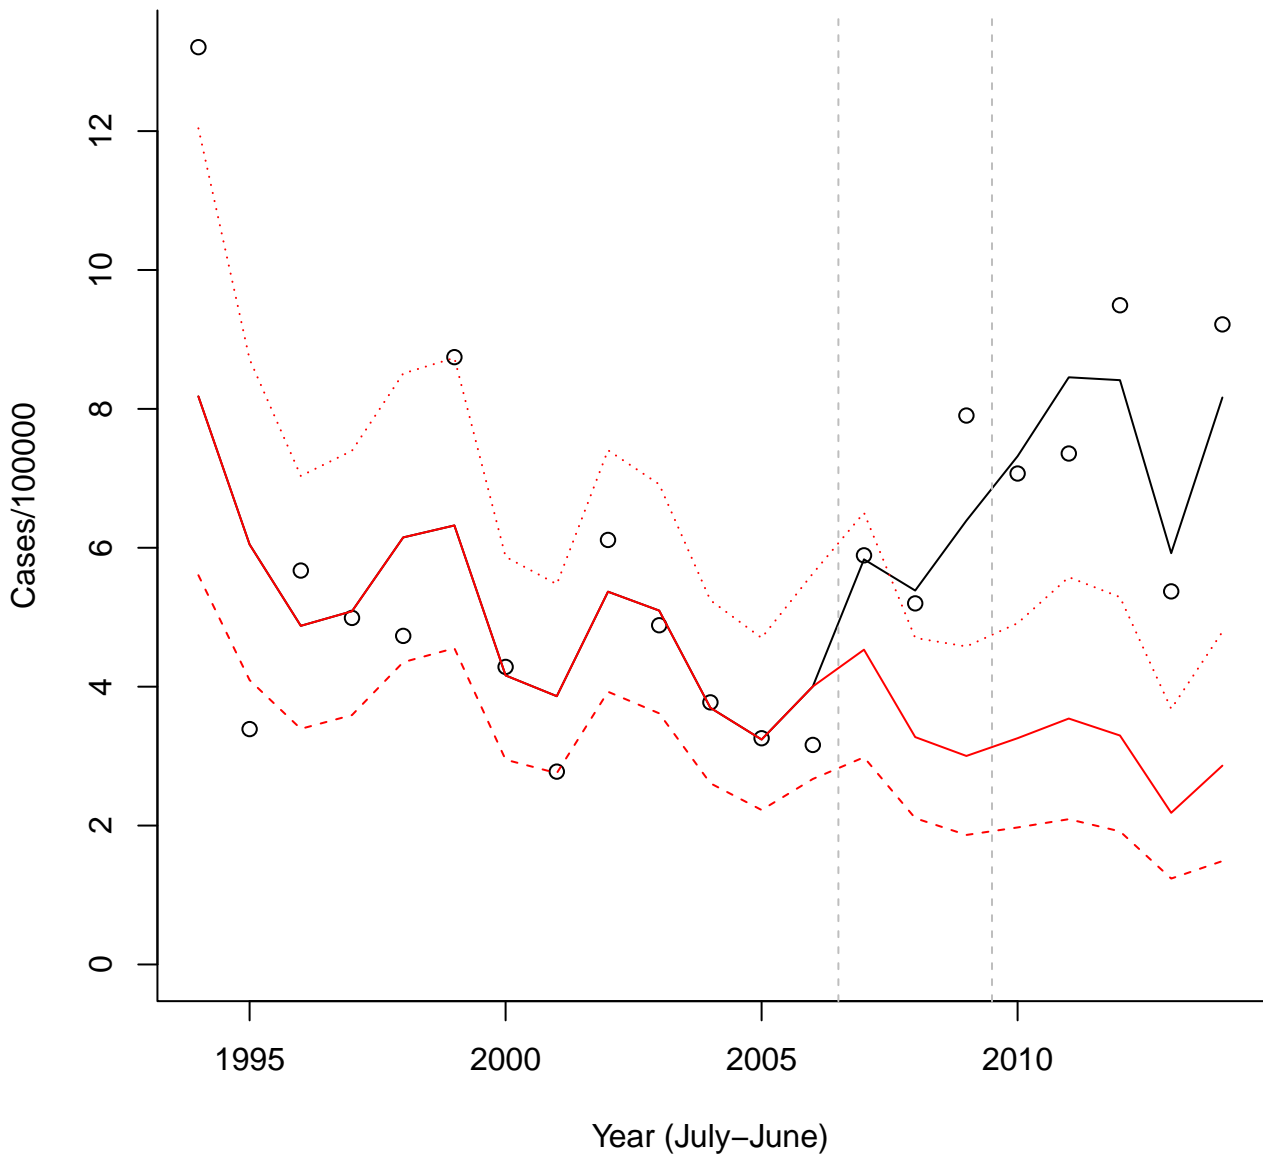

# 65+y With comorbidity Serotype 23A

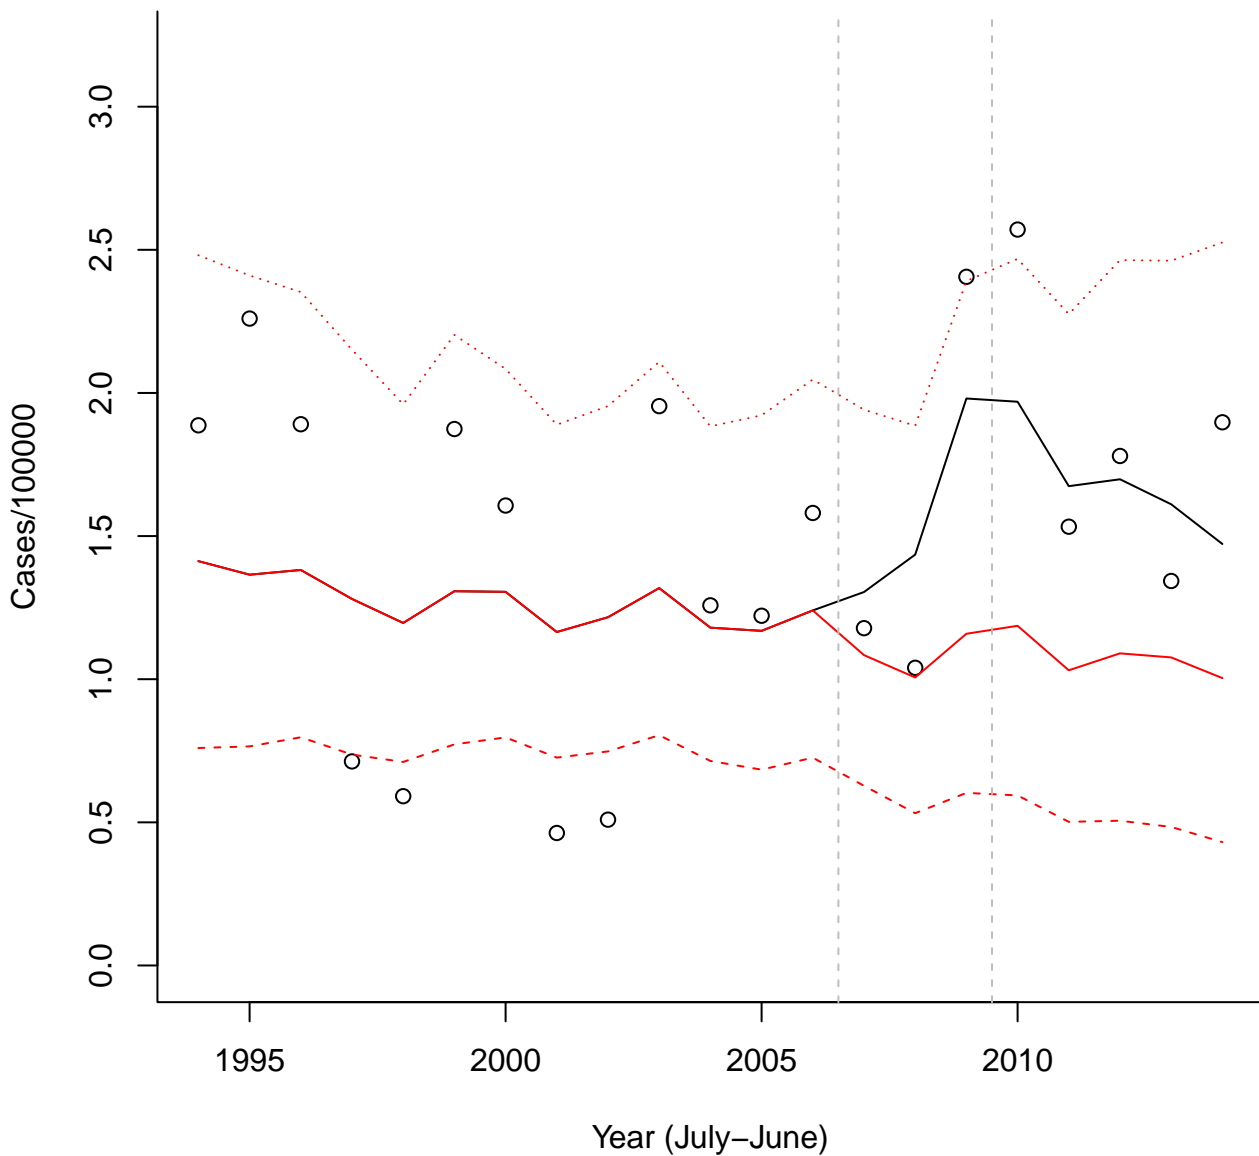

# 65+y With comorbidity Serotype 23B

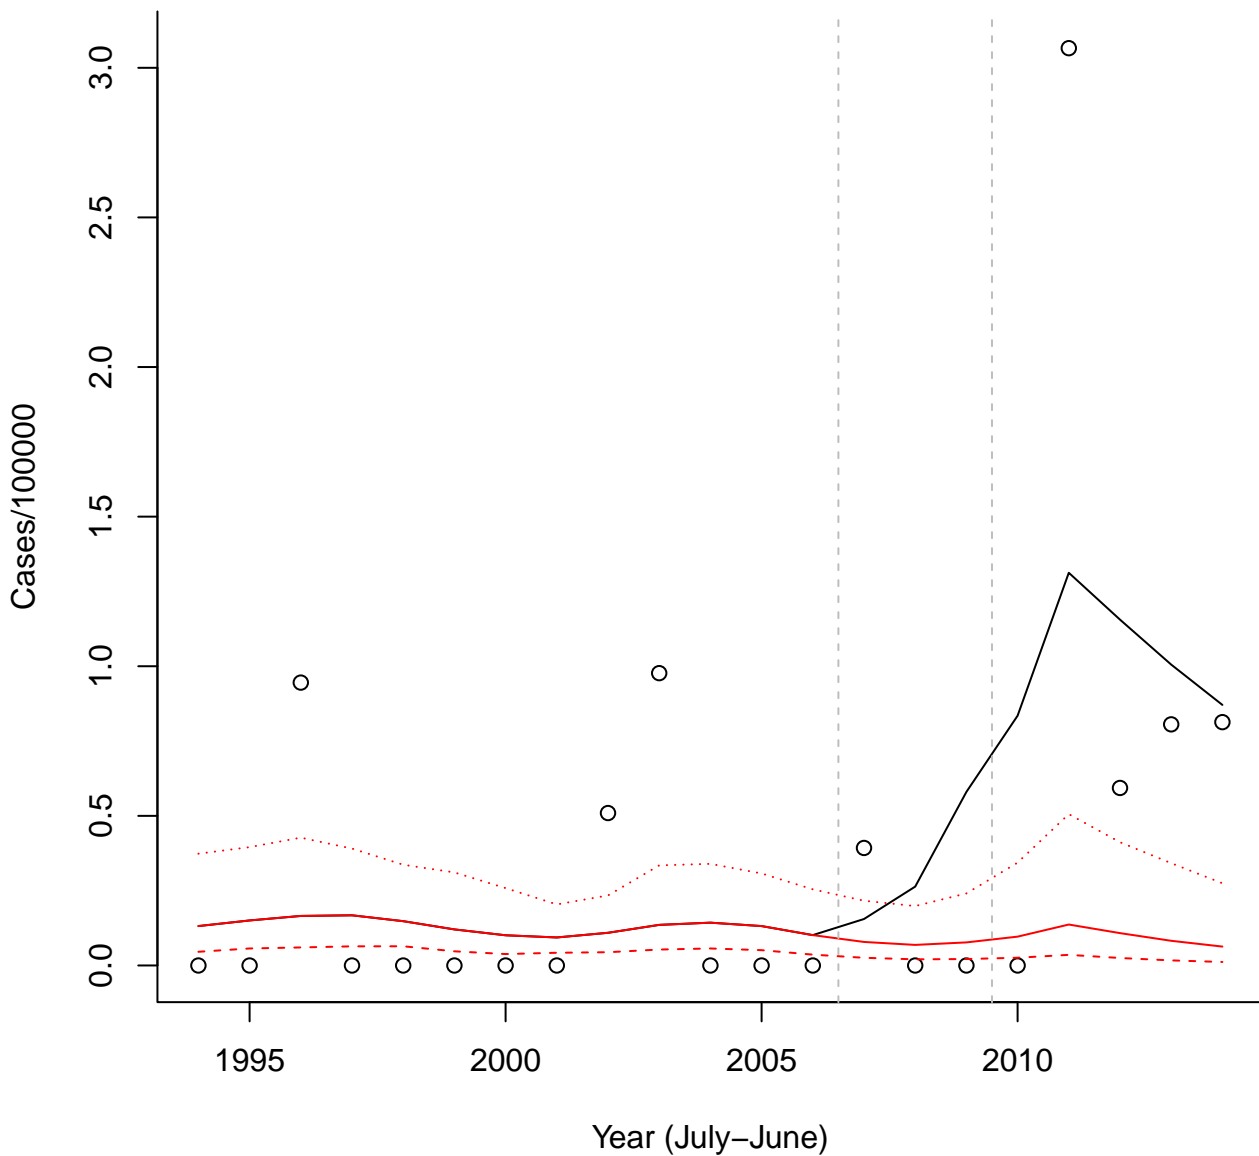

# 65+y With comorbidity Serotype 23F

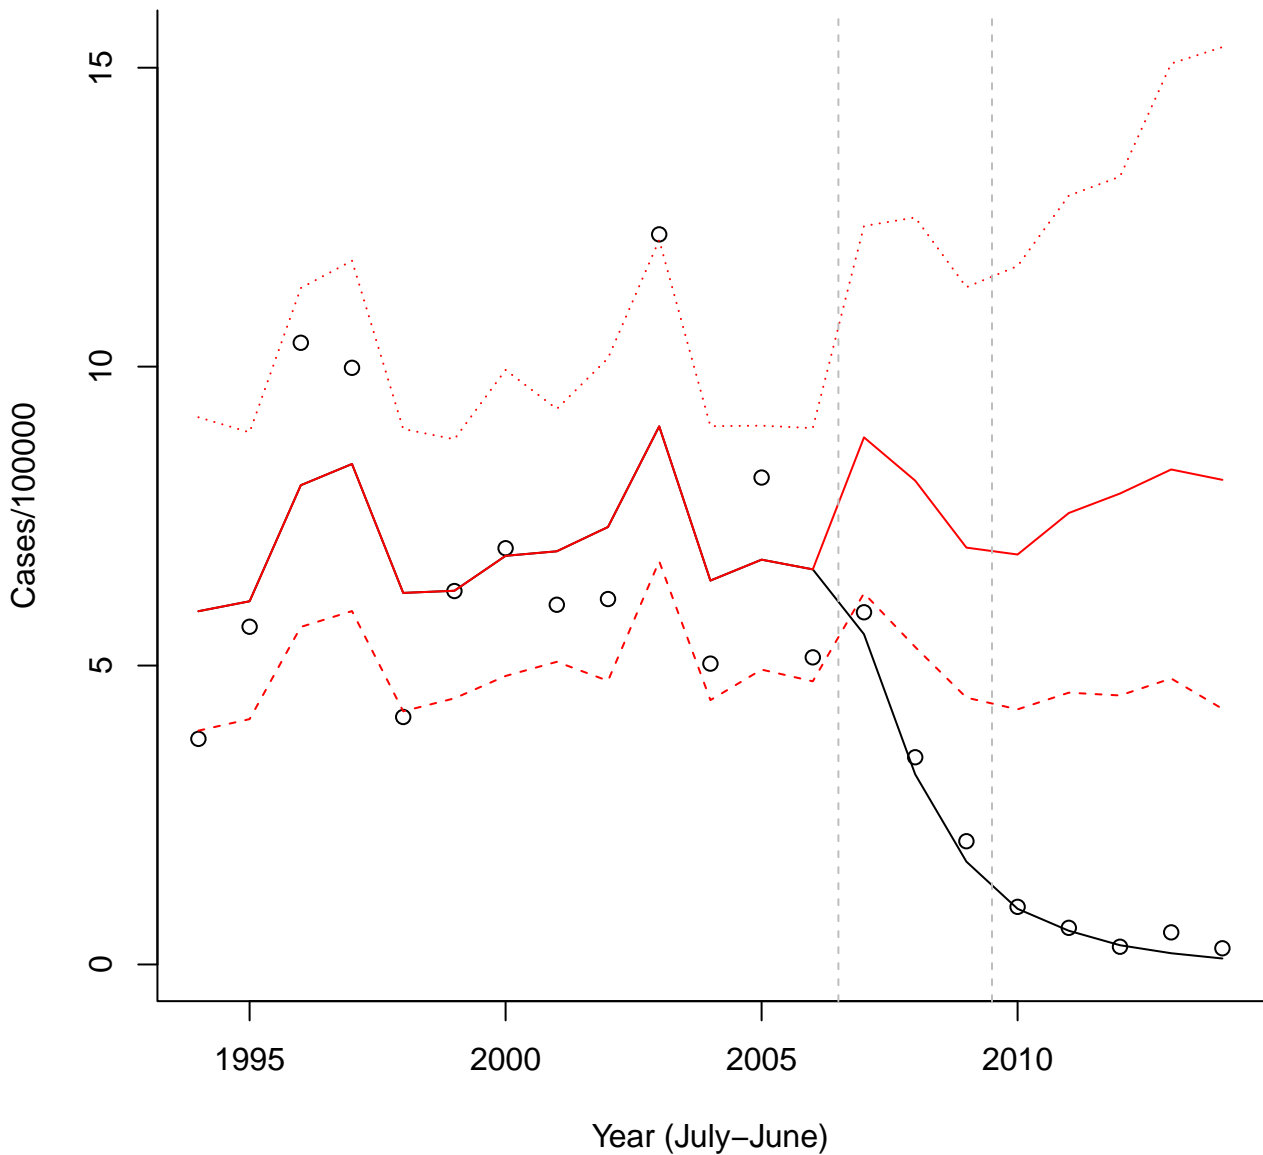

# 65+y With comorbidity Serotype 24A

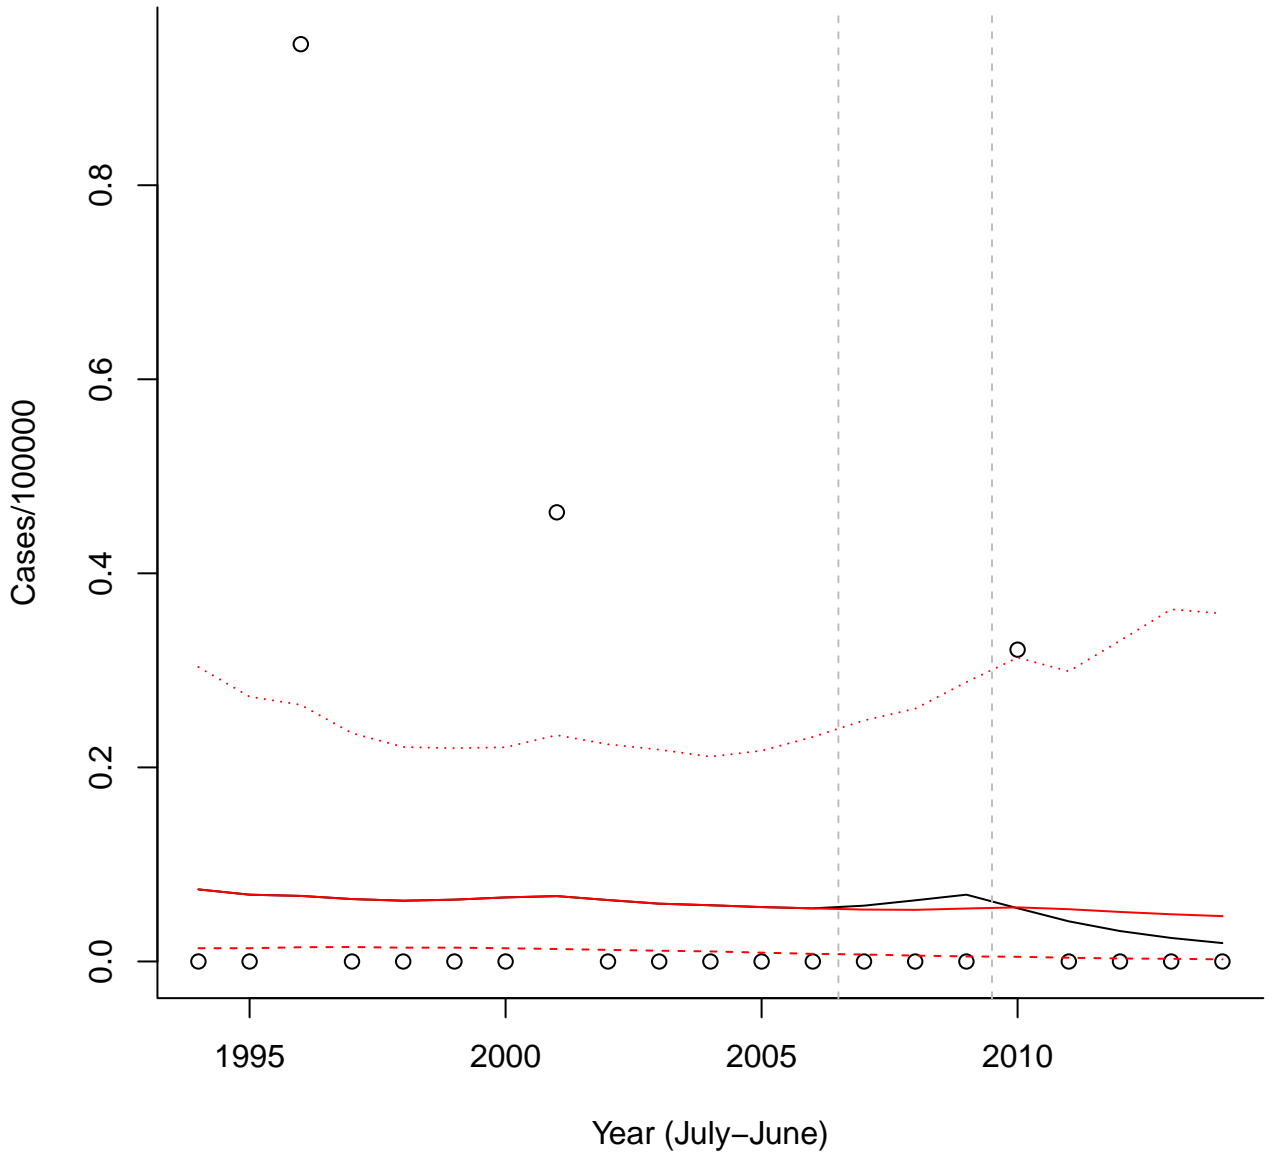

# 65+y With comorbidity Serotype 24F

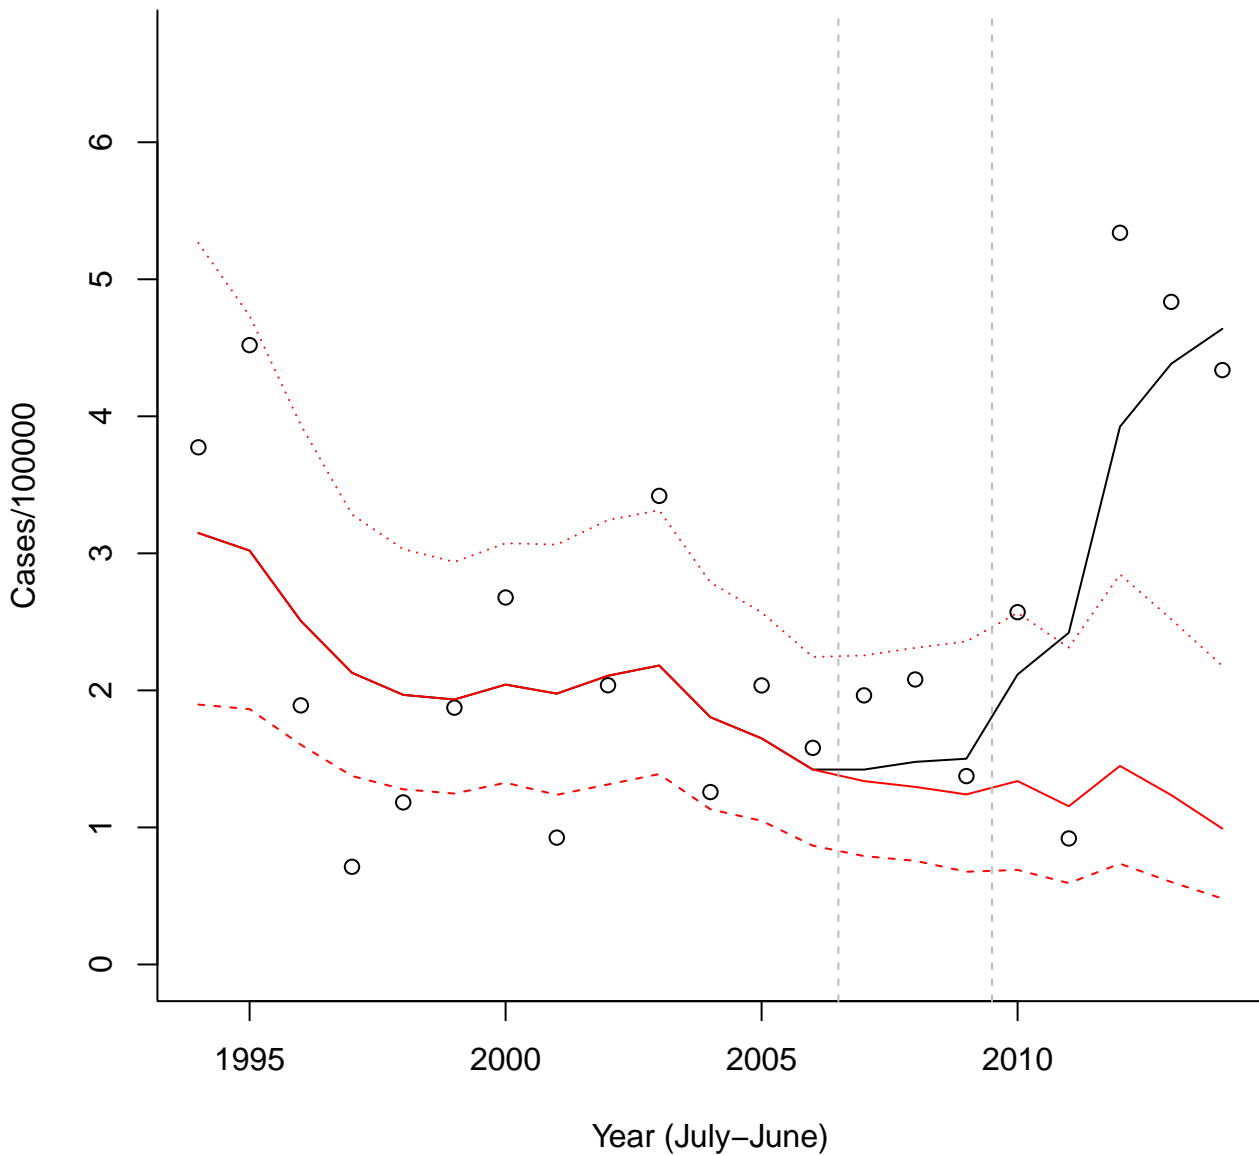

# 65+y With comorbidity Serotype 25A

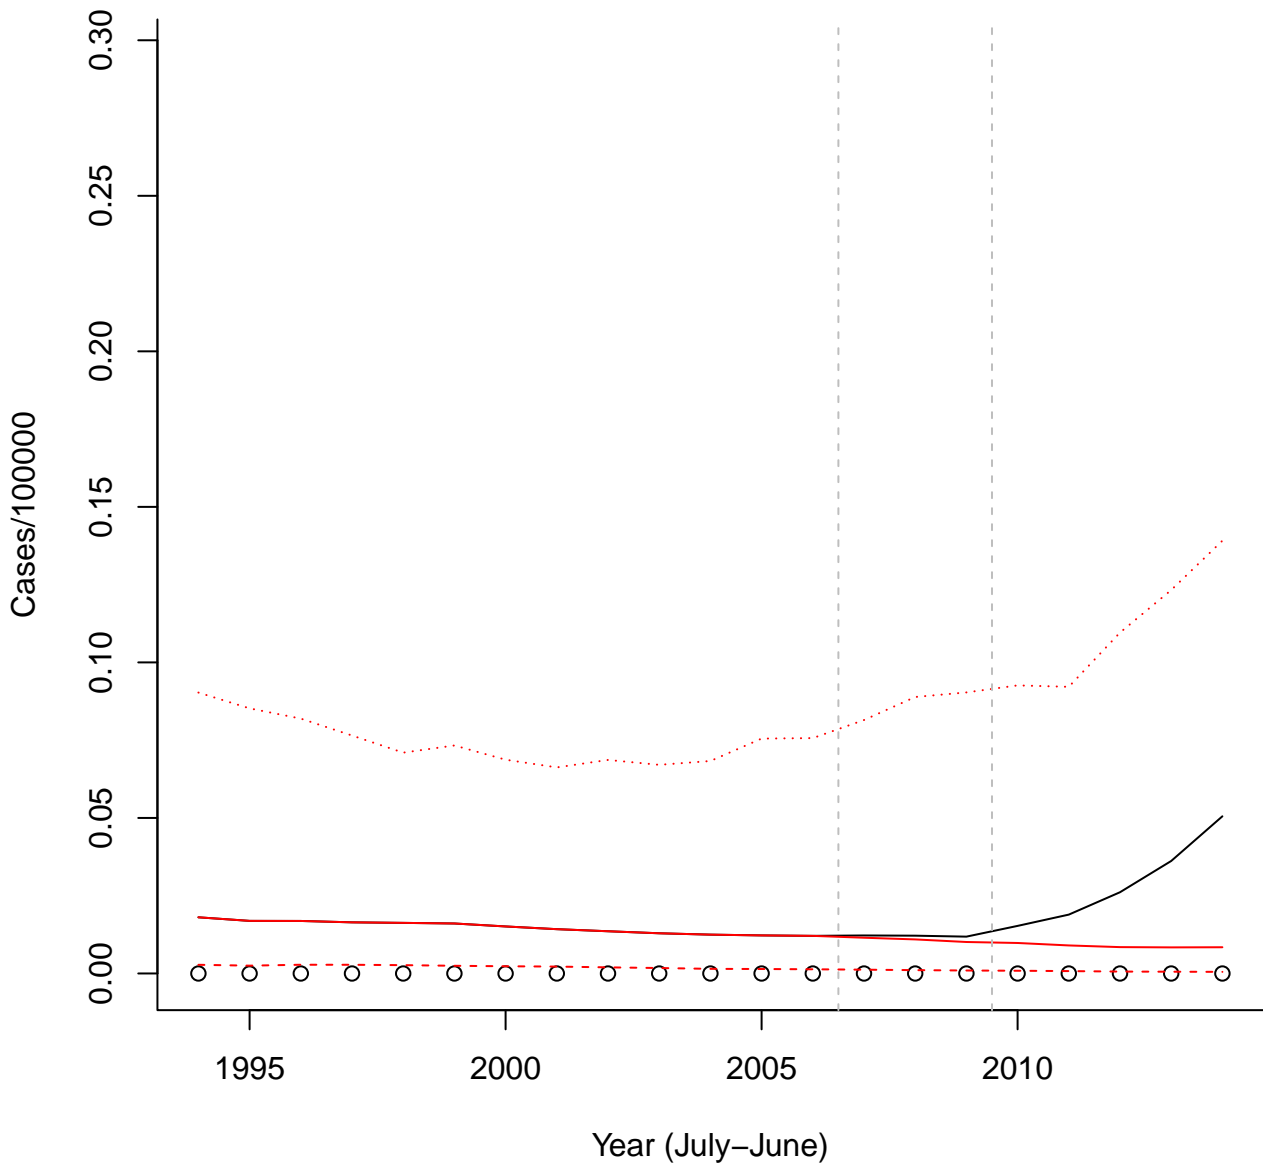



# 65+y With comorbidity Serotype 25F

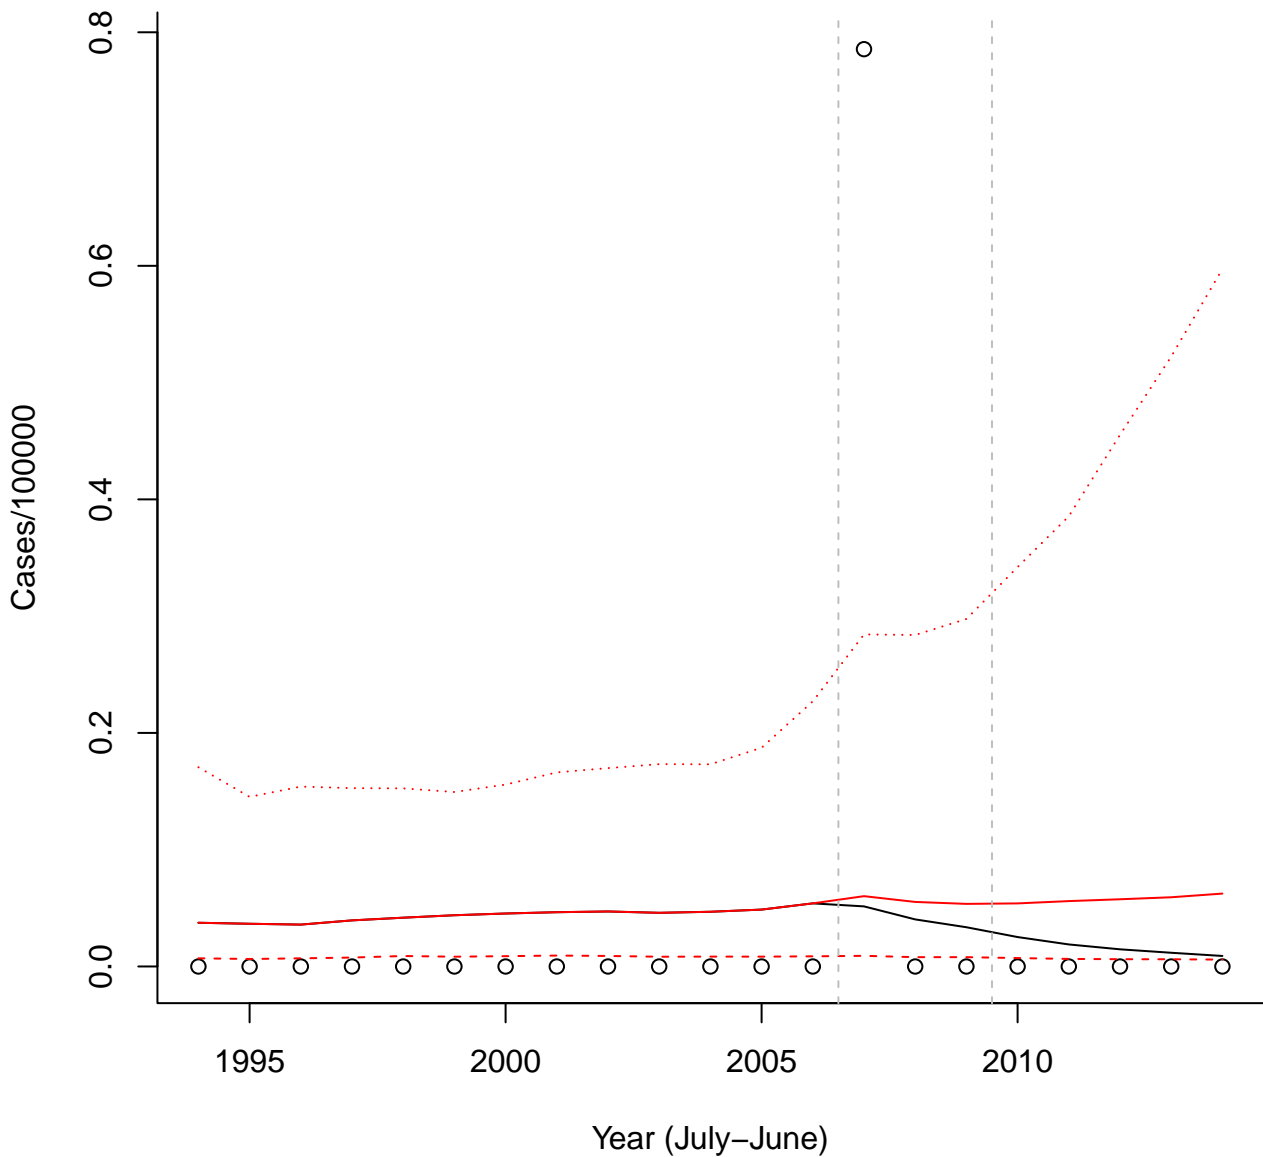

# 65+y With comorbidity Serotype 28F

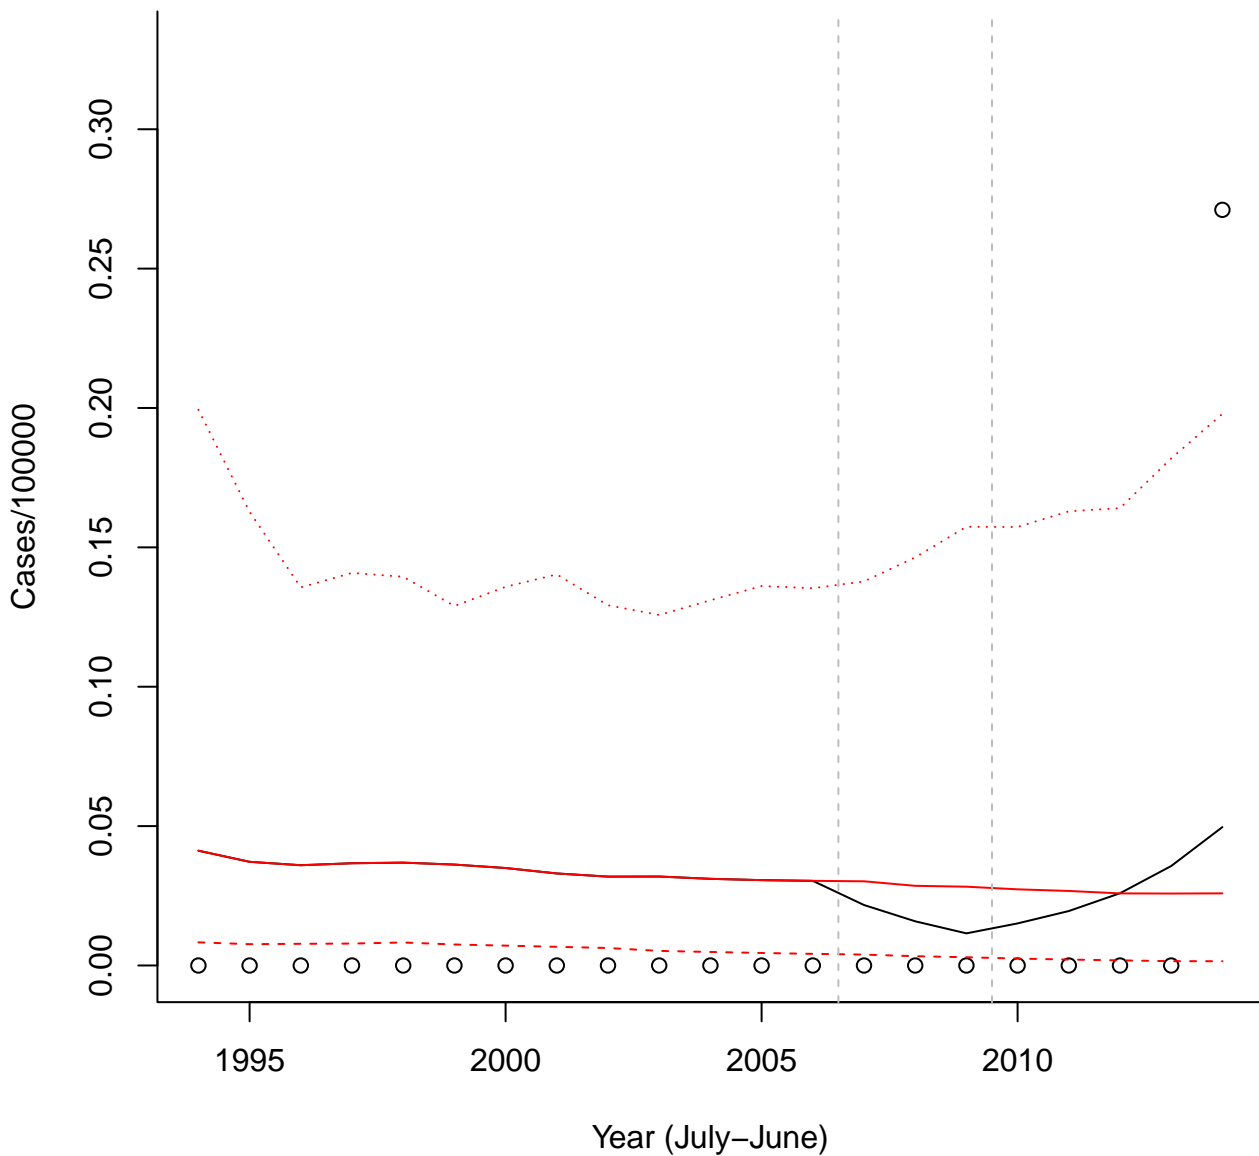

# 65+y With comorbidity Serotype 29

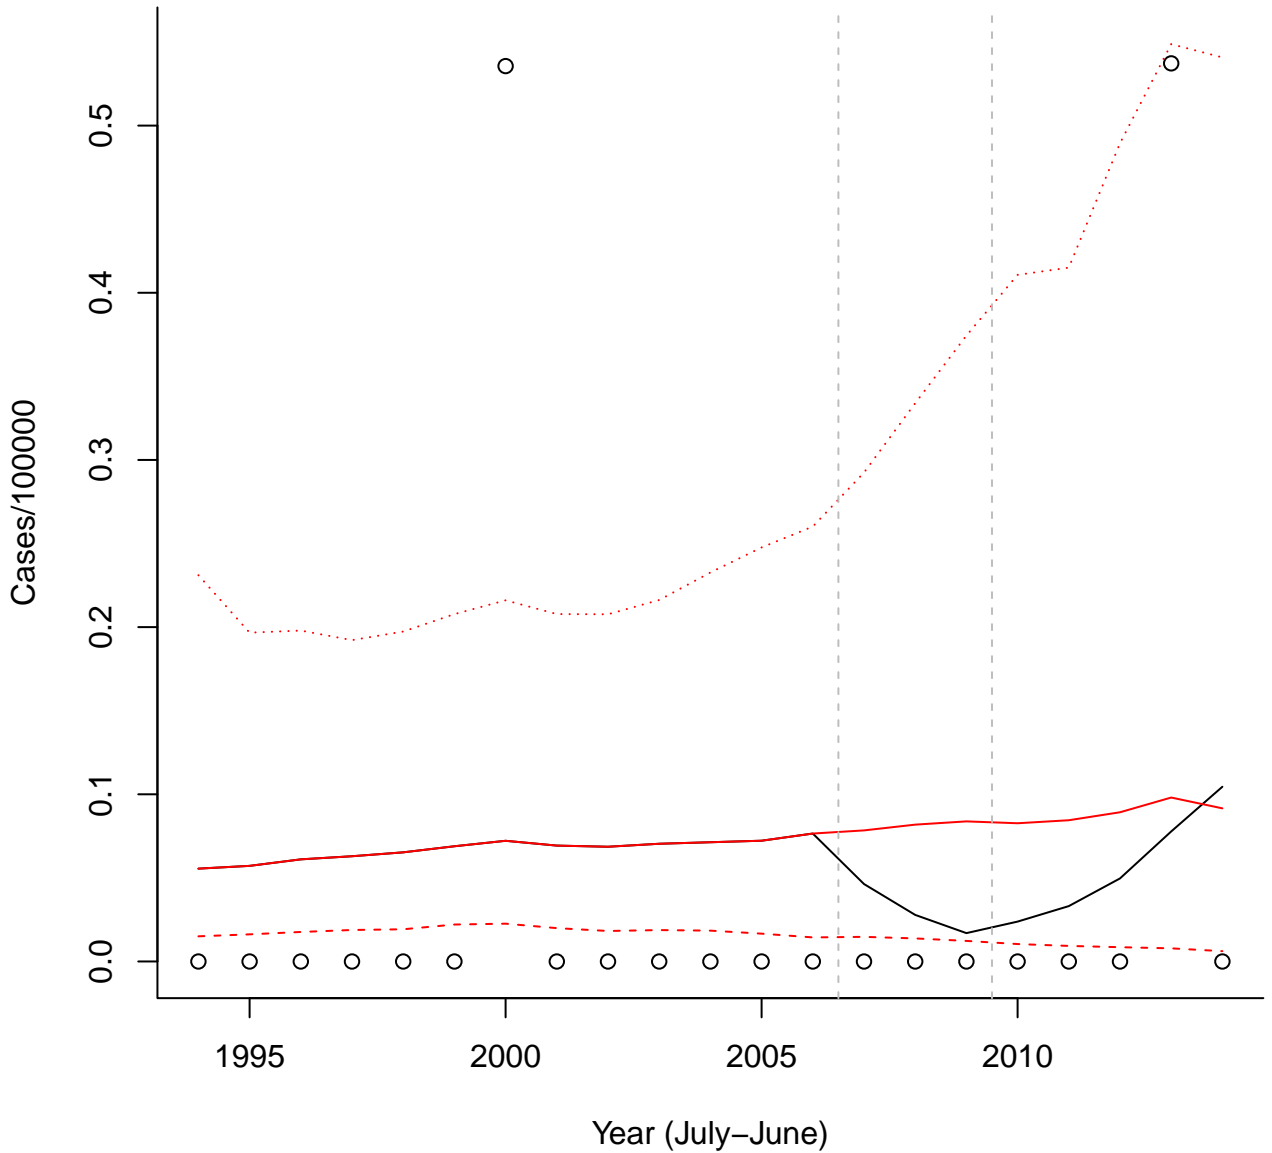

# 65+y With comorbidity Serotype 3

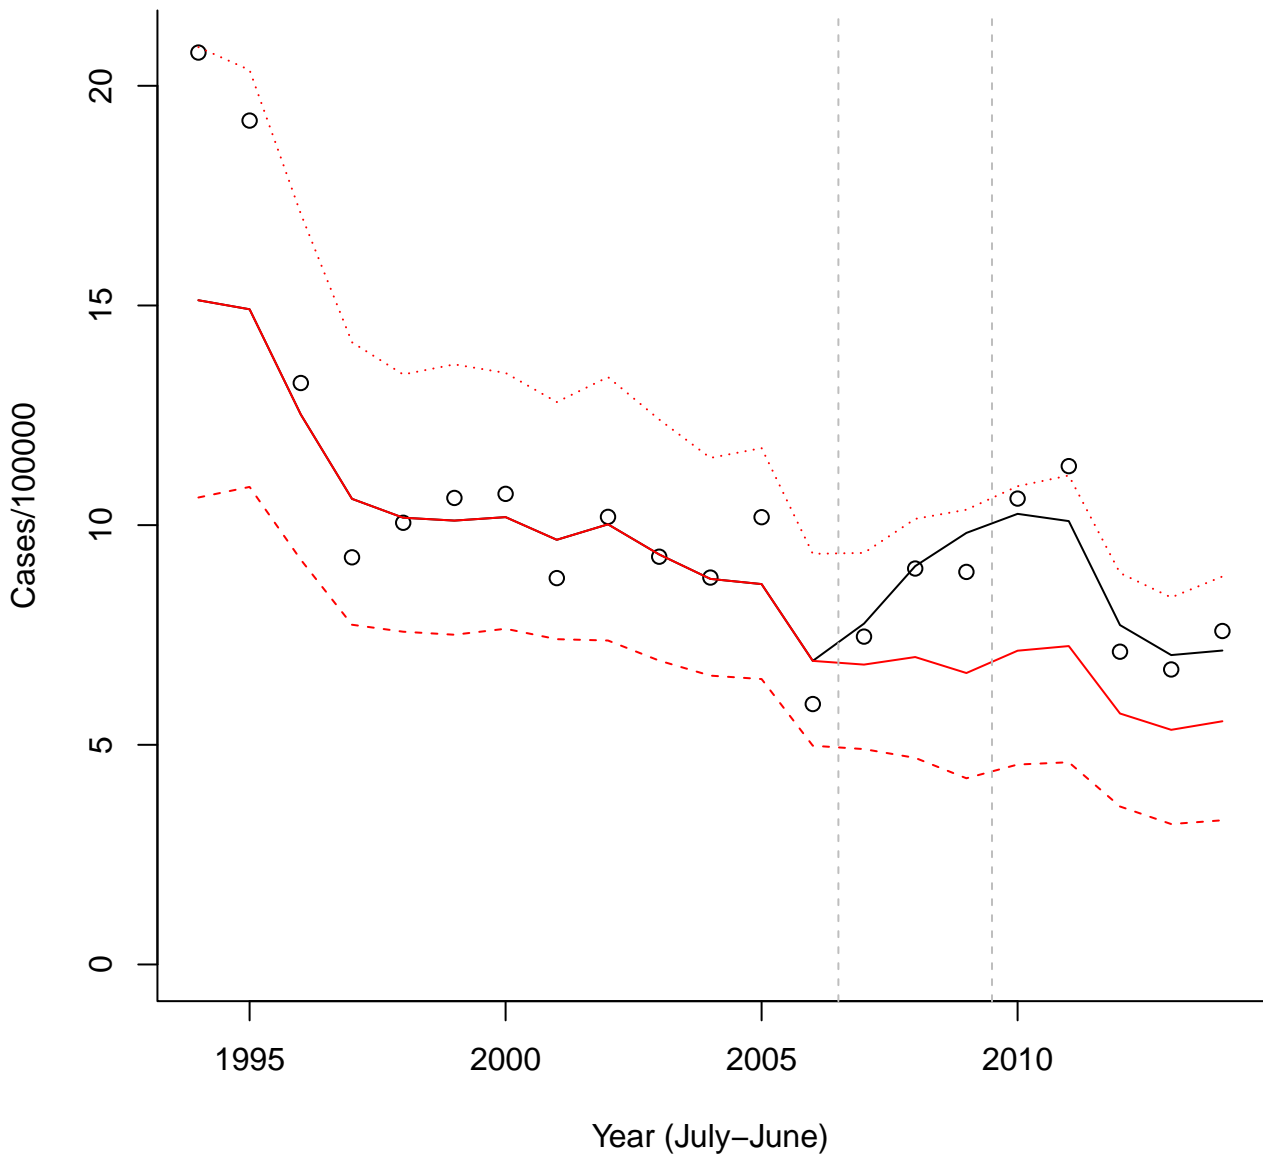

# 65+y With comorbidity Serotype 31

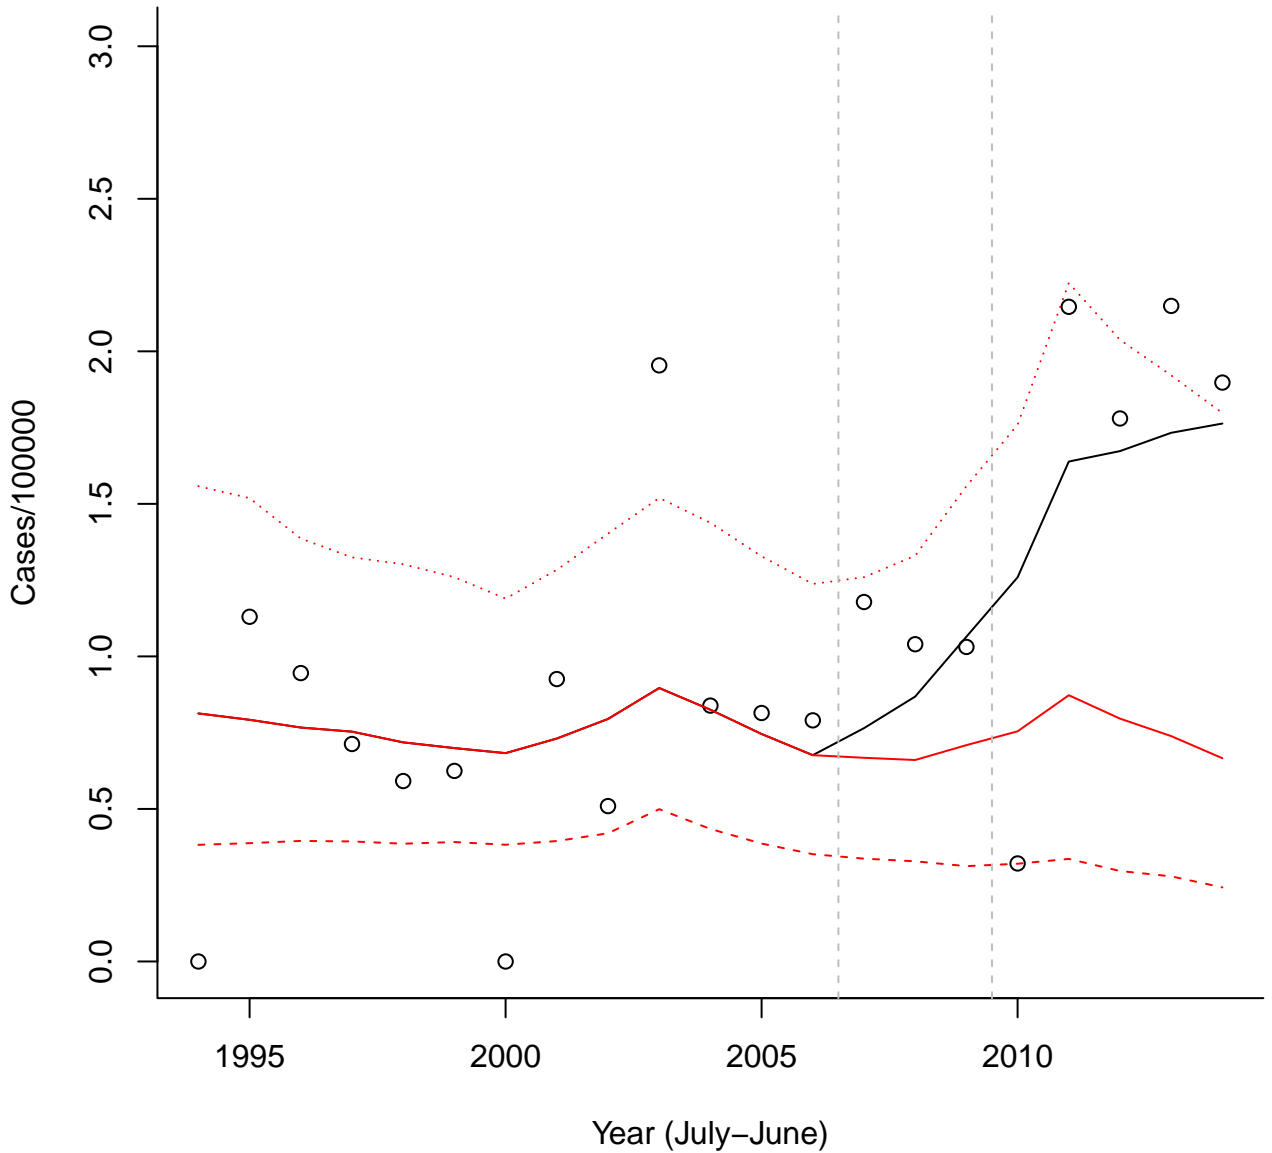

# 65+y With comorbidity Serotype 32A

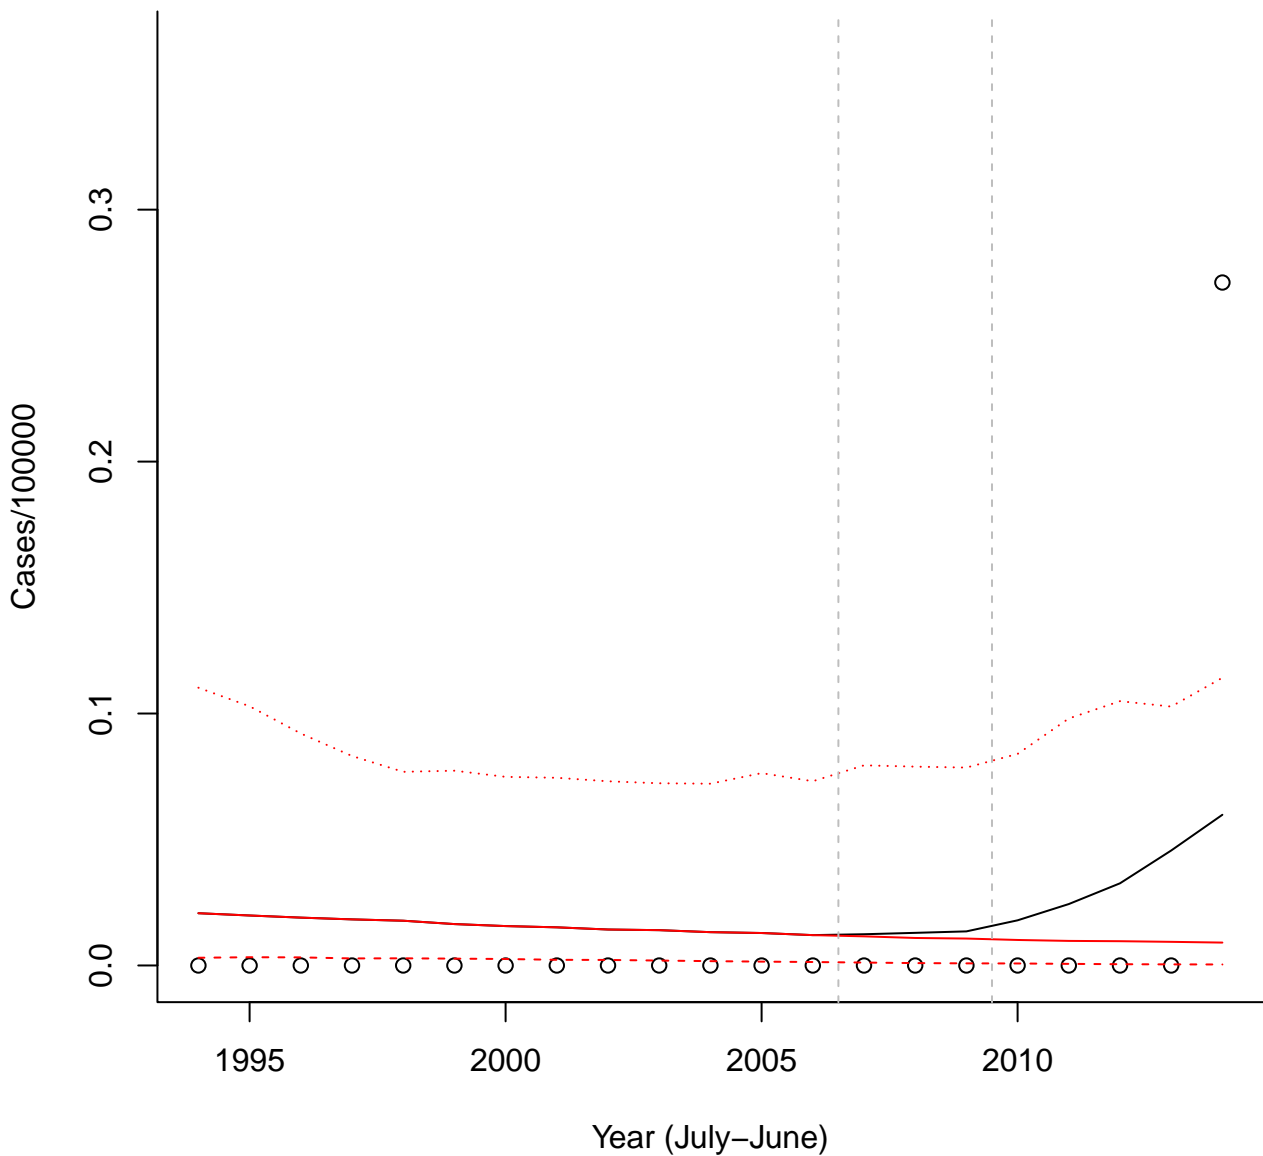

# 65+y With comorbidity Serotype 33A

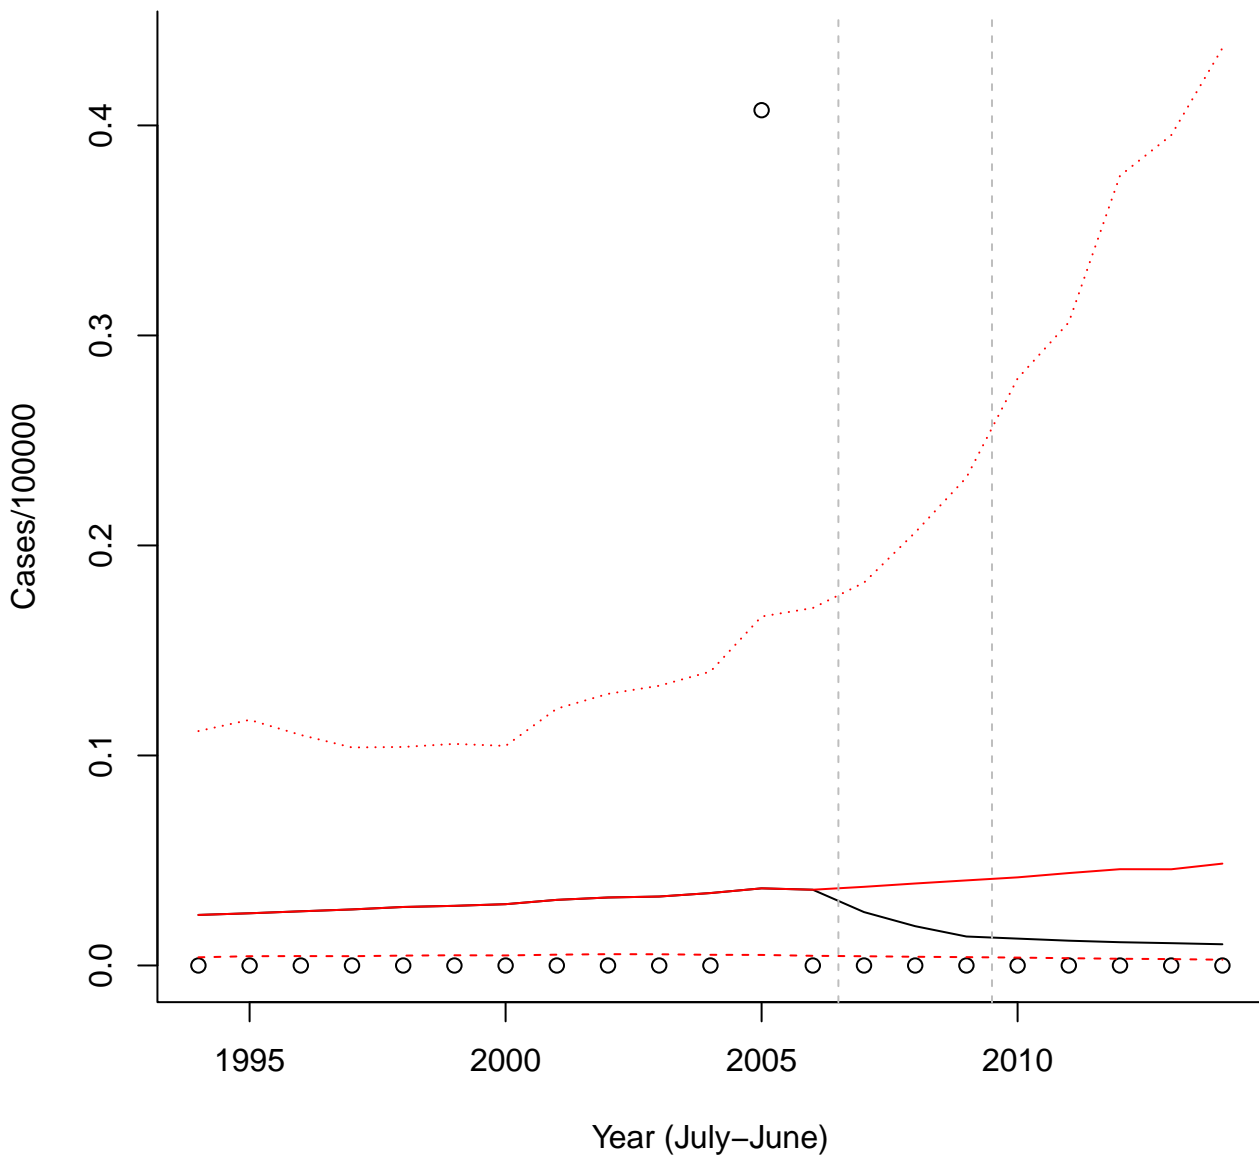

# 65+y With comorbidity Serotype 33C

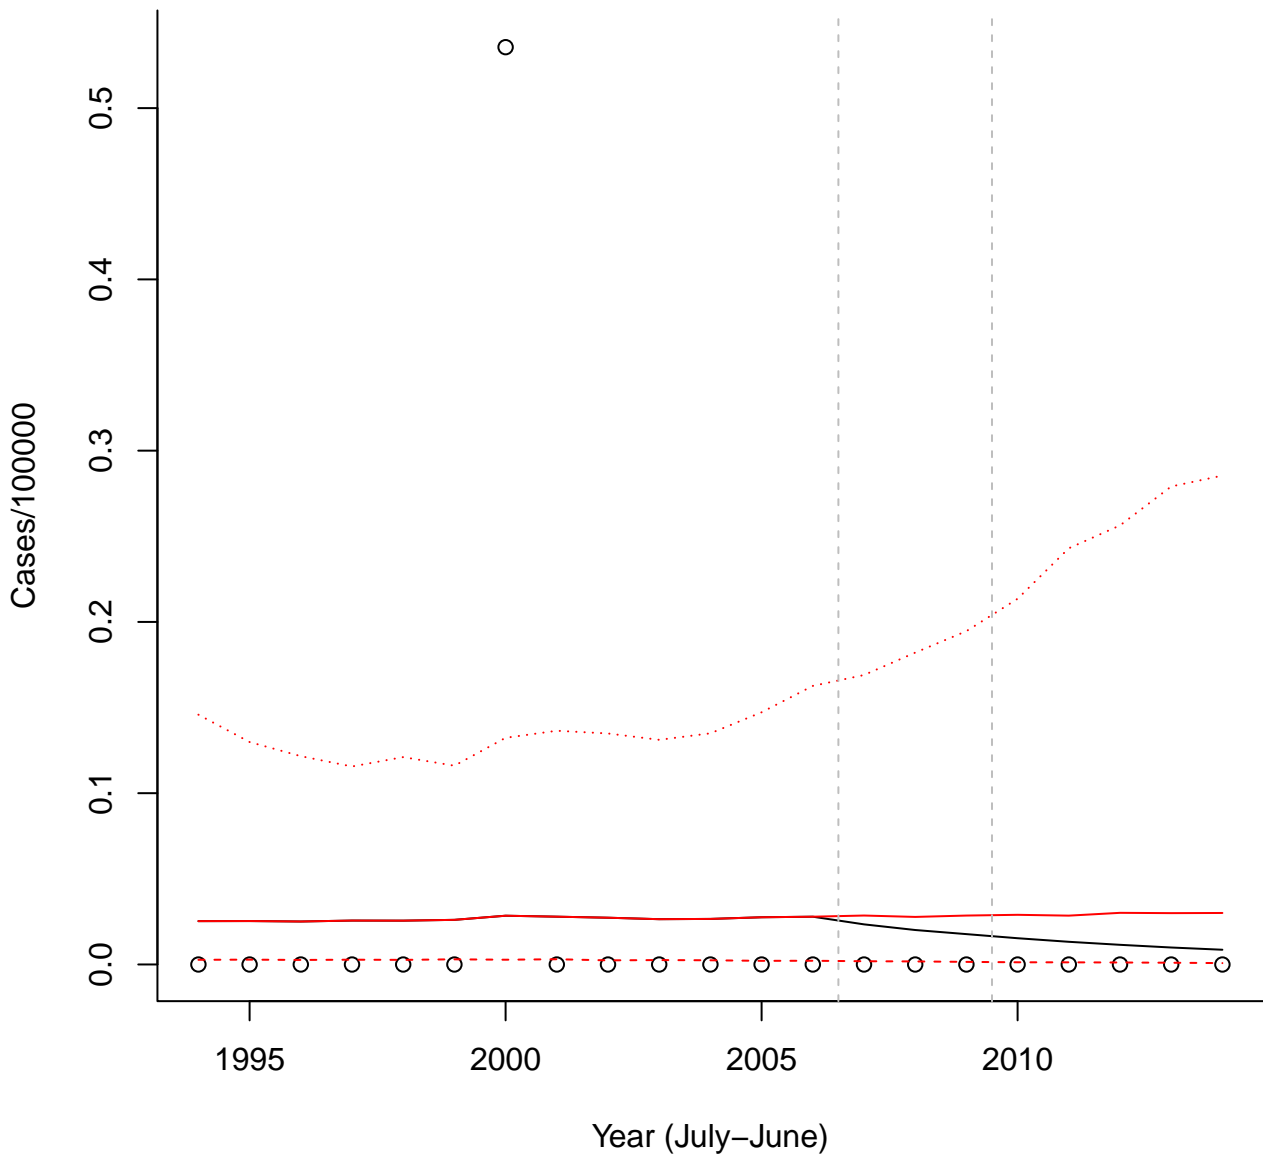



# 65+y With comorbidity Serotype 33F

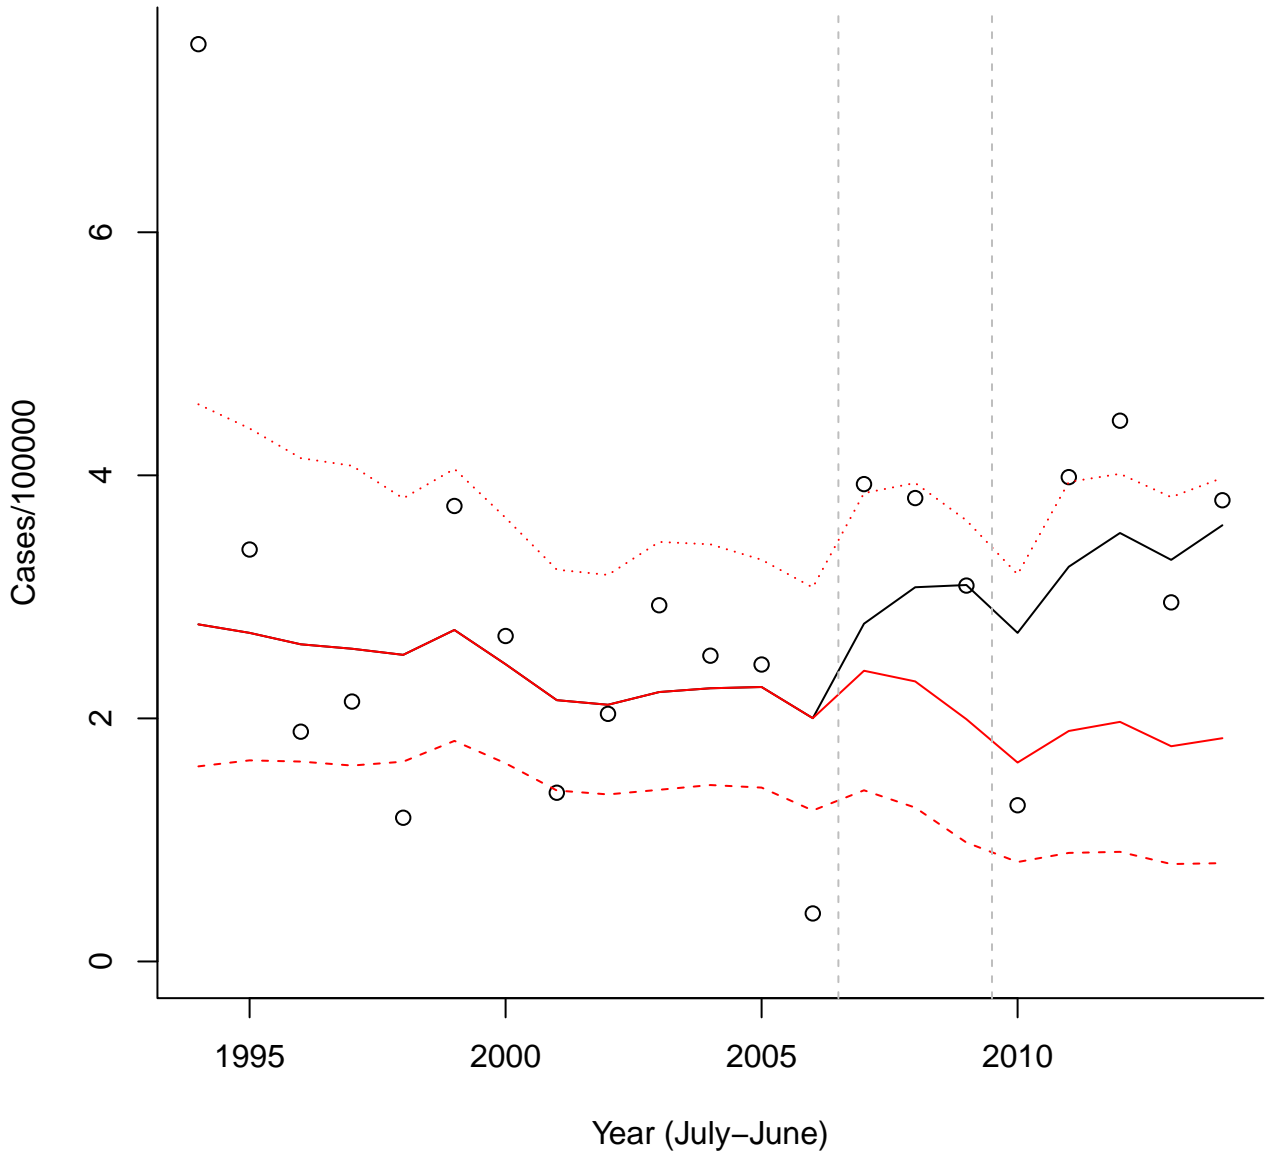

# 65+y With comorbidity Serotype 34

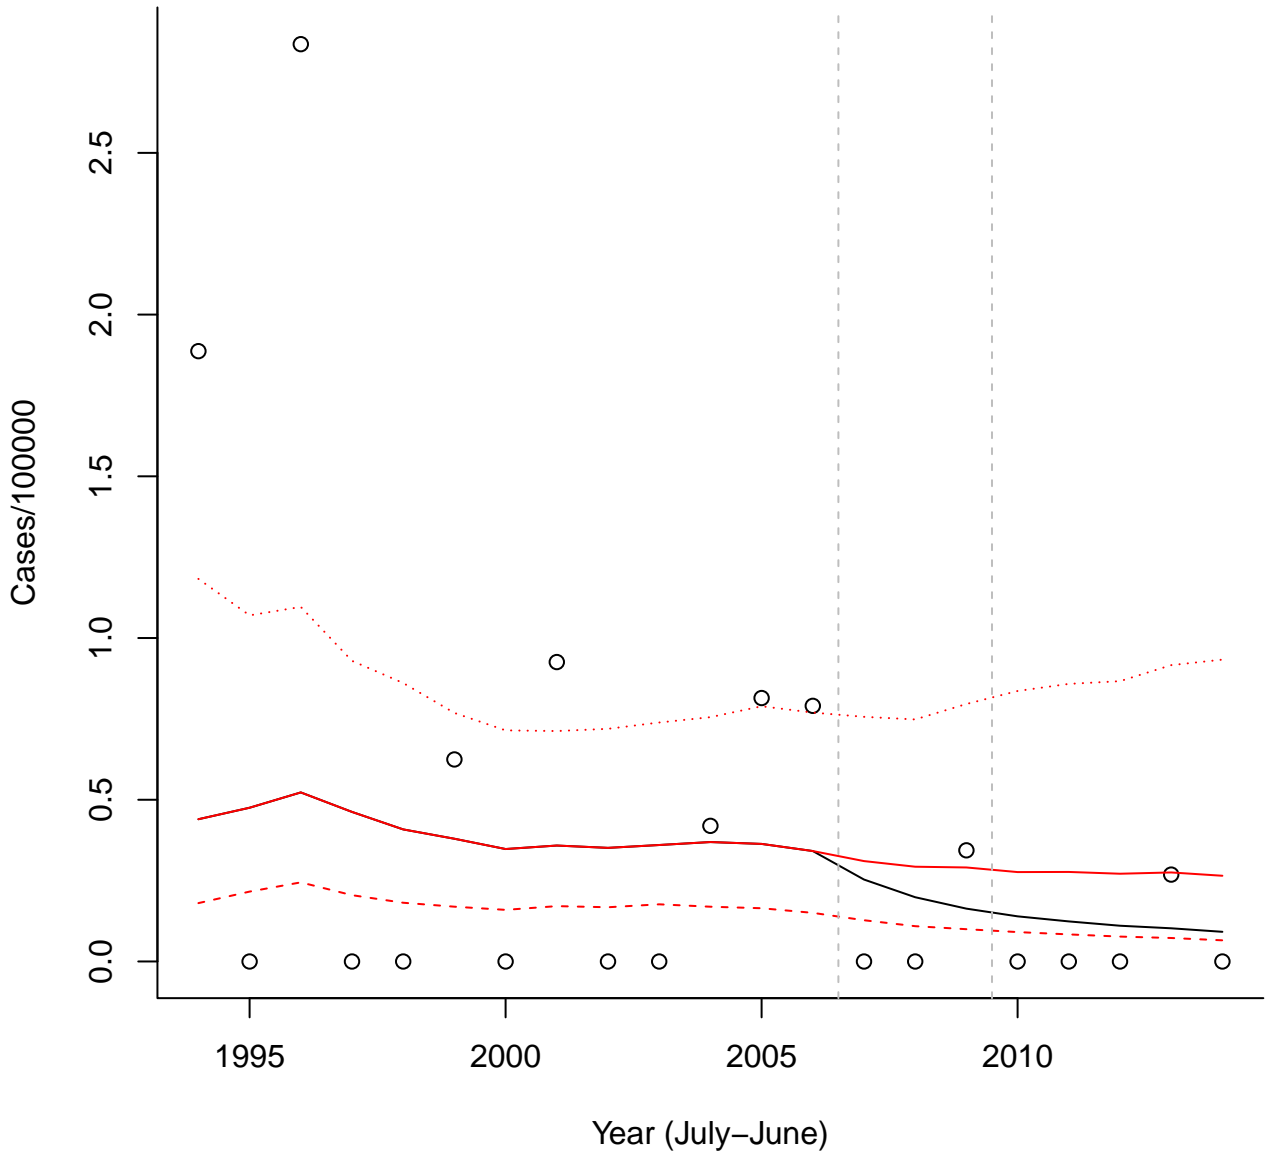

# 65+y With comorbidity Serotype 35B

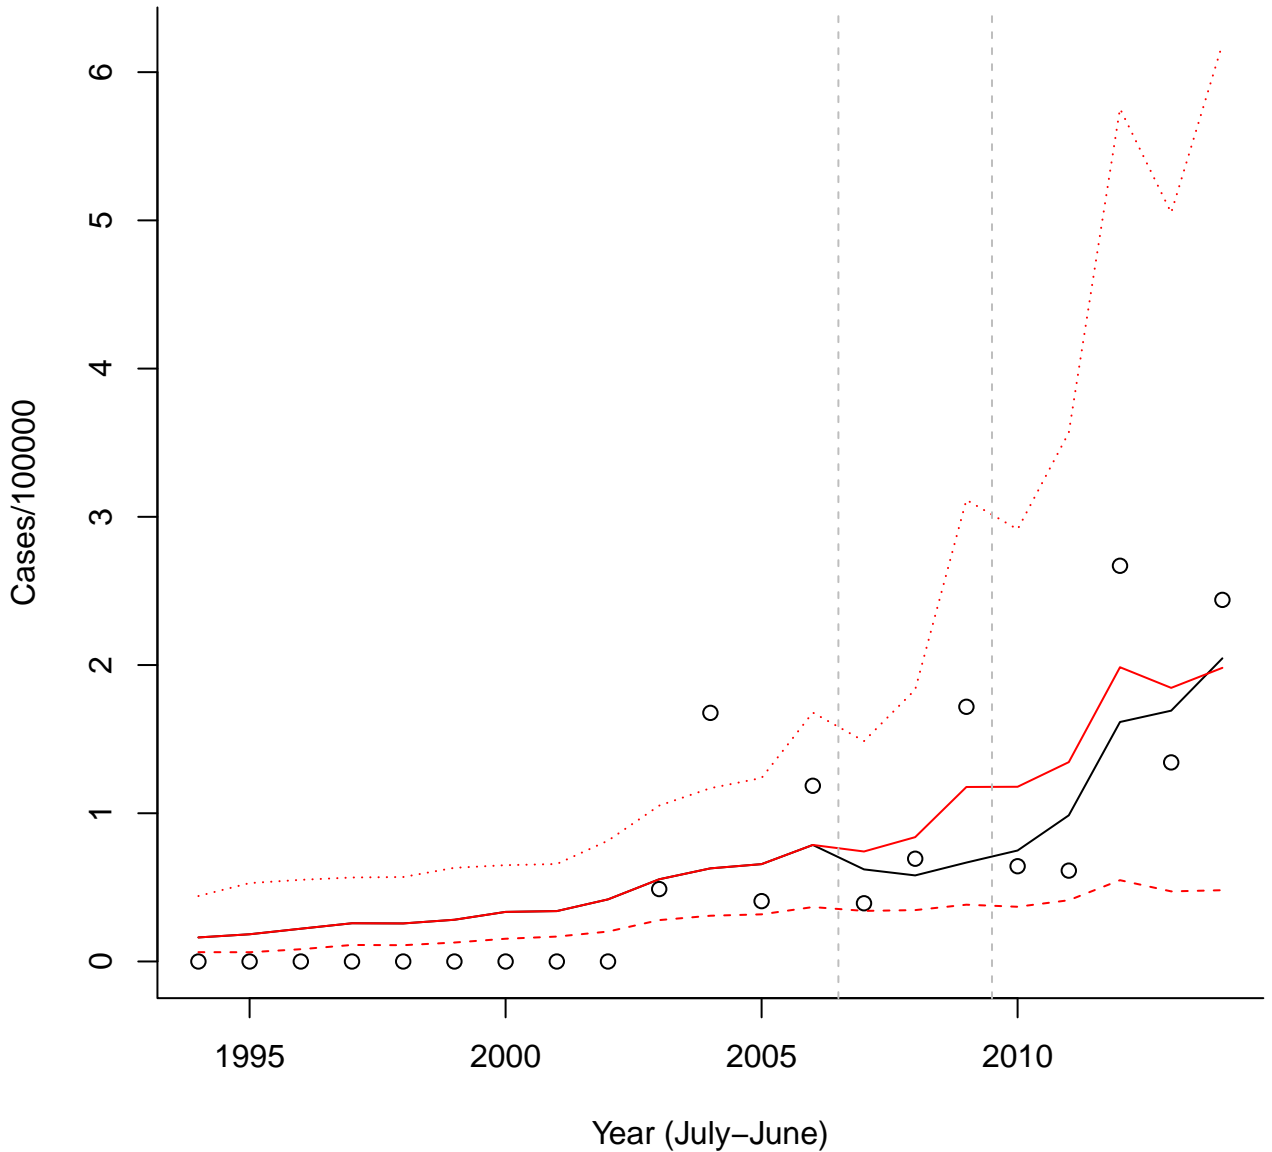

# 65+y With comorbidity Serotype 35C

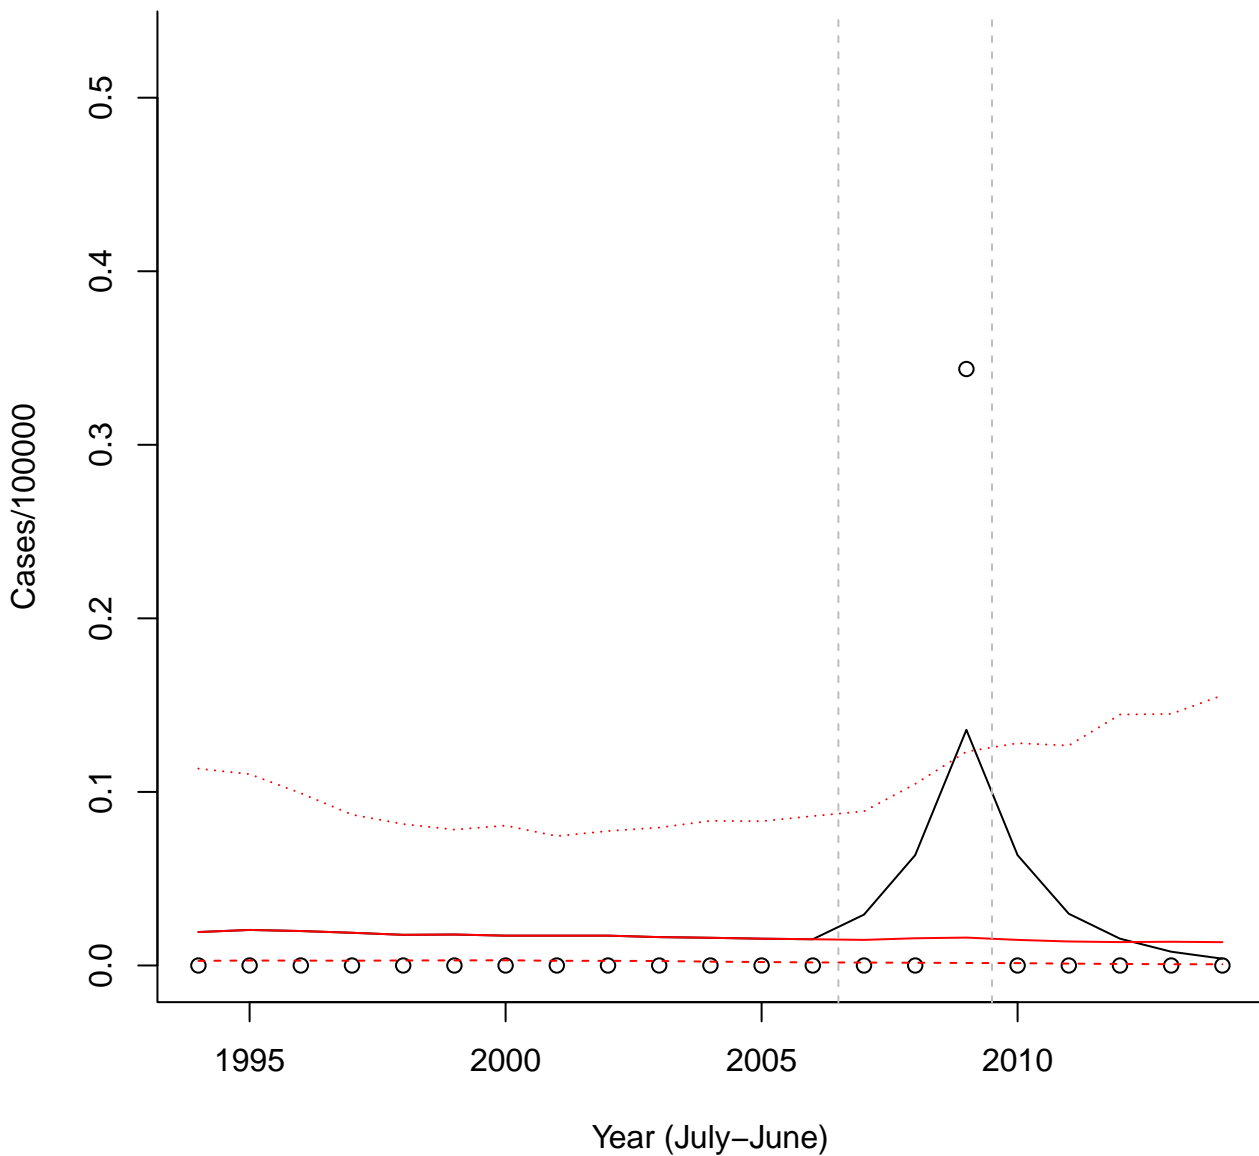

# 65+y With comorbidity Serotype 35F

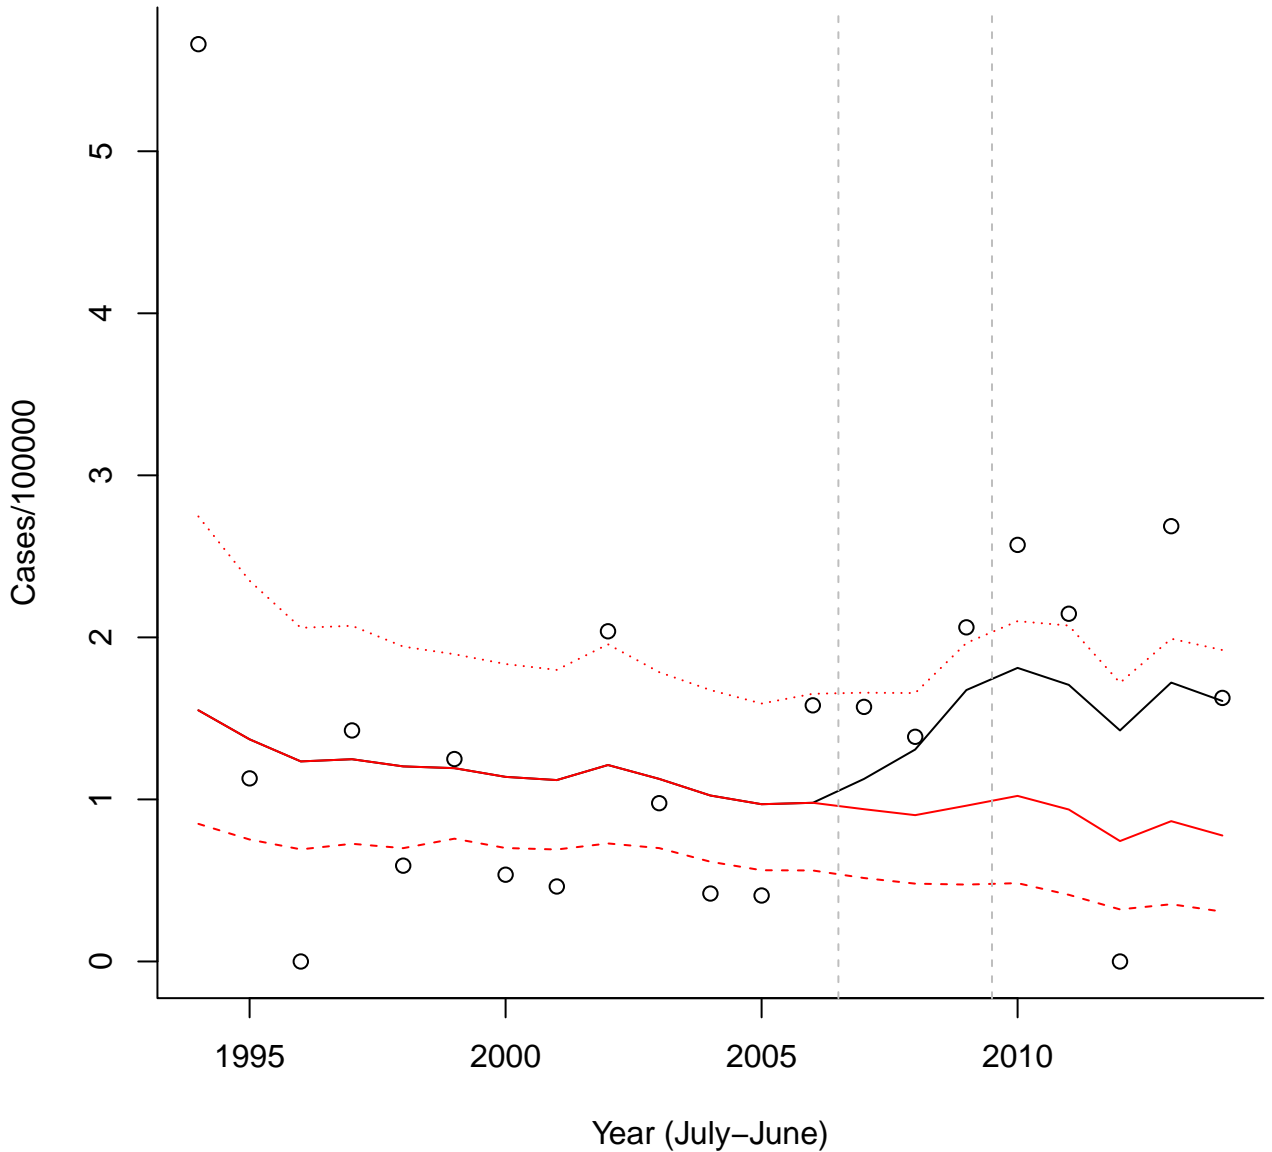

# 65+y With comorbidity Serotype 37

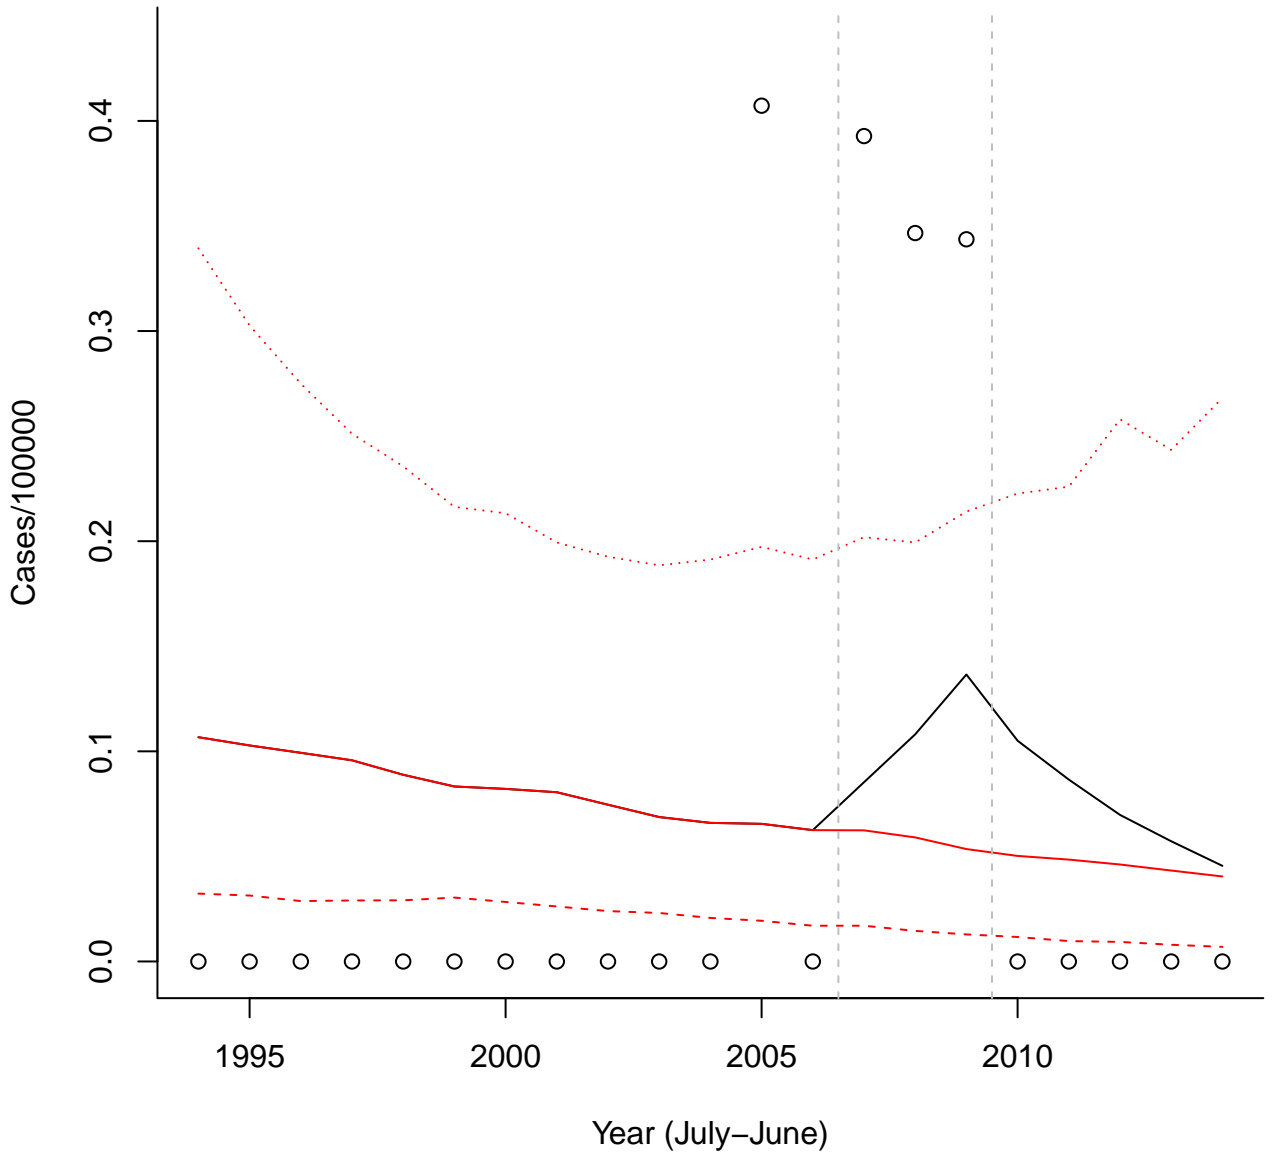

# 65+y With comorbidity Serotype 38

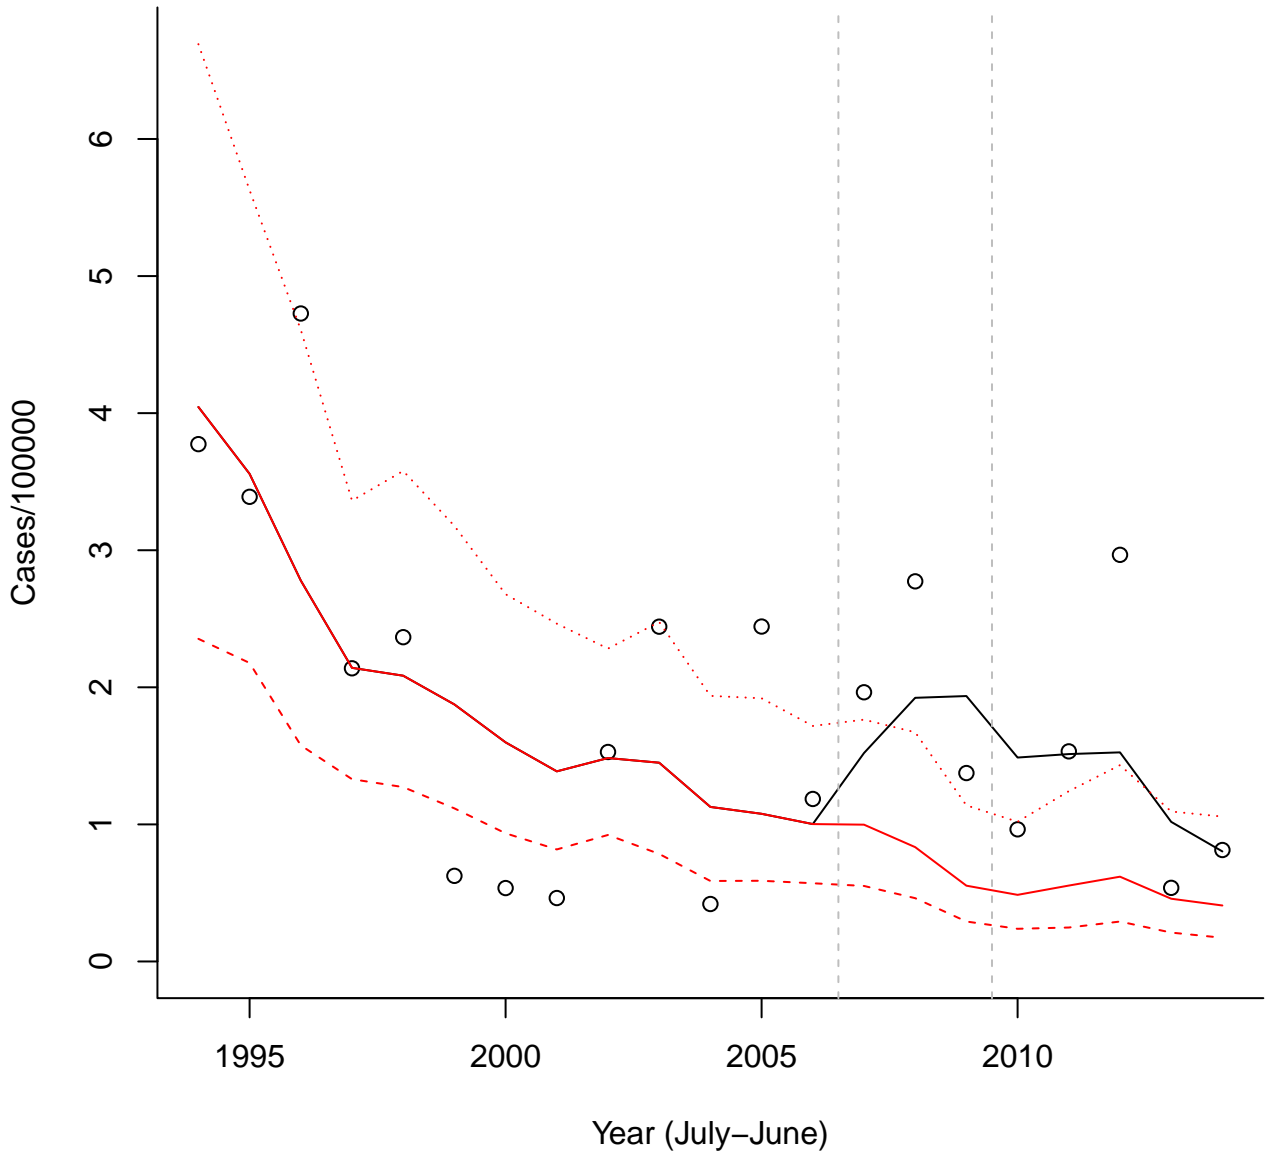

# 65+y With comorbidity Serotype 4

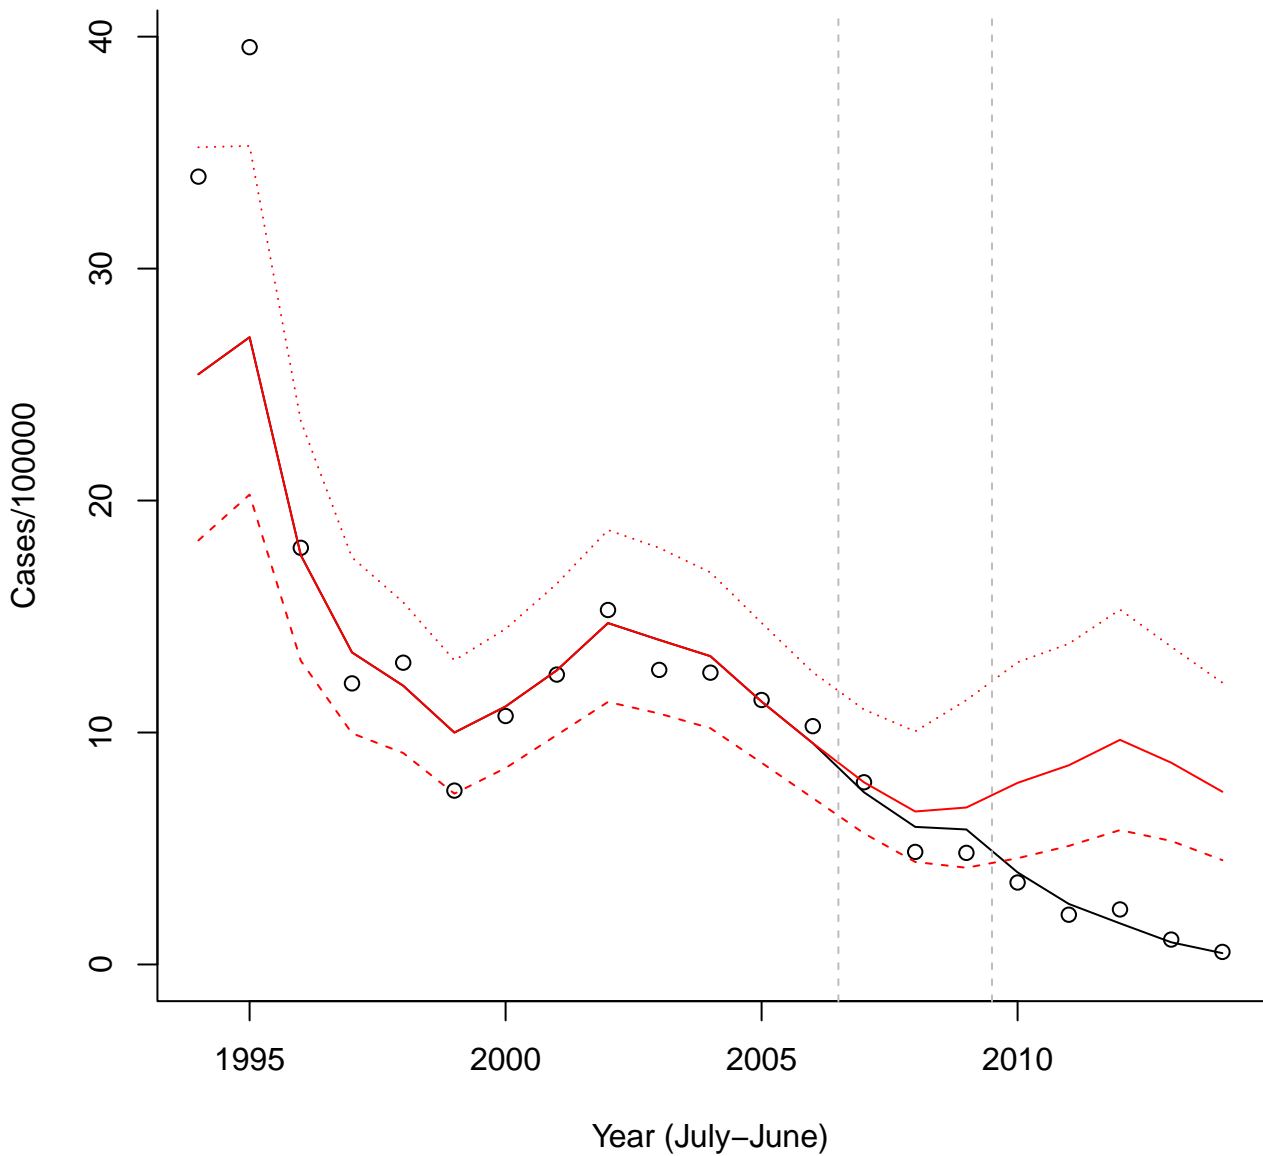



# 65+y With comorbidity Serotype 45

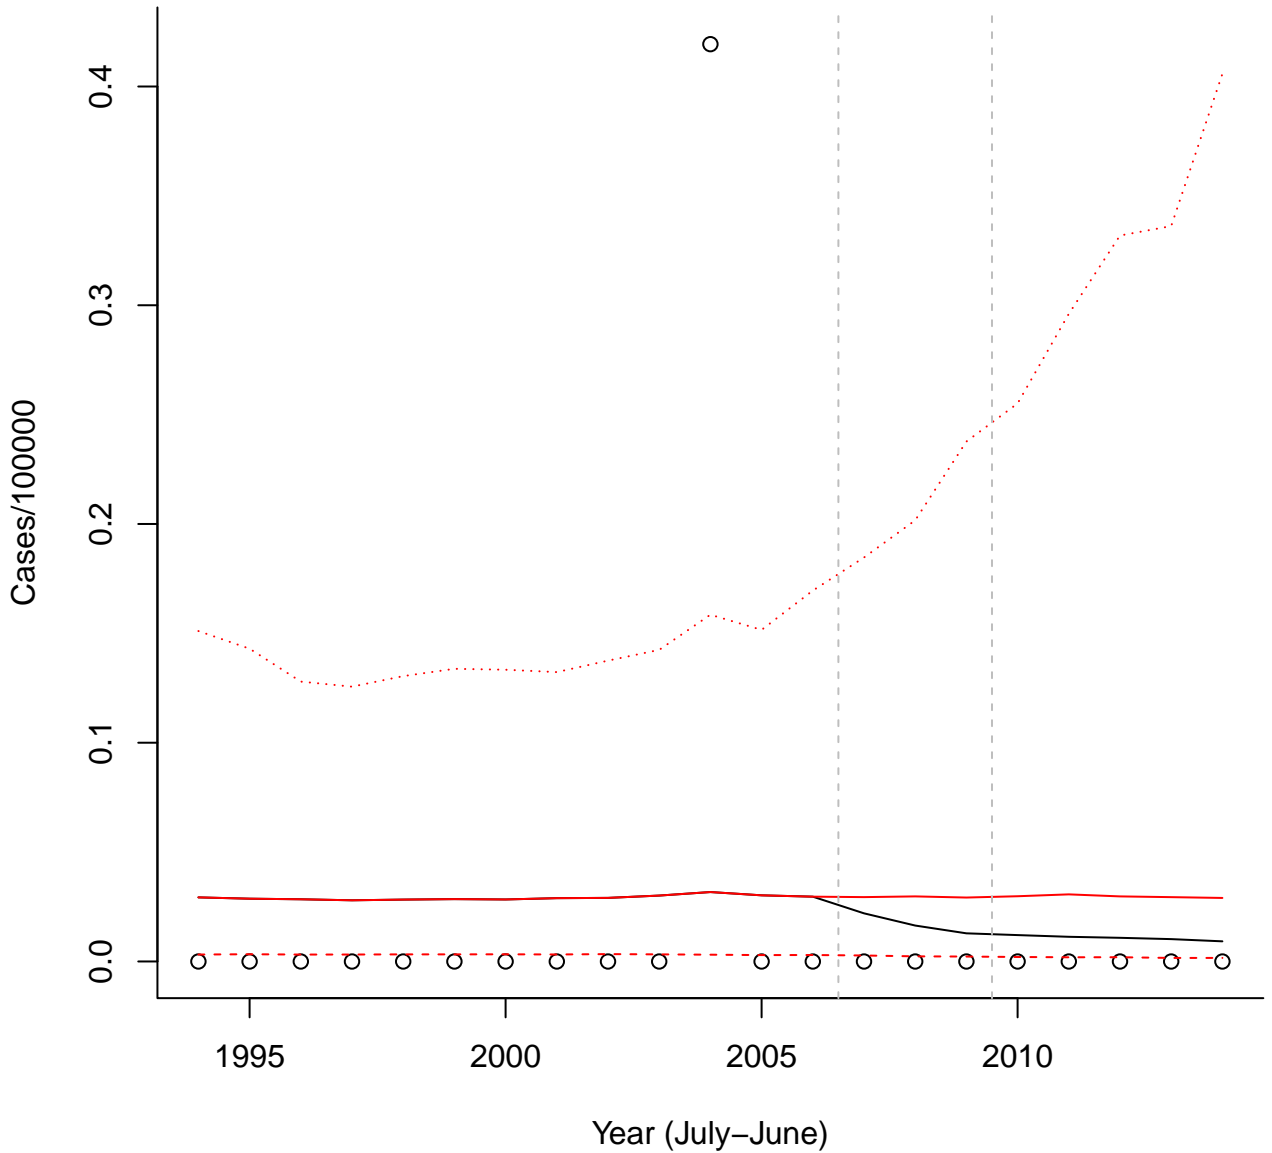

# 65+y With comorbidity Serotype 48

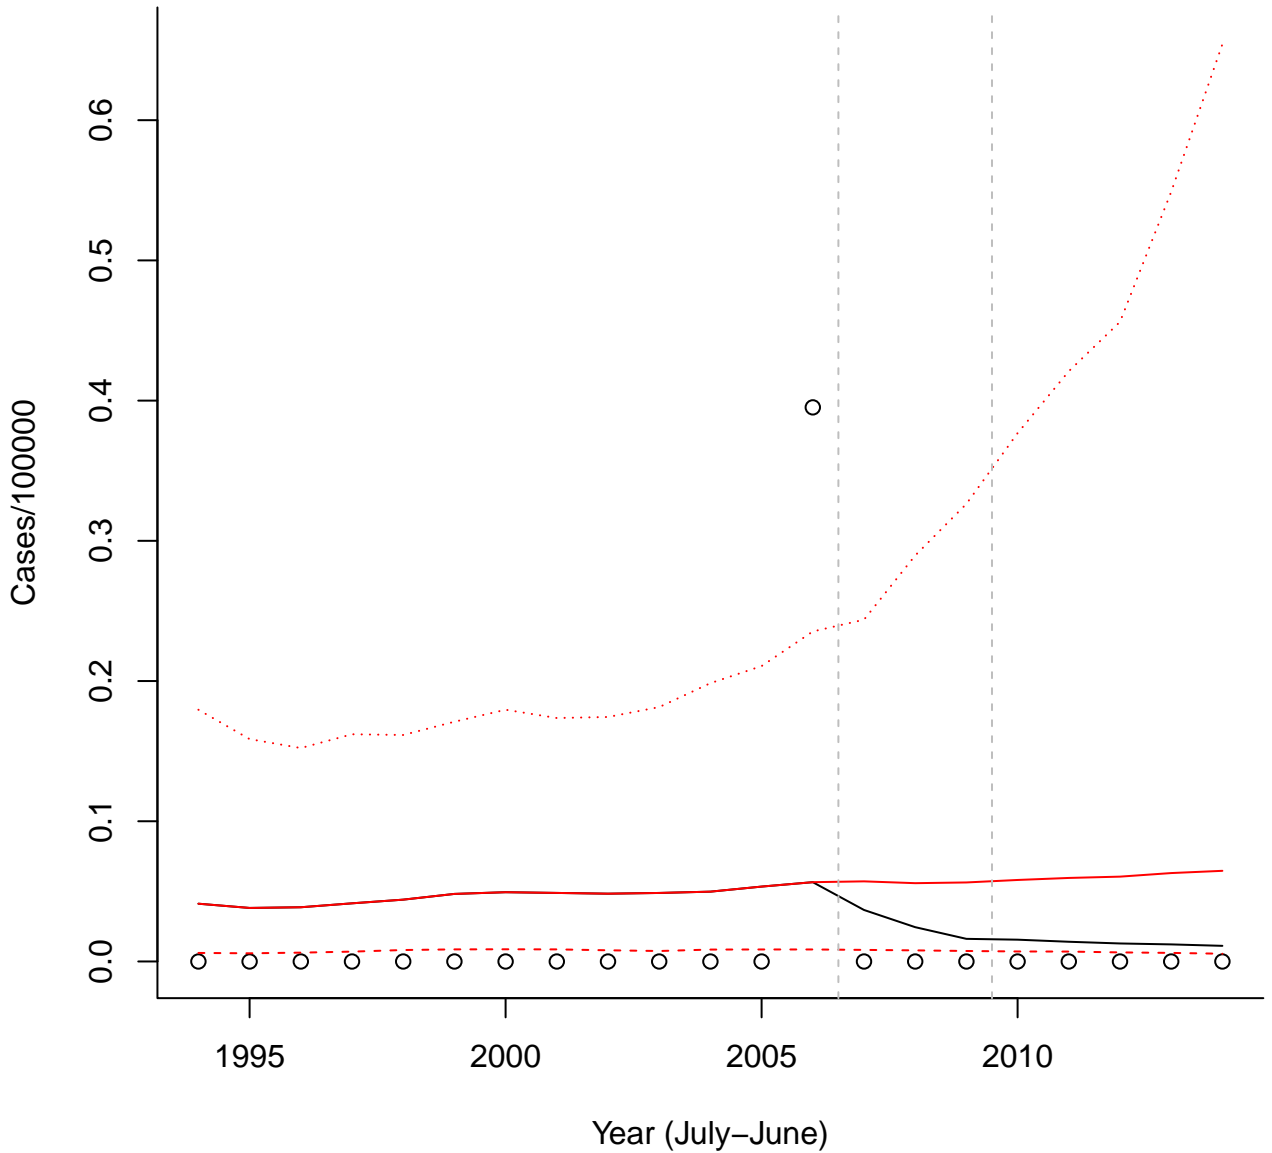

# 65+y With comorbidity Serotype 5

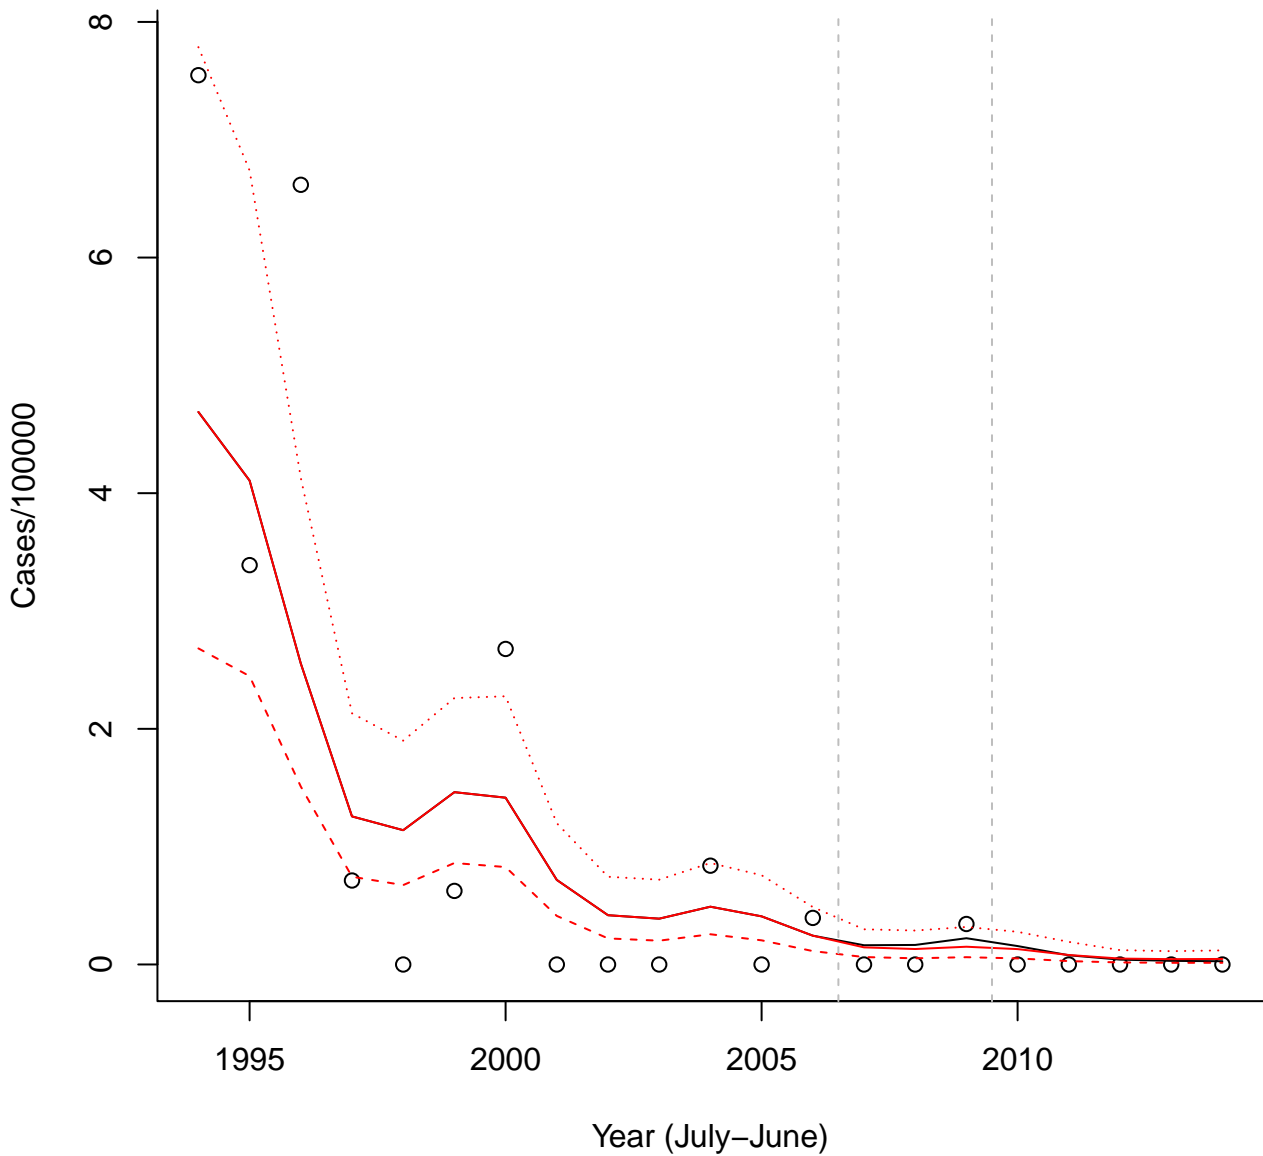

# 65+y With comorbidity Serotype 6A

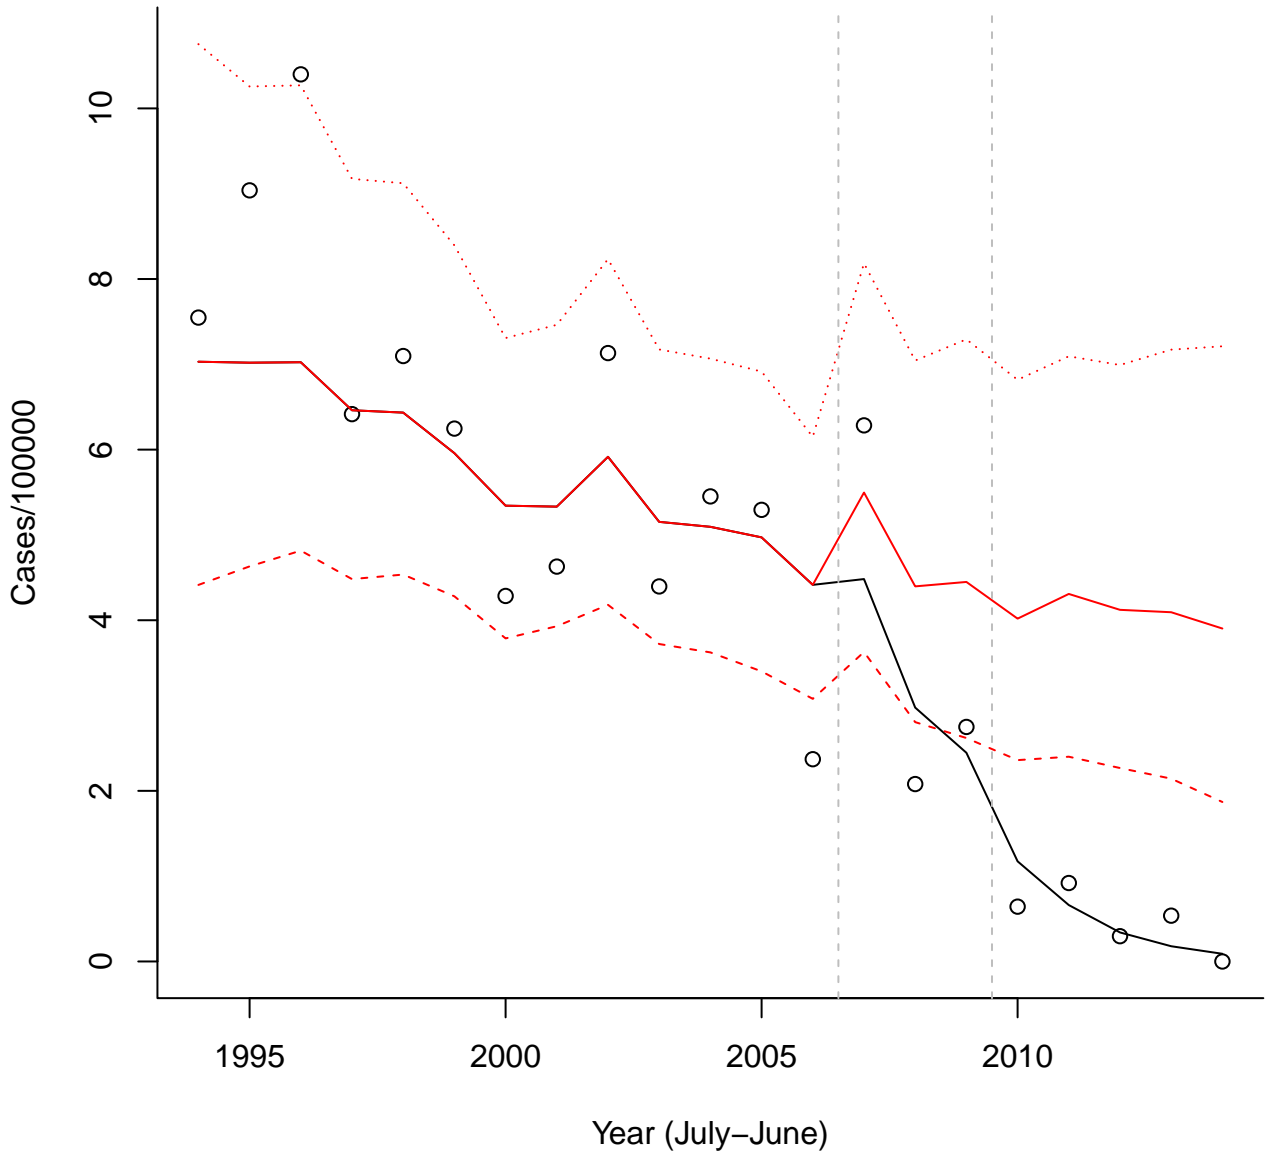

# 65+y With comorbidity Serotype 6B

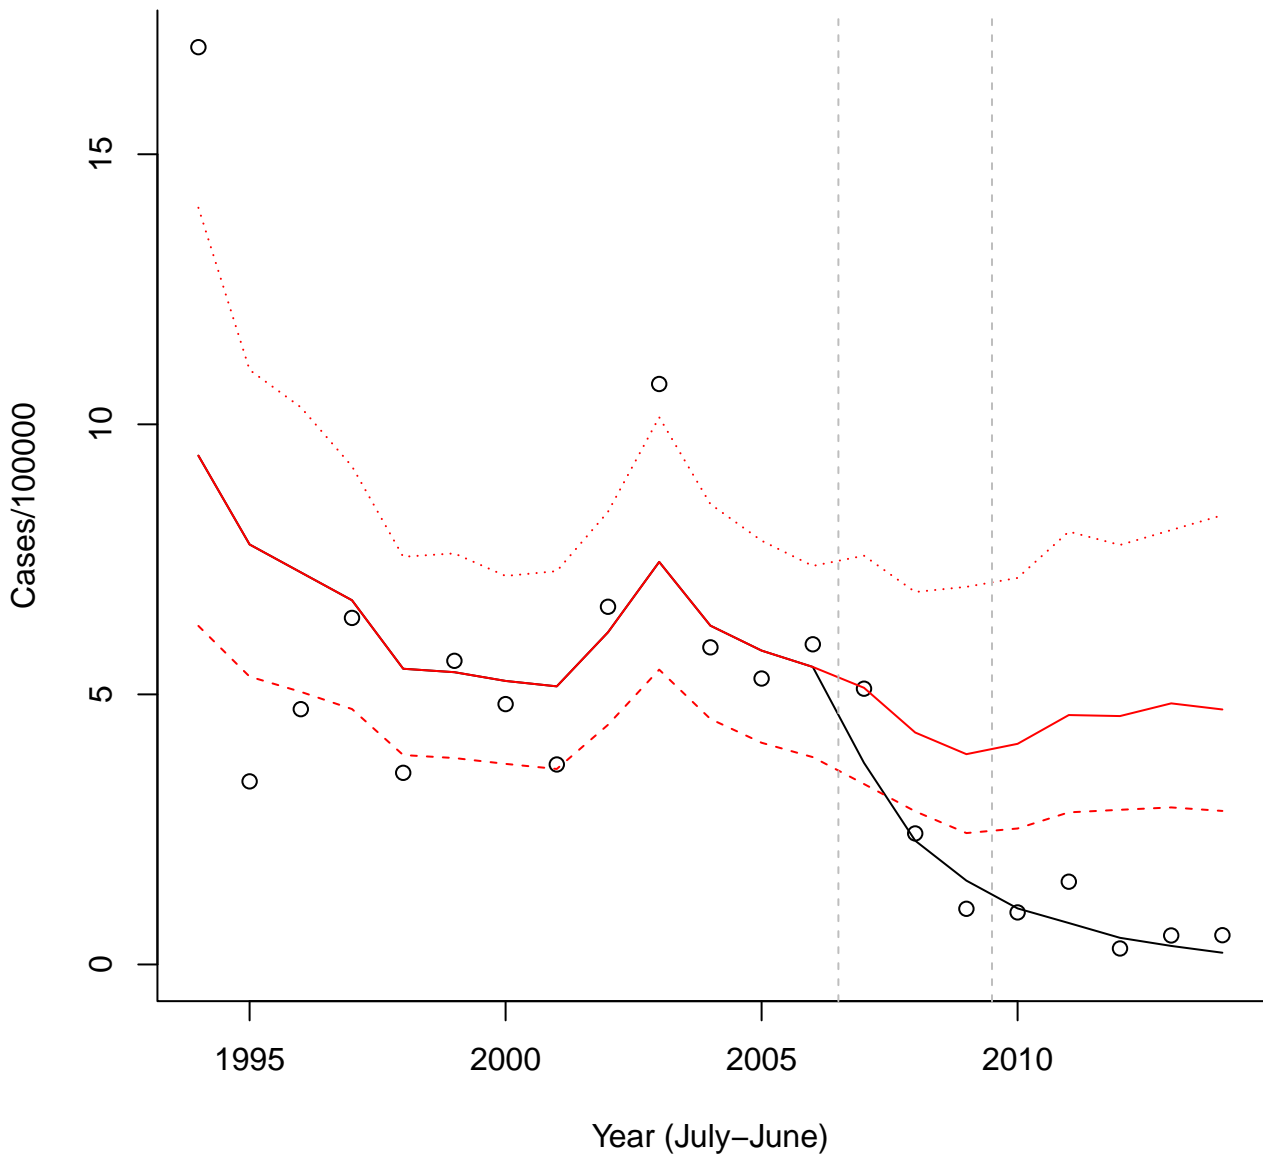

# 65+y With comorbidity Serotype 6C

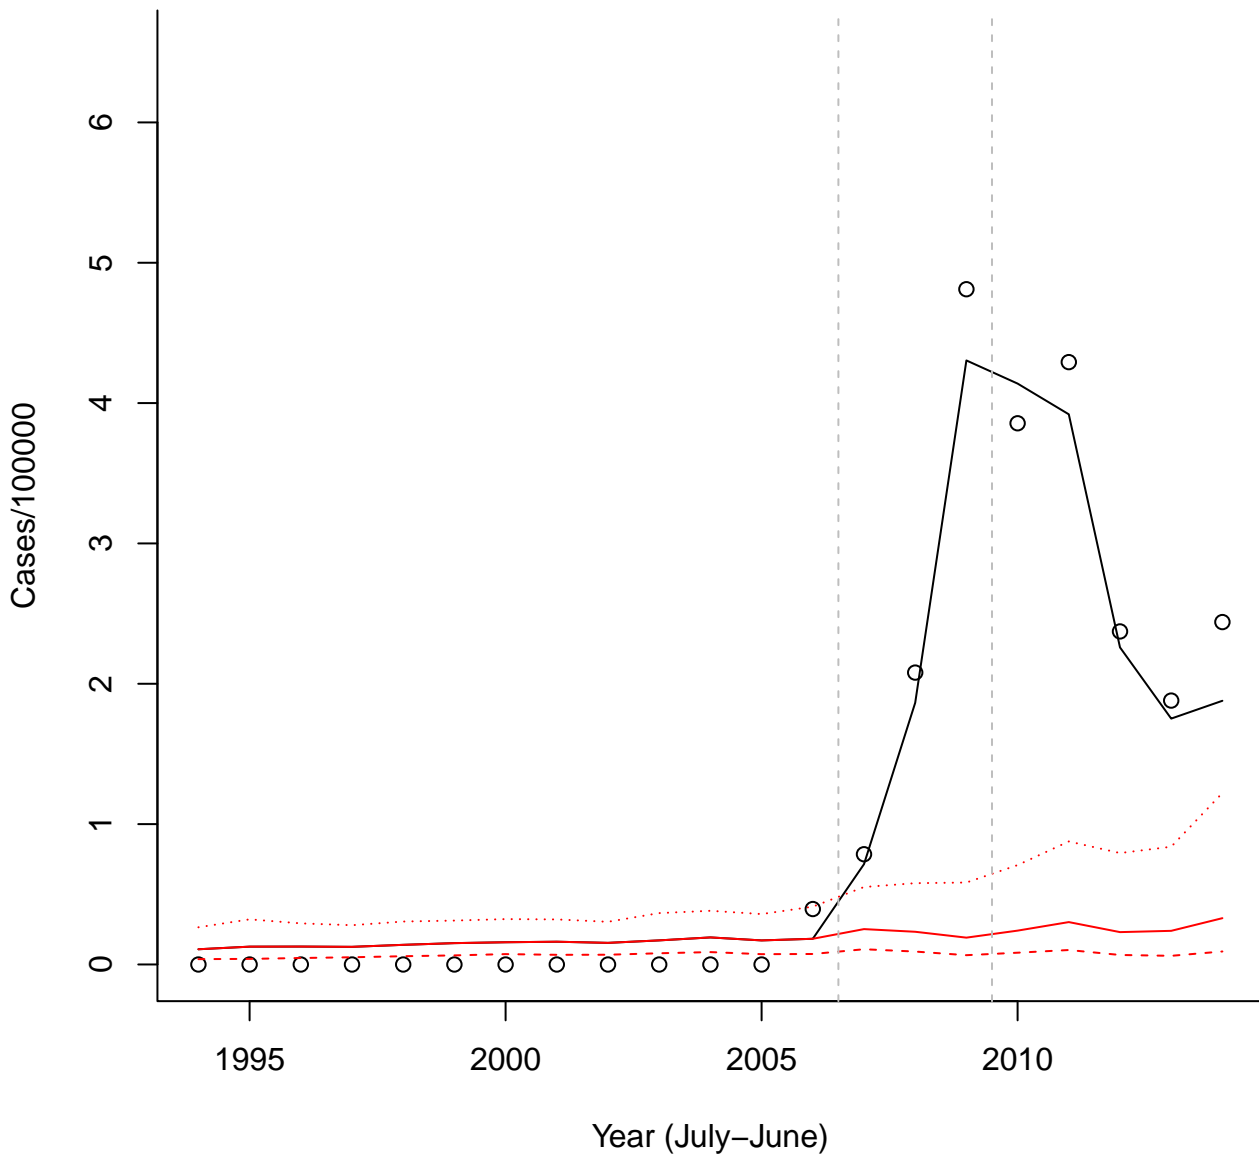

# 65+y With comorbidity Serotype 7C

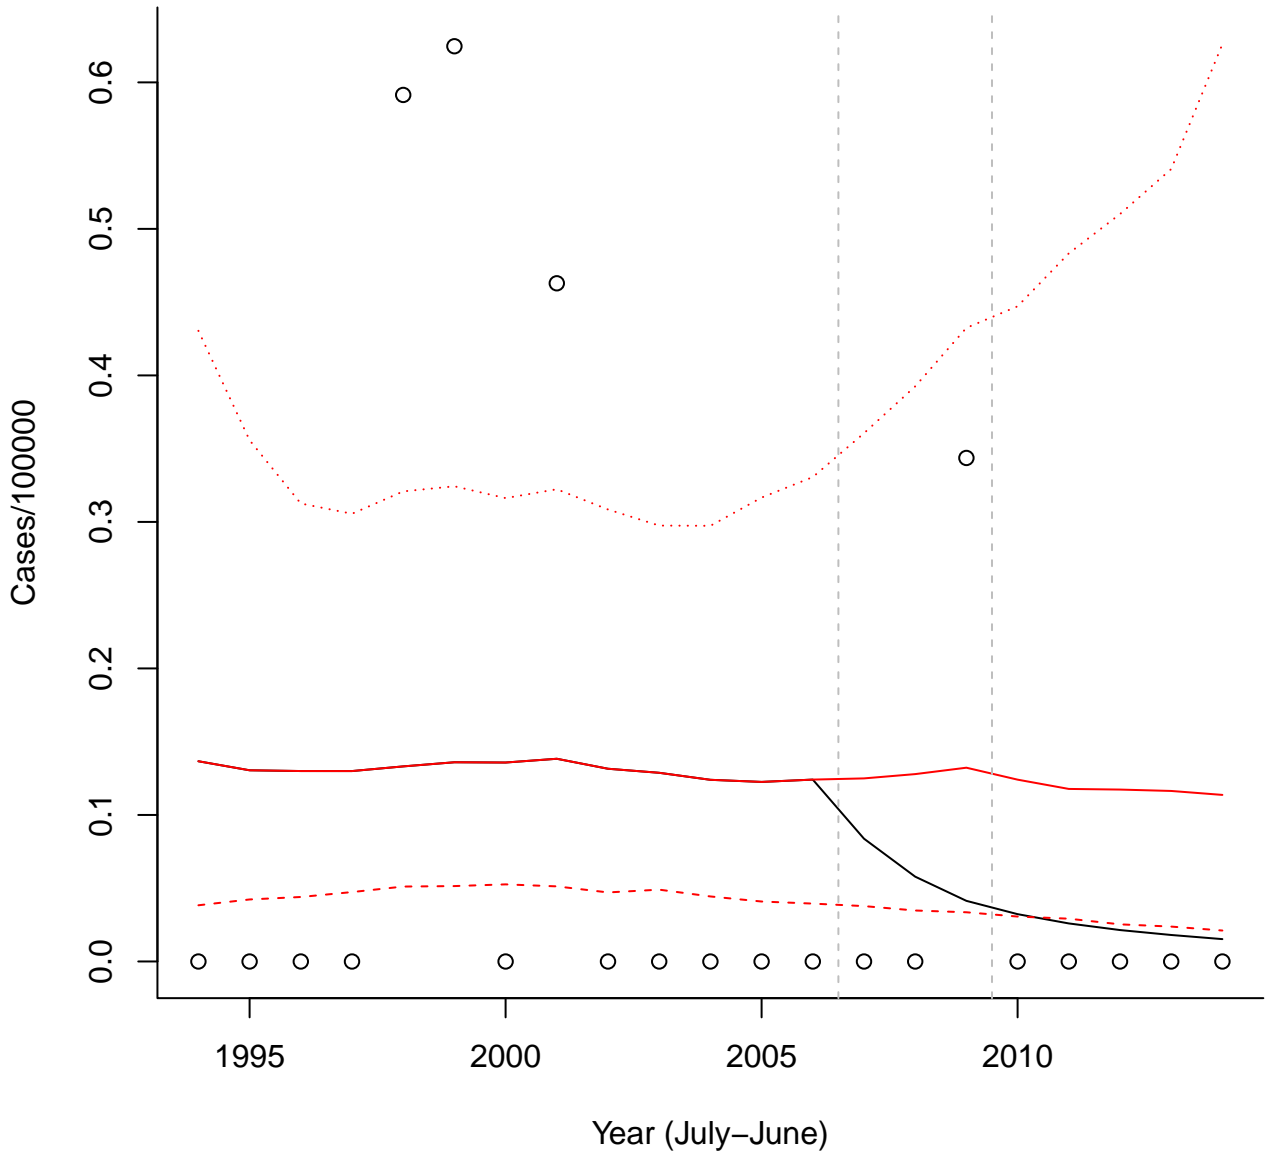

# 65+y With comorbidity Serotype 7F

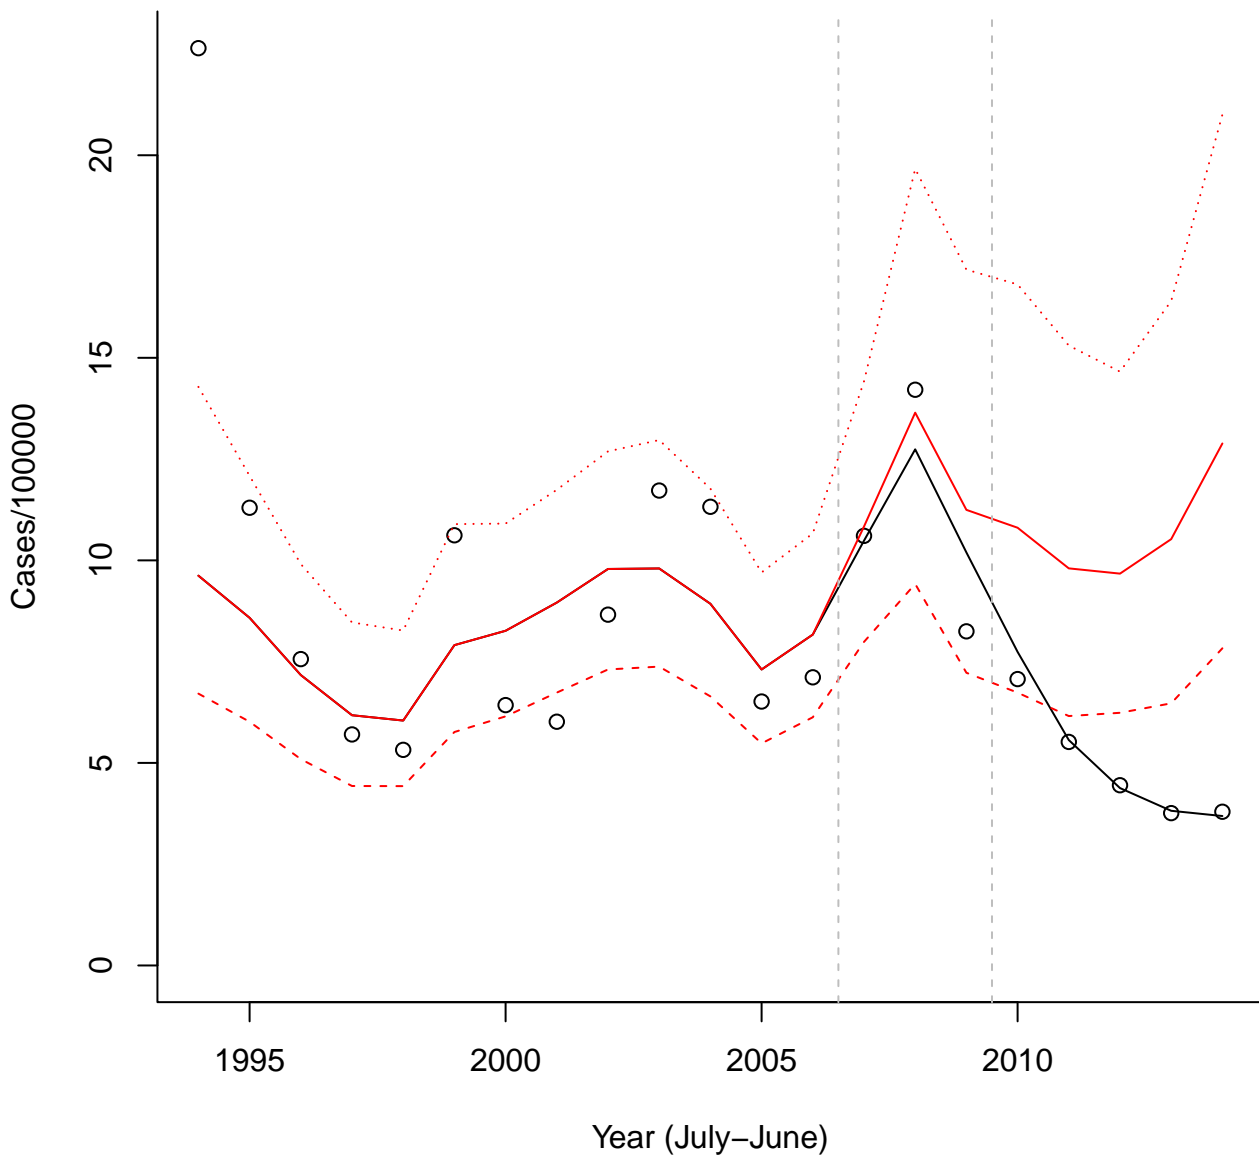



# 65+y With comorbidity Serotype 8

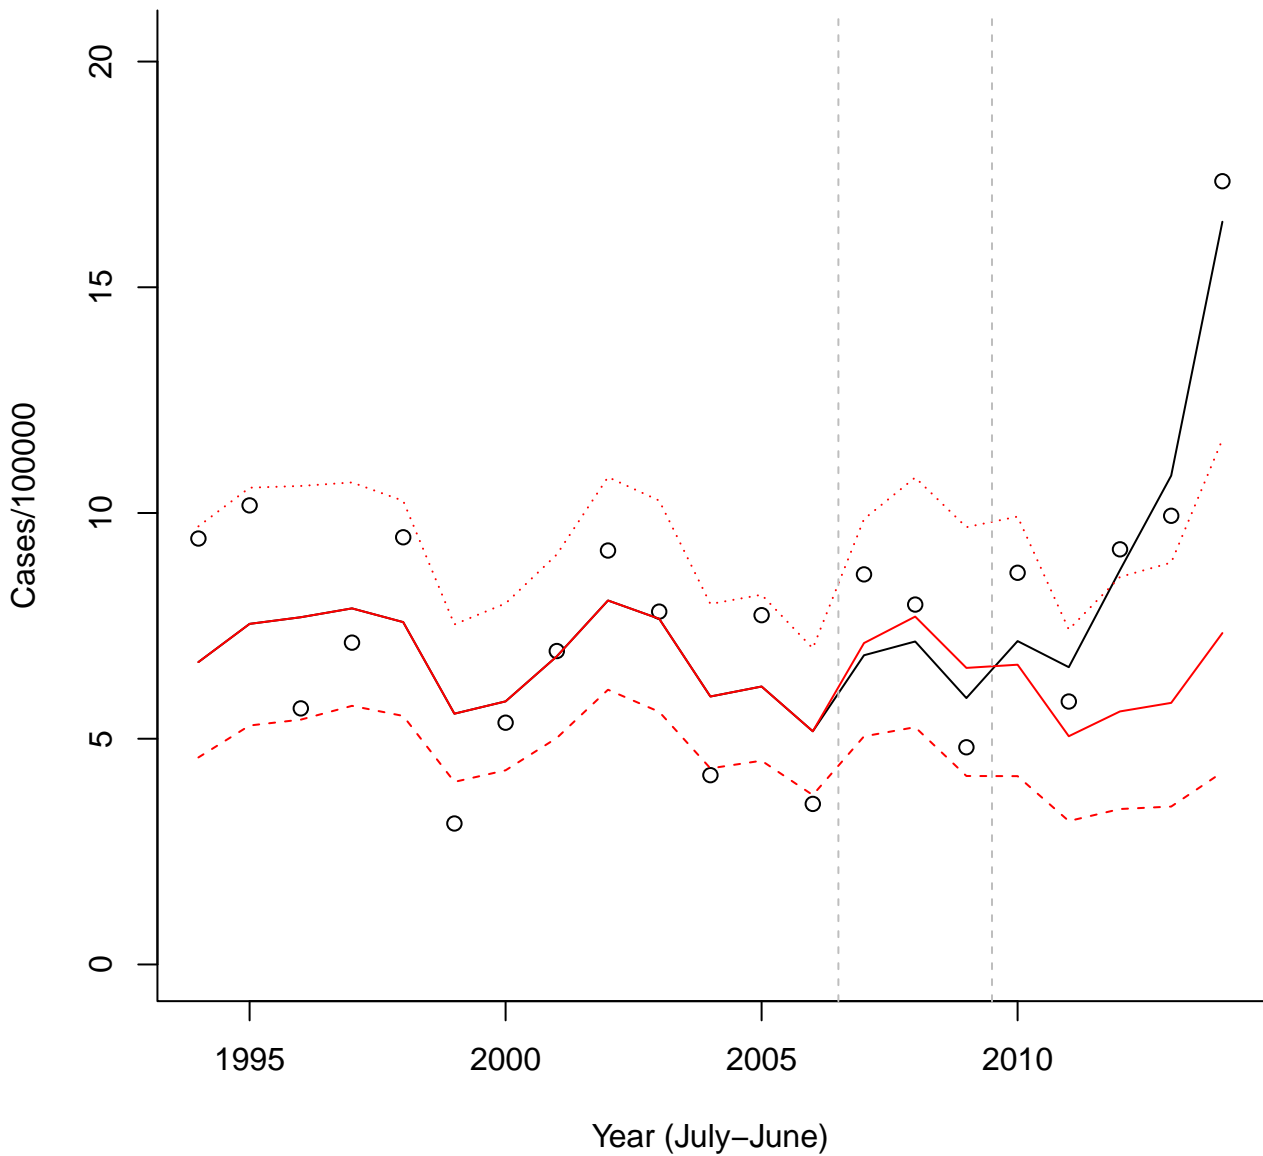

# 65+y With comorbidity Serotype 9A

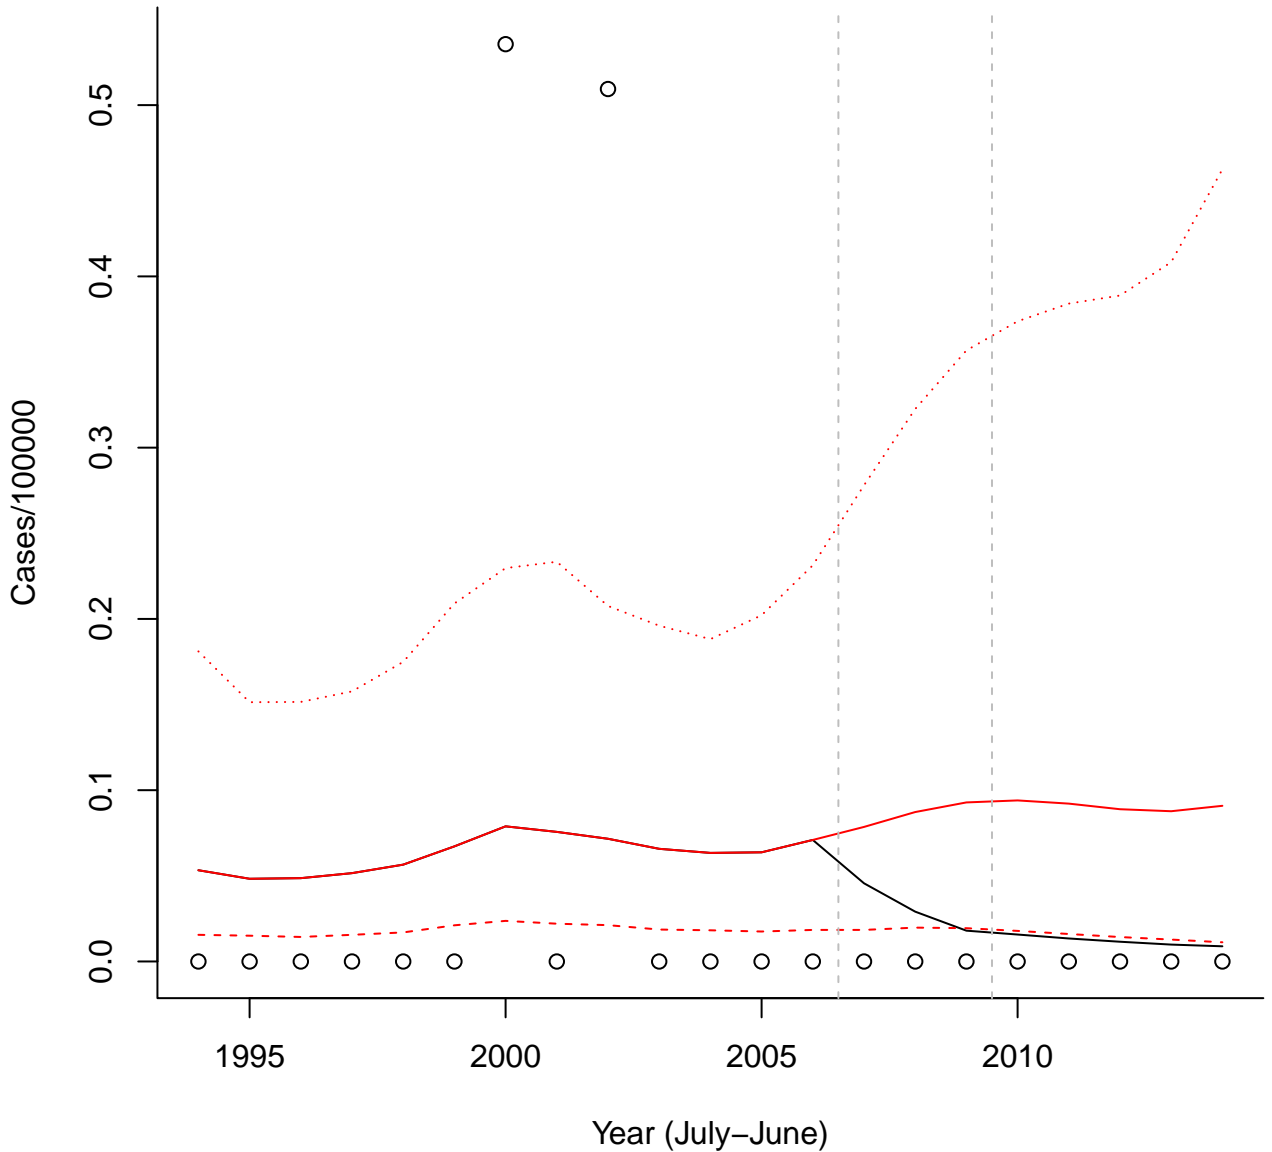

# 65+y With comorbidity Serotype 9N

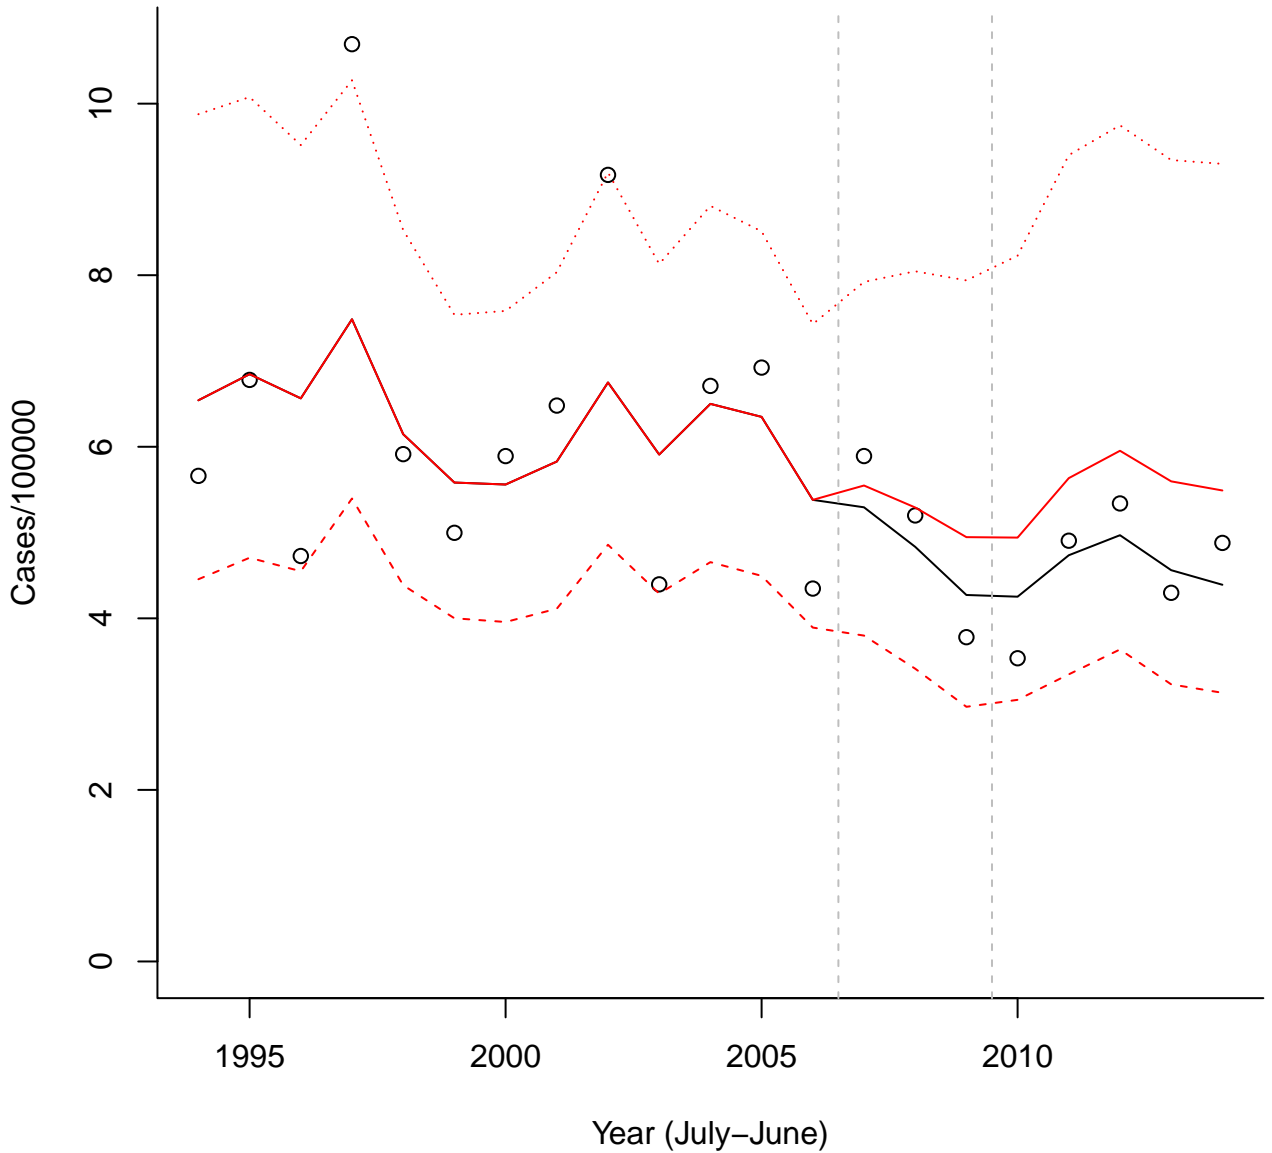

# 65+y With comorbidity Serotype 9V

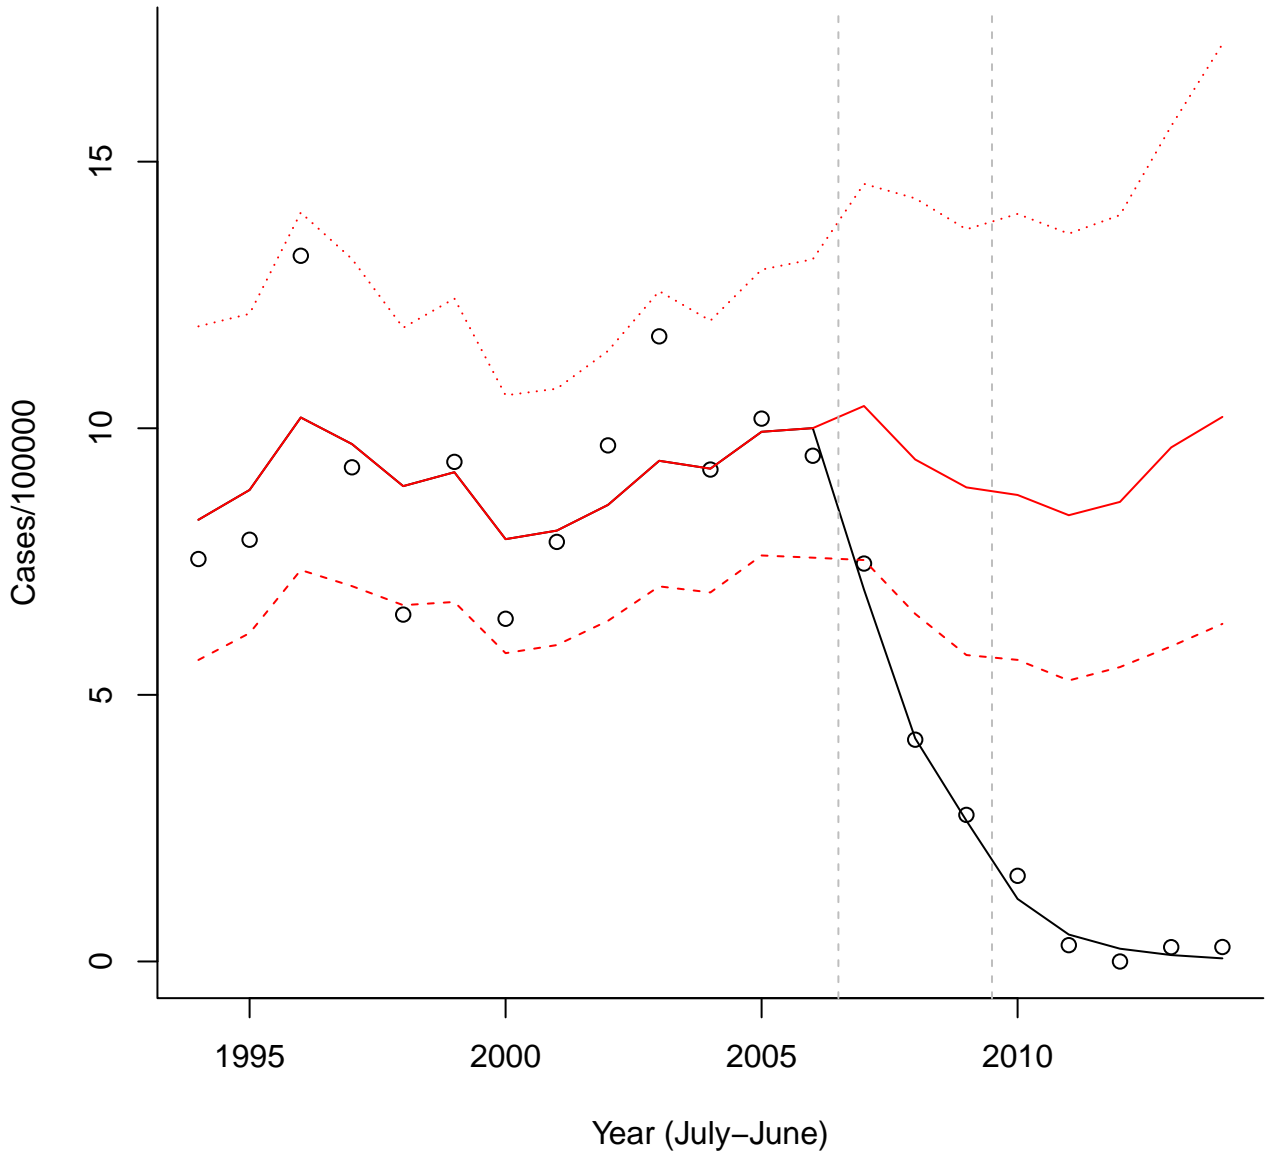

# 65+y With comorbidity Serotype NT

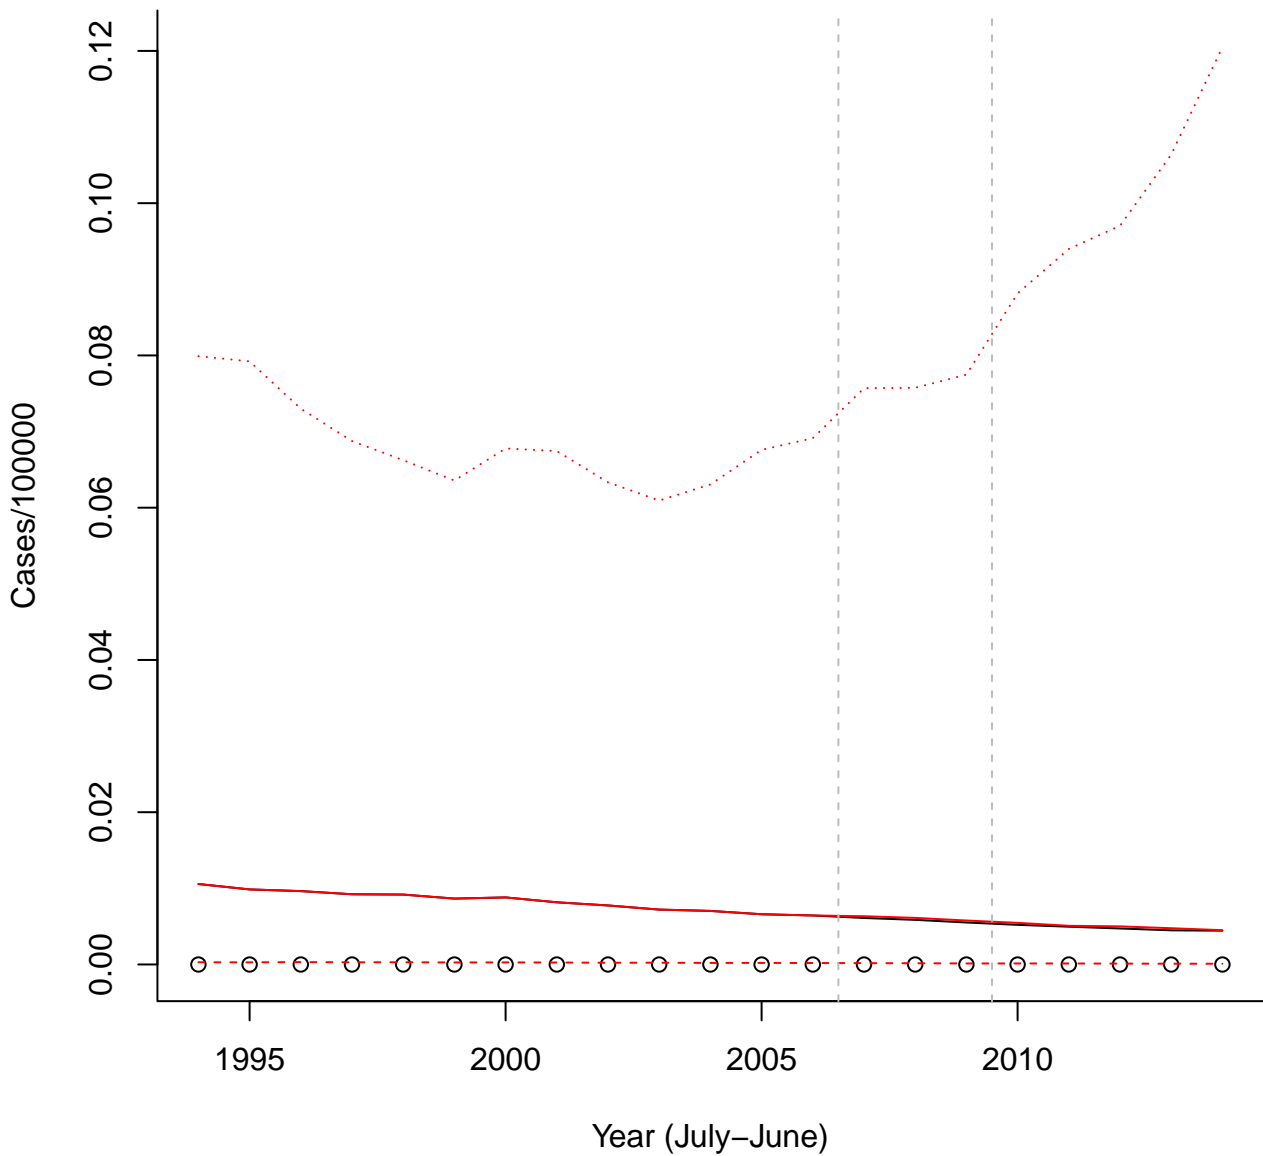

# 65+y With comorbidity Serotype OT1

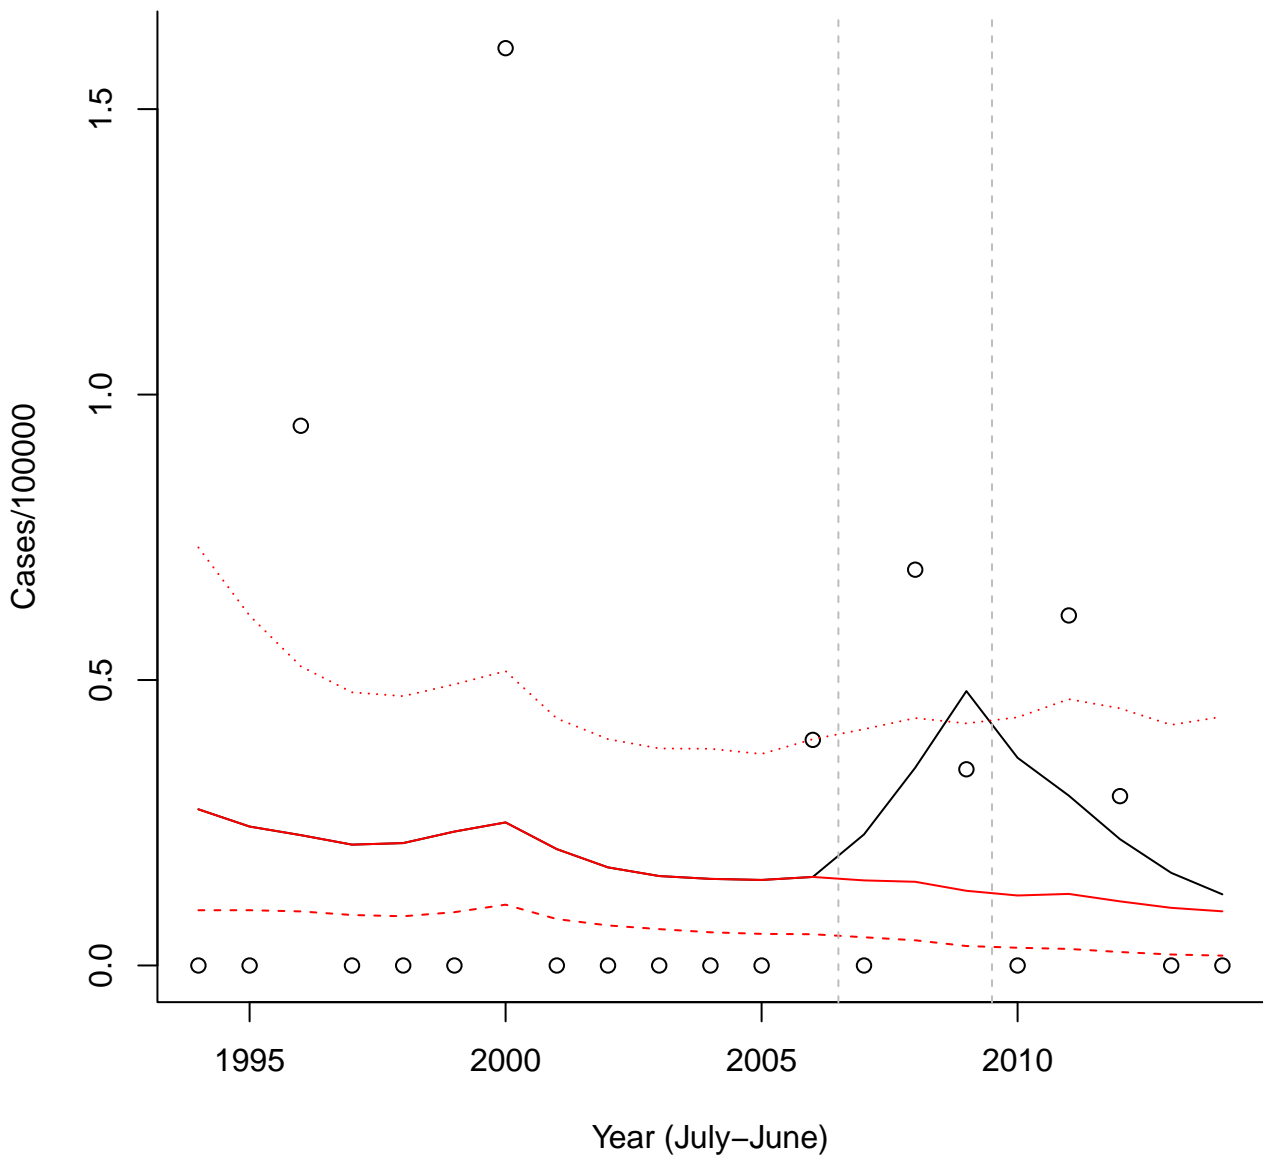

Supplement: ciy875_suppl_supplementary_figure_s7.pdf [file ciy875_suppl_supplementary_figure_s7.pdf]
