# Supplementary material
Source: PubMed Central journal article supplement (PMC6579958)

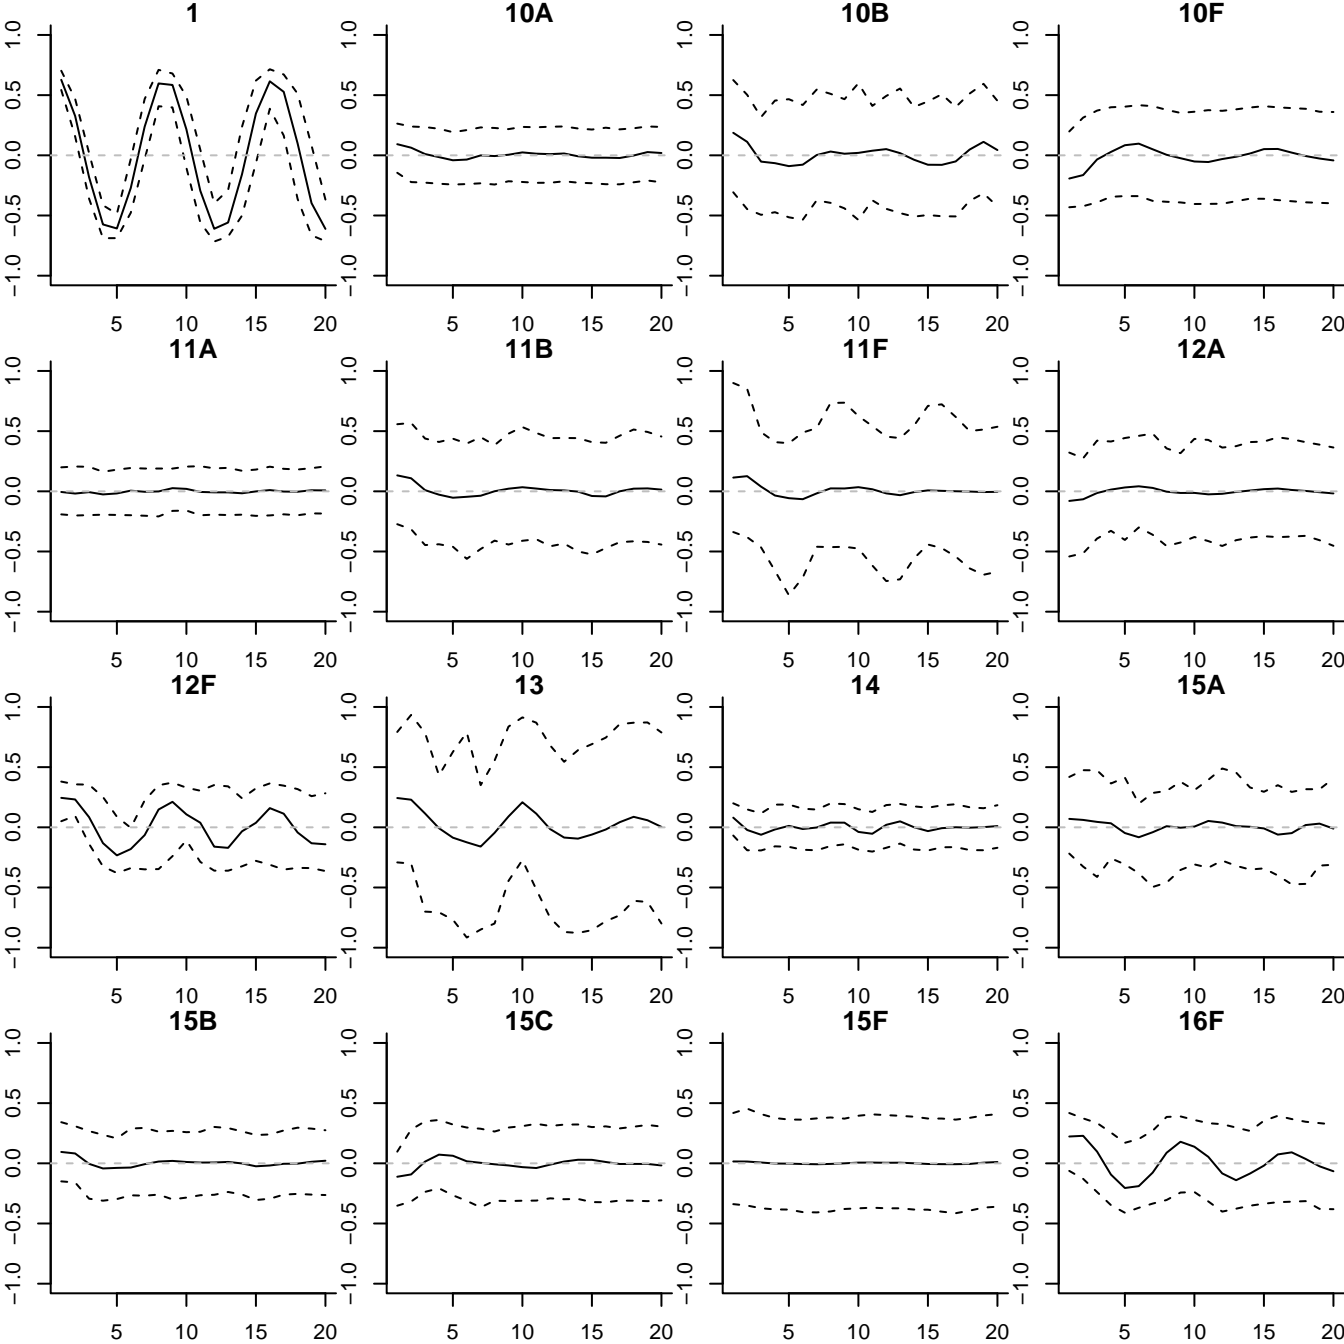

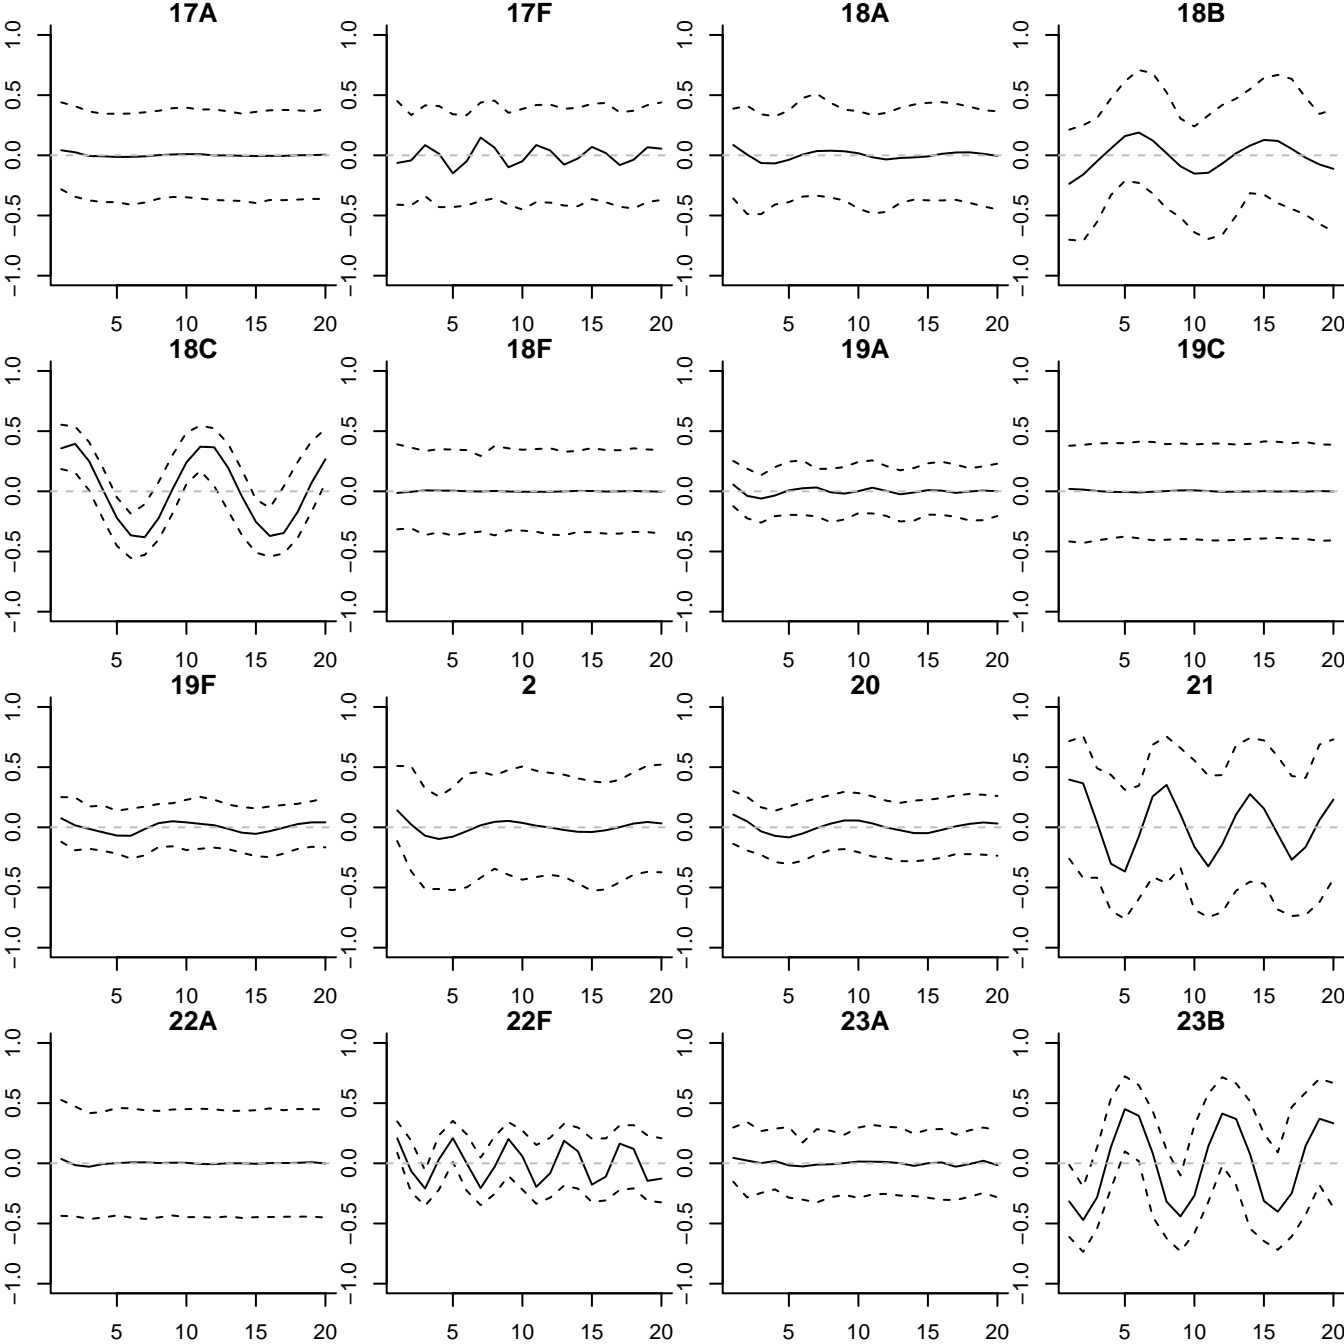

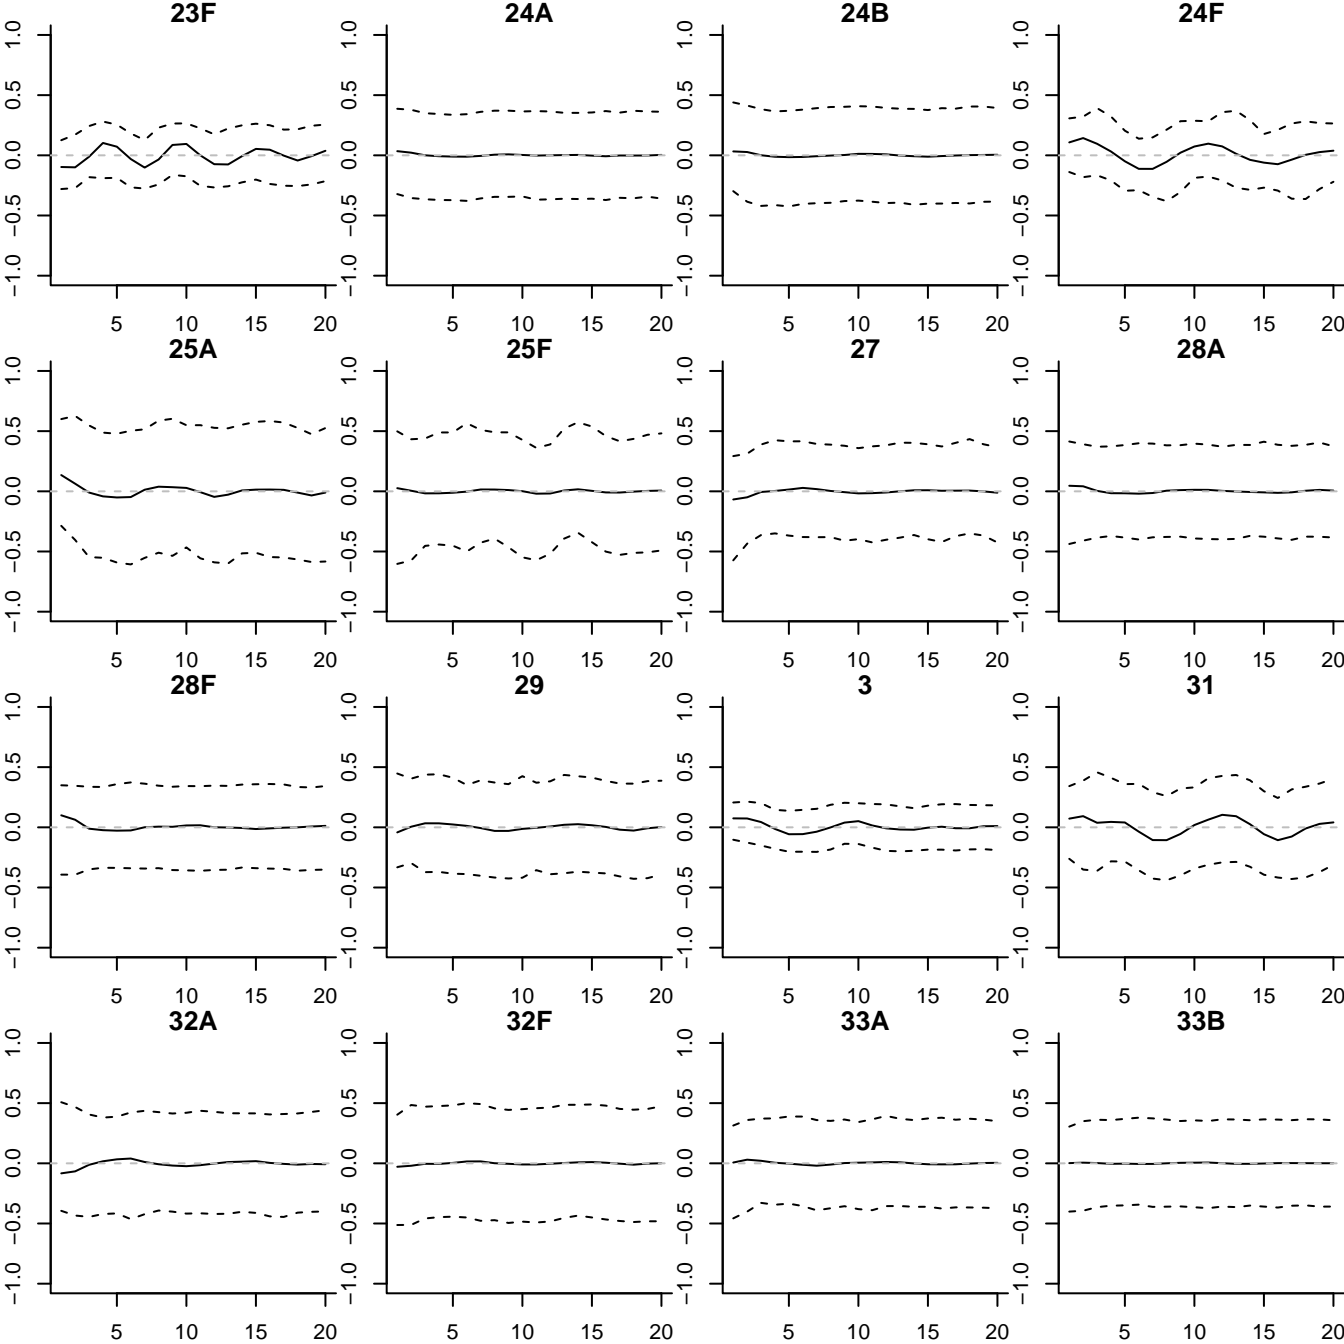

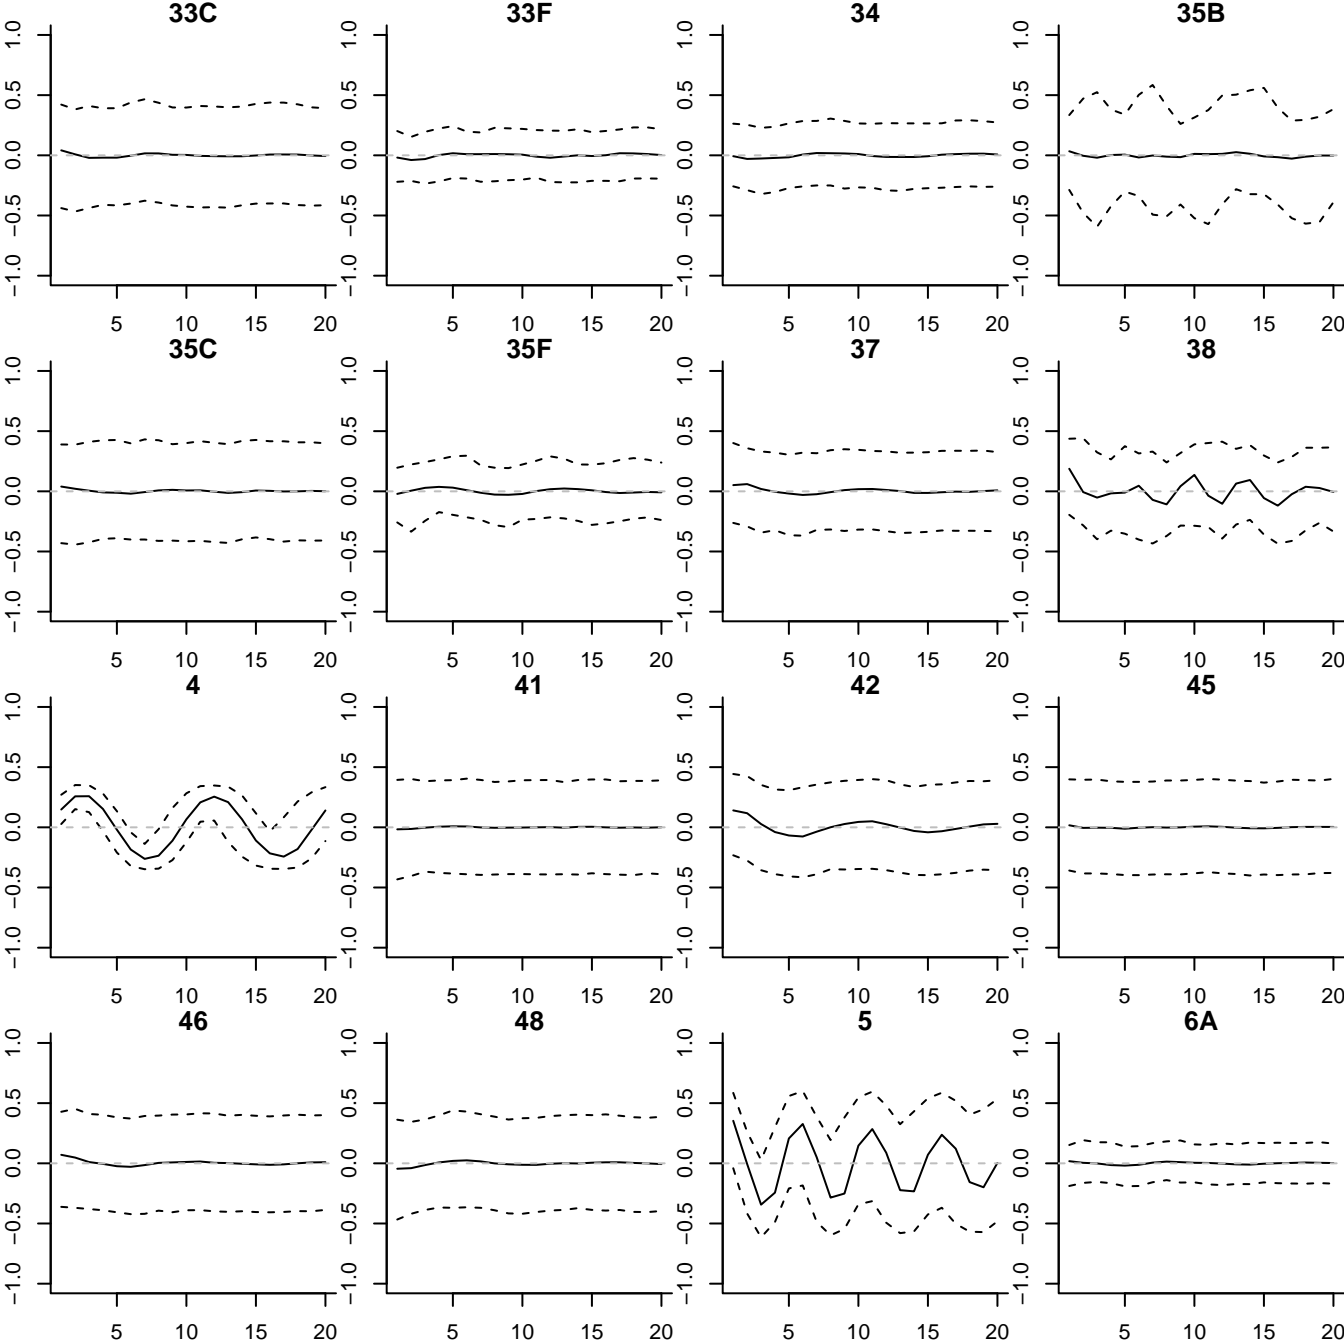

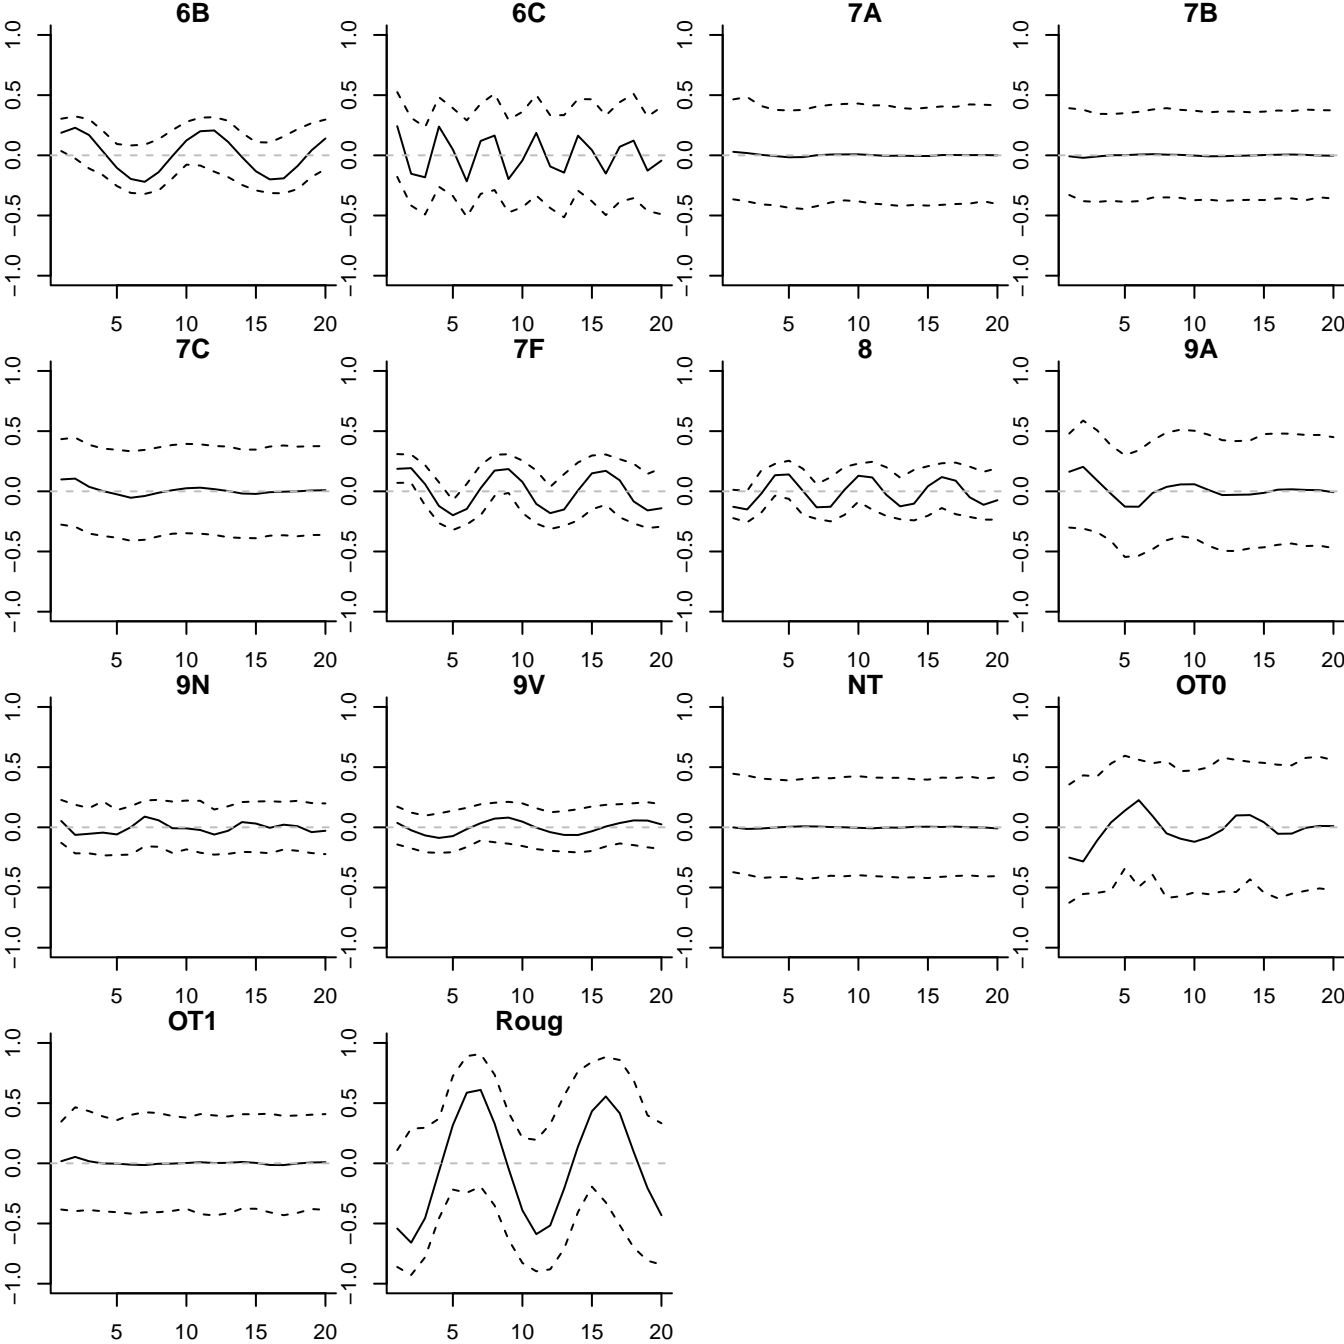

Supplement: ciy875_suppl_supplementary_figure_s5.pdf [file ciy875_suppl_supplementary_figure_s5.pdf]
